# Supplementary material for: Impact of Glyphosate on the Rhizosphere Microbial Communities of An EPSPS-Transgenic Soybean Line ZUTS31 by Metagenome Sequencing
Source: PubMed Central journal article supplement — Curr Genomics. 2018 Jan;19(1):36–49. doi: 10.2174/1389202918666170705162405 (PMC5817875; doi:10.2174/1389202918666170705162405), 2018-01
Supplement: CG-19-36_SD1.pdf [file CG-19-36_SD1.pdf]

## Supplementary Material

# Impact of Glyphosate on the Rhizosphere Microbial Communities of An *EPSPS*-Transgenic Soybean Line ZUTS31 by Metagenome Sequencing

Gui-Hua Lu<sup>1,5,#</sup>, Xiao-Mei Hua<sup>2,#</sup>, Jing Cheng<sup>1</sup>, Yin-Ling Zhu<sup>1</sup>, Gu-Hao Wang<sup>1</sup>, Yan-Jun Pang<sup>1</sup>, Rong-Wu Yang<sup>1</sup>, Lei Zhang<sup>3</sup>, Huixia Shou<sup>4</sup>, Xiao-Ming Wang<sup>1</sup>, Jinliang Qi<sup>1,\*</sup> and Yong-Hua Yang<sup>1,\*</sup>

<sup>1</sup>*NJU–NJFU Joint Institute for Plant Molecular Biology, State Key Laboratory of Pharmaceutical Biotechnology, School of Life Sciences, Nanjing University, Nanjing 210093, China;* <sup>2</sup>*Nanjing Institute of Environmental Sciences, MEP, Nanjing 210042, China;* <sup>3</sup>*Crop Research Institute, Anhui Academy of Agricultural Sciences, Hefei 230031, China;* <sup>4</sup>*State Key Laboratory of Plant Physiology and Biochemistry, College of Life Sciences, Zhejiang University, Hangzhou, 310003, China;* <sup>5</sup>*Jiangsu Collaborative Innovation Center for Modern Crop Production, Nanjing Agricultural University, Nanjing 210095, China*

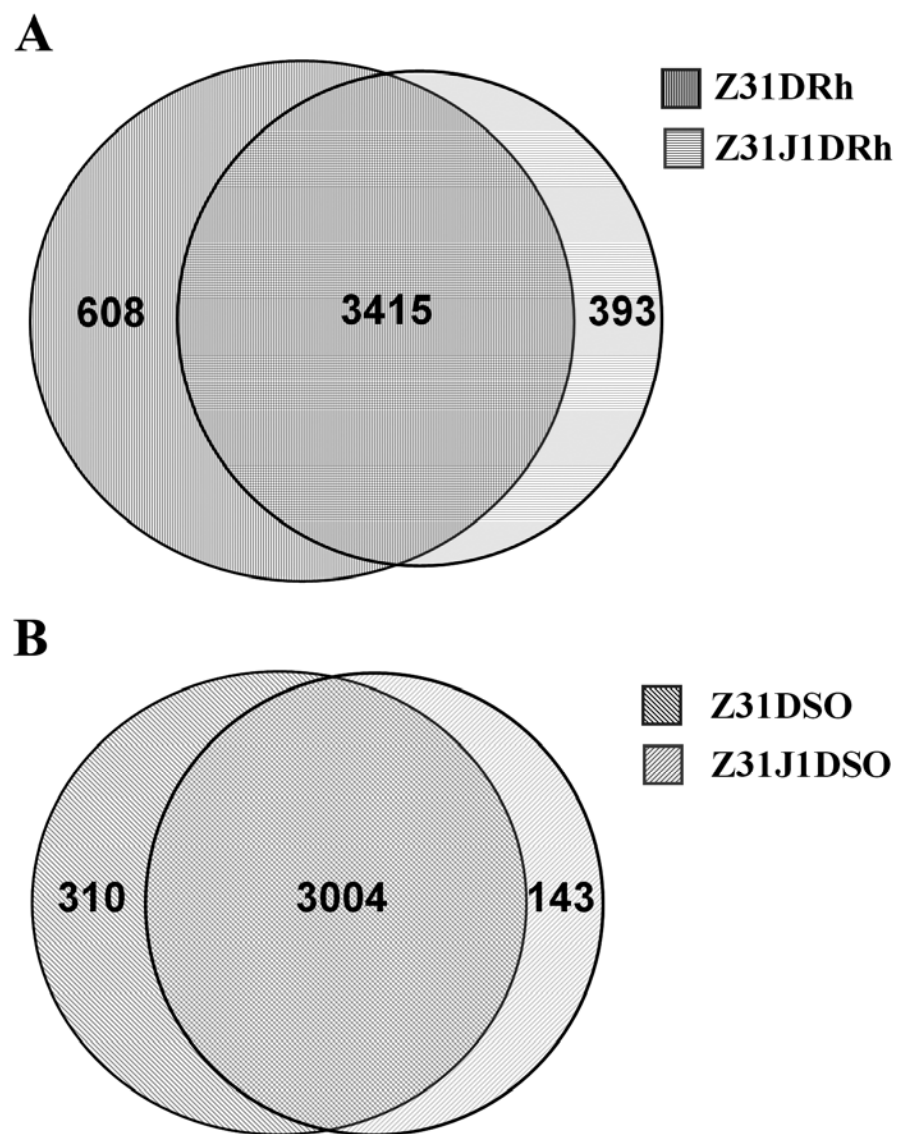

**Fig. (S1). Comparison of OTUs presence in the the rhizosphere soil and surrounding soil (16S rDNA amplicon).** (A) The circles within horizontal lines and vertical lines represented rhizosphere soils of the glyphosate treated Z31J1 and its control Z31, respectively. (B) The circles within light backslash and dark slash represented surrounding soils of the glyphosate treated Z31J1 and its control Z31, respectively. The overlapping area represented the number of OTUs commonly present in the counterpart groups.

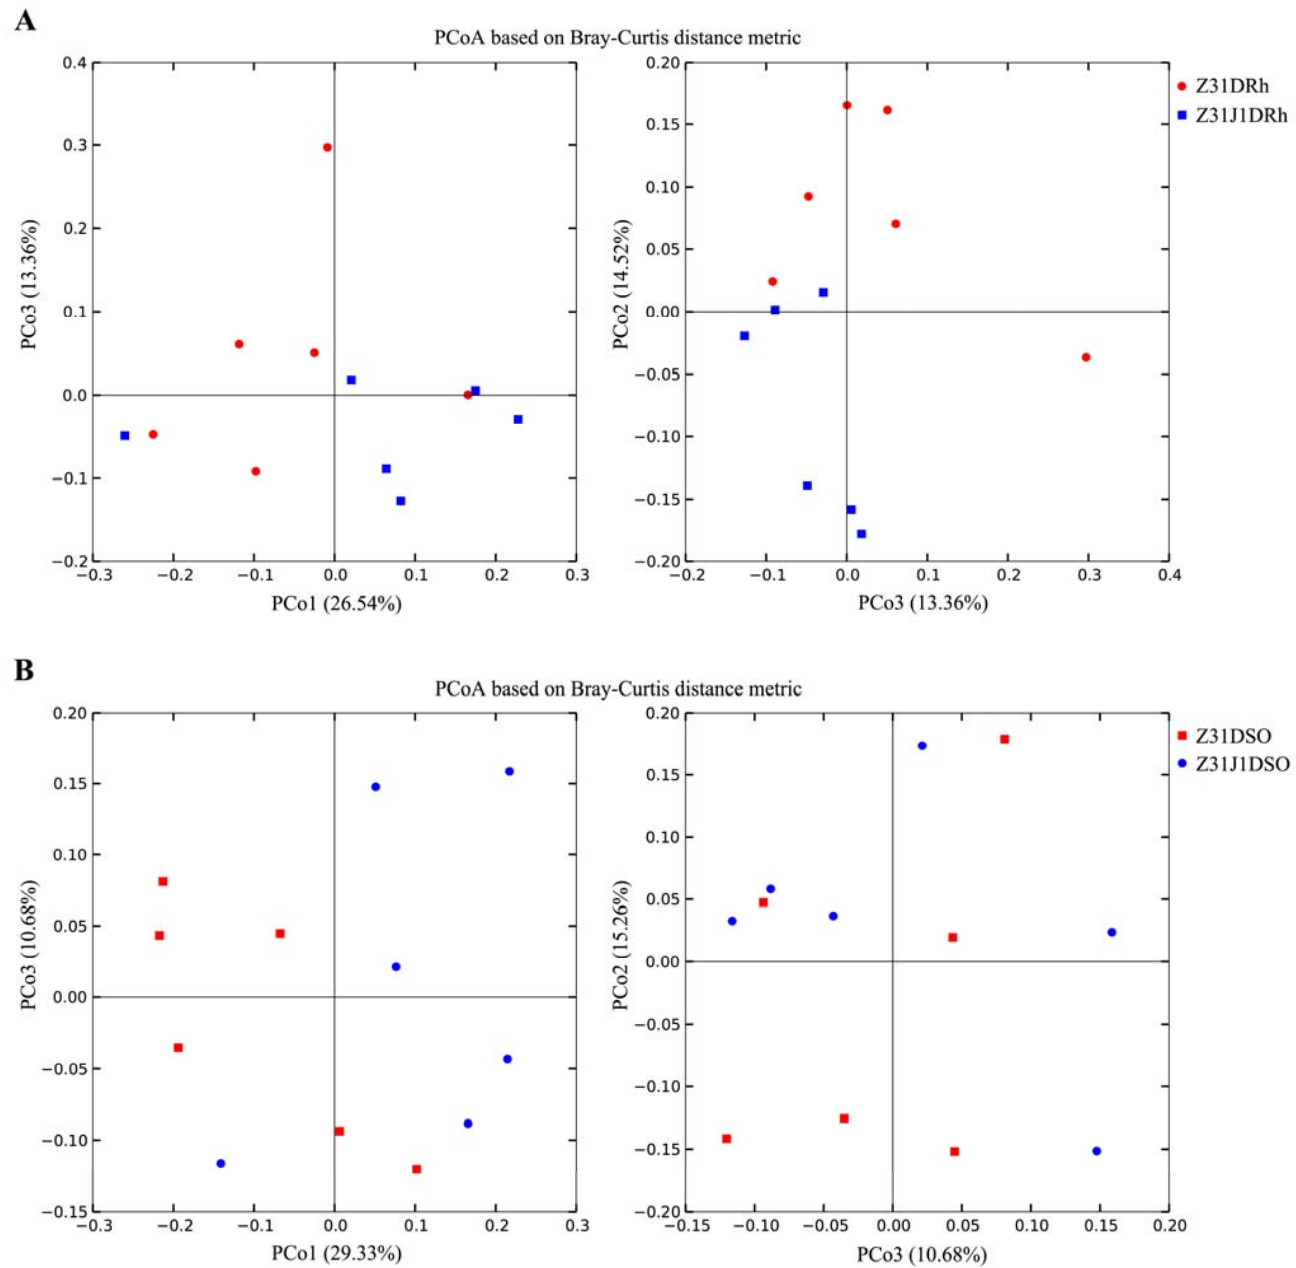

**Fig. (S2). PCoA based on Bray-Curtis distance (16S rDNA amplicon).** The variance explained by each principal coordinate axis was shown in PCo1 vs. PCo3 and PCo3 vs. PCo2. A), the blue squares and red circles represented rhizosphere soil replicates of the glyphosate treated Z31J1 and its control Z31, respectively. B), the blue circles and the red squares represented surrounding soil replicates of glyphosate treated Z31J1 and its control Z31, respectively.

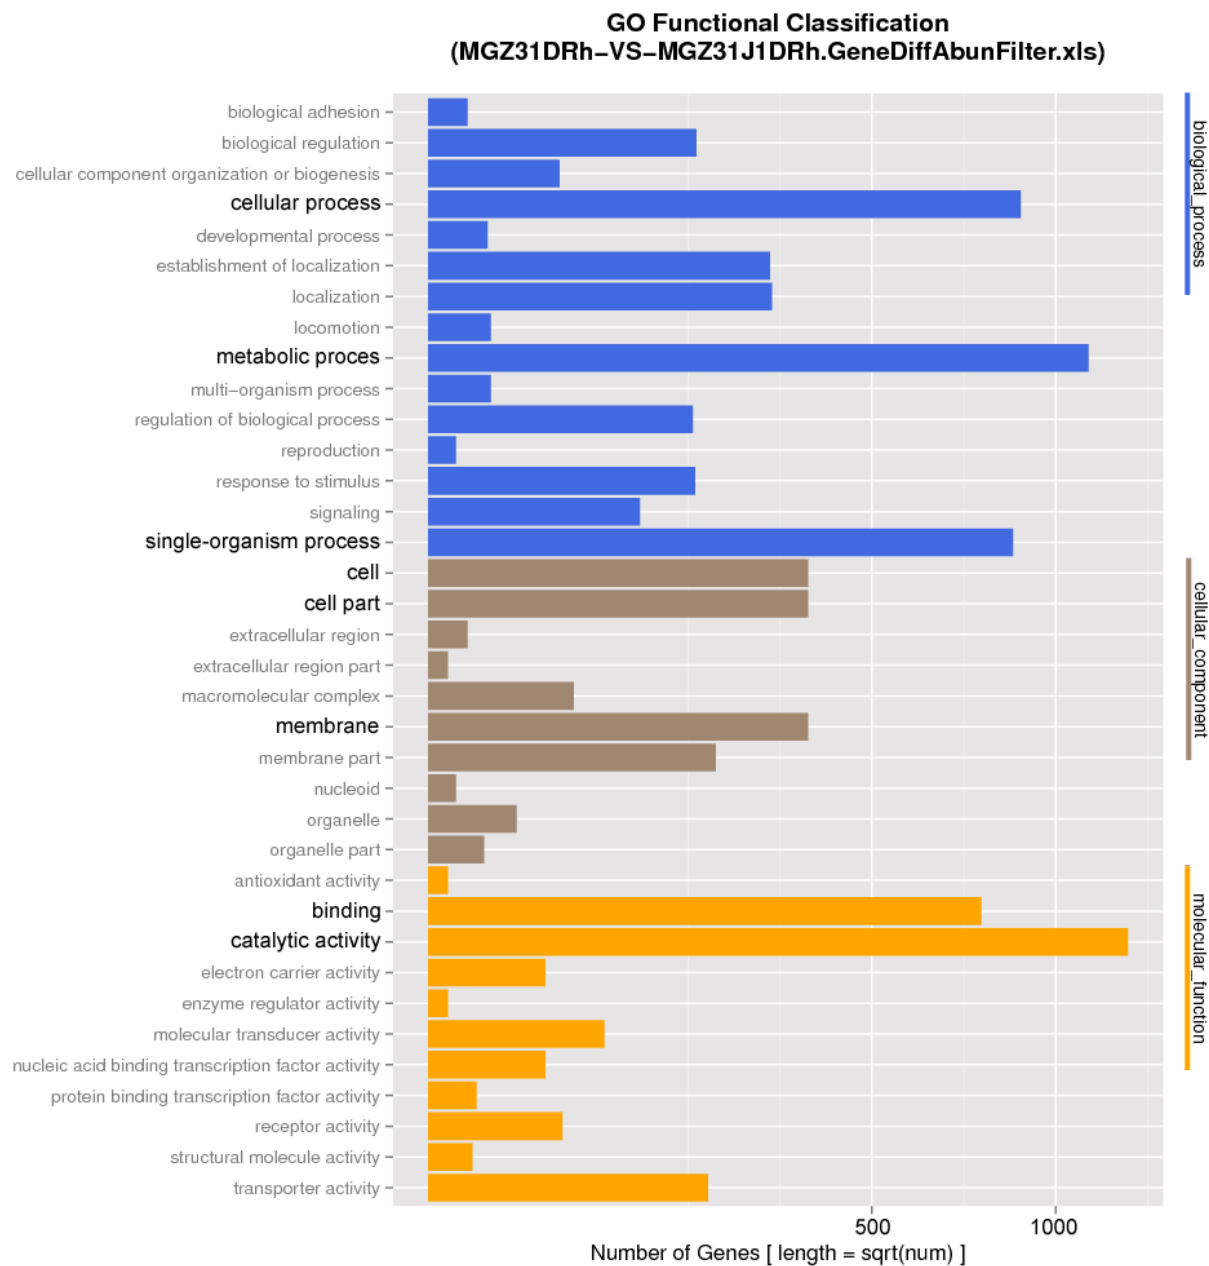

**Fig. (S3). GO functional classification for the pairwise of MGZ31DRh VS MGZ31J1DRh (SOAP).** X-axis means number of genes with different abundance based on data assembled by SOAPdenovo2. Y-axis represents different GO terms. All GO terms were grouped into three ontologies: the blue, brown and the orange color indicated biological process, cellular component, and molecular function, respectively.

**Table S1. Summary of reads, tags and OTUs of rhizosphere soils between glyphosate treated transgenic soybean line Z31 and its control line Z31 in pod-setting stage.**

| Sample name <sup>1</sup> | Clean data □Mbp□ | Clean reads | Total pair reads | Connect tags | Filtered tags at 97% similarity | OTUs |
|--------------------------|------------------|-------------|------------------|--------------|---------------------------------|------|
| Z31DRh1                  | 30.13            | 63,081×2    | 63,081           | 62,831       | 46,530                          | 2228 |
| Z31DRh2                  | 30.33            | 63,540×2    | 63,540           | 63,286       | 45,341                          | 2559 |
| Z31DRh3                  | 27.69            | 57,961×2    | 57,961           | 57,719       | 43,528                          | 2301 |
| Z31DRh4r <sup>2</sup>    | 59.91            | 125,335×2   | 125,335          | 124,347      | 96,261                          | 2719 |
| Z31DRh5                  | 28.97            | 60,644×2    | 60,644           | 60,379       | 44,837                          | 2390 |
| Z31DRh6r <sup>2</sup>    | 61.70            | 129,173×2   | 129,173          | 128,264      | 97,413                          | 2911 |
| Z31J1DRh1                | 32.83            | 68,853×2    | 68,853           | 68,423       | 49,499                          | 2444 |
| Z31J1DRh2                | 33.42            | 70,075×2    | 70,075           | 69,692       | 49,248                          | 2376 |
| Z31J1DRh3                | 32.69            | 68,509×2    | 68,509           | 68,042       | 49,691                          | 2299 |
| Z31J1DRh4                | 30.24            | 63,448×2    | 63,448           | 63,069       | 47,661                          | 2296 |
| Z31J1DRh5                | 30.96            | 64,908×2    | 64,908           | 64,525       | 45,544                          | 2646 |
| Z31J1DRh6                | 27.83            | 58,338×2    | 58,338           | 57,915       | 44,115                          | 1979 |

<sup>1</sup> Six biological replicates of rhizosphere soils of glyphosate treated transgenic soybean line Z31 or its control line Z31 are named as Z31J1DRh1~6 or Z31DRh1~6, respectively.

<sup>2</sup> The “r” in the name of Z31DRh4r and Z31DRh6r indicated that PCR amplification of 16S rDNA and Illumina Miseq sequencing has been done again because the original clean data of Illumina Miseq sequencing from Z31DRh4 and Z31DRh6 metagenomic DNA were not enough.

**Table S2. Summary of reads, tags and OTUs of surrounding soils between glyphosate treated transgenic soybean line Z31 and its control line Z31 in pod-setting stage.**

| Sample name <sup>1</sup> | Clean data ( Mbp ) | Clean reads | Total pair clean reads | Connect tags | Filtered tags at 97% similarity | OTUs |
|--------------------------|--------------------|-------------|------------------------|--------------|---------------------------------|------|
| Z31DSO1r <sup>2</sup>    | 37.02              | 77,366×2    | 77,366                 | 76,882       | 57,330                          | 2412 |
| Z31DSO2                  | 19.45              | 41,712×2    | 41,712                 | 41,525       | 29,994                          | 2127 |
| Z31DSO3                  | 24.64              | 52,754×2    | 52,754                 | 51,448       | 36,591                          | 2258 |
| Z31DSO4                  | 31.85              | 68,205×2    | 68,205                 | 67,724       | 48,680                          | 2395 |
| Z31DSO5                  | 17.94              | 38,447×2    | 38,447                 | 38,195       | 28,069                          | 2096 |
| Z31DSO6                  | 19.92              | 42,677×2    | 42,677                 | 42,419       | 31,723                          | 2055 |
| Z31JDSO1                 | 35.99              | 76,934×2    | 76,934                 | 76,041       | 52,999                          | 2239 |
| Z31JDSO2                 | 21.43              | 45,847×2    | 45,847                 | 45,638       | 33,854                          | 1933 |
| Z31JDSO3                 | 25.12              | 53,992×2    | 53,992                 | 53,724       | 36,602                          | 2119 |
| Z31JDSO4                 | 29.99              | 64,334×2    | 64,334                 | 63,969       | 46,388                          | 2191 |
| Z31JDSO5                 | 31.65              | 67,970×2    | 67,970                 | 67,526       | 46,093                          | 2514 |
| Z31JDSO6                 | 25.23              | 54,113×2    | 54,113                 | 53,833       | 36,800                          | 2028 |

<sup>1</sup> Six biological replicates of surrounding soils of glyphosate treated transgenic line Z31 or its control line Z31 are named as Z31JDSO1~6 or Z31DSO1~6 , respectively.

<sup>2</sup> The “r” in the name of Z31DSO1r indicated that PCR amplification of 16S rDNA and Illumina Miseq sequencing has been done again because the original clean data of Illumina Miseq sequencing from Z31DSO1 metagenomic DNA was not enough.

Table S3. OTU\_table\_for\_biom of Z31DRh &amp; Z31J1DRh(16S)

| # Construct |         |         |         |          |         |          |           |           |           |           |           |           |                                                                                             |
|-------------|---------|---------|---------|----------|---------|----------|-----------|-----------|-----------|-----------|-----------|-----------|---------------------------------------------------------------------------------------------|
| #OTU ID     | Z31DRh1 | Z31DRh2 | Z31DRh3 | Z31DRh4r | Z31DRh5 | Z31DRh6r | Z31J1DRh1 | Z31J1DRh2 | Z31J1DRh3 | Z31J1DRh4 | Z31J1DRh5 | Z31J1DRh6 | taxonomy                                                                                    |
| Otu4056     | 0       | 0       | 0       | 0        | 0       | 0        | 0         | 0         | 0         | 0         | 3         | 0         | Bacteria; Proteobacteria                                                                    |
| Otu4057     | 0       | 0       | 0       | 2        | 1       | 1        | 0         | 0         | 1         | 0         | 0         | 0         | Bacteria                                                                                    |
| Otu4054     | 0       | 2       | 0       | 0        | 0       | 0        | 0         | 0         | 0         | 0         | 0         | 0         | Bacteria                                                                                    |
| Otu3824     | 0       | 0       | 1       | 2        | 0       | 3        | 2         | 1         | 0         | 1         | 0         | 0         | Bacteria; Firmicutes; Bacilli; Bacillales; Paenibacillaceae; Paenibacillus                  |
| Otu4052     | 0       | 4       | 0       | 2        | 2       | 2        | 0         | 3         | 1         | 0         | 0         | 0         | Bacteria; Chloroflexi; Anaerolineae; Anaerolineales; Anaerolinaceae; Anaerolinea            |
| Otu4053     | 0       | 0       | 0       | 0        | 0       | 0        | 0         | 0         | 0         | 0         | 2         | 0         | Bacteria; Verrucomicrobia; Verruco-5; LD1-PB3                                               |
| Otu4050     | 0       | 1       | 0       | 0        | 1       | 3        | 0         | 0         | 1         | 0         | 0         | 0         | Bacteria; Cyanobacteria; Chloroplast; Streptophyta                                          |
| Otu4051     | 0       | 0       | 2       | 0        | 0       | 0        | 0         | 0         | 0         | 0         | 1         | 0         | Bacteria; Bacteroidetes; Sphingobacteria; Sphingobacteriales                                |
| Otu3822     | 1       | 0       | 0       | 1        | 2       | 0        | 1         | 0         | 2         | 1         | 0         | 1         | Bacteria; Bacteroidetes                                                                     |
| Otu4058     | 0       | 2       | 0       | 0        | 0       | 1        | 0         | 0         | 0         | 0         | 2         | 0         | Bacteria; Proteobacteria; Gammaproteobacteria; Legionellales; Coxiellaceae; Aquicella       |
| Otu4059     | 12      | 69      | 8       | 31       | 23      | 24       | 16        | 16        | 17        | 6         | 34        | 5         | Bacteria; Acidobacteria; iii1-8; DS-18                                                      |
| Otu4055     | 1       | 0       | 1       | 3        | 2       | 0        | 0         | 1         | 0         | 0         | 0         | 0         | Bacteria; Bacteroidetes; Cytophagia; Cytophagales; Cytophagaceae                            |
| Otu3439     | 1       | 0       | 0       | 0        | 0       | 3        | 1         | 0         | 0         | 0         | 0         | 0         | Bacteria; Proteobacteria; Alphaproteobacteria; Rhizobiales                                  |
| Otu3438     | 0       | 0       | 0       | 2        | 0       | 0        | 0         | 0         | 0         | 0         | 0         | 0         | Bacteria; TM7; TM7-1                                                                        |
| Otu4429     | 1       | 0       | 0       | 2        | 0       | 2        | 0         | 1         | 0         | 2         | 0         | 2         | Bacteria; Proteobacteria; Gammaproteobacteria                                               |
| Otu1219     | 3       | 0       | 0       | 2        | 1       | 15       | 3         | 0         | 2         | 4         | 0         | 5         | Bacteria; Bacteroidetes; Saprospirae; Saprospirales; Chitinophagaceae                       |
| Otu1218     | 0       | 0       | 2       | 5        | 0       | 5        | 6         | 4         | 5         | 8         | 2         | 0         | Bacteria; Proteobacteria; Alphaproteobacteria; Rhodospirillales; Rhodospirillaceae          |
| Otu1217     | 0       | 1       | 0       | 1        | 0       | 9        | 2         | 0         | 1         | 0         | 0         | 1         | Bacteria; Planctomycetes; Planctomycetia; Planctomycetales; Planctomycetaceae; Planctomyces |
| Otu1216     | 4       | 8       | 2       | 6        | 1       | 20       | 3         | 6         | 3         | 1         | 3         | 4         | Bacteria; Armatimonadetes; 0319-6E2                                                         |
| Otu1215     | 18      | 14      | 15      | 11       | 17      | 19       | 2         | 0         | 3         | 4         | 10        | 4         | Bacteria; Bacteroidetes; Saprospirae; Saprospirales; Chitinophagaceae                       |

| #OTU ID | Z31DRh1 | Z31DRh2 | Z31DRh3 | Z31DRh4r | Z31DRh5 | Z31DRh6r | Z31J1DRh1 | Z31J1DRh2 | Z31J1DRh3 | Z31J1DRh4 | Z31J1DRh5 | Z31J1DRh6 | taxonomy                                                                                 |
|---------|---------|---------|---------|----------|---------|----------|-----------|-----------|-----------|-----------|-----------|-----------|------------------------------------------------------------------------------------------|
| Otu1214 | 0       | 0       | 0       | 0        | 1       | 2        | 0         | 2         | 1         | 1         | 7         | 1         | Bacteria; Bacteroidetes; Sphingobacteriia; Sphingobacteriales                            |
| Otu1213 | 0       | 7       | 0       | 0        | 3       | 4        | 3         | 1         | 0         | 0         | 0         | 0         | Bacteria; Proteobacteria; Alphaproteobacteria; Rickettsiales                             |
| Otu1212 | 14      | 10      | 5       | 19       | 5       | 5        | 21        | 15        | 16        | 14        | 8         | 9         | Bacteria; Acidobacteria; Solibacteres; Solibacterales; Solibacteraceae                   |
| Otu1211 | 3       | 1       | 0       | 0        | 0       | 12       | 0         | 0         | 0         | 0         | 0         | 0         | Bacteria; Cyanobacteria; Nostocophycidae; Nostocales; Nostocaceae                        |
| Otu1210 | 11      | 0       | 0       | 0        | 1       | 0        | 0         | 0         | 1         | 0         | 0         | 2         | Bacteria; Proteobacteria; Deltaproteobacteria; Bdellovibrionales; Bacteriovoraceae       |
| Otu4355 | 0       | 0       | 0       | 0        | 0       | 0        | 2         | 0         | 0         | 0         | 0         | 0         | Bacteria; Gemmatimonadetes; Gemmatimonadetes; N1423WL                                    |
| Otu4309 | 0       | 0       | 0       | 0        | 0       | 0        | 0         | 0         | 1         | 0         | 0         | 2         | Bacteria; Proteobacteria; Gammaproteobacteria                                            |
| Otu2889 | 0       | 0       | 0       | 0        | 1       | 4        | 0         | 0         | 0         | 0         | 0         | 0         | Bacteria; Cyanobacteria                                                                  |
| Otu2888 | 0       | 0       | 0       | 0        | 0       | 7        | 0         | 0         | 0         | 0         | 0         | 0         | Bacteria; Proteobacteria; Deltaproteobacteria; Myxococcales                              |
| Otu2887 | 0       | 0       | 0       | 0        | 0       | 0        | 0         | 3         | 1         | 0         | 1         | 0         | Bacteria; Tenericutes; Mollicutes; Anaeroplasmatales; Anaeroplasmataceae; Asteroleplasma |
| Otu2886 | 0       | 2       | 0       | 0        | 0       | 0        | 0         | 0         | 0         | 0         | 0         | 0         | Bacteria; Proteobacteria; Gammaproteobacteria; Legionellales; Legionellaceae; Legionella |
| Otu2885 | 10      | 1       | 3       | 6        | 4       | 11       | 5         | 2         | 3         | 3         | 3         | 3         | Bacteria; Cyanobacteria; 4C0d-2; MLE1-12                                                 |
| Otu2884 | 0       | 0       | 0       | 0        | 0       | 0        | 2         | 0         | 0         | 0         | 0         | 0         | Bacteria; Chloroflexi                                                                    |
| Otu2883 | 0       | 0       | 0       | 0        | 1       | 3        | 0         | 0         | 0         | 1         | 0         | 1         | Bacteria                                                                                 |
| Otu2882 | 0       | 2       | 0       | 0        | 0       | 0        | 0         | 0         | 0         | 0         | 0         | 0         | Bacteria                                                                                 |
| Otu2881 | 0       | 0       | 0       | 2        | 0       | 0        | 0         | 0         | 0         | 0         | 0         | 0         | Bacteria                                                                                 |
| Otu2880 | 0       | 0       | 0       | 0        | 1       | 1        | 2         | 0         | 1         | 2         | 2         | 0         | Bacteria; Bacteroidetes; Sphingobacteriia; Sphingobacteriales                            |
| Otu4219 | 3       | 0       | 1       | 1        | 0       | 1        | 2         | 0         | 1         | 0         | 0         | 1         | Bacteria; Proteobacteria; Alphaproteobacteria; Rickettsiales                             |
| Otu3664 | 2       | 0       | 0       | 0        | 0       | 0        | 0         | 0         | 0         | 0         | 0         | 0         | Bacteria                                                                                 |
| Otu4356 | 0       | 0       | 0       | 0        | 0       | 2        | 0         | 0         | 1         | 0         | 0         | 0         | Bacteria                                                                                 |
| Otu4268 | 0       | 0       | 0       | 0        | 2       | 0        | 0         | 0         | 0         | 1         | 0         | 0         | Bacteria; Firmicutes; Bacilli; Bacillales; Paenibacillaceae                              |
| Otu3665 | 0       | 2       | 0       | 2        | 1       | 0        | 0         | 0         | 0         | 0         | 0         | 0         | Bacteria; OD1; ZB2                                                                       |



| #OTU ID | Z31DRh1 | Z31DRh2 | Z31DRh3 | Z31DRh4r | Z31DRh5 | Z31DRh6r | Z31J1DRh1 | Z31J1DRh2 | Z31J1DRh3 | Z31J1DRh4 | Z31J1DRh5 | Z31J1DRh6 | taxonomy                                                                                   |
|---------|---------|---------|---------|----------|---------|----------|-----------|-----------|-----------|-----------|-----------|-----------|--------------------------------------------------------------------------------------------|
| Otu3431 | 2       | 0       | 0       | 0        | 0       | 0        | 0         | 0         | 0         | 0         | 0         | 0         | Bacteria; Bacteroidetes; Saprospirae; Saprospirales; Chitinophagaceae                      |
| Otu2799 | 1       | 5       | 2       | 6        | 1       | 4        | 5         | 5         | 2         | 2         | 6         | 1         | Bacteria; Actinobacteria; Thermoleophilia; Gaiellales; Gaiellaceae                         |
| Otu3430 | 0       | 0       | 0       | 0        | 0       | 2        | 0         | 0         | 0         | 0         | 0         | 0         | Bacteria                                                                                   |
| Otu2798 | 0       | 0       | 0       | 0        | 0       | 0        | 0         | 0         | 2         | 0         | 0         | 0         | Bacteria; Gemmatimonadetes; Gemmatimonadetes; N1423WL                                      |
| Otu4353 | 0       | 0       | 0       | 0        | 0       | 3        | 0         | 0         | 0         | 0         | 0         | 0         | Bacteria                                                                                   |
| Otu3418 | 0       | 0       | 0       | 2        | 0       | 0        | 0         | 0         | 0         | 0         | 0         | 0         | Bacteria; Verrucomicrobia; Spartobacteria; Chthoniobacteriales; Chthoniobacteraceae; OR-59 |
| Otu3660 | 0       | 0       | 1       | 1        | 1       | 1        | 1         | 2         | 3         | 0         | 2         | 0         | Bacteria; Gemmatimonadetes; Gemmatimonadetes; Ellin5290                                    |
| Otu4352 | 0       | 1       | 0       | 1        | 2       | 1        | 0         | 0         | 0         | 1         | 0         | 0         | Bacteria; Proteobacteria; Alphaproteobacteria; Rhodospirillales; Rhodospirillaceae         |
| Otu3661 | 0       | 0       | 0       | 0        | 2       | 0        | 1         | 0         | 0         | 0         | 0         | 0         | Bacteria; Proteobacteria; Gammaproteobacteria; Legionellales; Legionellaceae               |
| Otu3662 | 0       | 0       | 0       | 0        | 4       | 0        | 0         | 0         | 0         | 0         | 0         | 0         | Bacteria; Proteobacteria                                                                   |
| Otu3663 | 0       | 1       | 1       | 0        | 0       | 3        | 1         | 0         | 0         | 0         | 0         | 0         | Bacteria; BRC1; PRR-11                                                                     |
| Otu4406 | 0       | 0       | 2       | 1        | 0       | 0        | 0         | 0         | 0         | 0         | 1         | 0         | Bacteria; Verrucomicrobia; Pedosphaerae; Pedosphaerales; Ellin517                          |
| Otu1329 | 6       | 5       | 4       | 9        | 9       | 10       | 5         | 0         | 2         | 8         | 1         | 5         | Bacteria; Proteobacteria; Alphaproteobacteria; Rhizobiales; Methylobacteriaceae            |
| Otu1328 | 1       | 3       | 3       | 9        | 1       | 21       | 0         | 1         | 1         | 2         | 4         | 1         | Bacteria; Planctomycetes; Phycisphaerae; CPla-3                                            |
| Otu1323 | 0       | 0       | 0       | 0        | 0       | 0        | 0         | 0         | 0         | 0         | 0         | 7         | Bacteria; Proteobacteria; Alphaproteobacteria                                              |
| Otu1322 | 2       | 0       | 1       | 0        | 0       | 4        | 3         | 9         | 4         | 0         | 3         | 0         | Bacteria; Chloroflexi; Ktedonobacteria; Thermogemmatissporales; Thermogemmatissporaceae    |
| Otu1321 | 0       | 5       | 0       | 5        | 0       | 0        | 6         | 0         | 0         | 0         | 0         | 0         | Bacteria; Proteobacteria; Deltaproteobacteria; Spirobaillales                              |
| Otu1320 | 1       | 0       | 0       | 1        | 8       | 6        | 0         | 1         | 2         | 2         | 3         | 0         | Bacteria; Proteobacteria; Deltaproteobacteria; Myxococcales                                |
| Otu1327 | 3       | 6       | 1       | 0        | 0       | 0        | 0         | 0         | 8         | 0         | 1         | 0         | Bacteria; Bacteroidetes; Sphingobacteriia; Sphingobacteriales                              |
| Otu1326 | 11      | 3       | 6       | 11       | 6       | 20       | 1         | 5         | 6         | 7         | 2         | 0         | Bacteria; Planctomycetes; Phycisphaerae; WD2101                                            |
| Otu1325 | 3       | 17      | 6       | 2        | 6       | 2        | 5         | 3         | 8         | 7         | 5         | 8         | Bacteria; Proteobacteria; Betaproteobacteria; SC-I-84                                      |
| Otu1324 | 0       | 0       | 0       | 0        | 0       | 10       | 0         | 0         | 0         | 0         | 0         | 0         | Bacteria; Bacteroidetes; Cytophagia; Cytophagales; Amoebophilaceae; SC3-56                 |

| #OTU ID | Z31DRh1 | Z31DRh2 | Z31DRh3 | Z31DRh4r | Z31DRh5 | Z31DRh6r | Z31J1DRh1 | Z31J1DRh2 | Z31J1DRh3 | Z31J1DRh4 | Z31J1DRh5 | Z31J1DRh6 | taxonomy                                                                                     |
|---------|---------|---------|---------|----------|---------|----------|-----------|-----------|-----------|-----------|-----------|-----------|----------------------------------------------------------------------------------------------|
| Otu318  | 38      | 24      | 22      | 44       | 33      | 69       | 17        | 45        | 21        | 28        | 47        | 7         | Bacteria; Proteobacteria; Deltaproteobacteria; Myxococcales                                  |
| Otu319  | 14      | 0       | 0       | 1        | 2       | 57       | 1         | 2         | 6         | 0         | 0         | 0         | Bacteria; Cyanobacteria; Synechococcophycideae; Pseudanabaenales; Pseudanabaenaceae          |
| Otu2661 | 4       | 11      | 5       | 6        | 3       | 12       | 20        | 12        | 12        | 7         | 10        | 5         | Bacteria; Actinobacteria; Actinobacteria; Actinomycetales; Geodermatophilaceae               |
| Otu2660 | 11      | 41      | 7       | 44       | 37      | 21       | 29        | 8         | 4         | 5         | 13        | 11        | Bacteria; Acidobacteria; Chloracidobacteria; 11-24                                           |
| Otu2667 | 0       | 0       | 0       | 1        | 2       | 4        | 1         | 4         | 3         | 0         | 4         | 0         | Bacteria                                                                                     |
| Otu2666 | 0       | 0       | 0       | 0        | 2       | 0        | 0         | 0         | 0         | 0         | 0         | 0         | Bacteria; Proteobacteria; Gammaproteobacteria; Legionellales                                 |
| Otu2665 | 0       | 5       | 0       | 0        | 0       | 0        | 1         | 0         | 0         | 2         | 0         | 0         | Bacteria; Chloroflexi; Anaerolineae; CFB-26                                                  |
| Otu2664 | 0       | 0       | 0       | 0        | 1       | 0        | 0         | 0         | 1         | 2         | 0         | 0         | Bacteria; Planctomycetes; Planctomycetia; Gemmatales; Isosphaeraceae                         |
| Otu310  | 47      | 59      | 70      | 81       | 65      | 92       | 37        | 69        | 36        | 48        | 58        | 9         | Bacteria; Verrucomicrobia; Opiritae; Opiritales; Opiritaceae; Opiritus                       |
| Otu311  | 51      | 30      | 44      | 97       | 21      | 69       | 52        | 69        | 53        | 30        | 37        | 3         | Bacteria; Armatimonadetes; Chthonomonadetes; Chthonomonadales; Chthonomonadaceae             |
| Otu312  | 0       | 0       | 6       | 6        | 6       | 68       | 3         | 9         | 9         | 5         | 0         | 0         | Bacteria; Armatimonadetes; Chthonomonadetes; Chthonomonadales; Chthonomonadaceae             |
| Otu313  | 22      | 34      | 51      | 62       | 39      | 58       | 35        | 36        | 22        | 29        | 82        | 36        | Bacteria; Proteobacteria; Betaproteobacteria; SC-I-84                                        |
| Otu314  | 27      | 8       | 16      | 34       | 22      | 64       | 38        | 58        | 32        | 34        | 22        | 11        | Bacteria; Armatimonadetes; Fimbriimonadia; Fimbriimonadales; Fimbriimonadaceae; Fimbriimonas |
| Otu315  | 3       | 0       | 1       | 1        | 2       | 50       | 1         | 0         | 0         | 0         | 0         | 1         | Bacteria; Verrucomicrobia; Spartobacteria; Chthoniobacteriales; Chthoniobacteraceae          |
| Otu316  | 9       | 21      | 5       | 16       | 11      | 58       | 8         | 11        | 4         | 6         | 12        | 3         | Bacteria; Armatimonadetes; Chthonomonadetes; SJA-22                                          |
| Otu317  | 13      | 7       | 0       | 73       | 0       | 32       | 0         | 9         | 2         | 0         | 0         | 0         | Bacteria; Chloroflexi; Chloroflexi; Roseiflexales                                            |
| Otu3093 | 20      | 13      | 13      | 14       | 7       | 27       | 18        | 22        | 29        | 27        | 19        | 10        | Bacteria; Actinobacteria; Thermoleophilia; Gaiellales; Gaiellaceae                           |
| Otu4128 | 0       | 2       | 2       | 0        | 0       | 0        | 0         | 0         | 1         | 0         | 0         | 1         | Bacteria; Proteobacteria; Gammaproteobacteria; Legionellales; Coxiellaceae                   |
| Otu4129 | 1       | 0       | 0       | 2        | 0       | 0        | 0         | 0         | 0         | 0         | 0         | 0         | Bacteria                                                                                     |
| Otu3203 | 0       | 0       | 0       | 0        | 0       | 2        | 0         | 0         | 0         | 0         | 0         | 0         | Bacteria                                                                                     |
| Otu4127 | 0       | 0       | 0       | 0        | 1       | 0        | 0         | 0         | 0         | 3         | 0         | 3         | Bacteria; Proteobacteria; Deltaproteobacteria; Myxococcales; Cystobacterineae                |
| Otu338  | 8       | 5       | 2       | 2        | 5       | 61       | 0         | 1         | 2         | 6         | 2         | 28        | Bacteria; Bacteroidetes; Cytophagia; Cytophagales; Cytophagaceae; Cytophaga                  |

| #OTU ID | Z31DRh1 | Z31DRh2 | Z31DRh3 | Z31DRh4r | Z31DRh5 | Z31DRh6r | Z31J1DRh1 | Z31J1DRh2 | Z31J1DRh3 | Z31J1DRh4 | Z31J1DRh5 | Z31J1DRh6 | taxonomy                                                                                               |
|---------|---------|---------|---------|----------|---------|----------|-----------|-----------|-----------|-----------|-----------|-----------|--------------------------------------------------------------------------------------------------------|
| Otu4125 | 0       | 2       | 0       | 0        | 0       | 0        | 0         | 0         | 0         | 0         | 0         | 0         | Bacteria; Proteobacteria; Gammaproteobacteria; Legionellales; Coxiellaceae                             |
| Otu4122 | 0       | 0       | 0       | 0        | 0       | 0        | 0         | 0         | 1         | 0         | 2         | 0         | Bacteria; Chloroflexi; Ktedonobacteria; TK10                                                           |
| Otu4123 | 3       | 3       | 0       | 5        | 0       | 5        | 0         | 0         | 1         | 1         | 5         | 0         | Bacteria; Proteobacteria; Gammaproteobacteria; Legionellales                                           |
| Otu4120 | 0       | 0       | 0       | 0        | 2       | 0        | 0         | 0         | 0         | 0         | 0         | 0         | Bacteria; OD1; ZB2                                                                                     |
| Otu4121 | 0       | 0       | 0       | 0        | 0       | 2        | 0         | 0         | 0         | 0         | 0         | 0         | Bacteria; Proteobacteria; Gammaproteobacteria; Legionellales; Legionellaceae                           |
| Otu3823 | 0       | 0       | 4       | 2        | 1       | 0        | 0         | 0         | 0         | 0         | 4         | 0         | Bacteria; Proteobacteria; Deltaproteobacteria; Spirobaillales                                          |
| Otu798  | 0       | 5       | 3       | 6        | 7       | 5        | 6         | 13        | 15        | 6         | 18        | 0         | Bacteria; OD1; SM2F11                                                                                  |
| Otu799  | 2       | 3       | 13      | 3        | 7       | 6        | 10        | 11        | 16        | 15        | 4         | 3         | Bacteria; Gemmatimonadetes; Gemmatimonadetes; Gemmatimonadales                                         |
| Otu3598 | 0       | 0       | 0       | 0        | 0       | 1        | 0         | 0         | 2         | 1         | 1         | 0         | Bacteria; Planctomycetes; Planctomycetia; Gemmatales; Gemmataceae; Gemmata                             |
| Otu3599 | 1       | 0       | 0       | 3        | 0       | 0        | 0         | 0         | 0         | 0         | 1         | 0         | Bacteria; Acidobacteria; Solibacteres; Solibacterales                                                  |
| Otu794  | 0       | 0       | 0       | 23       | 0       | 0        | 0         | 0         | 0         | 0         | 0         | 0         | Bacteria; Bacteroidetes; Bacteroidia; Bacteroidales; Bacteroidaceae; Bacteroides; Bacteroides_fragilis |
| Otu795  | 13      | 14      | 9       | 6        | 5       | 5        | 9         | 6         | 1         | 12        | 12        | 3         | Bacteria; Chloroflexi; Anaerolineae; SBR1031; oc28                                                     |
| Otu796  | 1       | 12      | 3       | 0        | 18      | 15       | 2         | 5         | 2         | 18        | 7         | 3         | Bacteria; Proteobacteria; Deltaproteobacteria; Myxococcales                                            |
| Otu797  | 15      | 16      | 12      | 22       | 6       | 28       | 15        | 22        | 19        | 13        | 16        | 7         | Bacteria; Proteobacteria; Alphaproteobacteria; Rhodospirillales; Rhodospirillaceae                     |
| Otu791  | 4       | 8       | 5       | 28       | 2       | 18       | 13        | 2         | 0         | 7         | 2         | 1         | Bacteria; Proteobacteria; Betaproteobacteria                                                           |
| Otu792  | 5       | 7       | 24      | 22       | 6       | 24       | 10        | 19        | 14        | 10        | 6         | 4         | Bacteria; Planctomycetes; Phycisphaerae; WD2101                                                        |
| Otu793  | 8       | 1       | 1       | 13       | 4       | 31       | 15        | 5         | 8         | 8         | 12        | 8         | Bacteria; Proteobacteria; Alphaproteobacteria                                                          |
| Otu1037 | 10      | 5       | 2       | 12       | 10      | 12       | 9         | 9         | 4         | 8         | 10        | 8         | Bacteria; Proteobacteria; Alphaproteobacteria; Rhodospirillales; Acetobacteraceae                      |
| Otu1036 | 0       | 1       | 0       | 1        | 10      | 17       | 8         | 7         | 13        | 2         | 1         | 0         | Bacteria; Chloroflexi; Anaerolineae; SBR1031; oc28                                                     |
| Otu1035 | 3       | 18      | 5       | 8        | 4       | 0        | 2         | 0         | 0         | 0         | 0         | 2         | Bacteria; Acidobacteria; Chloracidobacteria; RB41                                                      |
| Otu1034 | 17      | 20      | 3       | 10       | 11      | 27       | 26        | 6         | 30        | 14        | 14        | 5         | Bacteria; Proteobacteria; Betaproteobacteria; Rhodocyclales; Rhodocyclaceae; Uliginosibacterium        |
| Otu1033 | 0       | 10      | 0       | 0        | 1       | 0        | 1         | 0         | 0         | 0         | 0         | 0         | Bacteria; Bacteroidetes; Cytophagia; Cytophagales; Cytophagaceae                                       |

| #OTU ID | Z31DRh1 | Z31DRh2 | Z31DRh3 | Z31DRh4r | Z31DRh5 | Z31DRh6r | Z31J1DRh1 | Z31J1DRh2 | Z31J1DRh3 | Z31J1DRh4 | Z31J1DRh5 | Z31J1DRh6 | taxonomy                                                                                          |
|---------|---------|---------|---------|----------|---------|----------|-----------|-----------|-----------|-----------|-----------|-----------|---------------------------------------------------------------------------------------------------|
| Otu1032 | 11      | 14      | 3       | 4        | 5       | 9        | 9         | 0         | 0         | 4         | 7         | 11        | Bacteria; Bacteroidetes; Sphingobacteriia; Sphingobacteriales                                     |
| Otu558  | 24      | 15      | 2       | 0        | 0       | 0        | 0         | 0         | 0         | 0         | 0         | 0         | Bacteria; Bacteroidetes; Saprospirae; Saprospirales; Chitinophagaceae                             |
| Otu559  | 22      | 1       | 1       | 22       | 0       | 13       | 15        | 0         | 2         | 0         | 0         | 15        | Bacteria; Bacteroidetes; Flavobacteriia; Flavobacteriales; Flavobacteriaceae; Flavobacterium      |
| Otu556  | 2       | 3       | 1       | 5        | 5       | 20       | 6         | 10        | 1         | 9         | 1         | 8         | Bacteria; Proteobacteria; Deltaproteobacteria; Myxococcales                                       |
| Otu557  | 4       | 0       | 2       | 3        | 12      | 24       | 6         | 8         | 4         | 15        | 2         | 0         | Bacteria; Proteobacteria; TA18; PHOS-HD29                                                         |
| Otu554  | 3       | 0       | 0       | 0        | 1       | 36       | 0         | 0         | 1         | 0         | 2         | 0         | Bacteria; Cyanobacteria; Synechococcophycidae; Pseudanabaenales                                   |
| Otu555  | 7       | 4       | 9       | 12       | 6       | 34       | 10        | 5         | 19        | 8         | 10        | 4         | Bacteria; Proteobacteria; Alphaproteobacteria; Rhizobiales; Methylobacteriaceae; Methylobacterium |
| Otu552  | 4       | 0       | 0       | 0        | 1       | 33       | 0         | 0         | 0         | 0         | 1         | 0         | Bacteria; Cyanobacteria                                                                           |
| Otu553  | 6       | 18      | 6       | 2        | 12      | 7        | 16        | 9         | 4         | 24        | 17        | 1         | Bacteria; Bacteroidetes; Sphingobacteriia; Sphingobacteriales                                     |
| Otu550  | 2       | 24      | 17      | 10       | 6       | 7        | 17        | 7         | 2         | 6         | 13        | 0         | Bacteria; Gemmatimonadetes; Gemm-5                                                                |
| Otu551  | 11      | 9       | 12      | 9        | 10      | 12       | 25        | 26        | 8         | 19        | 23        | 7         | Bacteria; Proteobacteria; Deltaproteobacteria; Myxococcales                                       |
| Otu776  | 4       | 20      | 2       | 6        | 5       | 2        | 6         | 1         | 1         | 5         | 11        | 1         | Bacteria; Chloroflexi; TK10                                                                       |
| Otu777  | 9       | 11      | 4       | 21       | 8       | 23       | 7         | 4         | 14        | 3         | 11        | 5         | Bacteria; Acidobacteria; Solibacteres; Solibacterales                                             |
| Otu774  | 3       | 5       | 2       | 15       | 4       | 14       | 17        | 7         | 6         | 8         | 9         | 3         | Bacteria; Proteobacteria; Alphaproteobacteria; Rhodospirillales; Rhodospirillaceae                |
| Otu775  | 2       | 0       | 1       | 3        | 2       | 19       | 6         | 7         | 7         | 6         | 5         | 4         | Bacteria; Proteobacteria; Alphaproteobacteria                                                     |
| Otu772  | 17      | 0       | 1       | 1        | 9       | 4        | 0         | 2         | 1         | 0         | 0         | 11        | Bacteria; Verrucomicrobia; Verrucomicrobiae; Verrucomicrobiales; Verrucomicrobiaceae              |
| Otu773  | 43      | 62      | 38      | 48       | 29      | 34       | 56        | 22        | 14        | 12        | 50        | 17        | Bacteria; Acidobacteria; iii1-8; 32-20                                                            |
| Otu954  | 0       | 0       | 0       | 0        | 0       | 11       | 0         | 0         | 0         | 0         | 0         | 0         | Bacteria; Proteobacteria; Alphaproteobacteria; BD7-3                                              |
| Otu955  | 0       | 3       | 6       | 2        | 5       | 1        | 9         | 3         | 11        | 6         | 8         | 1         | Bacteria; Chlamydiae; Chlamydiia; Chlamydiales                                                    |
| Otu958  | 3       | 2       | 2       | 4        | 1       | 2        | 9         | 17        | 8         | 2         | 5         | 1         | Bacteria; Proteobacteria; Deltaproteobacteria; Myxococcales; Myxococcaceae                        |
| Otu959  | 29      | 44      | 28      | 93       | 19      | 49       | 32        | 29        | 49        | 39        | 74        | 12        | Bacteria; Acidobacteria; Solibacteres; Solibacterales                                             |
| Otu778  | 0       | 1       | 1       | 0        | 14      | 0        | 0         | 0         | 0         | 0         | 0         | 0         | Bacteria; Proteobacteria; Betaproteobacteria                                                      |

| #OTU ID | Z31DRh1 | Z31DRh2 | Z31DRh3 | Z31DRh4r | Z31DRh5 | Z31DRh6r | Z31J1DRh1 | Z31J1DRh2 | Z31J1DRh3 | Z31J1DRh4 | Z31J1DRh5 | Z31J1DRh6 | taxonomy                                                                     |
|---------|---------|---------|---------|----------|---------|----------|-----------|-----------|-----------|-----------|-----------|-----------|------------------------------------------------------------------------------|
| Otu779  | 7       | 9       | 8       | 16       | 9       | 16       | 6         | 4         | 9         | 6         | 10        | 5         | Bacteria; Proteobacteria; Deltaproteobacteria; Myxococcales; Polyangiaceae   |
| Otu3201 | 1       | 3       | 1       | 5        | 3       | 0        | 1         | 0         | 0         | 1         | 0         | 0         | Bacteria; Proteobacteria; Deltaproteobacteria                                |
| Otu3936 | 0       | 2       | 0       | 0        | 0       | 0        | 1         | 0         | 0         | 0         | 0         | 0         | Bacteria; Proteobacteria; Gammaproteobacteria; Legionellales; Legionellaceae |
| Otu3937 | 0       | 0       | 0       | 0        | 0       | 0        | 0         | 0         | 0         | 0         | 2         | 0         | Bacteria; Acidobacteria; DA052                                               |
| Otu3048 | 0       | 3       | 0       | 0        | 0       | 0        | 0         | 0         | 0         | 0         | 0         | 0         | Bacteria; Proteobacteria; Gammaproteobacteria; Legionellales                 |
| Otu3049 | 0       | 2       | 0       | 0        | 0       | 1        | 1         | 0         | 1         | 2         | 0         | 1         | Bacteria; Proteobacteria; Alphaproteobacteria; Rickettsiales                 |
| Otu4104 | 2       | 2       | 0       | 0        | 0       | 0        | 0         | 0         | 0         | 0         | 0         | 0         | Bacteria; Firmicutes; Bacilli; Bacillales                                    |
| Otu3040 | 0       | 0       | 0       | 0        | 0       | 1        | 4         | 2         | 3         | 2         | 0         | 0         | Bacteria; Gemmatimonadetes; Gemmatimonadetes; Ellin5290                      |
| Otu3041 | 2       | 37      | 16      | 23       | 37      | 49       | 18        | 55        | 27        | 13        | 34        | 8         | Bacteria; Verrucomicrobia; Pedosphaerae; Pedosphaerales; Ellin515            |
| Otu3042 | 0       | 0       | 0       | 0        | 3       | 0        | 0         | 0         | 0         | 3         | 0         | 0         | Bacteria; Proteobacteria; Deltaproteobacteria; MIZ46                         |
| Otu3043 | 0       | 2       | 0       | 1        | 3       | 0        | 1         | 0         | 0         | 0         | 3         | 0         | Bacteria; TM7; SC3                                                           |
| Otu3044 | 7       | 33      | 10      | 17       | 13      | 22       | 7         | 16        | 19        | 16        | 14        | 9         | Bacteria; Proteobacteria; Deltaproteobacteria; Myxococcales; Polyangiaceae   |
| Otu3045 | 0       | 0       | 0       | 0        | 0       | 0        | 0         | 0         | 0         | 2         | 0         | 0         | Bacteria                                                                     |
| Otu3046 | 0       | 0       | 1       | 0        | 0       | 0        | 0         | 0         | 0         | 0         | 2         | 0         | Bacteria; OD1; Mb-NB09                                                       |
| Otu3047 | 4       | 0       | 0       | 0        | 0       | 0        | 0         | 0         | 0         | 0         | 1         | 0         | Bacteria; Proteobacteria; Gammaproteobacteria                                |
| Otu2380 | 0       | 0       | 0       | 0        | 0       | 3        | 0         | 0         | 0         | 0         | 0         | 0         | Bacteria; Planctomycetes; Phycisphaerae; CPla-3                              |
| Otu2046 | 3       | 0       | 2       | 1        | 1       | 6        | 1         | 1         | 0         | 0         | 1         | 1         | Bacteria; Planctomycetes; Planctomycetia; Gemmatales; Isosphaeraeae          |
| Otu1848 | 2       | 0       | 1       | 1        | 3       | 7        | 2         | 0         | 2         | 0         | 0         | 0         | Bacteria; Proteobacteria; Alphaproteobacteria; Rickettsiales                 |
| Otu3175 | 0       | 0       | 1       | 2        | 0       | 0        | 0         | 0         | 0         | 0         | 0         | 0         | Bacteria; Proteobacteria                                                     |
| Otu1849 | 0       | 2       | 0       | 1        | 0       | 0        | 1         | 4         | 4         | 0         | 0         | 0         | Bacteria; Proteobacteria; Alphaproteobacteria; Rickettsiales                 |
| Otu3109 | 0       | 0       | 2       | 0        | 0       | 0        | 0         | 0         | 0         | 0         | 0         | 0         | Bacteria                                                                     |
| Otu3108 | 1       | 1       | 2       | 1        | 0       | 2        | 0         | 4         | 0         | 0         | 0         | 2         | Bacteria; Actinobacteria; Actinobacteria; Actinomycetales                    |

| #OTU ID | Z31DRh1 | Z31DRh2 | Z31DRh3 | Z31DRh4r | Z31DRh5 | Z31DRh6r | Z31J1DRh1 | Z31J1DRh2 | Z31J1DRh3 | Z31J1DRh4 | Z31J1DRh5 | Z31J1DRh6 | taxonomy                                                                                           |
|---------|---------|---------|---------|----------|---------|----------|-----------|-----------|-----------|-----------|-----------|-----------|----------------------------------------------------------------------------------------------------|
| Otu2381 | 0       | 0       | 0       | 0        | 0       | 0        | 0         | 4         | 6         | 0         | 0         | 0         | Bacteria; Acidobacteria; Acidobacteriia; Acidobacteriales; Koribacteraceae; Candidatus_Koribacter  |
| Otu3104 | 0       | 2       | 0       | 0        | 0       | 0        | 0         | 0         | 0         | 0         | 0         | 0         | Bacteria; Bacteroidetes                                                                            |
| Otu3107 | 2       | 0       | 0       | 0        | 0       | 0        | 0         | 0         | 0         | 0         | 0         | 0         | Bacteria; Proteobacteria; Deltaproteobacteria; Bdellovibrionales; Bdellovibrionaceae; Bdellovibrio |
| Otu3106 | 0       | 3       | 0       | 0        | 2       | 3        | 3         | 0         | 0         | 0         | 0         | 0         | Bacteria; Planctomycetes; Planctomycetia; Gemmatales; Gemmataceae                                  |
| Otu3101 | 0       | 0       | 0       | 0        | 0       | 0        | 1         | 3         | 1         | 0         | 0         | 0         | Bacteria; Proteobacteria; Deltaproteobacteria; Myxococcales                                        |
| Otu3100 | 0       | 1       | 0       | 1        | 0       | 0        | 2         | 0         | 0         | 0         | 0         | 0         | Bacteria; Planctomycetes; OM190; CL500-15                                                          |
| Otu3103 | 1       | 1       | 0       | 2        | 0       | 1        | 1         | 0         | 0         | 0         | 0         | 0         | Bacteria; Armatimonadetes; Chthonomonadetes; Chthonomonadales; Chthonomonadaceae                   |
| Otu3102 | 0       | 0       | 0       | 0        | 0       | 2        | 0         | 0         | 0         | 0         | 1         | 1         | Bacteria; Actinobacteria; Thermoleophilia; Solirubrobacterales                                     |
| Otu2409 | 0       | 3       | 0       | 2        | 1       | 5        | 0         | 1         | 0         | 1         | 1         | 0         | Bacteria; TM6                                                                                      |
| Otu2048 | 2       | 1       | 3       | 0        | 0       | 6        | 3         | 0         | 0         | 0         | 0         | 0         | Bacteria; Actinobacteria; Acidimicrobiia; Acidimicrobiales                                         |
| Otu2403 | 5       | 8       | 0       | 1        | 0       | 4        | 0         | 0         | 0         | 0         | 0         | 2         | Bacteria; Verrucomicrobia; Verrucomicrobiae; Verrucomicrobiales; Verrucomicrobiaceae               |
| Otu2402 | 6       | 3       | 1       | 3        | 2       | 6        | 12        | 2         | 0         | 8         | 4         | 0         | Bacteria; Proteobacteria; Gammaproteobacteria; Legionellales; Coxiellaceae                         |
| Otu2401 | 0       | 1       | 1       | 2        | 2       | 1        | 0         | 0         | 1         | 1         | 2         | 3         | Bacteria; Gemmatimonadetes; Gemm-5                                                                 |
| Otu2400 | 1       | 0       | 0       | 3        | 0       | 0        | 0         | 0         | 0         | 3         | 0         | 0         | Bacteria; Bacteroidetes; Saprospirae; Saprospirales; Chitinophagaceae; Flavisolibacter             |
| Otu2407 | 0       | 0       | 0       | 0        | 0       | 3        | 0         | 0         | 0         | 0         | 0         | 0         | Bacteria; Proteobacteria; Alphaproteobacteria; Rhodospirillales                                    |
| Otu2406 | 0       | 0       | 0       | 0        | 0       | 3        | 0         | 0         | 0         | 0         | 0         | 0         | Bacteria; Proteobacteria; Alphaproteobacteria                                                      |
| Otu2405 | 0       | 1       | 1       | 2        | 0       | 5        | 1         | 0         | 1         | 2         | 1         | 0         | Bacteria; Actinobacteria; Thermoleophilia; Solirubrobacterales                                     |
| Otu2404 | 0       | 0       | 0       | 0        | 0       | 0        | 0         | 4         | 0         | 0         | 0         | 0         | Bacteria; OD1; ZB2                                                                                 |
| Otu174  | 40      | 137     | 51      | 118      | 124     | 83       | 190       | 113       | 92        | 105       | 240       | 79        | Bacteria; Proteobacteria; Betaproteobacteria; MND1                                                 |
| Otu175  | 8       | 1       | 2       | 0        | 2       | 1        | 1         | 0         | 8         | 0         | 3         | 134       | Bacteria; Bacteroidetes; Flavobacteriia; Flavobacteriales; Flavobacteriaceae; Flavobacterium       |
| Otu176  | 29      | 20      | 43      | 70       | 55      | 160      | 47        | 98        | 65        | 78        | 48        | 47        | Bacteria; Acidobacteria; Acidobacteriia; Acidobacteriales; Koribacteraceae; Candidatus_Koribacter  |
| Otu177  | 2       | 0       | 6       | 43       | 1       | 2        | 1         | 0         | 0         | 0         | 98        | 0         | Bacteria; Chlamydiae; Chlamydia; Chlamydiales                                                      |

| #OTU ID | Z31DRh1 | Z31DRh2 | Z31DRh3 | Z31DRh4r | Z31DRh5 | Z31DRh6r | Z31J1DRh1 | Z31J1DRh2 | Z31J1DRh3 | Z31J1DRh4 | Z31J1DRh5 | Z31J1DRh6 | taxonomy                                                                                                  |
|---------|---------|---------|---------|----------|---------|----------|-----------|-----------|-----------|-----------|-----------|-----------|-----------------------------------------------------------------------------------------------------------|
| Otu170  | 31      | 28      | 29      | 63       | 17      | 127      | 20        | 28        | 47        | 22        | 45        | 10        | Bacteria; Armatimonadetes; Chthonomonadetes; SJA-22                                                       |
| Otu171  | 63      | 91      | 110     | 120      | 66      | 245      | 76        | 84        | 94        | 35        | 104       | 87        | Bacteria; Actinobacteria; Actinobacteria; Actinomycetales; Intrasporangiaceae                             |
| Otu172  | 56      | 37      | 15      | 53       | 26      | 119      | 23        | 64        | 30        | 33        | 12        | 27        | Bacteria; Bacteroidetes; Saprospirae; Saprospirales; Chitinophagaceae                                     |
| Otu173  | 43      | 48      | 48      | 105      | 29      | 62       | 82        | 102       | 60        | 43        | 54        | 15        | Bacteria; Verrucomicrobia; Pedosphaerae; Pedosphaerales                                                   |
| Otu3820 | 0       | 0       | 2       | 4        | 1       | 2        | 0         | 3         | 0         | 2         | 0         | 0         | Bacteria; Bacteroidetes; Cytophagia; Cytophagales; Cytophagaceae; Siphonobacter; Siphonobacter_aquaclarae |
| Otu178  | 14      | 5       | 119     | 28       | 4       | 17       | 17        | 2         | 12        | 4         | 9         | 126       | Bacteria; Bacteroidetes; Saprospirae; Saprospirales; Chitinophagaceae; Chitinophaga                       |
| Otu179  | 7       | 22      | 2       | 23       | 52      | 253      | 34        | 31        | 149       | 16        | 89        | 30        | Bacteria; Proteobacteria; Betaproteobacteria; Neisseriales; Neisseriaceae                                 |
| Otu3981 | 2       | 3       | 1       | 2        | 7       | 1        | 5         | 5         | 2         | 8         | 5         | 1         | Bacteria; Bacteroidetes                                                                                   |
| Otu1693 | 3       | 1       | 0       | 2        | 3       | 1        | 2         | 2         | 1         | 5         | 1         | 0         | Bacteria; Proteobacteria; Deltaproteobacteria; Myxococcales                                               |
| Otu1692 | 0       | 8       | 5       | 10       | 4       | 8        | 4         | 0         | 3         | 1         | 5         | 2         | Bacteria; Armatimonadetes; 0319-6E2                                                                       |
| Otu1691 | 9       | 4       | 1       | 8        | 2       | 4        | 2         | 6         | 6         | 4         | 8         | 7         | Bacteria; Proteobacteria; Alphaproteobacteria; Sphingomonadales; Erythrobacteraceae                       |
| Otu1690 | 3       | 4       | 1       | 6        | 3       | 4        | 4         | 3         | 0         | 1         | 6         | 1         | Bacteria; Planctomycetes; Planctomycetia; Gemmatales; Gemmataceae                                         |
| Otu1697 | 0       | 6       | 0       | 2        | 0       | 3        | 0         | 0         | 0         | 0         | 0         | 0         | Bacteria; Bacteroidetes                                                                                   |
| Otu1696 | 0       | 3       | 1       | 1        | 1       | 4        | 8         | 2         | 5         | 0         | 4         | 0         | Bacteria; Proteobacteria; Alphaproteobacteria; Ellin329                                                   |
| Otu1695 | 0       | 2       | 7       | 4        | 2       | 6        | 5         | 9         | 5         | 6         | 3         | 3         | Bacteria; Planctomycetes; Phycisphaerae; WD2101                                                           |
| Otu1694 | 0       | 0       | 0       | 0        | 4       | 0        | 1         | 0         | 2         | 0         | 1         | 0         | Bacteria; OD1; ZB2                                                                                        |
| Otu1846 | 2       | 2       | 0       | 2        | 1       | 1        | 2         | 3         | 4         | 4         | 0         | 3         | Bacteria; Proteobacteria; Alphaproteobacteria; Rhodospirillales; Rhodospirillaceae                        |
| Otu1699 | 1       | 6       | 1       | 2        | 0       | 7        | 0         | 0         | 4         | 1         | 2         | 2         | Bacteria; Chloroflexi; Ktedonobacteria                                                                    |
| Otu1698 | 0       | 4       | 2       | 0        | 0       | 6        | 3         | 1         | 0         | 0         | 4         | 0         | Bacteria; Elusimicrobia; Elusimicrobia; MVP-88                                                            |
| Otu1847 | 0       | 2       | 0       | 3        | 0       | 0        | 6         | 5         | 3         | 0         | 2         | 3         | Bacteria; Proteobacteria; Gammaproteobacteria; Legionellales; Coxiellaceae; Aquicella                     |
| Otu1513 | 8       | 0       | 2       | 2        | 9       | 3        | 0         | 0         | 5         | 1         | 0         | 1         | Bacteria; Acidobacteria; Acidobacteriia; Acidobacteriales                                                 |
| Otu4241 | 0       | 0       | 0       | 0        | 0       | 2        | 0         | 0         | 0         | 0         | 0         | 0         | Bacteria; Proteobacteria; Deltaproteobacteria; Myxococcales                                               |

| #OTU ID | Z31DRh1 | Z31DRh2 | Z31DRh3 | Z31DRh4r | Z31DRh5 | Z31DRh6r | Z31J1DRh1 | Z31J1DRh2 | Z31J1DRh3 | Z31J1DRh4 | Z31J1DRh5 | Z31J1DRh6 | taxonomy                                                                                                          |
|---------|---------|---------|---------|----------|---------|----------|-----------|-----------|-----------|-----------|-----------|-----------|-------------------------------------------------------------------------------------------------------------------|
| Otu2128 | 0       | 4       | 0       | 0        | 0       | 0        | 0         | 0         | 0         | 0         | 0         | 0         | Bacteria; Actinobacteria; Actinobacteria; Actinomycetales; Microbacteriaceae                                      |
| Otu4215 | 0       | 0       | 0       | 0        | 0       | 0        | 2         | 0         | 0         | 0         | 0         | 0         | Bacteria; Acidobacteria; Solibacteres; Solibacterales                                                             |
| Otu2129 | 0       | 2       | 3       | 5        | 2       | 3        | 3         | 7         | 0         | 2         | 3         | 1         | Bacteria; Gemmatimonadetes; Gemm-2                                                                                |
| Otu2317 | 0       | 0       | 0       | 1        | 0       | 0        | 0         | 3         | 0         | 0         | 0         | 0         | Bacteria; OP11; OP11-3                                                                                            |
| Otu2316 | 0       | 4       | 2       | 2        | 6       | 3        | 4         | 4         | 2         | 0         | 3         | 0         | Bacteria; Firmicutes; Clostridia; Clostridiales; Clostridiaceae; Clostridium                                      |
| Otu2315 | 0       | 0       | 0       | 1        | 0       | 0        | 0         | 0         | 1         | 0         | 4         | 0         | Bacteria; Chlamydiae; Chlamydia; Chlamydiales; Rhabdochlamydiaceae; Candidatus_Rhabdochlamydia                    |
| Otu2314 | 28      | 0       | 1       | 5        | 1       | 58       | 2         | 4         | 6         | 0         | 0         | 0         | Bacteria; Verrucomicrobia; Opitutae; Opitutales; Opitutaceae; Opitutus                                            |
| Otu2313 | 0       | 0       | 0       | 5        | 2       | 0        | 0         | 0         | 0         | 0         | 0         | 0         | Bacteria; Chloroflexi                                                                                             |
| Otu2312 | 3       | 4       | 0       | 0        | 1       | 0        | 2         | 1         | 0         | 1         | 2         | 0         | Bacteria; Proteobacteria; Deltaproteobacteria                                                                     |
| Otu2311 | 0       | 0       | 0       | 0        | 0       | 4        | 0         | 0         | 0         | 0         | 0         | 0         | Bacteria; Firmicutes; Clostridia; Clostridiales                                                                   |
| Otu2310 | 1       | 0       | 0       | 0        | 2       | 3        | 0         | 1         | 0         | 0         | 0         | 0         | Bacteria; Proteobacteria; Alphaproteobacteria; Rickettsiales; mitochondria                                        |
| Otu3211 | 0       | 0       | 1       | 4        | 1       | 4        | 2         | 0         | 2         | 2         | 0         | 0         | Bacteria; Proteobacteria; Deltaproteobacteria; Bdellovibrionales; Bdellovibrionaceae; Bdellovibrio                |
| Otu3210 | 1       | 2       | 0       | 0        | 1       | 0        | 0         | 1         | 0         | 0         | 0         | 0         | Bacteria; Acidobacteria; Solibacteres; Solibacterales                                                             |
| Otu3213 | 0       | 1       | 0       | 2        | 0       | 0        | 0         | 0         | 0         | 0         | 6         | 0         | Bacteria; Proteobacteria; Betaproteobacteria; MND1                                                                |
| Otu3212 | 0       | 0       | 0       | 3        | 0       | 0        | 1         | 1         | 2         | 1         | 0         | 1         | Bacteria; Proteobacteria; Alphaproteobacteria; Rickettsiales; mitochondria                                        |
| Otu3215 | 1       | 0       | 0       | 1        | 3       | 5        | 0         | 2         | 0         | 0         | 0         | 1         | Bacteria; Chloroflexi; Thermomicrobia; JG30-KF-CM45                                                               |
| Otu3214 | 1       | 11      | 1       | 0        | 0       | 0        | 0         | 1         | 0         | 0         | 0         | 0         | Bacteria; Acidobacteria; Chloracidobacteria; RB41; Ellin6075                                                      |
| Otu2319 | 0       | 0       | 1       | 3        | 0       | 3        | 1         | 3         | 2         | 1         | 0         | 0         | Bacteria; Actinobacteria; Actinobacteria; Actinomycetales; Mycobacteriaceae; Mycobacterium; Mycobacterium_celatum |
| Otu2318 | 0       | 0       | 0       | 3        | 3       | 6        | 0         | 0         | 0         | 0         | 2         | 0         | Bacteria; Planctomycetes; Phycisphaerae; WD2101                                                                   |
| Otu2124 | 1       | 10      | 1       | 0        | 1       | 0        | 2         | 1         | 1         | 2         | 1         | 1         | Bacteria; Gemmatimonadetes; Gemm-1                                                                                |
| Otu2125 | 0       | 3       | 0       | 1        | 0       | 0        | 0         | 0         | 0         | 2         | 0         | 0         | Bacteria; Elusimicrobia; Elusimicrobia; MVP-88                                                                    |
| Otu2388 | 0       | 2       | 1       | 1        | 4       | 0        | 0         | 0         | 0         | 0         | 2         | 0         | Bacteria                                                                                                          |



| #OTU ID | Z31DRh1 | Z31DRh2 | Z31DRh3 | Z31DRh4r | Z31DRh5 | Z31DRh6r | Z31J1DRh1 | Z31J1DRh2 | Z31J1DRh3 | Z31J1DRh4 | Z31J1DRh5 | Z31J1DRh6 | taxonomy                                                                                               |
|---------|---------|---------|---------|----------|---------|----------|-----------|-----------|-----------|-----------|-----------|-----------|--------------------------------------------------------------------------------------------------------|
| Otu2389 | 0       | 1       | 0       | 0        | 0       | 4        | 0         | 0         | 0         | 0         | 1         | 0         | Bacteria; Actinobacteria; Acidimicrobiia; Acidimicrobiales; C111                                       |
| Otu4332 | 0       | 0       | 0       | 0        | 1       | 2        | 0         | 1         | 0         | 0         | 0         | 0         | Bacteria; Acidobacteria; DA052; Ellin6513                                                              |
| Otu2289 | 0       | 0       | 2       | 3        | 3       | 2        | 7         | 2         | 4         | 4         | 0         | 1         | Bacteria; Proteobacteria; Alphaproteobacteria; Rhodospirillales; Rhodospirillaceae                     |
| Otu3749 | 0       | 0       | 3       | 1        | 1       | 3        | 0         | 0         | 2         | 0         | 0         | 0         | Bacteria; Bacteroidetes; Saprospirae; Saprospirales; Chitinophagaceae                                  |
| Otu1515 | 0       | 5       | 1       | 3        | 2       | 3        | 1         | 3         | 2         | 2         | 3         | 1         | Bacteria                                                                                               |
| Otu2288 | 2       | 0       | 0       | 4        | 1       | 8        | 2         | 2         | 5         | 5         | 0         | 6         | Bacteria; Proteobacteria; Deltaproteobacteria; MIZ46                                                   |
| Otu4438 | 0       | 0       | 0       | 0        | 0       | 0        | 0         | 2         | 1         | 1         | 1         | 0         | Bacteria; Proteobacteria; Alphaproteobacteria; BD7-3                                                   |
| Otu2078 | 24      | 2       | 5       | 50       | 3       | 9        | 0         | 1         | 2         | 0         | 0         | 17        | Bacteria; Proteobacteria; Alphaproteobacteria; Sphingomonadales; Sphingomonadaceae; Sphingomonas       |
| Otu2079 | 0       | 0       | 0       | 0        | 0       | 0        | 5         | 0         | 0         | 0         | 0         | 0         | Bacteria; Actinobacteria; Actinobacteria; Actinomycetales; Micrococcales; Rothia; Rothia_mucilaginosus |
| Otu2072 | 1       | 0       | 4       | 1        | 0       | 3        | 4         | 6         | 7         | 0         | 0         | 0         | Bacteria; Actinobacteria; Acidimicrobiia; Acidimicrobiales                                             |
| Otu2073 | 0       | 0       | 0       | 0        | 0       | 0        | 0         | 0         | 0         | 3         | 0         | 0         | Bacteria; Armatimonadetes; 0319-6E2                                                                    |
| Otu2070 | 1       | 5       | 0       | 2        | 2       | 3        | 4         | 2         | 0         | 3         | 0         | 0         | Bacteria; Planctomycetes; Planctomycetia; Pirellulales; Pirellulaceae                                  |
| Otu2071 | 0       | 0       | 1       | 0        | 2       | 0        | 3         | 1         | 3         | 4         | 1         | 2         | Bacteria; OD1; SM2F11                                                                                  |
| Otu2076 | 0       | 0       | 1       | 3        | 0       | 3        | 0         | 1         | 0         | 4         | 2         | 0         | Bacteria                                                                                               |
| Otu2077 | 2       | 1       | 0       | 0        | 0       | 0        | 0         | 0         | 0         | 6         | 0         | 0         | Bacteria; Proteobacteria; Alphaproteobacteria; Rickettsiales; mitochondria                             |
| Otu2074 | 0       | 4       | 0       | 0        | 0       | 3        | 0         | 0         | 0         | 0         | 1         | 0         | Bacteria; Cyanobacteria; 4C0d-2; MLE1-12                                                               |
| Otu2075 | 1       | 4       | 0       | 0        | 2       | 0        | 0         | 5         | 0         | 0         | 5         | 0         | Bacteria; Verrucomicrobia; Pedosphaerae; Pedosphaerales; Ellin517                                      |
| Otu3853 | 1       | 0       | 0       | 2        | 1       | 2        | 0         | 0         | 0         | 0         | 1         | 0         | Bacteria; Chloroflexi; TK10; B07_WMSP1                                                                 |
| Otu3852 | 0       | 0       | 1       | 0        | 0       | 2        | 0         | 1         | 0         | 1         | 0         | 0         | Bacteria; OP3; koll11                                                                                  |
| Otu3851 | 0       | 3       | 0       | 0        | 0       | 0        | 0         | 0         | 0         | 0         | 0         | 0         | Bacteria; Chloroflexi; TK10; AKYG885; Dolo_23                                                          |
| Otu2387 | 0       | 1       | 0       | 2        | 0       | 0        | 3         | 0         | 0         | 0         | 2         | 0         | Bacteria; Gemmatimonadetes; Gemmatimonadetes                                                           |
| Otu2278 | 0       | 5       | 1       | 2        | 0       | 2        | 0         | 1         | 1         | 1         | 2         | 0         | Bacteria; Chloroflexi; Thermomicrobia                                                                  |

| #OTU ID | Z31DRh1 | Z31DRh2 | Z31DRh3 | Z31DRh4r | Z31DRh5 | Z31DRh6r | Z31J1DRh1 | Z31J1DRh2 | Z31J1DRh3 | Z31J1DRh4 | Z31J1DRh5 | Z31J1DRh6 | taxonomy                                                                                            |
|---------|---------|---------|---------|----------|---------|----------|-----------|-----------|-----------|-----------|-----------|-----------|-----------------------------------------------------------------------------------------------------|
| Otu2279 | 0       | 1       | 2       | 1        | 0       | 6        | 0         | 0         | 0         | 2         | 0         | 0         | Bacteria; Actinobacteria; Actinobacteria; Actinomycetales; Streptosporangiaceae                     |
| Otu3855 | 14      | 40      | 11      | 31       | 36      | 23       | 29        | 8         | 5         | 7         | 23        | 4         | Bacteria; Acidobacteria; Chloracidobacteria; 11-24                                                  |
| Otu3854 | 1       | 2       | 0       | 3        | 0       | 1        | 0         | 1         | 0         | 0         | 1         | 0         | Bacteria; Actinobacteria; MB-A2-108; 0319-7L14                                                      |
| Otu2274 | 0       | 0       | 1       | 4        | 0       | 0        | 0         | 0         | 0         | 2         | 1         | 0         | Bacteria; Armatimonadetes; SHA-37                                                                   |
| Otu2275 | 0       | 0       | 0       | 3        | 0       | 0        | 0         | 0         | 0         | 0         | 0         | 0         | Bacteria; Firmicutes; Clostridia; Clostridiales; Lachnospiraceae; Dorea                             |
| Otu2276 | 8       | 1       | 5       | 4        | 0       | 7        | 3         | 4         | 4         | 8         | 5         | 0         | Bacteria; Proteobacteria; Gammaproteobacteria; Legionellales; Coxiellaceae                          |
| Otu2277 | 0       | 0       | 0       | 3        | 0       | 0        | 0         | 0         | 0         | 0         | 3         | 0         | Bacteria; WS3; PRR-12; Sediment-1; PRR-10                                                           |
| Otu2270 | 1       | 5       | 0       | 1        | 1       | 0        | 2         | 0         | 0         | 2         | 0         | 0         | Bacteria; Chlamydiae; Chlamydia; Chlamydiales                                                       |
| Otu2271 | 47      | 74      | 49      | 57       | 64      | 110      | 60        | 61        | 53        | 85        | 81        | 36        | Bacteria; Acidobacteria; Acidobacteria-6; iii1-15                                                   |
| Otu2272 | 3       | 0       | 0       | 0        | 0       | 0        | 1         | 0         | 0         | 3         | 1         | 0         | Bacteria                                                                                            |
| Otu2273 | 0       | 0       | 0       | 0        | 0       | 0        | 0         | 0         | 3         | 3         | 1         | 0         | Bacteria; Proteobacteria; Gammaproteobacteria                                                       |
| Otu4339 | 0       | 2       | 0       | 0        | 0       | 0        | 0         | 0         | 0         | 0         | 2         | 0         | Bacteria; Proteobacteria; Alphaproteobacteria                                                       |
| Otu3821 | 0       | 0       | 1       | 0        | 0       | 2        | 0         | 0         | 0         | 0         | 1         | 0         | Bacteria; Planctomycetes; Planctomycetia; Gemmatales; Gemmataceae                                   |
| Otu3805 | 0       | 0       | 0       | 0        | 0       | 2        | 0         | 0         | 1         | 0         | 0         | 0         | Bacteria; Proteobacteria; Deltaproteobacteria; MIZ46                                                |
| Otu3012 | 1       | 0       | 2       | 1        | 0       | 1        | 0         | 1         | 0         | 1         | 0         | 1         | Bacteria; TM7; TM7-1                                                                                |
| Otu4229 | 0       | 0       | 0       | 0        | 0       | 0        | 0         | 0         | 1         | 0         | 0         | 2         | Bacteria; Proteobacteria; Deltaproteobacteria; MIZ46                                                |
| Otu4069 | 0       | 0       | 0       | 0        | 2       | 0        | 0         | 0         | 0         | 0         | 0         | 0         | Bacteria; Bacteroidetes                                                                             |
| Otu3011 | 0       | 2       | 0       | 0        | 0       | 0        | 0         | 0         | 0         | 0         | 0         | 0         | Bacteria                                                                                            |
| Otu4228 | 0       | 0       | 0       | 2        | 0       | 0        | 0         | 0         | 0         | 0         | 0         | 0         | Bacteria; Bacteroidetes; Sphingobacteria; Sphingobacteriales; Sphingobacteriaceae; Sphingobacterium |
| Otu2026 | 4       | 11      | 2       | 3        | 3       | 5        | 4         | 1         | 1         | 1         | 5         | 3         | Bacteria; Actinobacteria; Thermoleophilia; Gaiellales; Gaiellaceae                                  |
| Otu3010 | 8       | 43      | 7       | 6        | 27      | 4        | 18        | 11        | 4         | 18        | 17        | 8         | Bacteria; Verrucomicrobia; Spartobacteria; Chthoniobacteriales; Chthoniobacteraceae; DA101          |
| Otu3802 | 0       | 2       | 0       | 0        | 0       | 1        | 0         | 0         | 0         | 0         | 0         | 0         | Bacteria; Tenericutes; Mollicutes; Anaeroplasmatales; Anaeroplasmataceae; Asteroleplasma            |

| #OTU ID | Z31DRh1 | Z31DRh2 | Z31DRh3 | Z31DRh4r | Z31DRh5 | Z31DRh6r | Z31J1DRh1 | Z31J1DRh2 | Z31J1DRh3 | Z31J1DRh4 | Z31J1DRh5 | Z31J1DRh6 | taxonomy                                                                                              |
|---------|---------|---------|---------|----------|---------|----------|-----------|-----------|-----------|-----------|-----------|-----------|-------------------------------------------------------------------------------------------------------|
| Otu3803 | 0       | 0       | 0       | 0        | 2       | 2        | 1         | 0         | 0         | 0         | 0         | 0         | Bacteria; Chloroflexi; TK17; mle1-48                                                                  |
| Otu4395 | 0       | 0       | 0       | 2        | 0       | 0        | 0         | 0         | 0         | 0         | 0         | 0         | Bacteria; Acidobacteria; Solibacteres; Solibacterales                                                 |
| Otu4068 | 0       | 0       | 0       | 0        | 0       | 2        | 0         | 0         | 0         | 0         | 0         | 0         | Bacteria; Proteobacteria                                                                              |
| Otu4434 | 0       | 0       | 0       | 0        | 0       | 0        | 2         | 0         | 0         | 0         | 0         | 0         | Bacteria; Planctomycetes; Planctomycetia; Gemmatales; Gemmataceae                                     |
| Otu4164 | 0       | 2       | 1       | 1        | 0       | 0        | 0         | 0         | 1         | 0         | 0         | 0         | Bacteria; Actinobacteria; Acidimicrobia; Acidimicrobiales                                             |
| Otu3842 | 0       | 1       | 2       | 0        | 0       | 0        | 0         | 0         | 0         | 0         | 1         | 0         | Bacteria; Planctomycetes; Planctomycetia; Pirellulales; Pirellulaceae                                 |
| Otu61   | 0       | 0       | 0       | 0        | 0       | 0        | 4         | 0         | 0         | 2         | 286       | 4         | Bacteria; Proteobacteria; Gammaproteobacteria; Legionellales; Coxiellales; Aquicella                  |
| Otu60   | 209     | 274     | 315     | 497      | 192     | 778      | 359       | 330       | 322       | 301       | 391       | 348       | Bacteria; Proteobacteria; Betaproteobacteria; SC-I-84                                                 |
| Otu63   | 55      | 48      | 41      | 82       | 40      | 418      | 65        | 64        | 38        | 31        | 31        | 27        | Bacteria; Actinobacteria; Actinobacteria; Actinomycetales; Streptomycetaceae                          |
| Otu62   | 393     | 645     | 574     | 640      | 473     | 982      | 698       | 852       | 634       | 643       | 969       | 528       | Bacteria; Proteobacteria; Betaproteobacteria; Ellin6067                                               |
| Otu65   | 178     | 307     | 92      | 276      | 259     | 189      | 202       | 185       | 168       | 286       | 301       | 134       | Bacteria; Nitrospirae; Nitrospira; Nitrospirales; Nitrospiraceae; Nitrospira                          |
| Otu64   | 96      | 19      | 73      | 320      | 33      | 369      | 93        | 78        | 66        | 34        | 8         | 180       | Bacteria; Proteobacteria; Gammaproteobacteria; Xanthomonadales; Xanthomonadaceae                      |
| Otu67   | 145     | 119     | 128     | 171      | 162     | 443      | 261       | 349       | 225       | 297       | 207       | 122       | Bacteria; Acidobacteria; Acidobacteriia; Acidobacteriales; Koribacteraceae; Candidatus_Koribacter     |
| Otu66   | 43      | 72      | 77      | 149      | 77      | 279      | 110       | 198       | 145       | 78        | 145       | 74        | Bacteria; Gemmatimonadetes; Gemmatimonadetes; Ellin5290                                               |
| Otu69   | 68      | 128     | 79      | 129      | 76      | 279      | 80        | 156       | 106       | 267       | 63        | 35        | Bacteria; Acidobacteria; iii1-8; DS-18                                                                |
| Otu68   | 318     | 68      | 574     | 667      | 93      | 221      | 143       | 54        | 561       | 444       | 221       | 331       | Bacteria; Proteobacteria; Betaproteobacteria; Burkholderiales; Oxalobacteraceae; Cupriavidus          |
| Otu3018 | 0       | 0       | 0       | 0        | 0       | 0        | 0         | 0         | 0         | 0         | 0         | 2         | Bacteria; Verrucomicrobia; Verrucomicrobiae; Verrucomicrobiales; Verrucomicrobiaceae; Prosthecobacter |
| Otu4223 | 1       | 2       | 1       | 2        | 1       | 0        | 0         | 1         | 0         | 0         | 2         | 0         | Bacteria; Gemmatimonadetes; Gemmatimonadetes; Gemmatimonadales                                        |
| Otu4222 | 0       | 0       | 1       | 1        | 0       | 0        | 0         | 0         | 1         | 1         | 0         | 2         | Bacteria; TM7; TM7-1                                                                                  |
| Otu4435 | 0       | 0       | 0       | 0        | 0       | 2        | 0         | 0         | 0         | 0         | 0         | 0         | Bacteria; Planctomycetes; Phycisphaerae; Phycisphaerales                                              |
| Otu4225 | 0       | 0       | 0       | 0        | 0       | 3        | 0         | 1         | 0         | 0         | 0         | 0         | Bacteria                                                                                              |
| Otu3319 | 0       | 0       | 0       | 0        | 3       | 0        | 0         | 0         | 1         | 0         | 0         | 0         | Bacteria                                                                                              |

| #OTU ID | Z31DRh1 | Z31DRh2 | Z31DRh3 | Z31DRh4r | Z31DRh5 | Z31DRh6r | Z31J1DRh1 | Z31J1DRh2 | Z31J1DRh3 | Z31J1DRh4 | Z31J1DRh5 | Z31J1DRh6 | taxonomy                                                                                     |
|---------|---------|---------|---------|----------|---------|----------|-----------|-----------|-----------|-----------|-----------|-----------|----------------------------------------------------------------------------------------------|
| Otu3098 | 0       | 0       | 0       | 2        | 1       | 2        | 0         | 0         | 2         | 1         | 4         | 1         | Bacteria; TM7; SC3                                                                           |
| Otu4224 | 2       | 0       | 0       | 0        | 0       | 2        | 0         | 0         | 2         | 0         | 0         | 0         | Bacteria; Proteobacteria; Gammaproteobacteria; Xanthomonadales; Sinobacteraceae              |
| Otu2094 | 0       | 0       | 0       | 0        | 0       | 0        | 0         | 0         | 0         | 0         | 3         | 0         | Bacteria; OD1; ZB2                                                                           |
| Otu2095 | 0       | 1       | 1       | 2        | 0       | 5        | 2         | 3         | 3         | 1         | 2         | 0         | Bacteria; Proteobacteria; Alphaproteobacteria                                                |
| Otu2096 | 0       | 0       | 0       | 3        | 2       | 5        | 0         | 0         | 0         | 0         | 0         | 0         | Bacteria; Proteobacteria; Gammaproteobacteria; Legionellales; Legionellaceae                 |
| Otu2097 | 2       | 1       | 0       | 5        | 0       | 0        | 0         | 0         | 0         | 0         | 0         | 1         | Bacteria; Proteobacteria                                                                     |
| Otu2090 | 11      | 12      | 5       | 11       | 7       | 19       | 12        | 15        | 16        | 14        | 10        | 11        | Bacteria; Proteobacteria; Deltaproteobacteria; Myxococcales                                  |
| Otu2091 | 2       | 2       | 0       | 3        | 0       | 3        | 1         | 3         | 0         | 1         | 1         | 0         | Bacteria; Armatimonadetes; Armatimonadia; Armatimonadales; Armatimonadaceae                  |
| Otu2092 | 0       | 0       | 0       | 0        | 0       | 0        | 0         | 0         | 0         | 3         | 0         | 0         | Bacteria; Proteobacteria; Gammaproteobacteria; Legionellales                                 |
| Otu2093 | 0       | 0       | 2       | 1        | 1       | 0        | 0         | 1         | 1         | 0         | 4         | 2         | Bacteria; OD1; ZB2                                                                           |
| Otu4226 | 2       | 1       | 0       | 1        | 2       | 5        | 2         | 1         | 1         | 2         | 3         | 3         | Bacteria; Proteobacteria; Deltaproteobacteria; MIZ46                                         |
| Otu2098 | 0       | 3       | 0       | 0        | 0       | 0        | 0         | 0         | 0         | 0         | 0         | 0         | Bacteria; Bacteroidetes; Flavobacteriia; Flavobacteriales; Flavobacteriaceae; Flavobacterium |
| Otu2099 | 2       | 1       | 0       | 0        | 0       | 0        | 0         | 2         | 0         | 4         | 3         | 0         | Bacteria; Proteobacteria; Gammaproteobacteria; Legionellales                                 |
| Otu4023 | 0       | 0       | 0       | 0        | 2       | 0        | 0         | 0         | 0         | 0         | 0         | 0         | Bacteria; Proteobacteria                                                                     |
| Otu4022 | 0       | 0       | 0       | 0        | 0       | 0        | 0         | 0         | 0         | 2         | 0         | 0         | Bacteria                                                                                     |
| Otu4021 | 0       | 0       | 0       | 2        | 0       | 0        | 0         | 1         | 0         | 0         | 0         | 0         | Bacteria; Proteobacteria; Gammaproteobacteria; Legionellales; Coxiellaceae                   |
| Otu4020 | 1       | 2       | 0       | 0        | 0       | 2        | 1         | 1         | 0         | 1         | 0         | 0         | Bacteria; Proteobacteria; Alphaproteobacteria; Rhizobiales; Beijerinckiaceae                 |
| Otu4027 | 11      | 14      | 2       | 5        | 6       | 7        | 0         | 5         | 3         | 1         | 0         | 2         | Bacteria; Bacteroidetes; Sphingobacteriia; Sphingobacteriales                                |
| Otu4026 | 0       | 2       | 0       | 0        | 0       | 0        | 0         | 0         | 0         | 1         | 2         | 0         | Bacteria; Proteobacteria; Deltaproteobacteria; Myxococcales                                  |
| Otu4025 | 0       | 0       | 2       | 0        | 0       | 0        | 0         | 1         | 0         | 0         | 0         | 0         | Bacteria; Chlamydiae; Chlamydiia; Chlamydiales                                               |
| Otu4024 | 0       | 1       | 0       | 2        | 1       | 0        | 0         | 0         | 0         | 1         | 0         | 0         | Bacteria; Firmicutes; Clostridia; Clostridiales; Gracilibacteraceae                          |
| Otu4029 | 0       | 0       | 2       | 3        | 0       | 1        | 1         | 0         | 0         | 1         | 1         | 1         | Bacteria; Firmicutes; Bacilli; Bacillales; Paenibacillaceae; Paenibacillus                   |

| #OTU ID | Z31DRh1 | Z31DRh2 | Z31DRh3 | Z31DRh4r | Z31DRh5 | Z31DRh6r | Z31J1DRh1 | Z31J1DRh2 | Z31J1DRh3 | Z31J1DRh4 | Z31J1DRh5 | Z31J1DRh6 | taxonomy                                                                                                                       |
|---------|---------|---------|---------|----------|---------|----------|-----------|-----------|-----------|-----------|-----------|-----------|--------------------------------------------------------------------------------------------------------------------------------|
| Otu4028 | 0       | 0       | 0       | 1        | 2       | 0        | 0         | 0         | 0         | 0         | 3         | 0         | Bacteria; Chloroflexi; Anaerolineae; A31                                                                                       |
| Otu2604 | 0       | 2       | 0       | 0        | 0       | 0        | 0         | 0         | 0         | 0         | 0         | 0         | Bacteria                                                                                                                       |
| Otu1040 | 0       | 0       | 0       | 0        | 1       | 2        | 10        | 0         | 0         | 0         | 1         | 0         | Bacteria                                                                                                                       |
| Otu4162 | 0       | 0       | 1       | 0        | 0       | 2        | 1         | 3         | 0         | 0         | 0         | 0         | Bacteria; Planctomycetes; Planctomycetia; Gemmatales; Gemmataceae                                                              |
| Otu1041 | 0       | 5       | 3       | 2        | 2       | 0        | 1         | 3         | 1         | 18        | 0         | 1         | Bacteria; Actinobacteria; Actinobacteria; Actinomycetales; Micromonosporaceae                                                  |
| Otu197  | 55      | 28      | 33      | 33       | 51      | 109      | 32        | 82        | 97        | 63        | 79        | 53        | Bacteria; Chloroflexi; Ktedonobacteria; JG30-KF-AS9                                                                            |
| Otu4310 | 0       | 0       | 0       | 0        | 0       | 0        | 0         | 0         | 0         | 0         | 2         | 0         | Bacteria; Cyanobacteria; Chloroplast; Chlorophyta; Chlamydomonadales                                                           |
| Otu4437 | 0       | 0       | 0       | 0        | 0       | 0        | 2         | 0         | 0         | 0         | 0         | 0         | Bacteria; OP11; OP11-4                                                                                                         |
| Otu1208 | 363     | 27      | 17      | 401      | 90      | 581      | 15        | 13        | 33        | 28        | 4         | 13        | Bacteria; Bacteroidetes; Saprospirae; Saprospirales; Chitinophagaceae; Chitinophaga                                            |
| Otu1209 | 0       | 0       | 0       | 0        | 11      | 0        | 0         | 0         | 0         | 0         | 0         | 0         | Bacteria; Proteobacteria; Alphaproteobacteria; Rhodospirillales; Rhodospirillaceae; Azospirillum; Azospirillum_irakense        |
| Otu1204 | 6       | 19      | 6       | 38       | 19      | 33       | 17        | 16        | 8         | 9         | 20        | 3         | Bacteria; Acidobacteria; Acidobacteriia; Acidobacteriales; Koribacteraceae                                                     |
| Otu1205 | 3       | 2       | 0       | 14       | 3       | 3        | 2         | 0         | 1         | 6         | 1         | 0         | Bacteria; Bacteroidetes; Saprospirae; Saprospirales; Chitinophagaceae                                                          |
| Otu1206 | 2       | 15      | 2       | 8        | 4       | 8        | 8         | 3         | 6         | 11        | 7         | 2         | Bacteria; Proteobacteria; Betaproteobacteria                                                                                   |
| Otu1207 | 0       | 2       | 1       | 0        | 4       | 16       | 2         | 1         | 4         | 0         | 1         | 0         | Bacteria; Elusimicrobia; Elusimicrobia; IIb                                                                                    |
| Otu1200 | 3       | 2       | 1       | 14       | 0       | 6        | 0         | 7         | 0         | 0         | 0         | 2         | Bacteria; Proteobacteria; Deltaproteobacteria; Bdellovibrionales; Bdellovibrionaceae; Bdellovibrio; Bdellovibrio_bacteriovorus |
| Otu1201 | 4       | 0       | 1       | 1        | 1       | 9        | 1         | 1         | 0         | 3         | 1         | 1         | Bacteria; Proteobacteria; Gammaproteobacteria                                                                                  |
| Otu1202 | 0       | 0       | 3       | 4        | 3       | 17       | 1         | 3         | 1         | 1         | 2         | 5         | Bacteria; Chloroflexi; Ktedonobacteria; Ktedonobacteriales; Ktedonobacteraceae                                                 |
| Otu1203 | 1       | 4       | 2       | 4        | 2       | 2        | 3         | 0         | 3         | 2         | 8         | 0         | Bacteria                                                                                                                       |
| Otu4163 | 0       | 0       | 0       | 0        | 1       | 0        | 2         | 0         | 2         | 0         | 0         | 0         | Bacteria; Proteobacteria; Gammaproteobacteria; Legionellales                                                                   |
| Otu2898 | 0       | 0       | 2       | 0        | 0       | 0        | 0         | 0         | 0         | 0         | 0         | 0         | Bacteria                                                                                                                       |
| Otu2899 | 0       | 1       | 0       | 0        | 0       | 0        | 1         | 0         | 0         | 0         | 2         | 0         | Bacteria; Chloroflexi; Chloroflexi; Roseiflexales                                                                              |
| Otu2894 | 0       | 0       | 0       | 0        | 0       | 1        | 0         | 0         | 0         | 0         | 0         | 2         | Bacteria; Proteobacteria; Gammaproteobacteria; Legionellales                                                                   |

| #OTU ID | Z31DRh1 | Z31DRh2 | Z31DRh3 | Z31DRh4r | Z31DRh5 | Z31DRh6r | Z31J1DRh1 | Z31J1DRh2 | Z31J1DRh3 | Z31J1DRh4 | Z31J1DRh5 | Z31J1DRh6 | taxonomy                                                                                           |
|---------|---------|---------|---------|----------|---------|----------|-----------|-----------|-----------|-----------|-----------|-----------|----------------------------------------------------------------------------------------------------|
| Otu2895 | 0       | 0       | 0       | 0        | 0       | 2        | 0         | 0         | 0         | 0         | 0         | 0         | Bacteria; Planctomycetes; Planctomycetia; Gemmatales; Gemmataceae                                  |
| Otu2896 | 0       | 0       | 0       | 2        | 0       | 0        | 0         | 0         | 0         | 0         | 0         | 0         | Bacteria; Bacteroidetes; Saprospirae; Saprospirales; Chitinophagaceae                              |
| Otu2897 | 0       | 0       | 0       | 0        | 0       | 2        | 0         | 0         | 0         | 0         | 0         | 0         | Bacteria                                                                                           |
| Otu2890 | 1       | 0       | 0       | 2        | 1       | 1        | 0         | 0         | 1         | 0         | 1         | 0         | Bacteria; Actinobacteria; Acidimicrobia; Acidimicrobiales; C111                                    |
| Otu1048 | 5       | 5       | 2       | 8        | 4       | 16       | 3         | 15        | 4         | 3         | 6         | 2         | Bacteria; Chloroflexi; Ktedonobacteria                                                             |
| Otu2892 | 0       | 3       | 1       | 0        | 1       | 2        | 0         | 1         | 0         | 0         | 1         | 0         | Bacteria; Chloroflexi; Anaerolineae; SBR1031; oc28                                                 |
| Otu2893 | 0       | 1       | 0       | 2        | 1       | 6        | 4         | 0         | 2         | 0         | 2         | 0         | Bacteria; Proteobacteria; Deltaproteobacteria; Bdellovibrionales; Bdellovibrionaceae; Bdellovibrio |
| Otu4430 | 0       | 9       | 0       | 6        | 6       | 26       | 3         | 7         | 10        | 1         | 18        | 2         | Bacteria; Verrucomicrobia; Pedosphaerae; Pedosphaerales; Ellin515                                  |
| Otu1049 | 29      | 38      | 43      | 55       | 15      | 32       | 42        | 41        | 34        | 46        | 44        | 9         | Bacteria; Proteobacteria; Alphaproteobacteria; Sphingomonadales; Sphingomonadaceae                 |
| Otu3699 | 0       | 0       | 0       | 0        | 2       | 0        | 0         | 0         | 0         | 0         | 0         | 0         | Bacteria; Proteobacteria; Alphaproteobacteria; Rhodospirillales; Rhodospirillaceae                 |
| Otu3698 | 0       | 2       | 0       | 0        | 0       | 0        | 0         | 0         | 0         | 0         | 1         | 0         | Bacteria; Elusimicrobia; Endomicrobia                                                              |
| Otu3695 | 0       | 0       | 0       | 0        | 2       | 0        | 0         | 0         | 0         | 0         | 0         | 0         | Bacteria; Proteobacteria                                                                           |
| Otu3694 | 0       | 0       | 1       | 1        | 1       | 3        | 0         | 0         | 0         | 0         | 0         | 0         | Bacteria; Actinobacteria; Thermoleophilia; Gaiellales                                              |
| Otu3697 | 0       | 0       | 0       | 2        | 0       | 0        | 0         | 0         | 0         | 0         | 0         | 0         | Bacteria; Bacteroidetes                                                                            |
| Otu3696 | 0       | 0       | 0       | 0        | 0       | 0        | 2         | 0         | 0         | 0         | 0         | 0         | Bacteria; Proteobacteria; Deltaproteobacteria; Syntrophobacteriales; Syntrophobacteraceae          |
| Otu3691 | 0       | 0       | 0       | 0        | 0       | 0        | 0         | 0         | 0         | 2         | 0         | 0         | Bacteria; Proteobacteria; Deltaproteobacteria; Bdellovibrionales; Bdellovibrionaceae               |
| Otu3690 | 0       | 2       | 0       | 0        | 0       | 0        | 0         | 0         | 0         | 0         | 0         | 0         | Bacteria; Chlamydiae; Chlamydia; Chlamydiales; Simkaniaceae                                        |
| Otu3693 | 2       | 3       | 4       | 5        | 1       | 0        | 1         | 2         | 0         | 1         | 0         | 0         | Bacteria; Bacteroidetes                                                                            |
| Otu3692 | 0       | 0       | 0       | 0        | 0       | 0        | 0         | 2         | 0         | 0         | 0         | 0         | Bacteria; Proteobacteria; Alphaproteobacteria; Rickettsiales; mitochondria                         |
| Otu1935 | 0       | 5       | 0       | 0        | 0       | 0        | 0         | 0         | 0         | 0         | 0         | 0         | Bacteria; Bacteroidetes; Flavobacteriia; Flavobacteriales; Cryomorphaeae; Crocinitomix             |
| Otu3191 | 0       | 0       | 0       | 0        | 0       | 0        | 0         | 0         | 0         | 0         | 0         | 2         | Bacteria                                                                                           |
| Otu3459 | 0       | 4       | 0       | 0        | 2       | 0        | 0         | 0         | 0         | 1         | 1         | 0         | Bacteria; Gemmatimonadetes; Gemm-1                                                                 |

| #OTU ID | Z31DRh1 | Z31DRh2 | Z31DRh3 | Z31DRh4r | Z31DRh5 | Z31DRh6r | Z31J1DRh1 | Z31J1DRh2 | Z31J1DRh3 | Z31J1DRh4 | Z31J1DRh5 | Z31J1DRh6 | taxonomy                                                                                           |
|---------|---------|---------|---------|----------|---------|----------|-----------|-----------|-----------|-----------|-----------|-----------|----------------------------------------------------------------------------------------------------|
| Otu3458 | 77      | 116     | 119     | 274      | 178     | 612      | 189       | 458       | 363       | 266       | 259       | 238       | Bacteria; Acidobacteria; Acidobacteriia; Acidobacteriales; Koribacteraceae; Candidatus_Koribacter  |
| Otu3457 | 2       | 5       | 0       | 1        | 2       | 2        | 1         | 0         | 2         | 2         | 1         | 4         | Bacteria; Chloroflexi; TK10; AKYG885; Dolo_23                                                      |
| Otu3456 | 0       | 0       | 0       | 0        | 0       | 0        | 0         | 2         | 0         | 0         | 0         | 0         | Bacteria                                                                                           |
| Otu3455 | 0       | 0       | 5       | 4        | 2       | 1        | 1         | 2         | 4         | 3         | 2         | 6         | Bacteria; Gemmatimonadetes; Gemmatimonadetes                                                       |
| Otu3454 | 4       | 3       | 0       | 6        | 2       | 11       | 3         | 10        | 10        | 6         | 6         | 3         | Bacteria; Planctomycetes; BD7-11                                                                   |
| Otu3453 | 0       | 0       | 0       | 1        | 0       | 2        | 0         | 2         | 1         | 0         | 1         | 0         | Bacteria; Planctomycetes; Planctomycetia; Gemmatales; Gemmataceae                                  |
| Otu3452 | 0       | 0       | 0       | 0        | 0       | 0        | 0         | 0         | 2         | 0         | 0         | 0         | Bacteria; Proteobacteria; Betaproteobacteria                                                       |
| Otu3451 | 0       | 0       | 0       | 0        | 2       | 0        | 0         | 0         | 0         | 1         | 0         | 0         | Bacteria; Proteobacteria; Gammaproteobacteria; Legionellales                                       |
| Otu3450 | 0       | 2       | 0       | 0        | 0       | 2        | 0         | 0         | 0         | 0         | 0         | 0         | Bacteria; Proteobacteria; Deltaproteobacteria; Syntrophobacteriales; Syntrophobacteraceae          |
| Otu4161 | 0       | 0       | 2       | 0        | 0       | 0        | 0         | 0         | 0         | 1         | 0         | 0         | Bacteria; Planctomycetes; Phycisphaerae; Phycisphaerales                                           |
| Otu1338 | 1       | 1       | 1       | 1        | 0       | 9        | 1         | 0         | 3         | 3         | 3         | 0         | Bacteria; Armatimonadetes; Chthonomonadetes; Chthonomonadales; Chthonomonadaceae                   |
| Otu1339 | 0       | 3       | 0       | 3        | 10      | 3        | 2         | 2         | 0         | 5         | 9         | 1         | Bacteria; OP3; PBS-25                                                                              |
| Otu1330 | 11      | 3       | 8       | 3        | 1       | 17       | 3         | 4         | 1         | 4         | 0         | 1         | Bacteria; Proteobacteria; Gammaproteobacteria; Xanthomonadales; Xanthomonadaceae                   |
| Otu1331 | 0       | 4       | 0       | 0        | 0       | 11       | 0         | 1         | 1         | 0         | 1         | 0         | Bacteria; Proteobacteria; Deltaproteobacteria; Myxococcales                                        |
| Otu1332 | 2       | 1       | 4       | 5        | 1       | 7        | 0         | 0         | 3         | 0         | 1         | 0         | Bacteria; Proteobacteria; Deltaproteobacteria; Bdellovibrionales; Bdellovibrionaceae; Bdellovibrio |
| Otu1333 | 4       | 1       | 5       | 2        | 1       | 4        | 3         | 1         | 2         | 8         | 5         | 3         | Bacteria; Gemmatimonadetes; Gemmatimonadetes; Gemmatimonadales; Ellin5301                          |
| Otu1334 | 8       | 5       | 5       | 3        | 2       | 2        | 4         | 2         | 1         | 5         | 5         | 1         | Bacteria; Gemmatimonadetes; Gemmatimonadetes                                                       |
| Otu1335 | 0       | 2       | 0       | 1        | 0       | 7        | 0         | 0         | 0         | 0         | 0         | 0         | Bacteria; Proteobacteria; Alphaproteobacteria; Rickettsiales; mitochondria                         |
| Otu1336 | 0       | 0       | 0       | 2        | 0       | 0        | 1         | 0         | 6         | 2         | 3         | 0         | Bacteria                                                                                           |
| Otu1337 | 0       | 6       | 8       | 0        | 0       | 3        | 3         | 0         | 0         | 0         | 4         | 0         | Bacteria; Acidobacteria; Solibacteres; Solibacterales                                              |
| Otu2670 | 1       | 1       | 1       | 2        | 0       | 0        | 0         | 1         | 1         | 0         | 2         | 0         | Bacteria; Proteobacteria; Deltaproteobacteria; MIZ46                                               |
| Otu2671 | 2       | 2       | 1       | 0        | 0       | 2        | 1         | 0         | 0         | 1         | 2         | 0         | Bacteria; Proteobacteria; Deltaproteobacteria; Entotheonellales; Entotheonellaceae                 |

| #OTU ID | Z31DRh1 | Z31DRh2 | Z31DRh3 | Z31DRh4r | Z31DRh5 | Z31DRh6r | Z31J1DRh1 | Z31J1DRh2 | Z31J1DRh3 | Z31J1DRh4 | Z31J1DRh5 | Z31J1DRh6 | taxonomy                                                                                    |
|---------|---------|---------|---------|----------|---------|----------|-----------|-----------|-----------|-----------|-----------|-----------|---------------------------------------------------------------------------------------------|
| Otu2672 | 0       | 0       | 1       | 1        | 0       | 2        | 0         | 0         | 0         | 2         | 2         | 0         | Bacteria; Actinobacteria; Acidimicrobia; Acidimicrobiales; EB1017                           |
| Otu2673 | 0       | 1       | 0       | 2        | 0       | 2        | 0         | 0         | 0         | 0         | 0         | 0         | Bacteria; Bacteroidetes; Saprospirae; Saprospirales; Chitinophagaceae                       |
| Otu2674 | 0       | 0       | 0       | 0        | 4       | 1        | 0         | 0         | 0         | 0         | 0         | 0         | Bacteria; Actinobacteria; MB-A2-108; 0319-7L14                                              |
| Otu2675 | 1       | 4       | 3       | 1        | 1       | 4        | 1         | 2         | 0         | 2         | 0         | 1         | Bacteria; Armatimonadetes; OPB50                                                            |
| Otu2676 | 0       | 0       | 0       | 0        | 0       | 0        | 0         | 2         | 0         | 0         | 0         | 0         | Bacteria                                                                                    |
| Otu2677 | 0       | 0       | 2       | 0        | 0       | 2        | 0         | 0         | 0         | 1         | 0         | 0         | Bacteria; Firmicutes; Bacilli; Bacillales; Paenibacillaceae; Paenibacillus                  |
| Otu2678 | 51      | 146     | 44      | 126      | 47      | 42       | 40        | 22        | 6         | 30        | 37        | 9         | Bacteria; Acidobacteria; Chloracidobacteria; RB41                                           |
| Otu2679 | 12      | 1       | 10      | 16       | 8       | 21       | 7         | 1         | 5         | 6         | 2         | 1         | Bacteria; Actinobacteria; Actinobacteria; Actinomycetales; Micromonosporaceae; Actinoplanes |
| Otu4166 | 0       | 2       | 0       | 0        | 0       | 1        | 1         | 0         | 0         | 0         | 0         | 0         | Bacteria; Proteobacteria; Gammaproteobacteria                                               |
| Otu3861 | 0       | 0       | 0       | 0        | 0       | 0        | 0         | 2         | 0         | 0         | 0         | 0         | Bacteria; Chlorobi                                                                          |
| Otu4158 | 1       | 0       | 1       | 0        | 0       | 2        | 1         | 0         | 0         | 0         | 0         | 0         | Bacteria; Proteobacteria; Alphaproteobacteria                                               |
| Otu3447 | 0       | 0       | 0       | 5        | 0       | 0        | 0         | 0         | 0         | 0         | 1         | 0         | Bacteria; Proteobacteria; Alphaproteobacteria; Caulobacterales; Caulobacteraceae            |
| Otu4153 | 0       | 0       | 0       | 0        | 1       | 0        | 0         | 0         | 1         | 0         | 3         | 0         | Bacteria; Firmicutes; Bacilli; Bacillales                                                   |
| Otu4152 | 0       | 0       | 0       | 0        | 0       | 0        | 0         | 0         | 0         | 2         | 0         | 0         | Bacteria; Cyanobacteria; Chloroplast; Chlorophyta; Chlamydomonadaceae                       |
| Otu4151 | 0       | 0       | 0       | 0        | 0       | 2        | 0         | 2         | 0         | 2         | 0         | 1         | Bacteria; Verrucomicrobia; Opiritatae; Opiritatales; Opiritataceae; Opiritatus              |
| Otu1939 | 0       | 2       | 0       | 1        | 2       | 4        | 3         | 0         | 1         | 2         | 5         | 0         | Bacteria; Chlamydiae; Chlamydia; Chlamydiales; Rhabdochlamydiae; Candidatus_Rhabdochlamydia |
| Otu4157 | 0       | 2       | 0       | 0        | 1       | 3        | 1         | 0         | 0         | 0         | 1         | 0         | Bacteria; Planctomycetes; Planctomycetia; Pirellulales; Pirellulaceae                       |
| Otu4156 | 0       | 1       | 1       | 2        | 2       | 0        | 0         | 0         | 0         | 0         | 0         | 0         | Bacteria; Armatimonadetes; Chthonomonadetes; SJA-22                                         |
| Otu4155 | 0       | 2       | 0       | 0        | 0       | 0        | 0         | 0         | 0         | 0         | 1         | 1         | Bacteria; Actinobacteria; Actinobacteria; Actinomycetales; Streptomycetaceae                |
| Otu4154 | 0       | 0       | 0       | 0        | 0       | 2        | 0         | 0         | 0         | 0         | 0         | 0         | Bacteria; Acidobacteria                                                                     |
| Otu789  | 9       | 11      | 4       | 12       | 7       | 6        | 9         | 13        | 20        | 8         | 14        | 4         | Bacteria; Chlorobi                                                                          |
| Otu788  | 27      | 23      | 27      | 25       | 13      | 45       | 17        | 7         | 9         | 13        | 18        | 7         | Bacteria; Planctomycetes; Phycisphaerae; WD2101                                             |



| #OTU ID | Z31DRh1 | Z31DRh2 | Z31DRh3 | Z31DRh4r | Z31DRh5 | Z31DRh6r | Z31J1DRh1 | Z31J1DRh2 | Z31J1DRh3 | Z31J1DRh4 | Z31J1DRh5 | Z31J1DRh6 | taxonomy                                                                                     |
|---------|---------|---------|---------|----------|---------|----------|-----------|-----------|-----------|-----------|-----------|-----------|----------------------------------------------------------------------------------------------|
| Otu3137 | 0       | 0       | 0       | 0        | 0       | 0        | 0         | 0         | 2         | 0         | 0         | 0         | Bacteria; Proteobacteria                                                                     |
| Otu783  | 20      | 6       | 10      | 8        | 16      | 27       | 7         | 11        | 17        | 17        | 6         | 7         | Bacteria; BRC1; PRR-11                                                                       |
| Otu782  | 6       | 17      | 12      | 12       | 4       | 11       | 5         | 10        | 12        | 4         | 12        | 0         | Bacteria; Chloroflexi; C0119                                                                 |
| Otu781  | 0       | 2       | 2       | 7        | 3       | 10       | 12        | 15        | 7         | 3         | 7         | 1         | Bacteria; Proteobacteria; Alphaproteobacteria; Rhodospirillales; Acetobacteraceae            |
| Otu780  | 7       | 2       | 1       | 12       | 1       | 14       | 4         | 5         | 3         | 0         | 2         | 6         | Bacteria; Planctomycetes; Planctomycetia; Planctomycetales; Planctomycetaceae; Planctomyces  |
| Otu787  | 1       | 1       | 0       | 2        | 1       | 16       | 0         | 4         | 7         | 0         | 0         | 7         | Bacteria; Planctomycetes; Planctomycetia; Planctomycetales; Planctomycetaceae; Planctomyces  |
| Otu786  | 5       | 7       | 1       | 11       | 5       | 21       | 9         | 4         | 5         | 4         | 12        | 2         | Bacteria; Planctomycetes; Planctomycetia; Pirellulales; Pirellulaceae                        |
| Otu785  | 7       | 4       | 9       | 7        | 3       | 12       | 7         | 1         | 7         | 7         | 2         | 17        | Bacteria; Proteobacteria; Alphaproteobacteria; Rhizobiales                                   |
| Otu784  | 9       | 12      | 7       | 11       | 9       | 17       | 9         | 2         | 2         | 6         | 12        | 4         | Bacteria; Acidobacteria; Acidobacteria-6; iii1-15                                            |
| Otu1024 | 8       | 4       | 0       | 11       | 1       | 11       | 4         | 4         | 4         | 9         | 0         | 1         | Bacteria; Acidobacteria; Chloracidobacteria; RB41; Ellin6075                                 |
| Otu1025 | 1       | 2       | 3       | 1        | 5       | 1        | 14        | 9         | 19        | 0         | 1         | 7         | Bacteria                                                                                     |
| Otu1026 | 0       | 0       | 0       | 0        | 2       | 1        | 8         | 0         | 1         | 2         | 14        | 3         | Bacteria; Proteobacteria; Gammaproteobacteria; Legionellales; Coxiellaceae; Aquicella        |
| Otu1027 | 6       | 4       | 4       | 7        | 2       | 11       | 19        | 73        | 5         | 9         | 3         | 4         | Bacteria; TM7; TM7-1                                                                         |
| Otu1020 | 11      | 22      | 14      | 36       | 6       | 21       | 23        | 3         | 54        | 7         | 3         | 32        | Bacteria; Proteobacteria; Gammaproteobacteria; Xanthomonadales; Xanthomonadaceae; Dokdonella |
| Otu1021 | 0       | 5       | 1       | 0        | 2       | 7        | 18        | 3         | 2         | 0         | 4         | 1         | Bacteria; Proteobacteria; Alphaproteobacteria; Caulobacteriales; Caulobacteraceae            |
| Otu1022 | 3       | 3       | 0       | 0        | 0       | 1        | 7         | 17        | 2         | 1         | 3         | 4         | Bacteria; Proteobacteria; Alphaproteobacteria; Ellin329                                      |
| Otu1023 | 3       | 12      | 4       | 5        | 3       | 14       | 6         | 6         | 8         | 3         | 4         | 4         | Bacteria; Actinobacteria; Thermoleophilia; Gaiellales; Gaiellaceae                           |
| Otu545  | 22      | 17      | 19      | 24       | 14      | 25       | 19        | 35        | 27        | 26        | 16        | 22        | Bacteria; Proteobacteria; Deltaproteobacteria; Myxococcales; Haliangiaceae                   |
| Otu544  | 29      | 51      | 12      | 10       | 14      | 53       | 24        | 9         | 0         | 11        | 18        | 5         | Bacteria; Acidobacteria; Chloracidobacteria; RB41; Ellin6075                                 |
| Otu547  | 6       | 34      | 6       | 22       | 14      | 25       | 6         | 32        | 18        | 10        | 24        | 9         | Bacteria; Chlorobi                                                                           |
| Otu546  | 2       | 4       | 1       | 2        | 1       | 0        | 5         | 4         | 0         | 0         | 35        | 0         | Bacteria; Planctomycetes; vadinHA49; DH61                                                    |
| Otu1028 | 4       | 2       | 1       | 1        | 3       | 3        | 9         | 15        | 3         | 2         | 0         | 0         | Bacteria; TM7; SC3                                                                           |

| #OTU ID | Z31DRh1 | Z31DRh2 | Z31DRh3 | Z31DRh4r | Z31DRh5 | Z31DRh6r | Z31J1DRh1 | Z31J1DRh2 | Z31J1DRh3 | Z31J1DRh4 | Z31J1DRh5 | Z31J1DRh6 | taxonomy                                                                                                                       |
|---------|---------|---------|---------|----------|---------|----------|-----------|-----------|-----------|-----------|-----------|-----------|--------------------------------------------------------------------------------------------------------------------------------|
| Otu1029 | 0       | 0       | 0       | 0        | 1       | 13       | 2         | 0         | 0         | 6         | 1         | 0         | Bacteria; Cyanobacteria; 4C0d-2; MLE1-12                                                                                       |
| Otu543  | 3       | 1       | 1       | 5        | 26      | 1        | 1         | 0         | 2         | 1         | 14        | 0         | Bacteria; ODI; SM2F11                                                                                                          |
| Otu542  | 27      | 10      | 29      | 25       | 7       | 39       | 16        | 22        | 17        | 12        | 5         | 8         | Bacteria; Proteobacteria; Deltaproteobacteria; Myxococcales                                                                    |
| Otu765  | 2       | 8       | 8       | 22       | 1       | 6        | 1         | 5         | 5         | 3         | 0         | 0         | Bacteria; Proteobacteria; Deltaproteobacteria; Myxococcales; 0319-6G20                                                         |
| Otu764  | 12      | 18      | 6       | 6        | 15      | 22       | 12        | 7         | 11        | 6         | 2         | 3         | Bacteria; Chloroflexi; Chloroflexi; Roseiflexales; Kouleothrixaceae                                                            |
| Otu943  | 3       | 8       | 10      | 3        | 1       | 19       | 3         | 5         | 9         | 7         | 10        | 4         | Bacteria; Proteobacteria; Deltaproteobacteria; Myxococcales                                                                    |
| Otu766  | 0       | 15      | 0       | 0        | 0       | 0        | 1         | 0         | 0         | 0         | 0         | 0         | Bacteria; TM6; SJA-4                                                                                                           |
| Otu945  | 3       | 0       | 14      | 5        | 0       | 0        | 0         | 0         | 1         | 0         | 0         | 0         | Bacteria; Verrucomicrobia; Spartobacteria; Chthoniobacteriales; Chthoniobacteraceae                                            |
| Otu760  | 15      | 15      | 10      | 23       | 13      | 42       | 14        | 23        | 15        | 10        | 6         | 9         | Bacteria; Planctomycetes; Planctomycetia; Gemmatales; Gemmataceae; Gemmata                                                     |
| Otu947  | 0       | 0       | 2       | 1        | 3       | 0        | 0         | 0         | 1         | 0         | 16        | 3         | Bacteria; Proteobacteria; Gammaproteobacteria; Legionellales; Coxiellaceae                                                     |
| Otu946  | 0       | 0       | 1       | 12       | 3       | 13       | 0         | 1         | 2         | 4         | 0         | 5         | Bacteria; Proteobacteria; Deltaproteobacteria; Bdellovibrionales; Bdellovibrionaceae; Bdellovibrio; Bdellovibrio_bacteriovorus |
| Otu949  | 9       | 16      | 4       | 10       | 8       | 10       | 3         | 8         | 3         | 4         | 22        | 3         | Bacteria; Proteobacteria; Betaproteobacteria                                                                                   |
| Otu948  | 0       | 0       | 0       | 3        | 3       | 16       | 0         | 0         | 7         | 0         | 0         | 0         | Bacteria; Acidobacteria; Solibacteres; Solibacterales                                                                          |
| Otu3274 | 6       | 4       | 3       | 6        | 8       | 10       | 8         | 4         | 5         | 12        | 12        | 6         | Bacteria; Acidobacteria; Solibacteres; Solibacterales; Solibacteraceae; Candidatus_Solibacter                                  |
| Otu769  | 0       | 0       | 0       | 0        | 0       | 24       | 0         | 0         | 0         | 0         | 0         | 0         | Bacteria; Bacteroidetes; Saprospirae; Saprospirales; Chitinophagaceae                                                          |
| Otu768  | 7       | 21      | 7       | 14       | 17      | 17       | 25        | 0         | 0         | 13        | 16        | 3         | Bacteria; Bacteroidetes; Sphingobacteriia; Sphingobacteriales                                                                  |
| Otu3075 | 0       | 2       | 0       | 0        | 0       | 0        | 0         | 0         | 0         | 0         | 0         | 0         | Bacteria; Acidobacteria; Chloracidobacteria; RB41                                                                              |
| Otu3074 | 0       | 0       | 0       | 0        | 1       | 0        | 0         | 2         | 0         | 0         | 0         | 0         | Bacteria; Proteobacteria; Gammaproteobacteria; Legionellales                                                                   |
| Otu3077 | 0       | 0       | 0       | 1        | 0       | 0        | 0         | 0         | 0         | 0         | 0         | 2         | Bacteria; Actinobacteria; Acidimicrobiia; Acidimicrobiales                                                                     |
| Otu3071 | 12      | 8       | 4       | 4        | 1       | 9        | 3         | 5         | 7         | 1         | 5         | 5         | Bacteria; Proteobacteria; Deltaproteobacteria; Myxococcales                                                                    |
| Otu3070 | 0       | 0       | 0       | 3        | 0       | 0        | 0         | 0         | 0         | 0         | 0         | 0         | Bacteria; Planctomycetes; Planctomycetia; Gemmatales; Gemmataceae; Gemmata                                                     |
| Otu3073 | 0       | 0       | 0       | 1        | 1       | 3        | 0         | 2         | 2         | 1         | 2         | 0         | Bacteria; Actinobacteria; Acidimicrobiia; Acidimicrobiales                                                                     |

| #OTU ID | Z31DRh1 | Z31DRh2 | Z31DRh3 | Z31DRh4r | Z31DRh5 | Z31DRh6r | Z31J1DRh1 | Z31J1DRh2 | Z31J1DRh3 | Z31J1DRh4 | Z31J1DRh5 | Z31J1DRh6 | taxonomy                                                                                                       |
|---------|---------|---------|---------|----------|---------|----------|-----------|-----------|-----------|-----------|-----------|-----------|----------------------------------------------------------------------------------------------------------------|
| Otu3072 | 2       | 0       | 0       | 0        | 0       | 1        | 0         | 0         | 0         | 0         | 0         | 0         | Bacteria; OP3; koll11; GIF10; kpj58rc                                                                          |
| Otu3079 | 2       | 0       | 0       | 1        | 1       | 3        | 1         | 0         | 0         | 0         | 0         | 0         | Bacteria; Planctomycetes; Planctomycetia; Gemmatales; Gemmataceae                                              |
| Otu3078 | 2       | 1       | 0       | 4        | 0       | 1        | 1         | 1         | 1         | 0         | 2         | 0         | Bacteria; Proteobacteria; Deltaproteobacteria; Bdellovibrionales; Bdellovibrionaceae; Bdellovibrio             |
| Otu3677 | 0       | 0       | 0       | 0        | 0       | 2        | 0         | 0         | 0         | 0         | 0         | 0         | Bacteria; Firmicutes; Bacilli; Bacillales; Alicyclobacillaceae; Alicyclobacillus                               |
| Otu3676 | 0       | 2       | 0       | 0        | 0       | 0        | 0         | 0         | 0         | 0         | 0         | 0         | Bacteria; Verrucomicrobia; Pedosphaerae; Pedosphaerales                                                        |
| Otu3675 | 0       | 0       | 1       | 1        | 0       | 2        | 0         | 0         | 0         | 0         | 1         | 0         | Bacteria; BRC1; PRR-11                                                                                         |
| Otu3278 | 2       | 0       | 0       | 0        | 1       | 0        | 0         | 2         | 3         | 0         | 3         | 2         | Bacteria; Bacteroidetes; Cytophagia; Cytophagales; Cytophagaceae                                               |
| Otu3673 | 0       | 0       | 0       | 0        | 0       | 2        | 0         | 0         | 0         | 2         | 0         | 0         | Bacteria; Chloroflexi; C0119                                                                                   |
| Otu3672 | 0       | 0       | 0       | 0        | 0       | 1        | 0         | 2         | 0         | 0         | 0         | 1         | Bacteria; TM6; SJA-4                                                                                           |
| Otu3671 | 3       | 0       | 0       | 1        | 0       | 4        | 3         | 1         | 1         | 1         | 1         | 1         | Bacteria; Proteobacteria; Gammaproteobacteria                                                                  |
| Otu3670 | 0       | 0       | 1       | 1        | 1       | 1        | 0         | 0         | 1         | 2         | 2         | 0         | Bacteria; Verrucomicrobia; Pedosphaerae; Pedosphaerales                                                        |
| Otu3679 | 0       | 0       | 0       | 2        | 0       | 0        | 0         | 0         | 0         | 0         | 0         | 0         | Bacteria; TM7                                                                                                  |
| Otu3678 | 1       | 2       | 0       | 0        | 1       | 1        | 0         | 1         | 0         | 0         | 0         | 0         | Bacteria; Proteobacteria; Deltaproteobacteria; Bdellovibrionales; Bdellovibrionaceae; Bdellovibrio             |
| Otu307  | 51      | 46      | 30      | 71       | 41      | 75       | 49        | 44        | 79        | 38        | 54        | 61        | Bacteria; Proteobacteria; Alphaproteobacteria                                                                  |
| Otu306  | 54      | 102     | 84      | 94       | 42      | 101      | 92        | 63        | 38        | 77        | 116       | 23        | Bacteria; Proteobacteria; Betaproteobacteria                                                                   |
| Otu305  | 14      | 65      | 34      | 46       | 17      | 43       | 35        | 8         | 7         | 52        | 58        | 10        | Bacteria; Gemmatimonadetes; Gemmatimonadetes; NI423WL                                                          |
| Otu304  | 18      | 3       | 8       | 41       | 9       | 26       | 0         | 6         | 54        | 1         | 2         | 7         | Bacteria; Verrucomicrobia                                                                                      |
| Otu303  | 89      | 52      | 148     | 107      | 51      | 70       | 20        | 75        | 33        | 13        | 17        | 63        | Bacteria; Verrucomicrobia; Spartobacteria; Chthoniobacteriales; Chthoniobacteraceae; Chthoniobacter            |
| Otu302  | 2       | 5       | 10      | 52       | 5       | 78       | 3         | 17        | 19        | 8         | 1         | 22        | Bacteria; Bacteroidetes; Sphingobacteriia; Sphingobacteriales; Sphingobacteriaceae                             |
| Otu301  | 0       | 0       | 0       | 60       | 0       | 27       | 0         | 0         | 0         | 0         | 0         | 0         | Bacteria; Fusobacteria; Fusobacteriia; Fusobacteriales; Fusobacteriaceae; Cetobacterium; Cetobacterium_somerae |
| Otu300  | 5       | 1       | 1       | 0        | 0       | 74       | 0         | 0         | 0         | 0         | 0         | 0         | Bacteria; Cyanobacteria; Oscillatoriothycidae; Oscillatoriales; Phormidiaceae; Phormidium                      |
| Otu2669 | 4       | 0       | 0       | 0        | 0       | 0        | 0         | 0         | 0         | 0         | 0         | 0         | Bacteria; Bacteroidetes; Cytophagia; Cytophagales; Cytophagaceae                                               |

| #OTU ID | Z31DRh1 | Z31DRh2 | Z31DRh3 | Z31DRh4r | Z31DRh5 | Z31DRh6r | Z31J1DRh1 | Z31J1DRh2 | Z31J1DRh3 | Z31J1DRh4 | Z31J1DRh5 | Z31J1DRh6 | taxonomy                                                                                          |
|---------|---------|---------|---------|----------|---------|----------|-----------|-----------|-----------|-----------|-----------|-----------|---------------------------------------------------------------------------------------------------|
| Otu309  | 36      | 99      | 98      | 113      | 33      | 64       | 121       | 146       | 74        | 87        | 68        | 44        | Bacteria; Bacteroidetes; Saprospirae; Saprospirales; Chitinophagaceae; Flavisolibacter            |
| Otu308  | 20      | 19      | 9       | 9        | 12      | 19       | 24        | 36        | 24        | 61        | 13        | 5         | Bacteria; Verrucomicrobia; Pedosphaerae; Pedosphaerales                                           |
| Otu2331 | 0       | 0       | 0       | 3        | 0       | 0        | 0         | 0         | 0         | 0         | 4         | 0         | Bacteria; Bacteroidetes; VC2_1_Bac22                                                              |
| Otu2668 | 0       | 2       | 0       | 0        | 0       | 0        | 0         | 0         | 0         | 0         | 0         | 0         | Bacteria; Proteobacteria; Gammaproteobacteria; Legionellales; Legionellaceae                      |
| Otu2330 | 0       | 0       | 0       | 0        | 0       | 0        | 0         | 1         | 4         | 2         | 1         | 0         | Bacteria; OD1; Mb-NB09                                                                            |
| Otu2333 | 0       | 3       | 0       | 0        | 0       | 0        | 0         | 0         | 0         | 0         | 0         | 0         | Bacteria; Proteobacteria; Deltaproteobacteria; PB19                                               |
| Otu3118 | 3       | 0       | 0       | 0        | 0       | 0        | 0         | 0         | 0         | 0         | 0         | 0         | Bacteria; Proteobacteria; Alphaproteobacteria; Rhodospirillales; Acetobacteraceae                 |
| Otu2332 | 0       | 0       | 3       | 5        | 7       | 1        | 0         | 1         | 1         | 0         | 0         | 1         | Bacteria; TM7; TM7-3                                                                              |
| Otu3112 | 0       | 0       | 0       | 2        | 0       | 0        | 0         | 0         | 0         | 0         | 0         | 0         | Bacteria; Proteobacteria; Deltaproteobacteria; Desulfovibrionales; Desulfovibrionaceae; Bilophila |
| Otu2335 | 0       | 1       | 0       | 0        | 0       | 0        | 0         | 0         | 0         | 0         | 9         | 0         | Bacteria; Proteobacteria; Deltaproteobacteria; Desulfuromonadales; Geobacteraceae; Geobacter      |
| Otu3110 | 0       | 2       | 0       | 1        | 0       | 0        | 0         | 0         | 0         | 0         | 0         | 0         | Bacteria; Proteobacteria                                                                          |
| Otu3111 | 4       | 2       | 0       | 0        | 0       | 2        | 0         | 0         | 0         | 0         | 5         | 0         | Bacteria; Bacteroidetes; Sphingobacteriia; Sphingobacteriales                                     |
| Otu3116 | 0       | 4       | 0       | 0        | 0       | 0        | 0         | 0         | 0         | 0         | 0         | 0         | Bacteria; Chloroflexi; Anaerolineae; S0208                                                        |
| Otu3117 | 0       | 2       | 0       | 0        | 0       | 0        | 0         | 0         | 0         | 0         | 0         | 0         | Bacteria; Proteobacteria; Gammaproteobacteria; Xanthomonadales; Sinobacteraceae                   |
| Otu3114 | 1       | 1       | 0       | 0        | 1       | 0        | 0         | 2         | 1         | 0         | 4         | 1         | Bacteria                                                                                          |
| Otu2334 | 0       | 3       | 0       | 0        | 3       | 2        | 0         | 0         | 0         | 0         | 2         | 2         | Bacteria; Proteobacteria; Alphaproteobacteria; Rhizobiales                                        |
| Otu2418 | 3       | 7       | 10      | 1        | 10      | 3        | 11        | 5         | 5         | 3         | 1         | 0         | Bacteria; Bacteroidetes; Saprospirae; Saprospirales; Chitinophagaceae                             |
| Otu2419 | 0       | 0       | 0       | 4        | 0       | 0        | 0         | 0         | 1         | 0         | 0         | 0         | Bacteria                                                                                          |
| Otu2337 | 1       | 0       | 1       | 4        | 0       | 2        | 1         | 0         | 0         | 2         | 4         | 0         | Bacteria                                                                                          |
| Otu3614 | 0       | 0       | 0       | 0        | 1       | 0        | 0         | 1         | 2         | 0         | 3         | 0         | Bacteria; Proteobacteria; Alphaproteobacteria; Rhodospirillales; Rhodospirillaceae                |
| Otu2410 | 8       | 1       | 7       | 25       | 8       | 31       | 3         | 4         | 10        | 0         | 2         | 16        | Bacteria; Actinobacteria; Actinobacteria; Actinomycetales; Microbacteriaceae                      |
| Otu2411 | 2       | 0       | 0       | 1        | 2       | 3        | 0         | 0         | 0         | 0         | 0         | 0         | Bacteria; Cyanobacteria                                                                           |

| #OTU ID | Z31DRh1 | Z31DRh2 | Z31DRh3 | Z31DRh4r | Z31DRh5 | Z31DRh6r | Z31J1DRh1 | Z31J1DRh2 | Z31J1DRh3 | Z31J1DRh4 | Z31J1DRh5 | Z31J1DRh6 | taxonomy                                                                                      |
|---------|---------|---------|---------|----------|---------|----------|-----------|-----------|-----------|-----------|-----------|-----------|-----------------------------------------------------------------------------------------------|
| Otu2412 | 0       | 2       | 4       | 6        | 4       | 2        | 2         | 11        | 6         | 2         | 5         | 1         | Bacteria; Acidobacteria; Solibacteres; Solibacterales; Solibacteraceae; Candidatus_Solibacter |
| Otu2336 | 2       | 0       | 0       | 0        | 0       | 1        | 1         | 4         | 5         | 1         | 3         | 0         | Bacteria; ODI; SM2F11                                                                         |
| Otu2414 | 0       | 0       | 0       | 0        | 3       | 0        | 0         | 0         | 0         | 0         | 0         | 0         | Bacteria; Acidobacteria; Chloracidobacteria; Ellin7246                                        |
| Otu2415 | 0       | 3       | 0       | 0        | 3       | 0        | 0         | 0         | 0         | 0         | 1         | 0         | Bacteria; Verrucomicrobia; Pedosphaerae; Pedosphaerales                                       |
| Otu2416 | 0       | 0       | 1       | 1        | 1       | 4        | 2         | 1         | 0         | 0         | 1         | 0         | Bacteria; Proteobacteria; Gammaproteobacteria; Legionellales; Coxiellaceae                    |
| Otu2417 | 0       | 7       | 5       | 6        | 12      | 8        | 8         | 5         | 3         | 5         | 13        | 4         | Bacteria; Proteobacteria; Deltaproteobacteria; Myxococcales                                   |
| Otu163  | 121     | 9       | 85      | 84       | 12      | 105      | 29        | 17        | 29        | 29        | 15        | 30        | Bacteria; Proteobacteria; Alphaproteobacteria; Rhizobiales; Xanthobacteraceae; Labrys         |
| Otu162  | 91      | 200     | 89      | 202      | 127     | 251      | 125       | 222       | 78        | 76        | 151       | 40        | Bacteria; Bacteroidetes; Saprospirae; Saprospirales; Chitinophagaceae                         |
| Otu161  | 23      | 7       | 14      | 183      | 11      | 67       | 18        | 7         | 67        | 70        | 14        | 63        | Bacteria; Proteobacteria; Alphaproteobacteria; Rhodospirillales; Rhodospirillaceae            |
| Otu160  | 13      | 1       | 4       | 106      | 8       | 0        | 6         | 4         | 1         | 4         | 0         | 1         | Bacteria                                                                                      |
| Otu167  | 40      | 73      | 61      | 89       | 50      | 107      | 70        | 59        | 66        | 55        | 62        | 35        | Bacteria; Bacteroidetes; Saprospirae; Saprospirales; Chitinophagaceae                         |
| Otu166  | 73      | 67      | 57      | 141      | 33      | 140      | 103       | 67        | 62        | 107       | 57        | 41        | Bacteria; Proteobacteria; Gammaproteobacteria; Xanthomonadales; Sinobacteraceae               |
| Otu165  | 96      | 80      | 49      | 183      | 51      | 171      | 112       | 84        | 56        | 110       | 72        | 21        | Bacteria; Chloroflexi; Anaerolineae; SBR1031; A4b                                             |
| Otu164  | 45      | 57      | 43      | 78       | 54      | 130      | 68        | 99        | 58        | 67        | 60        | 21        | Bacteria; Planctomycetes; Phycisphaerae; WD2101                                               |
| Otu3611 | 0       | 0       | 0       | 0        | 0       | 3        | 2         | 1         | 1         | 0         | 1         | 0         | Bacteria; Armatimonadetes; Armatimonadia; FW68                                                |
| Otu169  | 29      | 23      | 48      | 91       | 12      | 119      | 49        | 43        | 51        | 29        | 29        | 34        | Bacteria; Actinobacteria; Actinobacteria; Actinomycetales; Micrococcaceae; Arthrobacter       |
| Otu168  | 31      | 34      | 46      | 89       | 29      | 146      | 95        | 108       | 86        | 77        | 81        | 36        | Bacteria; Proteobacteria; Alphaproteobacteria; Ellin329                                       |
| Otu3176 | 0       | 0       | 0       | 0        | 1       | 2        | 0         | 1         | 0         | 0         | 0         | 0         | Bacteria; Chloroflexi; Anaerolineae; SBR1031; oc28                                            |
| Otu3610 | 0       | 0       | 0       | 0        | 0       | 0        | 0         | 0         | 0         | 2         | 0         | 0         | Bacteria; Nitrospirae; Nitrospira; Nitrospirales; Nitrospiraceae; Nitrospira                  |
| Otu1680 | 0       | 6       | 2       | 0        | 1       | 10       | 6         | 5         | 6         | 1         | 6         | 2         | Bacteria; Planctomycetes; Planctomycetia; Gemmatales; Isosphaeraceae                          |
| Otu1681 | 0       | 2       | 0       | 0        | 0       | 4        | 0         | 5         | 3         | 0         | 2         | 1         | Bacteria; Proteobacteria; Gammaproteobacteria                                                 |
| Otu1682 | 0       | 2       | 4       | 0        | 0       | 3        | 2         | 1         | 0         | 3         | 0         | 0         | Bacteria; Planctomycetes; Phycisphaerae; WD2101                                               |

| #OTU ID | Z31DRh1 | Z31DRh2 | Z31DRh3 | Z31DRh4r | Z31DRh5 | Z31DRh6r | Z31J1DRh1 | Z31J1DRh2 | Z31J1DRh3 | Z31J1DRh4 | Z31J1DRh5 | Z31J1DRh6 | taxonomy                                                                                 |
|---------|---------|---------|---------|----------|---------|----------|-----------|-----------|-----------|-----------|-----------|-----------|------------------------------------------------------------------------------------------|
| Otu1683 | 1       | 1       | 0       | 0        | 0       | 0        | 8         | 1         | 1         | 0         | 1         | 0         | Bacteria; Proteobacteria; Alphaproteobacteria; Rickettsiales; Rickettsiaceae; Rickettsia |
| Otu1684 | 1       | 8       | 3       | 3        | 2       | 3        | 0         | 0         | 1         | 0         | 0         | 0         | Bacteria; Nitrospirae; Nitrospira; Nitrospirales; 0319-6A21                              |
| Otu1685 | 0       | 1       | 1       | 0        | 0       | 1        | 1         | 0         | 0         | 1         | 6         | 0         | Bacteria; Proteobacteria; Deltaproteobacteria; Myxococcales                              |
| Otu1686 | 1       | 0       | 2       | 1        | 1       | 2        | 0         | 0         | 0         | 4         | 0         | 2         | Bacteria; Armatimonadetes; SHA-37                                                        |
| Otu1687 | 0       | 1       | 2       | 0        | 0       | 0        | 4         | 3         | 2         | 0         | 0         | 0         | Bacteria; Acidobacteria; Acidobacteriia; Acidobacteriales                                |
| Otu1688 | 4       | 12      | 0       | 0        | 0       | 0        | 1         | 0         | 0         | 0         | 6         | 0         | Bacteria; Proteobacteria; Deltaproteobacteria; Myxococcales                              |
| Otu1689 | 0       | 2       | 1       | 2        | 0       | 6        | 4         | 0         | 7         | 4         | 2         | 1         | Bacteria; Chloroflexi; Chloroflexi; Roseiflexales                                        |
| Otu2167 | 0       | 0       | 0       | 0        | 1       | 3        | 0         | 1         | 0         | 0         | 0         | 2         | Bacteria; Actinobacteria; Actinobacteria; Actinomycetales                                |
| Otu3171 | 0       | 0       | 0       | 0        | 0       | 0        | 0         | 0         | 0         | 0         | 3         | 0         | Bacteria; Planctomycetes; Planctomycetia; Gemmatales; Gemmataceae                        |
| Otu1920 | 8       | 0       | 0       | 0        | 0       | 0        | 0         | 0         | 0         | 0         | 0         | 0         | Bacteria; Proteobacteria; Deltaproteobacteria; Myxococcales                              |
| Otu3207 | 0       | 0       | 0       | 2        | 0       | 0        | 0         | 0         | 0         | 0         | 0         | 0         | Bacteria                                                                                 |
| Otu3204 | 1       | 3       | 1       | 0        | 1       | 0        | 0         | 0         | 0         | 0         | 2         | 0         | Bacteria; Bacteroidetes                                                                  |
| Otu3205 | 0       | 6       | 2       | 1        | 2       | 3        | 0         | 0         | 0         | 0         | 0         | 0         | Bacteria; Verrucomicrobia; Pedosphaerae; Pedosphaerales                                  |
| Otu3202 | 1       | 1       | 0       | 2        | 2       | 4        | 0         | 0         | 3         | 3         | 6         | 2         | Bacteria; Verrucomicrobia; Pedosphaerae; Pedosphaerales; Ellin517                        |
| Otu3172 | 7       | 3       | 17      | 21       | 7       | 23       | 12        | 18        | 9         | 21        | 23        | 12        | Bacteria; Proteobacteria; Alphaproteobacteria; Caulobacteriales; Caulobacteraceae        |
| Otu3200 | 15      | 0       | 6       | 41       | 45      | 42       | 1         | 5         | 11        | 15        | 5         | 9         | Bacteria; Proteobacteria; Betaproteobacteria; Rhodocyclales; Rhodocyclaceae              |
| Otu2986 | 0       | 0       | 0       | 0        | 0       | 0        | 0         | 2         | 0         | 0         | 0         | 0         | Bacteria; Proteobacteria; Gammaproteobacteria; Legionellales; Coxiellaceae               |
| Otu3173 | 14      | 16      | 24      | 12       | 11      | 2        | 8         | 2         | 4         | 18        | 9         | 23        | Bacteria; Gemmatimonadetes; Gemm-3                                                       |
| Otu4124 | 3       | 0       | 0       | 1        | 0       | 2        | 0         | 0         | 1         | 0         | 0         | 0         | Bacteria; Proteobacteria                                                                 |
| Otu3208 | 0       | 0       | 0       | 0        | 2       | 0        | 0         | 0         | 0         | 0         | 0         | 0         | Bacteria; Proteobacteria; Gammaproteobacteria                                            |
| Otu3209 | 0       | 0       | 0       | 0        | 0       | 0        | 0         | 0         | 0         | 2         | 0         | 0         | Bacteria; Gemmatimonadetes; Gemm-3                                                       |
| Otu2304 | 3       | 0       | 3       | 4        | 0       | 3        | 0         | 0         | 0         | 3         | 0         | 0         | Bacteria; Proteobacteria                                                                 |

| #OTU ID | Z31DRh1 | Z31DRh2 | Z31DRh3 | Z31DRh4r | Z31DRh5 | Z31DRh6r | Z31J1DRh1 | Z31J1DRh2 | Z31J1DRh3 | Z31J1DRh4 | Z31J1DRh5 | Z31J1DRh6 | taxonomy                                                                                           |
|---------|---------|---------|---------|----------|---------|----------|-----------|-----------|-----------|-----------|-----------|-----------|----------------------------------------------------------------------------------------------------|
| Otu2305 | 0       | 0       | 2       | 0        | 6       | 0        | 1         | 0         | 0         | 0         | 1         | 0         | Bacteria; Acidobacteria; Acidobacteria-5                                                           |
| Otu2306 | 3       | 1       | 2       | 3        | 4       | 11       | 0         | 1         | 1         | 0         | 1         | 4         | Bacteria; Planctomycetes; Planctomycetia; Gemmatales; Gemmataceae; Gemmata                         |
| Otu2307 | 0       | 0       | 0       | 0        | 3       | 0        | 0         | 0         | 0         | 0         | 1         | 0         | Bacteria; Acidobacteria; Chloracidobacteria; PK29                                                  |
| Otu2300 | 0       | 0       | 0       | 0        | 0       | 0        | 1         | 1         | 0         | 3         | 0         | 0         | Bacteria; Planctomycetes; Planctomycetia; Planctomycetales; Planctomycetaceae; Planctomyces        |
| Otu2301 | 0       | 3       | 0       | 1        | 0       | 0        | 0         | 0         | 0         | 0         | 0         | 0         | Bacteria; Chloroflexi; Anaerolineae; CFB-26                                                        |
| Otu2302 | 0       | 1       | 5       | 4        | 1       | 3        | 4         | 1         | 4         | 2         | 5         | 0         | Bacteria; Gemmatimonadetes; Gemmatimonadetes; Gemmatimonadales; Ellin5301                          |
| Otu2303 | 4       | 0       | 2       | 6        | 1       | 1        | 3         | 5         | 2         | 3         | 2         | 2         | Bacteria; Proteobacteria; Deltaproteobacteria; Myxococcales                                        |
| Otu3619 | 2       | 0       | 0       | 0        | 0       | 0        | 0         | 0         | 0         | 0         | 0         | 0         | Bacteria; TM7; TM7-1                                                                               |
| Otu2308 | 0       | 0       | 0       | 4        | 0       | 0        | 0         | 0         | 0         | 0         | 0         | 0         | Bacteria; Acidobacteria                                                                            |
| Otu2309 | 0       | 0       | 1       | 1        | 0       | 4        | 0         | 1         | 0         | 0         | 0         | 0         | Bacteria; Planctomycetes; Planctomycetia; Gemmatales; Gemmataceae                                  |
| Otu3618 | 2       | 0       | 0       | 0        | 0       | 0        | 0         | 0         | 0         | 0         | 0         | 0         | Bacteria; Proteobacteria; Betaproteobacteria                                                       |
| Otu4105 | 0       | 2       | 0       | 0        | 0       | 0        | 0         | 0         | 0         | 0         | 0         | 0         | Bacteria; Planctomycetes; Planctomycetia; Gemmatales; Isosphaeraceae                               |
| Otu3219 | 0       | 0       | 0       | 0        | 0       | 2        | 0         | 0         | 0         | 0         | 0         | 0         | Bacteria                                                                                           |
| Otu2249 | 0       | 0       | 0       | 0        | 0       | 0        | 0         | 0         | 0         | 3         | 0         | 0         | Bacteria; Chlamydiae; Chlamydia; Chlamydiales                                                      |
| Otu2248 | 5       | 1       | 0       | 5        | 2       | 0        | 2         | 1         | 0         | 0         | 4         | 9         | Bacteria; Bacteroidetes; Cytophagia; Cytophagales; Cytophagaceae                                   |
| Otu3497 | 4       | 2       | 0       | 0        | 0       | 2        | 1         | 0         | 0         | 0         | 1         | 0         | Bacteria; Planctomycetes; Planctomycetia; Gemmatales; Gemmataceae; Gemmata                         |
| Otu3843 | 2       | 0       | 0       | 0        | 0       | 0        | 0         | 0         | 0         | 0         | 0         | 0         | Bacteria; Planctomycetes; Planctomycetia; Gemmatales; Gemmataceae                                  |
| Otu3844 | 0       | 0       | 0       | 0        | 0       | 2        | 0         | 0         | 1         | 0         | 0         | 0         | Bacteria; Chloroflexi; Ktedonobacteria                                                             |
| Otu3845 | 0       | 0       | 0       | 0        | 0       | 0        | 2         | 0         | 0         | 0         | 0         | 0         | Bacteria; Fusobacteria; Fusobacteriia; Fusobacteriales; Leptotrichiaceae; Leptotrichia             |
| Otu3846 | 0       | 0       | 0       | 0        | 0       | 0        | 2         | 0         | 0         | 0         | 0         | 0         | Bacteria; Proteobacteria; Deltaproteobacteria; Bdellovibrionales; Bdellovibrionaceae; Bdellovibrio |
| Otu3847 | 0       | 1       | 0       | 1        | 0       | 4        | 3         | 5         | 3         | 1         | 2         | 0         | Bacteria; Verrucomicrobia; Pedosphaerae; Pedosphaerales                                            |
| Otu2241 | 0       | 1       | 2       | 0        | 1       | 0        | 1         | 0         | 0         | 1         | 3         | 0         | Bacteria; Bacteroidetes; Saprospirae; Saprospirales                                                |

| #OTU ID | Z31DRh1 | Z31DRh2 | Z31DRh3 | Z31DRh4r | Z31DRh5 | Z31DRh6r | Z31J1DRh1 | Z31J1DRh2 | Z31J1DRh3 | Z31J1DRh4 | Z31J1DRh5 | Z31J1DRh6 | taxonomy                                                                                                           |
|---------|---------|---------|---------|----------|---------|----------|-----------|-----------|-----------|-----------|-----------|-----------|--------------------------------------------------------------------------------------------------------------------|
| Otu2240 | 3       | 2       | 0       | 1        | 0       | 1        | 3         | 0         | 1         | 0         | 0         | 0         | Bacteria; Armatimonadetes; Chthonomonadetes; Chthonomonadales; Chthonomonadaceae                                   |
| Otu2243 | 0       | 4       | 0       | 3        | 1       | 0        | 5         | 0         | 1         | 1         | 5         | 0         | Bacteria                                                                                                           |
| Otu2242 | 0       | 0       | 0       | 0        | 0       | 0        | 0         | 0         | 0         | 3         | 0         | 0         | Bacteria; OD1; ZB2                                                                                                 |
| Otu2245 | 0       | 0       | 0       | 0        | 0       | 3        | 0         | 0         | 0         | 0         | 0         | 0         | Bacteria; Planctomycetes; Phycisphaerae; WD2101                                                                    |
| Otu2244 | 0       | 0       | 0       | 0        | 2       | 5        | 0         | 0         | 0         | 2         | 1         | 1         | Bacteria; OD1; SM2F11                                                                                              |
| Otu2247 | 8       | 13      | 5       | 12       | 2       | 22       | 8         | 2         | 6         | 2         | 12        | 9         | Bacteria; Actinobacteria; Actinobacteria; Actinomycetales; Pseudonocardiaceae; Pseudonocardia                      |
| Otu2246 | 4       | 1       | 1       | 0        | 0       | 2        | 2         | 0         | 0         | 0         | 0         | 2         | Bacteria; Proteobacteria; Alphaproteobacteria; Rhodospirillales; Rhodospirillaceae; Inquilinus; Inquilinus_limosus |
| Otu3596 | 0       | 0       | 1       | 0        | 0       | 3        | 0         | 0         | 0         | 3         | 0         | 0         | Bacteria; Cyanobacteria; Chloroplast; Chlorophyta                                                                  |
| Otu3597 | 0       | 0       | 0       | 0        | 0       | 3        | 0         | 0         | 2         | 0         | 2         | 0         | Bacteria; Chloroflexi; Ktedonobacteria; Ktedonobacterales; Ktedonobacteraceae; FFCH10602                           |
| Otu1506 | 0       | 4       | 0       | 1        | 10      | 6        | 4         | 8         | 2         | 6         | 8         | 0         | Bacteria; Elusimicrobia; Elusimicrobia; IIb                                                                        |
| Otu3594 | 27      | 80      | 63      | 99       | 66      | 277      | 81        | 135       | 86        | 67        | 109       | 35        | Bacteria; Acidobacteria; Solibacteres; Solibacterales; Solibacteraceae; Candidatus_Solibacter                      |
| Otu3867 | 0       | 0       | 0       | 0        | 1       | 2        | 0         | 1         | 0         | 1         | 0         | 2         | Bacteria; Bacteroidetes; Saprospirae; Saprospirales; Chitinophagaceae                                              |
| Otu3595 | 2       | 1       | 0       | 6        | 0       | 2        | 0         | 1         | 0         | 1         | 0         | 0         | Bacteria; Verrucomicrobia; Spartobacteria; Chthoniobacterales; Chthoniobacteraceae                                 |
| Otu3592 | 0       | 0       | 0       | 0        | 0       | 0        | 2         | 0         | 0         | 0         | 0         | 0         | Bacteria; Planctomycetes; Planctomycetia; Gemmatales; Gemmataceae                                                  |
| Otu3524 | 2       | 0       | 0       | 1        | 0       | 1        | 1         | 0         | 0         | 0         | 1         | 0         | Bacteria; Planctomycetes; Phycisphaerae; WD2101                                                                    |
| Otu3593 | 0       | 0       | 0       | 0        | 0       | 0        | 0         | 2         | 0         | 0         | 0         | 0         | Bacteria                                                                                                           |
| Otu3739 | 3       | 0       | 0       | 3        | 0       | 2        | 0         | 0         | 0         | 0         | 0         | 0         | Bacteria; Planctomycetes; Phycisphaerae; WD2101                                                                    |
| Otu3591 | 0       | 0       | 0       | 0        | 0       | 0        | 0         | 0         | 0         | 0         | 3         | 0         | Bacteria; GN02; 3BR-5F                                                                                             |
| Otu3170 | 0       | 0       | 0       | 2        | 0       | 0        | 0         | 0         | 0         | 0         | 0         | 0         | Bacteria; Proteobacteria; Betaproteobacteria; Burkholderiales; Burkholderiaceae; Candidatus_Glomeribacter          |
| Otu3358 | 0       | 0       | 0       | 0        | 0       | 0        | 0         | 2         | 0         | 0         | 0         | 0         | Bacteria; Proteobacteria; Alphaproteobacteria; Sphingomonadales; Sphingomonadaceae                                 |
| Otu1031 | 3       | 3       | 2       | 6        | 0       | 3        | 0         | 0         | 0         | 2         | 9         | 0         | Bacteria; Proteobacteria; Deltaproteobacteria; Myxococcales                                                        |
| Otu1030 | 0       | 8       | 0       | 0        | 0       | 0        | 0         | 0         | 0         | 0         | 0         | 0         | Bacteria; Proteobacteria                                                                                           |



| #OTU ID | Z31DRh1 | Z31DRh2 | Z31DRh3 | Z31DRh4r | Z31DRh5 | Z31DRh6r | Z31J1DRh1 | Z31J1DRh2 | Z31J1DRh3 | Z31J1DRh4 | Z31J1DRh5 | Z31J1DRh6 | taxonomy                                                                                                                            |
|---------|---------|---------|---------|----------|---------|----------|-----------|-----------|-----------|-----------|-----------|-----------|-------------------------------------------------------------------------------------------------------------------------------------|
| Otu72   | 21      | 1       | 3       | 14       | 2       | 226      | 4         | 15        | 131       | 0         | 0         | 39        | Bacteria; Bacteroidetes; Sphingobacteriia; Sphingobacteriales                                                                       |
| Otu73   | 51      | 54      | 43      | 232      | 250     | 301      | 91        | 295       | 221       | 45        | 146       | 86        | Bacteria; Actinobacteria; Actinobacteria; Actinomycetales; Frankiaceae                                                              |
| Otu70   | 3       | 2       | 2       | 25       | 0       | 0        | 51        | 240       | 1         | 0         | 0         | 0         | Bacteria; Proteobacteria; Gammaproteobacteria; Legionellales                                                                        |
| Otu71   | 18      | 133     | 24      | 26       | 55      | 55       | 36        | 232       | 46        | 32        | 34        | 12        | Bacteria; Actinobacteria; Thermoleophilia; Solirubrobacterales                                                                      |
| Otu76   | 1       | 6       | 12      | 105      | 2       | 61       | 10        | 20        | 235       | 2         | 4         | 7         | Bacteria; Bacteroidetes; Saprospirae; Saprospirales; Chitinophagaceae                                                               |
| Otu77   | 107     | 51      | 103     | 257      | 62      | 242      | 162       | 262       | 128       | 158       | 132       | 77        | Bacteria; Acidobacteria; Acidobacteriia; Acidobacteriales; Koribacteraceae; Candidatus_Koribacter; Candidatus_Koribacter_versatilis |
| Otu74   | 46      | 64      | 116     | 83       | 63      | 181      | 49        | 67        | 138       | 46        | 31        | 260       | Bacteria; Bacteroidetes; Saprospirae; Saprospirales; Chitinophagaceae                                                               |
| Otu75   | 5       | 0       | 22      | 250      | 0       | 22       | 2         | 4         | 3         | 1         | 2         | 2         | Bacteria; Proteobacteria; Gammaproteobacteria; Legionellales; Coxiellaceae; Aquicella                                               |
| Otu1525 | 4       | 4       | 10      | 7        | 6       | 6        | 2         | 6         | 5         | 4         | 2         | 1         | Bacteria; Armatimonadetes; Chthonomonadetes; Chthonomonadales; Chthonomonadaceae                                                    |
| Otu1524 | 3       | 7       | 1       | 1        | 2       | 4        | 1         | 1         | 0         | 0         | 6         | 1         | Bacteria; Chloroflexi; TK17; mle1-48                                                                                                |
| Otu78   | 19      | 2       | 45      | 219      | 7       | 137      | 40        | 104       | 65        | 29        | 94        | 23        | Bacteria; Acidobacteria; Acidobacteriia; Acidobacteriales; Koribacteraceae; Candidatus_Koribacter                                   |
| Otu79   | 193     | 479     | 224     | 243      | 247     | 239      | 232       | 216       | 127       | 167       | 255       | 95        | Bacteria; Verrucomicrobia; Spartobacteria; Chthoniobacteriales; Chthoniobacteraceae; DA101                                          |
| Otu1521 | 0       | 3       | 1       | 0        | 1       | 0        | 1         | 4         | 8         | 0         | 0         | 2         | Bacteria; TM6; SJA-4                                                                                                                |
| Otu1520 | 0       | 0       | 1       | 3        | 1       | 1        | 7         | 0         | 0         | 2         | 1         | 4         | Bacteria; Proteobacteria; Gammaproteobacteria; Legionellales                                                                        |
| Otu1523 | 26      | 24      | 18      | 17       | 11      | 32       | 31        | 52        | 28        | 16        | 18        | 26        | Bacteria; Proteobacteria; Alphaproteobacteria; Sphingomonadales; Sphingomonadaceae                                                  |
| Otu1522 | 0       | 1       | 1       | 8        | 0       | 1        | 1         | 0         | 0         | 0         | 0         | 0         | Bacteria; Actinobacteria; Actinobacteria; Actinomycetales                                                                           |
| Otu2256 | 0       | 2       | 1       | 1        | 1       | 0        | 1         | 0         | 0         | 0         | 3         | 0         | Bacteria; Verrucomicrobia; Pedosphaerae; Pedosphaerales                                                                             |
| Otu2257 | 0       | 1       | 1       | 2        | 1       | 7        | 0         | 1         | 1         | 0         | 2         | 0         | Bacteria; Proteobacteria; Gammaproteobacteria; Legionellales; Legionellaceae; Legionella                                            |
| Otu3218 | 0       | 0       | 0       | 0        | 3       | 0        | 0         | 0         | 0         | 0         | 0         | 0         | Bacteria; Bacteroidetes; Sphingobacteriia; Sphingobacteriales                                                                       |
| Otu1561 | 0       | 0       | 0       | 0        | 2       | 0        | 0         | 0         | 0         | 2         | 10        | 0         | Bacteria; OP11; OP11-3                                                                                                              |
| Otu1039 | 11      | 5       | 5       | 9        | 6       | 10       | 6         | 6         | 1         | 13        | 7         | 1         | Bacteria; Bacteroidetes; Saprospirae; Saprospirales; Chitinophagaceae                                                               |
| Otu4427 | 0       | 0       | 0       | 0        | 0       | 0        | 0         | 0         | 0         | 0         | 2         | 0         | Bacteria; Elusimicrobia; Elusimicrobia; FAC88                                                                                       |

| #OTU ID | Z31DRh1 | Z31DRh2 | Z31DRh3 | Z31DRh4r | Z31DRh5 | Z31DRh6r | Z31J1DRh1 | Z31J1DRh2 | Z31J1DRh3 | Z31J1DRh4 | Z31J1DRh5 | Z31J1DRh6 | taxonomy                                                                                           |
|---------|---------|---------|---------|----------|---------|----------|-----------|-----------|-----------|-----------|-----------|-----------|----------------------------------------------------------------------------------------------------|
| Otu1560 | 9       | 0       | 2       | 4        | 5       | 18       | 1         | 1         | 9         | 4         | 2         | 2         | Bacteria; Chlorobi                                                                                 |
| Otu2159 | 1       | 0       | 0       | 0        | 0       | 0        | 3         | 6         | 0         | 0         | 0         | 0         | Bacteria; Chlamydiae; Chlamydia; Chlamydiales                                                      |
| Otu1038 | 0       | 1       | 2       | 3        | 4       | 11       | 5         | 3         | 4         | 1         | 11        | 0         | Bacteria; Proteobacteria; Gammaproteobacteria; Legionellales; Coxiellaceae; Aquicella              |
| Otu1563 | 68      | 40      | 43      | 121      | 19      | 184      | 69        | 67        | 85        | 67        | 27        | 66        | Bacteria; Proteobacteria; Alphaproteobacteria; Ellin329                                            |
| Otu2158 | 3       | 4       | 1       | 7        | 3       | 2        | 4         | 0         | 1         | 4         | 6         | 9         | Bacteria; Proteobacteria; Alphaproteobacteria; Rhodospirillales; Rhodospirillaceae                 |
| Otu2937 | 29      | 84      | 25      | 30       | 34      | 61       | 40        | 52        | 39        | 65        | 59        | 24        | Bacteria; Acidobacteria; Acidobacteria-6; iii1-15                                                  |
| Otu952  | 4       | 5       | 2       | 1        | 5       | 24       | 4         | 12        | 9         | 5         | 6         | 0         | Bacteria; Verrucomicrobia; Pedosphaerae; Pedosphaerales                                            |
| Otu2935 | 0       | 0       | 0       | 0        | 0       | 0        | 0         | 0         | 2         | 0         | 0         | 0         | Bacteria; Firmicutes; Bacilli; Bacillales; Paenibacillaceae                                        |
| Otu1562 | 8       | 2       | 3       | 0        | 13      | 2        | 1         | 2         | 0         | 6         | 0         | 2         | Bacteria; Proteobacteria; Deltaproteobacteria; Myxococcales; Polyangiaceae; Sorangium              |
| Otu2933 | 0       | 0       | 0       | 0        | 0       | 0        | 0         | 2         | 0         | 0         | 0         | 0         | Bacteria; Verrucomicrobia; Verrucomicrobiae; Verrucomicrobiales; Verrucomicrobiaceae               |
| Otu2932 | 1       | 0       | 0       | 0        | 0       | 2        | 0         | 0         | 2         | 0         | 0         | 0         | Bacteria; Proteobacteria; Gammaproteobacteria; Xanthomonadales; Xanthomonadaceae                   |
| Otu2931 | 0       | 2       | 0       | 1        | 0       | 0        | 0         | 0         | 2         | 1         | 1         | 0         | Bacteria; Proteobacteria; Gammaproteobacteria; Legionellales                                       |
| Otu953  | 12      | 22      | 10      | 9        | 4       | 6        | 13        | 3         | 3         | 10        | 20        | 5         | Bacteria; Planctomycetes; Phycisphaerae; WD2101                                                    |
| Otu4038 | 0       | 1       | 0       | 2        | 2       | 0        | 0         | 0         | 0         | 0         | 4         | 0         | Bacteria; Planctomycetes; Planctomycetia; Pirellulales; Pirellulaceae                              |
| Otu1565 | 0       | 5       | 0       | 0        | 1       | 0        | 0         | 0         | 0         | 0         | 1         | 0         | Bacteria; Gemmatimonadetes; Gemmatimonadetes; C114                                                 |
| Otu4367 | 0       | 0       | 0       | 1        | 2       | 1        | 0         | 0         | 1         | 0         | 1         | 0         | Bacteria; Chloroflexi; C0119                                                                       |
| Otu950  | 7       | 7       | 17      | 4        | 1       | 0        | 1         | 0         | 0         | 0         | 18        | 0         | Bacteria; Proteobacteria; Betaproteobacteria; Neisseriales; Neisseriaceae                          |
| Otu2939 | 0       | 1       | 0       | 1        | 1       | 2        | 1         | 2         | 0         | 2         | 4         | 0         | Bacteria; Gemmatimonadetes; Gemmatimonadetes                                                       |
| Otu1564 | 1       | 2       | 3       | 8        | 2       | 10       | 5         | 2         | 5         | 1         | 2         | 4         | Bacteria; Proteobacteria; Deltaproteobacteria; Bdellovibrionales; Bdellovibrionaceae; Bdellovibrio |
| Otu951  | 3       | 12      | 0       | 9        | 6       | 3        | 6         | 2         | 1         | 1         | 8         | 1         | Bacteria; Chloroflexi; Anaerolineae; GCA004                                                        |
| Otu2448 | 1       | 3       | 0       | 1        | 3       | 3        | 0         | 0         | 0         | 4         | 1         | 0         | Bacteria; Planctomycetes; Planctomycetia; Gemmatales; Gemmataceae                                  |
| Otu1567 | 0       | 0       | 0       | 0        | 5       | 0        | 0         | 1         | 0         | 0         | 4         | 0         | Bacteria; Proteobacteria; Gammaproteobacteria                                                      |

| #OTU ID | Z31DRh1 | Z31DRh2 | Z31DRh3 | Z31DRh4r | Z31DRh5 | Z31DRh6r | Z31J1DRh1 | Z31J1DRh2 | Z31J1DRh3 | Z31J1DRh4 | Z31J1DRh5 | Z31J1DRh6 | taxonomy                                                                                      |
|---------|---------|---------|---------|----------|---------|----------|-----------|-----------|-----------|-----------|-----------|-----------|-----------------------------------------------------------------------------------------------|
| Otu4314 | 0       | 0       | 0       | 2        | 0       | 0        | 0         | 0         | 0         | 0         | 0         | 0         | Bacteria; Acidobacteria; S035                                                                 |
| Otu956  | 0       | 7       | 0       | 0        | 1       | 0        | 0         | 12        | 7         | 1         | 0         | 1         | Bacteria; TM6; SJA-4                                                                          |
| Otu1566 | 5       | 1       | 2       | 7        | 0       | 0        | 0         | 0         | 0         | 0         | 2         | 0         | Bacteria; Planctomycetes; vadinHA49; p04_C01                                                  |
| Otu4392 | 0       | 1       | 0       | 1        | 0       | 0        | 2         | 0         | 0         | 0         | 0         | 0         | Bacteria; Acidobacteria; Solibacteres; Solibacterales                                         |
| Otu2157 | 0       | 0       | 3       | 0        | 0       | 0        | 0         | 0         | 0         | 0         | 0         | 0         | Bacteria; Proteobacteria; Gammaproteobacteria; Xanthomonadales; Sinobacteraceae               |
| Otu957  | 4       | 0       | 3       | 3        | 3       | 3        | 0         | 0         | 2         | 1         | 21        | 0         | Bacteria; Chloroflexi; Chloroflexi; Herpetosiphonales                                         |
| Otu1239 | 0       | 0       | 1       | 2        | 7       | 13       | 4         | 1         | 0         | 1         | 2         | 1         | Bacteria; Acidobacteria; iii1-8; 32-20                                                        |
| Otu1238 | 2       | 3       | 1       | 6        | 2       | 4        | 3         | 8         | 1         | 3         | 5         | 0         | Bacteria; Chloroflexi; TK10; AKYG885; Dolo_23                                                 |
| Otu2156 | 4       | 2       | 0       | 0        | 0       | 0        | 0         | 1         | 3         | 0         | 0         | 0         | Bacteria; Proteobacteria; Gammaproteobacteria; Xanthomonadales; Xanthomonadaceae              |
| Otu770  | 14      | 8       | 5       | 10       | 12      | 6        | 1         | 6         | 10        | 5         | 16        | 1         | Bacteria; Bacteroidetes; Cytophagia; Cytophagales; Cytophagaceae                              |
| Otu1231 | 4       | 6       | 5       | 5        | 4       | 7        | 9         | 7         | 1         | 9         | 5         | 2         | Bacteria; Acidobacteria; EC1113                                                               |
| Otu1230 | 2       | 9       | 3       | 2        | 3       | 3        | 3         | 0         | 6         | 2         | 3         | 0         | Bacteria; Actinobacteria; MB-A2-108; 0319-7L14                                                |
| Otu1233 | 5       | 7       | 7       | 4        | 5       | 7        | 13        | 3         | 4         | 7         | 5         | 3         | Bacteria; Cyanobacteria; 4C0d-2; MLE1-12                                                      |
| Otu771  | 2       | 1       | 4       | 12       | 1       | 14       | 3         | 6         | 9         | 1         | 13        | 0         | Bacteria; TM7; SC3                                                                            |
| Otu1235 | 4       | 0       | 2       | 5        | 1       | 8        | 1         | 2         | 0         | 6         | 1         | 9         | Bacteria; Chloroflexi; Ktedonobacteria; JG30-KF-AS9                                           |
| Otu1234 | 2       | 3       | 5       | 3        | 1       | 17       | 0         | 1         | 0         | 0         | 1         | 1         | Bacteria; Planctomycetes; Planctomycetia; Gemmatales; Gemmataceae; Gemmata                    |
| Otu1237 | 1       | 2       | 2       | 3        | 3       | 22       | 1         | 9         | 5         | 0         | 10        | 3         | Bacteria; Acidobacteria; Solibacteres; Solibacterales; Solibacteraceae; Candidatus_Solibacter |
| Otu1236 | 1       | 9       | 0       | 8        | 6       | 11       | 3         | 3         | 2         | 1         | 5         | 0         | Bacteria; Chloroflexi; Anaerolineae; A31                                                      |
| Otu893  | 31      | 33      | 16      | 31       | 23      | 51       | 18        | 11        | 15        | 25        | 12        | 21        | Bacteria; Actinobacteria; Actinobacteria; Actinomycetales; Micromonosporaceae                 |
| Otu4425 | 0       | 0       | 0       | 0        | 0       | 0        | 3         | 0         | 0         | 0         | 0         | 0         | Bacteria; Acidobacteria; Solibacteres; JH-WHS99                                               |
| Otu2258 | 0       | 1       | 0       | 1        | 1       | 0        | 0         | 0         | 0         | 0         | 3         | 0         | Bacteria; Proteobacteria; Deltaproteobacteria; Myxococcales; Haliangiaceae                    |
| Otu892  | 2       | 1       | 8       | 17       | 7       | 16       | 1         | 1         | 8         | 7         | 7         | 0         | Bacteria; Bacteroidetes; Saprospirae; Saprospirales; Chitinophagaceae                         |

| #OTU ID | Z31DRh1 | Z31DRh2 | Z31DRh3 | Z31DRh4r | Z31DRh5 | Z31DRh6r | Z31J1DRh1 | Z31J1DRh2 | Z31J1DRh3 | Z31J1DRh4 | Z31J1DRh5 | Z31J1DRh6 | taxonomy                                                                                         |
|---------|---------|---------|---------|----------|---------|----------|-----------|-----------|-----------|-----------|-----------|-----------|--------------------------------------------------------------------------------------------------|
| Otu2259 | 0       | 2       | 1       | 3        | 1       | 8        | 6         | 13        | 4         | 2         | 4         | 4         | Bacteria; Cyanobacteria; 4C0d-2; MLE1-12                                                         |
| Otu891  | 10      | 21      | 14      | 8        | 21      | 12       | 12        | 5         | 2         | 14        | 6         | 17        | Bacteria; Proteobacteria; Gammaproteobacteria; HTCC2188; HTCC2089                                |
| Otu4175 | 0       | 0       | 0       | 3        | 0       | 1        | 0         | 0         | 0         | 0         | 0         | 0         | Bacteria; TM7; TM7-1                                                                             |
| Otu3688 | 0       | 5       | 0       | 4        | 2       | 11       | 3         | 2         | 1         | 1         | 10        | 0         | Bacteria; Verrucomicrobia; Pedosphaerae; Pedosphaerales; Ellin515                                |
| Otu890  | 1       | 0       | 0       | 3        | 0       | 1        | 3         | 0         | 12        | 0         | 5         | 0         | Bacteria                                                                                         |
| Otu4106 | 0       | 0       | 0       | 0        | 0       | 0        | 2         | 0         | 0         | 0         | 0         | 0         | Bacteria                                                                                         |
| Otu3682 | 0       | 0       | 0       | 0        | 2       | 0        | 0         | 0         | 0         | 1         | 0         | 0         | Bacteria; Chlorobi; SJA-28                                                                       |
| Otu897  | 13      | 40      | 22      | 33       | 19      | 23       | 12        | 10        | 11        | 20        | 16        | 11        | Bacteria; Planctomycetes; Phycisphaerae; WD2101                                                  |
| Otu3680 | 13      | 24      | 13      | 11       | 3       | 18       | 16        | 6         | 8         | 17        | 9         | 4         | Bacteria; Proteobacteria; Alphaproteobacteria; Sphingomonadales; Sphingomonadaceae; Kaistobacter |
| Otu3681 | 0       | 0       | 2       | 3        | 1       | 0        | 0         | 0         | 0         | 0         | 2         | 2         | Bacteria; Proteobacteria; Alphaproteobacteria; Caulobacteriales; Caulobacteraceae                |
| Otu3686 | 0       | 1       | 0       | 2        | 0       | 0        | 0         | 0         | 0         | 0         | 0         | 0         | Bacteria; Armatimonadetes; 0319-6E2                                                              |
| Otu3687 | 5       | 22      | 5       | 15       | 9       | 9        | 9         | 3         | 1         | 12        | 2         | 5         | Bacteria; Acidobacteria; Chloracidobacteria; RB41                                                |
| Otu3684 | 0       | 0       | 0       | 2        | 0       | 0        | 2         | 0         | 0         | 2         | 0         | 0         | Bacteria; Cyanobacteria; ML635J-21                                                               |
| Otu896  | 6       | 4       | 1       | 16       | 0       | 8        | 4         | 3         | 0         | 0         | 1         | 1         | Bacteria; Proteobacteria; Betaproteobacteria; Methylophilales; Methylophilaceae                  |
| Otu4383 | 0       | 0       | 0       | 1        | 0       | 0        | 0         | 0         | 0         | 0         | 0         | 2         | Bacteria; TM7; SC3                                                                               |
| Otu3448 | 0       | 0       | 0       | 0        | 0       | 2        | 0         | 0         | 0         | 0         | 0         | 0         | Bacteria; Proteobacteria; Betaproteobacteria; Burkholderiales; Comamonadaceae                    |
| Otu671  | 11      | 14      | 7       | 13       | 4       | 15       | 18        | 13        | 14        | 14        | 28        | 9         | Bacteria; Chloroflexi; TK10; B07_WMSP1; FFCH4570                                                 |
| Otu3444 | 0       | 0       | 0       | 2        | 0       | 0        | 0         | 0         | 0         | 0         | 0         | 0         | Bacteria; Proteobacteria; Alphaproteobacteria; Rickettsiales; mitochondria                       |
| Otu3445 | 0       | 0       | 1       | 0        | 2       | 1        | 0         | 0         | 0         | 5         | 0         | 1         | Bacteria; TM7; SC3                                                                               |
| Otu3446 | 0       | 1       | 2       | 0        | 0       | 1        | 0         | 0         | 0         | 0         | 2         | 0         | Bacteria; Chloroflexi; Anaerolineae; GCA004                                                      |
| Otu894  | 4       | 4       | 4       | 12       | 12      | 21       | 15        | 10        | 5         | 6         | 3         | 10        | Bacteria; Proteobacteria; Alphaproteobacteria; Rhizobiales; Hyphomicrobiaceae; Rhodoplanes       |
| Otu3440 | 0       | 0       | 0       | 0        | 0       | 0        | 0         | 0         | 2         | 0         | 0         | 0         | Bacteria; Armatimonadetes; 0319-6E2                                                              |

| #OTU ID | Z31DRh1 | Z31DRh2 | Z31DRh3 | Z31DRh4r | Z31DRh5 | Z31DRh6r | Z31J1DRh1 | Z31J1DRh2 | Z31J1DRh3 | Z31J1DRh4 | Z31J1DRh5 | Z31J1DRh6 | taxonomy                                                                                      |
|---------|---------|---------|---------|----------|---------|----------|-----------|-----------|-----------|-----------|-----------|-----------|-----------------------------------------------------------------------------------------------|
| Otu3441 | 1       | 0       | 0       | 0        | 0       | 2        | 0         | 0         | 1         | 2         | 0         | 0         | Bacteria; Cyanobacteria; 4C0d-2; SM1D11                                                       |
| Otu3442 | 0       | 0       | 0       | 0        | 4       | 0        | 0         | 0         | 0         | 0         | 1         | 0         | Bacteria; TM7; TM7-1                                                                          |
| Otu3443 | 11      | 4       | 6       | 11       | 5       | 6        | 5         | 2         | 6         | 1         | 5         | 0         | Bacteria; Proteobacteria; Deltaproteobacteria; Myxococcales                                   |
| Otu1305 | 9       | 2       | 1       | 1        | 5       | 4        | 0         | 0         | 0         | 0         | 2         | 8         | Bacteria; Proteobacteria; Gammaproteobacteria; Alteromonadales; Alteromonadaceae; Cellvibrio  |
| Otu1304 | 11      | 2       | 5       | 3        | 6       | 8        | 2         | 3         | 0         | 0         | 8         | 0         | Bacteria; Armatimonadetes; Fimbriimonadia; Fimbriimonadales; Fimbriimonadaceae; Fimbriimonas  |
| Otu1307 | 4       | 7       | 3       | 3        | 12      | 8        | 4         | 3         | 1         | 3         | 2         | 7         | Bacteria; Proteobacteria; Alphaproteobacteria; Rhizobiales                                    |
| Otu1306 | 7       | 1       | 0       | 5        | 0       | 6        | 0         | 1         | 5         | 1         | 0         | 6         | Bacteria; Proteobacteria; Alphaproteobacteria; Rickettsiales                                  |
| Otu1301 | 2       | 1       | 0       | 7        | 2       | 3        | 4         | 5         | 3         | 3         | 10        | 0         | Bacteria; WPS-2                                                                               |
| Otu1300 | 0       | 0       | 0       | 10       | 0       | 0        | 0         | 0         | 0         | 0         | 0         | 0         | Bacteria; Proteobacteria; Alphaproteobacteria                                                 |
| Otu1303 | 0       | 0       | 2       | 2        | 0       | 2        | 1         | 2         | 3         | 5         | 11        | 8         | Bacteria; Chlamydiae; Chlamydia; Chlamydiales; Rhabdochlamydiaeae; Candidatus_Rhabdochlamydia |
| Otu1302 | 6       | 6       | 1       | 6        | 5       | 5        | 7         | 0         | 9         | 3         | 11        | 0         | Bacteria; Proteobacteria; Betaproteobacteria; A21b; EB1003                                    |
| Otu1309 | 1       | 3       | 4       | 7        | 12      | 2        | 5         | 3         | 1         | 2         | 5         | 3         | Bacteria; Bacteroidetes; Sphingobacteriia; Sphingobacteriales                                 |
| Otu1308 | 0       | 0       | 1       | 7        | 0       | 0        | 0         | 1         | 2         | 0         | 1         | 0         | Bacteria; Proteobacteria; Deltaproteobacteria; Myxococcales                                   |
| Otu4423 | 0       | 2       | 0       | 0        | 0       | 0        | 0         | 0         | 0         | 0         | 0         | 0         | Bacteria; OD1; ZB2                                                                            |
| Otu3875 | 0       | 0       | 0       | 0        | 0       | 0        | 0         | 0         | 0         | 2         | 0         | 0         | Bacteria; Proteobacteria; Deltaproteobacteria                                                 |
| Otu3874 | 0       | 2       | 0       | 0        | 0       | 0        | 2         | 0         | 0         | 0         | 0         | 0         | Bacteria; Actinobacteria; Actinobacteria; Actinomycetales; Streptomycetales                   |
| Otu4177 | 1       | 2       | 0       | 0        | 3       | 4        | 0         | 0         | 1         | 0         | 2         | 0         | Bacteria; Chloroflexi; Anaerolineae; SBR1031; oc28                                            |
| Otu3877 | 1       | 4       | 2       | 2        | 3       | 0        | 1         | 0         | 0         | 1         | 0         | 0         | Bacteria; Proteobacteria; Deltaproteobacteria; Myxococcales; Haliangiaceae                    |
| Otu4373 | 0       | 0       | 0       | 0        | 0       | 4        | 3         | 0         | 0         | 0         | 0         | 1         | Bacteria; Actinobacteria; Actinobacteria; Actinomycetales; Streptosporangiaceae; Nonomuraea   |
| Otu3876 | 0       | 0       | 0       | 0        | 0       | 0        | 0         | 0         | 0         | 0         | 2         | 0         | Bacteria; TM6; SJA-4                                                                          |
| Otu2649 | 2       | 0       | 0       | 1        | 0       | 0        | 0         | 0         | 0         | 0         | 0         | 0         | Bacteria; TM7; TM7-1                                                                          |
| Otu2648 | 0       | 4       | 1       | 3        | 1       | 2        | 3         | 2         | 2         | 2         | 1         | 2         | Bacteria                                                                                      |

| #OTU ID | Z31DRh1 | Z31DRh2 | Z31DRh3 | Z31DRh4r | Z31DRh5 | Z31DRh6r | Z31J1DRh1 | Z31J1DRh2 | Z31J1DRh3 | Z31J1DRh4 | Z31J1DRh5 | Z31J1DRh6 | taxonomy                                                                                               |
|---------|---------|---------|---------|----------|---------|----------|-----------|-----------|-----------|-----------|-----------|-----------|--------------------------------------------------------------------------------------------------------|
| Otu4372 | 0       | 0       | 0       | 0        | 0       | 0        | 0         | 2         | 0         | 0         | 0         | 0         | Bacteria; Proteobacteria; TA18; PHOS-HD29                                                              |
| Otu2645 | 43      | 8       | 25      | 55       | 31      | 35       | 24        | 9         | 31        | 40        | 13        | 35        | Bacteria; Proteobacteria; Betaproteobacteria; Burkholderiales; Comamonadaceae                          |
| Otu2644 | 0       | 0       | 2       | 0        | 0       | 0        | 2         | 1         | 0         | 1         | 0         | 0         | Bacteria; Armatimonadetes; Armatimonadia; FW68                                                         |
| Otu2647 | 1       | 0       | 0       | 0        | 0       | 0        | 1         | 4         | 0         | 1         | 0         | 0         | Bacteria; FBP                                                                                          |
| Otu2646 | 0       | 0       | 0       | 0        | 0       | 0        | 0         | 0         | 0         | 0         | 2         | 0         | Bacteria; Proteobacteria                                                                               |
| Otu2641 | 0       | 0       | 1       | 1        | 0       | 0        | 2         | 0         | 0         | 2         | 0         | 0         | Bacteria; Acidobacteria; S035                                                                          |
| Otu2640 | 0       | 1       | 0       | 1        | 0       | 3        | 0         | 0         | 2         | 0         | 1         | 0         | Bacteria                                                                                               |
| Otu2643 | 0       | 0       | 0       | 0        | 0       | 0        | 0         | 0         | 0         | 0         | 0         | 2         | Bacteria; Bacteroidetes; Bacteroidia; Bacteroidales; Prevotellaceae; Prevotella; Prevotella_intermedia |
| Otu2642 | 0       | 0       | 0       | 0        | 0       | 0        | 1         | 0         | 0         | 1         | 2         | 0         | Bacteria; Proteobacteria; Gammaproteobacteria; Legionellales                                           |
| Otu4148 | 1       | 1       | 0       | 4        | 1       | 1        | 0         | 0         | 1         | 0         | 0         | 0         | Bacteria; Planctomycetes; Planctomycetia; Gemmatales; Gemmataceae; Gemmata                             |
| Otu4149 | 0       | 0       | 0       | 0        | 0       | 1        | 0         | 0         | 2         | 0         | 0         | 0         | Bacteria; Acidobacteria; Solibacteres; Solibacterales; Solibacteraceae; Candidatus_Solibacter          |
| Otu4279 | 0       | 1       | 0       | 0        | 0       | 0        | 3         | 1         | 0         | 1         | 3         | 0         | Bacteria; OD1; SM2F11                                                                                  |
| Otu3873 | 0       | 0       | 0       | 2        | 0       | 0        | 0         | 0         | 0         | 0         | 0         | 0         | Bacteria; Bacteroidetes; Cytophagia; Cytophagales; Cytophagaceae; Spirosoma                            |
| Otu4140 | 0       | 0       | 2       | 2        | 0       | 0        | 1         | 0         | 0         | 2         | 0         | 0         | Bacteria                                                                                               |
| Otu4141 | 2       | 0       | 0       | 0        | 2       | 2        | 0         | 0         | 0         | 0         | 0         | 0         | Bacteria; Armatimonadetes; Armatimonadia; Armatimonadales; Armatimonadaceae                            |
| Otu4142 | 0       | 2       | 0       | 0        | 0       | 0        | 0         | 0         | 0         | 0         | 0         | 0         | Bacteria; Acidobacteria; Sva0725; Sva0725                                                              |
| Otu3300 | 0       | 0       | 0       | 0        | 0       | 0        | 0         | 0         | 0         | 0         | 2         | 0         | Bacteria; Proteobacteria; Alphaproteobacteria                                                          |
| Otu4144 | 0       | 0       | 2       | 0        | 0       | 0        | 0         | 0         | 0         | 0         | 0         | 0         | Bacteria                                                                                               |
| Otu4145 | 0       | 0       | 0       | 0        | 0       | 2        | 0         | 0         | 0         | 0         | 0         | 0         | Bacteria                                                                                               |
| Otu4146 | 0       | 0       | 0       | 0        | 1       | 1        | 0         | 0         | 1         | 0         | 2         | 0         | Bacteria                                                                                               |
| Otu3416 | 2       | 1       | 0       | 1        | 0       | 0        | 0         | 0         | 0         | 0         | 1         | 0         | Bacteria; Proteobacteria; Gammaproteobacteria                                                          |
| Otu4329 | 0       | 0       | 0       | 0        | 0       | 2        | 0         | 0         | 0         | 0         | 0         | 0         | Bacteria; Proteobacteria; Alphaproteobacteria; Rickettsiales; mitochondria                             |

| #OTU ID | Z31DRh1 | Z31DRh2 | Z31DRh3 | Z31DRh4r | Z31DRh5 | Z31DRh6r | Z31J1DRh1 | Z31J1DRh2 | Z31J1DRh3 | Z31J1DRh4 | Z31J1DRh5 | Z31J1DRh6 | taxonomy                                                                                 |
|---------|---------|---------|---------|----------|---------|----------|-----------|-----------|-----------|-----------|-----------|-----------|------------------------------------------------------------------------------------------|
| Otu4375 | 1       | 2       | 0       | 0        | 0       | 0        | 0         | 0         | 0         | 0         | 0         | 0         | Bacteria; Planctomycetes; Phycisphaerae; WD2101                                          |
| Otu4421 | 0       | 0       | 0       | 1        | 0       | 2        | 1         | 1         | 1         | 1         | 0         | 0         | Bacteria; Tenericutes; Mollicutes; Anaeroplasmatales; Anaeroplasmataceae; Asteroleplasma |
| Otu4374 | 27      | 21      | 15      | 9        | 5       | 14       | 3         | 3         | 3         | 7         | 5         | 1         | Bacteria; Verrucomicrobia; Opitutae; Opitutales; Opitutaceae; Opitutus                   |
| Otu1011 | 0       | 1       | 0       | 0        | 0       | 0        | 0         | 0         | 1         | 9         | 0         | 1         | Bacteria; Proteobacteria; Gammaproteobacteria; Legionellales                             |
| Otu1010 | 1       | 30      | 7       | 20       | 14      | 12       | 15        | 4         | 1         | 14        | 19        | 3         | Bacteria; Planctomycetes; Phycisphaerae; WD2101                                          |
| Otu1013 | 0       | 4       | 3       | 2        | 1       | 4        | 6         | 4         | 13        | 13        | 1         | 0         | Bacteria; FBP                                                                            |
| Otu1012 | 3       | 17      | 7       | 9        | 13      | 8        | 12        | 4         | 2         | 7         | 13        | 3         | Bacteria; Proteobacteria; Gammaproteobacteria; Thiotrichales; Piscirickettsiaceae        |
| Otu1015 | 2       | 20      | 7       | 8        | 10      | 6        | 13        | 2         | 3         | 2         | 14        | 4         | Bacteria; Actinobacteria; Thermoleophilia; Gaiellales; Gaiellaceae                       |
| Otu1014 | 0       | 0       | 0       | 0        | 0       | 6        | 2         | 9         | 8         | 0         | 0         | 0         | Bacteria; Proteobacteria; Gammaproteobacteria; Legionellales                             |
| Otu1017 | 5       | 19      | 7       | 17       | 10      | 6        | 7         | 3         | 6         | 9         | 16        | 3         | Bacteria; Nitrospirae; Nitrospira; Nitrospirales; Nitrospiraceae; Nitrospira             |
| Otu1016 | 15      | 7       | 6       | 10       | 9       | 3        | 1         | 13        | 0         | 3         | 10        | 8         | Bacteria; Proteobacteria; Deltaproteobacteria; Myxococcales                              |
| Otu570  | 0       | 13      | 2       | 5        | 1       | 7        | 5         | 6         | 12        | 3         | 34        | 1         | Bacteria; Proteobacteria; Gammaproteobacteria; Legionellales; Coxiellaceae; Aquicella    |
| Otu571  | 21      | 30      | 20      | 41       | 11      | 19       | 24        | 7         | 5         | 20        | 43        | 3         | Bacteria; Acidobacteria; Solibacteres; Solibacterales                                    |
| Otu572  | 14      | 3       | 15      | 19       | 3       | 31       | 10        | 32        | 15        | 18        | 12        | 14        | Bacteria; WPS-2                                                                          |
| Otu573  | 19      | 12      | 15      | 21       | 4       | 47       | 29        | 14        | 22        | 3         | 7         | 11        | Bacteria; Actinobacteria; Actinobacteria; Actinomycetales; Micromonosporaceae            |
| Otu574  | 5       | 13      | 3       | 10       | 9       | 37       | 24        | 10        | 3         | 5         | 20        | 0         | Bacteria; Chloroflexi; Anaerolineae; SBR1031; oc28                                       |
| Otu575  | 36      | 31      | 24      | 34       | 30      | 42       | 20        | 13        | 5         | 35        | 29        | 13        | Bacteria; Acidobacteria; Chloracidobacteria; DS-100                                      |
| Otu576  | 0       | 0       | 6       | 26       | 23      | 17       | 0         | 9         | 7         | 0         | 0         | 0         | Bacteria; Proteobacteria; Alphaproteobacteria; Rickettsiales                             |
| Otu577  | 8       | 4       | 16      | 26       | 5       | 35       | 15        | 32        | 11        | 8         | 2         | 28        | Bacteria                                                                                 |
| Otu750  | 6       | 1       | 3       | 1        | 2       | 1        | 3         | 8         | 4         | 19        | 4         | 1         | Bacteria                                                                                 |
| Otu751  | 10      | 20      | 4       | 2        | 9       | 8        | 19        | 10        | 4         | 13        | 20        | 6         | Bacteria; Actinobacteria; Thermoleophilia; Gaiellales; Gaiellaceae                       |
| Otu752  | 3       | 1       | 2       | 1        | 0       | 3        | 1         | 3         | 18        | 0         | 0         | 2         | Bacteria; Proteobacteria; Alphaproteobacteria                                            |

| #OTU ID | Z31DRh1 | Z31DRh2 | Z31DRh3 | Z31DRh4r | Z31DRh5 | Z31DRh6r | Z31J1DRh1 | Z31J1DRh2 | Z31J1DRh3 | Z31J1DRh4 | Z31J1DRh5 | Z31J1DRh6 | taxonomy                                                                                       |
|---------|---------|---------|---------|----------|---------|----------|-----------|-----------|-----------|-----------|-----------|-----------|------------------------------------------------------------------------------------------------|
| Otu753  | 36      | 46      | 31      | 56       | 30      | 75       | 33        | 32        | 28        | 53        | 58        | 24        | Bacteria; Planctomycetes; Phycisphaerae; WD2101                                                |
| Otu754  | 0       | 0       | 2       | 4        | 1       | 15       | 0         | 0         | 2         | 2         | 0         | 0         | Bacteria; Verrucomicrobia; Pedosphaerae; Pedosphaerales                                        |
| Otu755  | 0       | 3       | 1       | 0        | 2       | 15       | 1         | 0         | 0         | 0         | 1         | 1         | Bacteria; Proteobacteria; Deltaproteobacteria                                                  |
| Otu756  | 5       | 5       | 12      | 10       | 0       | 19       | 6         | 6         | 5         | 8         | 9         | 4         | Bacteria; Planctomycetes; Planctomycetia; Planctomycetales;<br>Planctomycetaceae; Planctomyces |
| Otu209  | 67      | 88      | 29      | 102      | 55      | 61       | 65        | 79        | 82        | 73        | 76        | 17        | Bacteria; Acidobacteria; Solibacteres; Solibacterales                                          |
| Otu758  | 12      | 47      | 26      | 27       | 22      | 5        | 39        | 41        | 23        | 21        | 24        | 18        | Bacteria; Bacteroidetes; Saprospirae; Saprospirales; Chitinophagaceae                          |
| Otu759  | 8       | 6       | 14      | 5        | 1       | 3        | 15        | 19        | 7         | 10        | 11        | 5         | Bacteria; Proteobacteria; Deltaproteobacteria; Myxococcales                                    |
| Otu976  | 0       | 3       | 0       | 5        | 0       | 0        | 11        | 4         | 0         | 1         | 0         | 0         | Bacteria; Chlamydiae; Chlamydia; Chlamydiales                                                  |
| Otu977  | 6       | 21      | 8       | 21       | 16      | 20       | 14        | 10        | 14        | 7         | 13        | 15        | Bacteria; Actinobacteria; Actinobacteria; Actinomycetales;<br>Micromonosporaceae; Pilmelia     |
| Otu970  | 2       | 3       | 1       | 3        | 1       | 2        | 3         | 17        | 13        | 12        | 10        | 3         | Bacteria; Proteobacteria; Deltaproteobacteria; Myxococcales; Haliangiaceae                     |
| Otu971  | 1       | 5       | 1       | 3        | 1       | 0        | 3         | 6         | 0         | 11        | 1         | 4         | Bacteria; TM7; SC3                                                                             |
| Otu972  | 6       | 2       | 4       | 7        | 3       | 16       | 3         | 7         | 6         | 1         | 3         | 5         | Bacteria; Proteobacteria; Alphaproteobacteria; Rhodospirillales;<br>Acetobacteraceae           |
| Otu201  | 26      | 90      | 47      | 54       | 101     | 244      | 74        | 102       | 90        | 48        | 142       | 34        | Bacteria; Verrucomicrobia; Pedosphaerae; Pedosphaerales; Ellin515                              |
| Otu3062 | 0       | 0       | 0       | 0        | 0       | 0        | 2         | 0         | 0         | 0         | 0         | 0         | Bacteria; Cyanobacteria                                                                        |
| Otu3063 | 0       | 0       | 0       | 0        | 0       | 0        | 0         | 1         | 3         | 0         | 0         | 0         | Bacteria; Bacteroidetes; At12OctB3                                                             |
| Otu3060 | 0       | 4       | 4       | 1        | 0       | 4        | 4         | 1         | 3         | 0         | 6         | 0         | Bacteria; Firmicutes; Clostridia; Clostridiales; Clostridiaceae                                |
| Otu3061 | 0       | 0       | 1       | 2        | 0       | 2        | 0         | 0         | 0         | 3         | 0         | 0         | Bacteria                                                                                       |
| Otu3066 | 0       | 0       | 0       | 2        | 0       | 0        | 0         | 0         | 0         | 0         | 0         | 0         | Bacteria; Proteobacteria                                                                       |
| Otu3067 | 0       | 3       | 0       | 3        | 0       | 1        | 1         | 0         | 0         | 1         | 3         | 1         | Bacteria; Proteobacteria; Deltaproteobacteria; Syntrophobacteriales;<br>Syntrophobacteraceae   |
| Otu3064 | 0       | 2       | 0       | 0        | 0       | 0        | 0         | 0         | 0         | 0         | 0         | 0         | Bacteria; Proteobacteria; Gammaproteobacteria; Legionellales                                   |
| Otu3065 | 1       | 0       | 2       | 0        | 1       | 0        | 2         | 1         | 0         | 1         | 0         | 0         | Bacteria; Proteobacteria; Deltaproteobacteria; Myxococcales; Polyangiaceae                     |
| Otu3068 | 0       | 3       | 0       | 0        | 0       | 0        | 0         | 0         | 0         | 0         | 0         | 0         | Bacteria; Firmicutes; Clostridia; Clostridiales; Peptococcaceae                                |



| #OTU ID | Z31DRh1 | Z31DRh2 | Z31DRh3 | Z31DRh4r | Z31DRh5 | Z31DRh6r | Z31J1DRh1 | Z31J1DRh2 | Z31J1DRh3 | Z31J1DRh4 | Z31J1DRh5 | Z31J1DRh6 | taxonomy                                                                                                                       |
|---------|---------|---------|---------|----------|---------|----------|-----------|-----------|-----------|-----------|-----------|-----------|--------------------------------------------------------------------------------------------------------------------------------|
| Otu3069 | 0       | 0       | 0       | 0        | 2       | 1        | 0         | 0         | 0         | 0         | 1         | 0         | Bacteria; Acidobacteria; Solibacteres; Solibacterales                                                                          |
| Otu3789 | 0       | 0       | 0       | 0        | 0       | 5        | 0         | 0         | 0         | 0         | 0         | 0         | Bacteria; Acidobacteria; Acidobacteriia; Acidobacteriales; Acidobacteriaceae                                                   |
| Otu3764 | 0       | 0       | 0       | 0        | 0       | 2        | 0         | 0         | 0         | 0         | 0         | 0         | Bacteria                                                                                                                       |
| Otu682  | 0       | 0       | 0       | 0        | 0       | 17       | 0         | 0         | 0         | 0         | 0         | 0         | Bacteria; Tenericutes; Mollicutes; Mycoplasmatales; Mycoplasmataceae; Mycoplasma                                               |
| Otu683  | 5       | 5       | 7       | 11       | 1       | 10       | 9         | 22        | 7         | 18        | 8         | 3         | Bacteria; Gemmatimonadetes; Gemmatimonadetes; Ellin5290                                                                        |
| Otu680  | 7       | 0       | 1       | 23       | 0       | 0        | 0         | 1         | 1         | 0         | 0         | 0         | Bacteria; Proteobacteria; Deltaproteobacteria; Bdellovibrionales; Bdellovibrionaceae; Bdellovibrio; Bdellovibrio_bacteriovorus |
| Otu681  | 11      | 1       | 10      | 18       | 0       | 21       | 8         | 2         | 12        | 4         | 2         | 3         | Bacteria; Proteobacteria; Gammaproteobacteria; Legionellales                                                                   |
| Otu686  | 3       | 14      | 5       | 9        | 22      | 25       | 7         | 3         | 3         | 4         | 21        | 1         | Bacteria; Chloroflexi; Anaerolineae; H39                                                                                       |
| Otu687  | 17      | 4       | 7       | 16       | 0       | 4        | 5         | 9         | 16        | 0         | 8         | 2         | Bacteria; Armatimonadetes; Fimbriimonadia; Fimbriimonadales; Fimbriimonadaceae; Fimbriimonas                                   |
| Otu684  | 5       | 17      | 8       | 9        | 19      | 21       | 28        | 19        | 8         | 8         | 20        | 3         | Bacteria; Chloroflexi; Anaerolineae; SBR1031; oc28                                                                             |
| Otu685  | 6       | 12      | 11      | 9        | 15      | 36       | 20        | 20        | 10        | 20        | 25        | 5         | Bacteria; Acidobacteria; Acidobacteria-6; CCU21                                                                                |
| Otu2793 | 0       | 0       | 0       | 2        | 0       | 0        | 0         | 0         | 0         | 0         | 0         | 0         | Bacteria; Firmicutes; Clostridia; Clostridiales                                                                                |
| Otu2792 | 0       | 0       | 4       | 0        | 0       | 1        | 0         | 0         | 0         | 0         | 0         | 0         | Bacteria; Acidobacteria; Solibacteres; Solibacterales                                                                          |
| Otu688  | 0       | 1       | 2       | 8        | 5       | 13       | 8         | 17        | 10        | 1         | 5         | 1         | Bacteria; Chloroflexi; Anaerolineae; SBR1031; oc28                                                                             |
| Otu689  | 18      | 19      | 14      | 34       | 12      | 9        | 14        | 25        | 23        | 24        | 17        | 21        | Bacteria; Proteobacteria; Alphaproteobacteria; Rhodospirillales; Rhodospirillaceae                                             |
| Otu2797 | 0       | 0       | 0       | 0        | 0       | 0        | 0         | 2         | 0         | 0         | 0         | 0         | Bacteria                                                                                                                       |
| Otu2796 | 2       | 0       | 0       | 0        | 0       | 0        | 0         | 0         | 0         | 0         | 0         | 0         | Bacteria; Proteobacteria                                                                                                       |
| Otu2795 | 7       | 6       | 6       | 5        | 9       | 42       | 3         | 21        | 23        | 13        | 18        | 7         | Bacteria; Bacteroidetes; Cytophagia; Cytophagales; Cytophagaceae                                                               |
| Otu2794 | 19      | 24      | 16      | 49       | 19      | 18       | 22        | 19        | 22        | 38        | 41        | 5         | Bacteria; Acidobacteria; Chloracidobacteria; 11-24                                                                             |
| Otu372  | 17      | 4       | 4       | 5        | 9       | 59       | 16        | 22        | 17        | 2         | 16        | 1         | Bacteria                                                                                                                       |
| Otu373  | 14      | 20      | 11      | 20       | 9       | 47       | 22        | 30        | 20        | 17        | 27        | 20        | Bacteria; Proteobacteria; Alphaproteobacteria; Rhodospirillales; Acetobacteraceae                                              |
| Otu370  | 7       | 3       | 2       | 9        | 0       | 42       | 1         | 4         | 0         | 2         | 3         | 2         | Bacteria; Bacteroidetes; Saprospirae; Saprospirales; Chitinophagaceae                                                          |

| #OTU ID | Z31DRh1 | Z31DRh2 | Z31DRh3 | Z31DRh4r | Z31DRh5 | Z31DRh6r | Z31J1DRh1 | Z31J1DRh2 | Z31J1DRh3 | Z31J1DRh4 | Z31J1DRh5 | Z31J1DRh6 | taxonomy                                                                                 |
|---------|---------|---------|---------|----------|---------|----------|-----------|-----------|-----------|-----------|-----------|-----------|------------------------------------------------------------------------------------------|
| Otu371  | 2       | 0       | 1       | 4        | 18      | 49       | 1         | 2         | 1         | 0         | 13        | 0         | Bacteria; Bacteroidetes; Saprospirae; Saprospirales; Chitinophagaceae                    |
| Otu376  | 27      | 39      | 30      | 41       | 47      | 60       | 26        | 26        | 14        | 44        | 68        | 17        | Bacteria; Verrucomicrobia; Pedosphaerae; Pedosphaerales                                  |
| Otu377  | 27      | 34      | 29      | 45       | 20      | 89       | 45        | 29        | 23        | 50        | 29        | 35        | Bacteria; Planctomycetes; Phycisphaerae; WD2101                                          |
| Otu374  | 53      | 16      | 111     | 109      | 29      | 67       | 23        | 29        | 34        | 38        | 23        | 28        | Bacteria; Verrucomicrobia; Spartobacteria; Chthoniobacterales; Chthoniobacteraceae       |
| Otu375  | 16      | 28      | 22      | 40       | 18      | 29       | 20        | 28        | 17        | 57        | 43        | 26        | Bacteria; Gemmatimonadetes; Gemmatimonadetes                                             |
| Otu378  | 13      | 32      | 31      | 47       | 16      | 83       | 46        | 78        | 70        | 42        | 32        | 29        | Bacteria; Planctomycetes; Phycisphaerae; WD2101                                          |
| Otu379  | 73      | 21      | 41      | 109      | 38      | 110      | 49        | 44        | 68        | 86        | 32        | 27        | Bacteria; Bacteroidetes; Saprospirae; Saprospirales; Chitinophagaceae; Sediminibacterium |
| Otu2425 | 4       | 0       | 0       | 0        | 0       | 1        | 1         | 1         | 2         | 0         | 3         | 0         | Bacteria; Firmicutes; Clostridia; Clostridiales; Clostridiaceae; Clostridium             |
| Otu2424 | 0       | 0       | 0       | 2        | 1       | 4        | 0         | 0         | 0         | 0         | 4         | 0         | Bacteria; Bacteroidetes; Saprospirae; Saprospirales; Chitinophagaceae                    |
| Otu2427 | 0       | 0       | 0       | 1        | 2       | 23       | 1         | 30        | 14        | 0         | 0         | 0         | Bacteria; Proteobacteria; Betaproteobacteria                                             |
| Otu2426 | 0       | 0       | 0       | 0        | 0       | 0        | 3         | 0         | 0         | 0         | 0         | 0         | Bacteria; Chlamydiae; Chlamydia; Chlamydiales                                            |
| Otu2421 | 1       | 0       | 0       | 0        | 0       | 1        | 0         | 2         | 0         | 0         | 3         | 0         | Bacteria; Proteobacteria; Alphaproteobacteria                                            |
| Otu2420 | 0       | 2       | 0       | 2        | 2       | 0        | 3         | 2         | 2         | 0         | 5         | 0         | Bacteria; Verrucomicrobia; Pedosphaerae; Pedosphaerales; Ellin517                        |
| Otu2423 | 1       | 3       | 1       | 7        | 0       | 1        | 0         | 0         | 0         | 1         | 1         | 1         | Bacteria; Chloroflexi; Chloroflexi; Roseiflexales                                        |
| Otu2422 | 1       | 2       | 2       | 0        | 0       | 0        | 0         | 0         | 3         | 0         | 2         | 0         | Bacteria; Proteobacteria; Gammaproteobacteria                                            |
| Otu2429 | 2       | 3       | 1       | 1        | 0       | 2        | 1         | 1         | 1         | 0         | 0         | 1         | Bacteria; Planctomycetes; Planctomycetia; Gemmatales; Isosphaeraceae                     |
| Otu2428 | 1       | 0       | 0       | 1        | 1       | 4        | 0         | 1         | 0         | 0         | 0         | 0         | Bacteria; Planctomycetes; Planctomycetia; Gemmatales; Gemmataceae                        |
| Otu2056 | 1       | 3       | 1       | 4        | 4       | 2        | 5         | 3         | 6         | 3         | 1         | 1         | Bacteria; Proteobacteria                                                                 |
| Otu703  | 6       | 38      | 1       | 0        | 2       | 0        | 0         | 1         | 0         | 0         | 0         | 1         | Bacteria; Proteobacteria; Deltaproteobacteria; Myxococcales                              |
| Otu4077 | 2       | 0       | 0       | 0        | 1       | 1        | 0         | 2         | 0         | 0         | 0         | 0         | Bacteria; Proteobacteria; Alphaproteobacteria; Rhodospirillales; Acetobacteraceae        |
| Otu3148 | 0       | 0       | 0       | 0        | 0       | 2        | 0         | 1         | 0         | 0         | 0         | 0         | Bacteria; Proteobacteria; Gammaproteobacteria; Legionellales; Coxiellaceae               |
| Otu702  | 5       | 22      | 7       | 12       | 6       | 5        | 8         | 5         | 0         | 8         | 10        | 0         | Bacteria; Chloroflexi; C0119                                                             |

| #OTU ID | Z31DRh1 | Z31DRh2 | Z31DRh3 | Z31DRh4r | Z31DRh5 | Z31DRh6r | Z31J1DRh1 | Z31J1DRh2 | Z31J1DRh3 | Z31J1DRh4 | Z31J1DRh5 | Z31J1DRh6 | taxonomy                                                                                                            |
|---------|---------|---------|---------|----------|---------|----------|-----------|-----------|-----------|-----------|-----------|-----------|---------------------------------------------------------------------------------------------------------------------|
| Otu3959 | 1       | 0       | 0       | 0        | 0       | 2        | 0         | 1         | 0         | 0         | 0         | 0         | Bacteria; TM7; SC3                                                                                                  |
| Otu4250 | 2       | 0       | 0       | 0        | 0       | 0        | 0         | 1         | 0         | 0         | 0         | 0         | Bacteria; Chlamydiae; Chlamydia; Chlamydiales                                                                       |
| Otu701  | 0       | 2       | 0       | 18       | 2       | 1        | 0         | 0         | 0         | 2         | 0         | 2         | Bacteria                                                                                                            |
| Otu700  | 56      | 10      | 7       | 15       | 31      | 29       | 3         | 8         | 8         | 3         | 12        | 5         | Bacteria; Proteobacteria; Deltaproteobacteria; Myxococcales                                                         |
| Otu198  | 13      | 28      | 27      | 34       | 73      | 159      | 23        | 27        | 17        | 12        | 88        | 15        | Bacteria; Verrucomicrobia; Pedosphaerae; Pedosphaerales; Ellin515                                                   |
| Otu199  | 4       | 93      | 48      | 39       | 79      | 222      | 87        | 133       | 100       | 63        | 127       | 50        | Bacteria; Acidobacteria; Solibacteres; Solibacterales                                                               |
| Otu196  | 11      | 32      | 17      | 96       | 35      | 92       | 24        | 10        | 13        | 22        | 54        | 2         | Bacteria; Chloroflexi; Anaerolineae; SBR1031; oc28                                                                  |
| Otu707  | 15      | 9       | 12      | 16       | 6       | 9        | 13        | 5         | 1         | 3         | 1         | 5         | Bacteria; Verrucomicrobia; Spartobacteria; Chthoniobacteriales; Chthoniobacteraceae; OR-59                          |
| Otu194  | 21      | 19      | 19      | 30       | 13      | 26       | 32        | 29        | 30        | 19        | 129       | 5         | Bacteria; Verrucomicrobia; Pedosphaerae; Pedosphaerales; Ellin517                                                   |
| Otu195  | 50      | 29      | 72      | 111      | 26      | 133      | 35        | 75        | 83        | 40        | 69        | 53        | Bacteria; Planctomycetes; Phycisphaerae; WD2101                                                                     |
| Otu192  | 30      | 15      | 22      | 59       | 28      | 88       | 12        | 8         | 46        | 7         | 17        | 4         | Bacteria; Proteobacteria; Gammaproteobacteria; Legionellales; Coxiellaceae                                          |
| Otu193  | 0       | 0       | 5       | 100      | 15      | 28       | 0         | 2         | 10        | 10        | 7         | 4         | Bacteria; Verrucomicrobia; Pedosphaerae; Pedosphaerales; auto67_4W                                                  |
| Otu190  | 34      | 2       | 1       | 27       | 104     | 4        | 0         | 0         | 82        | 1         | 3         | 4         | Bacteria; Bacteroidetes; Saprospirae; Saprospirales; Chitinophagaceae                                               |
| Otu191  | 34      | 15      | 29      | 27       | 33      | 25       | 66        | 73        | 61        | 106       | 29        | 36        | Bacteria; Gemmatimonadetes; Gemmatimonadetes; Ellin5290                                                             |
| Otu705  | 19      | 1       | 0       | 3        | 5       | 9        | 0         | 0         | 0         | 0         | 0         | 4         | Bacteria; Proteobacteria                                                                                            |
| Otu704  | 5       | 11      | 4       | 8        | 9       | 4        | 3         | 3         | 7         | 20        | 5         | 0         | Bacteria; Bacteroidetes; Saprospirae; Saprospirales; Chitinophagaceae                                               |
| Otu3273 | 0       | 0       | 1       | 0        | 0       | 0        | 2         | 0         | 0         | 1         | 0         | 1         | Bacteria                                                                                                            |
| Otu3272 | 6       | 0       | 1       | 36       | 1       | 2        | 4         | 2         | 1         | 2         | 7         | 19        | Bacteria; Proteobacteria; Betaproteobacteria; Methylophilales; Methylophilaceae; Methylothera; Methylothera_mobilis |
| Otu3271 | 0       | 1       | 0       | 2        | 1       | 1        | 1         | 4         | 1         | 0         | 2         | 0         | Bacteria; Firmicutes; Clostridia; Clostridiales; Clostridiaceae                                                     |
| Otu3270 | 2       | 0       | 0       | 0        | 0       | 0        | 0         | 0         | 0         | 0         | 0         | 0         | Bacteria; Proteobacteria; Deltaproteobacteria; Myxococcales                                                         |
| Otu3277 | 2       | 0       | 0       | 1        | 0       | 0        | 0         | 0         | 0         | 0         | 0         | 0         | Bacteria; Chloroflexi; Anaerolineae; SBR1031                                                                        |
| Otu3276 | 5       | 3       | 0       | 0        | 0       | 0        | 2         | 0         | 0         | 0         | 1         | 0         | Bacteria; Bacteroidetes; Sphingobacteria; Sphingobacteriales                                                        |

| #OTU ID | Z31DRh1 | Z31DRh2 | Z31DRh3 | Z31DRh4r | Z31DRh5 | Z31DRh6r | Z31J1DRh1 | Z31J1DRh2 | Z31J1DRh3 | Z31J1DRh4 | Z31J1DRh5 | Z31J1DRh6 | taxonomy                                                                                          |
|---------|---------|---------|---------|----------|---------|----------|-----------|-----------|-----------|-----------|-----------|-----------|---------------------------------------------------------------------------------------------------|
| Otu1839 | 0       | 0       | 0       | 1        | 2       | 1        | 0         | 0         | 0         | 5         | 1         | 0         | Bacteria; OD1; ZB2                                                                                |
| Otu1838 | 0       | 4       | 2       | 0        | 4       | 1        | 5         | 5         | 2         | 2         | 4         | 0         | Bacteria; Proteobacteria                                                                          |
| Otu1837 | 1       | 5       | 1       | 9        | 7       | 1        | 5         | 0         | 1         | 1         | 12        | 0         | Bacteria; Proteobacteria; Deltaproteobacteria; Myxococcales; Myxococcaceae; Anaeromyxobacter      |
| Otu1836 | 0       | 2       | 0       | 0        | 0       | 0        | 4         | 8         | 2         | 0         | 1         | 1         | Bacteria; Proteobacteria; Gammaproteobacteria; Legionellales; Coxiellaceae; Aquicella             |
| Otu1835 | 1       | 0       | 0       | 0        | 0       | 4        | 0         | 1         | 1         | 0         | 0         | 2         | Bacteria; Acidobacteria; DA052; Ellin6513                                                         |
| Otu1834 | 1       | 0       | 1       | 6        | 1       | 1        | 2         | 0         | 1         | 1         | 0         | 3         | Bacteria; Proteobacteria; Alphaproteobacteria; Rhodospirillales; Rhodospirillaceae                |
| Otu1833 | 1       | 6       | 4       | 0        | 4       | 4        | 5         | 1         | 0         | 5         | 6         | 3         | Bacteria; Verrucomicrobia; Pedosphaerae; Pedosphaerales                                           |
| Otu1832 | 4       | 0       | 2       | 2        | 1       | 0        | 5         | 0         | 1         | 2         | 1         | 0         | Bacteria; Chloroflexi; Anaerolineae; SBR1031; oc28                                                |
| Otu1831 | 0       | 0       | 3       | 2        | 0       | 0        | 0         | 0         | 4         | 0         | 4         | 0         | Bacteria; Proteobacteria; TA18; CV90                                                              |
| Otu1830 | 4       | 4       | 0       | 6        | 0       | 3        | 2         | 4         | 3         | 0         | 0         | 1         | Bacteria; Actinobacteria; Actinobacteria; Actinomycetales; Nocardia; Nocardia; Rhodococcus        |
| Otu996  | 4       | 2       | 4       | 14       | 4       | 11       | 6         | 6         | 14        | 5         | 8         | 4         | Bacteria; Planctomycetes; Phycisphaerae; WD2101                                                   |
| Otu997  | 0       | 1       | 11      | 1        | 4       | 2        | 0         | 0         | 0         | 0         | 8         | 0         | Bacteria; Chloroflexi; Anaerolineae; SBR1031; A4b                                                 |
| Otu994  | 6       | 6       | 6       | 15       | 12      | 23       | 16        | 23        | 6         | 4         | 13        | 4         | Bacteria; Proteobacteria; Alphaproteobacteria; Rhodospirillales; Acetobacteraceae                 |
| Otu995  | 11      | 14      | 6       | 11       | 9       | 10       | 11        | 11        | 8         | 7         | 8         | 4         | Bacteria; Proteobacteria; Deltaproteobacteria; Myxococcales                                       |
| Otu992  | 0       | 0       | 2       | 1        | 12      | 1        | 18        | 10        | 0         | 1         | 1         | 0         | Bacteria; Proteobacteria; Gammaproteobacteria; Legionellales; Coxiellaceae; Aquicella             |
| Otu993  | 9       | 9       | 5       | 16       | 2       | 6        | 8         | 4         | 6         | 1         | 3         | 5         | Bacteria; Proteobacteria; Alphaproteobacteria; Rhodospirillales; Acetobacteraceae                 |
| Otu990  | 4       | 5       | 2       | 12       | 6       | 34       | 19        | 13        | 5         | 3         | 5         | 9         | Bacteria; Planctomycetes; Planctomycetia; Pirellulales; Pirellulaceae                             |
| Otu991  | 0       | 11      | 0       | 0        | 0       | 0        | 0         | 0         | 0         | 0         | 0         | 0         | Bacteria; Bacteroidetes; Sphingobacteriia; Sphingobacteriales                                     |
| Otu2339 | 0       | 0       | 0       | 0        | 0       | 0        | 0         | 0         | 0         | 1         | 4         | 1         | Bacteria; Bacteroidetes; Bacteroidia; Bacteroidales; Prevotellaceae; Prevotella; Prevotella_copri |
| Otu2338 | 0       | 1       | 2       | 0        | 2       | 0        | 0         | 0         | 0         | 1         | 3         | 0         | Bacteria; Chloroflexi; Anaerolineae; SBR1031; A4b                                                 |
| Otu998  | 1       | 0       | 3       | 2        | 1       | 10       | 3         | 4         | 5         | 11        | 0         | 0         | Bacteria; Chloroflexi; Anaerolineae; SBR1031; oc28                                                |
| Otu999  | 0       | 2       | 0       | 9        | 2       | 0        | 0         | 0         | 13        | 0         | 0         | 0         | Bacteria; Proteobacteria                                                                          |

| #OTU ID | Z31DRh1 | Z31DRh2 | Z31DRh3 | Z31DRh4r | Z31DRh5 | Z31DRh6r | Z31J1DRh1 | Z31J1DRh2 | Z31J1DRh3 | Z31J1DRh4 | Z31J1DRh5 | Z31J1DRh6 | taxonomy                                                                                       |
|---------|---------|---------|---------|----------|---------|----------|-----------|-----------|-----------|-----------|-----------|-----------|------------------------------------------------------------------------------------------------|
| Otu1789 | 0       | 3       | 1       | 0        | 1       | 0        | 0         | 0         | 0         | 0         | 7         | 0         | Bacteria; Proteobacteria; Deltaproteobacteria; Myxococcales                                    |
| Otu1788 | 0       | 1       | 1       | 0        | 0       | 5        | 1         | 1         | 0         | 0         | 0         | 0         | Bacteria; Verrucomicrobia; Spartobacteria; Chthoniobacteriales; Chthoniobacteraceae            |
| Otu2254 | 3       | 4       | 0       | 2        | 0       | 0        | 0         | 0         | 0         | 0         | 1         | 0         | Bacteria; Acidobacteria; S035                                                                  |
| Otu2255 | 0       | 3       | 2       | 2        | 0       | 3        | 0         | 0         | 1         | 1         | 1         | 0         | Bacteria; TM6; SJA-4                                                                           |
| Otu2252 | 0       | 0       | 0       | 0        | 0       | 0        | 0         | 0         | 3         | 0         | 3         | 0         | Bacteria; Cyanobacteria; 4Cod-2; MLE1-12                                                       |
| Otu2253 | 0       | 0       | 0       | 0        | 0       | 4        | 1         | 1         | 1         | 1         | 0         | 0         | Bacteria; Armatimonadetes; Fimbriimonadia; Fimbriimonadales; Fimbriimonadaceae; Fimbriimonas   |
| Otu2250 | 0       | 1       | 1       | 0        | 0       | 0        | 3         | 0         | 0         | 0         | 2         | 0         | Bacteria; Proteobacteria; Gammaproteobacteria; Legionellales                                   |
| Otu2251 | 2       | 1       | 1       | 4        | 3       | 3        | 1         | 0         | 0         | 2         | 3         | 0         | Bacteria; Nitrospirae; Nitrospira; Nitrospirales; Nitrospiraceae; JG37-AG-70                   |
| Otu1781 | 2       | 4       | 1       | 4        | 3       | 13       | 1         | 5         | 0         | 0         | 0         | 5         | Bacteria; Actinobacteria; Actinobacteria; Actinomycetales; Actinosynnemataceae                 |
| Otu1780 | 0       | 0       | 3       | 7        | 1       | 0        | 0         | 1         | 0         | 0         | 0         | 0         | Bacteria; Proteobacteria; Gammaproteobacteria; Legionellales; Coxiellaceae                     |
| Otu1783 | 4       | 14      | 8       | 6        | 5       | 16       | 7         | 11        | 7         | 6         | 15        | 9         | Bacteria; Proteobacteria; Alphaproteobacteria; Rhizobiales; Hyphomicrobiaceae; Rhodoplanes     |
| Otu1782 | 0       | 2       | 1       | 4        | 2       | 0        | 0         | 0         | 0         | 2         | 1         | 1         | Bacteria; WS3; PRR-12; Sediment-1                                                              |
| Otu1785 | 1       | 0       | 0       | 0        | 0       | 5        | 0         | 0         | 0         | 0         | 0         | 0         | Bacteria; Proteobacteria; Alphaproteobacteria; Rhizobiales                                     |
| Otu1784 | 4       | 0       | 3       | 10       | 0       | 3        | 0         | 1         | 3         | 1         | 0         | 4         | Bacteria; Armatimonadetes; Armatimonadia; FW68                                                 |
| Otu1787 | 0       | 0       | 0       | 0        | 0       | 0        | 0         | 0         | 0         | 0         | 8         | 0         | Bacteria; OD1                                                                                  |
| Otu1786 | 0       | 0       | 0       | 0        | 1       | 6        | 0         | 3         | 0         | 0         | 5         | 0         | Bacteria; Proteobacteria; TA18; CV90                                                           |
| Otu3879 | 0       | 0       | 1       | 2        | 0       | 2        | 0         | 0         | 0         | 0         | 0         | 1         | Bacteria; Proteobacteria; Alphaproteobacteria; Rhizobiales                                     |
| Otu3878 | 0       | 0       | 0       | 0        | 4       | 0        | 0         | 0         | 0         | 0         | 0         | 0         | Bacteria; Bacteroidetes; Saprospirae; Saprospirales; Chitinophagaceae                          |
| Otu3309 | 0       | 0       | 0       | 0        | 0       | 0        | 0         | 2         | 0         | 0         | 0         | 0         | Bacteria                                                                                       |
| Otu3308 | 0       | 0       | 0       | 0        | 0       | 0        | 0         | 0         | 0         | 0         | 2         | 0         | Bacteria; Chlamydiae; Chlamydia; Chlamydiales; Rhabdochlamydiaceae; Candidatus_Rhabdochlamydia |
| Otu3307 | 0       | 0       | 0       | 0        | 0       | 0        | 0         | 0         | 0         | 0         | 2         | 0         | Bacteria; Proteobacteria; Gammaproteobacteria; Legionellales; Coxiellaceae                     |
| Otu3306 | 2       | 1       | 3       | 3        | 1       | 11       | 5         | 6         | 5         | 4         | 2         | 1         | Bacteria; Proteobacteria; Alphaproteobacteria; Caulobacteriales; Caulobacteraceae              |

| #OTU ID | Z31DRh1 | Z31DRh2 | Z31DRh3 | Z31DRh4r | Z31DRh5 | Z31DRh6r | Z31J1DRh1 | Z31J1DRh2 | Z31J1DRh3 | Z31J1DRh4 | Z31J1DRh5 | Z31J1DRh6 | taxonomy                                                                                                               |
|---------|---------|---------|---------|----------|---------|----------|-----------|-----------|-----------|-----------|-----------|-----------|------------------------------------------------------------------------------------------------------------------------|
| Otu3305 | 0       | 2       | 1       | 2        | 0       | 1        | 0         | 0         | 0         | 3         | 0         | 0         | Bacteria; Proteobacteria; Deltaproteobacteria; Myxococcales                                                            |
| Otu3304 | 0       | 0       | 0       | 2        | 0       | 0        | 0         | 0         | 0         | 0         | 0         | 0         | Bacteria; Tenericutes; Mollicutes; Anaeroplasmatales; Anaeroplasmataceae; Asteroleplasma                               |
| Otu3303 | 0       | 1       | 1       | 0        | 0       | 3        | 4         | 1         | 0         | 1         | 2         | 0         | Bacteria; Planctomycetes; BD7-11                                                                                       |
| Otu3302 | 1       | 2       | 3       | 2        | 0       | 6        | 1         | 3         | 4         | 1         | 3         | 0         | Bacteria; Planctomycetes; Planctomycetia; Gemmatales; Isosphaeraeae                                                    |
| Otu3301 | 2       | 0       | 0       | 0        | 0       | 1        | 1         | 2         | 0         | 0         | 1         | 0         | Bacteria; Acidobacteria; Acidobacteriia; Acidobacteriales; Koribacteraceae                                             |
| Otu2481 | 0       | 0       | 0       | 0        | 3       | 0        | 0         | 0         | 1         | 0         | 1         | 0         | Bacteria; Tenericutes; Mollicutes; Anaeroplasmatales; Anaeroplasmataceae; Asteroleplasma                               |
| Otu3364 | 0       | 0       | 0       | 1        | 0       | 2        | 0         | 0         | 0         | 2         | 0         | 1         | Bacteria; TM7; TM7-1                                                                                                   |
| Otu3649 | 0       | 1       | 0       | 4        | 2       | 0        | 1         | 0         | 0         | 0         | 1         | 0         | Bacteria; Elusimicrobia; Elusimicrobia; FAC88                                                                          |
| Otu3897 | 0       | 0       | 0       | 0        | 0       | 0        | 5         | 2         | 1         | 0         | 1         | 0         | Bacteria; Proteobacteria; Gammaproteobacteria                                                                          |
| Otu3896 | 0       | 0       | 0       | 2        | 1       | 1        | 0         | 0         | 0         | 0         | 0         | 3         | Bacteria; Armatimonadetes; 0319-6E2                                                                                    |
| Otu3895 | 0       | 2       | 0       | 0        | 0       | 0        | 0         | 0         | 0         | 0         | 0         | 0         | Bacteria; Bacteroidetes; Saprospirae; Saprospirales; Chitinophagaceae                                                  |
| Otu3894 | 0       | 0       | 0       | 0        | 0       | 3        | 0         | 0         | 0         | 0         | 0         | 0         | Bacteria; Verrucomicrobia; Verrucomicrobiae; Verrucomicrobiales; Verrucomicrobiaceae                                   |
| Otu3893 | 0       | 0       | 0       | 2        | 0       | 0        | 0         | 0         | 1         | 0         | 0         | 1         | Bacteria; Proteobacteria; Gammaproteobacteria                                                                          |
| Otu3892 | 0       | 1       | 2       | 6        | 0       | 1        | 2         | 1         | 0         | 0         | 1         | 0         | Bacteria; Cyanobacteria; 4C0d-2; MLE1-12                                                                               |
| Otu3891 | 0       | 0       | 0       | 2        | 0       | 0        | 0         | 0         | 0         | 0         | 0         | 0         | Bacteria                                                                                                               |
| Otu3890 | 0       | 0       | 0       | 0        | 0       | 0        | 0         | 0         | 0         | 0         | 2         | 0         | Bacteria; Acidobacteria                                                                                                |
| Otu3899 | 0       | 0       | 0       | 2        | 0       | 0        | 0         | 0         | 0         | 0         | 0         | 0         | Bacteria                                                                                                               |
| Otu3898 | 0       | 0       | 0       | 0        | 0       | 0        | 4         | 0         | 0         | 0         | 0         | 0         | Bacteria; Proteobacteria; Gammaproteobacteria; Pasteurellales; Pasteurellaceae; Aggregatibacter; Aggregatibacter_segis |
| Otu1657 | 0       | 8       | 4       | 1        | 1       | 6        | 6         | 3         | 2         | 1         | 20        | 0         | Bacteria; Gemmatimonadetes; Gemm-1                                                                                     |
| Otu1656 | 0       | 0       | 0       | 0        | 0       | 5        | 0         | 0         | 0         | 0         | 0         | 0         | Bacteria; Bacteroidetes; Flavobacteriia; Flavobacteriales; Flavobacteriaceae; Flavobacterium                           |
| Otu1655 | 0       | 4       | 0       | 0        | 0       | 0        | 1         | 1         | 2         | 0         | 4         | 0         | Bacteria; Proteobacteria; Alphaproteobacteria; Rhizobiales                                                             |
| Otu1654 | 0       | 0       | 0       | 0        | 0       | 0        | 0         | 0         | 0         | 0         | 4         | 0         | Bacteria; OD1; Mb-NB09                                                                                                 |

| #OTU ID | Z31DRh1 | Z31DRh2 | Z31DRh3 | Z31DRh4r | Z31DRh5 | Z31DRh6r | Z31J1DRh1 | Z31J1DRh2 | Z31J1DRh3 | Z31J1DRh4 | Z31J1DRh5 | Z31J1DRh6 | taxonomy                                                                                           |
|---------|---------|---------|---------|----------|---------|----------|-----------|-----------|-----------|-----------|-----------|-----------|----------------------------------------------------------------------------------------------------|
| Otu1653 | 2       | 8       | 3       | 5        | 3       | 3        | 3         | 1         | 0         | 3         | 8         | 2         | Bacteria; Armatimonadetes; 0319-6E2                                                                |
| Otu1652 | 0       | 3       | 0       | 0        | 0       | 0        | 1         | 0         | 0         | 3         | 6         | 0         | Bacteria; Planctomycetes; Phycisphaerae; Phycisphaerales                                           |
| Otu1651 | 0       | 0       | 0       | 0        | 0       | 5        | 0         | 1         | 0         | 2         | 1         | 2         | Bacteria; Proteobacteria; Deltaproteobacteria; Bdellovibrionales; Bdellovibrionaceae; Bdellovibrio |
| Otu1650 | 3       | 4       | 3       | 1        | 0       | 5        | 3         | 0         | 3         | 4         | 6         | 3         | Bacteria; Acidobacteria; Acidobacteria-6; iii1-15                                                  |
| Otu1659 | 5       | 10      | 2       | 8        | 3       | 7        | 8         | 6         | 9         | 8         | 5         | 4         | Bacteria; Proteobacteria; Betaproteobacteria                                                       |
| Otu1658 | 52      | 66      | 39      | 109      | 50      | 215      | 55        | 38        | 29        | 32        | 48        | 29        | Bacteria; Actinobacteria; Actinobacteria; Actinomycetales; Streptomycetaceae                       |
| Otu2021 | 0       | 0       | 0       | 0        | 0       | 2        | 3         | 1         | 3         | 0         | 4         | 0         | Bacteria; Proteobacteria; Gammaproteobacteria; Xanthomonadales; Sinobacteraceae                    |
| Otu3915 | 0       | 0       | 0       | 2        | 0       | 0        | 0         | 0         | 0         | 0         | 0         | 0         | Bacteria                                                                                           |
| Otu2020 | 0       | 2       | 1       | 0        | 1       | 1        | 1         | 0         | 0         | 1         | 5         | 0         | Bacteria; Verrucomicrobia; Pedosphaerae; Pedosphaerales                                            |
| Otu3140 | 12      | 5       | 2       | 3        | 8       | 12       | 7         | 3         | 2         | 1         | 2         | 1         | Bacteria; Verrucomicrobia; Opiritutae; Opiritutales; Opiritutaceae; Opiritutus                     |
| Otu2023 | 2       | 6       | 0       | 0        | 3       | 0        | 10        | 2         | 0         | 0         | 0         | 0         | Bacteria; TM7                                                                                      |
| Otu3829 | 0       | 0       | 0       | 2        | 0       | 1        | 0         | 0         | 0         | 0         | 0         | 0         | Bacteria; Proteobacteria; Gammaproteobacteria; Legionellales; Legionellaceae                       |
| Otu2022 | 0       | 0       | 1       | 2        | 4       | 0        | 1         | 0         | 0         | 3         | 0         | 0         | Bacteria; Planctomycetes; Phycisphaerae; WD2101                                                    |
| Otu2025 | 2       | 0       | 1       | 0        | 0       | 0        | 2         | 0         | 0         | 0         | 0         | 3         | Bacteria                                                                                           |
| Otu2024 | 0       | 4       | 0       | 0        | 0       | 0        | 2         | 1         | 0         | 2         | 2         | 1         | Bacteria                                                                                           |
| Otu3105 | 2       | 1       | 1       | 1        | 0       | 0        | 2         | 3         | 0         | 0         | 1         | 0         | Bacteria; Bacteroidetes; Cytophagia; Cytophagales; Cytophagaceae; Sporocytophaga                   |
| Otu1538 | 1       | 5       | 2       | 5        | 1       | 6        | 3         | 5         | 1         | 4         | 1         | 0         | Bacteria                                                                                           |
| Otu1539 | 2       | 2       | 1       | 2        | 0       | 12       | 2         | 5         | 0         | 1         | 4         | 3         | Bacteria; Planctomycetes; Planctomycetia; Planctomycetales; Planctomycetaceae; Planctomyces        |
| Otu2027 | 4       | 0       | 0       | 0        | 0       | 0        | 0         | 0         | 3         | 0         | 0         | 3         | Bacteria; Bacteroidetes; Flavobacteriia; Flavobacteriales; Cryomorphaeae                           |
| Otu49   | 498     | 678     | 548     | 941      | 646     | 823      | 802       | 928       | 688       | 914       | 907       | 285       | Bacteria; Acidobacteria; Acidobacteriia; Acidobacteriales; Koribacteraceae                         |
| Otu48   | 189     | 38      | 189     | 89       | 14      | 622      | 323       | 62        | 2         | 54        | 3         | 152       | Bacteria; Bacteroidetes; Flavobacteriia; Flavobacteriales; Weeksellaceae; Chryseobacterium         |
| Otu47   | 22      | 1       | 2       | 15       | 8       | 465      | 42        | 13        | 0         | 3         | 0         | 6         | Bacteria; Bacteroidetes; Saprospirae; Saprospirales; Chitinophagaceae                              |

| #OTU ID | Z31DRh1 | Z31DRh2 | Z31DRh3 | Z31DRh4r | Z31DRh5 | Z31DRh6r | Z31J1DRh1 | Z31J1DRh2 | Z31J1DRh3 | Z31J1DRh4 | Z31J1DRh5 | Z31J1DRh6 | taxonomy                                                                                                                 |
|---------|---------|---------|---------|----------|---------|----------|-----------|-----------|-----------|-----------|-----------|-----------|--------------------------------------------------------------------------------------------------------------------------|
| Otu46   | 214     | 1118    | 135     | 348      | 229     | 216      | 237       | 59        | 39        | 168       | 201       | 65        | Bacteria; Acidobacteria; Chloracidobacteria; RB41                                                                        |
| Otu45   | 472     | 152     | 465     | 1199     | 320     | 383      | 427       | 107       | 353       | 617       | 95        | 406       | Bacteria; Proteobacteria; Betaproteobacteria; Burkholderiales; Comamonadaceae                                            |
| Otu44   | 415     | 200     | 330     | 807      | 138     | 202      | 279       | 51        | 164       | 170       | 37        | 505       | Bacteria; Proteobacteria; Betaproteobacteria; Burkholderiales; Oxalobacteraceae; Cupriavidus                             |
| Otu43   | 123     | 54      | 81      | 647      | 171     | 224      | 35        | 58        | 22        | 86        | 56        | 57        | Bacteria; Proteobacteria; Betaproteobacteria; Burkholderiales; Comamonadaceae; Comamonas                                 |
| Otu42   | 233     | 118     | 110     | 297      | 67      | 495      | 138       | 45        | 91        | 201       | 30        | 100       | Bacteria; Proteobacteria; Alphaproteobacteria; Sphingomonadales; Sphingomonadaceae; Sphingomonas; Sphingomonas_wittichii |
| Otu41   | 11      | 8       | 2       | 2        | 9       | 528      | 4         | 3         | 9         | 5         | 4         | 9         | Bacteria; Bacteroidetes; Saprospirae; Saprospirales; Chitinophagaceae                                                    |
| Otu40   | 154     | 734     | 109     | 218      | 300     | 130      | 253       | 67        | 33        | 107       | 242       | 61        | Bacteria; Acidobacteria; Chloracidobacteria; RB41                                                                        |
| Otu4196 | 0       | 0       | 0       | 0        | 2       | 0        | 0         | 0         | 2         | 0         | 0         | 0         | Bacteria; Planctomycetes; Planctomycetia; Planctomycetales; Planctomycetaceae; Planctomyces                              |
| Otu2924 | 0       | 0       | 0       | 0        | 2       | 0        | 0         | 0         | 0         | 0         | 0         | 0         | Bacteria                                                                                                                 |
| Otu2925 | 0       | 2       | 0       | 0        | 0       | 0        | 1         | 0         | 0         | 0         | 0         | 0         | Bacteria; Chloroflexi; Anaerolineae; SBR1031; SHA-31                                                                     |
| Otu2926 | 0       | 0       | 2       | 2        | 2       | 0        | 1         | 0         | 0         | 0         | 1         | 0         | Bacteria; Proteobacteria; Deltaproteobacteria; Myxococcales                                                              |
| Otu2736 | 0       | 0       | 0       | 0        | 1       | 2        | 0         | 0         | 0         | 0         | 0         | 0         | Bacteria; Planctomycetes; Planctomycetia; Gemmatales; Gemmataceae                                                        |
| Otu2920 | 0       | 0       | 2       | 0        | 0       | 0        | 0         | 0         | 0         | 0         | 0         | 0         | Bacteria; Planctomycetes; Planctomycetia; Gemmatales; Gemmataceae                                                        |
| Otu2921 | 2       | 0       | 0       | 2        | 0       | 0        | 0         | 1         | 0         | 0         | 0         | 0         | Bacteria; Armatimonadetes; Chthonomonadetes; Chthonomonadales; Chthonomonadaceae                                         |
| Otu2922 | 0       | 0       | 3       | 0        | 0       | 0        | 0         | 0         | 0         | 0         | 0         | 0         | Bacteria; Cyanobacteria; ML635J-21                                                                                       |
| Otu2923 | 12      | 4       | 5       | 69       | 9       | 1        | 0         | 1         | 4         | 1         | 0         | 9         | Bacteria; Bacteroidetes; Saprospirae; Saprospirales; Chitinophagaceae; Chitinophaga                                      |
| Otu4005 | 0       | 0       | 0       | 0        | 0       | 0        | 0         | 0         | 0         | 0         | 0         | 3         | Bacteria; Proteobacteria; Gammaproteobacteria                                                                            |
| Otu4004 | 35      | 4       | 15      | 32       | 13      | 57       | 0         | 10        | 5         | 0         | 3         | 19        | Bacteria; Bacteroidetes; Saprospirae; Saprospirales; Chitinophagaceae                                                    |
| Otu4007 | 0       | 2       | 0       | 0        | 0       | 0        | 0         | 0         | 0         | 0         | 0         | 0         | Bacteria; Proteobacteria; Deltaproteobacteria; Syntrophobacteriales; Syntrophobacteraceae                                |
| Otu3367 | 0       | 0       | 0       | 0        | 0       | 0        | 0         | 0         | 0         | 3         | 0         | 0         | Bacteria; Proteobacteria; Deltaproteobacteria; Myxococcales                                                              |
| Otu2928 | 0       | 0       | 0       | 2        | 0       | 0        | 0         | 0         | 0         | 0         | 0         | 0         | Bacteria; Proteobacteria; Alphaproteobacteria; Rhizobiales                                                               |
| Otu2929 | 0       | 0       | 0       | 2        | 0       | 0        | 0         | 0         | 0         | 0         | 0         | 0         | Bacteria; Proteobacteria                                                                                                 |



| #OTU ID | Z31DRh1 | Z31DRh2 | Z31DRh3 | Z31DRh4r | Z31DRh5 | Z31DRh6r | Z31J1DRh1 | Z31J1DRh2 | Z31J1DRh3 | Z31J1DRh4 | Z31J1DRh5 | Z31J1DRh6 | taxonomy                                                                                             |
|---------|---------|---------|---------|----------|---------|----------|-----------|-----------|-----------|-----------|-----------|-----------|------------------------------------------------------------------------------------------------------|
| Otu4002 | 0       | 0       | 0       | 0        | 0       | 0        | 0         | 0         | 2         | 0         | 0         | 0         | Bacteria; Proteobacteria; Alphaproteobacteria; Rhodospirillales; Rhodospirillaceae; Telmatospirillum |
| Otu1226 | 1       | 9       | 0       | 0        | 9       | 19       | 7         | 10        | 10        | 1         | 10        | 4         | Bacteria; Planctomycetes; Planctomycetia; Planctomycetales; Planctomycetaceae; Planctomyces          |
| Otu1227 | 3       | 0       | 0       | 4        | 4       | 9        | 2         | 3         | 3         | 1         | 2         | 1         | Bacteria; Planctomycetes; Planctomycetia; Gemmatales; Gemmataceae                                    |
| Otu1224 | 0       | 0       | 0       | 0        | 3       | 0        | 1         | 2         | 0         | 15        | 0         | 3         | Bacteria; Chlamydiae; Chlamydia; Chlamydiales                                                        |
| Otu1225 | 1       | 7       | 1       | 2        | 1       | 1        | 1         | 1         | 0         | 3         | 1         | 0         | Bacteria; Verrucomicrobia; Spartobacteria; Chthoniobacteriales; Chthoniobacteraceae; DA101           |
| Otu1222 | 1       | 2       | 0       | 2        | 0       | 11       | 0         | 3         | 2         | 1         | 0         | 7         | Bacteria; Proteobacteria; Gammaproteobacteria; Legionellales; Coxiellaceae                           |
| Otu1223 | 5       | 25      | 6       | 6        | 10      | 13       | 4         | 7         | 6         | 11        | 7         | 1         | Bacteria; Acidobacteria; Chloracidobacteria                                                          |
| Otu1220 | 1       | 9       | 6       | 7        | 2       | 0        | 5         | 1         | 2         | 7         | 12        | 3         | Bacteria; Proteobacteria; Betaproteobacteria; Burkholderiales; Alcaligenaceae                        |
| Otu1221 | 13      | 10      | 10      | 5        | 7       | 30       | 15        | 26        | 12        | 11        | 10        | 11        | Bacteria; Planctomycetes; Planctomycetia; Gemmatales; Isosphaeraceae                                 |
| Otu4190 | 0       | 1       | 0       | 0        | 0       | 0        | 0         | 0         | 0         | 0         | 2         | 0         | Bacteria; Armatimonadetes; 0319-6E2                                                                  |
| Otu1228 | 5       | 4       | 4       | 4        | 6       | 8        | 7         | 1         | 1         | 3         | 7         | 2         | Bacteria; Proteobacteria; Deltaproteobacteria; Syntrophobacteriales; Syntrophobacteraceae            |
| Otu1229 | 1       | 4       | 5       | 9        | 0       | 3        | 6         | 2         | 0         | 2         | 11        | 0         | Bacteria; Proteobacteria; Betaproteobacteria; A21b; UD5                                              |
| Otu3993 | 0       | 1       | 0       | 2        | 0       | 0        | 0         | 0         | 0         | 0         | 1         | 0         | Bacteria; Proteobacteria; Deltaproteobacteria; NB1-j; NB1-i                                          |
| Otu3145 | 0       | 0       | 0       | 0        | 0       | 0        | 0         | 0         | 0         | 0         | 3         | 0         | Bacteria; Proteobacteria                                                                             |
| Otu4209 | 0       | 0       | 0       | 1        | 0       | 0        | 2         | 0         | 0         | 0         | 0         | 0         | Bacteria                                                                                             |
| Otu4208 | 0       | 0       | 0       | 0        | 0       | 0        | 0         | 2         | 0         | 0         | 0         | 0         | Bacteria; Cyanobacteria                                                                              |
| Otu3144 | 0       | 0       | 0       | 0        | 0       | 2        | 0         | 0         | 0         | 0         | 0         | 0         | Bacteria; Planctomycetes; Planctomycetia; Gemmatales; Gemmataceae; Gemmata                           |
| Otu3479 | 1       | 2       | 0       | 6        | 2       | 6        | 3         | 3         | 1         | 1         | 0         | 0         | Bacteria; Planctomycetes; Phycisphaerae; WD2101                                                      |
| Otu3478 | 1       | 0       | 0       | 0        | 1       | 0        | 2         | 0         | 1         | 2         | 0         | 0         | Bacteria; Proteobacteria; Deltaproteobacteria; Myxococcales                                          |
| Otu4206 | 0       | 0       | 0       | 0        | 0       | 0        | 2         | 1         | 1         | 0         | 0         | 0         | Bacteria; OD1; ZB2                                                                                   |
| Otu3471 | 0       | 0       | 0       | 0        | 0       | 2        | 0         | 0         | 2         | 0         | 0         | 1         | Bacteria; Proteobacteria                                                                             |
| Otu3470 | 0       | 0       | 0       | 0        | 0       | 2        | 1         | 0         | 0         | 0         | 0         | 0         | Bacteria; Planctomycetes; Planctomycetia; Gemmatales; Gemmataceae                                    |

| #OTU ID | Z31DRh1 | Z31DRh2 | Z31DRh3 | Z31DRh4r | Z31DRh5 | Z31DRh6r | Z31J1DRh1 | Z31J1DRh2 | Z31J1DRh3 | Z31J1DRh4 | Z31J1DRh5 | Z31J1DRh6 | taxonomy                                                                                           |
|---------|---------|---------|---------|----------|---------|----------|-----------|-----------|-----------|-----------|-----------|-----------|----------------------------------------------------------------------------------------------------|
| Otu3473 | 2       | 0       | 0       | 0        | 0       | 0        | 0         | 0         | 0         | 0         | 0         | 0         | Bacteria; Chloroflexi; Anaerolineae; SBR1031; oc28                                                 |
| Otu3472 | 0       | 0       | 0       | 0        | 0       | 0        | 1         | 0         | 0         | 2         | 1         | 0         | Bacteria; OD1; ZB2                                                                                 |
| Otu3475 | 0       | 2       | 0       | 0        | 0       | 0        | 0         | 0         | 0         | 0         | 0         | 0         | Bacteria; Proteobacteria; Deltaproteobacteria; FAC87                                               |
| Otu3474 | 0       | 0       | 0       | 1        | 0       | 1        | 1         | 0         | 0         | 2         | 0         | 0         | Bacteria; Chloroflexi; Anaerolineae; GCA004                                                        |
| Otu3477 | 0       | 2       | 0       | 0        | 0       | 0        | 0         | 3         | 0         | 0         | 0         | 2         | Bacteria; Proteobacteria; Deltaproteobacteria; Myxococcales                                        |
| Otu3476 | 0       | 2       | 0       | 0        | 0       | 1        | 0         | 2         | 1         | 1         | 2         | 0         | Bacteria; OP3; PBS-25                                                                              |
| Otu1312 | 3       | 19      | 7       | 13       | 49      | 44       | 19        | 11        | 8         | 6         | 22        | 7         | Bacteria; Proteobacteria; Alphaproteobacteria; Rhizobiales; Hyphomicrobiaceae; Rhodoplanes         |
| Otu1313 | 0       | 5       | 0       | 0        | 2       | 7        | 5         | 5         | 8         | 3         | 1         | 0         | Bacteria; Verrucomicrobia; Pedosphaerae; Pedosphaerales; Pedosphaeraceae; Pedosphaera              |
| Otu1310 | 3       | 5       | 2       | 7        | 5       | 9        | 7         | 8         | 10        | 7         | 11        | 4         | Bacteria; Planctomycetes; BD7-11                                                                   |
| Otu1311 | 0       | 0       | 0       | 0        | 0       | 0        | 7         | 0         | 1         | 0         | 0         | 0         | Bacteria                                                                                           |
| Otu1316 | 5       | 2       | 7       | 6        | 6       | 11       | 5         | 16        | 7         | 6         | 3         | 3         | Bacteria; Proteobacteria; Gammaproteobacteria; Legionellales; Coxiellaceae                         |
| Otu1317 | 0       | 9       | 2       | 9        | 0       | 0        | 0         | 0         | 7         | 0         | 0         | 1         | Bacteria; Proteobacteria; Betaproteobacteria                                                       |
| Otu1314 | 4       | 1       | 4       | 8        | 1       | 8        | 5         | 4         | 2         | 12        | 3         | 3         | Bacteria; Planctomycetes; Planctomycetia; Pirellulales; Pirellulaceae; Pirellula                   |
| Otu1315 | 2       | 5       | 1       | 7        | 1       | 10       | 5         | 10        | 9         | 4         | 4         | 3         | Bacteria; Actinobacteria; Acidimicrobiia; Acidimicrobiales; EB1017                                 |
| Otu4203 | 23      | 1       | 17      | 58       | 13      | 2        | 39        | 3         | 11        | 6         | 2         | 28        | Bacteria; Proteobacteria; Betaproteobacteria; Burkholderiales; Oxalobacteraceae                    |
| Otu1318 | 1       | 12      | 15      | 6        | 11      | 2        | 6         | 2         | 3         | 1         | 10        | 0         | Bacteria; Proteobacteria; Deltaproteobacteria; Myxococcales; Haliangiaceae                         |
| Otu1319 | 10      | 8       | 14      | 19       | 10      | 34       | 25        | 13        | 16        | 21        | 16        | 9         | Bacteria; Proteobacteria; Betaproteobacteria; Burkholderiales; Oxalobacteraceae; Janthinobacterium |
| Otu4202 | 1       | 0       | 1       | 3        | 3       | 7        | 5         | 1         | 1         | 0         | 4         | 1         | Bacteria; Planctomycetes; Phycisphaerae; WD2101                                                    |
| Otu4201 | 0       | 0       | 0       | 0        | 0       | 0        | 0         | 0         | 0         | 0         | 2         | 0         | Bacteria                                                                                           |
| Otu4217 | 0       | 0       | 1       | 2        | 0       | 0        | 0         | 0         | 0         | 0         | 1         | 0         | Bacteria; Bacteroidetes; Sphingobacteriia; Sphingobacteriales                                      |
| Otu4200 | 0       | 0       | 0       | 0        | 0       | 0        | 0         | 0         | 0         | 2         | 0         | 0         | Bacteria; Actinobacteria                                                                           |
| Otu3612 | 0       | 0       | 1       | 0        | 0       | 3        | 4         | 0         | 2         | 0         | 1         | 3         | Bacteria; Planctomycetes; Planctomycetia; Gemmatales; Isosphaeraceae                               |

| #OTU ID | Z31DRh1 | Z31DRh2 | Z31DRh3 | Z31DRh4r | Z31DRh5 | Z31DRh6r | Z31J1DRh1 | Z31J1DRh2 | Z31J1DRh3 | Z31J1DRh4 | Z31J1DRh5 | Z31J1DRh6 | taxonomy                                                                                                         |
|---------|---------|---------|---------|----------|---------|----------|-----------|-----------|-----------|-----------|-----------|-----------|------------------------------------------------------------------------------------------------------------------|
| Otu3783 | 8       | 38      | 19      | 29       | 37      | 23       | 23        | 16        | 10        | 7         | 22        | 7         | Bacteria; Verrucomicrobia; Spartobacteria; Chthoniobacterales; Chthoniobacteraceae; DA101                        |
| Otu3782 | 0       | 0       | 0       | 0        | 1       | 0        | 0         | 0         | 0         | 0         | 2         | 0         | Bacteria; OD1; ZB2                                                                                               |
| Otu2658 | 0       | 0       | 0       | 0        | 0       | 0        | 0         | 0         | 0         | 0         | 2         | 0         | Bacteria; OP3; PBS-25                                                                                            |
| Otu2659 | 1       | 0       | 2       | 3        | 0       | 1        | 3         | 1         | 0         | 4         | 0         | 1         | Bacteria; Gemmatimonadetes; Gemmatimonadetes                                                                     |
| Otu3787 | 0       | 2       | 0       | 0        | 0       | 0        | 0         | 0         | 0         | 0         | 0         | 0         | Bacteria                                                                                                         |
| Otu3786 | 0       | 0       | 0       | 0        | 0       | 0        | 0         | 0         | 0         | 0         | 0         | 2         | Bacteria; Proteobacteria; Deltaproteobacteria; Bdellovibrionales; Bdellovibrionaceae; Bdellovibrio               |
| Otu3785 | 0       | 0       | 0       | 2        | 0       | 0        | 0         | 0         | 0         | 0         | 0         | 0         | Bacteria                                                                                                         |
| Otu3784 | 0       | 0       | 0       | 0        | 0       | 0        | 0         | 0         | 2         | 0         | 0         | 0         | Bacteria; Armatimonadetes; 0319-6E2                                                                              |
| Otu2652 | 0       | 0       | 0       | 0        | 0       | 0        | 0         | 0         | 0         | 0         | 2         | 0         | Bacteria; Proteobacteria; Deltaproteobacteria; MIZ46                                                             |
| Otu2653 | 1       | 0       | 2       | 3        | 0       | 0        | 0         | 0         | 1         | 4         | 1         | 0         | Bacteria; Proteobacteria; Alphaproteobacteria; Caulobacterales; Caulobacteraceae                                 |
| Otu2650 | 0       | 3       | 0       | 1        | 3       | 3        | 4         | 2         | 0         | 0         | 0         | 1         | Bacteria; Chloroflexi; Chloroflexi; Roseiflexales                                                                |
| Otu2651 | 0       | 0       | 0       | 0        | 0       | 0        | 2         | 0         | 0         | 0         | 0         | 0         | Bacteria; Proteobacteria; Gammaproteobacteria; Legionellales                                                     |
| Otu2656 | 5       | 2       | 14      | 4        | 3       | 4        | 4         | 0         | 6         | 4         | 0         | 5         | Bacteria; Verrucomicrobia; Spartobacteria; Chthoniobacterales; Chthoniobacteraceae                               |
| Otu2657 | 16      | 5       | 6       | 29       | 10      | 28       | 20        | 30        | 29        | 12        | 19        | 14        | Bacteria; Acidobacteria; Acidobacteriia; Acidobacteriales; Koribacteraceae; Candidatus_Koribacter                |
| Otu2654 | 0       | 0       | 0       | 0        | 0       | 0        | 2         | 0         | 1         | 1         | 0         | 0         | Bacteria; Bacteroidetes; Cytophagia; Cytophagales; Amoebophilaceae; Candidatus_Amoebophilus                      |
| Otu2655 | 0       | 0       | 0       | 0        | 0       | 0        | 2         | 0         | 0         | 0         | 0         | 0         | Bacteria; Verrucomicrobia; Pedosphaerae; Pedosphaerales                                                          |
| Otu567  | 4       | 2       | 12      | 24       | 0       | 1        | 5         | 4         | 2         | 2         | 1         | 1         | Bacteria; Verrucomicrobia; Spartobacteria; Chthoniobacterales; Chthoniobacteraceae; Candidatus_Xiphinematobacter |
| Otu566  | 1       | 5       | 8       | 37       | 2       | 12       | 10        | 8         | 26        | 6         | 5         | 5         | Bacteria; Verrucomicrobia; Spartobacteria; Chthoniobacterales; Chthoniobacteraceae                               |
| Otu565  | 2       | 2       | 5       | 8        | 0       | 36       | 2         | 7         | 11        | 5         | 3         | 1         | Bacteria; Bacteroidetes; Cytophagia; Cytophagales; Cytophagaceae                                                 |
| Otu564  | 34      | 14      | 11      | 20       | 13      | 4        | 31        | 15        | 2         | 9         | 11        | 1         | Bacteria; Bacteroidetes; Saprospirae; Saprospirales; Chitinophagaceae                                            |
| Otu563  | 11      | 6       | 9       | 29       | 5       | 11       | 1         | 24        | 4         | 8         | 2         | 4         | Bacteria; Proteobacteria; Deltaproteobacteria; Myxococcales; Polyangiaceae                                       |
| Otu562  | 12      | 14      | 3       | 14       | 7       | 16       | 4         | 2         | 1         | 15        | 2         | 23        | Bacteria; Bacteroidetes; Saprospirae; Saprospirales; Chitinophagaceae                                            |

| #OTU ID | Z31DRh1 | Z31DRh2 | Z31DRh3 | Z31DRh4r | Z31DRh5 | Z31DRh6r | Z31J1DRh1 | Z31J1DRh2 | Z31J1DRh3 | Z31J1DRh4 | Z31J1DRh5 | Z31J1DRh6 | taxonomy                                                                                                                     |
|---------|---------|---------|---------|----------|---------|----------|-----------|-----------|-----------|-----------|-----------|-----------|------------------------------------------------------------------------------------------------------------------------------|
| Otu561  | 3       | 1       | 3       | 3        | 8       | 19       | 3         | 1         | 43        | 0         | 5         | 16        | Bacteria; Proteobacteria; Deltaproteobacteria; Myxococcales; Polyangiaceae                                                   |
| Otu560  | 0       | 13      | 12      | 10       | 8       | 22       | 7         | 15        | 18        | 10        | 9         | 2         | Bacteria; Proteobacteria; Gammaproteobacteria; Legionellales; Coxiellaceae                                                   |
| Otu569  | 13      | 27      | 2       | 21       | 21      | 10       | 12        | 5         | 9         | 10        | 25        | 4         | Bacteria; Chloroflexi; Anaerolineae; GCA004                                                                                  |
| Otu568  | 4       | 6       | 10      | 27       | 14      | 25       | 19        | 17        | 13        | 18        | 11        | 10        | Bacteria; Proteobacteria; Alphaproteobacteria; Rhodospirillales; Rhodospirillaceae                                           |
| Otu3480 | 0       | 3       | 0       | 3        | 5       | 7        | 1         | 0         | 0         | 3         | 4         | 1         | Bacteria; Planctomycetes; Phycisphaerae; WD2101                                                                              |
| Otu4160 | 1       | 0       | 1       | 2        | 2       | 1        | 2         | 1         | 0         | 0         | 0         | 1         | Bacteria; Gemmatimonadetes; Gemm-1                                                                                           |
| Otu1008 | 0       | 0       | 0       | 2        | 0       | 0        | 1         | 6         | 13        | 0         | 0         | 0         | Bacteria; Proteobacteria                                                                                                     |
| Otu1009 | 5       | 4       | 6       | 5        | 5       | 12       | 5         | 5         | 8         | 15        | 7         | 7         | Bacteria; Gemmatimonadetes; Gemmatimonadetes; Ellin5290                                                                      |
| Otu1006 | 0       | 0       | 1       | 10       | 0       | 1        | 0         | 0         | 0         | 0         | 0         | 6         | Bacteria; Proteobacteria; Deltaproteobacteria; Myxococcales; Cystobacterineae                                                |
| Otu1007 | 9       | 1       | 2       | 11       | 3       | 19       | 12        | 0         | 4         | 9         | 2         | 2         | Bacteria; Proteobacteria; Alphaproteobacteria; Sphingomonadales; Sphingomonadaceae; Sphingomonas; Sphingomonas_changbaiensis |
| Otu1004 | 0       | 9       | 0       | 2        | 9       | 0        | 0         | 3         | 0         | 0         | 0         | 1         | Bacteria; Proteobacteria                                                                                                     |
| Otu1005 | 11      | 21      | 16      | 22       | 24      | 52       | 19        | 43        | 18        | 22        | 22        | 9         | Bacteria; Acidobacteria; Acidobacteriia; Acidobacteriales; Koribacteraceae; Candidatus_Koribacter                            |
| Otu1002 | 1       | 7       | 4       | 5        | 9       | 17       | 11        | 0         | 5         | 0         | 8         | 8         | Bacteria; Bacteroidetes; Saprospirae; Saprospirales; Chitinophagaceae; Chitinophaga                                          |
| Otu1003 | 0       | 0       | 0       | 0        | 0       | 5        | 0         | 0         | 0         | 1         | 10        | 0         | Bacteria; Proteobacteria; Alphaproteobacteria; Rickettsiales; mitochondria                                                   |
| Otu1000 | 3       | 0       | 10      | 0        | 1       | 3        | 1         | 3         | 9         | 3         | 5         | 0         | Bacteria; Gemmatimonadetes; Gemmatimonadetes                                                                                 |
| Otu1001 | 7       | 2       | 7       | 14       | 2       | 19       | 5         | 8         | 10        | 2         | 9         | 3         | Bacteria; Actinobacteria; Thermoleophilia; Gaiellales                                                                        |
| Otu4311 | 0       | 0       | 0       | 0        | 0       | 0        | 2         | 1         | 0         | 0         | 0         | 0         | Bacteria; OD1; ZB2                                                                                                           |
| Otu969  | 0       | 0       | 0       | 9        | 0       | 0        | 0         | 0         | 0         | 0         | 0         | 0         | Bacteria; Fusobacteria; Fusobacteriia; Fusobacteriales; Fusobacteriaceae; Fusobacterium                                      |
| Otu968  | 1       | 12      | 1       | 4        | 11      | 11       | 3         | 3         | 2         | 7         | 12        | 2         | Bacteria                                                                                                                     |
| Otu219  | 34      | 31      | 28      | 41       | 46      | 118      | 16        | 14        | 19        | 26        | 24        | 5         | Bacteria; Chloroflexi; Chloroflexi; Roseiflexales; Kouleothrixaceae                                                          |
| Otu218  | 24      | 0       | 3       | 96       | 101     | 15       | 4         | 4         | 1         | 5         | 0         | 3         | Bacteria; Bacteroidetes; Saprospirae; Saprospirales; Chitinophagaceae                                                        |
| Otu749  | 1       | 2       | 1       | 8        | 0       | 22       | 2         | 0         | 0         | 3         | 0         | 4         | Bacteria; Bacteroidetes; Saprospirae; Saprospirales; Chitinophagaceae                                                        |

| #OTU ID | Z31DRh1 | Z31DRh2 | Z31DRh3 | Z31DRh4r | Z31DRh5 | Z31DRh6r | Z31J1DRh1 | Z31J1DRh2 | Z31J1DRh3 | Z31J1DRh4 | Z31J1DRh5 | Z31J1DRh6 | taxonomy                                                                                      |
|---------|---------|---------|---------|----------|---------|----------|-----------|-----------|-----------|-----------|-----------|-----------|-----------------------------------------------------------------------------------------------|
| Otu748  | 0       | 0       | 1       | 3        | 3       | 16       | 1         | 5         | 1         | 0         | 3         | 2         | Bacteria; Proteobacteria; Alphaproteobacteria; Rhodospirillales; Rhodospirillaceae            |
| Otu747  | 0       | 8       | 1       | 18       | 0       | 0        | 0         | 0         | 0         | 0         | 2         | 0         | Bacteria; Armatimonadetes; Chthonomonadetes; SJA-22                                           |
| Otu962  | 1       | 1       | 0       | 12       | 2       | 10       | 0         | 0         | 0         | 0         | 0         | 3         | Bacteria; Bacteroidetes; Saprospirae; Saprospirales; Chitinophagaceae                         |
| Otu745  | 1       | 0       | 2       | 1        | 14      | 5        | 1         | 0         | 1         | 5         | 20        | 0         | Bacteria; Chloroflexi; Anaerolineae; CFB-26                                                   |
| Otu744  | 9       | 4       | 2       | 0        | 1       | 6        | 0         | 20        | 0         | 0         | 2         | 0         | Bacteria; Proteobacteria                                                                      |
| Otu967  | 2       | 14      | 1       | 1        | 7       | 9        | 0         | 1         | 11        | 2         | 7         | 3         | Bacteria; Planctomycetes; Phycisphaerae                                                       |
| Otu966  | 4       | 4       | 4       | 2        | 10      | 19       | 7         | 5         | 6         | 11        | 11        | 4         | Bacteria; Planctomycetes; Planctomycetia; Gemmatales; Gemmataceae; Gemmata                    |
| Otu965  | 9       | 1       | 2       | 7        | 5       | 30       | 7         | 6         | 2         | 9         | 6         | 8         | Bacteria; Proteobacteria; Alphaproteobacteria; Rhizobiales; Hyphomicrobiaceae; Hyphomicrobium |
| Otu964  | 6       | 22      | 13      | 11       | 0       | 0        | 10        | 8         | 2         | 6         | 4         | 0         | Bacteria; TM6; SJA-4                                                                          |
| Otu1532 | 3       | 0       | 6       | 2        | 5       | 6        | 9         | 7         | 4         | 0         | 2         | 0         | Bacteria; Cyanobacteria; Chloroplast; Stramenopiles                                           |
| Otu3486 | 1       | 1       | 2       | 1        | 2       | 3        | 1         | 1         | 0         | 1         | 1         | 2         | Bacteria; Proteobacteria; Gammaproteobacteria                                                 |
| Otu3099 | 0       | 0       | 0       | 0        | 0       | 0        | 2         | 0         | 0         | 0         | 2         | 0         | Bacteria; Proteobacteria; Gammaproteobacteria; Alteromonadales; 211ds20                       |
| Otu1533 | 17      | 29      | 28      | 38       | 19      | 67       | 29        | 45        | 28        | 14        | 41        | 12        | Bacteria; Proteobacteria; Alphaproteobacteria; Rhodospirillales; Acetobacteraceae             |
| Otu3097 | 0       | 2       | 0       | 0        | 0       | 0        | 0         | 0         | 0         | 0         | 0         | 0         | Bacteria                                                                                      |
| Otu3096 | 0       | 6       | 0       | 0        | 1       | 3        | 0         | 0         | 3         | 0         | 1         | 1         | Bacteria; Planctomycetes; Planctomycetia; Planctomycetales; Planctomycetaceae; Planctomyces   |
| Otu3095 | 0       | 2       | 0       | 0        | 0       | 0        | 0         | 0         | 0         | 0         | 0         | 0         | Bacteria; Actinobacteria; Thermoleophilia; Gaiellales                                         |
| Otu1180 | 12      | 10      | 5       | 8        | 5       | 9        | 4         | 3         | 1         | 5         | 8         | 0         | Bacteria; Chloroflexi; Anaerolineae; Anaerolineales; Anaerolinaceae                           |
| Otu2055 | 0       | 2       | 0       | 0        | 1       | 1        | 0         | 1         | 0         | 0         | 0         | 7         | Bacteria; Bacteroidetes; Saprospirae; Saprospirales; Chitinophagaceae                         |
| Otu1530 | 3       | 8       | 1       | 0        | 1       | 5        | 6         | 5         | 2         | 8         | 2         | 2         | Bacteria; Bacteroidetes; Sphingobacteriia; Sphingobacteriales                                 |
| Otu3091 | 0       | 0       | 0       | 0        | 0       | 0        | 1         | 0         | 0         | 0         | 0         | 2         | Bacteria; Acidobacteria; Acidobacteriia; Acidobacteriales; Koribacteraceae                    |
| Otu3090 | 0       | 0       | 0       | 0        | 0       | 0        | 0         | 4         | 0         | 0         | 0         | 0         | Bacteria; Tenericutes; Mollicutes; Anaeroplasmatales; Anaeroplasmataceae; Asteroleplasma      |
| Otu691  | 7       | 23      | 15      | 12       | 14      | 9        | 10        | 11        | 14        | 9         | 10        | 4         | Bacteria; Proteobacteria; Deltaproteobacteria; Myxococcales                                   |

| #OTU ID | Z31DRh1 | Z31DRh2 | Z31DRh3 | Z31DRh4r | Z31DRh5 | Z31DRh6r | Z31J1DRh1 | Z31J1DRh2 | Z31J1DRh3 | Z31J1DRh4 | Z31J1DRh5 | Z31J1DRh6 | taxonomy                                                                                          |
|---------|---------|---------|---------|----------|---------|----------|-----------|-----------|-----------|-----------|-----------|-----------|---------------------------------------------------------------------------------------------------|
| Otu690  | 47      | 9       | 10      | 20       | 56      | 196      | 11        | 7         | 20        | 20        | 15        | 0         | Bacteria; Cyanobacteria; Chloroplast; Stramenopiles                                               |
| Otu693  | 2       | 20      | 2       | 14       | 4       | 12       | 2         | 5         | 7         | 3         | 28        | 0         | Bacteria; Proteobacteria; Gammaproteobacteria; Xanthomonadales                                    |
| Otu692  | 16      | 9       | 14      | 21       | 4       | 9        | 15        | 16        | 20        | 23        | 21        | 7         | Bacteria; Gemmatimonadetes; Gemmatimonadetes; Gemmatimonadales                                    |
| Otu695  | 4       | 1       | 0       | 0        | 0       | 4        | 0         | 0         | 21        | 0         | 0         | 7         | Bacteria; Bacteroidetes; Flavobacteriia; Flavobacteriales; Cryomorphaeae; Fluvicola               |
| Otu694  | 0       | 0       | 0       | 0        | 0       | 0        | 0         | 0         | 0         | 22        | 3         | 1         | Bacteria; Proteobacteria; Betaproteobacteria; Hydrogenophilales; Hydrogenophilaceae; Thiobacillus |
| Otu697  | 4       | 1       | 6       | 8        | 2       | 23       | 3         | 4         | 3         | 2         | 6         | 16        | Bacteria; Actinobacteria; Actinobacteria; Actinomycetales; Micrococcaceae; Sinomonas              |
| Otu696  | 7       | 4       | 9       | 21       | 2       | 9        | 5         | 3         | 5         | 6         | 5         | 1         | Bacteria; Acidobacteria; Solibacteres; Solibacterales                                             |
| Otu699  | 11      | 1       | 2       | 5        | 9       | 21       | 28        | 22        | 8         | 7         | 5         | 6         | Bacteria; Chloroflexi; Ktedonobacteria; Ktedonobacteriales; Ktedonobacteraceae                    |
| Otu698  | 14      | 2       | 1       | 1        | 2       | 17       | 0         | 1         | 0         | 2         | 7         | 1         | Bacteria; Proteobacteria; Alphaproteobacteria                                                     |
| Otu2782 | 0       | 2       | 0       | 0        | 0       | 1        | 0         | 0         | 0         | 2         | 3         | 0         | Bacteria; Proteobacteria; Alphaproteobacteria                                                     |
| Otu2783 | 0       | 0       | 0       | 0        | 0       | 0        | 0         | 0         | 0         | 0         | 0         | 2         | Bacteria                                                                                          |
| Otu2784 | 8       | 8       | 22      | 10       | 11      | 8        | 17        | 17        | 17        | 5         | 15        | 5         | Bacteria; Proteobacteria; Betaproteobacteria; SC-I-84                                             |
| Otu2785 | 0       | 0       | 0       | 1        | 0       | 4        | 2         | 4         | 3         | 4         | 0         | 1         | Bacteria; Planctomycetes; Planctomycetia; Gemmatales; Isosphaeraceae                              |
| Otu2786 | 0       | 0       | 0       | 0        | 2       | 4        | 2         | 1         | 0         | 3         | 0         | 0         | Bacteria; Acidobacteria; Acidobacteriia; Acidobacteriales; Koribacteraceae; Candidatus_Koribacter |
| Otu1537 | 0       | 4       | 0       | 2        | 0       | 0        | 1         | 0         | 0         | 5         | 3         | 0         | Bacteria; Chloroflexi; C0119                                                                      |
| Otu361  | 15      | 13      | 9       | 24       | 6       | 52       | 12        | 16        | 12        | 6         | 11        | 5         | Bacteria; Armatimonadetes; 0319-6E2                                                               |
| Otu360  | 20      | 6       | 15      | 37       | 17      | 44       | 5         | 7         | 5         | 7         | 8         | 5         | Bacteria; Verrucomicrobia; Pedosphaerae; Pedosphaerales; auto67_4W                                |
| Otu363  | 30      | 57      | 28      | 34       | 22      | 71       | 59        | 53        | 23        | 23        | 11        | 16        | Bacteria; Planctomycetes; Planctomycetia; Pirellulales; Pirellulaceae; Pirellula                  |
| Otu362  | 42      | 77      | 40      | 37       | 21      | 32       | 42        | 22        | 23        | 53        | 76        | 21        | Bacteria; Gemmatimonadetes; Gemmatimonadetes; Gemmatimonadales; Ellin5301                         |
| Otu365  | 31      | 6       | 24      | 77       | 13      | 27       | 26        | 7         | 24        | 8         | 4         | 21        | Bacteria; Proteobacteria; Alphaproteobacteria; Rhizobiales                                        |
| Otu364  | 16      | 32      | 22      | 17       | 19      | 61       | 31        | 45        | 44        | 26        | 23        | 19        | Bacteria; Verrucomicrobia; Pedosphaerae; Pedosphaerales                                           |
| Otu367  | 29      | 51      | 43      | 79       | 62      | 94       | 66        | 47        | 34        | 95        | 59        | 21        | Bacteria; Planctomycetes; Phycisphaerae; WD2101                                                   |

| #OTU ID | Z31DRh1 | Z31DRh2 | Z31DRh3 | Z31DRh4r | Z31DRh5 | Z31DRh6r | Z31J1DRh1 | Z31J1DRh2 | Z31J1DRh3 | Z31J1DRh4 | Z31J1DRh5 | Z31J1DRh6 | taxonomy                                                                                  |
|---------|---------|---------|---------|----------|---------|----------|-----------|-----------|-----------|-----------|-----------|-----------|-------------------------------------------------------------------------------------------|
| Otu366  | 12      | 15      | 15      | 24       | 16      | 53       | 30        | 40        | 25        | 22        | 9         | 15        | Bacteria; Proteobacteria; Deltaproteobacteria; Myxococcales                               |
| Otu369  | 3       | 4       | 1       | 52       | 2       | 11       | 4         | 9         | 3         | 1         | 1         | 4         | Bacteria; Bacteroidetes; Saprospirae; Saprospirales; Chitinophagaceae                     |
| Otu368  | 22      | 22      | 8       | 6        | 15      | 6        | 3         | 12        | 45        | 3         | 57        | 1         | Bacteria; Bacteroidetes; Cytophagia; Cytophagales; Cytophagaceae                          |
| Otu1535 | 2       | 2       | 0       | 1        | 5       | 3        | 2         | 0         | 5         | 0         | 3         | 8         | Bacteria; Bacteroidetes; Cytophagia; Cytophagales; Cytophagaceae                          |
| Otu1344 | 1       | 1       | 1       | 4        | 3       | 14       | 1         | 7         | 4         | 7         | 4         | 4         | Bacteria; Planctomycetes; Phycisphaerae; Phycisphaerales                                  |
| Otu2432 | 2       | 6       | 4       | 2        | 2       | 0        | 2         | 0         | 0         | 4         | 2         | 0         | Bacteria; Acidobacteria; Acidobacteria-5                                                  |
| Otu2433 | 1       | 5       | 3       | 2        | 0       | 3        | 4         | 0         | 1         | 1         | 0         | 0         | Bacteria; Actinobacteria; Thermoleophilia; Solirubrobacterales; Patulibacteraceae         |
| Otu2430 | 0       | 0       | 0       | 0        | 1       | 5        | 2         | 0         | 4         | 0         | 2         | 0         | Bacteria; Proteobacteria; Alphaproteobacteria                                             |
| Otu2431 | 2       | 0       | 1       | 2        | 0       | 8        | 0         | 2         | 1         | 0         | 2         | 1         | Bacteria; Planctomycetes; Planctomycetia; Gemmatales; Isosphaeraceae                      |
| Otu2436 | 0       | 0       | 3       | 0        | 0       | 0        | 0         | 0         | 0         | 0         | 0         | 0         | Bacteria; Verrucomicrobia                                                                 |
| Otu2437 | 1       | 0       | 0       | 0        | 0       | 0        | 0         | 5         | 0         | 0         | 0         | 0         | Bacteria; Proteobacteria                                                                  |
| Otu2434 | 0       | 0       | 0       | 0        | 0       | 0        | 4         | 0         | 0         | 0         | 0         | 0         | Bacteria; Chloroflexi; Anaerolineae; Caldilineales; Caldilineaceae                        |
| Otu2435 | 3       | 0       | 3       | 2        | 2       | 1        | 5         | 3         | 7         | 4         | 1         | 3         | Bacteria; Proteobacteria; Betaproteobacteria; Burkholderiales; Comamonadaceae             |
| Otu2438 | 0       | 3       | 0       | 0        | 0       | 0        | 3         | 0         | 0         | 0         | 0         | 0         | Bacteria; Proteobacteria; Deltaproteobacteria; Myxococcales; Nannocystaceae; Plesiocystis |
| Otu2439 | 1       | 1       | 1       | 1        | 1       | 0        | 0         | 0         | 5         | 0         | 2         | 0         | Bacteria; Proteobacteria; Deltaproteobacteria; Myxococcales; Haliangiaceae                |
| Otu3351 | 0       | 0       | 0       | 1        | 0       | 2        | 0         | 0         | 0         | 0         | 0         | 1         | Bacteria; Proteobacteria; Gammaproteobacteria; Legionellales                              |
| Otu189  | 5       | 3       | 8       | 122      | 6       | 19       | 1         | 1         | 2         | 5         | 0         | 2         | Bacteria; Acidobacteria; Acidobacteria; Acidobacteriales; Acidobacteriaceae; Terriglobus  |
| Otu188  | 51      | 68      | 56      | 66       | 46      | 78       | 61        | 36        | 37        | 57        | 101       | 30        | Bacteria; Gemmatimonadetes; Gemm-1                                                        |
| Otu185  | 51      | 6       | 7       | 20       | 9       | 100      | 1         | 25        | 57        | 6         | 11        | 36        | Bacteria; Proteobacteria; Deltaproteobacteria; Myxococcales                               |
| Otu184  | 50      | 44      | 87      | 117      | 23      | 94       | 92        | 85        | 79        | 115       | 92        | 84        | Bacteria; Gemmatimonadetes; Gemmatimonadetes; Gemmatimonadales                            |
| Otu187  | 3       | 2       | 1       | 14       | 9       | 90       | 5         | 5         | 9         | 8         | 9         | 12        | Bacteria; Chloroflexi; Ktedonobacteria                                                    |
| Otu186  | 55      | 34      | 43      | 47       | 3       | 24       | 2         | 23        | 113       | 2         | 17        | 52        | Bacteria; Bacteroidetes; Saprospirae; Saprospirales; Chitinophagaceae; Flaviumibacter     |

| #OTU ID | Z31DRh1 | Z31DRh2 | Z31DRh3 | Z31DRh4r | Z31DRh5 | Z31DRh6r | Z31J1DRh1 | Z31J1DRh2 | Z31J1DRh3 | Z31J1DRh4 | Z31J1DRh5 | Z31J1DRh6 | taxonomy                                                                                                                 |
|---------|---------|---------|---------|----------|---------|----------|-----------|-----------|-----------|-----------|-----------|-----------|--------------------------------------------------------------------------------------------------------------------------|
| Otu181  | 40      | 22      | 22      | 60       | 57      | 110      | 45        | 70        | 82        | 57        | 18        | 88        | Bacteria; Proteobacteria; Betaproteobacteria; Methylophilales                                                            |
| Otu180  | 132     | 8       | 12      | 22       | 7       | 112      | 9         | 4         | 2         | 4         | 1         | 8         | Bacteria; Bacteroidetes; Saprospirae; Saprospirales; Chitinophagaceae                                                    |
| Otu183  | 54      | 16      | 21      | 176      | 12      | 4        | 112       | 16        | 55        | 130       | 0         | 116       | Bacteria; Firmicutes; Bacilli; Bacillales; Paenibacillaceae; Paenibacillus                                               |
| Otu182  | 78      | 147     | 53      | 54       | 231     | 189      | 6         | 21        | 81        | 61        | 70        | 77        | Bacteria; Bacteroidetes; Flavobacteriia; Flavobacteriales; Flavobacteriaceae; Flavobacterium; Flavobacterium_succinicans |
| Otu3260 | 1       | 2       | 0       | 4        | 1       | 0        | 3         | 0         | 0         | 0         | 1         | 0         | Bacteria; Firmicutes; Clostridia; OPB54                                                                                  |
| Otu3261 | 0       | 3       | 0       | 0        | 0       | 0        | 0         | 0         | 0         | 0         | 0         | 0         | Bacteria; Proteobacteria; Betaproteobacteria; Burkholderiales; Comamonadaceae                                            |
| Otu3262 | 0       | 0       | 0       | 0        | 0       | 0        | 0         | 0         | 0         | 2         | 0         | 0         | Bacteria; Proteobacteria; Alphaproteobacteria; Rickettsiales; Rickettsiaceae                                             |
| Otu3263 | 2       | 0       | 0       | 0        | 0       | 0        | 0         | 0         | 0         | 0         | 0         | 0         | Bacteria; Firmicutes; Clostridia; Clostridiales; Clostridiaceae; Clostridium                                             |
| Otu1828 | 1       | 0       | 0       | 2        | 1       | 6        | 0         | 1         | 0         | 0         | 1         | 0         | Bacteria; Armatimonadetes; OPB50                                                                                         |
| Otu1829 | 1       | 3       | 3       | 5        | 0       | 5        | 1         | 1         | 0         | 0         | 4         | 1         | Bacteria; Armatimonadetes; 0319-6E2                                                                                      |
| Otu3266 | 0       | 0       | 0       | 0        | 0       | 0        | 2         | 0         | 0         | 0         | 0         | 0         | Bacteria; Actinobacteria; Actinobacteria; Actinomycetales; Pseudonocardiaaceae                                           |
| Otu3267 | 0       | 0       | 0       | 0        | 0       | 0        | 0         | 0         | 0         | 0         | 2         | 0         | Bacteria; Proteobacteria                                                                                                 |
| Otu1824 | 1       | 3       | 1       | 1        | 2       | 3        | 5         | 7         | 6         | 0         | 7         | 2         | Bacteria; AD3; ABS-6                                                                                                     |
| Otu1825 | 3       | 5       | 2       | 3        | 2       | 6        | 0         | 0         | 1         | 1         | 3         | 0         | Bacteria; Actinobacteria; Thermoleophilia; Gaiellales                                                                    |
| Otu1826 | 4       | 0       | 1       | 0        | 1       | 0        | 1         | 0         | 0         | 0         | 0         | 0         | Bacteria; Proteobacteria; Gammaproteobacteria; Legionellales                                                             |
| Otu1827 | 8       | 3       | 5       | 7        | 3       | 21       | 5         | 7         | 9         | 8         | 6         | 6         | Bacteria; Proteobacteria; Alphaproteobacteria; Rhizobiales                                                               |
| Otu1820 | 0       | 0       | 0       | 0        | 0       | 4        | 0         | 0         | 0         | 0         | 0         | 0         | Bacteria; Proteobacteria                                                                                                 |
| Otu1821 | 1       | 1       | 0       | 2        | 0       | 4        | 1         | 0         | 1         | 0         | 3         | 0         | Bacteria; Proteobacteria; Deltaproteobacteria; FAC87                                                                     |
| Otu1822 | 1       | 13      | 2       | 10       | 3       | 6        | 8         | 6         | 1         | 10        | 5         | 1         | Bacteria; Actinobacteria; Thermoleophilia; Gaiellales; Gaiellaceae                                                       |
| Otu1823 | 1       | 3       | 0       | 4        | 2       | 0        | 0         | 2         | 0         | 0         | 1         | 1         | Bacteria; Actinobacteria; Actinobacteria; Actinomycetales; Thermomonosporaceae                                           |
| Otu985  | 1       | 2       | 0       | 11       | 0       | 2        | 1         | 2         | 0         | 1         | 0         | 1         | Bacteria; Proteobacteria                                                                                                 |
| Otu984  | 1       | 0       | 3       | 1        | 3       | 0        | 1         | 10        | 2         | 4         | 6         | 0         | Bacteria; Proteobacteria; Gammaproteobacteria; Legionellales                                                             |



| #OTU ID | Z31DRh1 | Z31DRh2 | Z31DRh3 | Z31DRh4r | Z31DRh5 | Z31DRh6r | Z31J1DRh1 | Z31J1DRh2 | Z31J1DRh3 | Z31J1DRh4 | Z31J1DRh5 | Z31J1DRh6 | taxonomy                                                                                                              |
|---------|---------|---------|---------|----------|---------|----------|-----------|-----------|-----------|-----------|-----------|-----------|-----------------------------------------------------------------------------------------------------------------------|
| Otu987  | 6       | 4       | 4       | 4        | 4       | 13       | 6         | 10        | 5         | 6         | 9         | 3         | Bacteria; Planctomycetes; Planctomycetia; Gemmatales; Gemmataceae; Gemmata                                            |
| Otu986  | 1       | 10      | 0       | 0        | 0       | 0        | 0         | 0         | 0         | 0         | 0         | 0         | Bacteria; Proteobacteria; Deltaproteobacteria; Myxococcales                                                           |
| Otu981  | 0       | 0       | 1       | 13       | 0       | 4        | 1         | 0         | 0         | 0         | 2         | 1         | Bacteria; Planctomycetes; Phycisphaerae; WD2101                                                                       |
| Otu980  | 10      | 1       | 24      | 2        | 6       | 17       | 3         | 4         | 4         | 6         | 7         | 3         | Bacteria; Planctomycetes; Phycisphaerae; WD2101                                                                       |
| Otu983  | 64      | 10      | 4       | 10       | 1       | 23       | 3         | 7         | 5         | 1         | 3         | 0         | Bacteria; Proteobacteria; Gammaproteobacteria; Xanthomonadales; Xanthomonadaceae                                      |
| Otu982  | 1       | 6       | 2       | 1        | 0       | 2        | 0         | 0         | 0         | 2         | 9         | 0         | Bacteria; Verrucomicrobia; Pedosphaerae; Pedosphaerales; Ellin517                                                     |
| Otu2326 | 0       | 2       | 2       | 2        | 3       | 0        | 1         | 2         | 0         | 0         | 1         | 1         | Bacteria; Chloroflexi                                                                                                 |
| Otu2327 | 0       | 1       | 0       | 0        | 1       | 1        | 3         | 0         | 1         | 3         | 2         | 3         | Bacteria; Bacteroidetes; Sphingobacteria; Sphingobacteriales                                                          |
| Otu2324 | 0       | 1       | 0       | 0        | 0       | 1        | 1         | 0         | 3         | 0         | 0         | 1         | Bacteria; Chlamydiae; Chlamydia; Chlamydiales                                                                         |
| Otu339  | 6       | 9       | 2       | 5        | 5       | 7        | 13        | 56        | 11        | 5         | 15        | 4         | Bacteria; Gemmatimonadetes; Gemmatimonadetes; Ellin5290                                                               |
| Otu989  | 0       | 0       | 0       | 0        | 0       | 2        | 0         | 0         | 0         | 0         | 27        | 0         | Bacteria; Proteobacteria; Deltaproteobacteria; Desulfuromonadales; Geobacteraceae; Geobacter                          |
| Otu988  | 2       | 2       | 0       | 0        | 1       | 13       | 0         | 0         | 0         | 0         | 2         | 0         | Bacteria; Cyanobacteria                                                                                               |
| Otu2320 | 0       | 3       | 0       | 0        | 1       | 1        | 1         | 4         | 0         | 0         | 0         | 0         | Bacteria                                                                                                              |
| Otu2321 | 0       | 0       | 0       | 0        | 0       | 3        | 0         | 0         | 0         | 0         | 0         | 0         | Bacteria; Proteobacteria                                                                                              |
| Otu336  | 9       | 13      | 1       | 44       | 55      | 95       | 11        | 5         | 13        | 7         | 60        | 6         | Bacteria; Proteobacteria; Betaproteobacteria; Rhodocyclales; Rhodocyclaceae; Dechloromonas                            |
| Otu1755 | 0       | 0       | 0       | 5        | 1       | 0        | 0         | 0         | 0         | 0         | 1         | 4         | Bacteria; Planctomycetes; vadinHA49; DH61                                                                             |
| Otu337  | 2       | 0       | 31      | 73       | 3       | 7        | 2         | 5         | 5         | 0         | 0         | 5         | Bacteria; Proteobacteria; Gammaproteobacteria; Pseudomonadales; Moraxellaceae; Acinetobacter; Acinetobacter_johnsonii |
| Otu4379 | 0       | 0       | 0       | 0        | 1       | 3        | 1         | 1         | 0         | 0         | 1         | 0         | Bacteria; Proteobacteria; Gammaproteobacteria; Chromatiales                                                           |
| Otu1796 | 0       | 5       | 0       | 6        | 2       | 1        | 2         | 2         | 1         | 2         | 1         | 1         | Bacteria                                                                                                              |
| Otu1797 | 0       | 5       | 0       | 3        | 0       | 0        | 1         | 0         | 2         | 1         | 1         | 0         | Bacteria; Planctomycetes; Planctomycetia; Planctomycetales; Planctomycetaceae; Planctomyces                           |
| Otu1794 | 4       | 0       | 0       | 0        | 1       | 0        | 2         | 0         | 0         | 0         | 2         | 0         | Bacteria                                                                                                              |
| Otu1795 | 1       | 5       | 0       | 2        | 1       | 5        | 2         | 2         | 4         | 1         | 2         | 2         | Bacteria; Actinobacteria; Acidimicrobia; Acidimicrobiales; EB1017                                                     |

| #OTU ID | Z31DRh1 | Z31DRh2 | Z31DRh3 | Z31DRh4r | Z31DRh5 | Z31DRh6r | Z31J1DRh1 | Z31J1DRh2 | Z31J1DRh3 | Z31J1DRh4 | Z31J1DRh5 | Z31J1DRh6 | taxonomy                                                                                |
|---------|---------|---------|---------|----------|---------|----------|-----------|-----------|-----------|-----------|-----------|-----------|-----------------------------------------------------------------------------------------|
| Otu1792 | 12      | 0       | 0       | 0        | 0       | 2        | 0         | 0         | 0         | 0         | 0         | 0         | Bacteria; Cyanobacteria                                                                 |
| Otu1793 | 1       | 5       | 1       | 0        | 3       | 6        | 0         | 0         | 0         | 1         | 0         | 2         | Bacteria; Acidobacteria; Acidobacteria-5                                                |
| Otu1790 | 7       | 2       | 2       | 7        | 2       | 4        | 5         | 3         | 11        | 5         | 2         | 3         | Bacteria; Planctomycetes; Planctomycetia; Gemmatales; Gemmataceae; Gemmata              |
| Otu1791 | 16      | 10      | 1       | 7        | 8       | 6        | 8         | 10        | 10        | 5         | 9         | 4         | Bacteria; Proteobacteria; Deltaproteobacteria; Myxococcales; Polyangiaceae              |
| Otu3190 | 0       | 2       | 0       | 0        | 0       | 0        | 4         | 0         | 0         | 0         | 6         | 0         | Bacteria; OD1; SM2F11                                                                   |
| Otu1798 | 7       | 3       | 2       | 4        | 3       | 5        | 1         | 2         | 6         | 0         | 2         | 5         | Bacteria; Proteobacteria; Alphaproteobacteria; Sphingomonadales                         |
| Otu1799 | 2       | 4       | 4       | 6        | 1       | 3        | 5         | 4         | 4         | 10        | 5         | 1         | Bacteria; Chlamydiae; Chlamydia; Chlamydiales                                           |
| Otu2223 | 0       | 2       | 2       | 0        | 2       | 0        | 0         | 3         | 0         | 0         | 3         | 0         | Bacteria; Planctomycetes; Phycisphaerae; Phycisphaerales                                |
| Otu2222 | 0       | 0       | 0       | 0        | 3       | 0        | 0         | 0         | 0         | 0         | 0         | 0         | Bacteria; OD1; ZB2                                                                      |
| Otu2221 | 5       | 13      | 13      | 18       | 12      | 30       | 17        | 17        | 8         | 6         | 10        | 4         | Bacteria; Acidobacteria; Solibacteres; Solibacterales                                   |
| Otu2220 | 0       | 0       | 0       | 3        | 0       | 0        | 2         | 0         | 0         | 0         | 0         | 0         | Bacteria; Fusobacteria; Fusobacteriia; Fusobacteriales; Fusobacteriaceae; Fusobacterium |
| Otu2227 | 0       | 1       | 0       | 0        | 0       | 1        | 3         | 0         | 1         | 1         | 4         | 0         | Bacteria; Proteobacteria; TA18; PHOS-HD29                                               |
| Otu2226 | 2       | 1       | 1       | 2        | 0       | 0        | 1         | 3         | 1         | 0         | 1         | 0         | Bacteria; Proteobacteria; Gammaproteobacteria                                           |
| Otu2225 | 4       | 3       | 0       | 0        | 0       | 2        | 5         | 3         | 0         | 0         | 2         | 0         | Bacteria; Chloroflexi; Anaerolineae; GCA004                                             |
| Otu2224 | 1       | 0       | 2       | 0        | 0       | 5        | 0         | 2         | 0         | 4         | 2         | 1         | Bacteria; Bacteroidetes; Saprospirae; Saprospirales; Chitinophagaceae                   |
| Otu3196 | 0       | 0       | 0       | 0        | 0       | 0        | 0         | 0         | 0         | 0         | 7         | 0         | Bacteria; Chloroflexi; Chloroflexi; Roseiflexales                                       |
| Otu2229 | 7       | 7       | 9       | 15       | 2       | 12       | 15        | 11        | 9         | 10        | 10        | 1         | Bacteria; Proteobacteria; Alphaproteobacteria; Rhodospirillales; Rhodospirillaceae      |
| Otu2228 | 0       | 1       | 0       | 1        | 0       | 0        | 0         | 0         | 0         | 0         | 3         | 0         | Bacteria; Proteobacteria; Deltaproteobacteria; Myxococcales                             |
| Otu3197 | 0       | 0       | 2       | 2        | 2       | 2        | 0         | 0         | 0         | 0         | 1         | 0         | Bacteria; Planctomycetes; Phycisphaerae; CPLa-3                                         |
| Otu3732 | 6       | 0       | 2       | 2        | 0       | 4        | 0         | 0         | 0         | 0         | 0         | 0         | Bacteria; Planctomycetes; Phycisphaerae; WD2101                                         |
| Otu3868 | 0       | 0       | 0       | 0        | 4       | 0        | 0         | 0         | 0         | 0         | 0         | 0         | Bacteria; Bacteroidetes                                                                 |
| Otu3869 | 0       | 0       | 0       | 0        | 0       | 0        | 0         | 0         | 2         | 0         | 0         | 0         | Bacteria; Cyanobacteria; Chloroplast; Stramenopiles                                     |

| #OTU ID | Z31DRh1 | Z31DRh2 | Z31DRh3 | Z31DRh4r | Z31DRh5 | Z31DRh6r | Z31J1DRh1 | Z31J1DRh2 | Z31J1DRh3 | Z31J1DRh4 | Z31J1DRh5 | Z31J1DRh6 | taxonomy                                                                                              |
|---------|---------|---------|---------|----------|---------|----------|-----------|-----------|-----------|-----------|-----------|-----------|-------------------------------------------------------------------------------------------------------|
| Otu3318 | 0       | 1       | 1       | 2        | 0       | 0        | 0         | 0         | 1         | 0         | 3         | 1         | Bacteria; Acidobacteria; Acidobacteria-6; iii1-15                                                     |
| Otu3194 | 0       | 0       | 0       | 0        | 0       | 1        | 0         | 2         | 0         | 0         | 0         | 0         | Bacteria; Proteobacteria; Gammaproteobacteria; Legionellales; Coxiellaceae                            |
| Otu3733 | 2       | 0       | 0       | 1        | 1       | 0        | 1         | 0         | 2         | 0         | 0         | 0         | Bacteria; Cyanobacteria; Chloroplast; Chlorophyta; Chlamydomonadaceae; Oophila; Oophila_amblystomatis |
| Otu3314 | 0       | 0       | 0       | 1        | 0       | 0        | 0         | 0         | 0         | 0         | 2         | 1         | Bacteria; Proteobacteria; Deltaproteobacteria; Bdellovibrionales; Bdellovibrionaceae; Bdellovibrio    |
| Otu3315 | 1       | 0       | 0       | 0        | 0       | 2        | 0         | 2         | 0         | 3         | 0         | 2         | Bacteria; Proteobacteria; Deltaproteobacteria; Myxococcales                                           |
| Otu3316 | 0       | 0       | 2       | 1        | 1       | 1        | 0         | 0         | 0         | 1         | 0         | 1         | Bacteria; Planctomycetes; Planctomycetia; Gemmatales; Isosphaeraceae                                  |
| Otu3195 | 0       | 0       | 0       | 1        | 1       | 1        | 0         | 0         | 0         | 0         | 2         | 0         | Bacteria                                                                                              |
| Otu3310 | 0       | 0       | 0       | 0        | 0       | 0        | 2         | 0         | 0         | 0         | 1         | 0         | Bacteria; Chloroflexi; Anaerolineae; SHA-20                                                           |
| Otu3311 | 2       | 0       | 0       | 0        | 0       | 3        | 0         | 0         | 0         | 1         | 2         | 2         | Bacteria; Actinobacteria; Thermoleophilia; Solirubrobacterales                                        |
| Otu3312 | 1       | 1       | 0       | 0        | 0       | 0        | 3         | 1         | 2         | 0         | 1         | 0         | Bacteria; Actinobacteria; Thermoleophilia; Solirubrobacterales; Conexibacteraceae                     |
| Otu3313 | 0       | 0       | 0       | 2        | 0       | 1        | 2         | 0         | 0         | 1         | 0         | 0         | Bacteria; Proteobacteria; Deltaproteobacteria; MIZ46                                                  |
| Otu4107 | 0       | 2       | 0       | 0        | 0       | 0        | 0         | 0         | 0         | 0         | 0         | 0         | Bacteria; Proteobacteria                                                                              |
| Otu4100 | 0       | 0       | 0       | 0        | 0       | 0        | 0         | 0         | 0         | 0         | 2         | 0         | Bacteria; OD1                                                                                         |
| Otu4101 | 0       | 0       | 0       | 0        | 0       | 0        | 0         | 0         | 4         | 0         | 0         | 0         | Bacteria; Chlamydiae; Chlamydia; Chlamydiales                                                         |
| Otu3884 | 0       | 0       | 0       | 0        | 0       | 2        | 0         | 0         | 0         | 2         | 0         | 0         | Bacteria; Firmicutes; Clostridia; Clostridiales; Clostridiaceae; Oxobacter                            |
| Otu3885 | 0       | 2       | 0       | 0        | 0       | 0        | 0         | 1         | 2         | 0         | 0         | 0         | Bacteria; Actinobacteria; Acidimicrobia; Acidimicrobiales                                             |
| Otu3886 | 0       | 0       | 0       | 0        | 0       | 2        | 0         | 0         | 0         | 0         | 0         | 0         | Bacteria; Proteobacteria; Alphaproteobacteria                                                         |
| Otu3887 | 0       | 0       | 0       | 0        | 0       | 0        | 0         | 0         | 0         | 1         | 2         | 0         | Bacteria; Chloroflexi; Ktedonobacteria; B12-WMSP1                                                     |
| Otu3880 | 0       | 2       | 1       | 0        | 1       | 0        | 2         | 0         | 0         | 0         | 0         | 0         | Bacteria                                                                                              |
| Otu3881 | 0       | 0       | 0       | 0        | 0       | 1        | 0         | 0         | 0         | 0         | 4         | 0         | Bacteria; Chloroflexi; Chloroflexi; Roseiflexales                                                     |
| Otu3882 | 0       | 0       | 0       | 0        | 0       | 2        | 0         | 0         | 0         | 0         | 0         | 0         | Bacteria; Verrucomicrobia; Spartobacteria; Chthoniobacterales; Chthoniobacteraceae                    |
| Otu3883 | 0       | 0       | 1       | 0        | 0       | 0        | 0         | 1         | 2         | 3         | 1         | 0         | Bacteria; Proteobacteria; Alphaproteobacteria; Rickettsiales                                          |

| #OTU ID | Z31DRh1 | Z31DRh2 | Z31DRh3 | Z31DRh4r | Z31DRh5 | Z31DRh6r | Z31J1DRh1 | Z31J1DRh2 | Z31J1DRh3 | Z31J1DRh4 | Z31J1DRh5 | Z31J1DRh6 | taxonomy                                                                                           |
|---------|---------|---------|---------|----------|---------|----------|-----------|-----------|-----------|-----------|-----------|-----------|----------------------------------------------------------------------------------------------------|
| Otu3179 | 0       | 1       | 0       | 0        | 0       | 0        | 1         | 0         | 0         | 2         | 2         | 0         | Bacteria; TM7; SC3                                                                                 |
| Otu3888 | 0       | 2       | 1       | 1        | 0       | 4        | 0         | 0         | 0         | 0         | 0         | 0         | Bacteria; Proteobacteria; TA18; PHOS-HD29                                                          |
| Otu3360 | 0       | 0       | 0       | 0        | 0       | 0        | 0         | 2         | 0         | 0         | 0         | 0         | Bacteria; Planctomycetes; Planctomycetia; Gemmatales                                               |
| Otu2927 | 2       | 0       | 0       | 0        | 0       | 0        | 0         | 0         | 0         | 0         | 0         | 0         | Bacteria; Firmicutes; Clostridia; Clostridiales; Ruminococcaceae                                   |
| Otu3217 | 0       | 0       | 0       | 0        | 0       | 0        | 2         | 2         | 0         | 0         | 0         | 0         | Bacteria; Acidobacteria; Acidobacteriia; Acidobacteriales; Koribacteraceae                         |
| Otu4009 | 0       | 0       | 0       | 1        | 0       | 0        | 2         | 1         | 0         | 0         | 0         | 2         | Bacteria; Firmicutes; Bacilli; Bacillales; Bacillaceae; Terribacillus                              |
| Otu4255 | 0       | 0       | 0       | 0        | 0       | 0        | 0         | 0         | 0         | 0         | 3         | 0         | Bacteria                                                                                           |
| Otu3216 | 3       | 0       | 1       | 2        | 0       | 9        | 2         | 0         | 4         | 3         | 1         | 3         | Bacteria; Proteobacteria; Deltaproteobacteria; Myxococcales; Polyangiaceae                         |
| Otu3738 | 0       | 0       | 0       | 0        | 0       | 0        | 0         | 0         | 0         | 2         | 0         | 0         | Bacteria; TM6; SBRH58                                                                              |
| Otu4008 | 0       | 3       | 0       | 0        | 0       | 1        | 0         | 0         | 0         | 0         | 2         | 0         | Bacteria; Armatimonadetes; Chthonomonadetes; SJA-22                                                |
| Otu1644 | 6       | 1       | 3       | 4        | 2       | 13       | 5         | 3         | 7         | 7         | 3         | 0         | Bacteria; Bacteroidetes; Saprospirae; Saprospirales; Chitinophagaceae                              |
| Otu1645 | 3       | 6       | 1       | 3        | 2       | 2        | 3         | 0         | 4         | 1         | 5         | 0         | Bacteria; Chloroflexi; Anaerolineae; A31                                                           |
| Otu1646 | 5       | 4       | 1       | 6        | 0       | 3        | 1         | 2         | 2         | 2         | 2         | 1         | Bacteria; Planctomycetes; Planctomycetia; Gemmatales; Gemmataceae; Gemmata                         |
| Otu1647 | 5       | 0       | 2       | 5        | 2       | 8        | 1         | 5         | 2         | 3         | 0         | 4         | Bacteria; Proteobacteria; Deltaproteobacteria; Bdellovibrionales; Bdellovibrionaceae; Bdellovibrio |
| Otu1640 | 0       | 2       | 1       | 0        | 2       | 0        | 6         | 0         | 1         | 0         | 1         | 1         | Bacteria; Proteobacteria; Deltaproteobacteria; Bdellovibrionales; Bdellovibrionaceae; Bdellovibrio |
| Otu1641 | 2       | 0       | 1       | 5        | 4       | 2        | 2         | 0         | 2         | 1         | 0         | 5         | Bacteria                                                                                           |
| Otu1642 | 3       | 6       | 11      | 9        | 8       | 7        | 7         | 4         | 2         | 3         | 14        | 3         | Bacteria; Proteobacteria; Alphaproteobacteria; Rhodospirillales; Rhodospirillaceae                 |
| Otu1643 | 0       | 6       | 0       | 1        | 1       | 0        | 0         | 0         | 0         | 3         | 0         | 0         | Bacteria; Proteobacteria                                                                           |
| Otu2137 | 11      | 8       | 6       | 6        | 1       | 1        | 5         | 3         | 0         | 3         | 3         | 0         | Bacteria; Acidobacteria; Chloracidobacteria; DS-100                                                |
| Otu2136 | 0       | 0       | 0       | 0        | 0       | 0        | 0         | 0         | 0         | 3         | 0         | 0         | Bacteria                                                                                           |
| Otu2135 | 1       | 1       | 0       | 0        | 0       | 0        | 0         | 0         | 0         | 0         | 5         | 0         | Bacteria                                                                                           |
| Otu2134 | 0       | 0       | 2       | 1        | 0       | 0        | 6         | 0         | 0         | 0         | 0         | 0         | Bacteria; Proteobacteria; Alphaproteobacteria                                                      |

| #OTU ID | Z31DRh1 | Z31DRh2 | Z31DRh3 | Z31DRh4r | Z31DRh5 | Z31DRh6r | Z31J1DRh1 | Z31J1DRh2 | Z31J1DRh3 | Z31J1DRh4 | Z31J1DRh5 | Z31J1DRh6 | taxonomy                                                                                            |
|---------|---------|---------|---------|----------|---------|----------|-----------|-----------|-----------|-----------|-----------|-----------|-----------------------------------------------------------------------------------------------------|
| Otu1648 | 2       | 3       | 1       | 1        | 4       | 0        | 0         | 4         | 1         | 0         | 0         | 1         | Bacteria; Proteobacteria; Gammaproteobacteria                                                       |
| Otu1649 | 0       | 3       | 0       | 0        | 1       | 0        | 0         | 0         | 0         | 0         | 5         | 0         | Bacteria; TM7; SC3                                                                                  |
| Otu2131 | 5       | 2       | 5       | 11       | 6       | 15       | 8         | 7         | 12        | 9         | 5         | 9         | Bacteria; Proteobacteria; Deltaproteobacteria; Myxococcales                                         |
| Otu2130 | 0       | 4       | 1       | 1        | 0       | 0        | 0         | 0         | 0         | 0         | 1         | 0         | Bacteria; Chloroflexi; Anaerolineae; SBR1031; A4b                                                   |
| Otu4006 | 0       | 1       | 0       | 3        | 0       | 1        | 0         | 1         | 0         | 2         | 0         | 2         | Bacteria; Tenericutes; Mollicutes; Anaeroplasmatales; Anaeroplasmataceae; Asteroleplasma            |
| Otu4001 | 0       | 2       | 0       | 4        | 0       | 1        | 1         | 2         | 1         | 1         | 0         | 1         | Bacteria; Bacteroidetes; Sphingobacteriia; Sphingobacteriales                                       |
| Otu4000 | 0       | 0       | 0       | 0        | 0       | 0        | 0         | 0         | 0         | 0         | 2         | 0         | Bacteria                                                                                            |
| Otu58   | 395     | 177     | 226     | 559      | 214     | 734      | 271       | 183       | 179       | 285       | 143       | 121       | Bacteria; Bacteroidetes; Saprospirae; Saprospirales; Chitinophagaceae; Niastella                    |
| Otu59   | 110     | 98      | 37      | 136      | 96      | 111      | 135       | 99        | 125       | 425       | 77        | 125       | Bacteria; Proteobacteria; Betaproteobacteria                                                        |
| Otu4297 | 0       | 0       | 0       | 0        | 0       | 0        | 0         | 0         | 0         | 0         | 2         | 0         | Bacteria; Bacteroidetes; Cytophagia; Cytophagales; Amoebofilaceae                                   |
| Otu50   | 283     | 391     | 374     | 426      | 318     | 490      | 399       | 355       | 376       | 257       | 463       | 168       | Bacteria; Proteobacteria; Betaproteobacteria                                                        |
| Otu52   | 104     | 85      | 105     | 204      | 212     | 425      | 197       | 346       | 265       | 383       | 288       | 87        | Bacteria; Acidobacteria; Acidobacteriia; Acidobacteriales; Koribacteraceae                          |
| Otu53   | 9       | 32      | 93      | 411      | 56      | 143      | 31        | 18        | 76        | 10        | 14        | 107       | Bacteria; Bacteroidetes; Saprospirae; Saprospirales; Chitinophagaceae                               |
| Otu54   | 328     | 165     | 234     | 461      | 195     | 329      | 247       | 154       | 197       | 141       | 211       | 204       | Bacteria; Proteobacteria; Alphaproteobacteria; Caulobacterales; Caulobacteraceae; Phenyllobacterium |
| Otu55   | 36      | 379     | 98      | 166      | 24      | 47       | 373       | 29        | 12        | 70        | 98        | 42        | Bacteria; Actinobacteria; Actinobacteria; Actinomycetales; Nocardioidaceae; Aeromicrobium           |
| Otu56   | 20      | 17      | 31      | 33       | 16      | 494      | 16        | 11        | 10        | 17        | 34        | 10        | Bacteria; Proteobacteria; Gammaproteobacteria; Xanthomonadales; Xanthomonadaceae                    |
| Otu57   | 210     | 267     | 313     | 350      | 162     | 120      | 198       | 250       | 227       | 263       | 244       | 87        | Bacteria; Verrucomicrobia; Spartobacteria; Chthoniobacteriales; Chthoniobacteraceae; DA101          |
| Otu3902 | 0       | 0       | 0       | 2        | 0       | 0        | 0         | 0         | 0         | 0         | 0         | 0         | Bacteria                                                                                            |
| Otu3174 | 0       | 0       | 2       | 0        | 0       | 0        | 0         | 0         | 1         | 0         | 0         | 0         | Bacteria; Proteobacteria; Alphaproteobacteria; Caulobacterales; Caulobacteraceae; Phenyllobacterium |
| Otu2116 | 2       | 2       | 0       | 2        | 0       | 3        | 2         | 6         | 1         | 0         | 0         | 1         | Bacteria; Bacteroidetes; Cytophagia; Cytophagales; Cytophagaceae                                    |
| Otu240  | 36      | 50      | 43      | 68       | 15      | 105      | 64        | 82        | 80        | 51        | 69        | 55        | Bacteria; Actinobacteria; Thermoleophilia; Gaiellales; Gaiellaceae                                  |
| Otu2911 | 0       | 0       | 0       | 0        | 0       | 0        | 0         | 0         | 2         | 0         | 0         | 0         | Bacteria; Chlamydiae; Chlamydia; Chlamydiales                                                       |

| #OTU ID | Z31DRh1 | Z31DRh2 | Z31DRh3 | Z31DRh4r | Z31DRh5 | Z31DRh6r | Z31J1DRh1 | Z31J1DRh2 | Z31J1DRh3 | Z31J1DRh4 | Z31J1DRh5 | Z31J1DRh6 | taxonomy                                                                                                     |
|---------|---------|---------|---------|----------|---------|----------|-----------|-----------|-----------|-----------|-----------|-----------|--------------------------------------------------------------------------------------------------------------|
| Otu2910 | 0       | 0       | 2       | 2        | 0       | 0        | 0         | 0         | 0         | 0         | 0         | 0         | Bacteria; Proteobacteria; Deltaproteobacteria; MIZ46                                                         |
| Otu2913 | 0       | 0       | 0       | 0        | 0       | 1        | 1         | 0         | 0         | 0         | 4         | 0         | Bacteria; Proteobacteria; Alphaproteobacteria; Rhodobacterales; Hyphomonadaceae                              |
| Otu2912 | 0       | 2       | 0       | 3        | 0       | 0        | 2         | 0         | 0         | 1         | 1         | 0         | Bacteria; Proteobacteria; Deltaproteobacteria; Myxococcales; OM27                                            |
| Otu2915 | 0       | 3       | 0       | 0        | 3       | 0        | 0         | 0         | 0         | 0         | 0         | 0         | Bacteria; Proteobacteria; Gammaproteobacteria; Legionellales                                                 |
| Otu2914 | 0       | 0       | 0       | 0        | 2       | 0        | 0         | 0         | 0         | 1         | 1         | 0         | Bacteria; Acidobacteria; Solibacteres; Solibacterales; Solibacteraceae; Candidatus_Solibacter                |
| Otu2917 | 0       | 1       | 0       | 0        | 0       | 0        | 0         | 0         | 1         | 1         | 2         | 0         | Bacteria; Proteobacteria; Alphaproteobacteria; Rickettsiales; mitochondria                                   |
| Otu2916 | 0       | 0       | 0       | 2        | 0       | 0        | 0         | 0         | 0         | 0         | 0         | 0         | Bacteria; Proteobacteria; Deltaproteobacteria; Myxococcales                                                  |
| Otu2919 | 0       | 0       | 0       | 1        | 0       | 0        | 0         | 0         | 2         | 0         | 0         | 1         | Bacteria                                                                                                     |
| Otu2918 | 1       | 1       | 0       | 3        | 0       | 0        | 2         | 3         | 2         | 0         | 0         | 0         | Bacteria; Bacteroidetes; Cytophagia; Cytophagales; Cytophagaceae                                             |
| Otu4010 | 1       | 0       | 0       | 0        | 1       | 1        | 1         | 0         | 0         | 2         | 2         | 1         | Bacteria; Planctomycetes; Phycisphaerae; WD2101                                                              |
| Otu4011 | 0       | 0       | 0       | 0        | 0       | 0        | 0         | 0         | 0         | 0         | 2         | 0         | Bacteria                                                                                                     |
| Otu4016 | 0       | 0       | 1       | 0        | 0       | 3        | 0         | 0         | 1         | 0         | 0         | 0         | Bacteria; Actinobacteria; Actinobacteria; Actinomycetales; Kineosporiaceae; Kineosporia                      |
| Otu4017 | 0       | 2       | 0       | 3        | 2       | 2        | 0         | 1         | 0         | 1         | 4         | 0         | Bacteria; Verrucomicrobia; Pedosphaerae; Pedosphaerales                                                      |
| Otu4014 | 0       | 2       | 0       | 0        | 0       | 0        | 1         | 0         | 0         | 0         | 0         | 0         | Bacteria                                                                                                     |
| Otu4015 | 0       | 0       | 1       | 1        | 2       | 0        | 0         | 0         | 0         | 0         | 0         | 0         | Bacteria; WPS-2                                                                                              |
| Otu1253 | 1       | 0       | 1       | 6        | 0       | 0        | 0         | 1         | 0         | 0         | 0         | 1         | Bacteria; Proteobacteria; Deltaproteobacteria; Myxococcales; Polyangiaceae                                   |
| Otu1252 | 1       | 10      | 5       | 3        | 0       | 1        | 1         | 1         | 1         | 1         | 1         | 0         | Bacteria; Gemmatimonadetes; Gemm-3                                                                           |
| Otu1251 | 3       | 2       | 1       | 1        | 3       | 9        | 2         | 9         | 3         | 3         | 2         | 2         | Bacteria; Actinobacteria; Thermoleophilia; Solirubrobacterales                                               |
| Otu1250 | 6       | 0       | 0       | 1        | 0       | 0        | 3         | 3         | 3         | 0         | 0         | 11        | Bacteria; Proteobacteria; Gammaproteobacteria; Xanthomonadales; Xanthomonadaceae                             |
| Otu1257 | 1       | 8       | 3       | 0        | 1       | 0        | 7         | 5         | 1         | 8         | 6         | 3         | Bacteria; Proteobacteria; Gammaproteobacteria; Alteromonadales; Shewanellaceae; Shewanella; Shewanella_algae |
| Otu1256 | 7       | 7       | 2       | 2        | 13      | 11       | 7         | 7         | 12        | 3         | 1         | 6         | Bacteria; Proteobacteria; Gammaproteobacteria; Alteromonadales; Alteromonadaceae; Cellvibrio                 |
| Otu1255 | 1       | 3       | 0       | 2        | 4       | 7        | 0         | 0         | 0         | 4         | 5         | 1         | Bacteria; Bacteroidetes; Sphingobacteria; Sphingobacteriales                                                 |

| #OTU ID | Z31DRh1 | Z31DRh2 | Z31DRh3 | Z31DRh4r | Z31DRh5 | Z31DRh6r | Z31J1DRh1 | Z31J1DRh2 | Z31J1DRh3 | Z31J1DRh4 | Z31J1DRh5 | Z31J1DRh6 | taxonomy                                                                            |
|---------|---------|---------|---------|----------|---------|----------|-----------|-----------|-----------|-----------|-----------|-----------|-------------------------------------------------------------------------------------|
| Otu1254 | 1       | 2       | 5       | 8        | 4       | 7        | 8         | 4         | 9         | 1         | 2         | 2         | Bacteria; Planctomycetes; Planctomycetia; Pirellulales; Pirellulaceae; A17          |
| Otu3146 | 2       | 0       | 0       | 0        | 0       | 0        | 0         | 0         | 0         | 0         | 0         | 0         | Bacteria                                                                            |
| Otu1259 | 10      | 6       | 0       | 0        | 0       | 0        | 3         | 3         | 0         | 0         | 0         | 1         | Bacteria; Proteobacteria; Gammaproteobacteria; Aeromonadales; Aeromonadaceae        |
| Otu1258 | 0       | 3       | 0       | 1        | 13      | 2        | 0         | 0         | 0         | 0         | 0         | 0         | Bacteria; Verrucomicrobia; Spartobacteria; Chthoniobacteriales; Chthoniobacteraceae |
| Otu1495 | 7       | 4       | 11      | 7        | 4       | 11       | 0         | 3         | 4         | 2         | 1         | 2         | Bacteria                                                                            |
| Otu1494 | 0       | 3       | 0       | 2        | 7       | 2        | 4         | 1         | 0         | 0         | 3         | 0         | Bacteria; Planctomycetes; Planctomycetia; Pirellulales; Pirellulaceae; A17          |
| Otu1497 | 1       | 0       | 2       | 6        | 0       | 2        | 0         | 2         | 2         | 2         | 5         | 0         | Bacteria; Planctomycetes; Phycisphaerae; WD2101                                     |
| Otu1496 | 3       | 0       | 4       | 2        | 1       | 8        | 0         | 0         | 1         | 0         | 1         | 0         | Bacteria; Cyanobacteria; ML635J-21                                                  |
| Otu1491 | 0       | 0       | 0       | 0        | 0       | 0        | 0         | 5         | 0         | 0         | 0         | 0         | Bacteria; Proteobacteria; Gammaproteobacteria; Legionellales; Coxiellaceae          |
| Otu1490 | 0       | 5       | 1       | 0        | 0       | 2        | 0         | 0         | 1         | 0         | 3         | 0         | Bacteria; Armatimonadetes; Chthonomonadetes; Chthonomonadales                       |
| Otu1493 | 0       | 0       | 0       | 0        | 1       | 2        | 2         | 5         | 4         | 2         | 3         | 0         | Bacteria; Proteobacteria; Gammaproteobacteria; Legionellales; Coxiellaceae          |
| Otu1492 | 3       | 0       | 3       | 9        | 2       | 11       | 0         | 1         | 6         | 2         | 2         | 3         | Bacteria; Armatimonadetes; Chthonomonadetes; Chthonomonadales; Chthonomonadaceae    |
| Otu1499 | 1       | 0       | 0       | 0        | 0       | 7        | 0         | 0         | 0         | 0         | 0         | 0         | Bacteria; Planctomycetes; Phycisphaerae; CPla-3                                     |
| Otu349  | 5       | 31      | 8       | 11       | 22      | 20       | 40        | 52        | 22        | 15        | 35        | 3         | Bacteria; Verrucomicrobia; Pedosphaerae; Pedosphaerales                             |
| Otu4256 | 0       | 2       | 0       | 1        | 1       | 0        | 0         | 0         | 0         | 0         | 0         | 0         | Bacteria; Proteobacteria; Deltaproteobacteria; Myxococcales; Haliangiaceae          |
| Otu348  | 61      | 24      | 26      | 84       | 45      | 82       | 41        | 72        | 31        | 33        | 31        | 7         | Bacteria; Bacteroidetes; Cytophagia; Cytophagales; Cytophagaceae                    |
| Otu439  | 27      | 26      | 39      | 42       | 23      | 58       | 23        | 26        | 49        | 28        | 21        | 23        | Bacteria; Proteobacteria; Betaproteobacteria; A21b; UD5                             |
| Otu438  | 19      | 39      | 16      | 12       | 17      | 21       | 21        | 34        | 9         | 20        | 37        | 6         | Bacteria; Acidobacteria; Chloracidobacteria; DS-100                                 |
| Otu3466 | 0       | 0       | 0       | 1        | 2       | 0        | 0         | 0         | 0         | 0         | 0         | 0         | Bacteria; TM7; TM7-1                                                                |
| Otu3467 | 0       | 0       | 0       | 2        | 0       | 0        | 0         | 0         | 0         | 0         | 0         | 0         | Bacteria; Elusimicrobia; Elusimicrobia; FAC88                                       |
| Otu3464 | 0       | 1       | 2       | 0        | 1       | 0        | 0         | 0         | 0         | 0         | 2         | 0         | Bacteria; OD1                                                                       |
| Otu3465 | 23      | 129     | 27      | 40       | 34      | 28       | 37        | 23        | 7         | 24        | 46        | 15        | Bacteria; Acidobacteria; Acidobacteria-6; iii1-15                                   |

| #OTU ID | Z31DRh1 | Z31DRh2 | Z31DRh3 | Z31DRh4r | Z31DRh5 | Z31DRh6r | Z31J1DRh1 | Z31J1DRh2 | Z31J1DRh3 | Z31J1DRh4 | Z31J1DRh5 | Z31J1DRh6 | taxonomy                                                                                        |
|---------|---------|---------|---------|----------|---------|----------|-----------|-----------|-----------|-----------|-----------|-----------|-------------------------------------------------------------------------------------------------|
| Otu3462 | 0       | 0       | 0       | 0        | 0       | 0        | 2         | 0         | 0         | 0         | 0         | 0         | Bacteria; Bacteroidetes                                                                         |
| Otu3463 | 2       | 1       | 1       | 0        | 1       | 2        | 0         | 0         | 0         | 0         | 0         | 0         | Bacteria; Planctomycetes; Planctomycetia; Pirellulales; Pirellulaceae; Pirellula                |
| Otu3460 | 0       | 0       | 0       | 1        | 0       | 3        | 1         | 0         | 1         | 0         | 0         | 2         | Bacteria                                                                                        |
| Otu3461 | 3       | 1       | 0       | 0        | 0       | 2        | 1         | 0         | 1         | 1         | 3         | 0         | Bacteria; Proteobacteria; Gammaproteobacteria; Legionellales; Coxiellaceae; Aquicella           |
| Otu3468 | 11      | 4       | 10      | 13       | 2       | 40       | 8         | 15        | 18        | 13        | 8         | 1         | Bacteria; Chloroflexi; Anaerolineae; SBR1031; oc28                                              |
| Otu3469 | 1       | 12      | 3       | 51       | 56      | 0        | 0         | 1         | 0         | 6         | 4         | 7         | Bacteria; Bacteroidetes; Saprospirae; Saprospirales; Chitinophagaceae                           |
| Otu343  | 41      | 76      | 23      | 57       | 23      | 41       | 40        | 16        | 4         | 25        | 39        | 9         | Bacteria; Proteobacteria; Gammaproteobacteria; Xanthomonadales; Sinobacteraceae                 |
| Otu342  | 6       | 145     | 8       | 16       | 15      | 4        | 12        | 2         | 1         | 8         | 13        | 2         | Bacteria; Acidobacteria; Chloracidobacteria; RB41                                               |
| Otu341  | 20      | 45      | 18      | 85       | 31      | 116      | 40        | 68        | 25        | 53        | 57        | 30        | Bacteria; Nitrospirae; Nitrospira; Nitrospirales; Nitrospiraceae                                |
| Otu340  | 22      | 58      | 16      | 35       | 27      | 22       | 56        | 8         | 5         | 17        | 17        | 12        | Bacteria; Proteobacteria; Gammaproteobacteria; Xanthomonadales; Sinobacteraceae; Steroidobacter |
| Otu3147 | 0       | 0       | 0       | 0        | 0       | 0        | 0         | 0         | 0         | 0         | 3         | 0         | Bacteria                                                                                        |
| Otu347  | 39      | 35      | 45      | 71       | 25      | 59       | 69        | 111       | 78        | 63        | 103       | 44        | Bacteria; Actinobacteria; Thermoleophilina; Gaiellales; Gaiellaceae                             |
| Otu346  | 21      | 47      | 36      | 33       | 35      | 82       | 26        | 21        | 22        | 34        | 43        | 13        | Bacteria; Planctomycetes; Phycisphaerae; WD2101                                                 |
| Otu345  | 16      | 31      | 12      | 48       | 13      | 44       | 45        | 29        | 33        | 28        | 23        | 15        | Bacteria; Bacteroidetes; Sphingobacteria; Sphingobacteriales                                    |
| Otu3909 | 0       | 0       | 0       | 0        | 0       | 0        | 0         | 0         | 0         | 2         | 0         | 0         | Bacteria; Planctomycetes; Planctomycetia; Pirellulales; Pirellulaceae                           |
| Otu344  | 38      | 3       | 7       | 55       | 13      | 76       | 7         | 27        | 5         | 5         | 4         | 31        | Bacteria; Bacteroidetes; Saprospirae; Saprospirales; Chitinophagaceae; Niabella                 |
| Otu3790 | 0       | 0       | 0       | 0        | 0       | 2        | 1         | 1         | 0         | 0         | 0         | 0         | Bacteria; Planctomycetes; Planctomycetia; Gemmatales; Gemmataceae                               |
| Otu3791 | 0       | 0       | 0       | 2        | 0       | 0        | 0         | 0         | 0         | 0         | 0         | 0         | Bacteria; Armatimonadetes; Armatimonadia; Armatimonadales; Armatimonadaceae                     |
| Otu3792 | 0       | 0       | 2       | 0        | 0       | 0        | 0         | 0         | 1         | 1         | 0         | 0         | Bacteria; Proteobacteria; Alphaproteobacteria; Rhodospirillales; Rhodospirillaceae              |
| Otu3793 | 1       | 0       | 0       | 0        | 0       | 0        | 0         | 0         | 0         | 0         | 2         | 0         | Bacteria; Proteobacteria; Deltaproteobacteria; MIZ46                                            |
| Otu3794 | 2       | 0       | 0       | 1        | 0       | 0        | 0         | 0         | 0         | 0         | 0         | 0         | Bacteria; Firmicutes; Clostridia; Clostridiales; Syntrophomonadaceae; Syntrophomonas            |
| Otu3795 | 17      | 6       | 13      | 18       | 23      | 46       | 33        | 62        | 53        | 40        | 35        | 19        | Bacteria; Acidobacteria; Acidobacteriia; Acidobacteriales; Koribacteraceae                      |



| #OTU ID | Z31DRh1 | Z31DRh2 | Z31DRh3 | Z31DRh4r | Z31DRh5 | Z31DRh6r | Z31J1DRh1 | Z31J1DRh2 | Z31J1DRh3 | Z31J1DRh4 | Z31J1DRh5 | Z31J1DRh6 | taxonomy                                                                                      |
|---------|---------|---------|---------|----------|---------|----------|-----------|-----------|-----------|-----------|-----------|-----------|-----------------------------------------------------------------------------------------------|
| Otu3796 | 0       | 0       | 0       | 0        | 2       | 0        | 0         | 0         | 0         | 0         | 0         | 0         | Bacteria; Proteobacteria; Betaproteobacteria; Burkholderiales; Comamonadaceae                 |
| Otu3797 | 0       | 0       | 0       | 0        | 0       | 1        | 3         | 4         | 1         | 0         | 0         | 0         | Bacteria; Proteobacteria; Gammaproteobacteria; Legionellales                                  |
| Otu3798 | 0       | 0       | 1       | 4        | 2       | 1        | 0         | 2         | 0         | 2         | 2         | 0         | Bacteria; Elusimicrobia; Elusimicrobia; I1b                                                   |
| Otu3799 | 0       | 0       | 0       | 0        | 1       | 0        | 1         | 0         | 2         | 1         | 0         | 2         | Bacteria; Proteobacteria; Betaproteobacteria; Burkholderiales; Oxalobacteraceae               |
| Otu4168 | 1       | 1       | 0       | 4        | 0       | 2        | 2         | 0         | 0         | 0         | 0         | 0         | Bacteria; Verrucomicrobia; Verrucomicrobiae; Verrucomicrobiales; Verrucomicrobiaceae          |
| Otu4169 | 0       | 0       | 0       | 0        | 0       | 4        | 0         | 0         | 0         | 2         | 0         | 0         | Bacteria; Planctomycetes; Planctomycetia; Gemmatales; Gemmataceae                             |
| Otu512  | 4       | 9       | 2       | 3        | 7       | 43       | 12        | 10        | 7         | 8         | 6         | 4         | Bacteria; Planctomycetes; Phycisphaerae; WD2101                                               |
| Otu513  | 17      | 23      | 24      | 51       | 13      | 41       | 50        | 55        | 49        | 60        | 30        | 26        | Bacteria; Acidobacteria; Solibacteres; Solibacterales; Solibacteraceae                        |
| Otu510  | 12      | 7       | 11      | 16       | 10      | 29       | 26        | 3         | 4         | 2         | 11        | 5         | Bacteria; Actinobacteria; Actinobacteria; Actinomycetales; Pseudonocardiales; Amycolatopsis   |
| Otu511  | 18      | 29      | 5       | 38       | 23      | 7        | 19        | 1         | 1         | 3         | 15        | 4         | Bacteria; Acidobacteria; iii1-8; 32-20                                                        |
| Otu516  | 19      | 25      | 12      | 6        | 34      | 25       | 8         | 1         | 0         | 8         | 35        | 1         | Bacteria; WS3; PRR-12; Sediment-1                                                             |
| Otu517  | 1       | 0       | 0       | 1        | 0       | 2        | 0         | 0         | 27        | 0         | 0         | 0         | Bacteria; Bacteroidetes; Saprospirae; Saprospirales; Chitinophagaceae                         |
| Otu514  | 6       | 11      | 12      | 32       | 0       | 1        | 13        | 16        | 12        | 6         | 17        | 1         | Bacteria; Chlamydiae; Chlamydia; Chlamydiales; Rhabdochlamydiae; Candidatus_Rhabdochlamydia   |
| Otu515  | 5       | 8       | 8       | 16       | 13      | 30       | 24        | 15        | 13        | 20        | 34        | 6         | Bacteria; Gemmatimonadetes; Gemmatimonadetes; KD8-87                                          |
| Otu518  | 6       | 0       | 0       | 24       | 1       | 0        | 0         | 1         | 0         | 0         | 0         | 0         | Bacteria                                                                                      |
| Otu519  | 19      | 34      | 21      | 28       | 22      | 33       | 10        | 1         | 5         | 3         | 8         | 6         | Bacteria; Proteobacteria; Deltaproteobacteria; Myxococcales                                   |
| Otu1079 | 16      | 17      | 14      | 15       | 11      | 22       | 10        | 7         | 12        | 8         | 15        | 6         | Bacteria; Proteobacteria; Betaproteobacteria                                                  |
| Otu1078 | 1       | 11      | 0       | 1        | 0       | 0        | 0         | 0         | 2         | 0         | 1         | 1         | Bacteria; Proteobacteria; Gammaproteobacteria; Pseudomonadales; Moraxellaceae; Perleucidibaca |
| Otu1073 | 1       | 1       | 3       | 5        | 3       | 12       | 6         | 1         | 6         | 3         | 10        | 5         | Bacteria; Verrucomicrobia; Spartobacteria; Chthoniobacteriales; Chthoniobacteraceae           |
| Otu1072 | 2       | 3       | 2       | 5        | 1       | 8        | 2         | 4         | 4         | 6         | 9         | 10        | Bacteria; Planctomycetes; Planctomycetia; Gemmatales; Gemmataceae                             |
| Otu1071 | 0       | 0       | 0       | 0        | 1       | 3        | 3         | 10        | 1         | 0         | 2         | 2         | Bacteria; Gemmatimonadetes; Gemmatimonadetes                                                  |
| Otu1070 | 1       | 5       | 0       | 1        | 2       | 4        | 6         | 11        | 2         | 3         | 17        | 2         | Bacteria; FCPU426                                                                             |

| #OTU ID | Z31DRh1 | Z31DRh2 | Z31DRh3 | Z31DRh4r | Z31DRh5 | Z31DRh6r | Z31J1DRh1 | Z31J1DRh2 | Z31J1DRh3 | Z31J1DRh4 | Z31J1DRh5 | Z31J1DRh6 | taxonomy                                                                                          |
|---------|---------|---------|---------|----------|---------|----------|-----------|-----------|-----------|-----------|-----------|-----------|---------------------------------------------------------------------------------------------------|
| Otu1077 | 0       | 0       | 0       | 0        | 0       | 0        | 0         | 0         | 0         | 11        | 0         | 0         | Bacteria; Planctomycetes; Phycisphaerae; Phycisphaerales                                          |
| Otu1076 | 5       | 4       | 2       | 5        | 9       | 11       | 4         | 4         | 1         | 5         | 2         | 4         | Bacteria; Proteobacteria; Gammaproteobacteria                                                     |
| Otu1075 | 2       | 14      | 1       | 5        | 3       | 10       | 8         | 6         | 1         | 10        | 3         | 3         | Bacteria; Firmicutes; Bacilli; Bacillales; Bacillaceae; Bacillus; Bacillus_selenatarsenatis       |
| Otu1074 | 4       | 0       | 2       | 10       | 1       | 18       | 2         | 12        | 12        | 4         | 2         | 3         | Bacteria; Actinobacteria; Actinobacteria; Actinomycetales                                         |
| Otu228  | 8       | 3       | 6       | 61       | 37      | 106      | 1         | 1         | 32        | 3         | 4         | 0         | Bacteria; Cyanobacteria; Oscillatoriothyraceae; Oscillatoriales; Phormidiaceae; Phormidium        |
| Otu229  | 91      | 59      | 3       | 41       | 4       | 10       | 27        | 33        | 52        | 2         | 19        | 0         | Bacteria; Bacteroidetes; Saprospirae; Saprospirales; Chitinophagaceae                             |
| Otu738  | 0       | 8       | 2       | 1        | 27      | 11       | 1         | 2         | 2         | 0         | 13        | 0         | Bacteria; Bacteroidetes; Saprospirae; Saprospirales; Chitinophagaceae                             |
| Otu739  | 11      | 12      | 4       | 10       | 5       | 16       | 4         | 13        | 5         | 10        | 21        | 4         | Bacteria; Actinobacteria; Actinobacteria; Actinomycetales; Micromonosporaceae                     |
| Otu4257 | 1       | 0       | 0       | 0        | 0       | 3        | 0         | 2         | 0         | 0         | 0         | 0         | Bacteria; Proteobacteria; Alphaproteobacteria; Rhizobiales; Rhizobiaceae; Kaistia                 |
| Otu220  | 36      | 21      | 31      | 46       | 20      | 103      | 6         | 6         | 23        | 6         | 12        | 9         | Bacteria; Verrucomicrobia; Spartobacteria; Chthoniobacteriales; Chthoniobacteraceae               |
| Otu221  | 42      | 0       | 1       | 80       | 36      | 26       | 0         | 1         | 9         | 4         | 0         | 4         | Bacteria; Bacteroidetes; Flavobacteriia; Flavobacteriales; Cryomorphaceae; Fluviicola             |
| Otu222  | 79      | 49      | 77      | 140      | 32      | 169      | 53        | 60        | 95        | 50        | 97        | 79        | Bacteria; Proteobacteria; Betaproteobacteria                                                      |
| Otu223  | 109     | 14      | 49      | 87       | 20      | 99       | 44        | 62        | 29        | 50        | 21        | 10        | Bacteria; Verrucomicrobia; Opitutae; Opitutales; Opitutaceae; Opitutus                            |
| Otu224  | 13      | 6       | 24      | 49       | 20      | 89       | 41        | 53        | 28        | 37        | 49        | 26        | Bacteria; Planctomycetes; Phycisphaerae; WD2101                                                   |
| Otu225  | 134     | 6       | 4       | 20       | 7       | 18       | 22        | 32        | 5         | 6         | 0         | 5         | Bacteria; Bacteroidetes; Sphingobacteriia; Sphingobacteriales; Sphingobacteriaceae; Pedobacter    |
| Otu226  | 24      | 17      | 25      | 33       | 16      | 78       | 20        | 16        | 7         | 24        | 18        | 10        | Bacteria; Planctomycetes; Phycisphaerae; CPla-3                                                   |
| Otu227  | 21      | 25      | 31      | 34       | 29      | 87       | 59        | 61        | 70        | 31        | 34        | 21        | Bacteria; Acidobacteria; Acidobacteriia; Acidobacteriales; Koribacteraceae; Candidatus_Koribacter |
| Otu3889 | 0       | 1       | 0       | 1        | 0       | 0        | 0         | 0         | 0         | 2         | 0         | 0         | Bacteria; Chloroflexi; Ktedonobacteria; JG30-KF-AS9                                               |
| Otu3850 | 0       | 0       | 1       | 0        | 2       | 0        | 0         | 0         | 0         | 0         | 0         | 0         | Bacteria; Acidobacteria; Acidobacteria-6; iii1-15                                                 |
| Otu3088 | 3       | 0       | 1       | 3        | 0       | 0        | 5         | 0         | 1         | 1         | 0         | 0         | Bacteria; Acidobacteria; Acidobacteria-6; iii1-15                                                 |
| Otu3089 | 0       | 1       | 0       | 1        | 0       | 2        | 0         | 0         | 0         | 0         | 6         | 0         | Bacteria; Proteobacteria; Deltaproteobacteria; Desulfuromonadales                                 |
| Otu3084 | 0       | 0       | 0       | 2        | 0       | 0        | 0         | 0         | 0         | 0         | 2         | 0         | Bacteria; Proteobacteria                                                                          |

| #OTU ID | Z31DRh1 | Z31DRh2 | Z31DRh3 | Z31DRh4r | Z31DRh5 | Z31DRh6r | Z31J1DRh1 | Z31J1DRh2 | Z31J1DRh3 | Z31J1DRh4 | Z31J1DRh5 | Z31J1DRh6 | taxonomy                                                                                            |
|---------|---------|---------|---------|----------|---------|----------|-----------|-----------|-----------|-----------|-----------|-----------|-----------------------------------------------------------------------------------------------------|
| Otu3085 | 0       | 2       | 1       | 0        | 1       | 3        | 1         | 3         | 1         | 1         | 3         | 0         | Bacteria; Proteobacteria; Alphaproteobacteria; Rickettsiales; mitochondria                          |
| Otu3086 | 0       | 2       | 1       | 0        | 2       | 0        | 0         | 2         | 0         | 0         | 0         | 1         | Bacteria; Firmicutes; Bacilli; Bacillales; Thermoactinomycetaceae; Shimazuella                      |
| Otu3087 | 0       | 0       | 0       | 0        | 0       | 0        | 0         | 2         | 0         | 0         | 0         | 0         | Bacteria                                                                                            |
| Otu3080 | 0       | 0       | 0       | 0        | 0       | 2        | 0         | 0         | 0         | 0         | 0         | 0         | Bacteria; Chloroflexi; Ktedonobacteria; Thermogemmatissporales; Thermogemmatissporaceae             |
| Otu3081 | 0       | 1       | 0       | 5        | 0       | 0        | 1         | 1         | 0         | 0         | 2         | 0         | Bacteria; Chloroflexi; Anaerolineae; GCA004                                                         |
| Otu3082 | 0       | 1       | 0       | 2        | 0       | 0        | 0         | 0         | 0         | 0         | 0         | 0         | Bacteria; Planctomycetes; Planctomycetia; Gemmatales; Isosphaeraceae                                |
| Otu3083 | 2       | 1       | 2       | 0        | 1       | 1        | 1         | 0         | 2         | 1         | 8         | 1         | Bacteria; Nitrospirae; Nitrospira; Nitrospirales; 0319-6A21                                         |
| Otu2515 | 0       | 0       | 0       | 0        | 0       | 0        | 0         | 0         | 0         | 0         | 3         | 0         | Bacteria; Proteobacteria; Deltaproteobacteria; Myxococcales                                         |
| Otu3648 | 0       | 0       | 0       | 2        | 0       | 0        | 0         | 0         | 0         | 0         | 0         | 0         | Bacteria                                                                                            |
| Otu2514 | 3       | 0       | 0       | 0        | 0       | 1        | 1         | 0         | 0         | 0         | 0         | 0         | Bacteria; Proteobacteria; Alphaproteobacteria; Rhizobiales; Phyllobacteriaceae; Aminobacter         |
| Otu3646 | 0       | 0       | 0       | 0        | 0       | 2        | 2         | 1         | 0         | 1         | 0         | 0         | Bacteria; Cyanobacteria; ML635J-21                                                                  |
| Otu3647 | 0       | 0       | 0       | 0        | 0       | 3        | 0         | 0         | 0         | 0         | 0         | 0         | Bacteria; Proteobacteria; TA18; PHOS-HD29                                                           |
| Otu3644 | 0       | 1       | 0       | 1        | 3       | 0        | 0         | 0         | 0         | 0         | 0         | 2         | Bacteria; Proteobacteria; Betaproteobacteria                                                        |
| Otu3645 | 0       | 1       | 1       | 2        | 2       | 0        | 1         | 3         | 0         | 0         | 0         | 0         | Bacteria; Firmicutes; Clostridia; Clostridiales; Ruminococcaceae; Clostridium; Clostridium_hungatei |
| Otu3642 | 0       | 0       | 0       | 3        | 1       | 5        | 2         | 0         | 0         | 0         | 1         | 0         | Bacteria; Chloroflexi; Chloroflexi; Chloroflexales; FFCH7168                                        |
| Otu3643 | 0       | 1       | 0       | 3        | 0       | 0        | 0         | 0         | 0         | 0         | 0         | 0         | Bacteria; Chlorobi; OPB56                                                                           |
| Otu3640 | 0       | 0       | 16      | 6        | 0       | 0        | 0         | 3         | 9         | 0         | 0         | 0         | Bacteria; Verrucomicrobia; Spartobacteria; Chthoniobacteriales; Chthoniobacteraceae                 |
| Otu3641 | 0       | 1       | 1       | 0        | 0       | 3        | 3         | 1         | 3         | 0         | 3         | 0         | Bacteria; Elusimicrobia; Elusimicrobia; FAC88                                                       |
| Otu1107 | 3       | 1       | 0       | 0        | 11      | 0        | 1         | 0         | 0         | 2         | 6         | 0         | Bacteria; Acidobacteria; Sva0725; Sva0725                                                           |
| Otu1106 | 7       | 8       | 16      | 5        | 11      | 11       | 7         | 14        | 4         | 4         | 15        | 2         | Bacteria; Acidobacteria; Acidobacteria-6; iii1-15                                                   |
| Otu1105 | 6       | 8       | 2       | 10       | 7       | 9        | 2         | 5         | 6         | 1         | 8         | 8         | Bacteria; Proteobacteria; Gammaproteobacteria; Legionellales                                        |
| Otu1104 | 4       | 15      | 8       | 15       | 10      | 12       | 18        | 10        | 6         | 11        | 11        | 9         | Bacteria; Firmicutes; Bacilli; Bacillales; Planococcaceae                                           |



| #OTU ID | Z31DRh1 | Z31DRh2 | Z31DRh3 | Z31DRh4r | Z31DRh5 | Z31DRh6r | Z31J1DRh1 | Z31J1DRh2 | Z31J1DRh3 | Z31J1DRh4 | Z31J1DRh5 | Z31J1DRh6 | taxonomy                                                                                 |
|---------|---------|---------|---------|----------|---------|----------|-----------|-----------|-----------|-----------|-----------|-----------|------------------------------------------------------------------------------------------|
| Otu648  | 2       | 0       | 3       | 6        | 0       | 20       | 3         | 2         | 1         | 0         | 0         | 1         | Bacteria; Proteobacteria; Alphaproteobacteria; Rhizobiales                               |
| Otu649  | 14      | 10      | 31      | 25       | 5       | 25       | 15        | 15        | 22        | 9         | 14        | 7         | Bacteria; Planctomycetes; Phycisphaerae; WD2101                                          |
| Otu3573 | 1       | 2       | 0       | 0        | 0       | 0        | 0         | 0         | 0         | 0         | 0         | 0         | Bacteria; FBP                                                                            |
| Otu3994 | 0       | 0       | 0       | 0        | 0       | 0        | 0         | 0         | 2         | 0         | 0         | 0         | Bacteria                                                                                 |
| Otu4254 | 2       | 0       | 0       | 1        | 1       | 0        | 0         | 1         | 1         | 1         | 3         | 0         | Bacteria; Proteobacteria; Deltaproteobacteria; MIZ46                                     |
| Otu3995 | 1       | 0       | 0       | 0        | 1       | 2        | 0         | 0         | 0         | 0         | 0         | 0         | Bacteria; Chloroflexi; Anaerolineae; SBR1031; A4b                                        |
| Otu3575 | 0       | 0       | 0       | 0        | 2       | 0        | 0         | 0         | 0         | 0         | 0         | 0         | Bacteria; Chlamydiae; Chlamydia; Chlamydiales                                            |
| Otu2681 | 7       | 12      | 6       | 13       | 3       | 1        | 3         | 4         | 5         | 9         | 16        | 2         | Bacteria; Armatimonadetes; Armatimonadia; Armatimonadales; Armatimonadaceae              |
| Otu2680 | 2       | 0       | 1       | 5        | 2       | 8        | 9         | 2         | 2         | 0         | 0         | 1         | Bacteria; Bacteroidetes; Saprospirae; Saprospirales; Chitinophagaceae; Sediminibacterium |
| Otu2683 | 0       | 1       | 3       | 0        | 2       | 1        | 0         | 2         | 0         | 6         | 1         | 2         | Bacteria; Elusimicrobia; Elusimicrobia; FAC88                                            |
| Otu2682 | 0       | 0       | 0       | 0        | 2       | 0        | 0         | 0         | 2         | 0         | 0         | 0         | Bacteria; Proteobacteria; Deltaproteobacteria; MIZ46                                     |
| Otu2685 | 0       | 0       | 0       | 0        | 0       | 2        | 0         | 0         | 1         | 0         | 0         | 0         | Bacteria; Proteobacteria; Alphaproteobacteria; Rickettsiales; mitochondria               |
| Otu2684 | 0       | 0       | 0       | 0        | 0       | 0        | 0         | 0         | 0         | 2         | 0         | 0         | Bacteria                                                                                 |
| Otu2687 | 0       | 2       | 0       | 0        | 0       | 0        | 0         | 0         | 0         | 0         | 0         | 0         | Bacteria; Firmicutes; Clostridia; Clostridiales; Caldicoprobacteraceae; Caldicoprobacter |
| Otu2686 | 0       | 0       | 0       | 0        | 0       | 2        | 0         | 0         | 0         | 0         | 0         | 0         | Bacteria; Proteobacteria                                                                 |
| Otu2689 | 0       | 0       | 2       | 0        | 1       | 3        | 1         | 0         | 1         | 1         | 1         | 0         | Bacteria; Planctomycetes; Phycisphaerae; WD2101                                          |
| Otu2519 | 0       | 0       | 0       | 3        | 0       | 0        | 0         | 0         | 0         | 0         | 0         | 0         | Bacteria                                                                                 |
| Otu3577 | 2       | 0       | 0       | 0        | 0       | 0        | 0         | 0         | 0         | 0         | 0         | 0         | Bacteria; Armatimonadetes; Chthonomonadetes; Chthonomonadales; Chthonomonadaceae         |
| Otu4108 | 7       | 4       | 7       | 7        | 2       | 9        | 5         | 1         | 1         | 12        | 3         | 1         | Bacteria; Planctomycetes; Phycisphaerae; WD2101                                          |
| Otu2518 | 0       | 0       | 0       | 1        | 0       | 0        | 0         | 0         | 0         | 2         | 4         | 0         | Bacteria; GN02; 3BR-5F                                                                   |
| Otu4363 | 0       | 0       | 0       | 1        | 0       | 0        | 0         | 1         | 3         | 0         | 0         | 0         | Bacteria                                                                                 |
| Otu4258 | 0       | 0       | 0       | 0        | 2       | 0        | 0         | 0         | 0         | 0         | 0         | 0         | Bacteria; Firmicutes; Clostridia; Clostridiales                                          |

| #OTU ID | Z31DRh1 | Z31DRh2 | Z31DRh3 | Z31DRh4r | Z31DRh5 | Z31DRh6r | Z31J1DRh1 | Z31J1DRh2 | Z31J1DRh3 | Z31J1DRh4 | Z31J1DRh5 | Z31J1DRh6 | taxonomy                                                                                   |
|---------|---------|---------|---------|----------|---------|----------|-----------|-----------|-----------|-----------|-----------|-----------|--------------------------------------------------------------------------------------------|
| Otu1232 | 0       | 0       | 7       | 7        | 0       | 1        | 0         | 1         | 1         | 0         | 1         | 0         | Bacteria; Proteobacteria                                                                   |
| Otu3579 | 0       | 0       | 0       | 2        | 0       | 0        | 0         | 0         | 0         | 1         | 0         | 0         | Bacteria; Planctomycetes; Planctomycetia; Gemmatales; Gemmataceae                          |
| Otu3746 | 0       | 0       | 0       | 0        | 2       | 0        | 0         | 0         | 0         | 0         | 1         | 0         | Bacteria                                                                                   |
| Otu1819 | 0       | 0       | 2       | 5        | 0       | 0        | 0         | 0         | 0         | 0         | 0         | 2         | Bacteria; Firmicutes; Bacilli; Bacillales; Paenibacillaceae; Paenibacillus                 |
| Otu1818 | 0       | 5       | 1       | 1        | 1       | 1        | 1         | 1         | 2         | 0         | 1         | 0         | Bacteria; Armatimonadetes; 0319-6E2                                                        |
| Otu4439 | 0       | 0       | 0       | 0        | 0       | 3        | 0         | 0         | 0         | 0         | 0         | 0         | Bacteria; Proteobacteria; Deltaproteobacteria                                              |
| Otu3259 | 0       | 0       | 0       | 1        | 0       | 0        | 0         | 0         | 0         | 0         | 2         | 0         | Bacteria; Tenericutes; Mollicutes; Anaeroplasmatales; Anaeroplasmataceae; Asteroleplasma   |
| Otu3258 | 0       | 3       | 0       | 0        | 0       | 2        | 0         | 0         | 0         | 0         | 1         | 0         | Bacteria; Chloroflexi; Anaerolineae                                                        |
| Otu3287 | 1       | 1       | 0       | 3        | 0       | 0        | 2         | 0         | 0         | 0         | 0         | 0         | Bacteria; Chloroflexi; Chloroflexi; Roseiflexales; Kouleothrixaceae                        |
| Otu1811 | 0       | 1       | 2       | 0        | 3       | 4        | 0         | 1         | 0         | 0         | 1         | 0         | Bacteria; Chloroflexi; Anaerolineae; CFB-26                                                |
| Otu1810 | 0       | 0       | 6       | 2        | 0       | 0        | 0         | 0         | 0         | 0         | 0         | 0         | Bacteria; Proteobacteria; Gammaproteobacteria; Legionellales; Coxiellaceae                 |
| Otu1813 | 0       | 6       | 0       | 0        | 0       | 0        | 0         | 0         | 0         | 0         | 0         | 0         | Bacteria; Bacteroidetes; Sphingobacteria; Sphingobacteriales; Sphingobacteriaceae          |
| Otu1812 | 1       | 5       | 1       | 5        | 1       | 3        | 0         | 2         | 0         | 3         | 1         | 1         | Bacteria; Gemmatimonadetes; Gemmatimonadetes                                               |
| Otu1815 | 0       | 0       | 6       | 2        | 0       | 2        | 1         | 3         | 5         | 3         | 1         | 1         | Bacteria; Bacteroidetes; Cytophagia; Cytophagales; Cytophagaceae                           |
| Otu1814 | 1       | 3       | 1       | 1        | 0       | 8        | 0         | 1         | 0         | 2         | 0         | 1         | Bacteria; Planctomycetes; Planctomycetia; Gemmatales; Isosphaeraceae                       |
| Otu1817 | 5       | 13      | 0       | 22       | 7       | 51       | 10        | 15        | 15        | 10        | 9         | 4         | Bacteria; Bacteroidetes; Saprospirae; Saprospirales; Chitinophagaceae                      |
| Otu1816 | 3       | 4       | 1       | 4        | 4       | 18       | 2         | 6         | 3         | 1         | 3         | 8         | Bacteria; Proteobacteria; Alphaproteobacteria; Rhizobiales; Bradyrhizobiaceae; Balneimonas |
| Otu4319 | 0       | 0       | 0       | 0        | 0       | 0        | 0         | 0         | 0         | 0         | 2         | 0         | Bacteria; Proteobacteria; Alphaproteobacteria                                              |
| Otu2359 | 0       | 1       | 0       | 1        | 1       | 2        | 2         | 4         | 5         | 6         | 1         | 1         | Bacteria; Elusimicrobia; Elusimicrobia; FAC88                                              |
| Otu2358 | 0       | 0       | 3       | 2        | 1       | 3        | 7         | 5         | 4         | 4         | 1         | 1         | Bacteria; Proteobacteria; Alphaproteobacteria; Rickettsiales                               |
| Otu3741 | 0       | 0       | 0       | 0        | 0       | 0        | 0         | 0         | 0         | 0         | 0         | 2         | Bacteria; Bacteroidetes                                                                    |
| Otu4318 | 0       | 0       | 2       | 1        | 0       | 2        | 0         | 2         | 0         | 0         | 0         | 1         | Bacteria; Planctomycetes; Planctomycetia; Gemmatales; Isosphaeraceae                       |

| #OTU ID | Z31DRh1 | Z31DRh2 | Z31DRh3 | Z31DRh4r | Z31DRh5 | Z31DRh6r | Z31J1DRh1 | Z31J1DRh2 | Z31J1DRh3 | Z31J1DRh4 | Z31J1DRh5 | Z31J1DRh6 | taxonomy                                                                                           |
|---------|---------|---------|---------|----------|---------|----------|-----------|-----------|-----------|-----------|-----------|-----------|----------------------------------------------------------------------------------------------------|
| Otu2353 | 0       | 0       | 0       | 1        | 0       | 3        | 0         | 3         | 0         | 0         | 0         | 0         | Bacteria; Proteobacteria; Alphaproteobacteria; Rickettsiales                                       |
| Otu2352 | 0       | 0       | 0       | 0        | 1       | 1        | 1         | 1         | 3         | 1         | 0         | 2         | Bacteria; Proteobacteria; Deltaproteobacteria; Bdellovibrionales; Bdellovibrionaceae; Bdellovibrio |
| Otu2351 | 0       | 0       | 0       | 0        | 0       | 3        | 0         | 0         | 0         | 0         | 0         | 0         | Bacteria; Proteobacteria; Betaproteobacteria                                                       |
| Otu2350 | 3       | 1       | 2       | 1        | 2       | 2        | 4         | 1         | 4         | 2         | 1         | 0         | Bacteria; Proteobacteria; Deltaproteobacteria; MIZ46                                               |
| Otu2357 | 0       | 0       | 0       | 0        | 3       | 0        | 0         | 0         | 0         | 0         | 0         | 0         | Bacteria; Proteobacteria; Deltaproteobacteria; MIZ46                                               |
| Otu2356 | 1       | 0       | 1       | 3        | 1       | 1        | 2         | 0         | 0         | 2         | 0         | 0         | Bacteria; Proteobacteria; Gammaproteobacteria; Legionellales; Coxiellaceae                         |
| Otu2355 | 3       | 6       | 2       | 3        | 1       | 2        | 6         | 5         | 1         | 4         | 2         | 0         | Bacteria; Gemmatimonadetes; Gemmatimonadetes; Ellin5290                                            |
| Otu2354 | 30      | 12      | 31      | 26       | 14      | 8        | 7         | 22        | 8         | 7         | 10        | 12        | Bacteria; Proteobacteria; Alphaproteobacteria; Sphingomonadales; Sphingomonadaceae; Kaistobacter   |
| Otu3281 | 0       | 0       | 0       | 5        | 0       | 0        | 1         | 0         | 1         | 0         | 0         | 0         | Bacteria; OD1; SM2F11                                                                              |
| Otu2891 | 0       | 1       | 0       | 1        | 0       | 0        | 2         | 2         | 2         | 0         | 0         | 1         | Bacteria; Planctomycetes; Planctomycetia; Gemmatales; Isosphaeraceae                               |
| Otu4097 | 0       | 2       | 0       | 0        | 0       | 0        | 1         | 0         | 0         | 0         | 0         | 0         | Bacteria; OP11; OP11-3                                                                             |
| Otu3025 | 0       | 2       | 0       | 1        | 0       | 0        | 0         | 0         | 0         | 0         | 3         | 0         | Bacteria; Proteobacteria; Gammaproteobacteria; Legionellales; Coxiellaceae                         |
| Otu3975 | 0       | 0       | 0       | 0        | 0       | 0        | 0         | 2         | 0         | 0         | 0         | 0         | Bacteria                                                                                           |
| Otu2693 | 0       | 0       | 0       | 1        | 0       | 1        | 0         | 3         | 0         | 0         | 0         | 1         | Bacteria; Proteobacteria; Alphaproteobacteria; Rhizobiales; Xanthobacteraceae                      |
| Otu2230 | 0       | 3       | 0       | 0        | 0       | 2        | 1         | 1         | 0         | 0         | 0         | 0         | Bacteria                                                                                           |
| Otu2231 | 1       | 3       | 2       | 0        | 3       | 5        | 7         | 0         | 7         | 3         | 6         | 0         | Bacteria                                                                                           |
| Otu2232 | 0       | 0       | 0       | 2        | 4       | 0        | 1         | 0         | 0         | 2         | 0         | 0         | Bacteria; Cyanobacteria; 4C0d-2; MLE1-12                                                           |
| Otu2233 | 3       | 0       | 0       | 0        | 0       | 0        | 0         | 0         | 0         | 0         | 0         | 0         | Bacteria; Bacteroidetes; Sphingobacteriia; Sphingobacteriales                                      |
| Otu2234 | 0       | 2       | 0       | 0        | 0       | 1        | 3         | 0         | 0         | 1         | 0         | 0         | Bacteria; Proteobacteria; Gammaproteobacteria                                                      |
| Otu2235 | 5       | 0       | 0       | 0        | 0       | 5        | 0         | 1         | 0         | 0         | 0         | 0         | Bacteria; Planctomycetes; Phycisphaerae; WD2101                                                    |
| Otu2236 | 3       | 8       | 2       | 6        | 2       | 2        | 3         | 0         | 10        | 5         | 4         | 0         | Bacteria; Acidobacteria; Solibacteres; Solibacterales; Solibacteraceae; Candidatus_Solibacter      |
| Otu2237 | 0       | 0       | 0       | 0        | 1       | 4        | 0         | 1         | 0         | 0         | 6         | 0         | Bacteria; Chloroflexi; Chloroflexi; Roseiflexales; Kouleothrixaceae                                |

| #OTU ID | Z31DRh1 | Z31DRh2 | Z31DRh3 | Z31DRh4r | Z31DRh5 | Z31DRh6r | Z31J1DRh1 | Z31J1DRh2 | Z31J1DRh3 | Z31J1DRh4 | Z31J1DRh5 | Z31J1DRh6 | taxonomy                                                                                           |
|---------|---------|---------|---------|----------|---------|----------|-----------|-----------|-----------|-----------|-----------|-----------|----------------------------------------------------------------------------------------------------|
| Otu2238 | 0       | 0       | 0       | 0        | 7       | 0        | 0         | 2         | 0         | 0         | 0         | 0         | Bacteria; Proteobacteria; Deltaproteobacteria                                                      |
| Otu2239 | 0       | 0       | 0       | 3        | 0       | 0        | 0         | 0         | 0         | 0         | 0         | 0         | Bacteria; Proteobacteria; Betaproteobacteria                                                       |
| Otu3748 | 0       | 2       | 0       | 0        | 0       | 0        | 0         | 0         | 0         | 0         | 0         | 0         | Bacteria; Acidobacteria; Solibacteres; Solibacterales                                              |
| Otu4313 | 0       | 0       | 0       | 0        | 0       | 2        | 1         | 0         | 0         | 2         | 1         | 0         | Bacteria; Proteobacteria; Alphaproteobacteria; Rhodospirillales; Rhodospirillaceae                 |
| Otu3329 | 0       | 0       | 0       | 1        | 1       | 2        | 0         | 0         | 2         | 0         | 0         | 0         | Bacteria; Proteobacteria; Deltaproteobacteria; Myxococcales                                        |
| Otu3328 | 1       | 0       | 0       | 1        | 3       | 3        | 0         | 1         | 0         | 0         | 8         | 0         | Bacteria; Verrucomicrobia; Opitutae; Opitutales; Opitutaceae                                       |
| Otu4099 | 0       | 0       | 0       | 0        | 0       | 0        | 2         | 0         | 0         | 0         | 1         | 0         | Bacteria                                                                                           |
| Otu4389 | 0       | 0       | 0       | 0        | 0       | 0        | 2         | 0         | 0         | 0         | 0         | 0         | Bacteria; Proteobacteria; Deltaproteobacteria; Bdellovibrionales; Bdellovibrionaceae; Bdellovibrio |
| Otu3321 | 0       | 0       | 0       | 2        | 0       | 0        | 0         | 2         | 1         | 0         | 0         | 1         | Bacteria                                                                                           |
| Otu3320 | 1       | 0       | 2       | 0        | 0       | 0        | 0         | 0         | 0         | 0         | 0         | 0         | Bacteria; Proteobacteria; Alphaproteobacteria; Rhodospirillales; Rhodospirillaceae; Phaeospirillum |
| Otu3323 | 0       | 0       | 0       | 0        | 1       | 0        | 0         | 0         | 2         | 0         | 0         | 0         | Bacteria; Bacteroidetes; Cytophagia; Cytophagales; Amoebofilaceae                                  |
| Otu3322 | 0       | 0       | 0       | 0        | 2       | 0        | 0         | 0         | 0         | 0         | 0         | 0         | Bacteria; Proteobacteria                                                                           |
| Otu3325 | 0       | 0       | 0       | 2        | 0       | 0        | 0         | 0         | 0         | 0         | 0         | 0         | Bacteria; Proteobacteria                                                                           |
| Otu3324 | 0       | 0       | 1       | 2        | 0       | 1        | 0         | 0         | 0         | 0         | 0         | 0         | Bacteria; Proteobacteria; Gammaproteobacteria; Legionellales; Coxiellaceae; Aquicella              |
| Otu3327 | 4       | 2       | 4       | 4        | 1       | 3        | 9         | 5         | 7         | 2         | 5         | 1         | Bacteria; Actinobacteria; Actinobacteria; Actinomycetales; Micromonosporaceae                      |
| Otu3326 | 0       | 2       | 2       | 1        | 0       | 1        | 2         | 1         | 1         | 0         | 3         | 0         | Bacteria; Proteobacteria; Deltaproteobacteria                                                      |
| Otu4167 | 0       | 0       | 0       | 4        | 0       | 0        | 0         | 0         | 0         | 0         | 0         | 0         | Bacteria; Proteobacteria; Gammaproteobacteria; Legionellales; Coxiellaceae                         |
| Otu4317 | 0       | 0       | 0       | 0        | 0       | 0        | 2         | 0         | 0         | 0         | 0         | 0         | Bacteria; Acidobacteria; Solibacteres; Solibacterales                                              |
| Otu4316 | 3       | 3       | 2       | 2        | 1       | 0        | 1         | 0         | 2         | 0         | 3         | 0         | Bacteria                                                                                           |
| Otu1671 | 0       | 0       | 0       | 3        | 1       | 5        | 2         | 4         | 1         | 0         | 2         | 1         | Bacteria; Actinobacteria; Actinobacteria; Actinomycetales                                          |
| Otu1670 | 5       | 0       | 3       | 0        | 3       | 1        | 1         | 3         | 2         | 10        | 3         | 1         | Bacteria; Gemmatimonadetes; Gemmatimonadetes; Gemmatimonadales                                     |
| Otu1673 | 1       | 0       | 0       | 0        | 0       | 4        | 1         | 0         | 0         | 0         | 1         | 1         | Bacteria; OD1; ZB2                                                                                 |



| #OTU ID | Z31DRh1 | Z31DRh2 | Z31DRh3 | Z31DRh4r | Z31DRh5 | Z31DRh6r | Z31J1DRh1 | Z31J1DRh2 | Z31J1DRh3 | Z31J1DRh4 | Z31J1DRh5 | Z31J1DRh6 | taxonomy                                                                                       |
|---------|---------|---------|---------|----------|---------|----------|-----------|-----------|-----------|-----------|-----------|-----------|------------------------------------------------------------------------------------------------|
| Otu1672 | 0       | 3       | 0       | 4        | 0       | 1        | 0         | 1         | 0         | 0         | 0         | 0         | Bacteria; WS3; PRR-12; Sediment-1                                                              |
| Otu1675 | 11      | 16      | 4       | 14       | 9       | 23       | 20        | 11        | 6         | 4         | 12        | 1         | Bacteria; Actinobacteria; Thermoleophilia; Solirubrobacterales                                 |
| Otu1674 | 0       | 0       | 0       | 0        | 0       | 4        | 0         | 0         | 0         | 0         | 0         | 0         | Bacteria; Chloroflexi; Anaerolineae; Anaerolineales; Anaerolinaceae                            |
| Otu1677 | 1       | 0       | 0       | 3        | 0       | 4        | 4         | 2         | 0         | 1         | 0         | 0         | Bacteria; Proteobacteria; Alphaproteobacteria; Rhizobiales; Hyphomicrobiaceae; Rhodoplanes     |
| Otu1676 | 1       | 9       | 1       | 4        | 3       | 7        | 4         | 1         | 0         | 0         | 6         | 2         | Bacteria; Planctomycetes; Planctomycetia; Gemmatales; Gemmataceae                              |
| Otu1679 | 0       | 0       | 0       | 1        | 0       | 7        | 2         | 0         | 0         | 0         | 0         | 0         | Bacteria; Chloroflexi; Anaerolineae; envOPS12                                                  |
| Otu1678 | 0       | 7       | 3       | 2        | 1       | 2        | 5         | 4         | 2         | 2         | 7         | 1         | Bacteria; Chlamydiae; Chlamydia; Chlamydiales; Rhabdochlamydiaceae; Candidatus_Rhabdochlamydia |
| Otu2126 | 0       | 0       | 3       | 0        | 0       | 0        | 0         | 0         | 0         | 0         | 0         | 0         | Bacteria; Bacteroidetes                                                                        |
| Otu2127 | 0       | 0       | 0       | 0        | 0       | 4        | 0         | 0         | 0         | 0         | 0         | 0         | Bacteria                                                                                       |
| Otu2120 | 1       | 2       | 1       | 0        | 1       | 3        | 0         | 1         | 0         | 1         | 2         | 0         | Bacteria; Chloroflexi; Ellin6529                                                               |
| Otu2121 | 3       | 0       | 6       | 4        | 1       | 6        | 1         | 2         | 1         | 2         | 1         | 0         | Bacteria; Planctomycetes; vadinHA49; DH61                                                      |
| Otu2122 | 0       | 0       | 0       | 3        | 0       | 0        | 0         | 0         | 0         | 0         | 0         | 0         | Bacteria; Proteobacteria; Deltaproteobacteria; FAC87                                           |
| Otu2123 | 0       | 0       | 0       | 0        | 2       | 4        | 0         | 0         | 1         | 0         | 4         | 0         | Bacteria; Bacteroidetes; Cytophagia; Cytophagales; Cytophagaceae                               |
| Otu4259 | 0       | 0       | 0       | 1        | 0       | 0        | 0         | 0         | 0         | 0         | 2         | 0         | Bacteria; Proteobacteria; Alphaproteobacteria                                                  |
| Otu3650 | 2       | 0       | 0       | 1        | 0       | 1        | 2         | 1         | 0         | 1         | 1         | 0         | Bacteria; Chlamydiae; Chlamydia; Chlamydiales                                                  |
| Otu4377 | 4       | 13      | 7       | 9        | 5       | 5        | 13        | 41        | 25        | 27        | 13        | 4         | Bacteria; Bacteroidetes; Saprospirae; Saprospirales; Chitinophagaceae; Flavisolibacter         |
| Otu1803 | 0       | 4       | 0       | 0        | 5       | 3        | 2         | 2         | 0         | 2         | 2         | 0         | Bacteria; Planctomycetes; Phycisphaerae; CPLa-3                                                |
| Otu1634 | 0       | 0       | 0       | 4        | 0       | 0        | 0         | 1         | 0         | 1         | 0         | 0         | Bacteria; Proteobacteria; Deltaproteobacteria; MIZ46                                           |
| Otu4417 | 2       | 0       | 0       | 1        | 0       | 0        | 0         | 0         | 0         | 0         | 0         | 0         | Bacteria; Proteobacteria; Alphaproteobacteria; Rickettsiales; mitochondria                     |
| Otu1186 | 2       | 4       | 3       | 10       | 3       | 4        | 3         | 1         | 1         | 4         | 7         | 4         | Bacteria; Actinobacteria; Thermoleophilia; Gaiellales; Gaiellaceae                             |
| Otu3168 | 0       | 1       | 0       | 1        | 0       | 0        | 0         | 0         | 2         | 0         | 0         | 0         | Bacteria; Proteobacteria; Betaproteobacteria                                                   |
| Otu4386 | 0       | 1       | 0       | 2        | 0       | 0        | 0         | 0         | 0         | 1         | 0         | 0         | Bacteria; Armatimonadetes; OPB50                                                               |

| #OTU ID | Z31DRh1 | Z31DRh2 | Z31DRh3 | Z31DRh4r | Z31DRh5 | Z31DRh6r | Z31J1DRh1 | Z31J1DRh2 | Z31J1DRh3 | Z31J1DRh4 | Z31J1DRh5 | Z31J1DRh6 | taxonomy                                                                           |
|---------|---------|---------|---------|----------|---------|----------|-----------|-----------|-----------|-----------|-----------|-----------|------------------------------------------------------------------------------------|
| Otu4165 | 0       | 0       | 0       | 0        | 1       | 0        | 1         | 1         | 2         | 1         | 0         | 0         | Bacteria; Proteobacteria; Alphaproteobacteria                                      |
| Otu3968 | 0       | 2       | 0       | 0        | 0       | 0        | 0         | 0         | 0         | 0         | 0         | 0         | Bacteria; Acidobacteria; S035                                                      |
| Otu2908 | 0       | 2       | 0       | 1        | 0       | 0        | 0         | 0         | 0         | 0         | 0         | 0         | Bacteria; Chloroflexi; Anaerolineae; envOPS12                                      |
| Otu2909 | 1       | 6       | 0       | 0        | 1       | 1        | 0         | 0         | 0         | 0         | 1         | 0         | Bacteria; Proteobacteria; Deltaproteobacteria; Myxococcales; OM27                  |
| Otu2906 | 0       | 0       | 0       | 0        | 0       | 0        | 0         | 0         | 2         | 0         | 0         | 0         | Bacteria; Proteobacteria                                                           |
| Otu2907 | 1       | 0       | 3       | 0        | 0       | 1        | 4         | 2         | 2         | 5         | 1         | 2         | Bacteria; Planctomycetes; Phycisphaerae; WD2101                                    |
| Otu2904 | 0       | 0       | 2       | 0        | 0       | 0        | 0         | 0         | 0         | 0         | 0         | 0         | Bacteria                                                                           |
| Otu2905 | 2       | 0       | 1       | 0        | 0       | 0        | 0         | 1         | 0         | 0         | 0         | 0         | Bacteria; Planctomycetes; Planctomycetia; Gemmatales; Gemmataceae; Gemmata         |
| Otu2902 | 0       | 0       | 0       | 0        | 0       | 0        | 0         | 2         | 0         | 0         | 0         | 0         | Bacteria; Proteobacteria; Gammaproteobacteria; Legionellales; Legionellaceae       |
| Otu2903 | 1       | 1       | 0       | 0        | 0       | 0        | 3         | 1         | 1         | 3         | 1         | 1         | Bacteria                                                                           |
| Otu2900 | 0       | 0       | 0       | 0        | 0       | 0        | 0         | 0         | 0         | 0         | 0         | 2         | Bacteria; Chloroflexi; Ellin6529                                                   |
| Otu2901 | 3       | 1       | 6       | 2        | 0       | 2        | 9         | 3         | 4         | 10        | 4         | 3         | Bacteria; Gemmatimonadetes; Gemmatimonadetes; Ellin5290                            |
| Otu1240 | 1       | 2       | 8       | 1        | 1       | 3        | 1         | 0         | 0         | 0         | 8         | 0         | Bacteria; Chloroflexi; Anaerolineae; SBR1031; oc28                                 |
| Otu1241 | 6       | 3       | 6       | 14       | 3       | 22       | 7         | 17        | 3         | 21        | 13        | 3         | Bacteria; Proteobacteria; Alphaproteobacteria                                      |
| Otu1242 | 14      | 105     | 28      | 51       | 23      | 103      | 69        | 65        | 39        | 42        | 51        | 19        | Bacteria; Verrucomicrobia; Pedosphaerae; Pedosphaerales; Ellin517                  |
| Otu1243 | 9       | 4       | 6       | 9        | 1       | 8        | 7         | 12        | 6         | 6         | 2         | 3         | Bacteria; Proteobacteria; Deltaproteobacteria; Myxococcales                        |
| Otu1244 | 0       | 2       | 0       | 2        | 1       | 6        | 7         | 6         | 1         | 6         | 1         | 1         | Bacteria; Elusimicrobia; Elusimicrobia; Ilb                                        |
| Otu1245 | 1       | 1       | 1       | 2        | 12      | 0        | 1         | 0         | 0         | 2         | 10        | 0         | Bacteria; Bacteroidetes; Saprospirae; Saprospirales; Chitinophagaceae              |
| Otu1246 | 1       | 2       | 2       | 2        | 0       | 7        | 3         | 5         | 1         | 0         | 0         | 0         | Bacteria; Proteobacteria; Gammaproteobacteria; Xanthomonadales; Xanthomonadaceae   |
| Otu1247 | 0       | 0       | 0       | 0        | 0       | 0        | 0         | 0         | 0         | 8         | 0         | 0         | Bacteria; Gemmatimonadetes; Gemmatimonadetes; Gemmatimonadales; Ellin5301          |
| Otu1248 | 0       | 12      | 3       | 1        | 3       | 9        | 6         | 0         | 0         | 2         | 14        | 0         | Bacteria; Proteobacteria; Deltaproteobacteria; Myxococcales                        |
| Otu1249 | 6       | 12      | 3       | 2        | 14      | 2        | 7         | 10        | 10        | 10        | 12        | 0         | Bacteria; Proteobacteria; Alphaproteobacteria; Rhodospirillales; Rhodospirillaceae |

| #OTU ID | Z31DRh1 | Z31DRh2 | Z31DRh3 | Z31DRh4r | Z31DRh5 | Z31DRh6r | Z31J1DRh1 | Z31J1DRh2 | Z31J1DRh3 | Z31J1DRh4 | Z31J1DRh5 | Z31J1DRh6 | taxonomy                                                                                                            |
|---------|---------|---------|---------|----------|---------|----------|-----------|-----------|-----------|-----------|-----------|-----------|---------------------------------------------------------------------------------------------------------------------|
| Otu1809 | 0       | 2       | 0       | 2        | 1       | 7        | 0         | 0         | 1         | 0         | 4         | 0         | Bacteria; Bacteroidetes; Cytophagia; Cytophagales; Cytophagaceae                                                    |
| Otu1482 | 0       | 0       | 1       | 2        | 0       | 5        | 4         | 4         | 0         | 0         | 1         | 2         | Bacteria; Armatimonadetes; Chthonomonadetes; Chthonomonadales; Chthonomonadaceae                                    |
| Otu1483 | 131     | 30      | 39      | 123      | 57      | 133      | 29        | 9         | 10        | 20        | 78        | 14        | Bacteria; Proteobacteria; Betaproteobacteria; Burkholderiales; Comamonadaceae                                       |
| Otu1480 | 3       | 7       | 3       | 8        | 8       | 6        | 3         | 8         | 1         | 5         | 4         | 5         | Bacteria; Planctomycetes; Planctomycetia; Pirellulales; Pirellulaceae; Pirellula                                    |
| Otu1481 | 1       | 8       | 1       | 0        | 0       | 4        | 0         | 0         | 0         | 0         | 0         | 0         | Bacteria; Verrucomicrobia; Spartobacteria; Chthoniobacteriales; Chthoniobacteraceae; Candidatus_Xiphinematobacter   |
| Otu1486 | 17      | 8       | 11      | 17       | 13      | 37       | 27        | 15        | 24        | 19        | 10        | 21        | Bacteria; Proteobacteria; Gammaproteobacteria; Xanthomonadales; Sinobacteraceae                                     |
| Otu1487 | 5       | 3       | 13      | 5        | 1       | 7        | 6         | 10        | 5         | 7         | 3         | 3         | Bacteria; Planctomycetes; Phycisphaerae; WD2101                                                                     |
| Otu1484 | 3       | 1       | 1       | 5        | 2       | 10       | 5         | 7         | 10        | 1         | 2         | 6         | Bacteria; Actinobacteria; Actinobacteria; Actinomycetales; Intrasporangiaceae; Oryzihumus; Oryzihumus_leptocrescens |
| Otu1485 | 5       | 11      | 1       | 5        | 3       | 1        | 4         | 3         | 1         | 5         | 5         | 5         | Bacteria; Proteobacteria; Alphaproteobacteria; Rhodospirillales; Rhodospirillaceae                                  |
| Otu1488 | 0       | 2       | 2       | 5        | 1       | 4        | 0         | 0         | 1         | 5         | 2         | 2         | Bacteria; Planctomycetes; Planctomycetia; Gemmatales; Gemmataceae; Gemmata                                          |
| Otu1489 | 0       | 1       | 2       | 12       | 0       | 1        | 3         | 6         | 0         | 2         | 3         | 1         | Bacteria; Tenericutes; Mollicutes; Anaeroplasmatales; Anaeroplasmataceae; Asteroleplasma                            |
| Otu3121 | 3       | 3       | 0       | 0        | 1       | 0        | 0         | 0         | 0         | 1         | 0         | 0         | Bacteria; Verrucomicrobia; Spartobacteria; Chthoniobacteriales; Chthoniobacteraceae; Candidatus_Xiphinematobacter   |
| Otu3120 | 0       | 0       | 3       | 1        | 2       | 1        | 0         | 0         | 2         | 0         | 0         | 0         | Bacteria; WS3; PRR-12; Sediment-1; PRR-10                                                                           |
| Otu4418 | 0       | 1       | 0       | 0        | 0       | 2        | 0         | 1         | 2         | 0         | 0         | 0         | Bacteria; Planctomycetes; Planctomycetia; Gemmatales; Gemmataceae                                                   |
| Otu2006 | 1       | 0       | 0       | 0        | 0       | 3        | 0         | 0         | 0         | 2         | 3         | 0         | Bacteria; Armatimonadetes; Fimbriimonadia; Fimbriimonadales; Fimbriimonadaceae; Fimbriimonas                        |
| Otu3127 | 2       | 1       | 1       | 2        | 1       | 1        | 2         | 0         | 2         | 0         | 0         | 1         | Bacteria; Chloroflexi; Anaerolineae; GCA004                                                                         |
| Otu3126 | 0       | 0       | 0       | 0        | 0       | 0        | 0         | 0         | 0         | 1         | 2         | 0         | Bacteria; OD1; ZB2                                                                                                  |
| Otu3413 | 0       | 0       | 0       | 2        | 0       | 1        | 0         | 0         | 1         | 3         | 0         | 4         | Bacteria; Bacteroidetes; Cytophagia; Cytophagales; Cytophagaceae; Hymenobacter                                      |
| Otu3412 | 0       | 0       | 0       | 0        | 0       | 3        | 0         | 0         | 0         | 0         | 0         | 0         | Bacteria; Chloroflexi; Ktedonobacteria; Thermogemmatisporales; Thermogemmatisporaceae                               |
| Otu3411 | 0       | 1       | 0       | 0        | 2       | 0        | 3         | 2         | 2         | 0         | 4         | 0         | Bacteria; Proteobacteria; Deltaproteobacteria; Myxococcales; Polyangiaceae                                          |
| Otu3410 | 2       | 0       | 0       | 0        | 0       | 0        | 0         | 0         | 0         | 0         | 0         | 0         | Bacteria; Chloroflexi; Anaerolineae; Caldilineales; Caldilineaceae                                                  |
| Otu3417 | 0       | 0       | 0       | 0        | 2       | 1        | 0         | 0         | 0         | 0         | 0         | 0         | Bacteria; OD1; ZB2                                                                                                  |

| #OTU ID | Z31DRh1 | Z31DRh2 | Z31DRh3 | Z31DRh4r | Z31DRh5 | Z31DRh6r | Z31J1DRh1 | Z31J1DRh2 | Z31J1DRh3 | Z31J1DRh4 | Z31J1DRh5 | Z31J1DRh6 | taxonomy                                                                                                               |
|---------|---------|---------|---------|----------|---------|----------|-----------|-----------|-----------|-----------|-----------|-----------|------------------------------------------------------------------------------------------------------------------------|
| Otu3125 | 0       | 0       | 0       | 0        | 2       | 0        | 0         | 0         | 0         | 0         | 0         | 0         | Bacteria; Chlamydiae; Chlamydiia; Chlamydiales                                                                         |
| Otu3415 | 1       | 0       | 0       | 0        | 1       | 1        | 2         | 5         | 0         | 1         | 0         | 1         | Bacteria                                                                                                               |
| Otu3414 | 2       | 0       | 0       | 0        | 0       | 2        | 0         | 0         | 0         | 0         | 0         | 2         | Bacteria; Bacteroidetes; Saprospirae; Saprospirales; Chitinophagaceae                                                  |
| Otu2003 | 3       | 0       | 0       | 0        | 1       | 0        | 0         | 0         | 1         | 1         | 0         | 3         | Bacteria; Proteobacteria                                                                                               |
| Otu3419 | 0       | 1       | 0       | 3        | 0       | 0        | 0         | 0         | 0         | 0         | 0         | 0         | Bacteria; Proteobacteria; Deltaproteobacteria; Myxococcales                                                            |
| Otu3124 | 0       | 0       | 0       | 0        | 0       | 0        | 0         | 0         | 0         | 3         | 0         | 2         | Bacteria; Chlamydiae; Chlamydiia; Chlamydiales                                                                         |
| Otu2711 | 1       | 1       | 1       | 2        | 1       | 5        | 6         | 0         | 1         | 1         | 0         | 1         | Bacteria; Planctomycetes; Planctomycetia; Gemmatales; Gemmataceae                                                      |
| Otu2002 | 1       | 6       | 0       | 0        | 0       | 0        | 3         | 0         | 0         | 0         | 0         | 0         | Bacteria; Proteobacteria; Gammaproteobacteria; Xanthomonadales; Xanthomonadaceae                                       |
| Otu2710 | 4       | 3       | 4       | 4        | 3       | 6        | 2         | 1         | 1         | 10        | 1         | 2         | Bacteria; Gemmatimonadetes; Gemmatimonadetes                                                                           |
| Otu4171 | 0       | 0       | 0       | 0        | 0       | 0        | 0         | 0         | 0         | 0         | 0         | 2         | Bacteria; Proteobacteria; Betaproteobacteria; Burkholderiales; Comamonadaceae                                          |
| Otu2000 | 1       | 4       | 4       | 3        | 0       | 4        | 4         | 1         | 3         | 3         | 3         | 0         | Bacteria; Proteobacteria; Gammaproteobacteria; Legionellales                                                           |
| Otu3354 | 8       | 6       | 3       | 9        | 5       | 21       | 8         | 11        | 4         | 4         | 4         | 3         | Bacteria; Proteobacteria; Alphaproteobacteria; Ellin329                                                                |
| Otu4170 | 0       | 0       | 0       | 2        | 0       | 0        | 3         | 0         | 0         | 0         | 0         | 0         | Bacteria; Proteobacteria; Alphaproteobacteria                                                                          |
| Otu3669 | 0       | 0       | 0       | 0        | 0       | 0        | 0         | 0         | 0         | 0         | 2         | 0         | Bacteria; Proteobacteria                                                                                               |
| Otu4173 | 0       | 1       | 1       | 0        | 0       | 1        | 1         | 0         | 1         | 2         | 0         | 2         | Bacteria; Proteobacteria; Gammaproteobacteria                                                                          |
| Otu2008 | 0       | 1       | 1       | 0        | 3       | 2        | 0         | 0         | 0         | 0         | 0         | 2         | Bacteria; Chlamydiae; Chlamydiia                                                                                       |
| Otu2619 | 0       | 0       | 2       | 1        | 0       | 0        | 0         | 0         | 1         | 0         | 0         | 1         | Bacteria; Bacteroidetes; Cytophagia; Cytophagales; Cytophagaceae; Spirosoma                                            |
| Otu4172 | 0       | 2       | 0       | 0        | 0       | 0        | 0         | 0         | 0         | 0         | 0         | 0         | Bacteria; OD1; ZB2                                                                                                     |
| Otu83   | 85      | 75      | 94      | 212      | 57      | 162      | 118       | 247       | 210       | 120       | 174       | 72        | Bacteria; Acidobacteria; Acidobacteriia; Acidobacteriales; Koribacteraceae                                             |
| Otu82   | 17      | 1       | 3       | 16       | 3       | 24       | 12        | 220       | 31        | 3         | 15        | 1         | Bacteria; Armatimonadetes; Fimbriimonadia; Fimbriimonadales; Fimbriimonadaceae                                         |
| Otu81   | 136     | 78      | 88      | 260      | 62      | 345      | 151       | 105       | 96        | 153       | 69        | 133       | Bacteria; Proteobacteria; Alphaproteobacteria; Ellin329                                                                |
| Otu80   | 55      | 4       | 11      | 21       | 219     | 104      | 2         | 8         | 0         | 4         | 7         | 133       | Bacteria; Bacteroidetes; Flavobacteriia; Flavobacteriales; Flavobacteriaceae; Flavobacterium; Flavobacterium_columnare |

| #OTU ID | Z31DRh1 | Z31DRh2 | Z31DRh3 | Z31DRh4r | Z31DRh5 | Z31DRh6r | Z31J1DRh1 | Z31J1DRh2 | Z31J1DRh3 | Z31J1DRh4 | Z31J1DRh5 | Z31J1DRh6 | taxonomy                                                                                                                         |
|---------|---------|---------|---------|----------|---------|----------|-----------|-----------|-----------|-----------|-----------|-----------|----------------------------------------------------------------------------------------------------------------------------------|
| Otu87   | 9       | 8       | 120     | 275      | 14      | 20       | 14        | 7         | 20        | 4         | 0         | 6         | Bacteria; Verrucomicrobia; Opiritae; Opiritales; Opiritaceae; Opiritus                                                           |
| Otu86   | 1       | 6       | 14      | 274      | 8       | 18       | 8         | 11        | 11        | 7         | 1         | 14        | Bacteria; Bacteroidetes; Saprospirae; Saprospirales; Chitinophagaceae                                                            |
| Otu85   | 2       | 0       | 0       | 1        | 14      | 265      | 0         | 0         | 0         | 3         | 0         | 1         | Bacteria; Cyanobacteria                                                                                                          |
| Otu84   | 0       | 10      | 1       | 198      | 4       | 6        | 1         | 5         | 1         | 4         | 0         | 12        | Bacteria; Bacteroidetes; Sphingobacteria; Sphingobacteriales                                                                     |
| Otu89   | 301     | 1       | 104     | 131      | 10      | 236      | 14        | 19        | 10        | 22        | 5         | 153       | Bacteria; Bacteroidetes; Sphingobacteria; Sphingobacteriales; Sphingobacteriaceae; Sphingobacterium; Sphingobacterium_multivorum |
| Otu88   | 28      | 13      | 48      | 236      | 18      | 107      | 12        | 11        | 19        | 15        | 8         | 17        | Bacteria; Proteobacteria; Gammaproteobacteria; Xanthomonadales; Xanthomonadaceae; Dyella                                         |
| Otu2719 | 0       | 0       | 0       | 2        | 0       | 0        | 0         | 0         | 0         | 0         | 0         | 0         | Bacteria; Firmicutes; Bacilli; Bacillales; Bacillaceae                                                                           |
| Otu975  | 4       | 10      | 8       | 21       | 8       | 57       | 13        | 27        | 9         | 9         | 20        | 9         | Bacteria; Acidobacteria; Solibacteres; Solibacterales; Solibacteraceae; Candidatus_Solibacter                                    |
| Otu2718 | 0       | 0       | 2       | 0        | 0       | 1        | 0         | 1         | 1         | 0         | 0         | 0         | Bacteria; Actinobacteria; Acidimicrobia; Acidimicrobiales; EB1017                                                                |
| Otu4199 | 0       | 0       | 0       | 0        | 0       | 0        | 0         | 2         | 0         | 0         | 0         | 0         | Bacteria; Proteobacteria; Gammaproteobacteria; Legionellales                                                                     |
| Otu4198 | 0       | 0       | 0       | 0        | 2       | 0        | 0         | 0         | 0         | 1         | 0         | 0         | Bacteria; Proteobacteria; Gammaproteobacteria; Legionellales                                                                     |
| Otu4197 | 0       | 0       | 0       | 0        | 0       | 1        | 0         | 0         | 0         | 3         | 0         | 0         | Bacteria; Proteobacteria; Deltaproteobacteria; MIZ46                                                                             |
| Otu4179 | 0       | 2       | 0       | 1        | 0       | 3        | 1         | 1         | 0         | 1         | 2         | 0         | Bacteria; Proteobacteria; Deltaproteobacteria; Myxococcales; Cystobacterineae                                                    |
| Otu4195 | 0       | 0       | 0       | 2        | 0       | 0        | 0         | 0         | 0         | 0         | 0         | 0         | Bacteria                                                                                                                         |
| Otu4194 | 0       | 0       | 0       | 0        | 1       | 1        | 3         | 1         | 0         | 2         | 1         | 2         | Bacteria; Firmicutes; Bacilli; Bacillales; Paenibacillaceae; Paenibacillus                                                       |
| Otu4193 | 0       | 0       | 0       | 0        | 0       | 0        | 0         | 0         | 0         | 0         | 2         | 0         | Bacteria; Proteobacteria; Deltaproteobacteria; Syntrophobacteriales; Syntrophobacteraceae                                        |
| Otu4192 | 0       | 3       | 0       | 0        | 0       | 0        | 0         | 0         | 0         | 0         | 0         | 0         | Bacteria; Proteobacteria; Alphaproteobacteria; Rickettsiales                                                                     |
| Otu4191 | 0       | 1       | 0       | 0        | 0       | 0        | 0         | 0         | 3         | 1         | 1         | 0         | Bacteria; Planctomycetes; Planctomycetia; Gemmatales; Gemmataceae                                                                |
| Otu4178 | 0       | 2       | 0       | 0        | 0       | 1        | 0         | 0         | 3         | 2         | 3         | 0         | Bacteria; Proteobacteria                                                                                                         |
| Otu4387 | 2       | 0       | 0       | 0        | 0       | 0        | 0         | 0         | 0         | 1         | 0         | 0         | Bacteria                                                                                                                         |
| Otu3529 | 0       | 7       | 4       | 2        | 2       | 21       | 8         | 12        | 3         | 3         | 6         | 0         | Bacteria; Acidobacteria; Solibacteres; Solibacterales; Solibacteraceae; Candidatus_Solibacter                                    |
| Otu3528 | 2       | 0       | 0       | 1        | 0       | 0        | 1         | 0         | 2         | 0         | 1         | 0         | Bacteria                                                                                                                         |

| #OTU ID | Z31DRh1 | Z31DRh2 | Z31DRh3 | Z31DRh4r | Z31DRh5 | Z31DRh6r | Z31J1DRh1 | Z31J1DRh2 | Z31J1DRh3 | Z31J1DRh4 | Z31J1DRh5 | Z31J1DRh6 | taxonomy                                                                                                        |
|---------|---------|---------|---------|----------|---------|----------|-----------|-----------|-----------|-----------|-----------|-----------|-----------------------------------------------------------------------------------------------------------------|
| Otu3527 | 0       | 0       | 0       | 0        | 1       | 0        | 0         | 2         | 0         | 0         | 2         | 0         | Bacteria; Cyanobacteria; Chloroplast; Chlorophyta; Chlamydomonadaceae; Chlamydomonas; Chlamydomonas_reinhardtii |
| Otu3526 | 0       | 0       | 1       | 2        | 4       | 0        | 0         | 0         | 0         | 2         | 0         | 0         | Bacteria; OD1; ZB2                                                                                              |
| Otu3525 | 2       | 1       | 6       | 12       | 3       | 4        | 2         | 8         | 7         | 9         | 2         | 3         | Bacteria; Gemmatimonadetes; Gemmatimonadetes; Ellin5290                                                         |
| Otu595  | 1       | 1       | 6       | 2        | 1       | 6        | 0         | 0         | 25        | 1         | 0         | 6         | Bacteria; Bacteroidetes; Cytophagia; Cytophagales; Cytophagaceae; Cytophaga                                     |
| Otu3523 | 0       | 0       | 0       | 0        | 0       | 0        | 2         | 0         | 0         | 0         | 0         | 0         | Bacteria; Proteobacteria                                                                                        |
| Otu3522 | 4       | 12      | 0       | 7        | 2       | 2        | 3         | 2         | 1         | 3         | 11        | 0         | Bacteria; Gemmatimonadetes; Gemmatimonadetes; Ellin5290                                                         |
| Otu3521 | 0       | 0       | 0       | 0        | 0       | 0        | 0         | 2         | 0         | 0         | 0         | 0         | Bacteria; TM6; SJA-4                                                                                            |
| Otu3520 | 0       | 0       | 0       | 0        | 0       | 0        | 2         | 0         | 1         | 0         | 0         | 0         | Bacteria; Proteobacteria; Gammaproteobacteria; Legionellales; Coxiellaceae; Aquicella                           |
| Otu501  | 2       | 8       | 0       | 6        | 33      | 12       | 10        | 2         | 6         | 9         | 36        | 20        | Bacteria; Actinobacteria; Actinobacteria; Actinomycetales; Micromonosporaceae                                   |
| Otu500  | 2       | 19      | 2       | 2        | 12      | 101      | 32        | 24        | 24        | 0         | 21        | 16        | Bacteria; Proteobacteria; Alphaproteobacteria; Ellin329                                                         |
| Otu503  | 0       | 0       | 0       | 2        | 5       | 0        | 0         | 4         | 4         | 0         | 4         | 46        | Bacteria; Proteobacteria; Betaproteobacteria; Procabacteriales; Procabacteriaceae; Leeia; Leeia_oryzae          |
| Otu502  | 7       | 11      | 36      | 33       | 1       | 4        | 7         | 4         | 10        | 0         | 6         | 1         | Bacteria; Planctomycetes; Phycisphaerae; WD2101                                                                 |
| Otu505  | 0       | 0       | 12      | 1        | 8       | 1        | 0         | 0         | 0         | 25        | 0         | 13        | Bacteria; Proteobacteria; Gammaproteobacteria; Legionellales; Coxiellaceae; Rickettsiella                       |
| Otu504  | 0       | 0       | 0       | 0        | 10      | 30       | 0         | 0         | 0         | 0         | 0         | 0         | Bacteria; Chloroflexi; Anaerolineae; SBR1031; oc28                                                              |
| Otu507  | 25      | 68      | 17      | 33       | 26      | 19       | 28        | 15        | 7         | 24        | 39        | 10        | Bacteria; Acidobacteria; Acidobacteria-6; iii1-15                                                               |
| Otu506  | 4       | 1       | 6       | 5        | 9       | 32       | 3         | 19        | 19        | 19        | 5         | 1         | Bacteria; Acidobacteria; Sva0725; Sva0725                                                                       |
| Otu509  | 16      | 56      | 24      | 30       | 40      | 26       | 18        | 5         | 11        | 37        | 30        | 4         | Bacteria; Acidobacteria; Chloracidobacteria; PK29                                                               |
| Otu508  | 10      | 33      | 1       | 10       | 6       | 0        | 2         | 1         | 13        | 2         | 59        | 0         | Bacteria; Bacteroidetes; Flavobacteriia; Flavobacteriales; Flavobacteriaceae; Flavobacterium                    |
| Otu1068 | 0       | 0       | 0       | 0        | 0       | 0        | 0         | 0         | 11        | 0         | 1         | 1         | Bacteria                                                                                                        |
| Otu1069 | 3       | 4       | 3       | 12       | 5       | 11       | 6         | 7         | 5         | 9         | 4         | 5         | Bacteria; Chloroflexi; TK10; B07_WMSP1                                                                          |
| Otu1060 | 4       | 2       | 2       | 1        | 8       | 13       | 9         | 9         | 9         | 6         | 9         | 7         | Bacteria; Proteobacteria; Deltaproteobacteria; Syntrophobacteriales; Syntrophobacteraceae                       |
| Otu1061 | 20      | 18      | 11      | 25       | 2       | 16       | 12        | 64        | 39        | 10        | 15        | 6         | Bacteria; TM7; TM7-1                                                                                            |

| #OTU ID | Z31DRh1 | Z31DRh2 | Z31DRh3 | Z31DRh4r | Z31DRh5 | Z31DRh6r | Z31J1DRh1 | Z31J1DRh2 | Z31J1DRh3 | Z31J1DRh4 | Z31J1DRh5 | Z31J1DRh6 | taxonomy                                                                                         |
|---------|---------|---------|---------|----------|---------|----------|-----------|-----------|-----------|-----------|-----------|-----------|--------------------------------------------------------------------------------------------------|
| Otu1062 | 0       | 18      | 3       | 16       | 11      | 1        | 6         | 0         | 0         | 1         | 3         | 1         | Bacteria; Acidobacteria; Chloracidobacteria; 11-24                                               |
| Otu1063 | 0       | 0       | 4       | 0        | 0       | 4        | 0         | 2         | 0         | 0         | 10        | 1         | Bacteria; Chlamydiae; Chlamydia; Chlamydiales                                                    |
| Otu1064 | 4       | 3       | 2       | 5        | 0       | 8        | 3         | 10        | 12        | 2         | 4         | 3         | Bacteria; Acidobacteria; Acidobacteria-6; iii1-15                                                |
| Otu1065 | 6       | 0       | 2       | 11       | 1       | 1        | 1         | 3         | 3         | 0         | 6         | 2         | Bacteria; Planctomycetes; Planctomycetia; Gemmatales; Gemmataceae; Gemmata                       |
| Otu1066 | 1       | 1       | 0       | 12       | 2       | 2        | 9         | 2         | 4         | 3         | 1         | 1         | Bacteria; Chloroflexi; Ktedonobacteria; JG30-KF-AS9                                              |
| Otu1067 | 1       | 1       | 0       | 8        | 0       | 0        | 0         | 0         | 0         | 0         | 0         | 1         | Bacteria; Proteobacteria; Alphaproteobacteria; Caulobacteriales; Caulobacteraceae; Asticcacaulis |
| Otu729  | 0       | 3       | 1       | 1        | 14      | 40       | 6         | 31        | 7         | 3         | 11        | 3         | Bacteria; Acidobacteria; Solibacteres; Solibacterales                                            |
| Otu728  | 3       | 6       | 13      | 23       | 7       | 23       | 10        | 11        | 9         | 3         | 9         | 7         | Bacteria; Chloroflexi; C0119                                                                     |
| Otu721  | 8       | 6       | 1       | 14       | 2       | 3        | 3         | 13        | 1         | 2         | 0         | 1         | Bacteria; TM6; SJA-4                                                                             |
| Otu720  | 0       | 7       | 4       | 17       | 9       | 3        | 7         | 3         | 11        | 3         | 3         | 6         | Bacteria; Bacteroidetes                                                                          |
| Otu723  | 13      | 6       | 4       | 19       | 9       | 15       | 7         | 11        | 14        | 4         | 8         | 9         | Bacteria; TM7; SC3                                                                               |
| Otu722  | 7       | 11      | 7       | 10       | 5       | 22       | 10        | 18        | 3         | 4         | 6         | 1         | Bacteria; Cyanobacteria; Chloroplast; Chlorophyta                                                |
| Otu725  | 0       | 6       | 2       | 7        | 2       | 19       | 5         | 4         | 7         | 7         | 6         | 2         | Bacteria; Armatimonadetes; Fimbriimonadia; Fimbriimonadales; Fimbriimonadaceae; Fimbriimonas     |
| Otu724  | 1       | 16      | 0       | 0        | 0       | 0        | 0         | 0         | 0         | 0         | 0         | 0         | Bacteria; Proteobacteria; Gammaproteobacteria; Legionellales; Coxiellaceae                       |
| Otu727  | 12      | 4       | 5       | 17       | 6       | 25       | 8         | 31        | 7         | 8         | 9         | 1         | Bacteria; Proteobacteria; Gammaproteobacteria; Legionellales; Coxiellaceae                       |
| Otu726  | 18      | 0       | 4       | 7        | 4       | 27       | 1         | 9         | 6         | 6         | 2         | 3         | Bacteria; Armatimonadetes; Fimbriimonadia; Fimbriimonadales; Fimbriimonadaceae; Fimbriimonas     |
| Otu4278 | 0       | 2       | 0       | 0        | 0       | 0        | 0         | 0         | 0         | 0         | 0         | 0         | Bacteria; Acidobacteria; Acidobacteria-6; iii1-15; mb2424                                        |
| Otu3639 | 2       | 0       | 0       | 0        | 0       | 0        | 0         | 0         | 0         | 0         | 0         | 0         | Bacteria; Proteobacteria; Deltaproteobacteria; Myxococcales                                      |
| Otu3638 | 0       | 0       | 0       | 0        | 0       | 2        | 0         | 0         | 3         | 0         | 0         | 0         | Bacteria; Proteobacteria; TA18; PHOS-HD29                                                        |
| Otu3633 | 0       | 0       | 0       | 0        | 0       | 1        | 0         | 0         | 0         | 2         | 1         | 0         | Bacteria; Proteobacteria; Gammaproteobacteria                                                    |
| Otu3632 | 3       | 2       | 5       | 7        | 3       | 2        | 13        | 7         | 5         | 10        | 9         | 2         | Bacteria; Gemmatimonadetes; Gemmatimonadetes                                                     |
| Otu3631 | 3       | 0       | 0       | 0        | 0       | 0        | 0         | 0         | 0         | 0         | 0         | 0         | Bacteria; Firmicutes; Bacilli; Bacillales; Paenibacillaceae; Paenibacillus                       |

| #OTU ID | Z31DRh1 | Z31DRh2 | Z31DRh3 | Z31DRh4r | Z31DRh5 | Z31DRh6r | Z31J1DRh1 | Z31J1DRh2 | Z31J1DRh3 | Z31J1DRh4 | Z31J1DRh5 | Z31J1DRh6 | taxonomy                                                                                            |
|---------|---------|---------|---------|----------|---------|----------|-----------|-----------|-----------|-----------|-----------|-----------|-----------------------------------------------------------------------------------------------------|
| Otu3630 | 0       | 0       | 2       | 0        | 0       | 0        | 0         | 0         | 0         | 0         | 0         | 0         | Bacteria; Proteobacteria                                                                            |
| Otu3637 | 0       | 0       | 0       | 0        | 1       | 0        | 0         | 1         | 2         | 0         | 0         | 0         | Bacteria; TM6; SJA-4                                                                                |
| Otu3636 | 3       | 0       | 0       | 0        | 0       | 0        | 0         | 0         | 0         | 0         | 0         | 0         | Bacteria; Verrucomicrobia; Verrucomicrobiae; Verrucomicrobiales; Verrucomicrobiaceae                |
| Otu3635 | 0       | 0       | 0       | 0        | 0       | 0        | 1         | 2         | 0         | 0         | 2         | 0         | Bacteria; Gemmatimonadetes; Gemmatimonadetes; Gemmatimonadales; Ellin5301                           |
| Otu3634 | 1       | 4       | 4       | 3        | 1       | 5        | 2         | 0         | 1         | 2         | 2         | 1         | Bacteria; Planctomycetes; Phycisphaerae; WD2101                                                     |
| Otu1114 | 1       | 3       | 0       | 6        | 9       | 9        | 3         | 8         | 4         | 4         | 4         | 2         | Bacteria; Bacteroidetes; Sphingobacteriia; Sphingobacteriales                                       |
| Otu1115 | 0       | 0       | 0       | 0        | 0       | 16       | 7         | 0         | 2         | 0         | 0         | 2         | Bacteria; Proteobacteria; Betaproteobacteria; Neisseriales; Neisseriaceae                           |
| Otu1116 | 0       | 0       | 1       | 3        | 0       | 0        | 0         | 0         | 0         | 10        | 1         | 0         | Bacteria; Bacteroidetes; Saprospirae; Saprospirales; Chitinophagaceae                               |
| Otu1117 | 3       | 0       | 3       | 3        | 1       | 4        | 0         | 8         | 10        | 2         | 4         | 1         | Bacteria; Proteobacteria; Alphaproteobacteria; Rhodospirillales; Rhodospirillaceae                  |
| Otu1110 | 1       | 3       | 2       | 2        | 0       | 4        | 10        | 5         | 3         | 1         | 2         | 1         | Bacteria; Proteobacteria; Alphaproteobacteria; Ellin329                                             |
| Otu1111 | 12      | 1       | 3       | 11       | 1       | 6        | 3         | 2         | 2         | 4         | 0         | 0         | Bacteria; Cyanobacteria; 4C0d-2; MLE1-12                                                            |
| Otu1112 | 5       | 2       | 1       | 6        | 4       | 19       | 3         | 2         | 2         | 0         | 1         | 3         | Bacteria; Proteobacteria; Gammaproteobacteria; Xanthomonadales; Xanthomonadaceae; Lysobacter        |
| Otu1113 | 13      | 16      | 8       | 4        | 6       | 10       | 14        | 1         | 3         | 11        | 18        | 3         | Bacteria; Proteobacteria; Deltaproteobacteria; Syntrophobacteriales; Syntrophobacteraceae           |
| Otu435  | 31      | 69      | 13      | 19       | 19      | 11       | 35        | 30        | 11        | 57        | 25        | 10        | Bacteria; Bacteroidetes; Saprospirae; Saprospirales; Chitinophagaceae                               |
| Otu434  | 4       | 6       | 3       | 16       | 1       | 30       | 5         | 1         | 0         | 2         | 6         | 1         | Bacteria; Proteobacteria; Alphaproteobacteria; Rickettsiales; mitochondria; Lupinus; Lupinus_luteus |
| Otu437  | 15      | 56      | 34      | 43       | 10      | 21       | 20        | 6         | 13        | 21        | 46        | 3         | Bacteria; Planctomycetes; Phycisphaerae; WD2101                                                     |
| Otu436  | 1       | 2       | 5       | 8        | 32      | 4        | 0         | 6         | 3         | 19        | 11        | 11        | Bacteria; Gemmatimonadetes; Gemmatimonadetes                                                        |
| Otu431  | 24      | 19      | 17      | 18       | 23      | 27       | 56        | 44        | 55        | 56        | 24        | 19        | Bacteria; Gemmatimonadetes; Gemmatimonadetes                                                        |
| Otu430  | 14      | 27      | 13      | 45       | 13      | 34       | 19        | 5         | 18        | 22        | 33        | 15        | Bacteria; Nitrospirae; Nitrospira; Nitrospirales; Nitrospiraceae; Nitrospira                        |
| Otu433  | 15      | 14      | 14      | 41       | 2       | 9        | 11        | 14        | 7         | 9         | 8         | 17        | Bacteria; Proteobacteria; Alphaproteobacteria; Rhodospirillales; Rhodospirillaceae                  |
| Otu432  | 3       | 1       | 1       | 4        | 0       | 9        | 0         | 0         | 33        | 0         | 5         | 0         | Bacteria; Proteobacteria                                                                            |
| Otu655  | 0       | 1       | 0       | 0        | 0       | 22       | 0         | 1         | 13        | 0         | 2         | 0         | Bacteria; Chlorobi                                                                                  |



| #OTU ID | Z31DRh1 | Z31DRh2 | Z31DRh3 | Z31DRh4r | Z31DRh5 | Z31DRh6r | Z31J1DRh1 | Z31J1DRh2 | Z31J1DRh3 | Z31J1DRh4 | Z31J1DRh5 | Z31J1DRh6 | taxonomy                                                                                                  |
|---------|---------|---------|---------|----------|---------|----------|-----------|-----------|-----------|-----------|-----------|-----------|-----------------------------------------------------------------------------------------------------------|
| Otu654  | 11      | 5       | 12      | 16       | 15      | 37       | 16        | 31        | 11        | 19        | 7         | 17        | Bacteria; Proteobacteria; Alphaproteobacteria; Rhodospirillales; Rhodospirillaceae                        |
| Otu657  | 6       | 1       | 1       | 4        | 1       | 11       | 4         | 9         | 21        | 1         | 0         | 13        | Bacteria; Proteobacteria; Alphaproteobacteria; Rhodospirillales; Acetobacteraceae                         |
| Otu656  | 4       | 4       | 2       | 24       | 2       | 4        | 3         | 4         | 2         | 0         | 0         | 0         | Bacteria; Bacteroidetes; Saprospirae; Saprospirales; Chitinophagaceae                                     |
| Otu651  | 8       | 0       | 3       | 3        | 4       | 22       | 3         | 0         | 5         | 3         | 2         | 7         | Bacteria; Bacteroidetes; Saprospirae; Saprospirales; Chitinophagaceae                                     |
| Otu650  | 2       | 3       | 8       | 7        | 11      | 24       | 7         | 20        | 18        | 18        | 9         | 2         | Bacteria; Chloroflexi; Anaerolineae; SBR1031; oc28                                                        |
| Otu653  | 8       | 0       | 5       | 2        | 1       | 41       | 0         | 2         | 8         | 3         | 2         | 5         | Bacteria; Verrucomicrobia; Opitutae; Opitiales; Opitutaceae; Opitutus                                     |
| Otu652  | 20      | 2       | 14      | 19       | 3       | 19       | 9         | 10        | 2         | 11        | 4         | 1         | Bacteria; Armatimonadetes; Armatimonadia; Armatimonadales; Armatimonadaceae                               |
| Otu659  | 0       | 11      | 32      | 32       | 4       | 7        | 4         | 13        | 11        | 12        | 18        | 11        | Bacteria; Bacteroidetes; Sphingobacteria; Sphingobacteriales                                              |
| Otu658  | 9       | 15      | 11      | 28       | 14      | 36       | 11        | 26        | 12        | 13        | 34        | 9         | Bacteria; Chloroflexi; TK10; B07_WMSP1                                                                    |
| Otu3659 | 0       | 0       | 0       | 0        | 1       | 2        | 0         | 0         | 0         | 0         | 0         | 0         | Bacteria; Chloroflexi; Anaerolineae; SBR1031; oc28                                                        |
| Otu3870 | 22      | 15      | 21      | 30       | 14      | 33       | 21        | 29        | 22        | 24        | 37        | 11        | Bacteria; Acidobacteria; Solibacteres; Solibacterales; Solibacteraceae; Candidatus_Solibacter             |
| Otu448  | 1       | 15      | 5       | 32       | 0       | 34       | 9         | 1         | 0         | 4         | 10        | 4         | Bacteria; Verrucomicrobia; Pedosphaerae; Pedosphaerales; auto67_4W                                        |
| Otu449  | 16      | 37      | 21      | 35       | 24      | 116      | 24        | 28        | 16        | 44        | 62        | 21        | Bacteria; Acidobacteria; Solibacteres; Solibacterales; Solibacteraceae; Candidatus_Solibacter             |
| Otu3747 | 0       | 0       | 0       | 0        | 0       | 0        | 0         | 0         | 0         | 0         | 0         | 2         | Bacteria                                                                                                  |
| Otu1510 | 8       | 4       | 2       | 7        | 3       | 18       | 2         | 2         | 0         | 1         | 1         | 0         | Bacteria; Planctomycetes; Planctomycetia; Gemmatales; Gemmataceae; Gemmata                                |
| Otu3745 | 0       | 0       | 0       | 0        | 0       | 2        | 1         | 0         | 0         | 2         | 0         | 1         | Bacteria                                                                                                  |
| Otu3744 | 2       | 0       | 0       | 0        | 0       | 0        | 0         | 0         | 0         | 0         | 0         | 0         | Bacteria; Proteobacteria; Gammaproteobacteria; Legionellales; Coxiellaceae                                |
| Otu3743 | 0       | 0       | 0       | 2        | 0       | 0        | 0         | 0         | 2         | 0         | 4         | 0         | Bacteria; Proteobacteria; Deltaproteobacteria; Myxococcales                                               |
| Otu3742 | 0       | 0       | 0       | 0        | 0       | 0        | 0         | 0         | 0         | 2         | 0         | 0         | Bacteria; Actinobacteria; Actinobacteria; Actinomycetales                                                 |
| Otu2698 | 0       | 0       | 0       | 0        | 0       | 0        | 3         | 1         | 2         | 1         | 0         | 0         | Bacteria; Proteobacteria; Gammaproteobacteria; Legionellales; Coxiellaceae                                |
| Otu1511 | 0       | 5       | 1       | 0        | 0       | 0        | 0         | 0         | 0         | 0         | 0         | 0         | Bacteria; Proteobacteria; Gammaproteobacteria                                                             |
| Otu2696 | 0       | 1       | 2       | 0        | 0       | 3        | 0         | 2         | 0         | 0         | 1         | 0         | Bacteria; Proteobacteria; Betaproteobacteria; Burkholderiales; Burkholderiaceae; Candidatus_Glomeribacter |

| #OTU ID | Z31DRh1 | Z31DRh2 | Z31DRh3 | Z31DRh4r | Z31DRh5 | Z31DRh6r | Z31J1DRh1 | Z31J1DRh2 | Z31J1DRh3 | Z31J1DRh4 | Z31J1DRh5 | Z31J1DRh6 | taxonomy                                                                                                           |
|---------|---------|---------|---------|----------|---------|----------|-----------|-----------|-----------|-----------|-----------|-----------|--------------------------------------------------------------------------------------------------------------------|
| Otu2697 | 0       | 0       | 1       | 1        | 0       | 1        | 1         | 0         | 2         | 1         | 0         | 0         | Bacteria; Actinobacteria; Thermoleophila; Gaiellales; Gaiellaceae                                                  |
| Otu2694 | 0       | 0       | 0       | 0        | 0       | 0        | 0         | 4         | 0         | 0         | 0         | 0         | Bacteria; Proteobacteria; Gammaproteobacteria; Legionellales; Coxiellaceae                                         |
| Otu2695 | 2       | 3       | 0       | 0        | 0       | 0        | 0         | 0         | 0         | 0         | 0         | 0         | Bacteria; Proteobacteria; Alphaproteobacteria; BD7-3                                                               |
| Otu2692 | 2       | 2       | 0       | 1        | 1       | 4        | 1         | 1         | 0         | 0         | 2         | 1         | Bacteria; Acidobacteria; iii1-8; SJA-36                                                                            |
| Otu1512 | 0       | 0       | 0       | 0        | 0       | 0        | 0         | 0         | 0         | 5         | 0         | 2         | Bacteria; Proteobacteria; Alphaproteobacteria                                                                      |
| Otu2690 | 6       | 18      | 3       | 14       | 3       | 2        | 7         | 1         | 0         | 3         | 8         | 2         | Bacteria; Acidobacteria; Chloracidobacteria; DS-100                                                                |
| Otu2691 | 0       | 0       | 0       | 0        | 0       | 0        | 0         | 0         | 0         | 2         | 0         | 0         | Bacteria; Chlamydiae; Chlamydia; Chlamydiales                                                                      |
| Otu237  | 26      | 32      | 16      | 55       | 20      | 104      | 21        | 26        | 20        | 19        | 22        | 10        | Bacteria; Chloroflexi; Anaerolineae; SBR1031; A4b                                                                  |
| Otu235  | 42      | 167     | 41      | 66       | 37      | 38       | 40        | 16        | 17        | 33        | 82        | 11        | Bacteria; Acidobacteria; Chloracidobacteria; 11-24                                                                 |
| Otu234  | 40      | 26      | 11      | 34       | 56      | 115      | 45        | 5         | 69        | 97        | 83        | 25        | Bacteria; Proteobacteria; Alphaproteobacteria; Sphingomonadales; Sphingomonadaceae                                 |
| Otu233  | 36      | 35      | 65      | 65       | 13      | 98       | 21        | 47        | 117       | 8         | 27        | 68        | Bacteria; Bacteroidetes; Saprospirae; Saprospirales; Chitinophagaceae                                              |
| Otu232  | 20      | 26      | 43      | 42       | 34      | 76       | 62        | 90        | 61        | 91        | 58        | 39        | Bacteria; Gemmatimonadetes; Gemmatimonadetes                                                                       |
| Otu231  | 14      | 76      | 34      | 15       | 89      | 21       | 14        | 3         | 1         | 26        | 22        | 6         | Bacteria; WS3; PRR-12; Sediment-1; PRR-10                                                                          |
| Otu230  | 2       | 12      | 46      | 9        | 1       | 91       | 0         | 1         | 0         | 0         | 3         | 1         | Bacteria; Bacteroidetes; Sphingobacteria; Sphingobacteriales; Sphingobacteriaceae; Solitalea; Solitalea_canadensis |
| Otu1514 | 248     | 93      | 63      | 150      | 67      | 380      | 126       | 230       | 307       | 110       | 146       | 92        | Bacteria; Bacteroidetes; Cytophagia; Cytophagales; Cytophagaceae                                                   |
| Otu3627 | 0       | 2       | 0       | 1        | 1       | 0        | 0         | 0         | 0         | 0         | 2         | 0         | Bacteria; Actinobacteria; Thermoleophila; Gaiellales; Gaiellaceae                                                  |
| Otu4384 | 0       | 0       | 0       | 2        | 0       | 0        | 0         | 0         | 0         | 0         | 0         | 0         | Bacteria; OD1; ZB2                                                                                                 |
| Otu239  | 82      | 49      | 117     | 424      | 95      | 234      | 222       | 139       | 232       | 489       | 41        | 195       | Bacteria; Proteobacteria; Betaproteobacteria; Burkholderiales; Oxalobacteraceae                                    |
| Otu238  | 33      | 23      | 32      | 15       | 19      | 62       | 6         | 7         | 4         | 11        | 75        | 32        | Bacteria; Bacteroidetes; Sphingobacteria; Sphingobacteriales                                                       |
| Otu1806 | 0       | 4       | 2       | 0        | 1       | 1        | 3         | 0         | 4         | 0         | 0         | 0         | Bacteria; Acidobacteria; iii1-8; 32-20                                                                             |
| Otu1807 | 5       | 1       | 0       | 0        | 0       | 0        | 0         | 0         | 0         | 0         | 0         | 2         | Bacteria; Proteobacteria; Gammaproteobacteria; Legionellales; Legionellaceae                                       |
| Otu1804 | 1       | 8       | 1       | 9        | 19      | 17       | 10        | 4         | 5         | 6         | 13        | 3         | Bacteria; Verrucomicrobia; Pedosphaerae; Pedosphaerales                                                            |

| #OTU ID | Z31DRh1 | Z31DRh2 | Z31DRh3 | Z31DRh4r | Z31DRh5 | Z31DRh6r | Z31J1DRh1 | Z31J1DRh2 | Z31J1DRh3 | Z31J1DRh4 | Z31J1DRh5 | Z31J1DRh6 | taxonomy                                                                                            |
|---------|---------|---------|---------|----------|---------|----------|-----------|-----------|-----------|-----------|-----------|-----------|-----------------------------------------------------------------------------------------------------|
| Otu1805 | 0       | 0       | 4       | 9        | 2       | 6        | 1         | 0         | 1         | 2         | 2         | 1         | Bacteria; Proteobacteria; Alphaproteobacteria; Sphingomonadales; Sphingomonadaceae; Novosphingobium |
| Otu1802 | 0       | 0       | 3       | 4        | 1       | 5        | 5         | 2         | 1         | 2         | 0         | 0         | Bacteria; Firmicutes; Bacilli; Bacillales; Paenibacillaceae; Brevibacillus                          |
| Otu1516 | 0       | 2       | 0       | 5        | 0       | 3        | 5         | 1         | 2         | 2         | 5         | 0         | Bacteria; Proteobacteria; Alphaproteobacteria                                                       |
| Otu1800 | 1       | 0       | 0       | 1        | 0       | 0        | 1         | 6         | 6         | 0         | 1         | 0         | Bacteria; Proteobacteria; Alphaproteobacteria                                                       |
| Otu1801 | 1       | 5       | 0       | 1        | 3       | 0        | 0         | 1         | 2         | 0         | 1         | 4         | Bacteria; Chloroflexi; Anaerolineae; GCA004                                                         |
| Otu440  | 15      | 1       | 3       | 14       | 0       | 39       | 3         | 5         | 5         | 3         | 5         | 8         | Bacteria; Proteobacteria; Alphaproteobacteria; Rhodospirillales; Rhodospirillaceae                  |
| Otu1638 | 0       | 0       | 1       | 1        | 1       | 2        | 1         | 1         | 4         | 1         | 5         | 3         | Bacteria; Proteobacteria                                                                            |
| Otu1517 | 1       | 8       | 6       | 3        | 1       | 2        | 7         | 12        | 9         | 0         | 3         | 1         | Bacteria; Elusimicrobia; Elusimicrobia; FAC88                                                       |
| Otu1808 | 8       | 5       | 0       | 2        | 3       | 2        | 3         | 2         | 0         | 0         | 1         | 3         | Bacteria; Bacteroidetes; Cytophagia; Cytophagales; Cytophagaceae                                    |
| Otu441  | 559     | 486     | 500     | 1090     | 664     | 887      | 437       | 305       | 486       | 709       | 492       | 713       | Bacteria; Proteobacteria; Betaproteobacteria; Burkholderiales; Comamonadaceae; Methylibium          |
| Otu1518 | 0       | 0       | 0       | 0        | 1       | 1        | 0         | 1         | 0         | 6         | 0         | 3         | Bacteria; TM6; SBRH58                                                                               |
| Otu3248 | 0       | 1       | 13      | 80       | 15      | 3        | 1         | 0         | 20        | 2         | 1         | 6         | Bacteria; Proteobacteria; Alphaproteobacteria; Sphingomonadales; Sphingomonadaceae; Novosphingobium |
| Otu3249 | 0       | 1       | 0       | 2        | 0       | 1        | 1         | 4         | 2         | 0         | 0         | 0         | Bacteria; Chloroflexi; Thermomicrobia; JG30-KF-CM45                                                 |
| Otu4380 | 0       | 0       | 0       | 0        | 0       | 0        | 0         | 2         | 2         | 0         | 0         | 0         | Bacteria; Chlamydiae; Chlamydia; Chlamydiales                                                       |
| Otu1519 | 0       | 2       | 2       | 1        | 0       | 0        | 3         | 5         | 2         | 1         | 0         | 0         | Bacteria; Proteobacteria; Gammaproteobacteria; Legionellales; Coxiellaceae; Aquicella               |
| Otu3242 | 0       | 0       | 0       | 0        | 0       | 0        | 0         | 0         | 0         | 0         | 3         | 0         | Bacteria                                                                                            |
| Otu3243 | 1       | 0       | 4       | 0        | 0       | 1        | 0         | 0         | 0         | 0         | 1         | 0         | Bacteria; Acidobacteria; Solibacteres; Solibacterales; AKIW659                                      |
| Otu3240 | 0       | 1       | 0       | 0        | 0       | 0        | 0         | 0         | 0         | 0         | 2         | 0         | Bacteria; OP3; PBS-25                                                                               |
| Otu3241 | 2       | 0       | 2       | 0        | 0       | 0        | 0         | 0         | 0         | 0         | 0         | 0         | Bacteria; Proteobacteria; Deltaproteobacteria; Spirobacillales                                      |
| Otu3246 | 0       | 0       | 0       | 0        | 0       | 0        | 0         | 0         | 0         | 2         | 0         | 0         | Bacteria; Firmicutes; Bacilli; Bacillales; Paenibacillaceae; Paenibacillus                          |
| Otu3247 | 0       | 2       | 0       | 0        | 0       | 2        | 0         | 0         | 0         | 0         | 0         | 0         | Bacteria; Tenericutes; Mollicutes; Anaeroplasmatales; Anaeroplasmataceae; Asteroleplasma            |
| Otu3244 | 0       | 1       | 0       | 2        | 1       | 2        | 18        | 31        | 7         | 1         | 1         | 4         | Bacteria; Bacteroidetes; Cytophagia; Cytophagales; Cytophagaceae                                    |

| #OTU ID | Z31DRh1 | Z31DRh2 | Z31DRh3 | Z31DRh4r | Z31DRh5 | Z31DRh6r | Z31J1DRh1 | Z31J1DRh2 | Z31J1DRh3 | Z31J1DRh4 | Z31J1DRh5 | Z31J1DRh6 | taxonomy                                                                                        |
|---------|---------|---------|---------|----------|---------|----------|-----------|-----------|-----------|-----------|-----------|-----------|-------------------------------------------------------------------------------------------------|
| Otu3245 | 0       | 0       | 1       | 0        | 0       | 2        | 0         | 1         | 1         | 0         | 0         | 0         | Bacteria; WPS-2                                                                                 |
| Otu2348 | 3       | 0       | 4       | 3        | 1       | 6        | 3         | 3         | 3         | 1         | 6         | 1         | Bacteria; TM7; TM7-1                                                                            |
| Otu2349 | 1       | 0       | 1       | 1        | 2       | 5        | 1         | 2         | 1         | 3         | 3         | 0         | Bacteria; Proteobacteria; Deltaproteobacteria; Myxococcales                                     |
| Otu2340 | 3       | 3       | 0       | 1        | 2       | 4        | 1         | 3         | 0         | 0         | 1         | 0         | Bacteria; Armatimonadetes; Fimbriimonadia; Fimbriimonadales;<br>Fimbriimonadaceae               |
| Otu2341 | 2       | 4       | 3       | 4        | 1       | 2        | 2         | 4         | 1         | 2         | 5         | 0         | Bacteria; Gemmatimonadetes; Gemm-5                                                              |
| Otu2342 | 1       | 0       | 0       | 0        | 0       | 4        | 0         | 0         | 0         | 0         | 0         | 0         | Bacteria; Bacteroidetes; Cytophagia; Cytophagales; Amoebophilaceae;<br>Candidatus_Amoebophilus  |
| Otu2343 | 0       | 0       | 1       | 4        | 0       | 2        | 0         | 0         | 0         | 2         | 1         | 0         | Bacteria; Armatimonadetes; Armatimonadia; FW68                                                  |
| Otu2344 | 0       | 0       | 0       | 0        | 0       | 4        | 0         | 0         | 0         | 0         | 0         | 0         | Bacteria; Proteobacteria; Deltaproteobacteria; MIZ46                                            |
| Otu2345 | 0       | 1       | 0       | 3        | 1       | 0        | 2         | 0         | 0         | 0         | 2         | 0         | Bacteria; Verrucomicrobia; Pedosphaerae; Pedosphaerales                                         |
| Otu2346 | 0       | 0       | 0       | 0        | 0       | 0        | 0         | 0         | 5         | 0         | 0         | 0         | Bacteria; Bacteroidetes; Flavobacteriia; Flavobacteriales; Flavobacteriaceae;<br>Flavobacterium |
| Otu2347 | 1       | 9       | 2       | 8        | 1       | 2        | 4         | 3         | 14        | 1         | 7         | 0         | Bacteria; Proteobacteria; Gammaproteobacteria; Legionellales; Coxiellaceae;<br>Aquicella        |
| Otu4221 | 0       | 1       | 0       | 0        | 0       | 0        | 0         | 0         | 2         | 0         | 0         | 0         | Bacteria; OD1; ZB2                                                                              |
| Otu4150 | 0       | 0       | 0       | 0        | 0       | 1        | 0         | 4         | 0         | 0         | 0         | 0         | Bacteria; Chlamydiae; Chlamydiia; Chlamydiales                                                  |
| Otu3336 | 0       | 0       | 0       | 1        | 1       | 3        | 3         | 1         | 1         | 3         | 1         | 3         | Bacteria; Proteobacteria; Alphaproteobacteria; Rickettsiales                                    |
| Otu3192 | 0       | 0       | 0       | 2        | 0       | 2        | 0         | 1         | 1         | 0         | 1         | 0         | Bacteria; Planctomycetes; Planctomycetia; Gemmatales; Gemmataceae                               |
| Otu3334 | 0       | 1       | 1       | 9        | 0       | 7        | 3         | 0         | 0         | 0         | 4         | 0         | Bacteria; Acidobacteria; Chloracidobacteria; 11-24                                              |
| Otu3335 | 0       | 2       | 0       | 0        | 0       | 3        | 0         | 3         | 0         | 0         | 0         | 0         | Bacteria                                                                                        |
| Otu2209 | 2       | 3       | 0       | 0        | 3       | 0        | 0         | 0         | 0         | 0         | 0         | 0         | Bacteria; Acidobacteria; Acidobacteria-6; CCU21                                                 |
| Otu2208 | 1       | 0       | 0       | 3        | 0       | 0        | 2         | 1         | 0         | 1         | 3         | 1         | Bacteria; Planctomycetes; Planctomycetia; Gemmatales; Isosphaeraceae                            |
| Otu3330 | 0       | 4       | 1       | 3        | 0       | 0        | 2         | 0         | 0         | 0         | 2         | 1         | Bacteria; Actinobacteria; Acidimicrobiia; Acidimicrobiales                                      |
| Otu3331 | 0       | 1       | 0       | 2        | 0       | 0        | 0         | 0         | 0         | 0         | 2         | 0         | Bacteria; Chlorobi; BSV26; PK329                                                                |
| Otu2205 | 1       | 3       | 1       | 0        | 1       | 5        | 0         | 1         | 1         | 0         | 1         | 0         | Bacteria; Proteobacteria; Deltaproteobacteria; Myxococcales;<br>Myxococcaceae; Anaeromyxobacter |

| #OTU ID | Z31DRh1 | Z31DRh2 | Z31DRh3 | Z31DRh4r | Z31DRh5 | Z31DRh6r | Z31J1DRh1 | Z31J1DRh2 | Z31J1DRh3 | Z31J1DRh4 | Z31J1DRh5 | Z31J1DRh6 | taxonomy                                                                                         |
|---------|---------|---------|---------|----------|---------|----------|-----------|-----------|-----------|-----------|-----------|-----------|--------------------------------------------------------------------------------------------------|
| Otu2204 | 0       | 3       | 0       | 1        | 3       | 1        | 3         | 0         | 0         | 1         | 2         | 0         | Bacteria; Chlamydiae; Chlamydia; Chlamydiales; Parachlamydiaceae                                 |
| Otu2207 | 3       | 1       | 0       | 0        | 0       | 0        | 1         | 0         | 2         | 0         | 0         | 0         | Bacteria                                                                                         |
| Otu2206 | 1       | 4       | 1       | 2        | 0       | 3        | 1         | 0         | 0         | 1         | 2         | 0         | Bacteria                                                                                         |
| Otu2201 | 12      | 3       | 9       | 27       | 0       | 10       | 7         | 21        | 8         | 2         | 1         | 8         | Bacteria; Bacteroidetes; Saprospirae; Saprospirales; Chitinophagaceae                            |
| Otu2200 | 0       | 0       | 0       | 0        | 0       | 3        | 0         | 0         | 1         | 1         | 2         | 0         | Bacteria; Planctomycetes; Planctomycetia; Gemmatales; Gemmataceae                                |
| Otu2203 | 1       | 0       | 1       | 2        | 1       | 4        | 0         | 0         | 0         | 1         | 0         | 0         | Bacteria; Cyanobacteria; Chloroplast; Chlorophyta; Chlamydomonadaceae                            |
| Otu2202 | 0       | 0       | 4       | 0        | 0       | 0        | 0         | 0         | 0         | 0         | 0         | 0         | Bacteria; Chloroflexi; Anaerolineae; SBR1031; A4b                                                |
| Otu3337 | 0       | 0       | 0       | 0        | 0       | 0        | 0         | 0         | 0         | 2         | 0         | 0         | Bacteria; Proteobacteria; Gammaproteobacteria; Legionellales                                     |
| Otu3193 | 0       | 0       | 0       | 0        | 2       | 2        | 0         | 0         | 0         | 0         | 0         | 0         | Bacteria; Proteobacteria; Alphaproteobacteria                                                    |
| Otu3332 | 0       | 3       | 0       | 1        | 0       | 0        | 0         | 0         | 0         | 0         | 0         | 0         | Bacteria; Actinobacteria; Acidimicrobia; Acidimicrobiales; AKIW874                               |
| Otu1558 | 4       | 5       | 4       | 11       | 0       | 9        | 5         | 1         | 13        | 6         | 6         | 6         | Bacteria; Proteobacteria; Gammaproteobacteria; Legionellales; Coxiellaceae                       |
| Otu3333 | 0       | 0       | 0       | 0        | 0       | 0        | 0         | 2         | 0         | 0         | 0         | 0         | Bacteria; Proteobacteria                                                                         |
| Otu1452 | 0       | 0       | 0       | 1        | 0       | 1        | 1         | 0         | 0         | 0         | 0         | 5         | Bacteria; Proteobacteria; Gammaproteobacteria; Legionellales; Coxiellaceae                       |
| Otu8    | 426     | 216     | 349     | 1817     | 1090    | 580      | 353       | 274       | 220       | 139       | 197       | 721       | Bacteria; Proteobacteria; Alphaproteobacteria; Rhizobiales; Bradyrhizobiales; Bradyrhizobium     |
| Otu9    | 226     | 412     | 448     | 581      | 549     | 853      | 161       | 134       | 1751      | 36        | 79        | 549       | Bacteria; Actinobacteria; Actinobacteria; Actinomycetales; Streptomycetales; Streptomyces        |
| Otu6    | 449     | 248     | 1082    | 2565     | 1199    | 715      | 2415      | 274       | 506       | 1065      | 188       | 710       | Bacteria; Proteobacteria; Betaproteobacteria; Burkholderiales; Oxalobacteraceae; Ralstonia       |
| Otu4    | 641     | 420     | 1085    | 2898     | 544     | 996      | 541       | 281       | 669       | 692       | 282       | 600       | Bacteria; Proteobacteria; Betaproteobacteria; Burkholderiales; Comamonadaceae                    |
| Otu5    | 1376    | 691     | 1910    | 2238     | 598     | 905      | 1699      | 1618      | 1403      | 1880      | 1295      | 1171      | Bacteria; Proteobacteria; Alphaproteobacteria; Sphingomonadales; Sphingomonadaceae; Kaistobacter |
| Otu2    | 225     | 1       | 1       | 27       | 135     | 5356     | 1         | 2         | 2         | 8         | 1         | 2         | Bacteria; Proteobacteria; Gammaproteobacteria; Enterobacteriales; Enterobacteriaceae; Pantoea    |
| Otu3    | 347     | 47      | 1675    | 3244     | 207     | 94       | 446       | 183       | 186       | 46        | 75        | 5050      | Bacteria; Bacteroidetes; Sphingobacteriia; Sphingobacteriales; Sphingobacteriaceae               |
| Otu4270 | 0       | 1       | 1       | 2        | 0       | 2        | 1         | 1         | 2         | 3         | 0         | 0         | Bacteria; Cyanobacteria; 4C0d-2; MLE1-12                                                         |
| Otu1    | 260     | 66      | 164     | 7327     | 1322    | 308      | 8         | 65        | 170       | 16        | 5         | 310       | Bacteria; Bacteroidetes; Saprospirae; Saprospirales; Chitinophagaceae; Chitinophaga              |

| #OTU ID | Z31DRh1 | Z31DRh2 | Z31DRh3 | Z31DRh4r | Z31DRh5 | Z31DRh6r | Z31J1DRh1 | Z31J1DRh2 | Z31J1DRh3 | Z31J1DRh4 | Z31J1DRh5 | Z31J1DRh6 | taxonomy                                                                                       |
|---------|---------|---------|---------|----------|---------|----------|-----------|-----------|-----------|-----------|-----------|-----------|------------------------------------------------------------------------------------------------|
| Otu2119 | 23      | 21      | 22      | 28       | 18      | 34       | 34        | 29        | 21        | 12        | 23        | 21        | Bacteria; Actinobacteria; Actinobacteria; Actinomycetales; Micromonosporaceae                  |
| Otu2118 | 0       | 0       | 0       | 0        | 1       | 5        | 2         | 2         | 2         | 0         | 2         | 0         | Bacteria; Proteobacteria; Alphaproteobacteria                                                  |
| Otu4312 | 0       | 0       | 0       | 0        | 1       | 0        | 0         | 0         | 0         | 0         | 5         | 0         | Bacteria; Proteobacteria; Betaproteobacteria; MND1                                             |
| Otu1559 | 2       | 2       | 1       | 1        | 1       | 1        | 0         | 0         | 0         | 4         | 9         | 0         | Bacteria; Chloroflexi; Anaerolineae; CFB-26                                                    |
| Otu1668 | 0       | 1       | 0       | 0        | 0       | 0        | 0         | 0         | 0         | 5         | 1         | 0         | Bacteria                                                                                       |
| Otu1669 | 0       | 0       | 0       | 0        | 5       | 1        | 0         | 4         | 1         | 0         | 0         | 1         | Bacteria; Proteobacteria                                                                       |
| Otu1666 | 0       | 0       | 0       | 0        | 0       | 0        | 0         | 4         | 0         | 0         | 2         | 0         | Bacteria; OD1; SM2F11                                                                          |
| Otu1667 | 0       | 3       | 0       | 4        | 0       | 0        | 1         | 0         | 0         | 0         | 0         | 0         | Bacteria; Gemmatimonadetes; Gemm-1                                                             |
| Otu1664 | 0       | 5       | 3       | 0        | 3       | 2        | 1         | 0         | 2         | 3         | 1         | 1         | Bacteria; Armatimonadetes; 0319-6E2                                                            |
| Otu1665 | 0       | 7       | 0       | 0        | 3       | 0        | 2         | 4         | 1         | 1         | 2         | 1         | Bacteria; Gemmatimonadetes; Gemm-1                                                             |
| Otu1662 | 5       | 1       | 10      | 3        | 7       | 6        | 4         | 4         | 7         | 7         | 3         | 3         | Bacteria; Proteobacteria; Gammaproteobacteria; Xanthomonadales; Sinobacteraceae; Nevskia       |
| Otu1663 | 1       | 1       | 3       | 8        | 1       | 2        | 1         | 0         | 0         | 0         | 0         | 0         | Bacteria; Armatimonadetes; Armatimonadia; FW68                                                 |
| Otu1660 | 0       | 0       | 1       | 0        | 0       | 9        | 0         | 0         | 0         | 0         | 1         | 0         | Bacteria; TM7; SC3                                                                             |
| Otu1661 | 0       | 3       | 0       | 0        | 2       | 4        | 1         | 1         | 2         | 1         | 1         | 0         | Bacteria; Chlamydiae; Chlamydia; Chlamydiales                                                  |
| Otu963  | 3       | 14      | 0       | 5        | 4       | 9        | 8         | 7         | 4         | 2         | 0         | 1         | Bacteria; Chlamydiae; Chlamydia; Chlamydiales; Rhabdochlamydiaceae; Candidatus_Rhabdochlamydia |
| Otu3338 | 0       | 0       | 0       | 1        | 0       | 2        | 0         | 2         | 0         | 0         | 0         | 0         | Bacteria; Actinobacteria; Acidimicrobiia; Acidimicrobiales                                     |
| Otu746  | 0       | 6       | 1       | 1        | 19      | 1        | 0         | 0         | 0         | 1         | 1         | 0         | Bacteria; Verrucomicrobia; Pedosphaerae; Pedosphaerales                                        |
| Otu3339 | 0       | 0       | 2       | 0        | 1       | 0        | 1         | 0         | 0         | 1         | 2         | 1         | Bacteria; Proteobacteria; Deltaproteobacteria; Syntrophobacteriales; Syntrophobacteraceae      |
| Otu961  | 2       | 0       | 0       | 0        | 0       | 13       | 0         | 0         | 0         | 0         | 0         | 1         | Bacteria; Proteobacteria                                                                       |
| Otu4436 | 1       | 3       | 0       | 0        | 0       | 1        | 0         | 0         | 0         | 0         | 0         | 0         | Bacteria; Proteobacteria; Alphaproteobacteria; Rhodospirillales; Rhodospirillaceae             |
| Otu960  | 10      | 2       | 2       | 2        | 0       | 5        | 2         | 5         | 12        | 1         | 1         | 11        | Bacteria; Proteobacteria; Deltaproteobacteria; Myxococcales                                    |
| Otu743  | 5       | 13      | 10      | 10       | 17      | 13       | 9         | 9         | 6         | 2         | 19        | 1         | Bacteria; Actinobacteria; Acidimicrobiia; Acidimicrobiales                                     |

| #OTU ID | Z31DRh1 | Z31DRh2 | Z31DRh3 | Z31DRh4r | Z31DRh5 | Z31DRh6r | Z31J1DRh1 | Z31J1DRh2 | Z31J1DRh3 | Z31J1DRh4 | Z31J1DRh5 | Z31J1DRh6 | taxonomy                                                                                  |
|---------|---------|---------|---------|----------|---------|----------|-----------|-----------|-----------|-----------|-----------|-----------|-------------------------------------------------------------------------------------------|
| Otu4276 | 0       | 0       | 0       | 0        | 0       | 0        | 0         | 0         | 0         | 0         | 0         | 5         | Bacteria; Proteobacteria; Betaproteobacteria                                              |
| Otu742  | 14      | 9       | 24      | 38       | 14      | 30       | 4         | 5         | 11        | 4         | 3         | 26        | Bacteria; Proteobacteria; Deltaproteobacteria; Myxococcales                               |
| Otu4348 | 0       | 0       | 0       | 0        | 3       | 1        | 1         | 1         | 0         | 1         | 0         | 0         | Bacteria; Chloroflexi; Ktedonobacteria; JG30-KF-AS9                                       |
| Otu741  | 6       | 6       | 14      | 20       | 9       | 16       | 16        | 18        | 6         | 30        | 13        | 12        | Bacteria; Gemmatimonadetes; Gemmatimonadetes; Ellin5290                                   |
| Otu740  | 4       | 0       | 4       | 5        | 1       | 2        | 3         | 6         | 14        | 1         | 1         | 1         | Bacteria; TM6; SJA-4                                                                      |
| Otu4277 | 0       | 0       | 0       | 0        | 0       | 0        | 0         | 2         | 0         | 0         | 0         | 0         | Bacteria; Chlamydiae; Chlamydia; Chlamydiales                                             |
| Otu4349 | 0       | 0       | 0       | 0        | 1       | 0        | 0         | 0         | 0         | 0         | 5         | 0         | Bacteria; Planctomycetes; Planctomycetia; Gemmatales; Gemmataceae                         |
| Otu2979 | 0       | 0       | 1       | 2        | 0       | 0        | 0         | 0         | 0         | 0         | 0         | 0         | Bacteria                                                                                  |
| Otu2978 | 0       | 0       | 2       | 0        | 3       | 2        | 1         | 2         | 0         | 0         | 1         | 0         | Bacteria; Elusimicrobia; Elusimicrobia; FAC88                                             |
| Otu4274 | 0       | 0       | 0       | 0        | 0       | 3        | 0         | 0         | 0         | 2         | 1         | 1         | Bacteria; Proteobacteria; Deltaproteobacteria                                             |
| Otu2973 | 1       | 0       | 0       | 4        | 4       | 0        | 0         | 0         | 0         | 0         | 0         | 0         | Bacteria; Proteobacteria; Alphaproteobacteria; BD7-3                                      |
| Otu2972 | 0       | 0       | 0       | 0        | 0       | 0        | 0         | 2         | 0         | 0         | 0         | 0         | Bacteria; Proteobacteria                                                                  |
| Otu2971 | 0       | 0       | 0       | 0        | 2       | 0        | 0         | 0         | 0         | 0         | 0         | 0         | Bacteria; Proteobacteria                                                                  |
| Otu2970 | 0       | 2       | 0       | 0        | 1       | 1        | 0         | 0         | 0         | 2         | 0         | 0         | Bacteria; Proteobacteria; Deltaproteobacteria; NB1-j                                      |
| Otu2977 | 0       | 1       | 0       | 0        | 0       | 2        | 1         | 4         | 2         | 0         | 0         | 0         | Bacteria; Actinobacteria; Thermoleophilia; Solirubrobacterales; Patulibacteraceae         |
| Otu2976 | 2       | 0       | 0       | 0        | 0       | 3        | 0         | 0         | 0         | 0         | 0         | 0         | Bacteria; Verrucomicrobia; Pedosphaerae; Pedosphaerales                                   |
| Otu2975 | 0       | 2       | 0       | 0        | 0       | 2        | 0         | 0         | 0         | 0         | 0         | 0         | Bacteria; Proteobacteria; Deltaproteobacteria; FAC87                                      |
| Otu2974 | 0       | 0       | 0       | 0        | 0       | 0        | 0         | 1         | 0         | 3         | 1         | 0         | Bacteria                                                                                  |
| Otu2822 | 0       | 0       | 0       | 0        | 0       | 1        | 2         | 1         | 2         | 1         | 1         | 0         | Bacteria; TM7; TM7-1                                                                      |
| Otu1279 | 1       | 3       | 0       | 6        | 2       | 0        | 8         | 0         | 0         | 1         | 4         | 0         | Bacteria; Gemmatimonadetes; Gemmatimonadetes                                              |
| Otu1278 | 4       | 8       | 1       | 5        | 6       | 1        | 2         | 2         | 4         | 16        | 5         | 1         | Bacteria                                                                                  |
| Otu1275 | 3       | 13      | 0       | 2        | 5       | 9        | 3         | 0         | 2         | 5         | 10        | 0         | Bacteria; Proteobacteria; Deltaproteobacteria; Syntrophobacteriales; Syntrophobacteraceae |

| #OTU ID | Z31DRh1 | Z31DRh2 | Z31DRh3 | Z31DRh4r | Z31DRh5 | Z31DRh6r | Z31J1DRh1 | Z31J1DRh2 | Z31J1DRh3 | Z31J1DRh4 | Z31J1DRh5 | Z31J1DRh6 | taxonomy                                                                                            |
|---------|---------|---------|---------|----------|---------|----------|-----------|-----------|-----------|-----------|-----------|-----------|-----------------------------------------------------------------------------------------------------|
| Otu1274 | 17      | 37      | 25      | 52       | 33      | 47       | 25        | 80        | 36        | 15        | 29        | 28        | Bacteria; Actinobacteria; Actinobacteria; Actinomycetales; Micromonosporaceae                       |
| Otu1277 | 3       | 2       | 1       | 3        | 1       | 2        | 5         | 4         | 8         | 4         | 2         | 3         | Bacteria; Gemmatimonadetes; Gemmatimonadetes                                                        |
| Otu1276 | 4       | 5       | 3       | 11       | 14      | 6        | 7         | 6         | 10        | 5         | 12        | 5         | Bacteria; Actinobacteria; Thermoleophilia; Solirubrobacterales; Patulibacteraceae                   |
| Otu1271 | 3       | 8       | 2       | 0        | 9       | 3        | 7         | 10        | 0         | 0         | 12        | 1         | Bacteria; Proteobacteria; Deltaproteobacteria; Myxococcales; Haliangiaceae                          |
| Otu1270 | 1       | 0       | 0       | 0        | 0       | 10       | 1         | 2         | 0         | 0         | 1         | 1         | Bacteria; Chloroflexi; Ktedonobacteria; Ktedonobacterales; Ktedonobacteraceae                       |
| Otu1273 | 0       | 7       | 2       | 5        | 8       | 4        | 8         | 2         | 0         | 5         | 7         | 1         | Bacteria; Armatimonadetes; Fimbriimonadia; Fimbriimonadales; Fimbriimonadaceae; Fimbriimonas        |
| Otu1272 | 3       | 5       | 2       | 3        | 5       | 16       | 5         | 3         | 7         | 7         | 10        | 5         | Bacteria; Actinobacteria; Thermoleophilia; Solirubrobacterales                                      |
| Otu3094 | 2       | 6       | 2       | 1        | 4       | 18       | 5         | 2         | 4         | 0         | 2         | 4         | Bacteria; Proteobacteria; Gammaproteobacteria; Xanthomonadales; Xanthomonadaceae                    |
| Otu4275 | 2       | 0       | 0       | 0        | 0       | 0        | 0         | 0         | 0         | 0         | 0         | 0         | Bacteria; Proteobacteria; Gammaproteobacteria; Xanthomonadales; Xanthomonadaceae                    |
| Otu1479 | 0       | 0       | 1       | 9        | 0       | 1        | 0         | 0         | 1         | 0         | 0         | 0         | Bacteria; Proteobacteria; Gammaproteobacteria; Legionellales                                        |
| Otu1478 | 0       | 0       | 0       | 0        | 0       | 1        | 0         | 0         | 0         | 7         | 2         | 0         | Bacteria; Proteobacteria; Deltaproteobacteria; Myxococcales                                         |
| Otu1477 | 1       | 1       | 1       | 2        | 2       | 7        | 1         | 3         | 5         | 2         | 0         | 2         | Bacteria; Proteobacteria; Gammaproteobacteria; Xanthomonadales; Sinobacteraceae                     |
| Otu1476 | 9       | 3       | 0       | 5        | 3       | 34       | 10        | 0         | 9         | 4         | 6         | 6         | Bacteria; Actinobacteria; Actinobacteria; Actinomycetales; Nocardioideae                            |
| Otu1475 | 28      | 17      | 24      | 38       | 33      | 96       | 19        | 23        | 37        | 51        | 32        | 13        | Bacteria; Verrucomicrobia; Opitutae; Opitutales; Opitutaceae; Opitutus                              |
| Otu1474 | 1       | 0       | 1       | 11       | 2       | 0        | 0         | 1         | 1         | 8         | 2         | 0         | Bacteria; Bacteroidetes; Sphingobacteria; Sphingobacteriales; Sphingobacteriaceae; Sphingobacterium |
| Otu1473 | 5       | 8       | 12      | 13       | 3       | 9        | 3         | 5         | 2         | 0         | 2         | 0         | Bacteria; Verrucomicrobia; Spartobacteria; Chthoniobacterales; Chthoniobacteraceae; OR-59           |
| Otu1472 | 2       | 8       | 5       | 10       | 2       | 6        | 5         | 9         | 2         | 11        | 6         | 5         | Bacteria; Proteobacteria; Alphaproteobacteria; Rhodospirillales; Rhodospirillaceae                  |
| Otu1471 | 0       | 2       | 1       | 0        | 1       | 1        | 1         | 6         | 0         | 1         | 3         | 0         | Bacteria; FBP                                                                                       |
| Otu1470 | 3       | 3       | 3       | 8        | 2       | 8        | 3         | 0         | 0         | 6         | 3         | 1         | Bacteria; Armatimonadetes; Chthonomonadetes; SJA-22                                                 |
| Otu3422 | 9       | 5       | 3       | 0        | 1       | 4        | 2         | 1         | 2         | 0         | 5         | 2         | Bacteria; Proteobacteria; Deltaproteobacteria; Myxococcales; Haliangiaceae                          |
| Otu4303 | 0       | 0       | 0       | 0        | 0       | 0        | 0         | 0         | 2         | 0         | 0         | 0         | Bacteria; Bacteroidetes                                                                             |
| Otu3423 | 0       | 2       | 0       | 0        | 0       | 0        | 0         | 0         | 0         | 0         | 0         | 0         | Bacteria; Proteobacteria; Gammaproteobacteria; Legionellales                                        |



| #OTU ID | Z31DRh1 | Z31DRh2 | Z31DRh3 | Z31DRh4r | Z31DRh5 | Z31DRh6r | Z31J1DRh1 | Z31J1DRh2 | Z31J1DRh3 | Z31J1DRh4 | Z31J1DRh5 | Z31J1DRh6 | taxonomy                                                                                    |
|---------|---------|---------|---------|----------|---------|----------|-----------|-----------|-----------|-----------|-----------|-----------|---------------------------------------------------------------------------------------------|
| Otu2620 | 0       | 0       | 0       | 0        | 0       | 0        | 0         | 2         | 0         | 0         | 0         | 0         | Bacteria; Proteobacteria                                                                    |
| Otu4340 | 0       | 2       | 0       | 2        | 0       | 0        | 0         | 1         | 0         | 0         | 0         | 0         | Bacteria; Bacteroidetes; Cytophagia; Cytophagales                                           |
| Otu2807 | 1       | 6       | 5       | 46       | 2       | 5        | 6         | 2         | 19        | 12        | 0         | 8         | Bacteria; Proteobacteria; Alphaproteobacteria; Rhodospirillales; Rhodospirillaceae          |
| Otu2788 | 0       | 1       | 0       | 2        | 0       | 0        | 0         | 1         | 1         | 0         | 0         | 0         | Bacteria; Planctomycetes; Planctomycetia; Gemmatales; Gemmataceae; Gemmata                  |
| Otu2805 | 2       | 0       | 0       | 2        | 0       | 2        | 0         | 0         | 0         | 1         | 0         | 0         | Bacteria; Bacteroidetes; Saprospirae; Saprospirales; Chitinophagaceae                       |
| Otu2804 | 0       | 1       | 1       | 2        | 1       | 1        | 1         | 0         | 0         | 0         | 1         | 0         | Bacteria; Planctomycetes; Phycisphaerae; WD2101                                             |
| Otu2803 | 0       | 2       | 0       | 0        | 0       | 0        | 0         | 0         | 0         | 0         | 0         | 0         | Bacteria; Proteobacteria; Deltaproteobacteria; Myxococcales                                 |
| Otu2802 | 0       | 0       | 2       | 0        | 0       | 0        | 0         | 0         | 0         | 0         | 0         | 0         | Bacteria; Tenericutes; Mollicutes; Anaeroplasmatales; Anaeroplasmataceae; Asteroleplasma    |
| Otu2801 | 0       | 0       | 0       | 0        | 17      | 1        | 0         | 0         | 0         | 0         | 0         | 0         | Bacteria; Bacteroidetes; Cytophagia; Cytophagales; Cytophagaceae; Dyadobacter               |
| Otu2789 | 0       | 0       | 0       | 1        | 0       | 0        | 0         | 0         | 0         | 2         | 0         | 0         | Bacteria; OD1; ZB2                                                                          |
| Otu3408 | 0       | 0       | 0       | 0        | 0       | 2        | 0         | 0         | 0         | 0         | 0         | 0         | Bacteria; Planctomycetes; Phycisphaerae; WD2101                                             |
| Otu3409 | 18      | 12      | 8       | 21       | 10      | 31       | 21        | 14        | 18        | 9         | 13        | 10        | Bacteria; Proteobacteria; Deltaproteobacteria; Myxococcales                                 |
| Otu3653 | 0       | 1       | 0       | 1        | 0       | 0        | 1         | 2         | 0         | 1         | 2         | 2         | Bacteria; Planctomycetes; Planctomycetia; Planctomycetales; Planctomycetaceae; Planctomyces |
| Otu2809 | 0       | 0       | 0       | 1        | 0       | 2        | 2         | 0         | 1         | 3         | 0         | 2         | Bacteria; OD1; SM2F11                                                                       |
| Otu2808 | 0       | 0       | 0       | 1        | 2       | 0        | 0         | 2         | 0         | 0         | 0         | 2         | Bacteria; Actinobacteria; Actinobacteria; Actinomycetales; Geodermatophilaceae              |
| Otu3019 | 0       | 0       | 0       | 0        | 0       | 0        | 0         | 0         | 0         | 0         | 2         | 0         | Bacteria                                                                                    |
| Otu3652 | 0       | 0       | 0       | 0        | 0       | 0        | 0         | 0         | 0         | 2         | 0         | 0         | Bacteria                                                                                    |
| Otu4344 | 0       | 0       | 0       | 0        | 0       | 0        | 2         | 0         | 0         | 0         | 0         | 0         | Bacteria; Proteobacteria; Betaproteobacteria; Procabacteriales; Procabacteriaceae           |
| Otu4205 | 0       | 0       | 0       | 1        | 0       | 0        | 0         | 0         | 0         | 0         | 5         | 0         | Bacteria                                                                                    |
| Otu3655 | 2       | 0       | 0       | 0        | 0       | 0        | 0         | 0         | 0         | 0         | 0         | 0         | Bacteria; Planctomycetes; Phycisphaerae; WD2101                                             |
| Otu4345 | 0       | 0       | 2       | 2        | 2       | 5        | 0         | 3         | 0         | 0         | 0         | 4         | Bacteria; Actinobacteria; Actinobacteria; Actinomycetales; Micromonosporaceae; Pilimelia    |
| Otu3654 | 0       | 0       | 1       | 0        | 0       | 2        | 0         | 2         | 0         | 0         | 0         | 0         | Bacteria; Proteobacteria; Deltaproteobacteria                                               |

| #OTU ID | Z31DRh1 | Z31DRh2 | Z31DRh3 | Z31DRh4r | Z31DRh5 | Z31DRh6r | Z31J1DRh1 | Z31J1DRh2 | Z31J1DRh3 | Z31J1DRh4 | Z31J1DRh5 | Z31J1DRh6 | taxonomy                                                                                    |
|---------|---------|---------|---------|----------|---------|----------|-----------|-----------|-----------|-----------|-----------|-----------|---------------------------------------------------------------------------------------------|
| Otu3657 | 0       | 2       | 1       | 0        | 0       | 0        | 0         | 0         | 0         | 0         | 1         | 0         | Bacteria; Chloroflexi; Anaerolineae; SBR1031; oc28                                          |
| Otu3656 | 2       | 0       | 2       | 1        | 0       | 5        | 0         | 1         | 0         | 0         | 0         | 0         | Bacteria; FBP                                                                               |
| Otu2780 | 8       | 19      | 1       | 1        | 4       | 3        | 15        | 0         | 6         | 2         | 5         | 0         | Bacteria; Bacteroidetes; Saprospirae; Saprospirales; Chitinophagaceae                       |
| Otu1589 | 37      | 71      | 6       | 14       | 9       | 8        | 21        | 16        | 1         | 9         | 1         | 5         | Bacteria; Acidobacteria; Chloracidobacteria; RB41; Ellin6075                                |
| Otu1588 | 5       | 4       | 4       | 8        | 4       | 3        | 2         | 3         | 3         | 8         | 11        | 1         | Bacteria; Gemmatimonadetes; Gemmatimonadetes                                                |
| Otu98   | 243     | 72      | 26      | 57       | 37      | 126      | 67        | 75        | 18        | 59        | 39        | 14        | Bacteria; Proteobacteria; Deltaproteobacteria; Myxococcales                                 |
| Otu99   | 9       | 10      | 45      | 58       | 26      | 98       | 16        | 187       | 8         | 33        | 3         | 165       | Bacteria; Actinobacteria; Actinobacteria; Actinomycetales; Pseudonocardiales; Amycolatopsis |
| Otu2781 | 0       | 2       | 0       | 1        | 4       | 0        | 0         | 0         | 2         | 0         | 0         | 0         | Bacteria                                                                                    |
| Otu94   | 154     | 128     | 152     | 238      | 78      | 221      | 130       | 90        | 110       | 105       | 46        | 17        | Bacteria; Acidobacteria; Chloracidobacteria; RB41; Ellin6075                                |
| Otu95   | 28      | 3       | 42      | 54       | 52      | 308      | 32        | 92        | 68        | 18        | 35        | 9         | Bacteria; Planctomycetes; Phycisphaerae; WD2101                                             |
| Otu96   | 81      | 291     | 48      | 117      | 323     | 172      | 100       | 109       | 42        | 308       | 119       | 25        | Bacteria; Bacteroidetes; Saprospirae; Saprospirales; Chitinophagaceae; Niastella            |
| Otu97   | 37      | 40      | 26      | 68       | 24      | 154      | 31        | 30        | 31        | 11        | 24        | 26        | Bacteria; Planctomycetes; Planctomycetia; Planctomycetales; Planctomycetaceae; Planctomyces |
| Otu90   | 9       | 0       | 5       | 7        | 25      | 255      | 2         | 3         | 31        | 3         | 9         | 1         | Bacteria; Cyanobacteria; Chloroplast; Stramenopiles                                         |
| Otu91   | 102     | 9       | 17      | 28       | 6       | 197      | 8         | 4         | 6         | 6         | 2         | 17        | Bacteria; Bacteroidetes; Saprospirae; Saprospirales; Chitinophagaceae                       |
| Otu92   | 27      | 13      | 19      | 39       | 47      | 189      | 79        | 132       | 90        | 107       | 51        | 61        | Bacteria; Acidobacteria; Acidobacteriia; Acidobacteriales; Koribacteraceae                  |
| Otu93   | 11      | 3       | 40      | 142      | 248     | 22       | 30        | 6         | 23        | 3         | 51        | 5         | Bacteria; Proteobacteria; Betaproteobacteria; Rhodocyclales; Rhodocyclaceae                 |
| Otu4188 | 0       | 1       | 0       | 2        | 0       | 0        | 0         | 0         | 0         | 0         | 0         | 0         | Bacteria; Chloroflexi; Anaerolineae; GCA004                                                 |
| Otu4189 | 0       | 0       | 0       | 0        | 0       | 2        | 0         | 0         | 0         | 0         | 0         | 0         | Bacteria; Proteobacteria; TA18; PHOS-HD29                                                   |
| Otu3484 | 0       | 0       | 3       | 0        | 0       | 2        | 6         | 3         | 0         | 1         | 3         | 0         | Bacteria; Actinobacteria; Thermoleophilia; Solirubrobacterales; Patulibacteraceae           |
| Otu4185 | 29      | 24      | 11      | 32       | 46      | 87       | 30        | 59        | 35        | 52        | 49        | 23        | Bacteria; Acidobacteria; Acidobacteriia; Acidobacteriales; Koribacteraceae                  |
| Otu4186 | 0       | 3       | 0       | 0        | 0       | 0        | 0         | 0         | 0         | 0         | 0         | 0         | Bacteria                                                                                    |
| Otu4187 | 0       | 0       | 0       | 0        | 0       | 0        | 0         | 0         | 0         | 0         | 2         | 0         | Bacteria; Planctomycetes                                                                    |

| #OTU ID | Z31DRh1 | Z31DRh2 | Z31DRh3 | Z31DRh4r | Z31DRh5 | Z31DRh6r | Z31J1DRh1 | Z31J1DRh2 | Z31J1DRh3 | Z31J1DRh4 | Z31J1DRh5 | Z31J1DRh6 | taxonomy                                                                                      |
|---------|---------|---------|---------|----------|---------|----------|-----------|-----------|-----------|-----------|-----------|-----------|-----------------------------------------------------------------------------------------------|
| Otu4180 | 0       | 0       | 0       | 0        | 0       | 0        | 0         | 0         | 0         | 2         | 0         | 0         | Bacteria; Acidobacteria; Chloracidobacteria; RB41                                             |
| Otu4181 | 0       | 0       | 0       | 0        | 2       | 0        | 0         | 0         | 0         | 0         | 0         | 0         | Bacteria; Proteobacteria; Deltaproteobacteria; Myxococcales                                   |
| Otu4182 | 0       | 2       | 0       | 0        | 0       | 0        | 0         | 0         | 0         | 0         | 2         | 0         | Bacteria; Verrucomicrobia; Pedosphaerae; Pedosphaerales; auto67_4W                            |
| Otu4183 | 2       | 2       | 0       | 0        | 2       | 3        | 3         | 0         | 2         | 0         | 1         | 0         | Bacteria; Chloroflexi; Chloroflexi; Roseiflexales; Kouleothrixaceae                           |
| Otu3538 | 2       | 0       | 0       | 0        | 0       | 0        | 0         | 0         | 0         | 0         | 0         | 0         | Bacteria                                                                                      |
| Otu1551 | 0       | 2       | 2       | 3        | 3       | 7        | 6         | 0         | 0         | 0         | 6         | 0         | Bacteria; Proteobacteria; Alphaproteobacteria; Rhodospirillales; Rhodospirillaceae            |
| Otu3534 | 0       | 3       | 0       | 2        | 0       | 2        | 0         | 0         | 1         | 0         | 1         | 2         | Bacteria; Firmicutes; Bacilli; Bacillales; Thermoactinomycetaceae; Planifilum                 |
| Otu3535 | 0       | 0       | 0       | 0        | 0       | 0        | 0         | 0         | 0         | 0         | 2         | 0         | Bacteria; Proteobacteria; Betaproteobacteria                                                  |
| Otu3536 | 0       | 2       | 1       | 0        | 2       | 4        | 0         | 0         | 2         | 0         | 0         | 1         | Bacteria; Planctomycetes; Phycisphaerae; WD2101                                               |
| Otu2787 | 0       | 4       | 0       | 2        | 3       | 0        | 0         | 1         | 0         | 1         | 1         | 1         | Bacteria; Proteobacteria; Deltaproteobacteria; FAC87                                          |
| Otu3530 | 0       | 4       | 1       | 1        | 5       | 3        | 4         | 0         | 0         | 2         | 3         | 1         | Bacteria; Verrucomicrobia; Pedosphaerae; Pedosphaerales; Ellin515                             |
| Otu3531 | 0       | 0       | 2       | 0        | 0       | 0        | 0         | 0         | 0         | 0         | 0         | 0         | Bacteria; Acidobacteria; Solibacteres; Solibacterales; MVS-65                                 |
| Otu3532 | 0       | 0       | 0       | 1        | 0       | 0        | 0         | 0         | 0         | 0         | 2         | 0         | Bacteria; TM7; TM7-1                                                                          |
| Otu3533 | 0       | 0       | 0       | 0        | 0       | 0        | 0         | 2         | 0         | 0         | 0         | 0         | Bacteria; Chlamydiae; Chlamydia; Chlamydiales; Parachlamydiaceae                              |
| Otu1055 | 5       | 5       | 4       | 9        | 6       | 10       | 5         | 6         | 4         | 2         | 10        | 5         | Bacteria; Actinobacteria; Acidimicrobiia; Acidimicrobiales; EB1017                            |
| Otu1054 | 2       | 24      | 4       | 3        | 18      | 28       | 18        | 9         | 4         | 13        | 22        | 8         | Bacteria; Acidobacteria; Acidobacteria-6; iii1-15                                             |
| Otu1057 | 3       | 4       | 11      | 7        | 5       | 2        | 2         | 7         | 10        | 2         | 5         | 10        | Bacteria; Actinobacteria; Actinobacteria; Actinomycetales; Micromonosporaceae; Catellatospora |
| Otu1056 | 1       | 0       | 3       | 2        | 3       | 9        | 2         | 0         | 6         | 1         | 2         | 0         | Bacteria; Proteobacteria; Deltaproteobacteria; Spirobacillales                                |
| Otu1051 | 11      | 2       | 8       | 6        | 4       | 6        | 9         | 8         | 9         | 11        | 5         | 9         | Bacteria; Proteobacteria; Deltaproteobacteria; Myxococcales                                   |
| Otu1050 | 2       | 2       | 0       | 5        | 0       | 7        | 11        | 4         | 1         | 2         | 1         | 1         | Bacteria; Chloroflexi; Anaerolineae; SBR1031; oc28                                            |
| Otu1053 | 12      | 15      | 12      | 19       | 20      | 20       | 25        | 22        | 20        | 24        | 37        | 3         | Bacteria; Proteobacteria; Deltaproteobacteria; Myxococcales                                   |
| Otu1052 | 0       | 5       | 1       | 5        | 1       | 7        | 2         | 3         | 8         | 1         | 6         | 1         | Bacteria; Cyanobacteria; 4C0d-2; MLE1-12                                                      |

| #OTU ID | Z31DRh1 | Z31DRh2 | Z31DRh3 | Z31DRh4r | Z31DRh5 | Z31DRh6r | Z31J1DRh1 | Z31J1DRh2 | Z31J1DRh3 | Z31J1DRh4 | Z31J1DRh5 | Z31J1DRh6 | taxonomy                                                                                     |
|---------|---------|---------|---------|----------|---------|----------|-----------|-----------|-----------|-----------|-----------|-----------|----------------------------------------------------------------------------------------------|
| Otu534  | 13      | 11      | 25      | 18       | 8       | 23       | 13        | 20        | 12        | 10        | 17        | 8         | Bacteria; Chloroflexi; C0119                                                                 |
| Otu535  | 7       | 23      | 12      | 9        | 7       | 41       | 8         | 9         | 2         | 3         | 9         | 0         | Bacteria; Acidobacteria; Acidobacteria-6; iii1-15; mb2424                                    |
| Otu536  | 15      | 8       | 10      | 12       | 18      | 51       | 13        | 15        | 9         | 14        | 16        | 11        | Bacteria; Planctomycetes; Planctomycetia; Pirellulales; Pirellulaceae; Pirellula             |
| Otu537  | 74      | 76      | 40      | 85       | 43      | 72       | 73        | 88        | 70        | 186       | 62        | 139       | Bacteria; Proteobacteria; Betaproteobacteria; Methylophilales; Methylophilaceae              |
| Otu1059 | 8       | 23      | 4       | 3        | 4       | 20       | 0         | 2         | 11        | 1         | 8         | 1         | Bacteria; Bacteroidetes; Flavobacteriia; Flavobacteriales; Flavobacteriaceae; Flavobacterium |
| Otu1058 | 18      | 33      | 31      | 41       | 18      | 48       | 19        | 12        | 11        | 44        | 50        | 3         | Bacteria; Verrucomicrobia; Pedosphaerae; Pedosphaerales; Ellin517                            |
| Otu532  | 0       | 8       | 9       | 11       | 0       | 27       | 13        | 3         | 6         | 8         | 2         | 1         | Bacteria; Proteobacteria; Gammaproteobacteria; Legionellales; Coxiellaceae                   |
| Otu533  | 24      | 26      | 15      | 20       | 19      | 46       | 44        | 46        | 29        | 21        | 28        | 11        | Bacteria; Proteobacteria; Deltaproteobacteria; Myxococcales                                  |
| Otu1297 | 1       | 7       | 1       | 0        | 0       | 8        | 5         | 2         | 4         | 1         | 3         | 1         | Bacteria; Chlamydiae; Chlamydia; Chlamydiales                                                |
| Otu1296 | 0       | 0       | 4       | 5        | 1       | 8        | 2         | 4         | 0         | 2         | 4         | 3         | Bacteria; Planctomycetes; Phycisphaerae; WD2101                                              |
| Otu1294 | 0       | 3       | 0       | 0        | 1       | 5        | 2         | 5         | 0         | 5         | 11        | 0         | Bacteria; TM7; SC3                                                                           |
| Otu1293 | 0       | 10      | 0       | 2        | 0       | 1        | 3         | 0         | 0         | 2         | 5         | 0         | Bacteria; Verrucomicrobia; Pedosphaerae; Pedosphaerales                                      |
| Otu1292 | 0       | 1       | 0       | 7        | 0       | 1        | 0         | 0         | 1         | 0         | 5         | 0         | Bacteria; Armatimonadetes; Fimbriimonadia; Fimbriimonadales; Fimbriimonadaceae; Fimbriimonas |
| Otu1291 | 5       | 2       | 1       | 10       | 3       | 0        | 3         | 4         | 0         | 13        | 1         | 6         | Bacteria; Proteobacteria; Gammaproteobacteria; Legionellales                                 |
| Otu1290 | 2       | 2       | 1       | 2        | 1       | 1        | 0         | 1         | 1         | 0         | 9         | 0         | Bacteria; Proteobacteria; Deltaproteobacteria; Myxococcales; Myxococcaceae; Anaeromyxobacter |
| Otu1299 | 0       | 0       | 0       | 4        | 0       | 18       | 0         | 3         | 0         | 0         | 0         | 0         | Bacteria; Bacteroidetes; Saprospirae; Saprospirales; Chitinophagaceae                        |
| Otu1298 | 4       | 4       | 5       | 5        | 2       | 5        | 4         | 4         | 5         | 5         | 7         | 0         | Bacteria; Planctomycetes; Planctomycetia; Gemmatales; Gemmataceae                            |
| Otu2599 | 0       | 0       | 1       | 0        | 0       | 3        | 1         | 0         | 0         | 0         | 1         | 0         | Bacteria; Proteobacteria; Gammaproteobacteria; Xanthomonadales; Xanthomonadaceae             |
| Otu2598 | 0       | 0       | 0       | 0        | 0       | 4        | 0         | 0         | 0         | 0         | 0         | 0         | Bacteria; Planctomycetes; Phycisphaerae; WD2101                                              |
| Otu2595 | 174     | 295     | 354     | 534      | 223     | 499      | 295       | 182       | 339       | 293       | 131       | 373       | Bacteria; Bacteroidetes; Sphingobacteriia; Sphingobacteriales; Sphingobacteriaceae           |
| Otu2594 | 0       | 0       | 3       | 0        | 4       | 0        | 1         | 0         | 1         | 1         | 1         | 0         | Bacteria; Proteobacteria; Deltaproteobacteria                                                |
| Otu2597 | 2       | 2       | 2       | 4        | 1       | 1        | 4         | 0         | 0         | 1         | 1         | 1         | Bacteria; Planctomycetes; Phycisphaerae; WD2101                                              |

| #OTU ID | Z31DRh1 | Z31DRh2 | Z31DRh3 | Z31DRh4r | Z31DRh5 | Z31DRh6r | Z31J1DRh1 | Z31J1DRh2 | Z31J1DRh3 | Z31J1DRh4 | Z31J1DRh5 | Z31J1DRh6 | taxonomy                                                                                          |
|---------|---------|---------|---------|----------|---------|----------|-----------|-----------|-----------|-----------|-----------|-----------|---------------------------------------------------------------------------------------------------|
| Otu2596 | 0       | 1       | 0       | 7        | 0       | 0        | 0         | 1         | 0         | 0         | 0         | 0         | Bacteria; Firmicutes; Clostridia; Clostridiales; Peptostreptococcaceae                            |
| Otu2591 | 1       | 1       | 2       | 2        | 1       | 5        | 2         | 0         | 1         | 0         | 1         | 0         | Bacteria; Chloroflexi; Chloroflexi; Roseiflexales                                                 |
| Otu2590 | 4       | 0       | 2       | 1        | 1       | 0        | 3         | 1         | 0         | 1         | 1         | 1         | Bacteria; Planctomycetes; Planctomycetia; Gemmatales; Gemmataceae; Gemmata                        |
| Otu2593 | 0       | 4       | 1       | 0        | 3       | 4        | 4         | 0         | 0         | 0         | 2         | 0         | Bacteria; Planctomycetes; OM190; agg27                                                            |
| Otu2592 | 0       | 3       | 5       | 3        | 7       | 1        | 5         | 3         | 1         | 0         | 2         | 0         | Bacteria; Proteobacteria; Deltaproteobacteria; Myxococcales                                       |
| Otu3482 | 0       | 0       | 0       | 0        | 0       | 2        | 0         | 1         | 0         | 0         | 0         | 0         | Bacteria; Proteobacteria                                                                          |
| Otu2759 | 2       | 0       | 2       | 0        | 0       | 1        | 0         | 0         | 0         | 0         | 0         | 0         | Bacteria; Acidobacteria; Acidobacteria-6; CCU21                                                   |
| Otu2758 | 2       | 10      | 2       | 0        | 4       | 0        | 4         | 0         | 0         | 4         | 6         | 1         | Bacteria; Proteobacteria; Deltaproteobacteria; Myxococcales; Haliangiaceae                        |
| Otu2757 | 4       | 0       | 1       | 5        | 0       | 0        | 0         | 0         | 1         | 0         | 0         | 13        | Bacteria; Bacteroidetes; Sphingobacteria; Sphingobacteriales; Sphingobacteriaceae                 |
| Otu2756 | 0       | 2       | 0       | 0        | 0       | 0        | 0         | 0         | 0         | 0         | 0         | 0         | Bacteria; Actinobacteria; Actinobacteria; Actinomycetales; Intrasporangiaceae                     |
| Otu2755 | 2       | 1       | 0       | 3        | 3       | 0        | 2         | 0         | 0         | 0         | 1         | 0         | Bacteria; Verrucomicrobia; Pedosphaerae; Pedosphaerales; auto67_4W                                |
| Otu2754 | 121     | 67      | 73      | 88       | 53      | 104      | 55        | 43        | 27        | 69        | 24        | 10        | Bacteria; Acidobacteria; Chloracidobacteria; RB41; Ellin6075                                      |
| Otu2753 | 10      | 3       | 1       | 5        | 24      | 9        | 2         | 2         | 2         | 7         | 26        | 0         | Bacteria; Acidobacteria; Acidobacteriia; Acidobacteriales; Koribacteraceae; Candidatus_Koribacter |
| Otu2752 | 2       | 1       | 1       | 1        | 0       | 6        | 0         | 1         | 0         | 2         | 1         | 0         | Bacteria; Proteobacteria; Deltaproteobacteria; Myxococcales                                       |
| Otu2751 | 0       | 0       | 2       | 0        | 0       | 0        | 0         | 0         | 0         | 0         | 0         | 0         | Bacteria; Proteobacteria                                                                          |
| Otu2750 | 2       | 0       | 0       | 0        | 0       | 0        | 0         | 0         | 0         | 0         | 0         | 0         | Bacteria; Cyanobacteria; Synechococcophycideae; Pseudanabaenales                                  |
| Otu3628 | 0       | 0       | 0       | 1        | 0       | 1        | 0         | 0         | 0         | 0         | 3         | 0         | Bacteria; TM7; SC3                                                                                |
| Otu2050 | 0       | 0       | 0       | 2        | 3       | 6        | 0         | 1         | 0         | 0         | 2         | 0         | Bacteria; Planctomycetes; Phycisphaerae; WD2101                                                   |
| Otu4341 | 39      | 0       | 0       | 1        | 2       | 2        | 0         | 5         | 0         | 1         | 0         | 17        | Bacteria; Bacteroidetes; Saprospirae; Saprospirales; Chitinophagaceae                             |
| Otu2051 | 0       | 0       | 0       | 0        | 0       | 0        | 0         | 0         | 1         | 4         | 1         | 0         | Bacteria                                                                                          |
| Otu3620 | 0       | 0       | 0       | 0        | 0       | 0        | 2         | 0         | 0         | 0         | 0         | 0         | Bacteria; Proteobacteria                                                                          |
| Otu3621 | 0       | 0       | 0       | 0        | 0       | 0        | 0         | 0         | 0         | 2         | 0         | 0         | Bacteria; Proteobacteria; Gammaproteobacteria; Legionellales; Coxiellaceae                        |

| #OTU ID | Z31DRh1 | Z31DRh2 | Z31DRh3 | Z31DRh4r | Z31DRh5 | Z31DRh6r | Z31J1DRh1 | Z31J1DRh2 | Z31J1DRh3 | Z31J1DRh4 | Z31J1DRh5 | Z31J1DRh6 | taxonomy                                                                                                                  |
|---------|---------|---------|---------|----------|---------|----------|-----------|-----------|-----------|-----------|-----------|-----------|---------------------------------------------------------------------------------------------------------------------------|
| Otu3622 | 0       | 0       | 0       | 0        | 0       | 0        | 0         | 0         | 0         | 0         | 0         | 3         | Bacteria; Proteobacteria; Gammaproteobacteria; Legionellales; Coxiellaceae; Aquicella                                     |
| Otu3623 | 0       | 0       | 0       | 0        | 0       | 0        | 0         | 0         | 0         | 3         | 0         | 0         | Bacteria; Chlamydiae; Chlamydia; Chlamydiales                                                                             |
| Otu3624 | 1       | 0       | 1       | 2        | 0       | 1        | 1         | 1         | 0         | 1         | 2         | 0         | Bacteria; Nitrospirae; Nitrospira; Nitrospirales; Nitrospiraceae                                                          |
| Otu2052 | 9       | 7       | 4       | 6        | 2       | 7        | 5         | 3         | 2         | 6         | 14        | 2         | Bacteria; Planctomycetes; Phycisphaerae; WD2101                                                                           |
| Otu3626 | 0       | 0       | 0       | 0        | 0       | 2        | 0         | 0         | 0         | 0         | 0         | 0         | Bacteria; Bacteroidetes; Saprospirae; Saprospirales; Chitinophagaceae                                                     |
| Otu3483 | 0       | 0       | 0       | 1        | 0       | 2        | 0         | 0         | 0         | 0         | 0         | 0         | Bacteria; Proteobacteria; Deltaproteobacteria; Myxococcales; Haliangiaceae                                                |
| Otu408  | 20      | 31      | 26      | 86       | 40      | 97       | 42        | 40        | 62        | 60        | 74        | 31        | Bacteria; Acidobacteria; Solibacteres; Solibacterales                                                                     |
| Otu409  | 18      | 13      | 1       | 0        | 0       | 41       | 0         | 11        | 0         | 0         | 5         | 0         | Bacteria; Proteobacteria; Alphaproteobacteria; Rhodospirillales; Rhodospirillaceae                                        |
| Otu1123 | 7       | 7       | 11      | 2        | 0       | 5        | 0         | 9         | 1         | 0         | 4         | 1         | Bacteria; Bacteroidetes; Saprospirae; Saprospirales; Chitinophagaceae                                                     |
| Otu1122 | 1       | 0       | 2       | 9        | 0       | 6        | 3         | 4         | 5         | 5         | 4         | 2         | Bacteria; Proteobacteria; TA18; PHOS-HD29                                                                                 |
| Otu1125 | 4       | 7       | 2       | 1        | 2       | 4        | 3         | 2         | 0         | 0         | 10        | 1         | Bacteria; Proteobacteria; Gammaproteobacteria; Xanthomonadales; Sinobacteraceae                                           |
| Otu1127 | 0       | 1       | 0       | 0        | 1       | 11       | 0         | 2         | 1         | 0         | 1         | 0         | Bacteria; Armatimonadetes; Armatimonadia; Armatimonadales; Armatimonadaceae                                               |
| Otu1126 | 5       | 6       | 7       | 8        | 1       | 9        | 0         | 10        | 3         | 2         | 4         | 2         | Bacteria; Planctomycetes; Phycisphaerae; CPla-3                                                                           |
| Otu1129 | 27      | 18      | 83      | 174      | 13      | 61       | 40        | 48        | 70        | 20        | 31        | 49        | Bacteria; Proteobacteria; Betaproteobacteria; Burkholderiales; Burkholderiaceae; Burkholderia                             |
| Otu1128 | 45      | 17      | 30      | 87       | 9       | 56       | 29        | 15        | 25        | 135       | 12        | 45        | Bacteria; Bacteroidetes; Saprospirae; Saprospirales; Chitinophagaceae                                                     |
| Otu402  | 66      | 4       | 4       | 8        | 0       | 20       | 4         | 10        | 3         | 0         | 5         | 17        | Bacteria; Proteobacteria; Gammaproteobacteria; Xanthomonadales; Xanthomonadaceae; Pseudoxanthomonas                       |
| Otu403  | 0       | 0       | 0       | 0        | 0       | 1        | 0         | 1         | 37        | 0         | 0         | 1         | Bacteria                                                                                                                  |
| Otu404  | 13      | 12      | 9       | 32       | 8       | 10       | 21        | 15        | 19        | 49        | 11        | 31        | Bacteria; Proteobacteria; Betaproteobacteria; Methylophilales; Methylophilaceae                                           |
| Otu405  | 33      | 23      | 30      | 59       | 16      | 48       | 25        | 40        | 51        | 18        | 17        | 38        | Bacteria; Proteobacteria; Alphaproteobacteria; Caulobacterales; Caulobacteraceae                                          |
| Otu406  | 2       | 0       | 1       | 2        | 8       | 4        | 0         | 2         | 0         | 1         | 0         | 36        | Bacteria; Proteobacteria; Alphaproteobacteria; Sphingomonadales; Sphingomonadaceae; Sphingopyxis; Sphingopyxis_alaskensis |
| Otu407  | 0       | 0       | 24      | 33       | 0       | 1        | 0         | 14        | 1         | 1         | 3         | 8         | Bacteria; Proteobacteria; Alphaproteobacteria                                                                             |
| Otu660  | 1       | 5       | 12      | 10       | 4       | 7        | 20        | 22        | 7         | 13        | 28        | 7         | Bacteria; Gemmatimonadetes; Gemmatimonadetes; Ellin5290                                                                   |

| #OTU ID | Z31DRh1 | Z31DRh2 | Z31DRh3 | Z31DRh4r | Z31DRh5 | Z31DRh6r | Z31J1DRh1 | Z31J1DRh2 | Z31J1DRh3 | Z31J1DRh4 | Z31J1DRh5 | Z31J1DRh6 | taxonomy                                                                                                  |
|---------|---------|---------|---------|----------|---------|----------|-----------|-----------|-----------|-----------|-----------|-----------|-----------------------------------------------------------------------------------------------------------|
| Otu661  | 4       | 26      | 1       | 1        | 12      | 23       | 8         | 3         | 2         | 7         | 14        | 0         | Bacteria; Planctomycetes; Phycisphaerae; WD2101                                                           |
| Otu662  | 1       | 1       | 1       | 2        | 1       | 33       | 0         | 1         | 1         | 0         | 1         | 2         | Bacteria; Cyanobacteria; Synechococcophycideae; Pseudanabaenales; Pseudanabaenaceae; Leptolyngbya         |
| Otu663  | 6       | 14      | 0       | 30       | 1       | 4        | 7         | 0         | 10        | 2         | 11        | 10        | Bacteria; Proteobacteria; Alphaproteobacteria; Rickettsiales                                              |
| Otu664  | 0       | 0       | 5       | 8        | 10      | 4        | 12        | 10        | 32        | 0         | 2         | 0         | Bacteria; Proteobacteria; Gammaproteobacteria; Legionellales                                              |
| Otu665  | 0       | 24      | 14      | 5        | 24      | 6        | 10        | 1         | 2         | 21        | 29        | 3         | Bacteria; Planctomycetes; Pla4                                                                            |
| Otu666  | 1       | 10      | 9       | 9        | 10      | 6        | 8         | 2         | 3         | 6         | 17        | 1         | Bacteria; Planctomycetes; Planctomycetia; Planctomycetales; Planctomycetaceae; Planctomyces               |
| Otu667  | 0       | 14      | 9       | 5        | 12      | 24       | 7         | 3         | 3         | 7         | 12        | 1         | Bacteria; Chloroflexi; Anaerolineae; SBR1031; A4b                                                         |
| Otu884  | 3       | 3       | 8       | 21       | 0       | 5        | 2         | 5         | 10        | 3         | 11        | 2         | Bacteria                                                                                                  |
| Otu885  | 1       | 20      | 4       | 4        | 5       | 1        | 2         | 0         | 4         | 2         | 18        | 2         | Bacteria; Proteobacteria; Deltaproteobacteria; Myxococcales; Polyangiaceae                                |
| Otu886  | 9       | 19      | 10      | 15       | 24      | 43       | 19        | 23        | 11        | 30        | 21        | 13        | Bacteria; Proteobacteria; Alphaproteobacteria; Rhizobiales; Hyphomicrobiaceae; Rhodoplanes                |
| Otu887  | 0       | 0       | 4       | 14       | 0       | 0        | 0         | 0         | 0         | 0         | 0         | 1         | Bacteria; Bacteroidetes; Sphingobacteriia; Sphingobacteriales                                             |
| Otu880  | 8       | 15      | 5       | 15       | 9       | 20       | 15        | 6         | 12        | 6         | 22        | 10        | Bacteria; Actinobacteria; Thermoleophilia; Solirubrobacterales                                            |
| Otu881  | 3       | 26      | 10      | 12       | 6       | 1        | 9         | 7         | 6         | 5         | 22        | 2         | Bacteria; Nitrospirae; Nitrospira; Nitrospirales; 0319-6A21                                               |
| Otu882  | 16      | 1       | 0       | 1        | 0       | 1        | 3         | 2         | 0         | 0         | 0         | 0         | Bacteria; Planctomycetes; Phycisphaerae; WD2101                                                           |
| Otu883  | 14      | 8       | 8       | 13       | 10      | 1        | 0         | 5         | 10        | 1         | 0         | 6         | Bacteria; Proteobacteria; Gammaproteobacteria; Legionellales                                              |
| Otu390  | 15      | 20      | 14      | 22       | 24      | 36       | 28        | 42        | 14        | 12        | 11        | 7         | Bacteria; Acidobacteria; Acidobacteria-6; iii1-15                                                         |
| Otu391  | 5       | 0       | 3       | 49       | 1       | 5        | 5         | 4         | 14        | 10        | 4         | 5         | Bacteria; Bacteroidetes; Sphingobacteriia; Sphingobacteriales                                             |
| Otu392  | 15      | 1       | 20      | 51       | 11      | 39       | 2         | 3         | 1         | 0         | 1         | 15        | Bacteria; Bacteroidetes; Cytophagia; Cytophagales; Cytophagaceae; Siphonobacter; Siphonobacter_aquaclarae |
| Otu393  | 16      | 42      | 5       | 46       | 9       | 20       | 9         | 9         | 10        | 10        | 9         | 0         | Bacteria; Proteobacteria; Gammaproteobacteria; Xanthomonadales; Sinobacteraceae; Steroidobacter           |
| Otu394  | 24      | 39      | 10      | 17       | 6       | 16       | 83        | 66        | 34        | 37        | 16        | 12        | Bacteria; Bacteroidetes; Saprospirae; Saprospirales; Chitinophagaceae                                     |
| Otu395  | 11      | 20      | 15      | 19       | 6       | 47       | 17        | 34        | 9         | 8         | 6         | 12        | Bacteria; Actinobacteria; Thermoleophilia; Solirubrobacterales                                            |
| Otu396  | 35      | 59      | 39      | 66       | 27      | 25       | 43        | 29        | 18        | 36        | 97        | 15        | Bacteria; Proteobacteria; Betaproteobacteria; SC-I-84                                                     |

| #OTU ID | Z31DRh1 | Z31DRh2 | Z31DRh3 | Z31DRh4r | Z31DRh5 | Z31DRh6r | Z31J1DRh1 | Z31J1DRh2 | Z31J1DRh3 | Z31J1DRh4 | Z31J1DRh5 | Z31J1DRh6 | taxonomy                                                                                      |
|---------|---------|---------|---------|----------|---------|----------|-----------|-----------|-----------|-----------|-----------|-----------|-----------------------------------------------------------------------------------------------|
| Otu397  | 20      | 8       | 20      | 49       | 4       | 44       | 12        | 27        | 19        | 18        | 14        | 10        | Bacteria; Proteobacteria; Deltaproteobacteria; Myxococcales                                   |
| Otu398  | 3       | 55      | 15      | 20       | 27      | 19       | 32        | 12        | 6         | 8         | 34        | 3         | Bacteria; Proteobacteria; Deltaproteobacteria; Syntrophobacterales; Syntrophobacteraceae      |
| Otu399  | 2       | 0       | 0       | 0        | 1       | 41       | 0         | 3         | 0         | 0         | 0         | 7         | Bacteria; Bacteroidetes                                                                       |
| Otu4347 | 0       | 1       | 0       | 0        | 0       | 3        | 1         | 0         | 0         | 1         | 1         | 0         | Bacteria; Proteobacteria; Gammaproteobacteria; Legionellales                                  |
| Otu3754 | 0       | 1       | 0       | 0        | 0       | 3        | 0         | 0         | 0         | 0         | 0         | 0         | Bacteria; Proteobacteria                                                                      |
| Otu3755 | 0       | 5       | 1       | 1        | 2       | 5        | 3         | 3         | 1         | 2         | 1         | 1         | Bacteria; Firmicutes; Clostridia; Clostridiales; Clostridiaceae                               |
| Otu3756 | 0       | 0       | 2       | 0        | 0       | 0        | 0         | 0         | 2         | 0         | 0         | 0         | Bacteria; Proteobacteria; Alphaproteobacteria; Rickettsiales                                  |
| Otu3757 | 1       | 5       | 2       | 1        | 6       | 5        | 1         | 0         | 4         | 2         | 4         | 2         | Bacteria; Actinobacteria; Actinobacteria; Actinomycetales                                     |
| Otu3750 | 0       | 0       | 0       | 0        | 0       | 0        | 0         | 0         | 0         | 0         | 0         | 2         | Bacteria; Proteobacteria; Gammaproteobacteria; Legionellales                                  |
| Otu3751 | 0       | 3       | 0       | 3        | 0       | 5        | 3         | 2         | 1         | 0         | 1         | 0         | Bacteria; Gemmatimonadetes; Gemmatimonadetes; Ellin5290                                       |
| Otu3752 | 0       | 0       | 0       | 1        | 0       | 0        | 0         | 0         | 2         | 0         | 1         | 0         | Bacteria; Actinobacteria; Actinobacteria; Actinomycetales; Kineosporiaceae; Kineococcus       |
| Otu3753 | 1       | 1       | 0       | 1        | 0       | 1        | 1         | 3         | 1         | 2         | 0         | 2         | Bacteria; Bacteroidetes; Saprospirae; Saprospirales; Chitinophagaceae; Segetibacter           |
| Otu4019 | 0       | 0       | 0       | 0        | 0       | 0        | 0         | 0         | 0         | 0         | 2         | 0         | Bacteria; Chlamydiae; Chlamydia; Chlamydiales                                                 |
| Otu2263 | 0       | 15      | 4       | 10       | 6       | 18       | 11        | 4         | 3         | 6         | 1         | 5         | Bacteria; Planctomycetes; Planctomycetia; Pirellulales; Pirellulaceae                         |
| Otu3485 | 11      | 21      | 11      | 18       | 12      | 25       | 30        | 27        | 10        | 27        | 32        | 27        | Bacteria; Proteobacteria; Gammaproteobacteria; Xanthomonadales; Xanthomonadaceae; Thermomonas |
| Otu3758 | 4       | 4       | 1       | 2        | 0       | 1        | 0         | 0         | 0         | 0         | 0         | 1         | Bacteria; Chloroflexi; Ellin6529                                                              |
| Otu3759 | 0       | 1       | 0       | 0        | 0       | 2        | 0         | 0         | 0         | 2         | 0         | 0         | Bacteria; Firmicutes; Clostridia; Clostridiales; Clostridiaceae                               |
| Otu714  | 3       | 1       | 0       | 34       | 14      | 5        | 1         | 0         | 1         | 1         | 0         | 4         | Bacteria; Firmicutes; Bacilli; Bacillales; Paenibacillaceae; Paenibacillus                    |
| Otu715  | 0       | 0       | 0       | 2        | 0       | 23       | 1         | 0         | 0         | 1         | 5         | 1         | Bacteria; Proteobacteria; Betaproteobacteria                                                  |
| Otu716  | 3       | 4       | 1       | 11       | 7       | 33       | 2         | 2         | 2         | 1         | 2         | 3         | Bacteria; Bacteroidetes; Saprospirae; Saprospirales; Chitinophagaceae                         |
| Otu717  | 0       | 5       | 0       | 18       | 1       | 1        | 1         | 0         | 1         | 0         | 0         | 0         | Bacteria; Chlamydiae; Chlamydia; Chlamydiales                                                 |
| Otu710  | 12      | 3       | 2       | 2        | 10      | 7        | 10        | 6         | 17        | 16        | 6         | 5         | Bacteria; Cyanobacteria; 4C0d-2; MLE1-12                                                      |



| #OTU ID | Z31DRh1 | Z31DRh2 | Z31DRh3 | Z31DRh4r | Z31DRh5 | Z31DRh6r | Z31J1DRh1 | Z31J1DRh2 | Z31J1DRh3 | Z31J1DRh4 | Z31J1DRh5 | Z31J1DRh6 | taxonomy                                                                              |
|---------|---------|---------|---------|----------|---------|----------|-----------|-----------|-----------|-----------|-----------|-----------|---------------------------------------------------------------------------------------|
| Otu711  | 6       | 6       | 9       | 7        | 4       | 5        | 28        | 18        | 15        | 8         | 5         | 2         | Bacteria; Acidobacteria; Acidobacteriia; Acidobacteriales; Acidobacteriaceae          |
| Otu712  | 2       | 9       | 7       | 8        | 24      | 22       | 8         | 16        | 12        | 14        | 12        | 5         | Bacteria; Acidobacteria; Solibacteres; Solibacterales                                 |
| Otu713  | 0       | 0       | 19      | 4        | 0       | 0        | 1         | 0         | 0         | 0         | 0         | 0         | Bacteria; Proteobacteria; Gammaproteobacteria; Legionellales                          |
| Otu248  | 3       | 2       | 6       | 34       | 6       | 78       | 1         | 12        | 7         | 7         | 5         | 1         | Bacteria; Chloroflexi; Anaerolineae; SBR1031; oc28                                    |
| Otu249  | 7       | 16      | 18      | 60       | 28      | 94       | 14        | 17        | 15        | 12        | 43        | 5         | Bacteria; Chloroflexi; Anaerolineae; SBR1031; oc28                                    |
| Otu718  | 14      | 17      | 2       | 0        | 1       | 3        | 3         | 2         | 1         | 0         | 8         | 0         | Bacteria; Proteobacteria; Gammaproteobacteria; Legionellales; Coxiellaceae; Aquicella |
| Otu719  | 8       | 0       | 6       | 7        | 1       | 34       | 6         | 10        | 6         | 4         | 2         | 1         | Bacteria; Verrucomicrobia; Opitutae; Opitutales; Opitutaceae; Opitutus                |
| Otu1873 | 0       | 4       | 0       | 2        | 4       | 0        | 0         | 0         | 3         | 0         | 0         | 1         | Bacteria; Proteobacteria; Deltaproteobacteria; Myxococcales                           |
| Otu1872 | 1       | 2       | 0       | 2        | 3       | 6        | 1         | 2         | 3         | 1         | 2         | 2         | Bacteria                                                                              |
| Otu1871 | 5       | 2       | 1       | 10       | 4       | 8        | 4         | 0         | 4         | 0         | 3         | 0         | Bacteria; Proteobacteria; Deltaproteobacteria; Myxococcales                           |
| Otu1870 | 0       | 4       | 0       | 1        | 2       | 2        | 0         | 0         | 0         | 0         | 0         | 0         | Bacteria; Chloroflexi; Chloroflexi; Roseiflexales                                     |
| Otu1877 | 0       | 0       | 0       | 2        | 3       | 0        | 3         | 5         | 0         | 0         | 4         | 1         | Bacteria; Proteobacteria; Gammaproteobacteria                                         |
| Otu1876 | 1       | 4       | 1       | 7        | 1       | 3        | 0         | 0         | 0         | 1         | 0         | 0         | Bacteria; Chloroflexi; Anaerolineae; Caldilineales; Caldilineaceae                    |
| Otu1875 | 8       | 13      | 2       | 7        | 12      | 19       | 10        | 6         | 2         | 26        | 10        | 12        | Bacteria; Gemmatimonadetes; Gemm-1                                                    |
| Otu1874 | 0       | 1       | 5       | 0        | 0       | 0        | 0         | 1         | 3         | 0         | 5         | 0         | Bacteria; Bacteroidetes; Cytophagia; Cytophagales; Cytophagaceae; Hymenobacter        |
| Otu4269 | 54      | 33      | 48      | 87       | 18      | 97       | 29        | 46        | 48        | 51        | 45        | 33        | Bacteria; Proteobacteria; Deltaproteobacteria; Myxococcales; Haliangiaceae            |
| Otu1879 | 17      | 11      | 29      | 30       | 11      | 51       | 17        | 51        | 37        | 22        | 15        | 27        | Bacteria; Planctomycetes; Phycisphaerae; WD2101                                       |
| Otu1878 | 0       | 0       | 10      | 13       | 3       | 8        | 5         | 3         | 0         | 3         | 1         | 1         | Bacteria; Firmicutes; Bacilli; Bacillales; Paenibacillaceae; Paenibacillus            |
| Otu2290 | 1       | 0       | 0       | 0        | 1       | 3        | 0         | 0         | 1         | 0         | 0         | 0         | Bacteria; Chloroflexi; C0119                                                          |
| Otu2375 | 4       | 3       | 2       | 5        | 3       | 7        | 2         | 9         | 5         | 2         | 4         | 2         | Bacteria; Bacteroidetes; Saprospirae; Saprospirales; Chitinophagaceae                 |
| Otu2374 | 2       | 2       | 0       | 1        | 0       | 1        | 0         | 0         | 0         | 4         | 0         | 0         | Bacteria                                                                              |
| Otu2377 | 0       | 0       | 1       | 2        | 3       | 0        | 7         | 0         | 0         | 0         | 1         | 0         | Bacteria; Elusimicrobia; Elusimicrobia; FAC88                                         |

| #OTU ID | Z31DRh1 | Z31DRh2 | Z31DRh3 | Z31DRh4r | Z31DRh5 | Z31DRh6r | Z31J1DRh1 | Z31J1DRh2 | Z31J1DRh3 | Z31J1DRh4 | Z31J1DRh5 | Z31J1DRh6 | taxonomy                                                                                          |
|---------|---------|---------|---------|----------|---------|----------|-----------|-----------|-----------|-----------|-----------|-----------|---------------------------------------------------------------------------------------------------|
| Otu2291 | 0       | 1       | 3       | 0        | 3       | 0        | 1         | 2         | 0         | 0         | 1         | 0         | Bacteria                                                                                          |
| Otu2371 | 0       | 0       | 0       | 2        | 1       | 1        | 3         | 2         | 5         | 1         | 3         | 3         | Bacteria; Proteobacteria; Deltaproteobacteria; Spirobacillales                                    |
| Otu2370 | 0       | 4       | 0       | 2        | 4       | 3        | 3         | 0         | 3         | 0         | 0         | 0         | Bacteria; BRC1; PRR-11                                                                            |
| Otu2373 | 11      | 10      | 14      | 31       | 6       | 19       | 18        | 20        | 23        | 7         | 14        | 11        | Bacteria; Acidobacteria; Solibacteres; Solibacteriales; Solibacteraceae; Candidatus_Solibacter    |
| Otu2372 | 3       | 5       | 0       | 2        | 0       | 4        | 2         | 0         | 1         | 1         | 0         | 0         | Bacteria; Bacteroidetes; Cytophagia; Cytophagales; Cytophagaceae                                  |
| Otu2296 | 16      | 10      | 12      | 34       | 19      | 29       | 15        | 29        | 40        | 29        | 28        | 14        | Bacteria; Bacteroidetes; Saprospirae; Saprospirales; Chitinophagaceae; Flavisolibacter            |
| Otu4126 | 0       | 3       | 0       | 0        | 0       | 0        | 2         | 0         | 0         | 0         | 0         | 0         | Bacteria; Acidobacteria; Acidobacteria-6; CCU21                                                   |
| Otu2379 | 23      | 18      | 4       | 4        | 2       | 39       | 0         | 10        | 1         | 0         | 1         | 12        | Bacteria; Verrucomicrobia; Spartobacteria; Chthoniobacteriales; Chthoniobacteraceae               |
| Otu2378 | 0       | 2       | 0       | 2        | 2       | 2        | 6         | 0         | 4         | 2         | 1         | 0         | Bacteria                                                                                          |
| Otu2297 | 3       | 1       | 1       | 1        | 1       | 3        | 5         | 2         | 2         | 0         | 9         | 0         | Bacteria; Proteobacteria; Gammaproteobacteria; Xanthomonadales; Sinobacteraceae                   |
| Otu2577 | 2       | 1       | 2       | 1        | 2       | 4        | 4         | 0         | 2         | 3         | 2         | 3         | Bacteria; Proteobacteria; Deltaproteobacteria; Syntrophobacteriales; Syntrophobacteraceae         |
| Otu2576 | 0       | 0       | 0       | 0        | 0       | 0        | 0         | 2         | 0         | 0         | 3         | 0         | Bacteria; OD1; Mb-NB09                                                                            |
| Otu2575 | 2       | 0       | 2       | 2        | 0       | 0        | 0         | 0         | 0         | 0         | 3         | 0         | Bacteria; Verrucomicrobia; Pedosphaerae; Pedosphaerales; Ellin517                                 |
| Otu2574 | 0       | 0       | 0       | 0        | 1       | 6        | 0         | 0         | 0         | 0         | 0         | 0         | Bacteria; Proteobacteria; Deltaproteobacteria; Myxococcales                                       |
| Otu2573 | 0       | 0       | 0       | 0        | 0       | 3        | 2         | 0         | 0         | 0         | 0         | 1         | Bacteria; Proteobacteria; Deltaproteobacteria                                                     |
| Otu2294 | 2       | 0       | 0       | 0        | 3       | 0        | 3         | 0         | 2         | 0         | 0         | 0         | Bacteria; Planctomycetes; Planctomycetia; Gemmatales; Gemmataceae                                 |
| Otu2571 | 1       | 0       | 0       | 0        | 0       | 1        | 0         | 0         | 3         | 0         | 0         | 0         | Bacteria; Proteobacteria; Gammaproteobacteria; Legionellales                                      |
| Otu2570 | 0       | 0       | 3       | 1        | 0       | 0        | 0         | 0         | 0         | 0         | 0         | 0         | Bacteria; TM7                                                                                     |
| Otu2295 | 0       | 0       | 0       | 3        | 0       | 0        | 0         | 0         | 2         | 2         | 0         | 0         | Bacteria; Proteobacteria; Gammaproteobacteria; Legionellales; Coxiellaceae                        |
| Otu2579 | 0       | 0       | 0       | 0        | 0       | 0        | 1         | 0         | 0         | 1         | 4         | 0         | Bacteria; Chloroflexi; Chloroflexi; Roseiflexales                                                 |
| Otu2578 | 0       | 0       | 0       | 0        | 0       | 0        | 0         | 3         | 0         | 0         | 0         | 0         | Bacteria; Acidobacteria; Acidobacteriia; Acidobacteriales; Koribacteraceae; Candidatus_Koribacter |
| Otu2111 | 0       | 0       | 0       | 3        | 0       | 0        | 0         | 0         | 0         | 0         | 0         | 0         | Bacteria; TM7; TM7-1                                                                              |

| #OTU ID | Z31DRh1 | Z31DRh2 | Z31DRh3 | Z31DRh4r | Z31DRh5 | Z31DRh6r | Z31J1DRh1 | Z31J1DRh2 | Z31J1DRh3 | Z31J1DRh4 | Z31J1DRh5 | Z31J1DRh6 | taxonomy                                                                                 |
|---------|---------|---------|---------|----------|---------|----------|-----------|-----------|-----------|-----------|-----------|-----------|------------------------------------------------------------------------------------------|
| Otu2110 | 0       | 1       | 1       | 1        | 3       | 4        | 7         | 3         | 1         | 4         | 0         | 4         | Bacteria; Gemmatimonadetes; Gemmatimonadetes; Gemmatimonadales                           |
| Otu2113 | 1       | 1       | 0       | 2        | 0       | 6        | 0         | 1         | 0         | 0         | 0         | 0         | Bacteria; Chloroflexi; Anaerolineae; WCHB1-50                                            |
| Otu4236 | 0       | 0       | 0       | 0        | 0       | 0        | 0         | 0         | 3         | 1         | 0         | 0         | Bacteria; Proteobacteria; Gammaproteobacteria; Legionellales; Coxiellaceae; Aquicella    |
| Otu2112 | 0       | 2       | 0       | 0        | 0       | 0        | 3         | 0         | 1         | 2         | 0         | 0         | Bacteria; Proteobacteria; Gammaproteobacteria; Legionellales; Legionellaceae             |
| Otu3689 | 0       | 0       | 0       | 0        | 0       | 2        | 0         | 0         | 0         | 0         | 0         | 0         | Bacteria; Proteobacteria; Deltaproteobacteria; Myxococcales                              |
| Otu3517 | 0       | 0       | 0       | 2        | 0       | 0        | 0         | 0         | 0         | 0         | 0         | 0         | Bacteria; TM6; SJA-4                                                                     |
| Otu2115 | 1       | 3       | 0       | 2        | 0       | 6        | 0         | 2         | 1         | 1         | 2         | 0         | Bacteria; Actinobacteria; Acidimicrobia; Acidimicrobiales                                |
| Otu4234 | 0       | 0       | 0       | 1        | 0       | 2        | 1         | 1         | 0         | 0         | 0         | 0         | Bacteria; Planctomycetes; Planctomycetia; Gemmatales; Gemmataceae                        |
| Otu2114 | 1       | 0       | 1       | 7        | 0       | 1        | 2         | 0         | 0         | 0         | 0         | 0         | Bacteria; Acidobacteria; Acidobacteria-6; iii1-15                                        |
| Otu3343 | 1       | 0       | 0       | 1        | 0       | 1        | 1         | 2         | 1         | 0         | 2         | 1         | Bacteria; Proteobacteria; Deltaproteobacteria; Myxococcales                              |
| Otu3342 | 0       | 3       | 0       | 1        | 0       | 0        | 1         | 0         | 1         | 0         | 2         | 0         | Bacteria; TM6; SJA-4                                                                     |
| Otu2218 | 0       | 6       | 0       | 3        | 0       | 0        | 0         | 0         | 0         | 0         | 1         | 0         | Bacteria; Verrucomicrobia; Pedosphaerae; Pedosphaerales                                  |
| Otu2219 | 0       | 3       | 0       | 0        | 0       | 0        | 1         | 1         | 4         | 1         | 2         | 0         | Bacteria; Verrucomicrobia; Opitutae; Cerasioccoales; Cerasioccoaceae                     |
| Otu3347 | 0       | 0       | 0       | 0        | 0       | 2        | 0         | 0         | 0         | 0         | 0         | 0         | Bacteria; Planctomycetes; Planctomycetia; Gemmatales; Gemmataceae                        |
| Otu2117 | 1       | 3       | 0       | 0        | 0       | 5        | 3         | 3         | 2         | 2         | 1         | 0         | Bacteria; Cyanobacteria; Chloroplast; Chlorophyta                                        |
| Otu1909 | 1       | 4       | 0       | 3        | 2       | 0        | 0         | 0         | 0         | 0         | 2         | 1         | Bacteria; Planctomycetes; Planctomycetia; Gemmatales; Gemmataceae; Gemmata               |
| Otu1908 | 1       | 0       | 4       | 0        | 2       | 1        | 0         | 2         | 0         | 0         | 7         | 0         | Bacteria; Tenericutes; Mollicutes; Anaeroplasmatales; Anaeroplasmataceae; Asteroleplasma |
| Otu1907 | 0       | 5       | 0       | 1        | 1       | 8        | 0         | 0         | 3         | 0         | 4         | 0         | Bacteria; Bacteroidetes; Cytophagia; Cytophagales; Cytophagaceae                         |
| Otu1906 | 0       | 0       | 0       | 1        | 1       | 0        | 4         | 0         | 0         | 0         | 2         | 0         | Bacteria; Proteobacteria; Deltaproteobacteria; NB1-j                                     |
| Otu1905 | 2       | 7       | 1       | 2        | 0       | 2        | 1         | 1         | 0         | 0         | 1         | 0         | Bacteria; Planctomycetes; Planctomycetia; Gemmatales; Gemmataceae                        |
| Otu1904 | 0       | 0       | 0       | 5        | 0       | 6        | 2         | 1         | 5         | 0         | 2         | 2         | Bacteria; Planctomycetes; Planctomycetia; Gemmatales; Gemmataceae                        |
| Otu1903 | 0       | 0       | 0       | 0        | 4       | 0        | 1         | 0         | 4         | 1         | 2         | 2         | Bacteria; Bacteroidetes; Sphingobacteria; Sphingobacteriales                             |

| #OTU ID | Z31DRh1 | Z31DRh2 | Z31DRh3 | Z31DRh4r | Z31DRh5 | Z31DRh6r | Z31J1DRh1 | Z31J1DRh2 | Z31J1DRh3 | Z31J1DRh4 | Z31J1DRh5 | Z31J1DRh6 | taxonomy                                                                                      |
|---------|---------|---------|---------|----------|---------|----------|-----------|-----------|-----------|-----------|-----------|-----------|-----------------------------------------------------------------------------------------------|
| Otu1902 | 7       | 0       | 4       | 3        | 0       | 2        | 0         | 1         | 0         | 0         | 0         | 0         | Bacteria; Cyanobacteria; 4C0d-2                                                               |
| Otu1901 | 6       | 3       | 4       | 4        | 2       | 3        | 1         | 5         | 5         | 6         | 4         | 1         | Bacteria; Verrucomicrobia; Opiritatae; Opiritutales; Opiritutaceae                            |
| Otu1900 | 3       | 6       | 3       | 4        | 1       | 2        | 0         | 1         | 0         | 0         | 3         | 0         | Bacteria; Planctomycetes; Planctomycetia; Planctomycetales; Planctomycetaceae; Planctomyces   |
| Otu866  | 0       | 12      | 2       | 20       | 4       | 0        | 5         | 0         | 0         | 0         | 1         | 1         | Bacteria; Chloroflexi; Anaerolineae; envOPS12                                                 |
| Otu867  | 6       | 12      | 4       | 10       | 11      | 14       | 7         | 5         | 5         | 6         | 11        | 4         | Bacteria; Actinobacteria; Thermoleophilia; Gaiellales                                         |
| Otu864  | 7       | 14      | 8       | 9        | 8       | 15       | 8         | 6         | 1         | 5         | 8         | 5         | Bacteria                                                                                      |
| Otu865  | 5       | 9       | 5       | 12       | 6       | 30       | 9         | 16        | 13        | 18        | 16        | 10        | Bacteria; Acidobacteria; Solibacteres; Solibacterales; Solibacteraceae; Candidatus_Solibacter |
| Otu862  | 4       | 15      | 3       | 6        | 8       | 12       | 14        | 15        | 7         | 6         | 9         | 4         | Bacteria; Chloroflexi; S085                                                                   |
| Otu863  | 1       | 7       | 6       | 3        | 2       | 0        | 1         | 0         | 1         | 5         | 16        | 1         | Bacteria                                                                                      |
| Otu860  | 14      | 0       | 1       | 0        | 2       | 5        | 0         | 0         | 1         | 2         | 3         | 2         | Bacteria; FBP                                                                                 |
| Otu861  | 2       | 10      | 7       | 12       | 11      | 5        | 17        | 2         | 2         | 9         | 8         | 1         | Bacteria; Proteobacteria; Deltaproteobacteria; Myxococcales                                   |
| Otu2408 | 1       | 3       | 0       | 0        | 1       | 0        | 0         | 0         | 0         | 0         | 0         | 0         | Bacteria; Bacteroidetes; Cytophagia; Cytophagales; Cytophagaceae; Sporocytophaga              |
| Otu3511 | 0       | 3       | 0       | 1        | 2       | 1        | 3         | 2         | 4         | 1         | 0         | 0         | Bacteria; Acidobacteria; Chloracidobacteria                                                   |
| Otu3189 | 0       | 0       | 0       | 0        | 0       | 3        | 0         | 1         | 0         | 0         | 1         | 0         | Bacteria; Cyanobacteria; Chloroplast; Chlorophyta; Chlamydomonadaceae                         |
| Otu3188 | 0       | 0       | 0       | 0        | 0       | 0        | 0         | 0         | 0         | 0         | 2         | 0         | Bacteria; Proteobacteria; Gammaproteobacteria; Legionellales; Coxiellaceae; Aquicella         |
| Otu868  | 14      | 1       | 3       | 12       | 0       | 4        | 2         | 3         | 0         | 2         | 1         | 4         | Bacteria; Proteobacteria; Deltaproteobacteria; Myxococcales                                   |
| Otu869  | 0       | 4       | 4       | 1        | 5       | 1        | 3         | 1         | 0         | 1         | 20        | 1         | Bacteria                                                                                      |
| Otu4378 | 2       | 0       | 1       | 0        | 1       | 0        | 0         | 0         | 0         | 0         | 0         | 0         | Bacteria; Planctomycetes; Phycisphaerae; WD2101                                               |
| Otu4385 | 0       | 2       | 0       | 0        | 2       | 2        | 1         | 0         | 0         | 0         | 0         | 0         | Bacteria; Planctomycetes; Planctomycetia; Planctomycetales; Planctomycetaceae; Planctomyces   |
| Otu3006 | 0       | 0       | 0       | 0        | 0       | 0        | 0         | 0         | 0         | 0         | 2         | 0         | Bacteria                                                                                      |
| Otu2106 | 0       | 0       | 0       | 0        | 0       | 3        | 0         | 0         | 0         | 0         | 0         | 0         | Bacteria; Proteobacteria                                                                      |
| Otu2107 | 2       | 0       | 1       | 1        | 0       | 2        | 1         | 4         | 2         | 0         | 0         | 0         | Bacteria; Chlorobi                                                                            |

| #OTU ID | Z31DRh1 | Z31DRh2 | Z31DRh3 | Z31DRh4r | Z31DRh5 | Z31DRh6r | Z31J1DRh1 | Z31J1DRh2 | Z31J1DRh3 | Z31J1DRh4 | Z31J1DRh5 | Z31J1DRh6 | taxonomy                                                                                           |
|---------|---------|---------|---------|----------|---------|----------|-----------|-----------|-----------|-----------|-----------|-----------|----------------------------------------------------------------------------------------------------|
| Otu2104 | 7       | 4       | 1       | 3        | 4       | 11       | 8         | 10        | 8         | 7         | 4         | 7         | Bacteria; Actinobacteria; Thermoleophilia; Gaiellales; Gaiellaceae                                 |
| Otu2105 | 0       | 1       | 0       | 1        | 0       | 3        | 2         | 1         | 1         | 2         | 1         | 0         | Bacteria; Planctomycetes; Phycisphaerae; WD2101                                                    |
| Otu2102 | 4       | 0       | 0       | 1        | 0       | 1        | 2         | 0         | 3         | 0         | 1         | 0         | Bacteria; TM7; TM7-1                                                                               |
| Otu2103 | 0       | 0       | 0       | 3        | 0       | 0        | 0         | 0         | 0         | 0         | 0         | 0         | Bacteria                                                                                           |
| Otu2100 | 2       | 0       | 0       | 0        | 0       | 4        | 0         | 0         | 2         | 0         | 1         | 2         | Bacteria; Chloroflexi; Ellin6529                                                                   |
| Otu2101 | 0       | 0       | 0       | 3        | 0       | 0        | 0         | 0         | 0         | 0         | 0         | 0         | Bacteria; Chloroflexi; Anaerolineae; GCA004                                                        |
| Otu4239 | 2       | 5       | 0       | 1        | 1       | 0        | 1         | 0         | 2         | 1         | 3         | 0         | Bacteria; Bacteroidetes; Saprospirae; Saprospirales; Chitinophagaceae                              |
| Otu4013 | 0       | 14      | 3       | 0        | 2       | 1        | 1         | 0         | 3         | 6         | 7         | 2         | Bacteria; Actinobacteria; Thermoleophilia; Gaiellales; Gaiellaceae                                 |
| Otu2108 | 2       | 7       | 0       | 0        | 0       | 1        | 1         | 1         | 0         | 0         | 0         | 0         | Bacteria; Actinobacteria; Actinobacteria; Actinomycetales; Cellulomonadaceae; Cellulomonas         |
| Otu2109 | 66      | 0       | 0       | 8        | 51      | 129      | 0         | 0         | 0         | 1         | 0         | 2         | Bacteria; Proteobacteria; Gammaproteobacteria; Enterobacteriales; Enterobacteriaceae; Enterobacter |
| Otu1619 | 3       | 0       | 1       | 3        | 4       | 1        | 0         | 0         | 0         | 2         | 0         | 0         | Bacteria; Acidobacteria; iii1-8; DS-18                                                             |
| Otu1618 | 0       | 0       | 0       | 3        | 2       | 1        | 0         | 1         | 0         | 1         | 4         | 0         | Bacteria; Proteobacteria; Deltaproteobacteria; Myxococcales                                        |
| Otu3989 | 0       | 0       | 0       | 0        | 0       | 2        | 0         | 0         | 0         | 0         | 0         | 0         | Bacteria                                                                                           |
| Otu3988 | 0       | 2       | 1       | 3        | 0       | 1        | 0         | 0         | 2         | 0         | 0         | 1         | Bacteria; Bacteroidetes; Cytophagia; Cytophagales                                                  |
| Otu1613 | 0       | 3       | 0       | 1        | 4       | 3        | 0         | 0         | 0         | 0         | 1         | 0         | Bacteria; Cyanobacteria; 4C0d-2; SM1D11                                                            |
| Otu1612 | 0       | 2       | 1       | 0        | 3       | 5        | 0         | 0         | 2         | 1         | 0         | 0         | Bacteria; Planctomycetes; Planctomycetia; Gemmatales; Gemmataceae                                  |
| Otu1611 | 0       | 6       | 0       | 1        | 4       | 3        | 1         | 0         | 4         | 0         | 11        | 0         | Bacteria; Proteobacteria; Betaproteobacteria; Rhodocyclales; Rhodocyclaceae                        |
| Otu1610 | 2       | 0       | 0       | 2        | 0       | 3        | 0         | 1         | 0         | 0         | 4         | 0         | Bacteria; Chloroflexi; Thermomicrobia                                                              |
| Otu1617 | 7       | 2       | 4       | 2        | 6       | 11       | 5         | 4         | 2         | 7         | 2         | 0         | Bacteria; Acidobacteria; Sva0725; Sva0725                                                          |
| Otu1616 | 0       | 6       | 0       | 0        | 6       | 2        | 9         | 6         | 5         | 1         | 9         | 5         | Bacteria; Proteobacteria; Alphaproteobacteria; Rhodospirillales; Rhodospirillaceae                 |
| Otu1614 | 7       | 3       | 4       | 7        | 1       | 10       | 9         | 0         | 5         | 4         | 4         | 3         | Bacteria; Proteobacteria; Deltaproteobacteria; Myxococcales                                        |
| Otu3291 | 0       | 0       | 0       | 0        | 0       | 0        | 0         | 2         | 0         | 0         | 0         | 0         | Bacteria                                                                                           |

| #OTU ID | Z31DRh1 | Z31DRh2 | Z31DRh3 | Z31DRh4r | Z31DRh5 | Z31DRh6r | Z31J1DRh1 | Z31J1DRh2 | Z31J1DRh3 | Z31J1DRh4 | Z31J1DRh5 | Z31J1DRh6 | taxonomy                                                                                          |
|---------|---------|---------|---------|----------|---------|----------|-----------|-----------|-----------|-----------|-----------|-----------|---------------------------------------------------------------------------------------------------|
| Otu3290 | 0       | 4       | 0       | 0        | 2       | 3        | 4         | 0         | 1         | 0         | 0         | 2         | Bacteria; Armatimonadetes; Fimbriimonadia; Fimbriimonadales; Fimbriimonadaceae; Fimbriimonas      |
| Otu3293 | 0       | 2       | 0       | 0        | 1       | 0        | 0         | 0         | 0         | 1         | 3         | 0         | Bacteria; Planctomycetes; C6; d113                                                                |
| Otu3292 | 0       | 0       | 0       | 1        | 0       | 0        | 1         | 0         | 0         | 2         | 2         | 0         | Bacteria; Proteobacteria; Alphaproteobacteria; Rhodospirillales                                   |
| Otu3295 | 0       | 1       | 0       | 1        | 0       | 20       | 4         | 1         | 3         | 2         | 1         | 9         | Bacteria; Acidobacteria; Acidobacteriia; Acidobacteriales; Koribacteraceae; Candidatus_Koribacter |
| Otu3294 | 0       | 0       | 0       | 2        | 0       | 4        | 0         | 0         | 0         | 0         | 1         | 0         | Bacteria; Proteobacteria; Alphaproteobacteria; Rickettsiales; mitochondria                        |
| Otu3297 | 2       | 0       | 0       | 2        | 0       | 3        | 1         | 0         | 2         | 0         | 1         | 0         | Bacteria; Bacteroidetes                                                                           |
| Otu3296 | 0       | 0       | 0       | 0        | 2       | 0        | 0         | 0         | 0         | 0         | 0         | 0         | Bacteria; WS3; PRR-12; Sediment-1; PRR-10                                                         |
| Otu3299 | 0       | 1       | 1       | 0        | 0       | 0        | 0         | 0         | 1         | 4         | 0         | 0         | Bacteria; Proteobacteria; Deltaproteobacteria; FAC87                                              |
| Otu3298 | 0       | 0       | 0       | 0        | 0       | 2        | 0         | 0         | 0         | 0         | 0         | 0         | Bacteria; Proteobacteria; Alphaproteobacteria; Rickettsiales                                      |
| Otu3967 | 0       | 0       | 2       | 0        | 0       | 2        | 1         | 2         | 1         | 3         | 2         | 2         | Bacteria; Chloroflexi; TK10                                                                       |
| Otu3966 | 0       | 2       | 0       | 0        | 0       | 0        | 0         | 0         | 0         | 0         | 0         | 0         | Bacteria                                                                                          |
| Otu3965 | 1       | 2       | 4       | 2        | 1       | 0        | 1         | 3         | 2         | 5         | 2         | 0         | Bacteria; Planctomycetes; Phycisphaerae; WD2101                                                   |
| Otu3964 | 0       | 0       | 0       | 0        | 0       | 0        | 3         | 3         | 0         | 0         | 0         | 1         | Bacteria; Proteobacteria; Gammaproteobacteria; Legionellales                                      |
| Otu3963 | 0       | 1       | 0       | 2        | 0       | 0        | 0         | 0         | 1         | 0         | 1         | 0         | Bacteria; Tenericutes; Mollicutes; Anaeroplasmatales; Anaeroplasmataceae; Asteroleplasma          |
| Otu3962 | 0       | 3       | 0       | 2        | 2       | 1        | 0         | 1         | 0         | 0         | 4         | 0         | Bacteria; Acidobacteria; Solibacteres; Solibacterales                                             |
| Otu3961 | 0       | 0       | 0       | 0        | 0       | 0        | 0         | 0         | 0         | 2         | 0         | 0         | Bacteria; Proteobacteria; Gammaproteobacteria; Legionellales; Coxiellaceae                        |
| Otu3960 | 0       | 0       | 0       | 0        | 0       | 1        | 2         | 2         | 2         | 0         | 0         | 0         | Bacteria; Proteobacteria; Gammaproteobacteria; Legionellales; Coxiellaceae; Aquicella             |
| Otu3008 | 0       | 1       | 2       | 0        | 0       | 0        | 0         | 1         | 0         | 0         | 0         | 0         | Bacteria; Planctomycetes; Planctomycetia; Gemmatales; Gemmataceae                                 |
| Otu4338 | 0       | 0       | 0       | 8        | 0       | 3        | 1         | 0         | 1         | 0         | 1         | 0         | Bacteria; Actinobacteria; Actinobacteria; Actinomycetales; Micromonosporaceae                     |
| Otu3969 | 0       | 0       | 0       | 0        | 1       | 0        | 2         | 0         | 0         | 0         | 0         | 0         | Bacteria; Bacteroidetes; Cytophagia; Cytophagales; Cytophagaceae                                  |
| Otu3009 | 1       | 0       | 0       | 2        | 1       | 0        | 0         | 0         | 0         | 0         | 1         | 0         | Bacteria; Verrucomicrobia; Opitutae; Cerasioccoales; Cerasioccoaceae                              |
| Otu4337 | 0       | 0       | 0       | 0        | 0       | 3        | 0         | 0         | 0         | 0         | 0         | 0         | Bacteria; Chloroflexi                                                                             |

| #OTU ID | Z31DRh1 | Z31DRh2 | Z31DRh3 | Z31DRh4r | Z31DRh5 | Z31DRh6r | Z31J1DRh1 | Z31J1DRh2 | Z31J1DRh3 | Z31J1DRh4 | Z31J1DRh5 | Z31J1DRh6 | taxonomy                                                                                     |
|---------|---------|---------|---------|----------|---------|----------|-----------|-----------|-----------|-----------|-----------|-----------|----------------------------------------------------------------------------------------------|
| Otu4336 | 0       | 2       | 0       | 1        | 0       | 0        | 0         | 0         | 0         | 0         | 0         | 0         | Bacteria; Acidobacteria; Chloracidobacteria; PK29                                            |
| Otu3186 | 1       | 2       | 3       | 0        | 3       | 2        | 1         | 3         | 3         | 1         | 0         | 2         | Bacteria; Actinobacteria; Acidimicrobiia; Acidimicrobiales; EB1017                           |
| Otu4266 | 0       | 0       | 0       | 0        | 0       | 2        | 0         | 0         | 0         | 0         | 0         | 0         | Bacteria; Proteobacteria; Deltaproteobacteria                                                |
| Otu4335 | 0       | 0       | 0       | 2        | 0       | 0        | 0         | 0         | 0         | 0         | 0         | 0         | Bacteria; Proteobacteria; Alphaproteobacteria; Rickettsiales; mitochondria                   |
| Otu1727 | 0       | 0       | 2       | 2        | 0       | 0        | 0         | 4         | 3         | 1         | 2         | 0         | Bacteria; Chlamydiae; Chlamydia; Chlamydiales                                                |
| Otu1726 | 0       | 0       | 0       | 0        | 3       | 1        | 0         | 1         | 1         | 4         | 0         | 1         | Bacteria                                                                                     |
| Otu1725 | 0       | 0       | 1       | 5        | 4       | 6        | 0         | 2         | 3         | 1         | 3         | 0         | Bacteria; Armatimonadetes; Fimbriimonadia; Fimbriimonadales; Fimbriimonadaceae; Fimbriimonas |
| Otu1724 | 3       | 0       | 4       | 2        | 3       | 2        | 2         | 3         | 2         | 1         | 4         | 1         | Bacteria; Chloroflexi; Ktedonobacteria; JG30-KF-AS9                                          |
| Otu1723 | 6       | 5       | 0       | 0        | 3       | 1        | 0         | 0         | 1         | 2         | 2         | 0         | Bacteria; Acidobacteria; Acidobacteria-6; CCU21                                              |
| Otu1722 | 1       | 1       | 0       | 1        | 0       | 4        | 4         | 4         | 0         | 5         | 5         | 0         | Bacteria; Gemmatimonadetes; Gemm-1                                                           |
| Otu1721 | 0       | 1       | 0       | 0        | 2       | 5        | 3         | 5         | 0         | 0         | 1         | 0         | Bacteria; Proteobacteria; Gammaproteobacteria; Legionellales; Coxiellaceae; Aquicella        |
| Otu1720 | 4       | 0       | 1       | 2        | 0       | 0        | 2         | 0         | 0         | 0         | 1         | 0         | Bacteria; Nitrospirae; Nitrospira; Nitrospirales; 0319-6A21                                  |
| Otu4333 | 1       | 0       | 1       | 4        | 1       | 7        | 0         | 5         | 4         | 3         | 0         | 3         | Bacteria; Verrucomicrobia; Spartobacteria; Chthoniobacteriales; Chthoniobacteraceae          |
| Otu1729 | 0       | 1       | 0       | 5        | 0       | 0        | 0         | 3         | 0         | 0         | 2         | 0         | Bacteria; Chlamydiae; Chlamydia; Chlamydiales                                                |
| Otu1728 | 9       | 9       | 6       | 18       | 4       | 12       | 16        | 10        | 9         | 15        | 11        | 7         | Bacteria; Proteobacteria; Alphaproteobacteria; Rhodospirillales; Rhodospirillaceae           |
| Otu4331 | 0       | 0       | 1       | 0        | 0       | 0        | 0         | 4         | 0         | 0         | 0         | 0         | Bacteria; Bacteroidetes; Saprospirae; Saprospirales; Chitinophagaceae; Niasella              |
| Otu4261 | 0       | 0       | 2       | 0        | 0       | 0        | 0         | 0         | 0         | 0         | 0         | 0         | Bacteria                                                                                     |
| Otu4330 | 0       | 2       | 0       | 0        | 1       | 1        | 0         | 0         | 0         | 0         | 0         | 0         | Bacteria; Fibrobacteres; Fibrobacteria; 258ds10                                              |
| Otu2968 | 0       | 4       | 0       | 2        | 1       | 1        | 0         | 0         | 0         | 0         | 3         | 0         | Bacteria; Nitrospirae; Nitrospira; Nitrospirales; 0319-6A21                                  |
| Otu2969 | 0       | 0       | 0       | 0        | 0       | 0        | 2         | 0         | 0         | 0         | 0         | 0         | Bacteria; Firmicutes; Bacilli; Bacillales; Thermoactinomycetaceae; Shimazuella               |
| Otu4381 | 0       | 0       | 0       | 0        | 1       | 0        | 0         | 0         | 2         | 0         | 0         | 0         | Bacteria; Proteobacteria                                                                     |
| Otu2960 | 0       | 0       | 0       | 0        | 2       | 0        | 0         | 0         | 0         | 0         | 0         | 0         | Bacteria; Acidobacteria; Solibacteres; Solibacterales                                        |

| #OTU ID | Z31DRh1 | Z31DRh2 | Z31DRh3 | Z31DRh4r | Z31DRh5 | Z31DRh6r | Z31J1DRh1 | Z31J1DRh2 | Z31J1DRh3 | Z31J1DRh4 | Z31J1DRh5 | Z31J1DRh6 | taxonomy                                                                                                              |
|---------|---------|---------|---------|----------|---------|----------|-----------|-----------|-----------|-----------|-----------|-----------|-----------------------------------------------------------------------------------------------------------------------|
| Otu2961 | 0       | 0       | 0       | 0        | 0       | 0        | 0         | 0         | 0         | 0         | 2         | 0         | Bacteria; Proteobacteria; Deltaproteobacteria; Desulfobacterales; Desulfobulbaceae                                    |
| Otu2962 | 96      | 40      | 108     | 94       | 62      | 40       | 5         | 96        | 510       | 7         | 13        | 88        | Bacteria; Verrucomicrobia; Spartobacteria; Chthoniobacteriales; Chthoniobacteraceae; Chthoniobacter                   |
| Otu2963 | 0       | 2       | 0       | 0        | 0       | 2        | 2         | 2         | 1         | 6         | 3         | 1         | Bacteria; Verrucomicrobia; Opitutae; Opitutales; Opitutaceae; Opitutus                                                |
| Otu2964 | 0       | 0       | 0       | 0        | 0       | 2        | 0         | 2         | 0         | 0         | 0         | 0         | Bacteria; Proteobacteria; Deltaproteobacteria; Bdellovibrionales; Bdellovibrionaceae; Bdellovibrio                    |
| Otu2293 | 6       | 5       | 11      | 9        | 1       | 5        | 2         | 4         | 2         | 0         | 13        | 2         | Bacteria; Proteobacteria; Betaproteobacteria; SC-I-84                                                                 |
| Otu2966 | 0       | 0       | 0       | 0        | 0       | 2        | 2         | 0         | 1         | 1         | 1         | 0         | Bacteria; Proteobacteria; Alphaproteobacteria                                                                         |
| Otu2967 | 0       | 0       | 0       | 0        | 0       | 5        | 0         | 2         | 0         | 0         | 0         | 0         | Bacteria; Proteobacteria; Alphaproteobacteria; Rhodospirillales; Rhodospirillaceae                                    |
| Otu1268 | 2       | 7       | 1       | 3        | 5       | 11       | 2         | 1         | 1         | 6         | 11        | 0         | Bacteria; Planctomycetes; Phycisphaerae; WD2101                                                                       |
| Otu1269 | 5       | 2       | 9       | 6        | 7       | 12       | 2         | 2         | 4         | 9         | 5         | 8         | Bacteria; Gemmatimonadetes; Gemmatimonadetes; Gemmatimonadales                                                        |
| Otu1262 | 0       | 1       | 3       | 2        | 2       | 1        | 3         | 10        | 6         | 7         | 6         | 1         | Bacteria; ODI; SM2F11                                                                                                 |
| Otu1263 | 1       | 1       | 1       | 1        | 3       | 4        | 5         | 0         | 1         | 0         | 11        | 0         | Bacteria; Spirochaetes; Leptospirae; Leptospirales; Leptospiraceae; Turneriella                                       |
| Otu1260 | 2       | 5       | 8       | 4        | 5       | 1        | 6         | 1         | 2         | 5         | 8         | 0         | Bacteria; Chloroflexi; Anaerolineae; WCHB1-50                                                                         |
| Otu1261 | 0       | 3       | 2       | 1        | 5       | 11       | 3         | 7         | 1         | 1         | 3         | 0         | Bacteria; Chloroflexi; Anaerolineae; GCA004                                                                           |
| Otu1266 | 1       | 0       | 0       | 0        | 0       | 0        | 1         | 9         | 3         | 3         | 0         | 4         | Bacteria; Proteobacteria; Alphaproteobacteria; Rhodospirillales; Rhodospirillaceae                                    |
| Otu1267 | 0       | 0       | 0       | 2        | 0       | 3        | 10        | 9         | 0         | 0         | 3         | 0         | Bacteria; Proteobacteria; Gammaproteobacteria; Legionellales; Coxiellaceae; Aquicella                                 |
| Otu1264 | 2       | 5       | 2       | 2        | 4       | 4        | 0         | 8         | 8         | 0         | 1         | 5         | Bacteria; Actinobacteria; Actinobacteria; Actinomycetales; Sporichthyaceae; Sporichthya                               |
| Otu1265 | 5       | 1       | 2       | 12       | 0       | 10       | 7         | 1         | 1         | 3         | 4         | 9         | Bacteria; Bacteroidetes; Cytophagia; Cytophagales; Cytophagaceae                                                      |
| Otu3275 | 0       | 0       | 0       | 0        | 0       | 0        | 0         | 0         | 0         | 2         | 0         | 0         | Bacteria; Planctomycetes; Planctomycetia; Gemmatales; Gemmataceae                                                     |
| Otu1468 | 1       | 0       | 1       | 0        | 2       | 8        | 3         | 7         | 2         | 2         | 2         | 7         | Bacteria; Actinobacteria; Actinobacteria; Actinomycetales                                                             |
| Otu1469 | 2       | 1       | 5       | 9        | 8       | 26       | 12        | 14        | 18        | 3         | 2         | 2         | Bacteria; Acidobacteria; Solibacteres; Solibacterales; Solibacteraceae; Candidatus_Solibacter                         |
| Otu1464 | 13      | 0       | 0       | 4        | 2       | 19       | 0         | 1         | 0         | 0         | 0         | 4         | Bacteria; Proteobacteria; Deltaproteobacteria; Myxococcales                                                           |
| Otu1465 | 0       | 0       | 0       | 0        | 0       | 0        | 9         | 0         | 0         | 0         | 0         | 0         | Bacteria; Proteobacteria; Gammaproteobacteria; Pasteurellales; Pasteurellaceae; Haemophilus; Haemophilus_painfluenzae |



| #OTU ID | Z31DRh1 | Z31DRh2 | Z31DRh3 | Z31DRh4r | Z31DRh5 | Z31DRh6r | Z31J1DRh1 | Z31J1DRh2 | Z31J1DRh3 | Z31J1DRh4 | Z31J1DRh5 | Z31J1DRh6 | taxonomy                                                                                          |
|---------|---------|---------|---------|----------|---------|----------|-----------|-----------|-----------|-----------|-----------|-----------|---------------------------------------------------------------------------------------------------|
| Otu1466 | 2       | 2       | 4       | 3        | 3       | 10       | 7         | 13        | 8         | 10        | 5         | 3         | Bacteria; Armatimonadetes; Armatimonadia; FW68                                                    |
| Otu1467 | 2       | 2       | 1       | 3        | 0       | 7        | 0         | 0         | 1         | 4         | 8         | 1         | Bacteria                                                                                          |
| Otu1460 | 0       | 1       | 1       | 0        | 0       | 16       | 0         | 3         | 0         | 0         | 0         | 1         | Bacteria; Chloroflexi                                                                             |
| Otu1461 | 0       | 5       | 0       | 2        | 0       | 0        | 0         | 0         | 0         | 0         | 0         | 0         | Bacteria; Planctomycetes; Planctomycetia; Pirellulales; Pirellulaceae                             |
| Otu1462 | 7       | 0       | 0       | 0        | 0       | 0        | 0         | 0         | 0         | 0         | 0         | 0         | Bacteria; OD1; ZB2                                                                                |
| Otu1463 | 0       | 1       | 1       | 1        | 0       | 6        | 0         | 2         | 2         | 0         | 0         | 1         | Bacteria; Chloroflexi; C0119                                                                      |
| Otu3183 | 0       | 1       | 0       | 1        | 1       | 2        | 2         | 0         | 0         | 3         | 2         | 0         | Bacteria; Actinobacteria; Acidimicrobia; Acidimicrobiales; EB1017                                 |
| Otu3177 | 0       | 0       | 0       | 0        | 2       | 3        | 0         | 0         | 1         | 0         | 0         | 0         | Bacteria; Firmicutes; Clostridia; OPB54                                                           |
| Otu4359 | 2       | 0       | 0       | 2        | 0       | 0        | 1         | 0         | 0         | 0         | 0         | 0         | Bacteria; Armatimonadetes; Armatimonadia; Armatimonadales; Armatimonadaceae                       |
| Otu3916 | 1       | 2       | 2       | 2        | 0       | 1        | 2         | 0         | 3         | 0         | 1         | 2         | Bacteria; Planctomycetes; Planctomycetia; Planctomycetales; Planctomycetaceae; Planctomyces       |
| Otu2814 | 0       | 2       | 0       | 0        | 0       | 2        | 0         | 0         | 0         | 0         | 0         | 0         | Bacteria; Verrucomicrobia; Spartobacteria; Chthoniobacteriales; Chthoniobacteraceae; heteroC45_4W |
| Otu2815 | 0       | 0       | 1       | 2        | 0       | 1        | 0         | 1         | 0         | 0         | 0         | 0         | Bacteria; Proteobacteria; Betaproteobacteria                                                      |
| Otu2816 | 1       | 3       | 0       | 0        | 2       | 0        | 1         | 0         | 0         | 1         | 1         | 0         | Bacteria; Proteobacteria; Gammaproteobacteria; Legionellales; Coxiellaceae; Aquicella             |
| Otu2817 | 5       | 1       | 7       | 17       | 3       | 5        | 2         | 5         | 5         | 6         | 1         | 1         | Bacteria; Chloroflexi; TK10; AKYG885; Dolo_23                                                     |
| Otu2810 | 1       | 1       | 0       | 0        | 1       | 3        | 2         | 3         | 0         | 0         | 3         | 0         | Bacteria; Chloroflexi; Anaerolineae; A31                                                          |
| Otu2811 | 0       | 1       | 2       | 3        | 1       | 2        | 0         | 0         | 0         | 0         | 0         | 1         | Bacteria; Proteobacteria; Gammaproteobacteria                                                     |
| Otu2812 | 0       | 7       | 0       | 2        | 0       | 3        | 3         | 2         | 2         | 0         | 2         | 1         | Bacteria; Planctomycetes; Planctomycetia; Gemmatales; Gemmataceae                                 |
| Otu2813 | 0       | 0       | 2       | 0        | 0       | 0        | 0         | 0         | 0         | 0         | 0         | 0         | Bacteria; Proteobacteria; Gammaproteobacteria; Legionellales; Coxiellaceae                        |
| Otu3435 | 0       | 1       | 0       | 3        | 3       | 2        | 1         | 1         | 0         | 0         | 2         | 0         | Bacteria; Proteobacteria; Deltaproteobacteria; Myxococcales                                       |
| Otu3434 | 10      | 3       | 2       | 3        | 8       | 10       | 4         | 5         | 7         | 3         | 7         | 2         | Bacteria; Proteobacteria; Deltaproteobacteria; Myxococcales; Polyangiaceae                        |
| Otu3437 | 84      | 51      | 52      | 124      | 32      | 199      | 73        | 76        | 41        | 52        | 29        | 58        | Bacteria; Proteobacteria; Alphaproteobacteria; Ellin329                                           |
| Otu3436 | 0       | 4       | 0       | 1        | 0       | 2        | 4         | 0         | 0         | 0         | 0         | 0         | Bacteria; Proteobacteria; Deltaproteobacteria                                                     |

| #OTU ID | Z31DRh1 | Z31DRh2 | Z31DRh3 | Z31DRh4r | Z31DRh5 | Z31DRh6r | Z31J1DRh1 | Z31J1DRh2 | Z31J1DRh3 | Z31J1DRh4 | Z31J1DRh5 | Z31J1DRh6 | taxonomy                                                                                      |
|---------|---------|---------|---------|----------|---------|----------|-----------|-----------|-----------|-----------|-----------|-----------|-----------------------------------------------------------------------------------------------|
| Otu2818 | 0       | 2       | 0       | 0        | 0       | 0        | 0         | 0         | 0         | 0         | 0         | 0         | Bacteria                                                                                      |
| Otu2819 | 0       | 0       | 0       | 0        | 1       | 1        | 0         | 0         | 0         | 2         | 1         | 0         | Bacteria                                                                                      |
| Otu3433 | 0       | 0       | 0       | 0        | 0       | 0        | 2         | 0         | 0         | 0         | 0         | 0         | Bacteria                                                                                      |
| Otu3432 | 2       | 3       | 2       | 11       | 11      | 22       | 10        | 0         | 0         | 12        | 5         | 4         | Bacteria; Proteobacteria; Gammaproteobacteria; Xanthomonadales; Sinobacteraceae               |
| Otu3182 | 0       | 2       | 1       | 0        | 0       | 0        | 0         | 0         | 0         | 1         | 0         | 0         | Bacteria; Proteobacteria; Deltaproteobacteria; Myxococcales                                   |
| Otu4262 | 0       | 0       | 0       | 0        | 2       | 0        | 0         | 1         | 0         | 1         | 0         | 0         | Bacteria; Chlamydiae; Chlamydia; Chlamydiales; Parachlamydiaceae; Candidatus_Proteochlamydia  |
| Otu4428 | 0       | 0       | 1       | 0        | 0       | 2        | 1         | 0         | 0         | 1         | 0         | 0         | Bacteria; Planctomycetes; Planctomycetia; Gemmatales; Isosphaeraceae                          |
| Otu4358 | 0       | 0       | 1       | 0        | 3       | 1        | 0         | 0         | 0         | 0         | 2         | 0         | Bacteria; OP3; PBS-25                                                                         |
| Otu4433 | 16      | 42      | 11      | 5        | 3       | 15       | 2         | 4         | 4         | 6         | 3         | 4         | Bacteria; Proteobacteria; Deltaproteobacteria; Myxococcales                                   |
| Otu1598 | 8       | 13      | 9       | 26       | 8       | 10       | 4         | 6         | 10        | 1         | 3         | 2         | Bacteria; Verrucomicrobia; Opiritae; Opiritales; Opiritaceae                                  |
| Otu1599 | 2       | 10      | 13      | 10       | 0       | 14       | 10        | 8         | 7         | 7         | 4         | 1         | Bacteria; Actinobacteria; Thermoleophilia; Solirubrobacterales                                |
| Otu1590 | 0       | 0       | 0       | 0        | 0       | 8        | 0         | 0         | 0         | 0         | 0         | 0         | Bacteria; Chloroflexi; Chloroflexi; Roseiflexales                                             |
| Otu1591 | 0       | 1       | 0       | 0        | 1       | 5        | 6         | 9         | 5         | 0         | 1         | 0         | Bacteria; Verrucomicrobia; Pedosphaerae; Pedosphaerales; Ellin515                             |
| Otu1592 | 0       | 5       | 1       | 5        | 2       | 3        | 2         | 1         | 0         | 0         | 1         | 0         | Bacteria; Planctomycetes; Phycisphaerae; Phycisphaerales                                      |
| Otu1593 | 6       | 2       | 4       | 8        | 2       | 5        | 2         | 2         | 2         | 1         | 3         | 1         | Bacteria; Chloroflexi; C0119                                                                  |
| Otu1594 | 2       | 2       | 0       | 0        | 0       | 3        | 0         | 6         | 1         | 1         | 0         | 0         | Bacteria; Proteobacteria; Alphaproteobacteria                                                 |
| Otu1595 | 3       | 8       | 2       | 8        | 5       | 4        | 2         | 1         | 3         | 2         | 11        | 1         | Bacteria; Proteobacteria; Deltaproteobacteria; NB1-j                                          |
| Otu1596 | 3       | 11      | 0       | 6        | 4       | 8        | 6         | 3         | 0         | 9         | 8         | 2         | Bacteria; Gemmatimonadetes; Gemmatimonadetes; Ellin5290                                       |
| Otu1597 | 2       | 8       | 1       | 9        | 7       | 4        | 11        | 5         | 1         | 6         | 14        | 4         | Bacteria; Actinobacteria; Thermoleophilia; Gaiellales; Gaiellaceae                            |
| Otu4227 | 1       | 0       | 0       | 0        | 0       | 2        | 0         | 0         | 0         | 0         | 0         | 0         | Bacteria; Firmicutes; Clostridia; OPB54                                                       |
| Otu3760 | 0       | 0       | 0       | 2        | 0       | 0        | 0         | 0         | 0         | 0         | 0         | 0         | Bacteria; Firmicutes; Clostridia; Clostridiales; Lachnospiraceae; Roseburia; Roseburia_faecis |
| Otu3509 | 0       | 2       | 1       | 1        | 2       | 0        | 0         | 0         | 0         | 2         | 0         | 0         | Bacteria; Bacteroidetes                                                                       |

| #OTU ID | Z31DRh1 | Z31DRh2 | Z31DRh3 | Z31DRh4r | Z31DRh5 | Z31DRh6r | Z31J1DRh1 | Z31J1DRh2 | Z31J1DRh3 | Z31J1DRh4 | Z31J1DRh5 | Z31J1DRh6 | taxonomy                                                                                                                  |
|---------|---------|---------|---------|----------|---------|----------|-----------|-----------|-----------|-----------|-----------|-----------|---------------------------------------------------------------------------------------------------------------------------|
| Otu3508 | 0       | 0       | 1       | 0        | 0       | 0        | 2         | 0         | 1         | 0         | 1         | 0         | Bacteria; Acidobacteria; Solibacteres; Solibacterales; AKIW659                                                            |
| Otu3501 | 0       | 2       | 0       | 0        | 0       | 1        | 2         | 0         | 0         | 0         | 1         | 0         | Bacteria; Planctomycetes; Phycisphaerae; Phycisphaerales                                                                  |
| Otu3500 | 0       | 1       | 0       | 0        | 0       | 2        | 0         | 0         | 0         | 0         | 0         | 0         | Bacteria; Proteobacteria; Deltaproteobacteria; Myxococcales; OM27                                                         |
| Otu3503 | 0       | 0       | 0       | 0        | 0       | 0        | 0         | 0         | 0         | 0         | 0         | 2         | Bacteria                                                                                                                  |
| Otu3502 | 0       | 0       | 1       | 0        | 0       | 0        | 0         | 0         | 0         | 13        | 0         | 4         | Bacteria; Proteobacteria                                                                                                  |
| Otu3505 | 0       | 0       | 0       | 0        | 1       | 0        | 0         | 0         | 0         | 0         | 2         | 0         | Bacteria; Bacteroidetes; Sphingobacteriia; Sphingobacteriales                                                             |
| Otu3504 | 0       | 1       | 0       | 0        | 0       | 0        | 0         | 0         | 0         | 0         | 2         | 0         | Bacteria; Proteobacteria; Deltaproteobacteria; Myxococcales                                                               |
| Otu3507 | 0       | 2       | 0       | 0        | 0       | 2        | 0         | 0         | 0         | 0         | 0         | 0         | Bacteria; Proteobacteria; Alphaproteobacteria; BD7-3                                                                      |
| Otu3506 | 0       | 0       | 1       | 1        | 0       | 0        | 0         | 5         | 2         | 4         | 2         | 1         | Bacteria; Proteobacteria; Gammaproteobacteria; Legionellales; Coxiellaceae; Aquicella                                     |
| Otu1042 | 14      | 27      | 20      | 33       | 35      | 115      | 26        | 52        | 31        | 46        | 39        | 29        | Bacteria; Acidobacteria; Acidobacteriia; Acidobacteriales; Koribacteraceae                                                |
| Otu1043 | 3       | 3       | 6       | 1        | 3       | 8        | 2         | 8         | 9         | 9         | 17        | 7         | Bacteria; Bacteroidetes; Sphingobacteriia; Sphingobacteriales                                                             |
| Otu529  | 0       | 0       | 12      | 32       | 5       | 0        | 0         | 0         | 0         | 0         | 0         | 0         | Bacteria; Bacteroidetes; Saprospirae; Saprospirales; Chitinophagaceae                                                     |
| Otu528  | 44      | 13      | 9       | 18       | 12      | 31       | 16        | 8         | 8         | 4         | 24        | 10        | Bacteria; Proteobacteria; Gammaproteobacteria; Xanthomonadales; Xanthomonadaceae                                          |
| Otu1046 | 0       | 9       | 2       | 0        | 0       | 0        | 0         | 0         | 0         | 0         | 0         | 0         | Bacteria; Acidobacteria; Solibacteres; JH-WHS99                                                                           |
| Otu1047 | 4       | 0       | 11      | 6        | 0       | 5        | 9         | 5         | 0         | 0         | 0         | 2         | Bacteria; Proteobacteria; Gammaproteobacteria; Pseudomonadales; Moraxellaceae; Acinetobacter; Acinetobacter_rhizosphaerae |
| Otu1044 | 1       | 1       | 1       | 1        | 0       | 12       | 0         | 1         | 4         | 4         | 2         | 2         | Bacteria; Bacteroidetes; Saprospirae; Saprospirales                                                                       |
| Otu1045 | 10      | 6       | 4       | 11       | 7       | 12       | 14        | 7         | 12        | 8         | 12        | 2         | Bacteria; Gemmatimonadetes; Gemmatimonadetes; Ellin5290                                                                   |
| Otu523  | 2       | 1       | 3       | 7        | 3       | 10       | 4         | 32        | 7         | 11        | 6         | 7         | Bacteria; Gemmatimonadetes; Gemmatimonadetes                                                                              |
| Otu522  | 3       | 26      | 4       | 2        | 15      | 20       | 30        | 2         | 4         | 14        | 34        | 3         | Bacteria; Proteobacteria; Betaproteobacteria; MND1                                                                        |
| Otu521  | 10      | 6       | 15      | 14       | 4       | 32       | 1         | 6         | 7         | 5         | 2         | 8         | Bacteria; Planctomycetes; Phycisphaerae; WD2101                                                                           |
| Otu520  | 31      | 32      | 26      | 55       | 23      | 42       | 32        | 29        | 15        | 14        | 29        | 28        | Bacteria; Proteobacteria; Alphaproteobacteria; Rhizobiales; Hyphomicrobiaceae; Rhodoplans                                 |
| Otu527  | 10      | 5       | 21      | 52       | 12      | 13       | 15        | 20        | 28        | 0         | 3         | 9         | Bacteria; Verrucomicrobia; Spartobacteria; Chthoniobacteriales; Chthoniobacteraceae                                       |

| #OTU ID | Z31DRh1 | Z31DRh2 | Z31DRh3 | Z31DRh4r | Z31DRh5 | Z31DRh6r | Z31J1DRh1 | Z31J1DRh2 | Z31J1DRh3 | Z31J1DRh4 | Z31J1DRh5 | Z31J1DRh6 | taxonomy                                                                                     |
|---------|---------|---------|---------|----------|---------|----------|-----------|-----------|-----------|-----------|-----------|-----------|----------------------------------------------------------------------------------------------|
| Otu526  | 4       | 1       | 7       | 5        | 3       | 2        | 6         | 7         | 4         | 35        | 8         | 15        | Bacteria; Gemmatimonadetes; Gemm-3                                                           |
| Otu525  | 91      | 40      | 203     | 1037     | 136     | 494      | 168       | 82        | 15        | 13        | 6         | 99        | Bacteria; Proteobacteria; Gammaproteobacteria; Enterobacteriales; Enterobacteriaceae         |
| Otu524  | 12      | 10      | 15      | 6        | 17      | 22       | 12        | 25        | 10        | 37        | 16        | 10        | Bacteria; Verrucomicrobia; Spartobacteria; Chthoniobacteriales; Chthoniobacteraceae; DA101   |
| Otu1284 | 7       | 7       | 2       | 8        | 5       | 2        | 3         | 9         | 6         | 2         | 5         | 2         | Bacteria; Proteobacteria; Alphaproteobacteria; Rhizobiales                                   |
| Otu1285 | 3       | 6       | 3       | 10       | 0       | 4        | 2         | 2         | 0         | 1         | 4         | 1         | Bacteria; Proteobacteria; Deltaproteobacteria; Myxococcales                                  |
| Otu1286 | 3       | 1       | 0       | 0        | 5       | 9        | 2         | 0         | 0         | 4         | 1         | 0         | Bacteria; Bacteroidetes; Sphingobacteriia; Sphingobacteriales                                |
| Otu1287 | 0       | 0       | 1       | 9        | 0       | 4        | 0         | 0         | 6         | 5         | 0         | 5         | Bacteria; TM6; SJA-4                                                                         |
| Otu1280 | 1       | 4       | 1       | 0        | 3       | 2        | 2         | 6         | 2         | 5         | 3         | 1         | Bacteria; Proteobacteria; Deltaproteobacteria                                                |
| Otu1281 | 0       | 9       | 3       | 3        | 9       | 2        | 3         | 0         | 0         | 8         | 1         | 2         | Bacteria; WS3; PRR-12; Sediment-1                                                            |
| Otu1282 | 1       | 8       | 0       | 6        | 2       | 1        | 2         | 1         | 1         | 1         | 3         | 1         | Bacteria; Chloroflexi; Anaerolineae; GCA004                                                  |
| Otu1283 | 0       | 3       | 1       | 4        | 1       | 7        | 4         | 2         | 1         | 3         | 0         | 1         | Bacteria; Elusimicrobia; Elusimicrobia; FAC88                                                |
| Otu3264 | 681     | 425     | 636     | 1043     | 414     | 502      | 1488      | 368       | 647       | 1985      | 462       | 652       | Bacteria; Proteobacteria; Betaproteobacteria; Burkholderiales; Comamonadaceae                |
| Otu1288 | 0       | 9       | 4       | 6        | 5       | 4        | 0         | 5         | 0         | 0         | 2         | 4         | Bacteria; Verrucomicrobia; Spartobacteria; Chthoniobacteriales; Chthoniobacteraceae; OR-59   |
| Otu1289 | 2       | 0       | 1       | 5        | 1       | 10       | 2         | 1         | 0         | 1         | 0         | 1         | Bacteria; Armatimonadetes; Armatimonadia; Armatimonadales; Armatimonadaceae                  |
| Otu3265 | 0       | 0       | 0       | 0        | 0       | 0        | 2         | 0         | 0         | 0         | 0         | 0         | Bacteria; Verrucomicrobia; Pedosphaerae                                                      |
| Otu2588 | 0       | 0       | 3       | 1        | 0       | 0        | 0         | 0         | 0         | 0         | 0         | 0         | Bacteria; OD1; ZB2                                                                           |
| Otu2589 | 3       | 0       | 1       | 2        | 0       | 1        | 0         | 0         | 0         | 0         | 0         | 0         | Bacteria; Verrucomicrobia; Spartobacteria; Chthoniobacteriales; Chthoniobacteraceae; OR-59   |
| Otu2582 | 0       | 0       | 0       | 0        | 0       | 0        | 3         | 0         | 0         | 0         | 0         | 0         | Bacteria                                                                                     |
| Otu2583 | 5       | 0       | 0       | 0        | 0       | 2        | 0         | 3         | 1         | 2         | 0         | 0         | Bacteria; Acidobacteria; Acidobacteriia; Acidobacteriales                                    |
| Otu2580 | 0       | 0       | 18      | 1        | 0       | 0        | 0         | 0         | 0         | 0         | 0         | 0         | Bacteria; Bacteroidetes; Sphingobacteriia; Sphingobacteriales                                |
| Otu2581 | 3       | 0       | 0       | 0        | 0       | 0        | 0         | 0         | 0         | 0         | 0         | 0         | Bacteria; Proteobacteria; Alphaproteobacteria; Rhizobiales; Hyphomicrobiaceae; Pedomicrobium |
| Otu2586 | 0       | 0       | 0       | 0        | 0       | 3        | 0         | 0         | 0         | 0         | 0         | 0         | Bacteria; Actinobacteria                                                                     |

| #OTU ID | Z31DRh1 | Z31DRh2 | Z31DRh3 | Z31DRh4r | Z31DRh5 | Z31DRh6r | Z31J1DRh1 | Z31J1DRh2 | Z31J1DRh3 | Z31J1DRh4 | Z31J1DRh5 | Z31J1DRh6 | taxonomy                                                                          |
|---------|---------|---------|---------|----------|---------|----------|-----------|-----------|-----------|-----------|-----------|-----------|-----------------------------------------------------------------------------------|
| Otu2587 | 2       | 0       | 4       | 6        | 0       | 3        | 1         | 3         | 0         | 0         | 0         | 0         | Bacteria; Actinobacteria                                                          |
| Otu2584 | 2       | 0       | 0       | 0        | 0       | 3        | 0         | 0         | 0         | 0         | 0         | 0         | Bacteria; Proteobacteria; Betaproteobacteria; Nitrosomonadales; Nitrosomonadaceae |
| Otu2585 | 523     | 233     | 602     | 1086     | 600     | 370      | 475       | 100       | 371       | 1147      | 108       | 375       | Bacteria; Proteobacteria; Betaproteobacteria; Burkholderiales                     |
| Otu3615 | 0       | 0       | 2       | 0        | 0       | 0        | 0         | 0         | 0         | 0         | 0         | 0         | Bacteria; Actinobacteria; Actinobacteria; Actinomycetales                         |
| Otu3268 | 0       | 0       | 0       | 2        | 0       | 0        | 0         | 2         | 0         | 0         | 3         | 0         | Bacteria; Chloroflexi; Anaerolineae; A31                                          |
| Otu3617 | 1       | 0       | 3       | 0        | 0       | 0        | 0         | 0         | 0         | 0         | 0         | 0         | Bacteria                                                                          |
| Otu3616 | 0       | 0       | 1       | 0        | 2       | 1        | 3         | 0         | 0         | 0         | 0         | 0         | Bacteria                                                                          |
| Otu2748 | 0       | 0       | 0       | 0        | 0       | 0        | 0         | 0         | 2         | 0         | 0         | 0         | Bacteria; Thermi; Deinococci; Deinococcales; Deinococcaceae; Deinococcus          |
| Otu2749 | 0       | 1       | 0       | 1        | 0       | 0        | 2         | 0         | 0         | 0         | 0         | 0         | Bacteria; Actinobacteria; Thermoleophilia; Solirubrobacterales                    |
| Otu3613 | 0       | 0       | 0       | 0        | 0       | 0        | 0         | 0         | 0         | 3         | 0         | 0         | Bacteria                                                                          |
| Otu3269 | 0       | 0       | 0       | 0        | 0       | 2        | 0         | 0         | 0         | 0         | 0         | 0         | Bacteria; Armatimonadetes; Armatimonadia; Armatimonadales; Armatimonadaceae       |
| Otu2744 | 0       | 0       | 0       | 0        | 0       | 3        | 0         | 0         | 0         | 0         | 0         | 0         | Bacteria; Cyanobacteria; Chloroplast                                              |
| Otu2745 | 0       | 0       | 0       | 1        | 0       | 0        | 0         | 0         | 1         | 2         | 0         | 0         | Bacteria; Elusimicrobia; Elusimicrobia; Elusimicrobiales                          |
| Otu2746 | 0       | 1       | 0       | 2        | 0       | 0        | 2         | 1         | 2         | 0         | 1         | 0         | Bacteria; Acidobacteria; Acidobacteria-6                                          |
| Otu2747 | 0       | 1       | 1       | 0        | 3       | 3        | 1         | 1         | 1         | 1         | 0         | 1         | Bacteria; Proteobacteria; Deltaproteobacteria; Myxococcales; Cystobacterineae     |
| Otu2740 | 2       | 2       | 0       | 2        | 1       | 6        | 2         | 2         | 5         | 2         | 4         | 0         | Bacteria; Proteobacteria; Gammaproteobacteria; Legionellales                      |
| Otu2741 | 0       | 0       | 0       | 0        | 2       | 0        | 0         | 0         | 0         | 0         | 0         | 0         | Bacteria; Actinobacteria; Acidimicrobia; Acidimicrobiales; EB1017                 |
| Otu2742 | 2       | 2       | 1       | 3        | 3       | 4        | 4         | 1         | 0         | 2         | 0         | 0         | Bacteria; Proteobacteria; Deltaproteobacteria; MIZ46                              |
| Otu2743 | 0       | 0       | 0       | 0        | 0       | 2        | 0         | 0         | 0         | 0         | 0         | 0         | Bacteria                                                                          |
| Otu417  | 7       | 5       | 6       | 42       | 5       | 6        | 2         | 4         | 2         | 0         | 3         | 2         | Bacteria; Armatimonadetes; Armatimonadia; Armatimonadales; Armatimonadaceae       |
| Otu416  | 18      | 60      | 19      | 64       | 34      | 46       | 21        | 11        | 10        | 26        | 39        | 6         | Bacteria; Armatimonadetes; Chthonomonadetes; SJA-22                               |
| Otu415  | 12      | 24      | 19      | 44       | 7       | 1        | 30        | 5         | 34        | 70        | 1         | 109       | Bacteria; Firmicutes; Bacilli; Bacillales; Paenibacillaceae                       |

| #OTU ID | Z31DRh1 | Z31DRh2 | Z31DRh3 | Z31DRh4r | Z31DRh5 | Z31DRh6r | Z31J1DRh1 | Z31J1DRh2 | Z31J1DRh3 | Z31J1DRh4 | Z31J1DRh5 | Z31J1DRh6 | taxonomy                                                                                          |
|---------|---------|---------|---------|----------|---------|----------|-----------|-----------|-----------|-----------|-----------|-----------|---------------------------------------------------------------------------------------------------|
| Otu414  | 0       | 4       | 3       | 37       | 1       | 2        | 2         | 0         | 5         | 0         | 0         | 4         | Bacteria; Bacteroidetes                                                                           |
| Otu413  | 0       | 0       | 3       | 5        | 17      | 10       | 15        | 40        | 23        | 42        | 19        | 33        | Bacteria; Proteobacteria; Gammaproteobacteria; Legionellales                                      |
| Otu412  | 34      | 49      | 42      | 70       | 23      | 42       | 36        | 16        | 24        | 50        | 48        | 21        | Bacteria; Acidobacteria; Solibacteres; Solibacterales                                             |
| Otu411  | 42      | 5       | 0       | 2        | 13      | 23       | 0         | 0         | 10        | 2         | 5         | 5         | Bacteria; Verrucomicrobia; Opitutae; Opitutales; Opitutaceae; Opitutus                            |
| Otu410  | 25      | 32      | 15      | 24       | 17      | 30       | 16        | 31        | 23        | 19        | 40        | 7         | Bacteria; Proteobacteria; Deltaproteobacteria; Myxococcales                                       |
| Otu4230 | 6       | 1       | 0       | 2        | 1       | 18       | 1         | 4         | 2         | 0         | 0         | 1         | Bacteria; Proteobacteria; Alphaproteobacteria; Rhizobiales                                        |
| Otu4393 | 0       | 0       | 0       | 0        | 0       | 2        | 0         | 0         | 0         | 1         | 4         | 0         | Bacteria; Armatimonadetes; Fimbriimonadia; Fimbriimonadales; Fimbriimonadaceae; Fimbriimonas      |
| Otu419  | 8       | 3       | 22      | 25       | 6       | 38       | 12        | 21        | 27        | 19        | 12        | 13        | Bacteria; WPS-2                                                                                   |
| Otu418  | 15      | 24      | 25      | 47       | 19      | 37       | 23        | 14        | 17        | 22        | 36        | 3         | Bacteria; Acidobacteria; Solibacteres; Solibacterales                                             |
| Otu4174 | 33      | 101     | 13      | 56       | 28      | 24       | 30        | 10        | 2         | 13        | 42        | 5         | Bacteria; Acidobacteria; Chloracidobacteria; RB41                                                 |
| Otu4357 | 0       | 0       | 0       | 0        | 4       | 0        | 0         | 0         | 0         | 0         | 2         | 0         | Bacteria; TM7; SC3                                                                                |
| Otu1138 | 9       | 10      | 3       | 9        | 0       | 0        | 6         | 1         | 2         | 5         | 3         | 1         | Bacteria; Gemmatimonadetes; Gemm-5                                                                |
| Otu1139 | 23      | 46      | 32      | 35       | 28      | 72       | 23        | 39        | 34        | 44        | 56        | 14        | Bacteria; Verrucomicrobia; Pedosphaerae; Pedosphaerales; Ellin515                                 |
| Otu1136 | 12      | 1       | 0       | 2        | 7       | 14       | 0         | 0         | 2         | 0         | 0         | 0         | Bacteria; Cyanobacteria; Nostocophycideae; Nostocales; Nostocaceae                                |
| Otu1137 | 0       | 0       | 0       | 0        | 1       | 1        | 0         | 1         | 0         | 0         | 0         | 9         | Bacteria; Firmicutes; Bacilli; Bacillales; Alicyclobacillaceae; Alicyclobacillus                  |
| Otu1134 | 7       | 1       | 3       | 1        | 1       | 0        | 1         | 1         | 0         | 1         | 4         | 0         | Bacteria; Actinobacteria; Actinobacteria; Actinomycetales                                         |
| Otu1135 | 3       | 7       | 1       | 3        | 2       | 6        | 5         | 1         | 5         | 9         | 10        | 0         | Bacteria; Proteobacteria; Alphaproteobacteria; Rhodospirillales; Rhodospirillaceae                |
| Otu1132 | 0       | 3       | 1       | 1        | 5       | 12       | 6         | 12        | 4         | 6         | 4         | 9         | Bacteria; Acidobacteria; DA052; Ellin6513                                                         |
| Otu1133 | 2       | 0       | 2       | 8        | 2       | 2        | 2         | 8         | 9         | 3         | 7         | 2         | Bacteria; Proteobacteria; Deltaproteobacteria; Myxococcales                                       |
| Otu1130 | 0       | 12      | 4       | 10       | 7       | 2        | 8         | 0         | 1         | 6         | 9         | 7         | Bacteria; Acidobacteria; Acidobacteria-5                                                          |
| Otu1131 | 0       | 0       | 0       | 0        | 0       | 0        | 0         | 7         | 0         | 0         | 0         | 0         | Bacteria; Proteobacteria; Gammaproteobacteria; Pseudomonadales; Moraxellaceae                     |
| Otu3149 | 1       | 2       | 0       | 0        | 0       | 0        | 0         | 0         | 0         | 0         | 0         | 0         | Bacteria; Cyanobacteria; Synechococcophycideae; Pseudanabaenales; Pseudanabaenaceae; Leptolyngbya |

| #OTU ID | Z31DRh1 | Z31DRh2 | Z31DRh3 | Z31DRh4r | Z31DRh5 | Z31DRh6r | Z31J1DRh1 | Z31J1DRh2 | Z31J1DRh3 | Z31J1DRh4 | Z31J1DRh5 | Z31J1DRh6 | taxonomy                                                                                                                        |
|---------|---------|---------|---------|----------|---------|----------|-----------|-----------|-----------|-----------|-----------|-----------|---------------------------------------------------------------------------------------------------------------------------------|
| Otu899  | 5       | 0       | 13      | 18       | 6       | 14       | 9         | 23        | 10        | 11        | 8         | 13        | Bacteria; Gemmatimonadetes; Gemmatimonadetes; Ellin5290                                                                         |
| Otu898  | 0       | 2       | 2       | 0        | 12      | 7        | 0         | 0         | 1         | 0         | 3         | 0         | Bacteria                                                                                                                        |
| Otu3903 | 0       | 0       | 0       | 0        | 0       | 2        | 0         | 0         | 0         | 0         | 0         | 0         | Bacteria; TM7; SC3                                                                                                              |
| Otu679  | 17      | 5       | 10      | 33       | 13      | 34       | 4         | 9         | 25        | 18        | 12        | 15        | Bacteria; Acidobacteria; Solibacteres; Solibacterales                                                                           |
| Otu678  | 10      | 0       | 0       | 1        | 22      | 0        | 0         | 0         | 0         | 0         | 0         | 0         | Bacteria; Verrucomicrobia; Verrucomicrobiae; Verrucomicrobiales; Verrucomicrobiaceae; Prosthecobacter; Prosthecobacter_debontii |
| Otu677  | 2       | 6       | 2       | 4        | 5       | 24       | 9         | 8         | 7         | 1         | 8         | 0         | Bacteria; Planctomycetes; vadinHA49; p04_C01                                                                                    |
| Otu676  | 0       | 4       | 2       | 0        | 4       | 0        | 0         | 0         | 0         | 0         | 19        | 0         | Bacteria; OD1; ABY1                                                                                                             |
| Otu675  | 4       | 24      | 3       | 5        | 14      | 5        | 8         | 1         | 0         | 5         | 5         | 0         | Bacteria; Proteobacteria; Deltaproteobacteria; Myxococcales                                                                     |
| Otu674  | 13      | 4       | 5       | 28       | 3       | 17       | 2         | 10        | 3         | 9         | 9         | 2         | Bacteria; Planctomycetes; Phycisphaerae; WD2101                                                                                 |
| Otu673  | 18      | 2       | 0       | 1        | 0       | 7        | 0         | 0         | 0         | 2         | 0         | 1         | Bacteria; Proteobacteria; Alphaproteobacteria; Sphingomonadales; Sphingomonadaceae; Sphingobium                                 |
| Otu672  | 4       | 9       | 9       | 9        | 12      | 13       | 9         | 10        | 16        | 16        | 25        | 9         | Bacteria; Bacteroidetes; Sphingobacteriia; Sphingobacteriales                                                                   |
| Otu895  | 0       | 2       | 0       | 5        | 0       | 1        | 4         | 16        | 1         | 0         | 2         | 5         | Bacteria; Proteobacteria; Gammaproteobacteria; Legionellales; Coxiellaceae                                                      |
| Otu670  | 0       | 0       | 0       | 0        | 8       | 0        | 0         | 0         | 0         | 0         | 25        | 0         | Bacteria; Bacteroidetes                                                                                                         |
| Otu2444 | 0       | 3       | 0       | 1        | 0       | 1        | 0         | 3         | 0         | 1         | 0         | 0         | Bacteria; Verrucomicrobia; Pedosphaerae; Pedosphaerales                                                                         |
| Otu389  | 14      | 112     | 15      | 51       | 42      | 90       | 71        | 63        | 25        | 19        | 60        | 25        | Bacteria; Bacteroidetes; Cytophagia; Cytophagales; Cytophagaceae                                                                |
| Otu388  | 27      | 154     | 57      | 79       | 51      | 103      | 72        | 45        | 44        | 63        | 97        | 32        | Bacteria; Acidobacteria; Acidobacteria-6; iii1-15                                                                               |
| Otu387  | 11      | 51      | 16      | 27       | 30      | 18       | 20        | 36        | 31        | 18        | 52        | 7         | Bacteria; Proteobacteria; Deltaproteobacteria; Myxococcales; Haliangiaceae                                                      |
| Otu386  | 18      | 9       | 14      | 37       | 5       | 76       | 11        | 15        | 3         | 6         | 8         | 15        | Bacteria; Verrucomicrobia; Verrucomicrobiae; Verrucomicrobiales; Verrucomicrobiaceae                                            |
| Otu385  | 40      | 100     | 34      | 81       | 66      | 39       | 34        | 17        | 16        | 29        | 29        | 26        | Bacteria; Verrucomicrobia; Opiritatae; Opiritutales; Opiritutaceae; Opiritutus                                                  |
| Otu384  | 0       | 0       | 2       | 11       | 5       | 51       | 1         | 7         | 10        | 2         | 3         | 0         | Bacteria; Chloroflexi; Ktedonobacteria                                                                                          |
| Otu383  | 29      | 57      | 16      | 31       | 14      | 49       | 12        | 7         | 2         | 4         | 16        | 3         | Bacteria; Bacteroidetes; Saprospirae; Saprospirales; Chitinophagaceae                                                           |
| Otu382  | 24      | 12      | 13      | 53       | 16      | 56       | 18        | 35        | 31        | 5         | 22        | 6         | Bacteria; Acidobacteria; Solibacteres; Solibacterales; Solibacteraceae; Candidatus_Solibacter                                   |

| #OTU ID | Z31DRh1 | Z31DRh2 | Z31DRh3 | Z31DRh4r | Z31DRh5 | Z31DRh6r | Z31J1DRh1 | Z31J1DRh2 | Z31J1DRh3 | Z31J1DRh4 | Z31J1DRh5 | Z31J1DRh6 | taxonomy                                                                                           |
|---------|---------|---------|---------|----------|---------|----------|-----------|-----------|-----------|-----------|-----------|-----------|----------------------------------------------------------------------------------------------------|
| Otu381  | 22      | 36      | 50      | 95       | 27      | 61       | 18        | 33        | 39        | 22        | 41        | 13        | Bacteria; Armatimonadetes; Chthonomonadetes; Chthonomonadales; Chthonomonadaceae                   |
| Otu380  | 8       | 10      | 9       | 14       | 18      | 88       | 21        | 100       | 31        | 20        | 33        | 31        | Bacteria; Acidobacteria; Acidobacteriia; Acidobacteriales; Koribacteraceae; Candidatus_Koribacter  |
| Otu3761 | 0       | 2       | 0       | 0        | 0       | 0        | 0         | 0         | 0         | 0         | 0         | 0         | Bacteria; Actinobacteria; MB-A2-108; 0319-7L14                                                     |
| Otu3602 | 0       | 0       | 1       | 0        | 1       | 3        | 4         | 0         | 1         | 1         | 0         | 2         | Bacteria; Proteobacteria; Deltaproteobacteria; Bdellovibrionales; Bdellovibrionaceae; Bdellovibrio |
| Otu3763 | 30      | 28      | 33      | 40       | 23      | 32       | 32        | 26        | 22        | 15        | 57        | 21        | Bacteria; Proteobacteria; Betaproteobacteria; SC-I-84                                              |
| Otu3762 | 13      | 18      | 11      | 14       | 8       | 7        | 33        | 16        | 4         | 23        | 16        | 4         | Bacteria; Acidobacteria; Acidobacteriia; Acidobacteriales; Koribacteraceae; Candidatus_Koribacter  |
| Otu3765 | 0       | 2       | 1       | 0        | 0       | 3        | 0         | 0         | 2         | 0         | 3         | 0         | Bacteria; Planctomycetes; Planctomycetia; Pirellulales; Pirellulaceae                              |
| Otu2328 | 0       | 0       | 2       | 3        | 0       | 0        | 0         | 0         | 1         | 0         | 5         | 0         | Bacteria; Proteobacteria; Gammaproteobacteria; Legionellales; Coxiellaceae                         |
| Otu3767 | 0       | 0       | 0       | 0        | 0       | 0        | 2         | 0         | 0         | 0         | 0         | 0         | Bacteria; Proteobacteria; Betaproteobacteria; MND1                                                 |
| Otu3603 | 0       | 4       | 0       | 1        | 0       | 3        | 3         | 3         | 1         | 2         | 1         | 0         | Bacteria; Acidobacteria; EC1113                                                                    |
| Otu3769 | 0       | 0       | 0       | 0        | 0       | 0        | 0         | 0         | 0         | 2         | 0         | 0         | Bacteria; Gemmatimonadetes; Gemmatimonadetes; Ellin5290                                            |
| Otu3768 | 0       | 0       | 0       | 1        | 2       | 1        | 0         | 0         | 0         | 1         | 0         | 0         | Bacteria; Chlamydiae; Chlamydiia; Chlamydiales; Parachlamydiaceae                                  |
| Otu2329 | 1       | 1       | 2       | 0        | 1       | 1        | 0         | 6         | 2         | 0         | 4         | 0         | Bacteria; Bacteroidetes; Saprospirae; Saprospirales; Chitinophagaceae; Segetibacter                |
| Otu4159 | 0       | 0       | 0       | 2        | 0       | 0        | 0         | 0         | 0         | 0         | 0         | 0         | Bacteria; Verrucomicrobia; Verrucomicrobiae; Verrucomicrobiales; Verrucomicrobiaceae; Akkermansia  |
| Otu4351 | 0       | 2       | 0       | 1        | 1       | 0        | 0         | 0         | 0         | 0         | 0         | 0         | Bacteria                                                                                           |
| Otu3908 | 0       | 0       | 0       | 0        | 0       | 0        | 2         | 0         | 0         | 0         | 0         | 0         | Bacteria; Bacteroidetes; Saprospirae; Saprospirales; Chitinophagaceae                              |
| Otu251  | 19      | 39      | 11      | 16       | 7       | 85       | 71        | 103       | 74        | 21        | 38        | 46        | Bacteria; Proteobacteria; Gammaproteobacteria                                                      |
| Otu250  | 106     | 32      | 70      | 176      | 60      | 110      | 37        | 27        | 67        | 28        | 27        | 100       | Bacteria; Proteobacteria; Alphaproteobacteria; Sphingomonadales; Sphingomonadaceae; Sphingomonas   |
| Otu253  | 13      | 22      | 2       | 28       | 11      | 87       | 9         | 8         | 16        | 6         | 7         | 2         | Bacteria; Armatimonadetes; Fimbriimonadia; Fimbriimonadales; Fimbriimonadaceae; Fimbriimonas       |
| Otu252  | 32      | 27      | 26      | 30       | 51      | 80       | 35        | 61        | 64        | 52        | 54        | 27        | Bacteria; Chloroflexi; Ktedonobacteria; JG30-KF-AS9                                                |
| Otu255  | 3       | 4       | 6       | 16       | 13      | 89       | 23        | 51        | 31        | 4         | 14        | 12        | Bacteria; Acidobacteria; Solibacteres; Solibacterales                                              |
| Otu254  | 2       | 3       | 1       | 1        | 0       | 60       | 7         | 1         | 0         | 2         | 0         | 2         | Bacteria; Proteobacteria; Gammaproteobacteria; Xanthomonadales; Xanthomonadaceae; Lysobacter       |



| #OTU ID | Z31DRh1 | Z31DRh2 | Z31DRh3 | Z31DRh4r | Z31DRh5 | Z31DRh6r | Z31J1DRh1 | Z31J1DRh2 | Z31J1DRh3 | Z31J1DRh4 | Z31J1DRh5 | Z31J1DRh6 | taxonomy                                                                                                          |
|---------|---------|---------|---------|----------|---------|----------|-----------|-----------|-----------|-----------|-----------|-----------|-------------------------------------------------------------------------------------------------------------------|
| Otu257  | 37      | 69      | 25      | 87       | 41      | 30       | 77        | 22        | 13        | 50        | 49        | 15        | Bacteria; Acidobacteria; Chloracidobacteria; 11-24                                                                |
| Otu256  | 61      | 0       | 0       | 10       | 7       | 88       | 0         | 0         | 1         | 0         | 0         | 3         | Bacteria; Bacteroidetes; Saprospirae; Saprospirales; Chitinophagaceae; Chitinophaga                               |
| Otu259  | 13      | 4       | 13      | 26       | 8       | 62       | 75        | 90        | 32        | 13        | 18        | 14        | Bacteria; Planctomycetes; Phycisphaerae; WD2101                                                                   |
| Otu258  | 19      | 32      | 18      | 44       | 38      | 45       | 25        | 37        | 26        | 30        | 77        | 7         | Bacteria; Chloroflexi; Anaerolineae; WCHB1-50                                                                     |
| Otu709  | 15      | 13      | 8       | 13       | 6       | 16       | 18        | 6         | 5         | 4         | 18        | 2         | Bacteria; Proteobacteria; Gammaproteobacteria; Xanthomonadales; Sinobacteraceae; Steroidobacter                   |
| Otu708  | 0       | 9       | 1       | 0        | 8       | 1        | 13        | 7         | 8         | 1         | 19        | 3         | Bacteria; Proteobacteria; Betaproteobacteria                                                                      |
| Otu3143 | 0       | 0       | 0       | 0        | 0       | 0        | 0         | 3         | 0         | 0         | 0         | 0         | Bacteria; Bacteroidetes; Saprospirae; Saprospirales; Chitinophagaceae                                             |
| Otu1860 | 0       | 5       | 0       | 0        | 0       | 0        | 0         | 0         | 0         | 0         | 1         | 0         | Bacteria                                                                                                          |
| Otu1861 | 0       | 0       | 0       | 0        | 0       | 0        | 0         | 0         | 0         | 0         | 4         | 0         | Bacteria; Chloroflexi; Chloroflexi; Roseiflexales                                                                 |
| Otu1862 | 2       | 0       | 1       | 3        | 4       | 10       | 0         | 0         | 1         | 0         | 1         | 4         | Bacteria; FBP                                                                                                     |
| Otu1863 | 0       | 0       | 0       | 0        | 4       | 2        | 0         | 0         | 0         | 0         | 0         | 2         | Bacteria; Proteobacteria; Deltaproteobacteria; Spirobacillales                                                    |
| Otu1864 | 0       | 3       | 0       | 2        | 4       | 3        | 1         | 1         | 0         | 0         | 1         | 0         | Bacteria; Chloroflexi; Anaerolineae; A31                                                                          |
| Otu1865 | 1       | 0       | 0       | 0        | 0       | 0        | 0         | 4         | 0         | 0         | 0         | 0         | Bacteria; Bacteroidetes; Cytophagia; Cytophagales; Cytophagaceae                                                  |
| Otu1866 | 2       | 4       | 0       | 1        | 2       | 6        | 1         | 2         | 2         | 2         | 5         | 1         | Bacteria; Planctomycetes; Planctomycetia; Pirellulales; Pirellulaceae                                             |
| Otu1867 | 8       | 2       | 0       | 5        | 2       | 5        | 1         | 0         | 0         | 2         | 0         | 2         | Bacteria; Verrucomicrobia; Spartobacteria; Chthoniobacteriales; Chthoniobacteraceae; Candidatus_Xiphinematobacter |
| Otu1868 | 0       | 4       | 3       | 4        | 6       | 4        | 7         | 2         | 2         | 5         | 3         | 4         | Bacteria; Acidobacteria; Acidobacteria-6; iii1-15                                                                 |
| Otu1869 | 4       | 11      | 9       | 10       | 10      | 15       | 9         | 7         | 7         | 1         | 9         | 0         | Bacteria; Acidobacteria; Acidobacteriia; Acidobacteriales; Koribacteraceae                                        |
| Otu4350 | 0       | 0       | 0       | 0        | 0       | 0        | 0         | 0         | 0         | 0         | 2         | 0         | Bacteria; Proteobacteria; Alphaproteobacteria                                                                     |
| Otu2323 | 0       | 2       | 0       | 1        | 1       | 0        | 0         | 0         | 0         | 0         | 2         | 3         | Bacteria; Chloroflexi; Anaerolineae; H39                                                                          |
| Otu2362 | 9       | 11      | 7       | 11       | 7       | 13       | 21        | 14        | 12        | 12        | 19        | 9         | Bacteria; Acidobacteria; Acidobacteriia; Acidobacteriales; Koribacteraceae; Candidatus_Koribacter                 |
| Otu2363 | 0       | 0       | 3       | 0        | 0       | 3        | 2         | 1         | 2         | 0         | 0         | 0         | Bacteria; Proteobacteria; Deltaproteobacteria; Myxococcales                                                       |
| Otu2360 | 0       | 2       | 0       | 0        | 0       | 0        | 0         | 0         | 0         | 2         | 3         | 0         | Bacteria; Chloroflexi; Anaerolineae; CFB-26                                                                       |

| #OTU ID | Z31DRh1 | Z31DRh2 | Z31DRh3 | Z31DRh4r | Z31DRh5 | Z31DRh6r | Z31J1DRh1 | Z31J1DRh2 | Z31J1DRh3 | Z31J1DRh4 | Z31J1DRh5 | Z31J1DRh6 | taxonomy                                                                                           |
|---------|---------|---------|---------|----------|---------|----------|-----------|-----------|-----------|-----------|-----------|-----------|----------------------------------------------------------------------------------------------------|
| Otu2361 | 1       | 3       | 0       | 2        | 3       | 2        | 3         | 0         | 1         | 3         | 9         | 2         | Bacteria; Proteobacteria; Deltaproteobacteria; Syntrophobacterales; Syntrophobacteraceae           |
| Otu2366 | 0       | 3       | 0       | 3        | 2       | 4        | 1         | 0         | 0         | 1         | 1         | 0         | Bacteria; Chloroflexi; Anaerolineae; Anaerolineales; Anaerolineaceae; Anaerolinea                  |
| Otu2367 | 7       | 12      | 3       | 5        | 47      | 21       | 6         | 16        | 11        | 10        | 11        | 3         | Bacteria; Verrucomicrobia; Spartobacteria; Chthoniobacterales; Chthoniobacteraceae; DA101          |
| Otu2364 | 2       | 2       | 0       | 0        | 3       | 2        | 0         | 0         | 0         | 1         | 1         | 1         | Bacteria                                                                                           |
| Otu2365 | 0       | 1       | 0       | 0        | 0       | 5        | 8         | 2         | 0         | 0         | 0         | 0         | Bacteria; Proteobacteria; Deltaproteobacteria; Myxococcales; Myxococcaceae; Myxococcus             |
| Otu3498 | 0       | 0       | 0       | 0        | 2       | 0        | 0         | 0         | 0         | 0         | 0         | 0         | Bacteria                                                                                           |
| Otu3496 | 0       | 0       | 0       | 2        | 0       | 0        | 0         | 0         | 0         | 0         | 0         | 0         | Bacteria                                                                                           |
| Otu2368 | 0       | 0       | 0       | 2        | 1       | 3        | 0         | 0         | 0         | 1         | 0         | 5         | Bacteria; Proteobacteria; Deltaproteobacteria; Bdellovibrionales; Bdellovibrionaceae; Bdellovibrio |
| Otu2369 | 1       | 1       | 2       | 4        | 0       | 1        | 4         | 1         | 0         | 3         | 0         | 2         | Bacteria                                                                                           |
| Otu3608 | 0       | 0       | 0       | 0        | 0       | 0        | 0         | 0         | 0         | 2         | 0         | 0         | Bacteria                                                                                           |
| Otu2564 | 46      | 138     | 32      | 79       | 73      | 79       | 137       | 116       | 100       | 106       | 144       | 34        | Bacteria; Proteobacteria; Betaproteobacteria; MND1                                                 |
| Otu2565 | 0       | 0       | 0       | 0        | 5       | 5        | 0         | 0         | 0         | 0         | 1         | 0         | Bacteria; Proteobacteria; Gammaproteobacteria; Legionellales; Legionellaceae                       |
| Otu2566 | 1       | 0       | 0       | 7        | 0       | 0        | 1         | 0         | 1         | 0         | 0         | 0         | Bacteria; Proteobacteria; Deltaproteobacteria; Bdellovibrionales; Bdellovibrionaceae; Bdellovibrio |
| Otu2567 | 2       | 0       | 0       | 0        | 0       | 4        | 0         | 0         | 1         | 0         | 0         | 0         | Bacteria; Proteobacteria; Alphaproteobacteria; Rickettsiales; mitochondria                         |
| Otu2560 | 0       | 0       | 0       | 0        | 0       | 0        | 0         | 0         | 0         | 0         | 4         | 0         | Bacteria; OD1; Mb-NB09                                                                             |
| Otu2561 | 2       | 3       | 0       | 2        | 0       | 4        | 1         | 0         | 0         | 2         | 2         | 1         | Bacteria; Bacteroidetes; Saprospirae; Saprospirales                                                |
| Otu2562 | 0       | 1       | 3       | 3        | 2       | 0        | 0         | 0         | 0         | 0         | 3         | 0         | Bacteria; Armatimonadetes; Fimbriimonadia; Fimbriimonadales; Fimbriimonadaceae                     |
| Otu2563 | 0       | 0       | 0       | 0        | 0       | 1        | 1         | 2         | 3         | 0         | 1         | 0         | Bacteria; Chlamydiae; Chlamydia; Chlamydiales                                                      |
| Otu2568 | 40      | 146     | 19      | 18       | 7       | 5        | 31        | 20        | 2         | 9         | 14        | 4         | Bacteria; Acidobacteria; Chloracidobacteria; RB41                                                  |
| Otu2569 | 0       | 0       | 0       | 1        | 1       | 5        | 0         | 0         | 1         | 0         | 1         | 0         | Bacteria; Planctomycetes; Planctomycetia; Pirellulales; Pirellulaceae                              |
| Otu3495 | 12      | 18      | 5       | 13       | 7       | 7        | 18        | 4         | 3         | 16        | 11        | 1         | Bacteria; Verrucomicrobia; Pedosphaerae; Pedosphaerales; Ellin517                                  |
| Otu3155 | 0       | 0       | 0       | 0        | 0       | 0        | 0         | 0         | 0         | 1         | 3         | 0         | Bacteria; Proteobacteria                                                                           |

| #OTU ID | Z31DRh1 | Z31DRh2 | Z31DRh3 | Z31DRh4r | Z31DRh5 | Z31DRh6r | Z31J1DRh1 | Z31J1DRh2 | Z31J1DRh3 | Z31J1DRh4 | Z31J1DRh5 | Z31J1DRh6 | taxonomy                                                                                           |
|---------|---------|---------|---------|----------|---------|----------|-----------|-----------|-----------|-----------|-----------|-----------|----------------------------------------------------------------------------------------------------|
| Otu4114 | 0       | 2       | 0       | 0        | 0       | 0        | 0         | 0         | 0         | 0         | 0         | 0         | Bacteria                                                                                           |
| Otu4396 | 0       | 3       | 0       | 3        | 1       | 5        | 0         | 0         | 1         | 0         | 2         | 0         | Bacteria; TM7; TM7-1                                                                               |
| Otu3992 | 0       | 13      | 1       | 4        | 6       | 1        | 1         | 1         | 0         | 4         | 11        | 0         | Bacteria; Chloroflexi; Anaerolineae; SBR1031; oc28                                                 |
| Otu4139 | 1       | 1       | 0       | 0        | 5       | 8        | 0         | 1         | 0         | 4         | 4         | 2         | Bacteria; Chloroflexi; Ktedonobacteria; Ktedonobacteriales; Ktedonobacteraceae                     |
| Otu3350 | 3       | 0       | 1       | 2        | 2       | 0        | 0         | 2         | 1         | 0         | 1         | 5         | Bacteria; TM7; TM7-3; EW055                                                                        |
| Otu2325 | 0       | 0       | 2       | 1        | 1       | 0        | 0         | 3         | 0         | 1         | 3         | 1         | Bacteria; Actinobacteria; Acidimicrobia; Acidimicrobiales                                          |
| Otu3352 | 0       | 0       | 0       | 0        | 0       | 0        | 0         | 2         | 1         | 0         | 0         | 0         | Bacteria; Proteobacteria                                                                           |
| Otu3353 | 0       | 0       | 0       | 0        | 0       | 3        | 0         | 0         | 4         | 0         | 2         | 0         | Bacteria; Verrucomicrobia; Pedosphaerae; Pedosphaerales                                            |
| Otu1918 | 1       | 2       | 1       | 1        | 6       | 1        | 2         | 1         | 0         | 2         | 4         | 0         | Bacteria; Proteobacteria; Deltaproteobacteria; Bdellovibrionales; Bdellovibrionaceae; Bdellovibrio |
| Otu1919 | 0       | 0       | 1       | 6        | 0       | 0        | 0         | 1         | 0         | 0         | 0         | 0         | Bacteria                                                                                           |
| Otu3356 | 0       | 2       | 2       | 0        | 1       | 3        | 0         | 1         | 2         | 1         | 1         | 0         | Bacteria                                                                                           |
| Otu3357 | 0       | 2       | 0       | 0        | 0       | 0        | 4         | 0         | 0         | 1         | 0         | 0         | Bacteria; Proteobacteria; Gammaproteobacteria; Legionellales; Coxiellaceae; Aquicella              |
| Otu1914 | 1       | 0       | 2       | 3        | 0       | 0        | 2         | 7         | 0         | 0         | 0         | 0         | Bacteria; Proteobacteria; Gammaproteobacteria; Xanthomonadales; Sinobacteraceae; Steroidobacter    |
| Otu1915 | 7       | 21      | 8       | 9        | 14      | 3        | 2         | 0         | 1         | 8         | 9         | 0         | Bacteria; Bacteroidetes; Saprospirae; Saprospirales; Chitinophagaceae                              |
| Otu1916 | 0       | 0       | 1       | 2        | 0       | 9        | 2         | 2         | 3         | 1         | 1         | 0         | Bacteria; Gemmatimonadetes; Gemmatimonadetes; N1423WL                                              |
| Otu1917 | 1       | 0       | 1       | 3        | 4       | 0        | 2         | 0         | 2         | 0         | 0         | 0         | Bacteria; Bacteroidetes; Saprospirae; Saprospirales; Chitinophagaceae                              |
| Otu1910 | 6       | 0       | 0       | 0        | 0       | 0        | 0         | 0         | 0         | 0         | 0         | 0         | Bacteria; Bacteroidetes; Saprospirae; Saprospirales                                                |
| Otu1911 | 0       | 2       | 2       | 5        | 0       | 9        | 1         | 6         | 0         | 1         | 2         | 0         | Bacteria; Planctomycetes; Planctomycetia; Gemmatales; Gemmataceae; Gemmata                         |
| Otu1912 | 2       | 0       | 0       | 0        | 5       | 3        | 3         | 4         | 0         | 5         | 1         | 4         | Bacteria; Chloroflexi; Ktedonobacteria; JG30-KF-AS9                                                |
| Otu1913 | 0       | 3       | 0       | 0        | 0       | 4        | 1         | 3         | 0         | 1         | 1         | 0         | Bacteria; OD1; ABY1                                                                                |
| Otu875  | 8       | 20      | 15      | 21       | 8       | 17       | 22        | 13        | 3         | 9         | 24        | 2         | Bacteria; Chloroflexi; Anaerolineae; GCA004                                                        |
| Otu874  | 3       | 16      | 0       | 0        | 0       | 0        | 0         | 0         | 0         | 0         | 0         | 0         | Bacteria; Bacteroidetes; Sphingobacteria; Sphingobacteriales                                       |

| #OTU ID | Z31DRh1 | Z31DRh2 | Z31DRh3 | Z31DRh4r | Z31DRh5 | Z31DRh6r | Z31J1DRh1 | Z31J1DRh2 | Z31J1DRh3 | Z31J1DRh4 | Z31J1DRh5 | Z31J1DRh6 | taxonomy                                                                          |
|---------|---------|---------|---------|----------|---------|----------|-----------|-----------|-----------|-----------|-----------|-----------|-----------------------------------------------------------------------------------|
| Otu877  | 0       | 21      | 12      | 4        | 12      | 3        | 9         | 0         | 0         | 11        | 23        | 0         | Bacteria; Chloroflexi; Anaerolineae; SBR1031; A4b                                 |
| Otu876  | 1       | 0       | 1       | 15       | 0       | 1        | 0         | 0         | 0         | 0         | 1         | 0         | Bacteria; Chlamydiae; Chlamydia; Chlamydiales                                     |
| Otu871  | 11      | 1       | 1       | 0        | 2       | 17       | 3         | 5         | 0         | 0         | 5         | 0         | Bacteria; Bacteroidetes; VC2_1_Bac22                                              |
| Otu870  | 0       | 16      | 0       | 0        | 0       | 0        | 1         | 0         | 0         | 0         | 1         | 0         | Bacteria; Proteobacteria; Alphaproteobacteria; Rhodospirillales                   |
| Otu873  | 9       | 21      | 28      | 35       | 19      | 26       | 21        | 25        | 29        | 15        | 25        | 18        | Bacteria; Proteobacteria; Deltaproteobacteria; Myxococcales; Polyangiaceae        |
| Otu872  | 1       | 15      | 8       | 9        | 9       | 21       | 7         | 8         | 4         | 3         | 8         | 2         | Bacteria; Chloroflexi; Anaerolineae; SBR1031; oc28                                |
| Otu3198 | 0       | 1       | 3       | 1        | 0       | 2        | 2         | 1         | 2         | 0         | 2         | 1         | Bacteria; Armatimonadetes; Chthonomonadetes; Chthonomonadales                     |
| Otu3199 | 1       | 0       | 0       | 4        | 0       | 1        | 0         | 0         | 3         | 0         | 1         | 0         | Bacteria; Bacteroidetes; Cytophagia; Cytophagales; Cytophagaceae; Hymenobacter    |
| Otu879  | 7       | 14      | 3       | 17       | 6       | 20       | 0         | 1         | 0         | 1         | 9         | 0         | Bacteria; Chloroflexi; Anaerolineae; SBR1031; oc28                                |
| Otu878  | 1       | 6       | 1       | 4        | 11      | 25       | 11        | 14        | 8         | 10        | 13        | 2         | Bacteria; Elusimicrobia; Elusimicrobia; IIb                                       |
| Otu2322 | 0       | 2       | 0       | 2        | 1       | 1        | 0         | 0         | 3         | 3         | 0         | 0         | Bacteria; Planctomycetes; Phycisphaerae; Phycisphaerales                          |
| Otu3429 | 1       | 0       | 1       | 2        | 0       | 0        | 0         | 2         | 0         | 1         | 0         | 0         | Bacteria; Proteobacteria; Betaproteobacteria; Procabacteriales; Procabacteriaceae |
| Otu4346 | 2       | 0       | 0       | 0        | 0       | 0        | 0         | 0         | 0         | 0         | 0         | 0         | Bacteria; Planctomycetes                                                          |
| Otu4119 | 0       | 3       | 0       | 2        | 0       | 2        | 0         | 0         | 0         | 1         | 0         | 0         | Bacteria; Chloroflexi; Ktedonobacteria; JG30-KF-AS9                               |
| Otu3990 | 0       | 2       | 0       | 0        | 3       | 1        | 1         | 1         | 1         | 1         | 2         | 0         | Bacteria; Proteobacteria; Gammaproteobacteria; Legionellales                      |
| Otu3481 | 0       | 3       | 1       | 2        | 0       | 0        | 0         | 0         | 1         | 0         | 1         | 0         | Bacteria; Planctomycetes; Planctomycetia; Gemmatales; Gemmataceae                 |
| Otu2173 | 0       | 3       | 0       | 0        | 0       | 0        | 0         | 0         | 0         | 0         | 0         | 0         | Bacteria                                                                          |
| Otu2172 | 5       | 3       | 1       | 2        | 2       | 6        | 1         | 11        | 5         | 1         | 10        | 1         | Bacteria; Actinobacteria; Actinobacteria; Actinomycetales; Nakamurellaceae        |
| Otu2171 | 0       | 0       | 0       | 0        | 0       | 4        | 0         | 0         | 1         | 1         | 0         | 1         | Bacteria; Planctomycetes; Planctomycetia; Gemmatales; Gemmataceae                 |
| Otu2170 | 2       | 3       | 1       | 1        | 0       | 0        | 0         | 1         | 0         | 2         | 0         | 0         | Bacteria; Planctomycetes; Phycisphaerae; WD2101                                   |
| Otu2177 | 0       | 0       | 3       | 0        | 0       | 0        | 0         | 0         | 0         | 0         | 0         | 0         | Bacteria; TM6; SJA-4                                                              |
| Otu2176 | 0       | 0       | 0       | 0        | 1       | 1        | 3         | 0         | 0         | 0         | 1         | 1         | Bacteria; Proteobacteria; Betaproteobacteria                                      |

| #OTU ID | Z31DRh1 | Z31DRh2 | Z31DRh3 | Z31DRh4r | Z31DRh5 | Z31DRh6r | Z31J1DRh1 | Z31J1DRh2 | Z31J1DRh3 | Z31J1DRh4 | Z31J1DRh5 | Z31J1DRh6 | taxonomy                                                                                                                     |
|---------|---------|---------|---------|----------|---------|----------|-----------|-----------|-----------|-----------|-----------|-----------|------------------------------------------------------------------------------------------------------------------------------|
| Otu2175 | 3       | 1       | 5       | 2        | 5       | 3        | 2         | 0         | 2         | 0         | 3         | 0         | Bacteria; Proteobacteria; Alphaproteobacteria; Caulobacterales; Caulobacteraceae; Asticcacaulis; Asticcacaulis_biprosthecium |
| Otu2174 | 0       | 0       | 0       | 0        | 0       | 0        | 0         | 3         | 0         | 0         | 0         | 0         | Bacteria; Bacteroidetes                                                                                                      |
| Otu4327 | 0       | 0       | 0       | 0        | 2       | 0        | 0         | 0         | 0         | 0         | 0         | 0         | Bacteria; Proteobacteria; Deltaproteobacteria; Myxococcales                                                                  |
| Otu2179 | 0       | 2       | 1       | 0        | 0       | 1        | 0         | 6         | 0         | 0         | 0         | 0         | Bacteria                                                                                                                     |
| Otu2178 | 0       | 0       | 1       | 1        | 1       | 2        | 1         | 3         | 1         | 1         | 0         | 0         | Bacteria; Actinobacteria; Actinobacteria; Actinomycetales; Pseudonocardiaaceae; Actinomycetospora                            |
| Otu3991 | 1       | 0       | 0       | 0        | 1       | 2        | 0         | 0         | 0         | 0         | 0         | 0         | Bacteria; Cyanobacteria; ML635J-21                                                                                           |
| Otu3766 | 0       | 0       | 0       | 0        | 0       | 1        | 1         | 1         | 2         | 0         | 0         | 0         | Bacteria; Proteobacteria; Deltaproteobacteria; Spirobaillales                                                                |
| Otu1608 | 0       | 0       | 0       | 0        | 0       | 5        | 0         | 5         | 3         | 0         | 1         | 0         | Bacteria; Armatimonadetes; 0319-6E2                                                                                          |
| Otu1609 | 1       | 0       | 2       | 3        | 1       | 7        | 0         | 1         | 2         | 1         | 3         | 1         | Bacteria; Planctomycetes; Planctomycetia; Gemmatales; Gemmataceae                                                            |
| Otu3998 | 0       | 0       | 0       | 0        | 0       | 0        | 2         | 0         | 0         | 0         | 0         | 0         | Bacteria; Proteobacteria; Deltaproteobacteria; Bdellovibrionales; Bdellovibrionaceae; Bdellovibrio                           |
| Otu3999 | 0       | 0       | 0       | 0        | 0       | 3        | 0         | 0         | 0         | 0         | 0         | 0         | Bacteria; Cyanobacteria; Synechococcophycideae; Pseudanabaenales; Pseudanabaenaceae; Leptolyngbya; Leptolyngbya_frigida      |
| Otu1600 | 0       | 0       | 0       | 0        | 0       | 0        | 0         | 0         | 6         | 0         | 0         | 0         | Bacteria; Proteobacteria; Alphaproteobacteria; BD7-3                                                                         |
| Otu1601 | 1       | 1       | 2       | 3        | 2       | 8        | 2         | 3         | 6         | 2         | 1         | 0         | Bacteria; Actinobacteria; Thermoleophilia; Solirubrobacterales; Patulibacteraceae                                            |
| Otu1602 | 2       | 0       | 0       | 0        | 1       | 2        | 1         | 5         | 2         | 2         | 2         | 3         | Bacteria; Proteobacteria; Alphaproteobacteria; Rhodospirillales; Rhodospirillaceae                                           |
| Otu1603 | 0       | 1       | 0       | 4        | 3       | 1        | 0         | 1         | 1         | 0         | 5         | 0         | Bacteria; Proteobacteria; Deltaproteobacteria; Bdellovibrionales; Bdellovibrionaceae; Bdellovibrio                           |
| Otu1604 | 3       | 7       | 2       | 3        | 8       | 15       | 5         | 4         | 4         | 3         | 3         | 3         | Bacteria; Planctomycetes; Planctomycetia; Gemmatales; Gemmataceae                                                            |
| Otu1605 | 3       | 3       | 1       | 5        | 4       | 1        | 2         | 1         | 1         | 2         | 2         | 1         | Bacteria; Proteobacteria; Alphaproteobacteria                                                                                |
| Otu1606 | 0       | 3       | 2       | 2        | 0       | 0        | 3         | 1         | 0         | 0         | 7         | 1         | Bacteria; Proteobacteria; Alphaproteobacteria; Rhodospirillales                                                              |
| Otu1607 | 0       | 0       | 1       | 1        | 0       | 4        | 1         | 1         | 3         | 2         | 3         | 0         | Bacteria; Planctomycetes; Planctomycetia; Gemmatales; Gemmataceae                                                            |
| Otu3288 | 0       | 0       | 0       | 0        | 0       | 2        | 0         | 1         | 0         | 0         | 0         | 0         | Bacteria; Planctomycetes; Planctomycetia; Gemmatales; Isosphaeraaceae                                                        |
| Otu3289 | 0       | 2       | 0       | 0        | 0       | 0        | 0         | 0         | 0         | 0         | 0         | 0         | Bacteria; Verrucomicrobia; Opiritae; Opiritales; Opiritaceae; Opiritus                                                       |
| Otu3286 | 0       | 2       | 0       | 1        | 0       | 1        | 1         | 0         | 0         | 0         | 0         | 0         | Bacteria; Proteobacteria                                                                                                     |

| #OTU ID | Z31DRh1 | Z31DRh2 | Z31DRh3 | Z31DRh4r | Z31DRh5 | Z31DRh6r | Z31J1DRh1 | Z31J1DRh2 | Z31J1DRh3 | Z31J1DRh4 | Z31J1DRh5 | Z31J1DRh6 | taxonomy                                                                                           |
|---------|---------|---------|---------|----------|---------|----------|-----------|-----------|-----------|-----------|-----------|-----------|----------------------------------------------------------------------------------------------------|
| Otu549  | 6       | 4       | 3       | 15       | 9       | 35       | 5         | 3         | 6         | 8         | 7         | 1         | Bacteria; Chloroflexi; Anaerolineae; Caldilineales; Caldilineaceae                                 |
| Otu3284 | 0       | 0       | 1       | 0        | 0       | 0        | 0         | 0         | 0         | 2         | 0         | 2         | Bacteria; Proteobacteria; Betaproteobacteria                                                       |
| Otu3285 | 1       | 2       | 2       | 0        | 1       | 4        | 2         | 2         | 3         | 2         | 2         | 0         | Bacteria; Planctomycetes; Planctomycetia; Gemmatales; Gemmataceae; Gemmata                         |
| Otu3282 | 0       | 0       | 0       | 0        | 0       | 1        | 0         | 0         | 0         | 3         | 0         | 4         | Bacteria; Proteobacteria; Deltaproteobacteria; Myxococcales; OM27                                  |
| Otu3283 | 0       | 0       | 0       | 0        | 0       | 0        | 0         | 0         | 0         | 0         | 0         | 2         | Bacteria; Proteobacteria                                                                           |
| Otu3280 | 1       | 0       | 0       | 1        | 0       | 1        | 1         | 6         | 1         | 0         | 2         | 0         | Bacteria; Planctomycetes; Planctomycetia; Gemmatales; Gemmataceae; Gemmata                         |
| Otu548  | 12      | 12      | 9       | 26       | 16      | 25       | 12        | 36        | 12        | 17        | 15        | 5         | Bacteria; Planctomycetes; Phycisphaerae; WD2101                                                    |
| Otu3974 | 0       | 1       | 0       | 1        | 0       | 0        | 0         | 0         | 0         | 2         | 0         | 0         | Bacteria; Actinobacteria; MB-A2-108; 0319-7L14                                                     |
| Otu3976 | 0       | 0       | 0       | 0        | 2       | 1        | 0         | 0         | 0         | 0         | 0         | 0         | Bacteria; Planctomycetes; Planctomycetia; Gemmatales; Gemmataceae                                  |
| Otu3977 | 10      | 4       | 7       | 11       | 9       | 19       | 17        | 17        | 25        | 12        | 13        | 0         | Bacteria; Acidobacteria; iii1-8; DS-18                                                             |
| Otu3970 | 0       | 4       | 0       | 1        | 1       | 2        | 1         | 0         | 0         | 0         | 1         | 2         | Bacteria; Actinobacteria; Actinobacteria; Actinomycetales; Micromonosporaceae; Catellatospora      |
| Otu3971 | 1       | 0       | 0       | 4        | 3       | 0        | 0         | 1         | 0         | 0         | 1         | 0         | Bacteria; Chloroflexi; P2-11E                                                                      |
| Otu3972 | 0       | 0       | 0       | 0        | 0       | 0        | 1         | 3         | 0         | 0         | 0         | 0         | Bacteria; Gemmatimonadetes; Gemmatimonadetes; Gemmatimonadales; Ellin5301                          |
| Otu3973 | 0       | 0       | 0       | 0        | 0       | 0        | 0         | 0         | 0         | 0         | 2         | 0         | Bacteria; OP11; OP11-3                                                                             |
| Otu3978 | 0       | 0       | 0       | 0        | 2       | 0        | 0         | 0         | 0         | 0         | 0         | 0         | Bacteria; Verrucomicrobia; Spartobacteria; Chthoniobacteriales; Chthoniobacteraceae                |
| Otu3979 | 0       | 0       | 0       | 0        | 2       | 0        | 0         | 0         | 1         | 0         | 0         | 0         | Bacteria; Proteobacteria; Betaproteobacteria                                                       |
| Otu3997 | 1       | 0       | 0       | 0        | 2       | 0        | 1         | 1         | 0         | 0         | 0         | 0         | Bacteria; Proteobacteria; Deltaproteobacteria; Bdellovibrionales; Bdellovibrionaceae; Bdellovibrio |
| Otu4176 | 1       | 0       | 0       | 0        | 0       | 3        | 0         | 0         | 0         | 0         | 0         | 0         | Bacteria; Armatimonadetes; Armatimonadia; Armatimonadales; Armatimonadaceae                        |
| Otu1734 | 0       | 0       | 0       | 0        | 0       | 0        | 4         | 0         | 0         | 0         | 0         | 0         | Bacteria; Proteobacteria                                                                           |
| Otu1735 | 0       | 1       | 1       | 2        | 0       | 0        | 5         | 0         | 3         | 0         | 2         | 0         | Bacteria; Verrucomicrobia; Pedosphaerae; Pedosphaerales                                            |
| Otu1736 | 0       | 0       | 0       | 0        | 4       | 10       | 0         | 0         | 5         | 0         | 0         | 4         | Bacteria; Proteobacteria; Deltaproteobacteria; Myxococcales; Cystobacterineae                      |
| Otu1737 | 5       | 4       | 0       | 2        | 1       | 9        | 1         | 0         | 0         | 0         | 0         | 0         | Bacteria; Planctomycetes; Planctomycetia; Planctomycetales; Planctomycetaceae; Planctomyces        |

| #OTU ID | Z31DRh1 | Z31DRh2 | Z31DRh3 | Z31DRh4r | Z31DRh5 | Z31DRh6r | Z31J1DRh1 | Z31J1DRh2 | Z31J1DRh3 | Z31J1DRh4 | Z31J1DRh5 | Z31J1DRh6 | taxonomy                                                                                           |
|---------|---------|---------|---------|----------|---------|----------|-----------|-----------|-----------|-----------|-----------|-----------|----------------------------------------------------------------------------------------------------|
| Otu1730 | 1       | 2       | 0       | 2        | 2       | 3        | 5         | 6         | 2         | 7         | 2         | 1         | Bacteria; Proteobacteria; Deltaproteobacteria                                                      |
| Otu1731 | 1       | 1       | 0       | 1        | 0       | 2        | 4         | 0         | 0         | 0         | 1         | 0         | Bacteria; Bacteroidetes; Saprospirae; Saprospirales; Chitinophagaceae; Flavisolibacter             |
| Otu1732 | 3       | 5       | 0       | 0        | 0       | 7        | 1         | 0         | 0         | 0         | 2         | 0         | Bacteria; Proteobacteria; Deltaproteobacteria; Myxococcales                                        |
| Otu1733 | 0       | 1       | 2       | 1        | 0       | 0        | 3         | 0         | 4         | 2         | 1         | 0         | Bacteria; TM7; SC3                                                                                 |
| Otu2007 | 0       | 1       | 0       | 1        | 0       | 0        | 3         | 1         | 7         | 2         | 2         | 0         | Bacteria; Proteobacteria; Gammaproteobacteria; Legionellales; Coxiellaceae; Aquicella              |
| Otu541  | 1       | 36      | 19      | 5        | 35      | 7        | 3         | 8         | 1         | 28        | 38        | 0         | Bacteria; Chloroflexi; Anaerolineae; CFB-26                                                        |
| Otu2005 | 12      | 7       | 2       | 12       | 1       | 12       | 4         | 9         | 4         | 4         | 5         | 11        | Bacteria; Proteobacteria; Alphaproteobacteria; Rhodospirillales; Rhodospirillaceae                 |
| Otu2004 | 0       | 0       | 0       | 0        | 1       | 0        | 0         | 3         | 0         | 0         | 0         | 0         | Bacteria; TM7; TM7-1                                                                               |
| Otu1738 | 1       | 5       | 0       | 3        | 0       | 4        | 9         | 5         | 2         | 3         | 1         | 0         | Bacteria; Firmicutes; Bacilli; Bacillales; Paenibacillaceae; Ammoniphilus                          |
| Otu1739 | 0       | 4       | 2       | 1        | 5       | 4        | 0         | 0         | 0         | 3         | 4         | 0         | Bacteria; Chloroflexi; Anaerolineae; SBR1031; oc28                                                 |
| Otu2001 | 0       | 0       | 1       | 0        | 0       | 3        | 0         | 0         | 0         | 0         | 0         | 0         | Bacteria; Proteobacteria; Deltaproteobacteria; Bdellovibrionales; Bdellovibrionaceae; Bdellovibrio |
| Otu540  | 19      | 7       | 19      | 32       | 5       | 15       | 9         | 17        | 25        | 17        | 7         | 21        | Bacteria; Proteobacteria; Deltaproteobacteria; Myxococcales; Polyangiaceae                         |
| Otu4360 | 0       | 0       | 2       | 2        | 0       | 1        | 2         | 0         | 0         | 1         | 1         | 0         | Bacteria; Gemmatimonadetes; Gemm-1                                                                 |
| Otu941  | 6       | 12      | 1       | 8        | 5       | 15       | 10        | 10        | 8         | 3         | 10        | 4         | Bacteria; Actinobacteria; Thermoleophilia; Solirubrobacterales; Patulibacteraceae                  |
| Otu3651 | 1       | 15      | 0       | 18       | 4       | 19       | 23        | 5         | 9         | 2         | 13        | 16        | Bacteria; Bacteroidetes; Sphingobacteriia; Sphingobacteriales                                      |
| Otu940  | 28      | 11      | 24      | 38       | 12      | 89       | 24        | 27        | 21        | 9         | 21        | 53        | Bacteria; Proteobacteria; Gammaproteobacteria; Xanthomonadales; Xanthomonadaceae                   |
| Otu767  | 151     | 22      | 20      | 39       | 12      | 328      | 29        | 43        | 124       | 9         | 1         | 21        | Bacteria; Bacteroidetes; Saprospirae; Saprospirales; Chitinophagaceae; Niabella                    |
| Otu4361 | 0       | 0       | 0       | 1        | 1       | 0        | 0         | 0         | 0         | 2         | 0         | 0         | Bacteria; Proteobacteria; Deltaproteobacteria                                                      |
| Otu942  | 0       | 0       | 0       | 0        | 0       | 11       | 0         | 0         | 0         | 0         | 2         | 0         | Bacteria; Chloroflexi; Thermomicrobia; JG30-KF-CM45                                                |
| Otu761  | 24      | 31      | 6       | 19       | 12      | 27       | 6         | 14        | 5         | 10        | 17        | 5         | Bacteria; Proteobacteria; Deltaproteobacteria; Myxococcales                                        |
| Otu2285 | 1       | 8       | 2       | 3        | 0       | 4        | 0         | 0         | 1         | 1         | 2         | 1         | Bacteria; Chloroflexi; Chloroflexi; Roseiflexales                                                  |
| Otu944  | 2       | 2       | 2       | 0        | 4       | 15       | 1         | 4         | 2         | 0         | 3         | 3         | Bacteria; Verrucomicrobia; Pedosphaerae; Pedosphaerales                                            |

| #OTU ID | Z31DRh1 | Z31DRh2 | Z31DRh3 | Z31DRh4r | Z31DRh5 | Z31DRh6r | Z31J1DRh1 | Z31J1DRh2 | Z31J1DRh3 | Z31J1DRh4 | Z31J1DRh5 | Z31J1DRh6 | taxonomy                                                                                                 |
|---------|---------|---------|---------|----------|---------|----------|-----------|-----------|-----------|-----------|-----------|-----------|----------------------------------------------------------------------------------------------------------|
| Otu1459 | 0       | 5       | 0       | 0        | 0       | 2        | 2         | 0         | 0         | 0         | 1         | 0         | Bacteria; Proteobacteria                                                                                 |
| Otu1458 | 1       | 0       | 0       | 2        | 1       | 0        | 0         | 2         | 0         | 0         | 1         | 9         | Bacteria; Proteobacteria; Deltaproteobacteria; Bdellovibrionales; Bdellovibrionaceae; Bdellovibrio       |
| Otu763  | 14      | 16      | 6       | 2        | 8       | 10       | 30        | 14        | 18        | 11        | 12        | 1         | Bacteria; Proteobacteria; Deltaproteobacteria; Myxococcales                                              |
| Otu3401 | 0       | 0       | 0       | 0        | 0       | 2        | 0         | 0         | 0         | 0         | 0         | 0         | Bacteria; Proteobacteria                                                                                 |
| Otu1451 | 1       | 14      | 6       | 5        | 2       | 11       | 7         | 4         | 6         | 4         | 20        | 1         | Bacteria; Actinobacteria; Thermoleophilia; Gaiellales; Gaiellaceae                                       |
| Otu1450 | 0       | 0       | 0       | 6        | 0       | 0        | 0         | 0         | 0         | 0         | 0         | 0         | Bacteria; Proteobacteria; Alphaproteobacteria; BD7-3                                                     |
| Otu1453 | 0       | 0       | 0       | 6        | 0       | 1        | 0         | 0         | 0         | 1         | 0         | 0         | Bacteria                                                                                                 |
| Otu762  | 23      | 114     | 16      | 34       | 43      | 34       | 19        | 8         | 3         | 40        | 27        | 10        | Bacteria; Acidobacteria; Chloracidobacteria; RB41                                                        |
| Otu1455 | 0       | 1       | 0       | 0        | 0       | 2        | 0         | 6         | 1         | 1         | 1         | 4         | Bacteria; Chlamydiae; Chlamydia; Chlamydiales                                                            |
| Otu1454 | 1       | 2       | 0       | 0        | 4       | 10       | 0         | 2         | 3         | 5         | 1         | 5         | Bacteria; Proteobacteria; Gammaproteobacteria; Xanthomonadales; Sinobacteraceae; Nevskia; Nevskia_ramosa |
| Otu1457 | 0       | 0       | 0       | 0        | 1       | 2        | 0         | 0         | 0         | 1         | 5         | 0         | Bacteria; Chloroflexi; Anaerolineae; SBR1031; A4b                                                        |
| Otu1456 | 0       | 0       | 0       | 0        | 0       | 0        | 0         | 0         | 0         | 0         | 7         | 0         | Bacteria; OD1                                                                                            |
| Otu4362 | 1       | 0       | 0       | 0        | 0       | 0        | 0         | 2         | 2         | 1         | 0         | 0         | Bacteria; Planctomycetes; Planctomycetia; Gemmatales; Gemmataceae                                        |
| Otu4354 | 0       | 0       | 0       | 0        | 2       | 0        | 0         | 0         | 0         | 0         | 0         | 0         | Bacteria                                                                                                 |
| Otu2284 | 20      | 7       | 10      | 64       | 6       | 28       | 27        | 37        | 16        | 25        | 17        | 6         | Bacteria; Chloroflexi; Anaerolineae; SBR1031; A4b                                                        |
| Otu2489 | 0       | 0       | 0       | 3        | 0       | 0        | 0         | 0         | 0         | 0         | 1         | 0         | Bacteria; Chloroflexi; Anaerolineae                                                                      |
| Otu2821 | 1       | 11      | 1       | 7        | 3       | 3        | 6         | 11        | 7         | 4         | 14        | 2         | Bacteria; Chlorobi                                                                                       |
| Otu2820 | 3       | 1       | 2       | 2        | 1       | 1        | 3         | 2         | 2         | 0         | 3         | 0         | Bacteria; Gemmatimonadetes; Gemmatimonadetes                                                             |
| Otu2823 | 0       | 0       | 0       | 0        | 0       | 0        | 2         | 0         | 0         | 0         | 0         | 0         | Bacteria; Proteobacteria; Betaproteobacteria; SC-I-84                                                    |
| Otu2488 | 0       | 0       | 0       | 0        | 3       | 0        | 0         | 0         | 0         | 0         | 0         | 0         | Bacteria; Acidobacteria; Acidobacteria-6; iii1-15; RB40                                                  |
| Otu2825 | 0       | 0       | 0       | 0        | 0       | 1        | 2         | 0         | 0         | 1         | 2         | 0         | Bacteria; Proteobacteria                                                                                 |
| Otu2824 | 0       | 0       | 0       | 5        | 0       | 0        | 1         | 1         | 0         | 1         | 0         | 1         | Bacteria; Proteobacteria; Gammaproteobacteria; Legionellales                                             |



| #OTU ID | Z31DRh1 | Z31DRh2 | Z31DRh3 | Z31DRh4r | Z31DRh5 | Z31DRh6r | Z31J1DRh1 | Z31J1DRh2 | Z31J1DRh3 | Z31J1DRh4 | Z31J1DRh5 | Z31J1DRh6 | taxonomy                                                                                                 |
|---------|---------|---------|---------|----------|---------|----------|-----------|-----------|-----------|-----------|-----------|-----------|----------------------------------------------------------------------------------------------------------|
| Otu2827 | 22      | 7       | 10      | 40       | 5       | 12       | 17        | 19        | 11        | 21        | 14        | 13        | Bacteria; Proteobacteria; Alphaproteobacteria; Sphingomonadales; Sphingomonadaceae; Kaistobacter         |
| Otu2826 | 0       | 0       | 0       | 0        | 0       | 0        | 0         | 2         | 0         | 0         | 0         | 0         | Bacteria; Chloroflexi; Ktedonobacteria                                                                   |
| Otu2829 | 0       | 3       | 0       | 0        | 0       | 1        | 0         | 0         | 0         | 0         | 0         | 0         | Bacteria; Proteobacteria; Alphaproteobacteria; Rickettsiales; Rickettsiaceae                             |
| Otu2828 | 0       | 1       | 2       | 0        | 0       | 0        | 2         | 4         | 0         | 0         | 0         | 0         | Bacteria; TM7; SC3                                                                                       |
| Otu3420 | 0       | 2       | 0       | 0        | 0       | 0        | 0         | 0         | 0         | 0         | 0         | 0         | Bacteria; Chloroflexi; Anaerolineae; SJA-15                                                              |
| Otu3421 | 0       | 0       | 0       | 0        | 0       | 0        | 0         | 0         | 0         | 0         | 2         | 0         | Bacteria; Proteobacteria; Gammaproteobacteria                                                            |
| Otu3426 | 0       | 4       | 0       | 0        | 0       | 0        | 0         | 0         | 0         | 0         | 0         | 0         | Bacteria                                                                                                 |
| Otu3427 | 0       | 0       | 0       | 0        | 0       | 0        | 0         | 0         | 2         | 0         | 0         | 0         | Bacteria                                                                                                 |
| Otu3424 | 0       | 1       | 1       | 0        | 0       | 0        | 0         | 1         | 3         | 0         | 2         | 1         | Bacteria; Proteobacteria; Deltaproteobacteria; Myxococcales                                              |
| Otu3425 | 2       | 0       | 0       | 0        | 0       | 0        | 0         | 0         | 1         | 0         | 0         | 1         | Bacteria                                                                                                 |
| Otu3849 | 3       | 14      | 4       | 10       | 7       | 12       | 2         | 6         | 4         | 3         | 21        | 0         | Bacteria; Bacteroidetes; Saprospirae; Saprospirales; Chitinophagaceae                                    |
| Otu3007 | 0       | 3       | 1       | 0        | 0       | 0        | 0         | 0         | 0         | 0         | 3         | 0         | Bacteria; Spirochaetes; Spirochaetes; Spirochaetales; Spirochaetaceae; Spirochaeta; Spirochaeta_aurantia |
| Otu4364 | 0       | 0       | 0       | 1        | 0       | 0        | 0         | 3         | 0         | 0         | 0         | 0         | Bacteria; TM7; TM7-1                                                                                     |
| Otu2955 | 0       | 1       | 0       | 0        | 1       | 3        | 0         | 0         | 0         | 3         | 0         | 0         | Bacteria                                                                                                 |
| Otu2954 | 0       | 0       | 1       | 0        | 2       | 1        | 2         | 2         | 1         | 1         | 2         | 0         | Bacteria; Chlamydiae; Chlamydia; Chlamydiales                                                            |
| Otu2957 | 0       | 2       | 2       | 1        | 1       | 0        | 1         | 1         | 0         | 0         | 0         | 0         | Bacteria; Acidobacteria; Solibacteres; Solibacterales; Solibacteraceae; Candidatus_Solibacter            |
| Otu2956 | 0       | 0       | 0       | 1        | 0       | 0        | 0         | 0         | 2         | 2         | 2         | 0         | Bacteria; Bacteroidetes; Cytophagia; Cytophagales; Cytophagaceae                                         |
| Otu2951 | 2       | 3       | 1       | 3        | 10      | 15       | 3         | 4         | 8         | 3         | 1         | 5         | Bacteria; Chloroflexi; Ktedonobacteria; JG30-KF-AS9                                                      |
| Otu2950 | 0       | 1       | 2       | 5        | 0       | 0        | 0         | 1         | 1         | 0         | 0         | 2         | Bacteria; Proteobacteria; Betaproteobacteria                                                             |
| Otu2953 | 0       | 0       | 0       | 0        | 0       | 0        | 0         | 0         | 0         | 0         | 2         | 0         | Bacteria                                                                                                 |
| Otu2952 | 1       | 0       | 0       | 0        | 1       | 0        | 0         | 0         | 1         | 0         | 0         | 2         | Bacteria; Proteobacteria; Betaproteobacteria; Burkholderiales; Comamonadaceae                            |
| Otu3862 | 1       | 0       | 0       | 2        | 0       | 1        | 1         | 0         | 1         | 1         | 1         | 0         | Bacteria; Proteobacteria                                                                                 |



| #OTU ID | Z31DRh1 | Z31DRh2 | Z31DRh3 | Z31DRh4r | Z31DRh5 | Z31DRh6r | Z31J1DRh1 | Z31J1DRh2 | Z31J1DRh3 | Z31J1DRh4 | Z31J1DRh5 | Z31J1DRh6 | taxonomy                                                                                     |
|---------|---------|---------|---------|----------|---------|----------|-----------|-----------|-----------|-----------|-----------|-----------|----------------------------------------------------------------------------------------------|
| Otu3406 | 0       | 0       | 1       | 0        | 2       | 1        | 0         | 0         | 0         | 1         | 1         | 0         | Bacteria; Chlamydiae; Chlamydia; Chlamydiales; Parachlamydiaceae                             |
| Otu4366 | 0       | 0       | 0       | 1        | 1       | 1        | 1         | 0         | 0         | 0         | 2         | 0         | Bacteria; Acidobacteria; Sva0725; Sva0725                                                    |
| Otu2800 | 0       | 4       | 0       | 0        | 0       | 2        | 2         | 3         | 1         | 0         | 1         | 0         | Bacteria; Acidobacteria; Acidobacteria-6; iii1-15; RB40                                      |
| Otu4368 | 0       | 0       | 0       | 0        | 0       | 0        | 0         | 0         | 2         | 0         | 0         | 0         | Bacteria                                                                                     |
| Otu3860 | 5       | 7       | 1       | 5        | 6       | 5        | 4         | 4         | 0         | 1         | 4         | 1         | Bacteria; Chloroflexi; TK10; AKYG885; Dolo_23                                                |
| Otu4369 | 0       | 1       | 0       | 0        | 1       | 0        | 0         | 2         | 0         | 1         | 0         | 0         | Bacteria; TM6; SJA-4; S1198                                                                  |
| Otu3982 | 0       | 0       | 0       | 2        | 0       | 0        | 0         | 0         | 0         | 0         | 0         | 0         | Bacteria; WS3; PRR-12; Sediment-1                                                            |
| Otu2473 | 0       | 0       | 0       | 2        | 0       | 1        | 0         | 4         | 2         | 0         | 0         | 1         | Bacteria; Bacteroidetes; Cytophagia; Cytophagales; Cytophagaceae                             |
| Otu3341 | 0       | 1       | 1       | 2        | 0       | 0        | 0         | 2         | 1         | 1         | 3         | 0         | Bacteria; Proteobacteria; Gammaproteobacteria; Xanthomonadales; Sinobacteraceae              |
| Otu3549 | 1       | 0       | 0       | 0        | 0       | 1        | 4         | 3         | 4         | 1         | 1         | 1         | Bacteria; Proteobacteria; Alphaproteobacteria; Caulobacterales; Caulobacteraceae             |
| Otu2779 | 2       | 0       | 0       | 0        | 0       | 0        | 0         | 0         | 0         | 0         | 0         | 0         | Bacteria                                                                                     |
| Otu2778 | 0       | 0       | 0       | 0        | 0       | 3        | 0         | 0         | 0         | 0         | 0         | 0         | Bacteria; Proteobacteria; Deltaproteobacteria; Myxococcales                                  |
| Otu3606 | 0       | 0       | 0       | 0        | 0       | 0        | 0         | 1         | 2         | 0         | 0         | 0         | Bacteria; Proteobacteria; Betaproteobacteria                                                 |
| Otu3607 | 0       | 0       | 0       | 0        | 0       | 2        | 0         | 0         | 0         | 0         | 0         | 0         | Bacteria; Proteobacteria; Gammaproteobacteria                                                |
| Otu3604 | 0       | 0       | 1       | 0        | 0       | 0        | 0         | 0         | 0         | 2         | 0         | 0         | Bacteria; Proteobacteria; Deltaproteobacteria; Myxococcales; Haliangiaceae                   |
| Otu3605 | 0       | 0       | 0       | 0        | 0       | 0        | 0         | 0         | 2         | 0         | 0         | 0         | Bacteria; Firmicutes; Bacilli; Bacillales; Paenibacillaceae; Paenibacillus                   |
| Otu2771 | 7       | 1       | 4       | 12       | 10      | 6        | 3         | 2         | 9         | 0         | 3         | 13        | Bacteria; Proteobacteria; Betaproteobacteria; Burkholderiales; Comamonadaceae                |
| Otu2770 | 0       | 0       | 0       | 0        | 0       | 0        | 0         | 2         | 2         | 0         | 0         | 0         | Bacteria; Bacteroidetes; Saprospirae; Saprospirales; Chitinophagaceae                        |
| Otu2773 | 0       | 0       | 0       | 0        | 0       | 0        | 0         | 2         | 0         | 1         | 0         | 0         | Bacteria; Fibrobacteres; Fibrobacteria; 258ds10                                              |
| Otu2772 | 0       | 0       | 0       | 0        | 0       | 2        | 0         | 0         | 0         | 0         | 0         | 0         | Bacteria; Armatimonadetes; Fimbriimonadia; Fimbriimonadales; Fimbriimonadaceae; Fimbriimonas |
| Otu2775 | 0       | 0       | 0       | 0        | 0       | 0        | 3         | 0         | 0         | 0         | 0         | 0         | Bacteria; TM6; SJA-4; S1198                                                                  |
| Otu2774 | 0       | 2       | 1       | 3        | 0       | 1        | 1         | 1         | 0         | 2         | 1         | 0         | Bacteria; Proteobacteria; Betaproteobacteria; A21b; UD5                                      |

| #OTU ID | Z31DRh1 | Z31DRh2 | Z31DRh3 | Z31DRh4r | Z31DRh5 | Z31DRh6r | Z31J1DRh1 | Z31J1DRh2 | Z31J1DRh3 | Z31J1DRh4 | Z31J1DRh5 | Z31J1DRh6 | taxonomy                                                                                         |
|---------|---------|---------|---------|----------|---------|----------|-----------|-----------|-----------|-----------|-----------|-----------|--------------------------------------------------------------------------------------------------|
| Otu2777 | 0       | 0       | 0       | 0        | 0       | 0        | 2         | 0         | 0         | 0         | 0         | 0         | Bacteria                                                                                         |
| Otu2776 | 0       | 4       | 2       | 4        | 3       | 0        | 2         | 0         | 0         | 0         | 0         | 4         | Bacteria; Acidobacteria; Acidobacteria-6; iii1-15                                                |
| Otu462  | 8       | 9       | 11      | 34       | 3       | 5        | 3         | 5         | 13        | 2         | 4         | 2         | Bacteria; Armatimonadetes; Armatimonadia; Armatimonadales; Armatimonadaceae                      |
| Otu463  | 6       | 21      | 9       | 7        | 9       | 33       | 8         | 14        | 5         | 12        | 29        | 9         | Bacteria; Acidobacteria; Acidobacteria-6; iii1-15                                                |
| Otu460  | 29      | 20      | 26      | 34       | 16      | 35       | 12        | 18        | 19        | 6         | 24        | 2         | Bacteria; Proteobacteria; Gammaproteobacteria; Xanthomonadales; Xanthomonadaceae                 |
| Otu461  | 19      | 28      | 19      | 39       | 17      | 51       | 25        | 38        | 17        | 30        | 37        | 18        | Bacteria; Proteobacteria; Alphaproteobacteria; Rhodospirillales; Rhodospirillaceae               |
| Otu466  | 22      | 29      | 10      | 24       | 25      | 61       | 20        | 35        | 20        | 10        | 21        | 15        | Bacteria; Actinobacteria; Actinobacteria; Actinomycetales; Micromonosporaceae; Dactylosporangium |
| Otu467  | 39      | 0       | 1       | 0        | 0       | 6        | 0         | 17        | 0         | 0         | 0         | 10        | Bacteria; Proteobacteria; Deltaproteobacteria; Myxococcales                                      |
| Otu464  | 0       | 0       | 2       | 35       | 2       | 6        | 1         | 0         | 0         | 1         | 0         | 0         | Bacteria; Acidobacteria; Chloracidobacteria; 11-24                                               |
| Otu465  | 0       | 1       | 9       | 26       | 3       | 32       | 0         | 0         | 0         | 0         | 0         | 0         | Bacteria                                                                                         |
| Otu468  | 13      | 0       | 6       | 27       | 0       | 1        | 0         | 7         | 0         | 0         | 1         | 0         | Bacteria; Verrucomicrobia; Verrucomicrobiae; Verrucomicrobiales; Verrucomicrobiaceae             |
| Otu469  | 17      | 5       | 5       | 43       | 17      | 38       | 23        | 2         | 10        | 5         | 1         | 58        | Bacteria; Firmicutes; Bacilli; Bacillales; Paenibacillaceae; Cohnella                            |
| Otu1149 | 3       | 3       | 0       | 0        | 0       | 9        | 2         | 1         | 2         | 1         | 0         | 0         | Bacteria; Bacteroidetes; Cytophagia; Cytophagales                                                |
| Otu1148 | 7       | 4       | 7       | 3        | 3       | 12       | 2         | 7         | 5         | 2         | 4         | 3         | Bacteria; Chlorobi                                                                               |
| Otu1143 | 0       | 0       | 1       | 9        | 0       | 6        | 1         | 0         | 1         | 0         | 0         | 0         | Bacteria                                                                                         |
| Otu1142 | 2       | 0       | 0       | 3        | 1       | 17       | 0         | 1         | 4         | 3         | 0         | 0         | Bacteria; Bacteroidetes; Saprospirae; Saprospirales; Chitinophagaceae                            |
| Otu1141 | 0       | 11      | 0       | 0        | 0       | 0        | 0         | 0         | 0         | 0         | 0         | 0         | Bacteria; Verrucomicrobia; Verrucomicrobiae; Verrucomicrobiales; Verrucomicrobiaceae             |
| Otu1140 | 2       | 3       | 1       | 8        | 25      | 28       | 7         | 2         | 3         | 4         | 18        | 5         | Bacteria; Verrucomicrobia; Pedosphaerae; Pedosphaerales; Ellin515                                |
| Otu1147 | 1       | 1       | 3       | 8        | 1       | 8        | 1         | 1         | 2         | 3         | 5         | 0         | Bacteria; Proteobacteria; TA18; PHOS-HD29                                                        |
| Otu1146 | 1       | 2       | 1       | 4        | 2       | 19       | 1         | 0         | 2         | 0         | 3         | 1         | Bacteria; Actinobacteria; Actinobacteria; Actinomycetales; Nocardioideae; Nocardioidea           |
| Otu1145 | 0       | 12      | 1       | 0        | 2       | 0        | 6         | 0         | 0         | 10        | 3         | 0         | Bacteria; Acidobacteria; Acidobacteria-6; iii1-15; RB40                                          |
| Otu1144 | 29      | 41      | 20      | 47       | 31      | 46       | 35        | 25        | 23        | 51        | 46        | 28        | Bacteria; Proteobacteria; Deltaproteobacteria; Myxococcales                                      |

| #OTU ID | Z31DRh1 | Z31DRh2 | Z31DRh3 | Z31DRh4r | Z31DRh5 | Z31DRh6r | Z31J1DRh1 | Z31J1DRh2 | Z31J1DRh3 | Z31J1DRh4 | Z31J1DRh5 | Z31J1DRh6 | taxonomy                                                                                                          |
|---------|---------|---------|---------|----------|---------|----------|-----------|-----------|-----------|-----------|-----------|-----------|-------------------------------------------------------------------------------------------------------------------|
| Otu2483 | 0       | 0       | 0       | 0        | 0       | 5        | 2         | 0         | 1         | 0         | 0         | 1         | Bacteria                                                                                                          |
| Otu2482 | 1       | 1       | 4       | 3        | 1       | 6        | 1         | 2         | 2         | 5         | 1         | 2         | Bacteria; Proteobacteria; Alphaproteobacteria; Rhodospirillales; Acetobacteraceae                                 |
| Otu608  | 5       | 2       | 0       | 28       | 0       | 8        | 6         | 0         | 0         | 11        | 1         | 10        | Bacteria; Bacteroidetes; Saprospirae; Saprospirales; Chitinophagaceae                                             |
| Otu609  | 22      | 22      | 18      | 27       | 23      | 53       | 36        | 34        | 49        | 47        | 37        | 27        | Bacteria; Proteobacteria; Alphaproteobacteria                                                                     |
| Otu2487 | 4       | 2       | 0       | 0        | 0       | 0        | 0         | 3         | 0         | 0         | 1         | 0         | Bacteria; Verrucomicrobia; Spartobacteria; Chthoniobacteriales; Chthoniobacteraceae; Candidatus_Xiphinematobacter |
| Otu2486 | 0       | 0       | 0       | 0        | 0       | 0        | 0         | 6         | 0         | 1         | 0         | 0         | Bacteria; Tenericutes; Mollicutes; Anaeroplasmatales; Anaeroplasmataceae; Asteroleplasma                          |
| Otu2485 | 4       | 0       | 0       | 0        | 0       | 0        | 0         | 0         | 0         | 0         | 0         | 0         | Bacteria; Proteobacteria                                                                                          |
| Otu2484 | 5       | 3       | 0       | 1        | 0       | 2        | 2         | 4         | 5         | 0         | 5         | 1         | Bacteria; Proteobacteria; Gammaproteobacteria; Legionellales                                                      |
| Otu602  | 3       | 24      | 5       | 19       | 13      | 14       | 10        | 59        | 28        | 9         | 34        | 6         | Bacteria; Proteobacteria; Gammaproteobacteria; Legionellales; Coxiellaceae                                        |
| Otu603  | 22      | 20      | 15      | 36       | 19      | 52       | 28        | 52        | 27        | 21        | 16        | 14        | Bacteria; Actinobacteria; Actinobacteria; Actinomycetales                                                         |
| Otu600  | 31      | 13      | 5       | 11       | 10      | 15       | 9         | 10        | 13        | 21        | 17        | 5         | Bacteria; Proteobacteria; Deltaproteobacteria; Myxococcales; Haliangiaceae                                        |
| Otu601  | 5       | 5       | 15      | 35       | 8       | 19       | 12        | 20        | 14        | 9         | 11        | 25        | Bacteria; Proteobacteria; Gammaproteobacteria; Legionellales; Coxiellaceae; Aquicella                             |
| Otu606  | 2       | 0       | 1       | 1        | 1       | 23       | 3         | 0         | 2         | 0         | 0         | 2         | Bacteria; Proteobacteria; Gammaproteobacteria; Xanthomonadales; Sinobacteraceae; Steroidobacter                   |
| Otu604  | 36      | 20      | 13      | 10       | 16      | 23       | 5         | 5         | 2         | 4         | 22        | 6         | Bacteria; Proteobacteria; Deltaproteobacteria; Myxococcales                                                       |
| Otu605  | 6       | 27      | 6       | 11       | 7       | 8        | 14        | 4         | 5         | 1         | 4         | 9         | Bacteria; Verrucomicrobia; Spartobacteria; Chthoniobacteriales; Chthoniobacteraceae                               |
| Otu3658 | 0       | 0       | 0       | 0        | 0       | 0        | 0         | 0         | 0         | 0         | 2         | 0         | Bacteria; Armatimonadetes; SHA-37                                                                                 |
| Otu4042 | 0       | 0       | 0       | 0        | 0       | 2        | 0         | 0         | 0         | 0         | 0         | 0         | Bacteria; Proteobacteria                                                                                          |
| Otu3778 | 0       | 0       | 0       | 0        | 2       | 0        | 0         | 0         | 0         | 0         | 1         | 0         | Bacteria; Acidobacteria                                                                                           |
| Otu3779 | 0       | 0       | 2       | 0        | 0       | 0        | 0         | 1         | 0         | 0         | 0         | 0         | Bacteria                                                                                                          |
| Otu3776 | 2       | 0       | 0       | 0        | 0       | 3        | 0         | 0         | 0         | 0         | 0         | 0         | Bacteria                                                                                                          |
| Otu3777 | 0       | 0       | 0       | 0        | 0       | 0        | 0         | 1         | 0         | 0         | 0         | 2         | Bacteria; Proteobacteria; Deltaproteobacteria                                                                     |
| Otu3774 | 0       | 0       | 2       | 5        | 1       | 4        | 1         | 2         | 19        | 0         | 0         | 0         | Bacteria; Chlamydiae; Chlamydia; Chlamydiales                                                                     |

| #OTU ID | Z31DRh1 | Z31DRh2 | Z31DRh3 | Z31DRh4r | Z31DRh5 | Z31DRh6r | Z31J1DRh1 | Z31J1DRh2 | Z31J1DRh3 | Z31J1DRh4 | Z31J1DRh5 | Z31J1DRh6 | taxonomy                                                                                            |
|---------|---------|---------|---------|----------|---------|----------|-----------|-----------|-----------|-----------|-----------|-----------|-----------------------------------------------------------------------------------------------------|
| Otu3775 | 0       | 0       | 0       | 2        | 0       | 0        | 0         | 0         | 0         | 0         | 0         | 0         | Bacteria; Proteobacteria; Deltaproteobacteria; MIZ46                                                |
| Otu3772 | 13      | 72      | 27      | 39       | 29      | 54       | 23        | 19        | 2         | 34        | 82        | 10        | Bacteria; Verrucomicrobia; Pedosphaerae; Pedosphaerales; Ellin517                                   |
| Otu3773 | 2       | 2       | 1       | 2        | 1       | 6        | 0         | 0         | 2         | 1         | 4         | 0         | Bacteria; Proteobacteria; Deltaproteobacteria; Myxococcales                                         |
| Otu3770 | 1       | 1       | 1       | 2        | 0       | 2        | 3         | 1         | 4         | 4         | 0         | 1         | Bacteria; Bacteroidetes; Sphingobacteria; Sphingobacteriales; Sphingobacteriaceae                   |
| Otu3771 | 0       | 3       | 1       | 7        | 3       | 2        | 1         | 45        | 19        | 1         | 8         | 8         | Bacteria; Bacteroidetes; Cytophagia; Cytophagales; Cytophagaceae                                    |
| Otu268  | 35      | 36      | 17      | 110      | 28      | 79       | 48        | 36        | 38        | 18        | 17        | 43        | Bacteria; Proteobacteria; Alphaproteobacteria; Rhodospirillales; Rhodospirillaceae                  |
| Otu269  | 1       | 3       | 0       | 1        | 2       | 1        | 1         | 1         | 1         | 0         | 67        | 1         | Bacteria; Bacteroidetes; Cytophagia; Cytophagales; Cytophagaceae                                    |
| Otu264  | 78      | 8       | 2       | 8        | 33      | 53       | 6         | 5         | 7         | 3         | 2         | 21        | Bacteria; Verrucomicrobia; Verrucomicrobiae; Verrucomicrobiales; Verrucomicrobiaceae; Luteolibacter |
| Otu265  | 1       | 0       | 1       | 7        | 0       | 20       | 0         | 7         | 58        | 0         | 0         | 32        | Bacteria; Bacteroidetes; Sphingobacteria; Sphingobacteriales                                        |
| Otu266  | 17      | 8       | 38      | 37       | 21      | 79       | 49        | 83        | 79        | 51        | 34        | 33        | Bacteria; Acidobacteria; Acidobacteriia; Acidobacteriales; Acidobacteriaceae                        |
| Otu267  | 42      | 28      | 27      | 59       | 30      | 68       | 51        | 81        | 75        | 68        | 30        | 15        | Bacteria; Acidobacteria; Solibacteres; Solibacterales; Solibacteraceae; Candidatus_Solibacter       |
| Otu260  | 45      | 75      | 62      | 86       | 33      | 73       | 85        | 59        | 52        | 75        | 45        | 31        | Bacteria; Planctomycetes; Phycisphaerae; WD2101                                                     |
| Otu261  | 73      | 181     | 80      | 135      | 86      | 118      | 91        | 67        | 37        | 90        | 141       | 21        | Bacteria; Acidobacteria; iii1-8; DS-18                                                              |
| Otu262  | 91      | 3       | 1       | 8        | 0       | 2        | 0         | 3         | 0         | 0         | 1         | 23        | Bacteria; Bacteroidetes; Saprospirae; Saprospirales; Chitinophagaceae; Chitinophaga                 |
| Otu263  | 13      | 79      | 27      | 39       | 53      | 81       | 78        | 71        | 54        | 49        | 89        | 27        | Bacteria; Acidobacteria; Solibacteres; Solibacterales                                               |
| Otu116  | 63      | 165     | 78      | 202      | 50      | 113      | 111       | 76        | 80        | 78        | 211       | 36        | Bacteria; Acidobacteria; Solibacteres; Solibacterales                                               |
| Otu117  | 50      | 87      | 71      | 92       | 126     | 137      | 178       | 93        | 51        | 41        | 80        | 55        | Bacteria; Firmicutes; Bacilli; Bacillales; Planococcaceae                                           |
| Otu114  | 57      | 25      | 59      | 286      | 19      | 96       | 43        | 17        | 8         | 21        | 14        | 42        | Bacteria; Proteobacteria; Alphaproteobacteria; Rhizobiales; Rhizobiaceae; Rhizobium                 |
| Otu115  | 0       | 0       | 0       | 0        | 23      | 151      | 11        | 2         | 9         | 14        | 7         | 1         | Bacteria; Chloroflexi; Anaerolineae; SBR1031; A4b                                                   |
| Otu112  | 15      | 18      | 14      | 77       | 8       | 163      | 11        | 6         | 7         | 12        | 28        | 10        | Bacteria; Cyanobacteria; Chloroplast; Streptophyta                                                  |
| Otu113  | 135     | 130     | 123     | 247      | 85      | 351      | 162       | 232       | 202       | 146       | 160       | 75        | Bacteria; Acidobacteria; Solibacteres; Solibacterales; Solibacteraceae; Candidatus_Solibacter       |
| Otu110  | 86      | 70      | 90      | 209      | 69      | 154      | 91        | 105       | 52        | 131       | 86        | 42        | Bacteria; Verrucomicrobia; Pedosphaerae; Pedosphaerales; Ellin517                                   |

| #OTU ID | Z31DRh1 | Z31DRh2 | Z31DRh3 | Z31DRh4r | Z31DRh5 | Z31DRh6r | Z31J1DRh1 | Z31J1DRh2 | Z31J1DRh3 | Z31J1DRh4 | Z31J1DRh5 | Z31J1DRh6 | taxonomy                                                                                           |
|---------|---------|---------|---------|----------|---------|----------|-----------|-----------|-----------|-----------|-----------|-----------|----------------------------------------------------------------------------------------------------|
| Otu111  | 61      | 16      | 72      | 84       | 22      | 198      | 25        | 26        | 34        | 21        | 28        | 25        | Bacteria; Planctomycetes; Phycisphaerae; WD2101                                                    |
| Otu1855 | 0       | 1       | 1       | 2        | 2       | 4        | 0         | 2         | 2         | 0         | 8         | 0         | Bacteria; Proteobacteria; Deltaproteobacteria; Myxococcales; Myxococcaceae; Anaeromyxobacter       |
| Otu1854 | 0       | 0       | 0       | 1        | 4       | 3        | 0         | 1         | 1         | 1         | 0         | 0         | Bacteria; Planctomycetes; Planctomycetia; Pirellulales; Pirellulaceae                              |
| Otu1857 | 0       | 0       | 0       | 0        | 0       | 7        | 4         | 0         | 1         | 0         | 2         | 1         | Bacteria; Bacteroidetes; Cytophagia; Cytophagales; Cytophagaceae; Spirosoma                        |
| Otu1856 | 0       | 2       | 1       | 3        | 5       | 1        | 2         | 6         | 1         | 3         | 2         | 0         | Bacteria; Bacteroidetes; Sphingobacteriia; Sphingobacteriales                                      |
| Otu1851 | 2       | 0       | 0       | 2        | 0       | 6        | 0         | 7         | 0         | 0         | 0         | 0         | Bacteria; Proteobacteria; Deltaproteobacteria; Myxococcales                                        |
| Otu1850 | 0       | 1       | 2       | 2        | 6       | 3        | 3         | 6         | 7         | 2         | 1         | 2         | Bacteria; Bacteroidetes; Saprospirae; Saprospirales                                                |
| Otu118  | 101     | 186     | 146     | 99       | 64      | 98       | 88        | 155       | 75        | 168       | 150       | 60        | Bacteria; Proteobacteria; Deltaproteobacteria; Myxococcales; Haliangiaceae                         |
| Otu119  | 88      | 2       | 0       | 167      | 11      | 9        | 98        | 7         | 19        | 2         | 1         | 87        | Bacteria; Bacteroidetes; Sphingobacteriia; Sphingobacteriales; Sphingobacteriaceae; Pedobacter     |
| Otu286  | 9       | 71      | 24      | 30       | 52      | 93       | 9         | 10        | 3         | 20        | 36        | 1         | Bacteria; Chloroflexi; Anaerolineae; SBR1031; oc28                                                 |
| Otu287  | 28      | 17      | 33      | 47       | 24      | 48       | 68        | 81        | 80        | 42        | 54        | 50        | Bacteria; Proteobacteria; Alphaproteobacteria; Rhizobiales; Hyphomicrobiaceae; Rhodoplanes         |
| Otu284  | 24      | 102     | 39      | 41       | 71      | 68       | 72        | 27        | 21        | 21        | 47        | 25        | Bacteria; Nitrospirae; Nitrospira; Nitrospirales; 0319-6A21                                        |
| Otu285  | 5       | 113     | 3       | 9        | 1       | 0        | 4         | 2         | 0         | 2         | 4         | 0         | Bacteria; Acidobacteria; Chloracidobacteria; RB41                                                  |
| Otu282  | 56      | 0       | 0       | 0        | 2       | 0        | 0         | 2         | 0         | 0         | 0         | 0         | Bacteria; Bacteroidetes; Saprospirae; Saprospirales; Chitinophagaceae                              |
| Otu283  | 28      | 26      | 35      | 63       | 25      | 98       | 37        | 33        | 41        | 18        | 34        | 48        | Bacteria; Actinobacteria; Actinobacteria; Actinomycetales; Nocardioidaceae; Nocardioides           |
| Otu280  | 44      | 7       | 84      | 58       | 9       | 84       | 10        | 14        | 2         | 3         | 0         | 42        | Bacteria; Proteobacteria; Gammaproteobacteria; Xanthomonadales; Xanthomonadaceae; Stenotrophomonas |
| Otu281  | 48      | 21      | 33      | 61       | 23      | 36       | 50        | 75        | 32        | 79        | 88        | 10        | Bacteria; Acidobacteria; Acidobacteriia; Acidobacteriales; Koribacteraceae; Candidatus_Koribacter  |
| Otu2397 | 2       | 0       | 3       | 3        | 1       | 4        | 1         | 1         | 2         | 3         | 0         | 1         | Bacteria; Proteobacteria; Deltaproteobacteria; Bdellovibrionales; Bdellovibrionaceae; Bdellovibrio |
| Otu2396 | 0       | 2       | 0       | 0        | 1       | 0        | 1         | 1         | 1         | 1         | 3         | 0         | Bacteria; BRC1; PRR-11                                                                             |
| Otu2395 | 2       | 4       | 0       | 2        | 0       | 0        | 0         | 0         | 0         | 2         | 1         | 0         | Bacteria; Actinobacteria; Actinobacteria; Actinomycetales; Nocardioidaceae                         |
| Otu2394 | 0       | 0       | 1       | 2        | 3       | 0        | 0         | 0         | 0         | 6         | 0         | 1         | Bacteria; Proteobacteria; Deltaproteobacteria; Myxococcales                                        |
| Otu2393 | 0       | 6       | 3       | 3        | 1       | 6        | 3         | 0         | 1         | 1         | 3         | 0         | Bacteria; Acidobacteria; Acidobacteria-6; iii1-15; mb2424                                          |

| #OTU ID | Z31DRh1 | Z31DRh2 | Z31DRh3 | Z31DRh4r | Z31DRh5 | Z31DRh6r | Z31J1DRh1 | Z31J1DRh2 | Z31J1DRh3 | Z31J1DRh4 | Z31J1DRh5 | Z31J1DRh6 | taxonomy                                                                                           |
|---------|---------|---------|---------|----------|---------|----------|-----------|-----------|-----------|-----------|-----------|-----------|----------------------------------------------------------------------------------------------------|
| Otu2392 | 0       | 0       | 0       | 0        | 0       | 0        | 0         | 1         | 0         | 0         | 3         | 0         | Bacteria; Bacteroidetes; Sphingobacteriia; Sphingobacteriales                                      |
| Otu288  | 53      | 0       | 5       | 44       | 13      | 63       | 2         | 6         | 0         | 1         | 4         | 39        | Bacteria; Bacteroidetes; Sphingobacteriia; Sphingobacteriales; Sphingobacteriaceae; Pedobacter     |
| Otu289  | 77      | 78      | 56      | 94       | 34      | 136      | 53        | 40        | 40        | 17        | 30        | 41        | Bacteria; Actinobacteria; Actinobacteria; Actinomycetales; Micromonosporaceae                      |
| Otu2551 | 1       | 0       | 2       | 1        | 0       | 4        | 2         | 4         | 3         | 4         | 4         | 3         | Bacteria; Planctomycetes; Phycisphaerae; WD2101                                                    |
| Otu2550 | 0       | 6       | 0       | 4        | 2       | 2        | 3         | 2         | 1         | 4         | 2         | 2         | Bacteria; Planctomycetes; Planctomycetia; Gemmatales; Gemmataceae                                  |
| Otu2553 | 0       | 1       | 0       | 0        | 0       | 2        | 1         | 1         | 3         | 0         | 0         | 1         | Bacteria; Acidobacteria; DA052; Ellin6513                                                          |
| Otu2552 | 3       | 2       | 0       | 1        | 1       | 3        | 1         | 0         | 0         | 0         | 1         | 2         | Bacteria; Gemmatimonadetes; Gemm-5                                                                 |
| Otu2555 | 3       | 6       | 2       | 2        | 1       | 8        | 1         | 2         | 1         | 0         | 1         | 0         | Bacteria; Verrucomicrobia; Opiritales; Opiritaceae                                                 |
| Otu2554 | 4       | 1       | 0       | 3        | 0       | 6        | 0         | 2         | 2         | 1         | 4         | 1         | Bacteria; Proteobacteria; Gammaproteobacteria; Xanthomonadales; Sinobacteraceae                    |
| Otu2557 | 0       | 1       | 0       | 0        | 4       | 1        | 0         | 1         | 1         | 4         | 1         | 0         | Bacteria; Proteobacteria; Deltaproteobacteria; Myxococcales                                        |
| Otu2556 | 0       | 2       | 0       | 0        | 2       | 6        | 0         | 1         | 0         | 0         | 0         | 0         | Bacteria; Proteobacteria; Deltaproteobacteria; Bdellovibrionales; Bdellovibrionaceae; Bdellovibrio |
| Otu2559 | 0       | 4       | 0       | 0        | 0       | 5        | 0         | 0         | 1         | 0         | 0         | 0         | Bacteria; Proteobacteria; Gammaproteobacteria; Legionellales; Legionellaceae                       |
| Otu2558 | 0       | 0       | 1       | 0        | 0       | 0        | 0         | 0         | 3         | 0         | 0         | 0         | Bacteria; Proteobacteria; Deltaproteobacteria; Bdellovibrionales; Bdellovibrionaceae; Bdellovibrio |
| Otu4103 | 0       | 2       | 0       | 0        | 2       | 0        | 1         | 1         | 0         | 0         | 2         | 0         | Bacteria; Acidobacteria; iii1-8; SJA-36                                                            |
| Otu4302 | 0       | 0       | 0       | 0        | 0       | 0        | 2         | 0         | 0         | 0         | 0         | 0         | Bacteria; Proteobacteria                                                                           |
| Otu4102 | 0       | 0       | 0       | 1        | 2       | 1        | 0         | 0         | 1         | 2         | 1         | 0         | Bacteria; Proteobacteria; Gammaproteobacteria; Xanthomonadales                                     |
| Otu4033 | 0       | 0       | 0       | 0        | 0       | 1        | 1         | 2         | 0         | 2         | 1         | 0         | Bacteria; Planctomycetes; Planctomycetia; Gemmatales; Gemmataceae                                  |
| Otu4240 | 1       | 0       | 1       | 0        | 0       | 1        | 2         | 0         | 1         | 1         | 1         | 1         | Bacteria; Proteobacteria; Alphaproteobacteria; Rhodospirillales; Rhodospirillaceae                 |
| Otu1929 | 0       | 3       | 3       | 0        | 2       | 4        | 1         | 2         | 3         | 2         | 3         | 1         | Bacteria; Planctomycetes; Planctomycetia; Gemmatales; Gemmataceae                                  |
| Otu1928 | 0       | 2       | 2       | 3        | 2       | 9        | 0         | 1         | 1         | 2         | 2         | 0         | Bacteria; Chloroflexi; Anaerolineae; SBR1031; oc28                                                 |
| Otu3368 | 0       | 1       | 1       | 2        | 0       | 0        | 1         | 1         | 1         | 1         | 1         | 0         | Bacteria; Actinobacteria; Thermoleophilia; Solirubrobacteriales                                    |
| Otu1921 | 7       | 2       | 4       | 5        | 1       | 0        | 0         | 2         | 0         | 1         | 3         | 2         | Bacteria; Actinobacteria; Acidimicrobia; Acidimicrobiales                                          |



| #OTU ID | Z31DRh1 | Z31DRh2 | Z31DRh3 | Z31DRh4r | Z31DRh5 | Z31DRh6r | Z31J1DRh1 | Z31J1DRh2 | Z31J1DRh3 | Z31J1DRh4 | Z31J1DRh5 | Z31J1DRh6 | taxonomy                                                                                       |
|---------|---------|---------|---------|----------|---------|----------|-----------|-----------|-----------|-----------|-----------|-----------|------------------------------------------------------------------------------------------------|
| Otu1859 | 6       | 2       | 0       | 1        | 4       | 5        | 1         | 7         | 1         | 3         | 1         | 0         | Bacteria; OD1; SM2F11                                                                          |
| Otu1923 | 1       | 5       | 0       | 5        | 2       | 5        | 2         | 0         | 0         | 0         | 0         | 2         | Bacteria; Chlamydiae; Chlamydia; Chlamydiales                                                  |
| Otu1922 | 2       | 2       | 5       | 7        | 1       | 11       | 5         | 3         | 2         | 0         | 0         | 0         | Bacteria; TM7; SC3                                                                             |
| Otu1925 | 119     | 166     | 118     | 251      | 188     | 319      | 223       | 293       | 225       | 251       | 281       | 90        | Bacteria; Acidobacteria; Acidobacteriia; Acidobacteriales; Koribacteraceae                     |
| Otu1924 | 6       | 7       | 5       | 9        | 11      | 6        | 10        | 19        | 7         | 15        | 11        | 12        | Bacteria; Actinobacteria; Thermoleophilia; Gaiellales; Gaiellaceae                             |
| Otu1927 | 0       | 4       | 0       | 0        | 2       | 0        | 0         | 0         | 0         | 0         | 4         | 0         | Bacteria; TM7; SC3                                                                             |
| Otu1858 | 0       | 0       | 1       | 3        | 2       | 10       | 0         | 1         | 0         | 3         | 1         | 0         | Bacteria; Chloroflexi; Ktedonobacteria; Ktedonobacteriales; Ktedonobacteraceae                 |
| Otu840  | 1       | 4       | 6       | 12       | 1       | 4        | 1         | 4         | 2         | 7         | 1         | 1         | Bacteria; Bacteroidetes; Saprospirae; Saprospirales; Chitinophagaceae; Segetibacter            |
| Otu841  | 0       | 11      | 3       | 1        | 12      | 3        | 4         | 0         | 5         | 0         | 17        | 1         | Bacteria; Planctomycetes; Planctomycetia; Pirellulales; Pirellulaceae                          |
| Otu842  | 0       | 1       | 1       | 1        | 0       | 5        | 0         | 10        | 23        | 0         | 6         | 0         | Bacteria; Chloroflexi; Ktedonobacteria; Thermogemmatissporales; Thermogemmatissporaceae        |
| Otu843  | 0       | 5       | 2       | 2        | 0       | 2        | 5         | 1         | 1         | 1         | 13        | 0         | Bacteria; Verrucomicrobia; Pedosphaerae; Pedosphaerales; Ellin517                              |
| Otu844  | 2       | 1       | 3       | 6        | 3       | 6        | 2         | 0         | 3         | 15        | 1         | 1         | Bacteria; Proteobacteria; Deltaproteobacteria; Myxococcales                                    |
| Otu845  | 0       | 0       | 0       | 13       | 0       | 0        | 0         | 1         | 0         | 0         | 0         | 0         | Bacteria; Proteobacteria; Gammaproteobacteria; Xanthomonadales; Sinobacteraceae; Nevskia       |
| Otu846  | 0       | 0       | 3       | 0        | 4       | 5        | 0         | 3         | 0         | 0         | 1         | 16        | Bacteria; Bacteroidetes; Sphingobacteriia; Sphingobacteriales                                  |
| Otu847  | 8       | 5       | 22      | 19       | 13      | 37       | 7         | 15        | 24        | 26        | 34        | 7         | Bacteria; Acidobacteria; Solibacteres; Solibacterales                                          |
| Otu848  | 13      | 0       | 7       | 14       | 3       | 22       | 1         | 3         | 6         | 2         | 0         | 0         | Bacteria; Planctomycetes; Phycisphaerae; WD2101                                                |
| Otu849  | 23      | 39      | 27      | 42       | 17      | 25       | 30        | 20        | 6         | 21        | 39        | 8         | Bacteria; Acidobacteria; Acidobacteria-6; iii1-15                                              |
| Otu3165 | 0       | 0       | 0       | 0        | 0       | 0        | 0         | 0         | 0         | 0         | 2         | 0         | Bacteria; Chlamydiae; Chlamydia; Chlamydiales; Rhabdochlamydiaceae; Candidatus_Rhabdochlamydia |
| Otu3164 | 0       | 0       | 0       | 2        | 0       | 0        | 0         | 0         | 0         | 0         | 0         | 0         | Bacteria; Proteobacteria; Gammaproteobacteria                                                  |
| Otu3163 | 0       | 0       | 0       | 0        | 0       | 0        | 0         | 0         | 2         | 0         | 0         | 0         | Bacteria; Planctomycetes; Planctomycetia                                                       |
| Otu3162 | 0       | 0       | 0       | 0        | 0       | 0        | 0         | 0         | 0         | 0         | 2         | 0         | Bacteria; Proteobacteria; Gammaproteobacteria; Xanthomonadales; Xanthomonadaceae               |
| Otu3161 | 0       | 0       | 0       | 0        | 2       | 1        | 2         | 0         | 0         | 1         | 4         | 1         | Bacteria; Actinobacteria; Thermoleophilia; Solirubrobacteriales                                |

| #OTU ID | Z31DRh1 | Z31DRh2 | Z31DRh3 | Z31DRh4r | Z31DRh5 | Z31DRh6r | Z31J1DRh1 | Z31J1DRh2 | Z31J1DRh3 | Z31J1DRh4 | Z31J1DRh5 | Z31J1DRh6 | taxonomy                                                                           |
|---------|---------|---------|---------|----------|---------|----------|-----------|-----------|-----------|-----------|-----------|-----------|------------------------------------------------------------------------------------|
| Otu3160 | 2       | 18      | 3       | 5        | 15      | 43       | 13        | 12        | 12        | 1         | 24        | 4         | Bacteria; Bacteroidetes; Saprospirae; Saprospirales; Chitinophagaceae              |
| Otu2790 | 2       | 0       | 0       | 0        | 0       | 0        | 0         | 0         | 0         | 0         | 0         | 0         | Bacteria; Proteobacteria; Alphaproteobacteria; Rickettsiales; mitochondria         |
| Otu4035 | 0       | 0       | 0       | 0        | 0       | 2        | 0         | 0         | 2         | 0         | 0         | 0         | Bacteria; Chlamydiae; Chlamydia; Chlamydiales; Criblamydiaceae                     |
| Otu3092 | 0       | 0       | 0       | 0        | 2       | 0        | 0         | 0         | 0         | 0         | 0         | 0         | Bacteria; Proteobacteria                                                           |
| Otu4031 | 0       | 0       | 0       | 0        | 0       | 0        | 0         | 2         | 0         | 0         | 0         | 0         | Bacteria                                                                           |
| Otu1635 | 2       | 3       | 4       | 9        | 1       | 5        | 1         | 2         | 5         | 3         | 2         | 2         | Bacteria; Proteobacteria; Alphaproteobacteria; Rhodospirillales; Rhodospirillaceae |
| Otu1583 | 1       | 1       | 8       | 3        | 2       | 7        | 5         | 5         | 5         | 8         | 6         | 4         | Bacteria; Verrucomicrobia; Spartobacteria; Chthoniobacterales; Chthoniobacteraceae |
| Otu1637 | 3       | 3       | 2       | 2        | 1       | 6        | 5         | 2         | 2         | 3         | 2         | 4         | Bacteria; Proteobacteria; Alphaproteobacteria; Rhodospirillales; Rhodospirillaceae |
| Otu1636 | 0       | 3       | 0       | 1        | 2       | 0        | 0         | 0         | 0         | 2         | 4         | 1         | Bacteria; Gemmatimonadetes; Gemmatimonadetes; Ellin5290                            |
| Otu1631 | 0       | 0       | 0       | 0        | 0       | 4        | 0         | 0         | 0         | 0         | 0         | 0         | Bacteria; Planctomycetes; Planctomycetia; Gemmatales; Isosphaeraceae               |
| Otu1630 | 1       | 1       | 0       | 0        | 0       | 0        | 1         | 0         | 0         | 5         | 1         | 0         | Bacteria; Planctomycetes; Planctomycetia; Gemmatales; Gemmataceae; Gemmata         |
| Otu1633 | 0       | 0       | 0       | 0        | 0       | 5        | 0         | 0         | 0         | 0         | 0         | 0         | Bacteria; Proteobacteria                                                           |
| Otu1582 | 2       | 0       | 1       | 7        | 0       | 0        | 0         | 0         | 0         | 0         | 0         | 0         | Bacteria; Proteobacteria; Gammaproteobacteria; Legionellales; Coxiellaceae         |
| Otu2168 | 2       | 0       | 0       | 0        | 0       | 0        | 0         | 0         | 0         | 0         | 1         | 3         | Bacteria; TM6                                                                      |
| Otu2169 | 1       | 3       | 2       | 5        | 2       | 10       | 5         | 2         | 1         | 7         | 10        | 6         | Bacteria; Elusimicrobia; Elusimicrobia; FAC88                                      |
| Otu1852 | 0       | 3       | 0       | 0        | 5       | 1        | 0         | 1         | 0         | 0         | 0         | 0         | Bacteria; Planctomycetes; Phycisphaerae; WD2101                                    |
| Otu1639 | 2       | 0       | 0       | 1        | 2       | 4        | 0         | 0         | 0         | 5         | 4         | 1         | Bacteria; Planctomycetes; vadinHA49; DH61                                          |
| Otu1581 | 3       | 4       | 3       | 9        | 3       | 9        | 7         | 13        | 4         | 9         | 10        | 2         | Bacteria; Proteobacteria; Alphaproteobacteria; Rhodospirillales; Rhodospirillaceae |
| Otu4245 | 0       | 0       | 0       | 2        | 0       | 0        | 0         | 0         | 0         | 0         | 0         | 0         | Bacteria; Actinobacteria; Actinobacteria; Actinomycetales                          |
| Otu1580 | 4       | 7       | 1       | 8        | 1       | 8        | 6         | 0         | 5         | 3         | 4         | 1         | Bacteria; Chloroflexi; TK10; B07_WMSP1                                             |
| Otu2139 | 3       | 1       | 0       | 0        | 0       | 5        | 0         | 0         | 0         | 0         | 1         | 0         | Bacteria; Cyanobacteria; 4C0d-2; SM1D11                                            |
| Otu1587 | 6       | 1       | 5       | 3        | 2       | 9        | 5         | 6         | 3         | 5         | 3         | 2         | Bacteria; Proteobacteria; Alphaproteobacteria; Rhodospirillales; Acetobacteraceae  |

| #OTU ID | Z31DRh1 | Z31DRh2 | Z31DRh3 | Z31DRh4r | Z31DRh5 | Z31DRh6r | Z31J1DRh1 | Z31J1DRh2 | Z31J1DRh3 | Z31J1DRh4 | Z31J1DRh5 | Z31J1DRh6 | taxonomy                                                                                      |
|---------|---------|---------|---------|----------|---------|----------|-----------|-----------|-----------|-----------|-----------|-----------|-----------------------------------------------------------------------------------------------|
| Otu2138 | 0       | 1       | 0       | 0        | 1       | 3        | 3         | 0         | 0         | 0         | 7         | 0         | Bacteria; Proteobacteria; Gammaproteobacteria                                                 |
| Otu1586 | 0       | 0       | 0       | 0        | 0       | 0        | 0         | 0         | 5         | 1         | 0         | 0         | Bacteria; OD1; ZB2                                                                            |
| Otu3119 | 0       | 0       | 0       | 0        | 2       | 2        | 0         | 0         | 0         | 0         | 0         | 0         | Bacteria; Firmicutes; Bacilli; Bacillales; Alicyclobacillaceae; Alicyclobacillus              |
| Otu1585 | 0       | 1       | 0       | 0        | 0       | 0        | 6         | 0         | 0         | 0         | 0         | 0         | Bacteria; Proteobacteria; Gammaproteobacteria; Legionellales                                  |
| Otu1584 | 5       | 6       | 0       | 4        | 0       | 2        | 0         | 0         | 0         | 0         | 0         | 0         | Bacteria; Acidobacteria; Chloracidobacteria; RB41; Ellin6075                                  |
| Otu4037 | 1       | 0       | 0       | 2        | 0       | 1        | 0         | 0         | 0         | 0         | 0         | 0         | Bacteria; Proteobacteria; Betaproteobacteria                                                  |
| Otu3941 | 0       | 0       | 2       | 4        | 0       | 3        | 1         | 0         | 0         | 1         | 0         | 0         | Bacteria; Armatimonadetes; Chthonomonadetes; SJA-22                                           |
| Otu3940 | 0       | 0       | 0       | 0        | 0       | 0        | 0         | 1         | 0         | 2         | 0         | 0         | Bacteria                                                                                      |
| Otu3943 | 2       | 5       | 0       | 4        | 19      | 31       | 15        | 27        | 16        | 7         | 8         | 10        | Bacteria; Proteobacteria; Alphaproteobacteria; Ellin329                                       |
| Otu3942 | 0       | 3       | 0       | 0        | 0       | 0        | 4         | 7         | 1         | 1         | 0         | 0         | Bacteria; Proteobacteria; Gammaproteobacteria; Legionellales; Coxiellaceae; Aquicella         |
| Otu3945 | 0       | 0       | 0       | 2        | 0       | 0        | 0         | 1         | 0         | 1         | 0         | 0         | Bacteria; Proteobacteria; Gammaproteobacteria; Legionellales                                  |
| Otu2399 | 1       | 2       | 2       | 1        | 0       | 0        | 4         | 2         | 0         | 1         | 1         | 0         | Bacteria                                                                                      |
| Otu3947 | 0       | 1       | 0       | 1        | 0       | 0        | 2         | 1         | 0         | 0         | 2         | 1         | Bacteria; Actinobacteria; Actinobacteria; Actinomycetales; Micromonosporaceae; Catellatospora |
| Otu3946 | 0       | 3       | 1       | 0        | 0       | 0        | 1         | 0         | 0         | 1         | 0         | 0         | Bacteria; Proteobacteria; Alphaproteobacteria; Rickettsiales; mitochondria                    |
| Otu3949 | 0       | 2       | 0       | 0        | 0       | 0        | 0         | 0         | 0         | 0         | 1         | 0         | Bacteria; Verrucomicrobia; Pedosphaerae                                                       |
| Otu2133 | 5       | 1       | 8       | 3        | 4       | 3        | 1         | 0         | 0         | 1         | 0         | 2         | Bacteria; Bacteroidetes; Flavobacteriia; Flavobacteriales; Flavobacteriaceae; Flavobacterium  |
| Otu2398 | 1       | 1       | 0       | 3        | 0       | 2        | 3         | 0         | 0         | 0         | 1         | 2         | Bacteria; Proteobacteria; Deltaproteobacteria; Myxococcales; Polyangiaceae                    |
| Otu2132 | 0       | 0       | 0       | 0        | 0       | 5        | 0         | 0         | 0         | 1         | 0         | 0         | Bacteria; Proteobacteria; Deltaproteobacteria; MIZ46                                          |
| Otu4388 | 1       | 0       | 2       | 0        | 0       | 0        | 0         | 0         | 0         | 0         | 0         | 1         | Bacteria; Planctomycetes; Phycisphaerae; WD2101                                               |
| Otu3113 | 0       | 1       | 0       | 4        | 0       | 1        | 0         | 1         | 0         | 0         | 0         | 0         | Bacteria; Planctomycetes; Planctomycetia; Gemmatales; Isosphaeraeae                           |
| Otu420  | 12      | 41      | 11      | 12       | 13      | 7        | 24        | 8         | 4         | 5         | 12        | 5         | Bacteria; Acidobacteria; S055                                                                 |
| Otu1701 | 2       | 1       | 4       | 4        | 0       | 4        | 1         | 1         | 1         | 0         | 0         | 1         | Bacteria; Chloroflexi; C0119                                                                  |

| #OTU ID | Z31DRh1 | Z31DRh2 | Z31DRh3 | Z31DRh4r | Z31DRh5 | Z31DRh6r | Z31J1DRh1 | Z31J1DRh2 | Z31J1DRh3 | Z31J1DRh4 | Z31J1DRh5 | Z31J1DRh6 | taxonomy                                                                               |
|---------|---------|---------|---------|----------|---------|----------|-----------|-----------|-----------|-----------|-----------|-----------|----------------------------------------------------------------------------------------|
| Otu1700 | 2       | 5       | 4       | 1        | 1       | 1        | 5         | 4         | 3         | 5         | 6         | 1         | Bacteria; Planctomycetes; Planctomycetia; Gemmatales; Isosphaeraceae                   |
| Otu1703 | 0       | 0       | 0       | 0        | 1       | 0        | 1         | 0         | 1         | 6         | 2         | 1         | Bacteria; Proteobacteria; Gammaproteobacteria; Legionellales                           |
| Otu1702 | 2       | 3       | 0       | 0        | 0       | 1        | 4         | 0         | 0         | 0         | 0         | 0         | Bacteria                                                                               |
| Otu1705 | 1       | 2       | 6       | 6        | 1       | 3        | 5         | 0         | 0         | 0         | 5         | 0         | Bacteria; Armatimonadetes; Chthonomonadetes; SJA-22                                    |
| Otu1704 | 0       | 0       | 7       | 0        | 3       | 1        | 1         | 0         | 0         | 0         | 0         | 0         | Bacteria; Chlorflexi; Ktedonobacteria; Thermogemmatissporales; Thermogemmatissporaceae |
| Otu1707 | 0       | 0       | 7       | 12       | 0       | 0        | 0         | 0         | 0         | 1         | 0         | 0         | Bacteria; Proteobacteria; Betaproteobacteria                                           |
| Otu1706 | 0       | 0       | 1       | 0        | 0       | 5        | 2         | 1         | 7         | 2         | 1         | 0         | Bacteria; Gemmatimonadetes; Gemmatimonadetes; Ellin5290                                |
| Otu1709 | 0       | 0       | 0       | 0        | 0       | 0        | 0         | 0         | 0         | 1         | 4         | 0         | Bacteria                                                                               |
| Otu1708 | 0       | 0       | 0       | 1        | 0       | 0        | 0         | 4         | 1         | 0         | 0         | 0         | Bacteria; Chlorflexi; Ktedonobacteria; TK10                                            |
| Otu2016 | 0       | 3       | 1       | 1        | 0       | 5        | 4         | 6         | 0         | 0         | 2         | 2         | Bacteria; Planctomycetes; Planctomycetia; Gemmatales; Gemmataceae                      |
| Otu2017 | 0       | 0       | 9       | 9        | 2       | 0        | 3         | 5         | 4         | 0         | 3         | 1         | Bacteria                                                                               |
| Otu2010 | 0       | 0       | 2       | 3        | 0       | 1        | 1         | 4         | 3         | 8         | 5         | 1         | Bacteria; OD1; SM2F11                                                                  |
| Otu2011 | 1       | 2       | 0       | 0        | 0       | 5        | 1         | 0         | 3         | 0         | 0         | 0         | Bacteria; Proteobacteria; Alphaproteobacteria; Rickettsiales                           |
| Otu2012 | 0       | 0       | 0       | 0        | 0       | 2        | 0         | 0         | 0         | 7         | 1         | 0         | Bacteria                                                                               |
| Otu2013 | 1       | 0       | 0       | 0        | 4       | 2        | 3         | 1         | 0         | 0         | 2         | 3         | Bacteria; OD1; SM2F11                                                                  |
| Otu3387 | 0       | 1       | 0       | 1        | 0       | 0        | 0         | 3         | 0         | 1         | 2         | 0         | Bacteria; Proteobacteria; Gammaproteobacteria; Legionellales; Coxiellaceae             |
| Otu3386 | 0       | 0       | 0       | 0        | 0       | 2        | 0         | 0         | 0         | 0         | 0         | 0         | Bacteria; Acidobacteria; Acidobacteria-6; iii1-15                                      |
| Otu3385 | 0       | 1       | 0       | 0        | 0       | 0        | 2         | 0         | 0         | 0         | 0         | 0         | Bacteria; Actinobacteria; Acidimicrobia; Acidimicrobiales                              |
| Otu3384 | 2       | 0       | 0       | 2        | 0       | 0        | 2         | 0         | 0         | 2         | 0         | 0         | Bacteria                                                                               |
| Otu3383 | 1       | 2       | 2       | 5        | 0       | 1        | 5         | 4         | 2         | 1         | 4         | 1         | Bacteria; Firmicutes; Clostridia; Clostridiales; Clostridiaceae; Clostridium           |
| Otu2391 | 0       | 0       | 0       | 0        | 0       | 0        | 0         | 3         | 0         | 0         | 0         | 1         | Bacteria; Planctomycetes; Planctomycetia; Gemmatales; Gemmataceae                      |
| Otu3381 | 1       | 0       | 0       | 0        | 0       | 1        | 2         | 1         | 0         | 1         | 3         | 0         | Bacteria; Proteobacteria; Deltaproteobacteria; Myxococcales                            |

| #OTU ID | Z31DRh1 | Z31DRh2 | Z31DRh3 | Z31DRh4r | Z31DRh5 | Z31DRh6r | Z31J1DRh1 | Z31J1DRh2 | Z31J1DRh3 | Z31J1DRh4 | Z31J1DRh5 | Z31J1DRh6 | taxonomy                                                                                         |
|---------|---------|---------|---------|----------|---------|----------|-----------|-----------|-----------|-----------|-----------|-----------|--------------------------------------------------------------------------------------------------|
| Otu3380 | 0       | 0       | 0       | 2        | 0       | 1        | 0         | 0         | 0         | 0         | 0         | 0         | Bacteria                                                                                         |
| Otu4039 | 1       | 0       | 0       | 0        | 0       | 0        | 0         | 0         | 0         | 0         | 2         | 0         | Bacteria; Planctomycetes; Planctomycetia; Gemmatales; Gemmataceae                                |
| Otu2390 | 3       | 0       | 0       | 0        | 0       | 0        | 0         | 0         | 0         | 0         | 0         | 0         | Bacteria; Proteobacteria; Gammaproteobacteria; Legionellales; Coxiellaceae                       |
| Otu4232 | 0       | 1       | 0       | 2        | 0       | 0        | 0         | 0         | 0         | 0         | 1         | 0         | Bacteria; Chloroflexi; TK10                                                                      |
| Otu3389 | 0       | 0       | 0       | 0        | 0       | 2        | 0         | 0         | 0         | 0         | 0         | 0         | Bacteria; TM7; TM7-1                                                                             |
| Otu3388 | 1       | 1       | 0       | 1        | 1       | 1        | 0         | 2         | 2         | 2         | 3         | 0         | Bacteria; Gemmatimonadetes; Gemmatimonadetes; Ellin5290                                          |
| Otu706  | 10      | 15      | 24      | 22       | 24      | 10       | 6         | 9         | 5         | 3         | 3         | 31        | Bacteria; Bacteroidetes; Sphingobacteria; Sphingobacteriales                                     |
| Otu3980 | 0       | 0       | 0       | 0        | 0       | 1        | 0         | 0         | 0         | 0         | 0         | 2         | Bacteria                                                                                         |
| Otu4109 | 1       | 0       | 0       | 1        | 0       | 0        | 0         | 0         | 0         | 0         | 3         | 0         | Bacteria; WS2; SHA-109                                                                           |
| Otu1446 | 0       | 1       | 3       | 0        | 5       | 6        | 1         | 0         | 1         | 0         | 0         | 1         | Bacteria; Proteobacteria; Deltaproteobacteria                                                    |
| Otu1447 | 3       | 1       | 1       | 1        | 1       | 0        | 3         | 5         | 0         | 1         | 1         | 0         | Bacteria; Proteobacteria; Alphaproteobacteria; Rhizobiales; Bradyrhizobiaceae                    |
| Otu1444 | 2       | 0       | 1       | 1        | 0       | 9        | 2         | 0         | 1         | 4         | 3         | 0         | Bacteria; Armatimonadetes; Fimbriimonadia; Fimbriimonadales; Fimbriimonadaceae; Fimbriimonas     |
| Otu1445 | 3       | 0       | 0       | 5        | 1       | 7        | 1         | 2         | 1         | 1         | 0         | 5         | Bacteria; Proteobacteria; Alphaproteobacteria                                                    |
| Otu1442 | 0       | 0       | 0       | 1        | 0       | 0        | 0         | 0         | 1         | 0         | 6         | 1         | Bacteria; OD1; ZB2                                                                               |
| Otu1443 | 2       | 1       | 4       | 5        | 12      | 6        | 6         | 5         | 7         | 4         | 9         | 3         | Bacteria; Proteobacteria; Alphaproteobacteria; Ellin329                                          |
| Otu1440 | 1       | 1       | 1       | 9        | 0       | 3        | 4         | 4         | 9         | 1         | 3         | 1         | Bacteria; Proteobacteria; Gammaproteobacteria; Legionellales; Coxiellaceae; Aquicella            |
| Otu1441 | 0       | 0       | 0       | 5        | 2       | 5        | 1         | 3         | 0         | 1         | 1         | 1         | Bacteria; Planctomycetes; Planctomycetia; Gemmatales; Gemmataceae                                |
| Otu1448 | 0       | 0       | 0       | 0        | 0       | 5        | 2         | 0         | 2         | 0         | 0         | 0         | Bacteria; Proteobacteria; Alphaproteobacteria; Rickettsiales; mitochondria                       |
| Otu1449 | 5       | 27      | 10      | 20       | 11      | 18       | 11        | 9         | 4         | 30        | 26        | 1         | Bacteria; Acidobacteria; Acidobacteria-6; iii1-15                                                |
| Otu3983 | 0       | 0       | 0       | 0        | 0       | 0        | 0         | 0         | 0         | 0         | 1         | 2         | Bacteria; TM7; TM7-1                                                                             |
| Otu4342 | 0       | 0       | 3       | 0        | 0       | 0        | 1         | 0         | 0         | 0         | 2         | 0         | Bacteria; Proteobacteria; Alphaproteobacteria; Caulobacteriales; Caulobacteraceae; Asticcacaulis |
| Otu4218 | 0       | 4       | 1       | 1        | 0       | 0        | 1         | 1         | 0         | 2         | 0         | 0         | Bacteria; Proteobacteria; Alphaproteobacteria; Rhizobiales; Hyphomicrobiaceae; Rhodoplanes       |

| #OTU ID | Z31DRh1 | Z31DRh2 | Z31DRh3 | Z31DRh4r | Z31DRh5 | Z31DRh6r | Z31J1DRh1 | Z31J1DRh2 | Z31J1DRh3 | Z31J1DRh4 | Z31J1DRh5 | Z31J1DRh6 | taxonomy                                                                          |
|---------|---------|---------|---------|----------|---------|----------|-----------|-----------|-----------|-----------|-----------|-----------|-----------------------------------------------------------------------------------|
| Otu2699 | 0       | 0       | 0       | 0        | 0       | 0        | 0         | 2         | 0         | 0         | 0         | 0         | Bacteria                                                                          |
| Otu3539 | 1       | 0       | 0       | 3        | 1       | 1        | 1         | 1         | 2         | 0         | 0         | 2         | Bacteria; Actinobacteria; Thermoleophilia; Solirubrobacterales; Conexibacteraceae |
| Otu4409 | 0       | 0       | 0       | 0        | 0       | 1        | 2         | 0         | 0         | 0         | 0         | 0         | Bacteria; Proteobacteria; Betaproteobacteria; Procabacteriales; Procabacteriaceae |
| Otu4408 | 0       | 0       | 0       | 2        | 0       | 4        | 1         | 4         | 1         | 0         | 2         | 0         | Bacteria; Proteobacteria; Alphaproteobacteria; Rhodospirillales; Acetobacteraceae |
| Otu2413 | 0       | 0       | 0       | 0        | 0       | 3        | 0         | 0         | 0         | 0         | 1         | 0         | Bacteria; Proteobacteria; Alphaproteobacteria; Rhizobiales                        |
| Otu2838 | 0       | 0       | 0       | 3        | 0       | 0        | 0         | 0         | 0         | 0         | 0         | 0         | Bacteria; TM7; TM7-1                                                              |
| Otu2839 | 4       | 7       | 6       | 9        | 3       | 10       | 12        | 10        | 15        | 23        | 8         | 12        | Bacteria; Gemmatimonadetes; Gemmatimonadetes; Ellin5290                           |
| Otu2836 | 13      | 31      | 15      | 27       | 41      | 44       | 30        | 41        | 21        | 23        | 44        | 6         | Bacteria; Proteobacteria; Deltaproteobacteria; Myxococcales; Haliangiaceae        |
| Otu2837 | 1       | 1       | 0       | 0        | 2       | 0        | 2         | 0         | 0         | 0         | 3         | 0         | Bacteria; Planctomycetes; BD7-11                                                  |
| Otu2834 | 0       | 0       | 0       | 0        | 0       | 2        | 0         | 0         | 0         | 0         | 0         | 0         | Bacteria; Acidobacteria; Chloracidobacteria; RB41; Ellin6075                      |
| Otu2835 | 0       | 0       | 1       | 1        | 2       | 10       | 1         | 6         | 3         | 3         | 3         | 1         | Bacteria; Elusimicrobia; Elusimicrobia; FAC88                                     |
| Otu2832 | 0       | 0       | 2       | 2        | 0       | 2        | 4         | 0         | 0         | 2         | 0         | 0         | Bacteria; Firmicutes; Bacilli; Bacillales; Alicyclobacillaceae; Alicyclobacillus  |
| Otu2833 | 0       | 0       | 0       | 0        | 0       | 0        | 0         | 2         | 0         | 0         | 0         | 0         | Bacteria; Firmicutes; Bacilli; Bacillales; Paenibacillaceae; Paenibacillus        |
| Otu2830 | 0       | 2       | 0       | 0        | 0       | 0        | 0         | 0         | 0         | 0         | 0         | 0         | Bacteria; Planctomycetes; Planctomycetia; Gemmatales; Isosphaeraceae              |
| Otu2831 | 0       | 2       | 0       | 0        | 0       | 0        | 0         | 0         | 0         | 0         | 0         | 0         | Bacteria; Verrucomicrobia; Pedosphaerae; Pedosphaerales; Ellin515                 |
| Otu3667 | 2       | 0       | 0       | 0        | 0       | 0        | 1         | 0         | 0         | 3         | 0         | 0         | Bacteria; Bacteroidetes                                                           |
| Otu3141 | 0       | 0       | 0       | 0        | 0       | 2        | 0         | 0         | 0         | 0         | 0         | 0         | Bacteria; Planctomycetes; Planctomycetia; Gemmatales; Isosphaeraceae              |
| Otu4216 | 1       | 0       | 0       | 2        | 0       | 3        | 2         | 0         | 3         | 1         | 3         | 0         | Bacteria; Proteobacteria; Deltaproteobacteria; Myxococcales                       |
| Otu4371 | 6       | 0       | 4       | 0        | 0       | 4        | 1         | 0         | 0         | 2         | 0         | 1         | Bacteria; Acidobacteria; Acidobacteriia; Acidobacteriales; Koribacteraceae        |
| Otu3537 | 37      | 59      | 28      | 19       | 25      | 63       | 42        | 71        | 30        | 41        | 39        | 15        | Bacteria; Proteobacteria; Deltaproteobacteria; Myxococcales                       |
| Otu4210 | 0       | 2       | 0       | 0        | 0       | 0        | 0         | 0         | 0         | 0         | 0         | 0         | Bacteria; Gemmatimonadetes                                                        |
| Otu3666 | 0       | 0       | 0       | 0        | 0       | 1        | 0         | 0         | 0         | 0         | 2         | 0         | Bacteria; Proteobacteria; Betaproteobacteria                                      |

| #OTU ID | Z31DRh1 | Z31DRh2 | Z31DRh3 | Z31DRh4r | Z31DRh5 | Z31DRh6r | Z31J1DRh1 | Z31J1DRh2 | Z31J1DRh3 | Z31J1DRh4 | Z31J1DRh5 | Z31J1DRh6 | taxonomy                                                                                       |
|---------|---------|---------|---------|----------|---------|----------|-----------|-----------|-----------|-----------|-----------|-----------|------------------------------------------------------------------------------------------------|
| Otu4211 | 0       | 0       | 2       | 0        | 0       | 0        | 0         | 0         | 0         | 0         | 0         | 0         | Bacteria; Proteobacteria; Alphaproteobacteria; Rhodospirillales; Acetobacteraceae              |
| Otu2942 | 0       | 2       | 1       | 2        | 0       | 0        | 1         | 0         | 0         | 0         | 0         | 0         | Bacteria; Bacteroidetes; Saprospirae; Saprospirales; Chitinophagaceae; Sediminibacterium       |
| Otu2943 | 3       | 0       | 0       | 0        | 0       | 0        | 0         | 0         | 1         | 0         | 0         | 0         | Bacteria; Proteobacteria; Deltaproteobacteria; Myxococcales; OM27                              |
| Otu2940 | 12      | 2       | 0       | 2        | 0       | 10       | 1         | 0         | 0         | 0         | 0         | 0         | Bacteria; Cyanobacteria; Nostocophycidae; Nostocales; Nostocaceae                              |
| Otu2941 | 2       | 14      | 5       | 4        | 4       | 4        | 13        | 3         | 7         | 7         | 8         | 5         | Bacteria; Proteobacteria; Betaproteobacteria; SC-I-84                                          |
| Otu2946 | 2       | 0       | 3       | 2        | 0       | 1        | 0         | 0         | 1         | 0         | 2         | 0         | Bacteria; Proteobacteria; Deltaproteobacteria; Myxococcales                                    |
| Otu2947 | 0       | 0       | 0       | 0        | 0       | 0        | 0         | 0         | 1         | 0         | 0         | 2         | Bacteria; Proteobacteria; Alphaproteobacteria; BD7-3                                           |
| Otu2944 | 0       | 2       | 1       | 2        | 3       | 2        | 0         | 1         | 0         | 3         | 8         | 1         | Bacteria; OP3; koll11                                                                          |
| Otu2945 | 1       | 5       | 0       | 2        | 1       | 5        | 3         | 0         | 0         | 3         | 3         | 0         | Bacteria; Chloroflexi; Thermomicrobia; JG30-KF-CM45                                            |
| Otu2948 | 2       | 2       | 0       | 1        | 1       | 3        | 1         | 5         | 4         | 1         | 1         | 2         | Bacteria; Chloroflexi; TK10                                                                    |
| Otu2949 | 0       | 0       | 0       | 0        | 0       | 0        | 0         | 0         | 2         | 0         | 0         | 0         | Bacteria; Chloroflexi; Anaerolineae; SJA-15                                                    |
| Otu4370 | 0       | 0       | 0       | 0        | 0       | 2        | 1         | 0         | 0         | 0         | 0         | 0         | Bacteria; Proteobacteria; Deltaproteobacteria; FAC87                                           |
| Otu3563 | 0       | 5       | 0       | 0        | 0       | 0        | 0         | 0         | 0         | 0         | 0         | 0         | Bacteria; Acidobacteria; Acidobacteria-6; iii1-15                                              |
| Otu3562 | 1       | 2       | 1       | 2        | 0       | 1        | 1         | 1         | 0         | 2         | 2         | 1         | Bacteria; Actinobacteria; Actinobacteria; Actinomycetales; Kineosporiaceae                     |
| Otu3561 | 1       | 2       | 0       | 0        | 0       | 0        | 1         | 1         | 3         | 1         | 2         | 0         | Bacteria; TM7; SC3                                                                             |
| Otu3560 | 1       | 0       | 0       | 3        | 0       | 6        | 3         | 3         | 1         | 1         | 0         | 2         | Bacteria; Proteobacteria; Alphaproteobacteria; Caulobacteriales; Caulobacteraceae              |
| Otu3567 | 0       | 0       | 0       | 0        | 0       | 0        | 0         | 0         | 0         | 0         | 0         | 2         | Bacteria; Proteobacteria                                                                       |
| Otu3566 | 0       | 3       | 5       | 1        | 1       | 0        | 0         | 2         | 0         | 0         | 0         | 1         | Bacteria; Planctomycetes; Planctomycetia; Gemmatales; Gemmataceae                              |
| Otu3565 | 0       | 1       | 0       | 0        | 1       | 0        | 0         | 0         | 0         | 0         | 0         | 2         | Bacteria; Chlamydiae; Chlamydia; Chlamydiales; Rhabdochlamydiaceae; Candidatus_Rhabdochlamydia |
| Otu3564 | 1       | 1       | 0       | 0        | 0       | 2        | 0         | 3         | 0         | 1         | 1         | 0         | Bacteria                                                                                       |
| Otu3569 | 0       | 0       | 0       | 0        | 0       | 0        | 0         | 0         | 0         | 0         | 3         | 0         | Bacteria; Proteobacteria; Deltaproteobacteria; Syntrophobacteriales; Syntrophobacteraceae      |
| Otu3568 | 0       | 0       | 0       | 2        | 0       | 0        | 0         | 0         | 0         | 0         | 0         | 0         | Bacteria; Proteobacteria; Alphaproteobacteria; Rhodospirillales; Rhodospirillaceae             |

| #OTU ID | Z31DRh1 | Z31DRh2 | Z31DRh3 | Z31DRh4r | Z31DRh5 | Z31DRh6r | Z31J1DRh1 | Z31J1DRh2 | Z31J1DRh3 | Z31J1DRh4 | Z31J1DRh5 | Z31J1DRh6 | taxonomy                                                                                                  |
|---------|---------|---------|---------|----------|---------|----------|-----------|-----------|-----------|-----------|-----------|-----------|-----------------------------------------------------------------------------------------------------------|
| Otu4085 | 0       | 0       | 0       | 2        | 0       | 1        | 0         | 0         | 0         | 0         | 0         | 0         | Bacteria; Chloroflexi; TK17                                                                               |
| Otu4084 | 0       | 2       | 0       | 0        | 0       | 0        | 1         | 0         | 0         | 0         | 1         | 0         | Bacteria; Acidobacteria; S035                                                                             |
| Otu4087 | 0       | 0       | 0       | 2        | 0       | 0        | 0         | 0         | 0         | 0         | 0         | 0         | Bacteria; Firmicutes; Clostridia; Clostridiales; Ruminococcaceae; Oscillospira                            |
| Otu4086 | 0       | 0       | 1       | 4        | 0       | 1        | 0         | 0         | 0         | 2         | 1         | 0         | Bacteria; OD1; ZB2                                                                                        |
| Otu4081 | 0       | 0       | 0       | 2        | 0       | 0        | 0         | 0         | 0         | 0         | 0         | 0         | Bacteria                                                                                                  |
| Otu4080 | 0       | 0       | 0       | 0        | 0       | 0        | 2         | 0         | 0         | 0         | 0         | 0         | Bacteria; Proteobacteria; Gammaproteobacteria; Legionellales; Legionellaceae                              |
| Otu4083 | 0       | 2       | 0       | 0        | 0       | 0        | 0         | 0         | 0         | 0         | 0         | 0         | Bacteria; Verrucomicrobia; Pedosphaerae; Pedosphaerales; Ellin517                                         |
| Otu4082 | 0       | 3       | 2       | 2        | 4       | 1        | 0         | 1         | 1         | 2         | 6         | 2         | Bacteria; Actinobacteria; Thermoleophilia; Gaiellales; Gaiellaceae                                        |
| Otu538  | 13      | 29      | 15      | 13       | 17      | 29       | 46        | 68        | 46        | 25        | 12        | 8         | Bacteria; Bacteroidetes; Saprospirae; Saprospirales; Chitinophagaceae                                     |
| Otu4251 | 2       | 1       | 2       | 1        | 6       | 3        | 0         | 1         | 3         | 1         | 1         | 0         | Bacteria; Planctomycetes; Planctomycetia; Pirellulales; Pirellulaceae; Pirellula                          |
| Otu3571 | 0       | 0       | 0       | 6        | 0       | 3        | 0         | 0         | 0         | 0         | 1         | 0         | Bacteria; Firmicutes; Bacilli; Bacillales; Paenibacillaceae; Paenibacillus                                |
| Otu4088 | 0       | 0       | 0       | 2        | 0       | 0        | 0         | 1         | 0         | 0         | 0         | 0         | Bacteria; Cyanobacteria; Chloroplast; Chlorophyta; Chlamydomonadaceae; Dunaliella; Dunaliella_tertiolecta |
| Otu539  | 15      | 21      | 16      | 26       | 3       | 10       | 8         | 13        | 4         | 29        | 11        | 10        | Bacteria; Gemmatimonadetes; Gemmatimonadetes; N1423WL                                                     |
| Otu2262 | 5       | 3       | 0       | 1        | 0       | 0        | 3         | 0         | 0         | 2         | 9         | 0         | Bacteria; Gemmatimonadetes; Gemmatimonadetes; Ellin5290                                                   |
| Otu2617 | 0       | 0       | 0       | 0        | 0       | 2        | 0         | 0         | 0         | 0         | 0         | 0         | Bacteria; Planctomycetes; Planctomycetia; Gemmatales; Isosphaeraceae                                      |
| Otu4376 | 0       | 2       | 0       | 0        | 0       | 0        | 0         | 1         | 1         | 0         | 0         | 2         | Bacteria; Proteobacteria; Gammaproteobacteria; Legionellales                                              |
| Otu3781 | 0       | 0       | 1       | 1        | 2       | 1        | 3         | 0         | 0         | 2         | 0         | 0         | Bacteria; Proteobacteria; Gammaproteobacteria                                                             |
| Otu2766 | 8       | 6       | 4       | 8        | 2       | 5        | 10        | 6         | 3         | 4         | 4         | 0         | Bacteria; Proteobacteria; Alphaproteobacteria; Caulobacteriales; Caulobacteraceae; Phenylobacterium       |
| Otu2767 | 1       | 3       | 1       | 0        | 1       | 2        | 0         | 1         | 0         | 1         | 2         | 0         | Bacteria; Planctomycetes; Planctomycetia; Gemmatales; Isosphaeraceae                                      |
| Otu2764 | 0       | 1       | 1       | 1        | 0       | 4        | 0         | 0         | 0         | 0         | 0         | 0         | Bacteria; Bacteroidetes; Cytophagia; Cytophagales; Cytophagaceae                                          |
| Otu2765 | 0       | 0       | 0       | 0        | 0       | 3        | 0         | 1         | 0         | 0         | 0         | 0         | Bacteria; Chloroflexi; Ktedonobacteria; JG30-KF-AS9                                                       |
| Otu2762 | 70      | 55      | 47      | 79       | 31      | 94       | 52        | 28        | 17        | 101       | 27        | 6         | Bacteria; Acidobacteria; Chloracidobacteria; RB41; Ellin6075                                              |



| #OTU ID | Z31DRh1 | Z31DRh2 | Z31DRh3 | Z31DRh4r | Z31DRh5 | Z31DRh6r | Z31J1DRh1 | Z31J1DRh2 | Z31J1DRh3 | Z31J1DRh4 | Z31J1DRh5 | Z31J1DRh6 | taxonomy                                                                                    |
|---------|---------|---------|---------|----------|---------|----------|-----------|-----------|-----------|-----------|-----------|-----------|---------------------------------------------------------------------------------------------|
| Otu2763 | 0       | 0       | 0       | 0        | 2       | 0        | 0         | 0         | 0         | 0         | 0         | 0         | Bacteria; Planctomycetes; Planctomycetia; Gemmatales; Isosphaeraceae                        |
| Otu2760 | 0       | 3       | 0       | 3        | 3       | 0        | 1         | 2         | 0         | 2         | 3         | 1         | Bacteria; Proteobacteria; Alphaproteobacteria; Rhodospirillales; Rhodospirillaceae          |
| Otu2761 | 0       | 0       | 0       | 0        | 2       | 0        | 0         | 0         | 0         | 0         | 0         | 0         | Bacteria; Chloroflexi                                                                       |
| Otu530  | 36      | 23      | 27      | 29       | 41      | 91       | 25        | 18        | 10        | 34        | 16        | 6         | Bacteria; Chloroflexi; Chloroflexi; Roseiflexales; Kouleothrixaceae                         |
| Otu4343 | 0       | 1       | 0       | 0        | 0       | 0        | 0         | 0         | 0         | 0         | 0         | 2         | Bacteria; Proteobacteria; Gammaproteobacteria; Legionellales                                |
| Otu2768 | 4       | 0       | 2       | 1        | 2       | 1        | 0         | 0         | 0         | 2         | 0         | 5         | Bacteria; Proteobacteria; Alphaproteobacteria; Sphingomonadales; Sphingomonadaceae          |
| Otu531  | 1       | 26      | 0       | 0        | 2       | 14       | 0         | 3         | 8         | 3         | 5         | 3         | Bacteria; Verrucomicrobia; Opitutae; Cerasicoccales; Cerasicocaceae                         |
| Otu3499 | 0       | 0       | 0       | 2        | 0       | 0        | 0         | 0         | 0         | 0         | 0         | 0         | Bacteria; OD1; ZB2                                                                          |
| Otu4214 | 2       | 0       | 0       | 0        | 0       | 0        | 0         | 2         | 0         | 0         | 0         | 1         | Bacteria; Chlamydiae; Chlamydia; Chlamydiales; Parachlamydiaceae                            |
| Otu3780 | 0       | 0       | 0       | 0        | 0       | 2        | 0         | 0         | 0         | 1         | 0         | 0         | Bacteria                                                                                    |
| Otu471  | 0       | 0       | 0       | 0        | 14      | 36       | 1         | 27        | 6         | 0         | 0         | 3         | Bacteria; Acidobacteria; DA052; Ellin6513                                                   |
| Otu470  | 0       | 0       | 2       | 3        | 1       | 1        | 8         | 36        | 1         | 1         | 11        | 0         | Bacteria; Proteobacteria; Alphaproteobacteria; Rhizobiales                                  |
| Otu473  | 2       | 0       | 0       | 6        | 1       | 9        | 5         | 15        | 9         | 4         | 5         | 44        | Bacteria; Acidobacteria; Holophagae; Holophagales; Holophagaceae                            |
| Otu472  | 20      | 39      | 11      | 5        | 2       | 22       | 10        | 11        | 4         | 4         | 18        | 0         | Bacteria; Proteobacteria; Deltaproteobacteria; Myxococcales                                 |
| Otu475  | 11      | 22      | 14      | 52       | 10      | 32       | 14        | 6         | 7         | 41        | 8         | 1         | Bacteria; Gemmatimonadetes; Gemmatimonadetes; N1423WL                                       |
| Otu474  | 5       | 5       | 9       | 13       | 22      | 71       | 10        | 11        | 11        | 16        | 10        | 14        | Bacteria; Actinobacteria; Actinobacteria; Actinomycetales                                   |
| Otu477  | 23      | 16      | 32      | 29       | 13      | 14       | 21        | 17        | 22        | 30        | 27        | 4         | Bacteria; Proteobacteria; Deltaproteobacteria; Myxococcales                                 |
| Otu476  | 0       | 2       | 5       | 0        | 12      | 37       | 2         | 0         | 4         | 0         | 2         | 0         | Bacteria; Proteobacteria; Betaproteobacteria; Neisseriales; Neisseriaceae; Elbe; Elbe_Iso18 |
| Otu479  | 10      | 7       | 1       | 36       | 1       | 17       | 5         | 22        | 16        | 2         | 14        | 21        | Bacteria; Proteobacteria; Alphaproteobacteria; Rickettsiales; mitochondria                  |
| Otu478  | 1       | 35      | 10      | 10       | 21      | 1        | 16        | 1         | 3         | 4         | 35        | 3         | Bacteria; Verrucomicrobia; Pedosphaerae; Pedosphaerales                                     |
| Otu1158 | 0       | 0       | 1       | 7        | 3       | 9        | 3         | 6         | 3         | 0         | 2         | 0         | Bacteria; Acidobacteria; Acidobacteriia; Acidobacteriales; Koribacteraceae                  |
| Otu1159 | 6       | 5       | 5       | 7        | 3       | 5        | 8         | 9         | 6         | 1         | 3         | 7         | Bacteria; Proteobacteria; Betaproteobacteria                                                |

| #OTU ID | Z31DRh1 | Z31DRh2 | Z31DRh3 | Z31DRh4r | Z31DRh5 | Z31DRh6r | Z31J1DRh1 | Z31J1DRh2 | Z31J1DRh3 | Z31J1DRh4 | Z31J1DRh5 | Z31J1DRh6 | taxonomy                                                                                          |
|---------|---------|---------|---------|----------|---------|----------|-----------|-----------|-----------|-----------|-----------|-----------|---------------------------------------------------------------------------------------------------|
| Otu3491 | 4       | 1       | 0       | 4        | 0       | 9        | 1         | 2         | 1         | 6         | 0         | 2         | Bacteria; Proteobacteria; Alphaproteobacteria; Rhizobiales                                        |
| Otu4117 | 0       | 2       | 0       | 0        | 0       | 0        | 0         | 0         | 0         | 0         | 0         | 0         | Bacteria; Proteobacteria; Gammaproteobacteria; Legionellales; Legionellaceae                      |
| Otu1150 | 2       | 3       | 8       | 7        | 23      | 10       | 6         | 6         | 1         | 27        | 5         | 2         | Bacteria; Gemmatimonadetes; Gemmatimonadetes; N1423WL                                             |
| Otu1151 | 9       | 6       | 8       | 3        | 4       | 14       | 8         | 5         | 4         | 3         | 8         | 6         | Bacteria; Proteobacteria; Alphaproteobacteria; Rhodospirillales; Rhodospirillaceae; Skermanella   |
| Otu1152 | 0       | 3       | 2       | 0        | 4       | 1        | 0         | 2         | 0         | 4         | 8         | 0         | Bacteria; Bacteroidetes; Sphingobacteriia; Sphingobacteriales                                     |
| Otu1153 | 2       | 6       | 3       | 8        | 7       | 15       | 12        | 0         | 2         | 9         | 15        | 3         | Bacteria; Proteobacteria; Deltaproteobacteria; Myxococcales                                       |
| Otu1154 | 15      | 5       | 17      | 56       | 10      | 38       | 14        | 2         | 8         | 17        | 2         | 6         | Bacteria; Acidobacteria; Acidobacteriia; Acidobacteriales; Acidobacteriaceae; Terriglobus         |
| Otu1155 | 0       | 0       | 0       | 0        | 0       | 11       | 0         | 0         | 0         | 0         | 0         | 0         | Bacteria; Cyanobacteria; 4C0d-2; SM1D11                                                           |
| Otu1156 | 0       | 0       | 0       | 0        | 0       | 0        | 10        | 0         | 0         | 0         | 0         | 1         | Bacteria; Firmicutes; Clostridia; Clostridiales; Veillonellaceae; Veillonella; Veillonella_dispar |
| Otu1157 | 4       | 4       | 3       | 3        | 5       | 7        | 3         | 7         | 4         | 3         | 9         | 4         | Bacteria; Acidobacteria; Solibacteres; Solibacterales                                             |
| Otu619  | 8       | 35      | 15      | 15       | 5       | 18       | 31        | 10        | 5         | 9         | 29        | 6         | Bacteria; Actinobacteria; Actinobacteria; Actinomycetales; Micromonosporaceae; Catellatospora     |
| Otu618  | 4       | 6       | 11      | 4        | 5       | 9        | 7         | 2         | 2         | 2         | 25        | 0         | Bacteria; Actinobacteria; Acidimicrobia; Acidimicrobiales; C111                                   |
| Otu2492 | 0       | 0       | 0       | 0        | 0       | 0        | 0         | 3         | 0         | 0         | 0         | 0         | Bacteria                                                                                          |
| Otu2493 | 0       | 0       | 3       | 0        | 0       | 0        | 0         | 0         | 0         | 0         | 0         | 1         | Bacteria; Proteobacteria; Gammaproteobacteria                                                     |
| Otu2495 | 0       | 1       | 0       | 3        | 0       | 0        | 5         | 0         | 0         | 0         | 1         | 0         | Bacteria; Acidobacteria; iii1-8; DS-18                                                            |
| Otu2496 | 0       | 1       | 0       | 1        | 0       | 3        | 3         | 2         | 1         | 7         | 5         | 0         | Bacteria; Chloroflexi; TK10; B07_WMSP1                                                            |
| Otu2497 | 1       | 0       | 0       | 4        | 3       | 0        | 1         | 2         | 0         | 1         | 2         | 0         | Bacteria; Proteobacteria; Deltaproteobacteria; Myxococcales                                       |
| Otu611  | 8       | 12      | 9       | 8        | 12      | 3        | 4         | 9         | 4         | 24        | 12        | 1         | Bacteria; Bacteroidetes; Sphingobacteriia; Sphingobacteriales                                     |
| Otu610  | 21      | 10      | 16      | 33       | 6       | 16       | 15        | 5         | 22        | 16        | 14        | 7         | Bacteria; Proteobacteria; Deltaproteobacteria; Myxococcales                                       |
| Otu613  | 11      | 16      | 14      | 18       | 8       | 17       | 21        | 9         | 6         | 13        | 35        | 1         | Bacteria; Chloroflexi; Anaerolineae; SHA-20                                                       |
| Otu612  | 4       | 6       | 19      | 22       | 0       | 6        | 9         | 26        | 11        | 7         | 6         | 2         | Bacteria; Planctomycetes; Phycisphaerae; WD2101                                                   |
| Otu615  | 1       | 11      | 2       | 26       | 3       | 3        | 17        | 15        | 11        | 0         | 8         | 3         | Bacteria; Chlamydiae; Chlamydia; Chlamydiales                                                     |

| #OTU ID | Z31DRh1 | Z31DRh2 | Z31DRh3 | Z31DRh4r | Z31DRh5 | Z31DRh6r | Z31J1DRh1 | Z31J1DRh2 | Z31J1DRh3 | Z31J1DRh4 | Z31J1DRh5 | Z31J1DRh6 | taxonomy                                                                                          |
|---------|---------|---------|---------|----------|---------|----------|-----------|-----------|-----------|-----------|-----------|-----------|---------------------------------------------------------------------------------------------------|
| Otu614  | 21      | 16      | 15      | 25       | 15      | 24       | 15        | 24        | 13        | 12        | 12        | 26        | Bacteria; Proteobacteria; Alphaproteobacteria; Rhodospirillales; Rhodospirillaceae                |
| Otu617  | 6       | 13      | 11      | 11       | 8       | 20       | 5         | 12        | 19        | 5         | 9         | 9         | Bacteria; Bacteroidetes; Saprospirae; Saprospirales; Chitinophagaceae; Flavisolibacter            |
| Otu616  | 8       | 3       | 4       | 8        | 5       | 25       | 3         | 4         | 1         | 0         | 6         | 2         | Bacteria; Bacteroidetes; Cytophagia; Cytophagales; Cytophagaceae; Spirosoma                       |
| Otu4116 | 1       | 5       | 1       | 2        | 0       | 0        | 0         | 1         | 0         | 1         | 1         | 0         | Bacteria; Proteobacteria; Deltaproteobacteria; Myxococcales                                       |
| Otu3871 | 4       | 0       | 0       | 1        | 0       | 0        | 0         | 0         | 0         | 0         | 0         | 0         | Bacteria; Bacteroidetes; Saprospirae; Saprospirales; Chitinophagaceae                             |
| Otu3206 | 2       | 0       | 0       | 3        | 0       | 8        | 0         | 0         | 2         | 0         | 4         | 0         | Bacteria; Cyanobacteria; 4C0d-2; MLE1-12                                                          |
| Otu3709 | 0       | 0       | 0       | 0        | 0       | 0        | 0         | 0         | 2         | 0         | 0         | 0         | Bacteria; Chloroflexi; Ktedonobacteria                                                            |
| Otu3708 | 0       | 0       | 0       | 1        | 1       | 1        | 0         | 0         | 0         | 0         | 3         | 0         | Bacteria; Proteobacteria; Alphaproteobacteria; Rhodospirillales; Rhodospirillaceae                |
| Otu3703 | 0       | 1       | 0       | 2        | 0       | 0        | 0         | 0         | 0         | 0         | 0         | 0         | Bacteria; Planctomycetes; Planctomycetia; Gemmatales; Gemmataceae; Gemmata                        |
| Otu3702 | 0       | 0       | 0       | 0        | 2       | 0        | 0         | 0         | 0         | 0         | 0         | 0         | Bacteria; Bacteroidetes; Flavobacteriia; Flavobacteriales; Blattabacteriaceae                     |
| Otu3701 | 6       | 0       | 2       | 4        | 6       | 8        | 2         | 2         | 1         | 8         | 3         | 11        | Bacteria; Proteobacteria; Betaproteobacteria; Burkholderiales; Comamonadaceae                     |
| Otu3700 | 0       | 0       | 0       | 5        | 2       | 4        | 0         | 0         | 1         | 1         | 1         | 0         | Bacteria; Tenericutes; Mollicutes; Anaeroplasmatales; Anaeroplasmataceae; Asteroleplasma          |
| Otu3707 | 0       | 0       | 2       | 0        | 0       | 0        | 0         | 0         | 0         | 0         | 0         | 0         | Bacteria                                                                                          |
| Otu3706 | 0       | 0       | 0       | 0        | 0       | 0        | 0         | 0         | 0         | 0         | 2         | 0         | Bacteria; Proteobacteria                                                                          |
| Otu3705 | 0       | 0       | 0       | 0        | 0       | 0        | 0         | 3         | 0         | 0         | 0         | 0         | Bacteria; Proteobacteria; Deltaproteobacteria; Myxococcales                                       |
| Otu3704 | 2       | 3       | 2       | 8        | 11      | 14       | 5         | 5         | 6         | 8         | 25        | 1         | Bacteria; Acidobacteria; Acidobacteriia; Acidobacteriales; Koribacteraceae; Candidatus_Koribacter |
| Otu4115 | 0       | 0       | 0       | 0        | 0       | 0        | 0         | 0         | 0         | 0         | 2         | 0         | Bacteria; Verrucomicrobia; Verrucomicrobiae; Verrucomicrobiales; Verrucomicrobiaceae              |
| Otu279  | 17      | 72      | 20      | 20       | 25      | 29       | 18        | 9         | 8         | 17        | 14        | 3         | Bacteria; Acidobacteria; Chloracidobacteria; RB41; Ellin6075                                      |
| Otu278  | 11      | 6       | 49      | 51       | 82      | 67       | 31        | 26        | 62        | 62        | 40        | 10        | Bacteria; Bacteroidetes; Saprospirae; Saprospirales; Chitinophagaceae; Flavisolibacter            |
| Otu273  | 53      | 14      | 2       | 12       | 16      | 25       | 0         | 8         | 8         | 3         | 2         | 63        | Bacteria; Bacteroidetes; Cytophagia; Cytophagales; Cytophagaceae; Emticicia                       |
| Otu272  | 5       | 30      | 24      | 17       | 15      | 27       | 40        | 38        | 17        | 9         | 68        | 6         | Bacteria; Gemmatimonadetes; Gemm-1                                                                |
| Otu271  | 30      | 39      | 38      | 113      | 51      | 212      | 77        | 178       | 102       | 90        | 99        | 58        | Bacteria; Acidobacteria; Solibacteres; Solibacterales; Solibacteraceae; Candidatus_Solibacter     |

| #OTU ID | Z31DRh1 | Z31DRh2 | Z31DRh3 | Z31DRh4r | Z31DRh5 | Z31DRh6r | Z31J1DRh1 | Z31J1DRh2 | Z31J1DRh3 | Z31J1DRh4 | Z31J1DRh5 | Z31J1DRh6 | taxonomy                                                                                                          |
|---------|---------|---------|---------|----------|---------|----------|-----------|-----------|-----------|-----------|-----------|-----------|-------------------------------------------------------------------------------------------------------------------|
| Otu270  | 35      | 27      | 60      | 61       | 6       | 75       | 38        | 24        | 39        | 6         | 10        | 48        | Bacteria; Actinobacteria; Actinobacteria; Actinomycetales; Pseudonocardiales                                      |
| Otu277  | 1       | 12      | 6       | 13       | 4       | 4        | 32        | 5         | 3         | 34        | 6         | 88        | Bacteria; Firmicutes; Bacilli; Bacillales; Paenibacillaceae; Paenibacillus; Paenibacillus_chondroitinus           |
| Otu276  | 59      | 38      | 45      | 146      | 46      | 115      | 66        | 68        | 72        | 54        | 29        | 73        | Bacteria; Bacteroidetes; Saprospirae; Saprospirales; Chitinophagaceae                                             |
| Otu275  | 13      | 17      | 12      | 3        | 24      | 60       | 6         | 10        | 8         | 4         | 16        | 0         | Bacteria; Verrucomicrobia; Pedosphaerae; Pedosphaerales                                                           |
| Otu274  | 36      | 3       | 5       | 50       | 59      | 14       | 3         | 18        | 0         | 0         | 7         | 1         | Bacteria; Bacteroidetes                                                                                           |
| Otu105  | 44      | 61      | 97      | 126      | 75      | 190      | 25        | 30        | 54        | 3         | 53        | 21        | Bacteria; Bacteroidetes; Saprospirae; Saprospirales; Chitinophagaceae                                             |
| Otu104  | 248     | 149     | 187     | 308      | 150     | 339      | 355       | 416       | 245       | 256       | 242       | 103       | Bacteria; Acidobacteria; Acidobacteriia; Acidobacteriales; Acidobacteriaceae                                      |
| Otu107  | 27      | 12      | 27      | 96       | 18      | 242      | 44        | 16        | 9         | 15        | 5         | 5         | Bacteria; Bacteroidetes; Saprospirae; Saprospirales; Chitinophagaceae                                             |
| Otu106  | 64      | 89      | 127     | 139      | 92      | 219      | 96        | 154       | 139       | 82        | 130       | 146       | Bacteria; Proteobacteria; Betaproteobacteria; SC-I-84                                                             |
| Otu101  | 149     | 1       | 2       | 0        | 8       | 1        | 3         | 0         | 1         | 0         | 0         | 1         | Bacteria; Proteobacteria; Deltaproteobacteria; Myxococcales; Nannocystaceae; Nannocystis; Nannocystis_exedens     |
| Otu100  | 113     | 110     | 160     | 275      | 92      | 268      | 217       | 330       | 279       | 160       | 202       | 116       | Bacteria; Acidobacteria; Acidobacteriia; Acidobacteriales; Acidobacteriaceae                                      |
| Otu103  | 133     | 116     | 189     | 202      | 118     | 89       | 170       | 196       | 162       | 234       | 204       | 118       | Bacteria; Proteobacteria; Alphaproteobacteria; Sphingomonadales; Sphingomonadaceae; Kaistobacter                  |
| Otu102  | 80      | 113     | 94      | 121      | 102     | 101      | 205       | 148       | 90        | 176       | 147       | 55        | Bacteria; Acidobacteria; Acidobacteriia; Acidobacteriales; Koribacteraceae; Candidatus_Koribacter                 |
| Otu1842 | 0       | 4       | 2       | 0        | 1       | 4        | 0         | 3         | 1         | 2         | 3         | 0         | Bacteria                                                                                                          |
| Otu1843 | 0       | 0       | 0       | 0        | 0       | 0        | 1         | 1         | 5         | 1         | 7         | 1         | Bacteria; Chlamydiae; Chlamydia; Chlamydiales                                                                     |
| Otu1840 | 6       | 0       | 0       | 0        | 0       | 7        | 0         | 0         | 2         | 1         | 0         | 0         | Bacteria; Actinobacteria; Actinobacteria; Actinomycetales; Micromonosporaceae; Actinoplanes                       |
| Otu1841 | 8       | 5       | 6       | 8        | 0       | 8        | 16        | 14        | 10        | 3         | 9         | 4         | Bacteria; Acidobacteria; Acidobacteriia; Acidobacteriales; Acidobacteriaceae; Edaphobacter; Edaphobacter_modestum |
| Otu109  | 46      | 0       | 3       | 140      | 0       | 7        | 2         | 28        | 24        | 0         | 1         | 0         | Bacteria; Bacteroidetes; Flavobacteriia; Flavobacteriales; Flavobacteriaceae; Flavobacterium                      |
| Otu108  | 189     | 185     | 148     | 179      | 147     | 398      | 121       | 175       | 128       | 240       | 119       | 66        | Bacteria; Acidobacteria; Chloracidobacteria; RB41; Ellin6075                                                      |
| Otu1844 | 0       | 7       | 2       | 2        | 6       | 0        | 1         | 1         | 0         | 0         | 7         | 1         | Bacteria; Bacteroidetes; Sphingobacteriia; Sphingobacteriales                                                     |
| Otu1845 | 0       | 1       | 3       | 0        | 0       | 3        | 4         | 2         | 1         | 1         | 13        | 1         | Bacteria; Proteobacteria; Betaproteobacteria; Methylophilales; Methylophilaceae                                   |
| Otu295  | 18      | 85      | 38      | 47       | 36      | 46       | 32        | 46        | 38        | 71        | 39        | 14        | Bacteria; Proteobacteria; Deltaproteobacteria; Myxococcales                                                       |

| #OTU ID | Z31DRh1 | Z31DRh2 | Z31DRh3 | Z31DRh4r | Z31DRh5 | Z31DRh6r | Z31J1DRh1 | Z31J1DRh2 | Z31J1DRh3 | Z31J1DRh4 | Z31J1DRh5 | Z31J1DRh6 | taxonomy                                                                                              |
|---------|---------|---------|---------|----------|---------|----------|-----------|-----------|-----------|-----------|-----------|-----------|-------------------------------------------------------------------------------------------------------|
| Otu294  | 38      | 39      | 14      | 34       | 35      | 51       | 38        | 55        | 56        | 51        | 70        | 20        | Bacteria; Acidobacteria; Acidobacteriia; Acidobacteriales; Koribacteraceae                            |
| Otu297  | 18      | 8       | 54      | 71       | 41      | 23       | 24        | 10        | 13        | 22        | 8         | 186       | Bacteria; Verrucomicrobia; Verrucomicrobiae; Verrucomicrobiales; Verrucomicrobiaceae; Prosthecobacter |
| Otu296  | 16      | 7       | 46      | 34       | 6       | 32       | 69        | 53        | 46        | 67        | 22        | 29        | Bacteria; Gemmatimonadetes; Gemmatimonadetes; Gemmatimonadales                                        |
| Otu291  | 16      | 61      | 29      | 45       | 38      | 69       | 34        | 58        | 30        | 41        | 65        | 14        | Bacteria; Acidobacteria; Acidobacteria-6; iii1-15                                                     |
| Otu290  | 40      | 38      | 32      | 28       | 30      | 71       | 60        | 65        | 37        | 110       | 38        | 25        | Bacteria; Acidobacteria; Sva0725; Sva0725                                                             |
| Otu293  | 43      | 49      | 30      | 52       | 46      | 75       | 54        | 50        | 34        | 32        | 59        | 61        | Bacteria; Proteobacteria; Alphaproteobacteria; Rhodospirillales; Rhodospirillaceae                    |
| Otu292  | 50      | 58      | 59      | 60       | 26      | 71       | 96        | 91        | 61        | 101       | 71        | 22        | Bacteria; Gemmatimonadetes; Gemmatimonadetes; Ellin5290                                               |
| Otu2384 | 3       | 2       | 4       | 2        | 4       | 2        | 2         | 3         | 2         | 0         | 4         | 2         | Bacteria; Chlamydiae; Chlamydia; Chlamydiales                                                         |
| Otu2385 | 0       | 0       | 0       | 2        | 2       | 6        | 0         | 1         | 1         | 3         | 0         | 2         | Bacteria; Bacteroidetes; Saprospirae; Saprospirales; Chitinophagaceae                                 |
| Otu2386 | 0       | 0       | 0       | 0        | 0       | 0        | 0         | 3         | 0         | 0         | 0         | 0         | Bacteria; Planctomycetes; Planctomycetia; Gemmatales; Gemmataceae                                     |
| Otu2292 | 0       | 1       | 2       | 0        | 0       | 1        | 2         | 2         | 2         | 0         | 2         | 4         | Bacteria; Proteobacteria; Deltaproteobacteria; Sva0853; JTB36                                         |
| Otu299  | 19      | 62      | 45      | 32       | 63      | 51       | 60        | 56        | 28        | 90        | 49        | 30        | Bacteria; Gemmatimonadetes; Gemmatimonadetes; Ellin5290                                               |
| Otu298  | 3       | 3       | 2       | 59       | 32      | 69       | 3         | 1         | 56        | 4         | 17        | 9         | Bacteria; Proteobacteria; Betaproteobacteria; Rhodocyclales; Rhodocyclaceae; Zoogloea                 |
| Otu2382 | 10      | 1       | 6       | 18       | 3       | 3        | 7         | 3         | 12        | 12        | 3         | 17        | Bacteria; Proteobacteria; Deltaproteobacteria; Myxococcales; Polyangiaceae                            |
| Otu2383 | 0       | 0       | 0       | 0        | 0       | 1        | 0         | 0         | 1         | 3         | 0         | 0         | Bacteria; Cyanobacteria; Chloroplast; Chlorophyta                                                     |
| Otu3017 | 3       | 8       | 3       | 3        | 4       | 7        | 6         | 5         | 5         | 9         | 14        | 0         | Bacteria; Elusimicrobia; Elusimicrobia; IIb                                                           |
| Otu3016 | 0       | 0       | 0       | 2        | 0       | 0        | 0         | 0         | 0         | 0         | 0         | 0         | Bacteria; Verrucomicrobia; Spartobacteria; Chthoniobacteriales; Chthoniobacteraceae; OR-59            |
| Otu3015 | 38      | 25      | 20      | 70       | 20      | 78       | 18        | 56        | 42        | 46        | 57        | 29        | Bacteria; Verrucomicrobia; Pedosphaerae; Pedosphaerales; Ellin517                                     |
| Otu3014 | 3       | 1       | 5       | 4        | 2       | 3        | 3         | 2         | 2         | 3         | 1         | 2         | Bacteria; Actinobacteria; Actinobacteria; Actinomycetales; Pseudonocardia; Pseudonocardia             |
| Otu3013 | 2       | 3       | 4       | 2        | 2       | 3        | 2         | 2         | 4         | 0         | 19        | 0         | Bacteria; Proteobacteria; Betaproteobacteria; Rhodocyclales; Rhodocyclaceae; Dechloromonas            |
| Otu2548 | 12      | 17      | 8       | 8        | 3       | 9        | 10        | 6         | 14        | 2         | 4         | 8         | Bacteria; Bacteroidetes; Cytophagia; Cytophagales; Cytophagaceae                                      |
| Otu2549 | 0       | 4       | 0       | 2        | 4       | 1        | 0         | 1         | 0         | 1         | 3         | 2         | Bacteria; Proteobacteria; Deltaproteobacteria; NB1-j; NB1-i                                           |

| #OTU ID | Z31DRh1 | Z31DRh2 | Z31DRh3 | Z31DRh4r | Z31DRh5 | Z31DRh6r | Z31J1DRh1 | Z31J1DRh2 | Z31J1DRh3 | Z31J1DRh4 | Z31J1DRh5 | Z31J1DRh6 | taxonomy                                                                               |
|---------|---------|---------|---------|----------|---------|----------|-----------|-----------|-----------|-----------|-----------|-----------|----------------------------------------------------------------------------------------|
| Otu2546 | 0       | 0       | 0       | 3        | 0       | 0        | 0         | 0         | 0         | 0         | 0         | 0         | Bacteria; Armatimonadetes; Fimbriimonadia; Fimbriimonadales; Fimbriimonadaceae         |
| Otu2547 | 2       | 5       | 1       | 3        | 8       | 3        | 3         | 0         | 0         | 0         | 5         | 0         | Bacteria; Proteobacteria; Gammaproteobacteria; Legionellales; Coxiellaceae; Aquicella  |
| Otu2544 | 0       | 0       | 0       | 0        | 0       | 1        | 0         | 0         | 0         | 0         | 0         | 3         | Bacteria; Bacteroidetes                                                                |
| Otu2545 | 0       | 0       | 0       | 0        | 5       | 7        | 0         | 1         | 0         | 6         | 1         | 0         | Bacteria; Planctomycetes; Planctomycetia; Gemmatales; Isosphaeraceae                   |
| Otu2542 | 3       | 5       | 1       | 1        | 2       | 10       | 3         | 8         | 3         | 1         | 5         | 2         | Bacteria; Bacteroidetes; Saprospirae; Saprospirales; Chitinophagaceae                  |
| Otu2543 | 0       | 0       | 0       | 3        | 0       | 1        | 1         | 1         | 4         | 1         | 5         | 0         | Bacteria; Elusimicrobia; Elusimicrobia; FAC88                                          |
| Otu2540 | 0       | 0       | 0       | 0        | 0       | 0        | 0         | 0         | 0         | 2         | 0         | 6         | Bacteria; Firmicutes; Bacilli; Bacillales; Paenibacillaceae; Paenibacillus             |
| Otu2541 | 6       | 4       | 0       | 2        | 1       | 2        | 1         | 0         | 1         | 0         | 3         | 1         | Bacteria; Proteobacteria; Deltaproteobacteria; Myxococcales                            |
| Otu325  | 13      | 39      | 14      | 18       | 26      | 16       | 46        | 41        | 30        | 54        | 52        | 13        | Bacteria; Actinobacteria; Thermoleophilia; Gaiellales; Gaiellaceae                     |
| Otu3363 | 0       | 0       | 1       | 2        | 0       | 5        | 0         | 3         | 1         | 1         | 2         | 1         | Bacteria; Actinobacteria; Thermoleophilia; Solirubrobacterales                         |
| Otu324  | 0       | 1       | 3       | 2        | 19      | 52       | 17        | 30        | 29        | 0         | 8         | 2         | Bacteria; Proteobacteria; Alphaproteobacteria; Rhodospirillales; Rhodospirillaceae     |
| Otu4237 | 0       | 2       | 0       | 0        | 0       | 0        | 0         | 0         | 0         | 0         | 0         | 0         | Bacteria                                                                               |
| Otu3872 | 0       | 1       | 3       | 0        | 0       | 0        | 0         | 0         | 1         | 0         | 0         | 0         | Bacteria; Firmicutes; Bacilli; Bacillales                                              |
| Otu1926 | 1       | 5       | 0       | 4        | 4       | 2        | 0         | 0         | 0         | 3         | 6         | 0         | Bacteria; Planctomycetes; Phycisphaerae; WD2101                                        |
| Otu327  | 12      | 51      | 0       | 2        | 0       | 0        | 1         | 0         | 1         | 0         | 0         | 0         | Bacteria; Bacteroidetes; Cytophagia; Cytophagales; Cytophagaceae                       |
| Otu1936 | 1       | 0       | 0       | 1        | 2       | 13       | 1         | 0         | 1         | 1         | 0         | 0         | Bacteria; Chloroflexi; Ktedonobacteria; Ktedonobacterales; Ktedonobacteraceae          |
| Otu1937 | 0       | 3       | 0       | 4        | 1       | 0        | 0         | 0         | 0         | 0         | 0         | 0         | Bacteria; Chloroflexi; Anaerolineae; envOPS12                                          |
| Otu1934 | 2       | 3       | 2       | 4        | 1       | 6        | 1         | 2         | 0         | 2         | 2         | 1         | Bacteria; Armatimonadetes; OPB50                                                       |
| Otu326  | 29      | 54      | 33      | 49       | 23      | 37       | 54        | 22        | 9         | 31        | 58        | 11        | Bacteria; Gemmatimonadetes; Gemmatimonadetes                                           |
| Otu1932 | 0       | 1       | 1       | 2        | 4       | 5        | 4         | 2         | 0         | 1         | 6         | 1         | Bacteria; Armatimonadetes; Chthonomonadetes; SJA-22                                    |
| Otu1933 | 1       | 3       | 4       | 4        | 0       | 1        | 1         | 4         | 6         | 4         | 0         | 0         | Bacteria; Bacteroidetes; Saprospirae; Saprospirales; Chitinophagaceae; Flavisolibacter |
| Otu1930 | 0       | 1       | 0       | 0        | 0       | 1        | 0         | 1         | 0         | 0         | 6         | 0         | Bacteria; Firmicutes; Clostridia; Clostridiales; Clostridiaceae                        |

| #OTU ID | Z31DRh1 | Z31DRh2 | Z31DRh3 | Z31DRh4r | Z31DRh5 | Z31DRh6r | Z31J1DRh1 | Z31J1DRh2 | Z31J1DRh3 | Z31J1DRh4 | Z31J1DRh5 | Z31J1DRh6 | taxonomy                                                                                                         |
|---------|---------|---------|---------|----------|---------|----------|-----------|-----------|-----------|-----------|-----------|-----------|------------------------------------------------------------------------------------------------------------------|
| Otu1931 | 27      | 26      | 21      | 51       | 16      | 43       | 23        | 16        | 7         | 18        | 1         | 19        | Bacteria; Bacteroidetes; Sphingobacteria; Sphingobacteriales; Sphingobacteriaceae                                |
| Otu3490 | 2       | 0       | 1       | 0        | 0       | 0        | 0         | 3         | 0         | 3         | 0         | 0         | Bacteria; Proteobacteria; Alphaproteobacteria                                                                    |
| Otu321  | 50      | 54      | 50      | 79       | 30      | 97       | 69        | 100       | 55        | 75        | 52        | 30        | Bacteria; Proteobacteria; Alphaproteobacteria; Rhizobiales; Hyphomicrobiaceae; Rhodoplanes                       |
| Otu4112 | 0       | 0       | 0       | 2        | 0       | 0        | 0         | 0         | 0         | 0         | 0         | 0         | Bacteria; Firmicutes; Clostridia; Clostridiales; Ruminococcaceae; Faecalibacterium; Faecalibacterium_prausnitzii |
| Otu1938 | 0       | 0       | 0       | 0        | 2       | 0        | 1         | 0         | 0         | 0         | 6         | 0         | Bacteria; OD1; ZB2                                                                                               |
| Otu320  | 27      | 48      | 26      | 63       | 47      | 130      | 44        | 100       | 99        | 26        | 71        | 36        | Bacteria; Acidobacteria; Acidobacteria; Acidobacteriales; Koribacteraceae                                        |
| Otu3378 | 0       | 0       | 0       | 1        | 0       | 0        | 0         | 0         | 0         | 0         | 2         | 0         | Bacteria; Chloroflexi; Chloroflexi; AKIW781                                                                      |
| Otu3379 | 1       | 0       | 2       | 0        | 0       | 1        | 0         | 2         | 0         | 0         | 0         | 0         | Bacteria; Proteobacteria; Alphaproteobacteria; Rhizobiales; Hyphomicrobiaceae                                    |
| Otu323  | 40      | 44      | 36      | 69       | 17      | 110      | 82        | 90        | 66        | 58        | 59        | 22        | Bacteria; Planctomycetes; Phycisphaerae; WD2101                                                                  |
| Otu3372 | 0       | 0       | 0       | 0        | 0       | 0        | 0         | 1         | 0         | 0         | 0         | 2         | Bacteria; Chlamydiae; Chlamydia; Chlamydiales                                                                    |
| Otu3373 | 0       | 0       | 0       | 2        | 0       | 0        | 0         | 0         | 0         | 1         | 0         | 0         | Bacteria                                                                                                         |
| Otu3370 | 0       | 0       | 0       | 0        | 0       | 0        | 0         | 2         | 0         | 0         | 0         | 0         | Bacteria; Bacteroidetes; Cytophagia; Cytophagales; Cytophagaceae; Spirosoma                                      |
| Otu322  | 1       | 50      | 4       | 23       | 0       | 2        | 7         | 8         | 16        | 7         | 15        | 1         | Bacteria; Chlamydiae; Chlamydia; Chlamydiales                                                                    |
| Otu3376 | 0       | 3       | 0       | 0        | 3       | 5        | 1         | 4         | 2         | 0         | 1         | 0         | Bacteria; Proteobacteria; Gammaproteobacteria; Legionellales; Coxiellaceae                                       |
| Otu3377 | 0       | 1       | 2       | 0        | 3       | 2        | 0         | 2         | 2         | 1         | 3         | 0         | Bacteria; AD3; ABS-6                                                                                             |
| Otu3374 | 1       | 5       | 0       | 0        | 1       | 2        | 2         | 0         | 0         | 1         | 1         | 0         | Bacteria; Planctomycetes; vadinHA49; DH61                                                                        |
| Otu3375 | 0       | 0       | 1       | 2        | 0       | 1        | 2         | 0         | 0         | 0         | 0         | 0         | Bacteria; TM7; TM7-1                                                                                             |
| Otu3178 | 0       | 0       | 0       | 0        | 0       | 0        | 0         | 2         | 0         | 0         | 0         | 0         | Bacteria; Planctomycetes; Planctomycetia                                                                         |
| Otu3169 | 0       | 1       | 0       | 0        | 0       | 0        | 0         | 0         | 2         | 0         | 0         | 0         | Bacteria; Bacteroidetes; Saprospirae; Saprospirales; Chitinophagaceae                                            |
| Otu859  | 13      | 15      | 11      | 50       | 14      | 55       | 14        | 26        | 14        | 11        | 9         | 7         | Bacteria; Armatimonadetes; Chthonomonadetes; Chthonomonadales; Chthonomonadaceae                                 |
| Otu858  | 23      | 71      | 28      | 41       | 91      | 124      | 54        | 61        | 48        | 54        | 92        | 23        | Bacteria; Verrucomicrobia; Pedosphaerae; Pedosphaerales; Ellin515                                                |
| Otu857  | 0       | 3       | 2       | 6        | 17      | 2        | 9         | 6         | 1         | 4         | 8         | 5         | Bacteria; Proteobacteria; Deltaproteobacteria; Myxococcales                                                      |

| #OTU ID | Z31DRh1 | Z31DRh2 | Z31DRh3 | Z31DRh4r | Z31DRh5 | Z31DRh6r | Z31J1DRh1 | Z31J1DRh2 | Z31J1DRh3 | Z31J1DRh4 | Z31J1DRh5 | Z31J1DRh6 | taxonomy                                                                                           |
|---------|---------|---------|---------|----------|---------|----------|-----------|-----------|-----------|-----------|-----------|-----------|----------------------------------------------------------------------------------------------------|
| Otu856  | 0       | 0       | 0       | 0        | 0       | 12       | 0         | 0         | 3         | 0         | 0         | 0         | Bacteria; Bacteroidetes; Sphingobacteriia; Sphingobacteriales                                      |
| Otu855  | 116     | 123     | 108     | 199      | 118     | 116      | 128       | 36        | 59        | 156       | 112       | 75        | Bacteria; Proteobacteria; Betaproteobacteria; Burkholderiales; Comamonadaceae; Rubrivivax          |
| Otu854  | 16      | 4       | 7       | 5        | 0       | 10       | 8         | 10        | 5         | 12        | 6         | 3         | Bacteria; Planctomycetes; Phycisphaerae; WD2101                                                    |
| Otu853  | 5       | 26      | 27      | 34       | 17      | 22       | 12        | 13        | 23        | 26        | 41        | 12        | Bacteria; Planctomycetes; Phycisphaerae; WD2101                                                    |
| Otu852  | 7       | 9       | 8       | 11       | 5       | 26       | 8         | 6         | 7         | 0         | 7         | 13        | Bacteria; Actinobacteria; Actinobacteria; Actinomycetales; Microbacteriaceae; Cryocola             |
| Otu851  | 0       | 2       | 1       | 3        | 0       | 14       | 0         | 11        | 6         | 0         | 1         | 4         | Bacteria; Proteobacteria; Deltaproteobacteria; MIZ46                                               |
| Otu850  | 3       | 5       | 3       | 4        | 14      | 10       | 5         | 1         | 1         | 11        | 15        | 2         | Bacteria; Gemmatimonadetes; Gemmatimonadetes; Ellin5290                                            |
| Otu3167 | 0       | 0       | 0       | 0        | 0       | 0        | 1         | 2         | 0         | 0         | 0         | 0         | Bacteria                                                                                           |
| Otu4235 | 2       | 0       | 1       | 1        | 0       | 1        | 0         | 0         | 0         | 2         | 0         | 0         | Bacteria; Bacteroidetes; Saprospirae; Saprospirales; Chitinophagaceae                              |
| Otu4426 | 3       | 0       | 2       | 0        | 0       | 4        | 0         | 1         | 0         | 1         | 1         | 0         | Bacteria; Proteobacteria; Alphaproteobacteria; Rhizobiales                                         |
| Otu3166 | 49      | 35      | 49      | 58       | 36      | 60       | 67        | 80        | 64        | 59        | 41        | 22        | Bacteria; Acidobacteria; Solibacteres; Solibacterales; Solibacteraceae; Candidatus_Solibacter      |
| Otu4137 | 1       | 2       | 0       | 2        | 0       | 1        | 2         | 0         | 0         | 0         | 2         | 2         | Bacteria; Actinobacteria; Acidimicrobia; Acidimicrobiales; C111                                    |
| Otu4110 | 1       | 10      | 3       | 1        | 3       | 2        | 3         | 0         | 0         | 0         | 3         | 0         | Bacteria; Acidobacteria; Chloracidobacteria; RB41; Ellin6075                                       |
| Otu2859 | 2       | 1       | 0       | 0        | 0       | 0        | 1         | 0         | 0         | 0         | 0         | 0         | Bacteria                                                                                           |
| Otu3788 | 2       | 3       | 0       | 0        | 0       | 0        | 0         | 0         | 0         | 0         | 0         | 0         | Bacteria; Planctomycetes; Planctomycetia; Pirellulales; Pirellulaceae                              |
| Otu4018 | 0       | 1       | 0       | 0        | 0       | 0        | 0         | 0         | 0         | 0         | 3         | 0         | Bacteria; Proteobacteria; Gammaproteobacteria                                                      |
| Otu1622 | 0       | 0       | 0       | 2        | 0       | 4        | 0         | 0         | 0         | 1         | 0         | 0         | Bacteria; Chloroflexi; Anaerolineae; Anaerolineales; Anaerolinaceae; Anaerolinea                   |
| Otu1623 | 0       | 0       | 0       | 0        | 0       | 1        | 0         | 0         | 0         | 0         | 4         | 0         | Bacteria                                                                                           |
| Otu1620 | 6       | 5       | 3       | 3        | 3       | 7        | 2         | 4         | 4         | 3         | 14        | 3         | Bacteria; Chloroflexi                                                                              |
| Otu1621 | 8       | 25      | 5       | 14       | 8       | 32       | 7         | 5         | 5         | 27        | 22        | 6         | Bacteria; Acidobacteria; Acidobacteria-6; iii1-15                                                  |
| Otu1626 | 3       | 7       | 4       | 5        | 5       | 8        | 5         | 8         | 3         | 2         | 3         | 1         | Bacteria; Firmicutes; Bacilli; Bacillales; Alicyclobacillaceae; Alicyclobacillus                   |
| Otu1627 | 4       | 2       | 2       | 2        | 1       | 7        | 0         | 1         | 6         | 5         | 1         | 0         | Bacteria; Proteobacteria; Deltaproteobacteria; Bdellovibrionales; Bdellovibrionaceae; Bdellovibrio |



| #OTU ID | Z31DRh1 | Z31DRh2 | Z31DRh3 | Z31DRh4r | Z31DRh5 | Z31DRh6r | Z31J1DRh1 | Z31J1DRh2 | Z31J1DRh3 | Z31J1DRh4 | Z31J1DRh5 | Z31J1DRh6 | taxonomy                                                                                                  |
|---------|---------|---------|---------|----------|---------|----------|-----------|-----------|-----------|-----------|-----------|-----------|-----------------------------------------------------------------------------------------------------------|
| Otu1624 | 3       | 3       | 1       | 2        | 2       | 3        | 2         | 1         | 5         | 0         | 4         | 1         | Bacteria; Proteobacteria; Gammaproteobacteria; Legionellales                                              |
| Otu1625 | 2       | 0       | 2       | 6        | 0       | 4        | 3         | 12        | 4         | 1         | 1         | 0         | Bacteria; Actinobacteria; Actinobacteria; Actinomycetales                                                 |
| Otu2155 | 1       | 0       | 0       | 0        | 0       | 0        | 0         | 3         | 1         | 0         | 1         | 0         | Bacteria; Proteobacteria; Gammaproteobacteria; Legionellales; Coxiellaceae                                |
| Otu2154 | 0       | 4       | 1       | 0        | 0       | 3        | 1         | 0         | 0         | 0         | 0         | 0         | Bacteria; Proteobacteria; Alphaproteobacteria; Rhodospirillales; Rhodospirillaceae                        |
| Otu1629 | 3       | 2       | 2       | 4        | 3       | 8        | 2         | 1         | 3         | 9         | 0         | 1         | Bacteria; Proteobacteria; Deltaproteobacteria; Myxococcales                                               |
| Otu2151 | 0       | 5       | 0       | 0        | 5       | 5        | 2         | 5         | 3         | 3         | 15        | 0         | Bacteria; Elusimicrobia; Elusimicrobia; MVP-88                                                            |
| Otu2150 | 0       | 1       | 1       | 3        | 3       | 5        | 1         | 3         | 1         | 0         | 1         | 1         | Bacteria; Actinobacteria; Actinobacteria; Actinomycetales                                                 |
| Otu2153 | 0       | 0       | 0       | 0        | 0       | 0        | 0         | 4         | 3         | 0         | 0         | 2         | Bacteria; Proteobacteria; Deltaproteobacteria; MIZ46                                                      |
| Otu2152 | 4       | 0       | 1       | 8        | 1       | 3        | 0         | 3         | 4         | 0         | 2         | 0         | Bacteria; Elusimicrobia; Elusimicrobia; FAC88                                                             |
| Otu2498 | 0       | 0       | 3       | 0        | 0       | 0        | 0         | 0         | 0         | 0         | 0         | 0         | Bacteria; Chlamydiae; Chlamydia; Chlamydiales                                                             |
| Otu4233 | 0       | 0       | 1       | 3        | 0       | 1        | 0         | 2         | 0         | 0         | 1         | 1         | Bacteria; Planctomycetes; Planctomycetia; Gemmatales; Isosphaeraeae; Singulisphaera; Singulisphaera_rosea |
| Otu4012 | 0       | 0       | 0       | 0        | 0       | 0        | 0         | 2         | 0         | 1         | 0         | 0         | Bacteria; TM7                                                                                             |
| Otu2455 | 0       | 0       | 0       | 0        | 0       | 0        | 3         | 0         | 0         | 0         | 0         | 0         | Bacteria; Proteobacteria; Deltaproteobacteria; Myxococcales                                               |
| Otu2499 | 0       | 0       | 0       | 0        | 0       | 4        | 0         | 0         | 0         | 0         | 1         | 0         | Bacteria; Chloroflexi; Thermomicrobia; JG30-KF-CM45                                                       |
| Otu4272 | 0       | 2       | 0       | 0        | 0       | 0        | 0         | 0         | 1         | 0         | 0         | 0         | Bacteria; OD1; SM2F11                                                                                     |
| Otu3958 | 0       | 0       | 0       | 0        | 0       | 0        | 0         | 0         | 0         | 0         | 2         | 0         | Bacteria; NKB19                                                                                           |
| Otu3629 | 2       | 0       | 0       | 0        | 0       | 0        | 0         | 0         | 0         | 0         | 0         | 0         | Bacteria; Proteobacteria                                                                                  |
| Otu3956 | 0       | 0       | 2       | 7        | 3       | 3        | 0         | 0         | 0         | 0         | 0         | 0         | Bacteria; Proteobacteria; Alphaproteobacteria; Sphingomonadales; Sphingomonadaceae; Novosphingobium       |
| Otu3957 | 0       | 0       | 0       | 0        | 0       | 0        | 0         | 0         | 0         | 0         | 0         | 2         | Bacteria; Bacteroidetes; Sphingobacteriia; Sphingobacteriales; Sphingobacteriaceae; Sphingobacterium      |
| Otu3954 | 8       | 15      | 8       | 46       | 4       | 18       | 13        | 7         | 7         | 2         | 11        | 3         | Bacteria; Verrucomicrobia; Pedosphaerae; Pedosphaerales; Ellin517                                         |
| Otu3955 | 3       | 2       | 1       | 3        | 0       | 1        | 1         | 0         | 0         | 1         | 2         | 2         | Bacteria; Acidobacteria; Solibacteres; Solibacterales; Solibacteraceae; Candidatus_Solibacter             |
| Otu3952 | 0       | 0       | 1       | 1        | 2       | 1        | 0         | 0         | 3         | 0         | 0         | 1         | Bacteria; Bacteroidetes; Cytophagia; Cytophagales; Cytophagaceae; Hymenobacter                            |

| #OTU ID | Z31DRh1 | Z31DRh2 | Z31DRh3 | Z31DRh4r | Z31DRh5 | Z31DRh6r | Z31J1DRh1 | Z31J1DRh2 | Z31J1DRh3 | Z31J1DRh4 | Z31J1DRh5 | Z31J1DRh6 | taxonomy                                                                                           |
|---------|---------|---------|---------|----------|---------|----------|-----------|-----------|-----------|-----------|-----------|-----------|----------------------------------------------------------------------------------------------------|
| Otu3953 | 0       | 0       | 0       | 0        | 0       | 3        | 0         | 0         | 0         | 0         | 0         | 0         | Bacteria                                                                                           |
| Otu3950 | 0       | 0       | 0       | 0        | 0       | 2        | 0         | 0         | 0         | 0         | 0         | 0         | Bacteria; Actinobacteria; Actinobacteria; Actinomycetales                                          |
| Otu3951 | 0       | 3       | 0       | 0        | 0       | 1        | 0         | 0         | 1         | 0         | 0         | 1         | Bacteria; Actinobacteria; Acidimicrobia; Acidimicrobiales                                          |
| Otu3371 | 0       | 3       | 1       | 0        | 0       | 1        | 0         | 0         | 0         | 0         | 2         | 0         | Bacteria                                                                                           |
| Otu2029 | 0       | 0       | 3       | 0        | 0       | 0        | 0         | 0         | 0         | 0         | 0         | 0         | Bacteria                                                                                           |
| Otu2028 | 0       | 2       | 0       | 1        | 0       | 0        | 3         | 0         | 0         | 0         | 1         | 0         | Bacteria; WS3; PRR-12; Sediment-1                                                                  |
| Otu3840 | 0       | 0       | 0       | 3        | 0       | 0        | 0         | 0         | 0         | 0         | 0         | 0         | Bacteria; Bacteroidetes                                                                            |
| Otu1718 | 0       | 0       | 0       | 0        | 0       | 1        | 0         | 2         | 0         | 0         | 4         | 0         | Bacteria; Proteobacteria; Deltaproteobacteria; MIZ46                                               |
| Otu1719 | 0       | 5       | 2       | 7        | 6       | 15       | 5         | 2         | 6         | 5         | 1         | 2         | Bacteria; Chloroflexi; Anaerolineae; SBR1031; oc28                                                 |
| Otu1716 | 2       | 3       | 2       | 1        | 1       | 0        | 1         | 1         | 4         | 2         | 1         | 4         | Bacteria; Proteobacteria; Gammaproteobacteria; Legionellales; Coxiellaceae                         |
| Otu1717 | 10      | 19      | 11      | 35       | 23      | 32       | 7         | 10        | 5         | 14        | 27        | 9         | Bacteria; Verrucomicrobia; Pedosphaerae; Pedosphaerales                                            |
| Otu1714 | 3       | 1       | 1       | 9        | 1       | 9        | 2         | 6         | 3         | 4         | 6         | 1         | Bacteria; Elusimicrobia; Elusimicrobia; FAC88                                                      |
| Otu1715 | 0       | 1       | 6       | 4        | 5       | 2        | 14        | 4         | 4         | 2         | 6         | 0         | Bacteria; Bacteroidetes; Saprospirae; Saprospirales; Chitinophagaceae                              |
| Otu1712 | 0       | 0       | 0       | 0        | 3       | 9        | 0         | 0         | 0         | 0         | 0         | 0         | Bacteria; Bacteroidetes; Saprospirae; Saprospirales; Chitinophagaceae                              |
| Otu1713 | 0       | 5       | 0       | 4        | 1       | 2        | 1         | 0         | 0         | 0         | 4         | 0         | Bacteria; Chloroflexi; Anaerolineae; GCA004                                                        |
| Otu1710 | 0       | 0       | 0       | 0        | 4       | 7        | 0         | 3         | 5         | 0         | 2         | 1         | Bacteria; Actinobacteria; Actinobacteria; Actinomycetales                                          |
| Otu1711 | 4       | 6       | 8       | 4        | 7       | 6        | 9         | 4         | 9         | 7         | 9         | 2         | Bacteria; Bacteroidetes; Saprospirae; Saprospirales; Chitinophagaceae; Segetibacter                |
| Otu3394 | 0       | 0       | 3       | 0        | 3       | 0        | 0         | 0         | 0         | 0         | 0         | 0         | Bacteria; Proteobacteria; Deltaproteobacteria; Myxococcales                                        |
| Otu3395 | 0       | 0       | 0       | 0        | 0       | 2        | 0         | 0         | 2         | 0         | 0         | 1         | Bacteria; Proteobacteria; TA18; PHOS-HD29                                                          |
| Otu3396 | 0       | 0       | 0       | 0        | 0       | 0        | 0         | 2         | 0         | 0         | 0         | 0         | Bacteria                                                                                           |
| Otu3397 | 0       | 2       | 0       | 0        | 0       | 5        | 0         | 0         | 0         | 0         | 0         | 4         | Bacteria; Proteobacteria; Deltaproteobacteria; Bdellovibrionales; Bdellovibrionaceae; Bdellovibrio |
| Otu3390 | 0       | 0       | 0       | 0        | 0       | 0        | 2         | 0         | 0         | 0         | 0         | 0         | Bacteria                                                                                           |

| #OTU ID | Z31DRh1 | Z31DRh2 | Z31DRh3 | Z31DRh4r | Z31DRh5 | Z31DRh6r | Z31J1DRh1 | Z31J1DRh2 | Z31J1DRh3 | Z31J1DRh4 | Z31J1DRh5 | Z31J1DRh6 | taxonomy                                                                                        |
|---------|---------|---------|---------|----------|---------|----------|-----------|-----------|-----------|-----------|-----------|-----------|-------------------------------------------------------------------------------------------------|
| Otu3391 | 19      | 38      | 31      | 60       | 35      | 42       | 48        | 50        | 56        | 31        | 84        | 20        | Bacteria; Proteobacteria; Betaproteobacteria; MND1                                              |
| Otu3392 | 2       | 0       | 2       | 2        | 1       | 0        | 0         | 4         | 0         | 1         | 0         | 0         | Bacteria; Proteobacteria                                                                        |
| Otu3393 | 0       | 0       | 0       | 2        | 2       | 2        | 1         | 0         | 1         | 4         | 1         | 1         | Bacteria; Acidobacteria; Solibacteres; Solibacterales                                           |
| Otu3740 | 0       | 0       | 3       | 0        | 0       | 0        | 0         | 0         | 0         | 0         | 0         | 0         | Bacteria; Proteobacteria; Alphaproteobacteria                                                   |
| Otu3398 | 1       | 0       | 0       | 0        | 2       | 0        | 0         | 3         | 0         | 2         | 0         | 0         | Bacteria; Cyanobacteria; 4C0d-2; SM1D11                                                         |
| Otu3399 | 0       | 0       | 0       | 0        | 0       | 0        | 0         | 3         | 0         | 0         | 2         | 0         | Bacteria; Proteobacteria                                                                        |
| Otu3841 | 0       | 0       | 0       | 0        | 0       | 0        | 0         | 2         | 0         | 0         | 0         | 0         | Bacteria; Actinobacteria; Acidimicrobiia; Acidimicrobiales                                      |
| Otu3625 | 0       | 0       | 0       | 1        | 0       | 2        | 0         | 0         | 2         | 0         | 0         | 0         | Bacteria; Chloroflexi; Anaerolineae; SBR1031; oc28                                              |
| Otu1433 | 3       | 2       | 3       | 6        | 8       | 9        | 14        | 18        | 12        | 0         | 14        | 0         | Bacteria; Proteobacteria; Alphaproteobacteria                                                   |
| Otu1432 | 0       | 9       | 0       | 0        | 0       | 0        | 0         | 0         | 0         | 0         | 0         | 0         | Bacteria; Proteobacteria; Gammaproteobacteria; Oceanospirillales                                |
| Otu1431 | 2       | 4       | 0       | 5        | 1       | 4        | 0         | 1         | 0         | 0         | 2         | 1         | Bacteria; Chloroflexi; Anaerolineae; GCA004                                                     |
| Otu1430 | 0       | 4       | 0       | 0        | 1       | 6        | 0         | 0         | 0         | 0         | 2         | 0         | Bacteria; Chloroflexi; Anaerolineae; A31; S47                                                   |
| Otu1437 | 0       | 8       | 1       | 7        | 1       | 3        | 2         | 2         | 2         | 9         | 4         | 0         | Bacteria; Bacteroidetes; Sphingobacteriia; Sphingobacteriales                                   |
| Otu1435 | 0       | 0       | 0       | 0        | 0       | 9        | 0         | 2         | 0         | 5         | 0         | 1         | Bacteria; Planctomycetes; Planctomycetia; Gemmatales; Gemmataceae                               |
| Otu1434 | 0       | 0       | 0       | 0        | 0       | 1        | 0         | 0         | 1         | 6         | 0         | 0         | Bacteria; Chloroflexi; Ktedonobacteria; Ktedonobacteriales; Ktedonobacteraceae                  |
| Otu1439 | 0       | 0       | 0       | 0        | 0       | 6        | 0         | 0         | 0         | 0         | 0         | 0         | Bacteria; Cyanobacteria; Chloroplast; Chlorophyta                                               |
| Otu1438 | 0       | 3       | 1       | 5        | 0       | 2        | 12        | 3         | 2         | 7         | 1         | 3         | Bacteria; Proteobacteria; Gammaproteobacteria; Xanthomonadales; Xanthomonadaceae; Rhodanobacter |
| Otu1121 | 2       | 6       | 2       | 3        | 2       | 9        | 3         | 10        | 1         | 1         | 4         | 1         | Bacteria                                                                                        |
| Otu1120 | 8       | 7       | 7       | 14       | 9       | 39       | 13        | 16        | 6         | 22        | 17        | 12        | Bacteria; Planctomycetes; Planctomycetia; Gemmatales; Gemmataceae; Gemmata                      |
| Otu2849 | 0       | 0       | 0       | 0        | 0       | 0        | 2         | 0         | 0         | 0         | 0         | 0         | Bacteria; Firmicutes; Clostridia; Clostridiales                                                 |
| Otu2848 | 0       | 0       | 0       | 0        | 0       | 0        | 0         | 0         | 0         | 2         | 0         | 0         | Bacteria; Verrucomicrobia                                                                       |
| Otu3407 | 0       | 2       | 0       | 0        | 1       | 0        | 0         | 0         | 0         | 0         | 0         | 0         | Bacteria; TM7; TM7-1                                                                            |

| #OTU ID | Z31DRh1 | Z31DRh2 | Z31DRh3 | Z31DRh4r | Z31DRh5 | Z31DRh6r | Z31J1DRh1 | Z31J1DRh2 | Z31J1DRh3 | Z31J1DRh4 | Z31J1DRh5 | Z31J1DRh6 | taxonomy                                                                                                       |
|---------|---------|---------|---------|----------|---------|----------|-----------|-----------|-----------|-----------|-----------|-----------|----------------------------------------------------------------------------------------------------------------|
| Otu2843 | 0       | 2       | 0       | 0        | 0       | 0        | 0         | 0         | 1         | 0         | 0         | 1         | Bacteria; Verrucomicrobia; Methylocidiphilae; S-BQ2-57                                                         |
| Otu2842 | 0       | 0       | 0       | 0        | 0       | 0        | 0         | 0         | 2         | 0         | 0         | 0         | Bacteria; Actinobacteria; Acidimicrobia; Acidimicrobiales; EB1017                                              |
| Otu2841 | 0       | 3       | 1       | 0        | 0       | 1        | 0         | 0         | 1         | 0         | 0         | 0         | Bacteria; Firmicutes; Clostridia; Clostridiales; Peptococcaceae; Desulfosporosinus; Desulfosporosinus_meridiei |
| Otu2840 | 0       | 0       | 0       | 1        | 3       | 0        | 0         | 0         | 0         | 0         | 0         | 0         | Bacteria                                                                                                       |
| Otu2847 | 2       | 7       | 2       | 2        | 0       | 2        | 3         | 2         | 3         | 4         | 1         | 2         | Bacteria; Actinobacteria; Actinobacteria; Actinomycetales; Nocardioidaceae                                     |
| Otu2846 | 2       | 4       | 3       | 3        | 1       | 1        | 4         | 3         | 4         | 2         | 4         | 1         | Bacteria; Proteobacteria; Gammaproteobacteria; Xanthomonadales; Sinobacteraceae                                |
| Otu2845 | 0       | 0       | 0       | 0        | 0       | 3        | 0         | 0         | 0         | 0         | 0         | 0         | Bacteria; Verrucomicrobia; Pedosphaerae; Pedosphaerales; Ellin515                                              |
| Otu2844 | 3       | 5       | 0       | 2        | 2       | 5        | 2         | 1         | 0         | 0         | 2         | 2         | Bacteria; TM7; TM7-1                                                                                           |
| Otu4306 | 0       | 0       | 0       | 0        | 0       | 0        | 0         | 0         | 0         | 0         | 2         | 0         | Bacteria; Bacteroidetes; Sphingobacteria; Sphingobacteriales                                                   |
| Otu400  | 24      | 41      | 23      | 29       | 25      | 29       | 23        | 17        | 20        | 30        | 43        | 16        | Bacteria; Proteobacteria; Alphaproteobacteria; Rhodospirillales; Rhodospirillaceae                             |
| Otu1389 | 8       | 0       | 0       | 1        | 7       | 1        | 0         | 1         | 0         | 0         | 0         | 0         | Bacteria; Tenericutes; Mollicutes; Entomoplasmatales                                                           |
| Otu1388 | 1       | 5       | 2       | 17       | 2       | 4        | 5         | 3         | 1         | 1         | 4         | 1         | Bacteria; Proteobacteria; Alphaproteobacteria; Sphingomonadales; Sphingomonadaceae; Sphingomonas               |
| Otu401  | 23      | 5       | 12      | 20       | 14      | 61       | 11        | 21        | 28        | 36        | 14        | 28        | Bacteria; Chloroflexi; Ktedonobacteria; JG30-KF-AS9                                                            |
| Otu1385 | 4       | 0       | 0       | 3        | 1       | 4        | 0         | 1         | 1         | 2         | 1         | 14        | Bacteria                                                                                                       |
| Otu1384 | 3       | 0       | 1       | 1        | 3       | 6        | 0         | 0         | 1         | 0         | 0         | 0         | Bacteria; Armatimonadetes; Chthonomonadetes; Chthonomonadales                                                  |
| Otu1387 | 10      | 30      | 16      | 18       | 5       | 7        | 12        | 8         | 5         | 8         | 24        | 9         | Bacteria; Planctomycetes; Phycisphaerae; WD2101                                                                |
| Otu1386 | 0       | 0       | 0       | 1        | 1       | 2        | 0         | 7         | 1         | 12        | 2         | 0         | Bacteria; Proteobacteria; Gammaproteobacteria; Legionellales                                                   |
| Otu1381 | 7       | 2       | 3       | 5        | 4       | 16       | 0         | 3         | 7         | 0         | 1         | 10        | Bacteria; Actinobacteria; Actinobacteria; Actinomycetales; Micromonosporaceae; Pilimelia                       |
| Otu1380 | 13      | 13      | 18      | 20       | 18      | 35       | 25        | 22        | 19        | 17        | 21        | 19        | Bacteria; Proteobacteria; Deltaproteobacteria; Myxococcales                                                    |
| Otu1383 | 0       | 0       | 0       | 0        | 0       | 2        | 1         | 1         | 0         | 6         | 1         | 1         | Bacteria; Planctomycetes; Planctomycetia; Gemmatales; Gemmataceae                                              |
| Otu1382 | 0       | 6       | 3       | 11       | 2       | 8        | 19        | 6         | 6         | 8         | 3         | 4         | Bacteria; Proteobacteria; Alphaproteobacteria                                                                  |
| Otu2160 | 1       | 1       | 3       | 3        | 0       | 3        | 1         | 0         | 1         | 0         | 0         | 0         | Bacteria; Planctomycetes; Phycisphaerae; WD2101                                                                |

| #OTU ID | Z31DRh1 | Z31DRh2 | Z31DRh3 | Z31DRh4r | Z31DRh5 | Z31DRh6r | Z31J1DRh1 | Z31J1DRh2 | Z31J1DRh3 | Z31J1DRh4 | Z31J1DRh5 | Z31J1DRh6 | taxonomy                                                                                                                       |
|---------|---------|---------|---------|----------|---------|----------|-----------|-----------|-----------|-----------|-----------|-----------|--------------------------------------------------------------------------------------------------------------------------------|
| Otu1549 | 1       | 0       | 1       | 5        | 0       | 5        | 3         | 2         | 2         | 0         | 3         | 0         | Bacteria; Proteobacteria; Betaproteobacteria; Burkholderiales; Burkholderiaceae                                                |
| Otu1548 | 8       | 9       | 10      | 7        | 3       | 3        | 2         | 2         | 3         | 3         | 10        | 1         | Bacteria                                                                                                                       |
| Otu1547 | 0       | 0       | 1       | 6        | 2       | 2        | 0         | 3         | 0         | 0         | 2         | 0         | Bacteria; Proteobacteria; Alphaproteobacteria; Rhizobiales; Xanthobacteraceae                                                  |
| Otu1546 | 6       | 3       | 0       | 1        | 7       | 1        | 1         | 0         | 0         | 0         | 0         | 0         | Bacteria; Chlorobi                                                                                                             |
| Otu1545 | 0       | 0       | 1       | 0        | 3       | 3        | 0         | 7         | 0         | 4         | 1         | 0         | Bacteria; Chlamydiae; Chlamydia; Chlamydiales                                                                                  |
| Otu1544 | 0       | 0       | 0       | 0        | 0       | 6        | 0         | 0         | 0         | 0         | 0         | 0         | Bacteria; OD1; ZB2                                                                                                             |
| Otu1543 | 2       | 8       | 2       | 0        | 0       | 1        | 1         | 0         | 0         | 0         | 1         | 0         | Bacteria; Proteobacteria; Alphaproteobacteria; Rhodospirillales; Rhodospirillaceae                                             |
| Otu1542 | 0       | 6       | 1       | 1        | 0       | 0        | 0         | 0         | 1         | 1         | 4         | 0         | Bacteria; Chloroflexi; Chloroflexi; Roseiflexales; Kouleothrixaceae                                                            |
| Otu1541 | 0       | 0       | 0       | 0        | 0       | 1        | 1         | 8         | 0         | 1         | 3         | 0         | Bacteria; Actinobacteria; Actinobacteria; Actinomycetales; Promicromonosporaceae; Cellulosimicrobium                           |
| Otu1540 | 2       | 2       | 0       | 7        | 0       | 2        | 0         | 0         | 0         | 1         | 4         | 0         | Bacteria; Acidobacteria; Solibacteres; Solibacterales; Solibacteraceae; Candidatus_Solibacter                                  |
| Otu1554 | 3       | 10      | 5       | 19       | 2       | 3        | 12        | 1         | 1         | 1         | 7         | 0         | Bacteria; Gemmatimonadetes; Gemmatimonadetes; N1423WL                                                                          |
| Otu2163 | 0       | 0       | 0       | 0        | 0       | 2        | 0         | 1         | 1         | 3         | 1         | 1         | Bacteria; Proteobacteria; Deltaproteobacteria; FAC87                                                                           |
| Otu4325 | 3       | 0       | 1       | 2        | 2       | 1        | 2         | 3         | 2         | 0         | 0         | 3         | Bacteria; Verrucomicrobia; Spartobacteria; Chthoniobacterales; Chthoniobacteraceae; Chthoniobacter                             |
| Otu1555 | 0       | 1       | 3       | 3        | 0       | 1        | 0         | 1         | 2         | 5         | 0         | 0         | Bacteria; Proteobacteria; Gammaproteobacteria; Legionellales; Coxiellaceae; Aquicella                                          |
| Otu2164 | 1       | 0       | 0       | 0        | 3       | 1        | 0         | 0         | 1         | 0         | 0         | 0         | Bacteria; Proteobacteria; Deltaproteobacteria; Bdellovibrionales; Bdellovibrionaceae; Bdellovibrio; Bdellovibrio_bacteriovorus |
| Otu2738 | 0       | 0       | 0       | 0        | 0       | 0        | 0         | 0         | 0         | 0         | 4         | 0         | Bacteria; Proteobacteria; Deltaproteobacteria; Desulfobacterales; Desulfobulbaceae; Desulfobulbus                              |
| Otu1556 | 1       | 0       | 0       | 10       | 3       | 4        | 1         | 0         | 5         | 4         | 4         | 3         | Bacteria; Gemmatimonadetes; Gemmatimonadetes                                                                                   |
| Otu2165 | 3       | 1       | 0       | 0        | 0       | 0        | 0         | 0         | 0         | 1         | 0         | 1         | Bacteria; Bacteroidetes                                                                                                        |
| Otu3570 | 2       | 0       | 2       | 0        | 0       | 2        | 2         | 0         | 0         | 0         | 0         | 0         | Bacteria; Proteobacteria; Alphaproteobacteria; Rhizobiales; Rhizobiaceae                                                       |
| Otu149  | 19      | 110     | 30      | 94       | 109     | 81       | 38        | 32        | 18        | 21        | 64        | 22        | Bacteria; Chloroflexi; Anaerolineae; A31                                                                                       |
| Otu3572 | 0       | 0       | 0       | 0        | 0       | 0        | 1         | 0         | 0         | 3         | 0         | 0         | Bacteria; Elusimicrobia; Elusimicrobia; MVP-88                                                                                 |
| Otu1557 | 2       | 0       | 2       | 3        | 0       | 6        | 1         | 3         | 0         | 6         | 0         | 5         | Bacteria                                                                                                                       |

| #OTU ID | Z31DRh1 | Z31DRh2 | Z31DRh3 | Z31DRh4r | Z31DRh5 | Z31DRh6r | Z31J1DRh1 | Z31J1DRh2 | Z31J1DRh3 | Z31J1DRh4 | Z31J1DRh5 | Z31J1DRh6 | taxonomy                                                                                                         |
|---------|---------|---------|---------|----------|---------|----------|-----------|-----------|-----------|-----------|-----------|-----------|------------------------------------------------------------------------------------------------------------------|
| Otu3574 | 1       | 2       | 1       | 1        | 2       | 0        | 2         | 0         | 0         | 0         | 4         | 0         | Bacteria; Bacteroidetes; Sphingobacteria; Sphingobacteriales                                                     |
| Otu2166 | 0       | 3       | 0       | 0        | 0       | 0        | 0         | 1         | 0         | 0         | 0         | 0         | Bacteria; Armatimonadetes; SHA-37                                                                                |
| Otu3576 | 0       | 0       | 1       | 0        | 0       | 1        | 0         | 0         | 2         | 0         | 0         | 0         | Bacteria; Firmicutes; Clostridia; Clostridiales; Peptococcaceae; Desulfosporosinus; Desulfosporosinus_meridiei   |
| Otu148  | 47      | 50      | 25      | 133      | 23      | 78       | 36        | 12        | 10        | 43        | 27        | 23        | Bacteria; Proteobacteria; Alphaproteobacteria; Rhodospirillales; Rhodospirillaceae                               |
| Otu3578 | 1       | 0       | 1       | 0        | 1       | 2        | 1         | 0         | 0         | 2         | 1         | 1         | Bacteria; Planctomycetes; Planctomycetia; Gemmatales; Gemmataceae                                                |
| Otu1550 | 2       | 2       | 0       | 2        | 5       | 7        | 2         | 2         | 8         | 4         | 5         | 1         | Bacteria; Planctomycetes; Planctomycetia; Gemmatales; Isosphaeraceae                                             |
| Otu1632 | 0       | 0       | 0       | 0        | 0       | 1        | 0         | 1         | 4         | 0         | 1         | 0         | Bacteria; Proteobacteria; Alphaproteobacteria; Rhodospirillales; Rhodospirillaceae                               |
| Otu1498 | 0       | 1       | 3       | 6        | 1       | 1        | 2         | 3         | 3         | 0         | 0         | 1         | Bacteria; TM6; SJA-4                                                                                             |
| Otu4092 | 0       | 0       | 0       | 0        | 0       | 0        | 0         | 0         | 3         | 0         | 0         | 0         | Bacteria                                                                                                         |
| Otu4093 | 0       | 0       | 2       | 0        | 1       | 0        | 0         | 0         | 0         | 0         | 2         | 0         | Bacteria; Actinobacteria; Acidimicrobiia; Acidimicrobiales                                                       |
| Otu4090 | 3       | 0       | 4       | 4        | 4       | 11       | 0         | 4         | 3         | 3         | 1         | 9         | Bacteria; Actinobacteria; Actinobacteria; Actinomycetales                                                        |
| Otu4091 | 0       | 0       | 0       | 1        | 2       | 1        | 0         | 0         | 0         | 0         | 1         | 0         | Bacteria                                                                                                         |
| Otu4096 | 0       | 0       | 0       | 0        | 0       | 2        | 0         | 0         | 0         | 0         | 0         | 0         | Bacteria; Chloroflexi; Anaerolineae; WCHB1-50                                                                    |
| Otu1552 | 0       | 6       | 1       | 3        | 1       | 1        | 4         | 2         | 1         | 2         | 9         | 0         | Bacteria; Chloroflexi; Anaerolineae; GCA004                                                                      |
| Otu4094 | 1       | 4       | 0       | 2        | 1       | 1        | 1         | 0         | 0         | 1         | 2         | 0         | Bacteria; Planctomycetes; Planctomycetia; Pirellulales; Pirellulaceae                                            |
| Otu4095 | 2       | 0       | 0       | 0        | 0       | 0        | 0         | 0         | 0         | 0         | 0         | 0         | Bacteria; Verrucomicrobia                                                                                        |
| Otu888  | 0       | 2       | 0       | 0        | 0       | 3        | 0         | 15        | 0         | 0         | 0         | 5         | Bacteria; Verrucomicrobia; Spartobacteria; Chthoniobacterales; Chthoniobacteraceae; Candidatus_Xiphinematobacter |
| Otu4098 | 0       | 0       | 0       | 0        | 2       | 1        | 0         | 2         | 1         | 1         | 3         | 0         | Bacteria; Proteobacteria; Alphaproteobacteria                                                                    |
| Otu1553 | 0       | 0       | 0       | 9        | 1       | 0        | 2         | 2         | 1         | 2         | 1         | 1         | Bacteria; Firmicutes; Bacilli; Bacillales; Paenibacillaceae; Paenibacillus                                       |
| Otu889  | 1       | 8       | 2       | 2        | 3       | 11       | 23        | 11        | 14        | 11        | 24        | 2         | Bacteria; Proteobacteria; Gammaproteobacteria; Xanthomonadales; Sinobacteraceae; Steroidobacter                  |
| Otu1099 | 5       | 3       | 3       | 3        | 5       | 12       | 4         | 6         | 15        | 3         | 6         | 3         | Bacteria; Proteobacteria; Alphaproteobacteria; Caulobacteriales; Caulobacteraceae; Phenyllobacterium             |
| Otu1098 | 0       | 10      | 8       | 4        | 0       | 3        | 13        | 7         | 4         | 1         | 8         | 1         | Bacteria; Proteobacteria; Betaproteobacteria                                                                     |

| #OTU ID | Z31DRh1 | Z31DRh2 | Z31DRh3 | Z31DRh4r | Z31DRh5 | Z31DRh6r | Z31J1DRh1 | Z31J1DRh2 | Z31J1DRh3 | Z31J1DRh4 | Z31J1DRh5 | Z31J1DRh6 | taxonomy                                                                                           |
|---------|---------|---------|---------|----------|---------|----------|-----------|-----------|-----------|-----------|-----------|-----------|----------------------------------------------------------------------------------------------------|
| Otu1091 | 5       | 7       | 8       | 20       | 19      | 26       | 10        | 9         | 6         | 15        | 17        | 6         | Bacteria; Verrucomicrobia; Pedosphaerae; Pedosphaerales; Ellin517                                  |
| Otu1090 | 4       | 3       | 1       | 4        | 3       | 3        | 1         | 10        | 14        | 7         | 3         | 5         | Bacteria; Planctomycetes; vadinHA49; DH61                                                          |
| Otu1093 | 1       | 2       | 7       | 2        | 0       | 4        | 3         | 2         | 1         | 11        | 7         | 0         | Bacteria; Planctomycetes; Phycisphaerae; WD2101                                                    |
| Otu1092 | 5       | 0       | 3       | 3        | 0       | 11       | 2         | 2         | 3         | 2         | 4         | 0         | Bacteria; Planctomycetes; Phycisphaerae; WD2101                                                    |
| Otu1095 | 2       | 8       | 6       | 9        | 5       | 9        | 3         | 10        | 9         | 7         | 9         | 1         | Bacteria; Armatimonadetes; Fimbriimonadia; Fimbriimonadales; Fimbriimonadaceae; Fimbriimonas       |
| Otu1094 | 1       | 4       | 3       | 0        | 9       | 3        | 0         | 0         | 0         | 0         | 21        | 0         | Bacteria; Proteobacteria; Deltaproteobacteria; Desulfuromonadales; Geobacteraceae; Geobacter       |
| Otu1097 | 0       | 19      | 8       | 2        | 24      | 9        | 10        | 3         | 5         | 0         | 18        | 1         | Bacteria; Planctomycetes; C6; MVS-107                                                              |
| Otu1096 | 0       | 8       | 2       | 4        | 5       | 8        | 2         | 0         | 0         | 3         | 9         | 0         | Bacteria; Chloroflexi; Anaerolineae; SBR1031; oc28                                                 |
| Otu4416 | 41      | 13      | 5       | 11       | 8       | 7        | 12        | 8         | 5         | 19        | 11        | 3         | Bacteria; Proteobacteria; Deltaproteobacteria; Myxococcales                                        |
| Otu668  | 25      | 76      | 28      | 28       | 22      | 22       | 14        | 7         | 6         | 10        | 33        | 8         | Bacteria; Chloroflexi; Ellin6529                                                                   |
| Otu4414 | 0       | 0       | 0       | 0        | 0       | 2        | 0         | 0         | 0         | 2         | 0         | 0         | Bacteria; Proteobacteria; Gammaproteobacteria                                                      |
| Otu4415 | 3       | 0       | 0       | 0        | 0       | 0        | 0         | 0         | 0         | 0         | 0         | 0         | Bacteria; Chloroflexi; Anaerolineae; SBR1031; A4b                                                  |
| Otu4412 | 0       | 2       | 0       | 0        | 0       | 0        | 0         | 0         | 0         | 0         | 0         | 0         | Bacteria; Acidobacteria; Solibacteres; Solibacterales                                              |
| Otu4413 | 0       | 2       | 1       | 0        | 0       | 0        | 0         | 0         | 0         | 0         | 1         | 0         | Bacteria; Proteobacteria; Deltaproteobacteria; Myxococcales                                        |
| Otu4410 | 0       | 2       | 1       | 1        | 5       | 2        | 1         | 1         | 0         | 1         | 0         | 2         | Bacteria; Proteobacteria; Deltaproteobacteria; Myxococcales                                        |
| Otu669  | 12      | 28      | 6       | 14       | 10      | 14       | 17        | 14        | 4         | 10        | 11        | 3         | Bacteria; Actinobacteria; Thermoleophilia; Solirubrobacterales; Solirubrobacteraceae               |
| Otu3674 | 0       | 0       | 0       | 0        | 2       | 0        | 0         | 0         | 0         | 0         | 1         | 0         | Bacteria; Armatimonadetes; SJA-176; RB046                                                          |
| Otu4238 | 2       | 0       | 0       | 0        | 0       | 0        | 1         | 5         | 0         | 1         | 1         | 0         | Bacteria; Proteobacteria; Alphaproteobacteria; Rickettsiales; Rickettsiaceae                       |
| Otu4419 | 0       | 0       | 0       | 0        | 0       | 0        | 0         | 0         | 0         | 0         | 2         | 0         | Bacteria                                                                                           |
| Otu2713 | 2       | 0       | 0       | 0        | 2       | 1        | 0         | 0         | 0         | 0         | 1         | 0         | Bacteria; Proteobacteria; Deltaproteobacteria; Bdellovibrionales; Bdellovibrionaceae; Bdellovibrio |
| Otu2712 | 0       | 0       | 0       | 0        | 1       | 3        | 0         | 0         | 0         | 0         | 0         | 0         | Bacteria                                                                                           |
| Otu598  | 23      | 26      | 22      | 29       | 16      | 25       | 19        | 31        | 17        | 13        | 21        | 25        | Bacteria; Planctomycetes; Phycisphaerae; WD2101                                                    |

| #OTU ID | Z31DRh1 | Z31DRh2 | Z31DRh3 | Z31DRh4r | Z31DRh5 | Z31DRh6r | Z31J1DRh1 | Z31J1DRh2 | Z31J1DRh3 | Z31J1DRh4 | Z31J1DRh5 | Z31J1DRh6 | taxonomy                                                                              |
|---------|---------|---------|---------|----------|---------|----------|-----------|-----------|-----------|-----------|-----------|-----------|---------------------------------------------------------------------------------------|
| Otu599  | 0       | 0       | 1       | 0        | 1       | 10       | 0         | 0         | 0         | 4         | 1         | 26        | Bacteria; Proteobacteria; Betaproteobacteria; Neisseriales; Neisseriaceae             |
| Otu2717 | 6       | 4       | 0       | 9        | 4       | 1        | 3         | 1         | 1         | 2         | 1         | 6         | Bacteria; Firmicutes; Bacilli; Bacillales; Paenibacillaceae; Cohnella                 |
| Otu2716 | 0       | 0       | 0       | 0        | 0       | 0        | 0         | 2         | 0         | 0         | 0         | 0         | Bacteria; Proteobacteria; Gammaproteobacteria                                         |
| Otu2715 | 7       | 0       | 0       | 10       | 1       | 3        | 3         | 2         | 0         | 0         | 1         | 7         | Bacteria; Proteobacteria; Alphaproteobacteria; Sphingomonadales; Sphingomonadaceae    |
| Otu2714 | 0       | 2       | 3       | 2        | 0       | 5        | 0         | 2         | 0         | 1         | 0         | 0         | Bacteria; Proteobacteria; Gammaproteobacteria; Legionellales; Coxiellaceae; Aquicella |
| Otu592  | 3       | 2       | 4       | 0        | 7       | 26       | 0         | 1         | 15        | 2         | 0         | 0         | Bacteria; Bacteroidetes; Sphingobacteria; Sphingobacteriales; Sphingobacteriaceae     |
| Otu593  | 1       | 1       | 0       | 31       | 0       | 1        | 1         | 1         | 2         | 1         | 4         | 0         | Bacteria; Gemmatimonadetes; Gemmatimonadetes; KD8-87                                  |
| Otu590  | 17      | 47      | 23      | 54       | 32      | 51       | 31        | 20        | 30        | 26        | 54        | 13        | Bacteria; Actinobacteria; Thermoleophilia; Gaiellales; Gaiellaceae                    |
| Otu591  | 0       | 4       | 6       | 12       | 7       | 31       | 10        | 7         | 5         | 3         | 12        | 1         | Bacteria; Acidobacteria; Solibacteres; Solibacterales                                 |
| Otu596  | 16      | 17      | 10      | 42       | 16      | 51       | 14        | 34        | 17        | 17        | 12        | 8         | Bacteria; Chloroflexi; TK10; AKYG885; Dolo_23                                         |
| Otu597  | 17      | 10      | 22      | 28       | 18      | 6        | 11        | 17        | 11        | 17        | 8         | 6         | Bacteria; Proteobacteria; Deltaproteobacteria; Myxococcales                           |
| Otu594  | 5       | 2       | 2       | 24       | 8       | 0        | 2         | 1         | 7         | 3         | 1         | 0         | Bacteria; Bacteroidetes; Saprospirae; Saprospirales; Chitinophagaceae                 |
| Otu144  | 121     | 62      | 110     | 198      | 44      | 250      | 97        | 87        | 85        | 87        | 46        | 128       | Bacteria; Proteobacteria; Gammaproteobacteria; Xanthomonadales; Xanthomonadaceae      |
| Otu147  | 9       | 26      | 11      | 31       | 42      | 139      | 49        | 124       | 59        | 31        | 53        | 19        | Bacteria; Acidobacteria; Solibacteres; Solibacterales                                 |
| Otu4422 | 0       | 2       | 0       | 0        | 0       | 0        | 0         | 0         | 0         | 0         | 0         | 0         | Bacteria                                                                              |
| Otu146  | 25      | 115     | 15      | 128      | 57      | 19       | 63        | 4         | 6         | 14        | 31        | 7         | Bacteria; Acidobacteria; Chloracidobacteria; 11-24                                    |
| Otu4204 | 0       | 0       | 0       | 0        | 2       | 0        | 0         | 0         | 0         | 0         | 0         | 0         | Bacteria; Bacteroidetes                                                               |
| Otu1165 | 0       | 1       | 5       | 10       | 0       | 0        | 0         | 1         | 2         | 4         | 0         | 0         | Bacteria; Chlamydiae; Chlamydia; Chlamydiales                                         |
| Otu1164 | 26      | 16      | 11      | 17       | 7       | 26       | 22        | 6         | 5         | 13        | 10        | 11        | Bacteria; Proteobacteria; Alphaproteobacteria; Caulobacterales; Caulobacteraceae      |
| Otu1167 | 14      | 12      | 7       | 17       | 3       | 13       | 12        | 13        | 5         | 6         | 6         | 5         | Bacteria; Actinobacteria; Actinobacteria; Actinomycetales                             |
| Otu1166 | 14      | 1       | 1       | 1        | 1       | 6        | 1         | 5         | 1         | 0         | 0         | 11        | Bacteria; Bacteroidetes; Saprospirae; Saprospirales; Chitinophagaceae                 |
| Otu1161 | 9       | 6       | 7       | 24       | 10      | 20       | 13        | 14        | 12        | 4         | 7         | 7         | Bacteria; Proteobacteria; Alphaproteobacteria; Ellin329                               |



| #OTU ID | Z31DRh1 | Z31DRh2 | Z31DRh3 | Z31DRh4r | Z31DRh5 | Z31DRh6r | Z31J1DRh1 | Z31J1DRh2 | Z31J1DRh3 | Z31J1DRh4 | Z31J1DRh5 | Z31J1DRh6 | taxonomy                                                                                           |
|---------|---------|---------|---------|----------|---------|----------|-----------|-----------|-----------|-----------|-----------|-----------|----------------------------------------------------------------------------------------------------|
| Otu1160 | 1       | 3       | 0       | 2        | 0       | 10       | 1         | 4         | 3         | 4         | 0         | 0         | Bacteria; Elusimicrobia; Elusimicrobia; FAC88                                                      |
| Otu1163 | 0       | 0       | 0       | 1        | 2       | 0        | 0         | 0         | 0         | 0         | 10        | 0         | Bacteria; Proteobacteria; Deltaproteobacteria; Desulfuromonadales; Geobacteraceae; Geobacter       |
| Otu1162 | 3       | 4       | 5       | 9        | 1       | 5        | 2         | 2         | 1         | 8         | 8         | 1         | Bacteria; Chloroflexi; C0119                                                                       |
| Otu444  | 43      | 43      | 29      | 38       | 25      | 45       | 25        | 14        | 12        | 24        | 42        | 22        | Bacteria; Proteobacteria; Betaproteobacteria; SC-I-84                                              |
| Otu445  | 6       | 7       | 0       | 1        | 6       | 5        | 12        | 1         | 0         | 1         | 4         | 40        | Bacteria; Bacteroidetes; Sphingobacteriia; Sphingobacteriales                                      |
| Otu446  | 5       | 19      | 2       | 2        | 4       | 6        | 3         | 0         | 2         | 1         | 45        | 3         | Bacteria; Proteobacteria; Deltaproteobacteria; Myxococcales; Myxococcaceae; Anaeromyxobacter       |
| Otu447  | 9       | 27      | 13      | 32       | 34      | 27       | 30        | 17        | 10        | 20        | 45        | 5         | Bacteria; Verrucomicrobia; Pedosphaerae; Pedosphaerales                                            |
| Otu1169 | 14      | 15      | 11      | 17       | 8       | 12       | 9         | 7         | 36        | 17        | 11        | 18        | Bacteria; Proteobacteria; Alphaproteobacteria; Sphingomonadales; Sphingomonadaceae                 |
| Otu1168 | 0       | 9       | 0       | 1        | 0       | 5        | 3         | 5         | 0         | 9         | 11        | 3         | Bacteria; Proteobacteria; Alphaproteobacteria; Rickettsiales                                       |
| Otu442  | 13      | 37      | 20      | 30       | 9       | 14       | 36        | 29        | 33        | 1         | 10        | 4         | Bacteria; Bacteroidetes; Saprospirae; Saprospirales; Chitinophagaceae                              |
| Otu443  | 15      | 90      | 36      | 35       | 42      | 29       | 19        | 3         | 6         | 28        | 58        | 4         | Bacteria; Verrucomicrobia; Pedosphaerae; Pedosphaerales                                            |
| Otu1367 | 0       | 0       | 0       | 7        | 0       | 2        | 0         | 0         | 1         | 0         | 1         | 1         | Bacteria; Proteobacteria; Alphaproteobacteria; Rickettsiales                                       |
| Otu1366 | 3       | 3       | 0       | 2        | 8       | 12       | 0         | 1         | 9         | 0         | 1         | 1         | Bacteria; Proteobacteria; Alphaproteobacteria; Rhizobiales; Aurantimonadaceae                      |
| Otu1365 | 0       | 0       | 0       | 0        | 0       | 0        | 0         | 0         | 6         | 0         | 0         | 0         | Bacteria; Chlamydiae; Chlamydia; Chlamydiales                                                      |
| Otu1364 | 1       | 0       | 0       | 10       | 1       | 3        | 0         | 1         | 0         | 8         | 2         | 5         | Bacteria; Proteobacteria; Deltaproteobacteria; Bdellovibrionales; Bdellovibrionaceae; Bdellovibrio |
| Otu1363 | 5       | 1       | 3       | 2        | 1       | 10       | 0         | 2         | 1         | 1         | 0         | 0         | Bacteria; Proteobacteria; Alphaproteobacteria; Rhizobiales; Hyphomicrobiaceae; Devosia             |
| Otu1362 | 11      | 3       | 2       | 3        | 4       | 3        | 0         | 4         | 5         | 0         | 1         | 4         | Bacteria; Proteobacteria; Gammaproteobacteria; Xanthomonadales; Sinobacteraceae                    |
| Otu1361 | 1       | 6       | 1       | 8        | 5       | 8        | 3         | 5         | 1         | 3         | 9         | 0         | Bacteria; Elusimicrobia; Elusimicrobia; Ilb                                                        |
| Otu1360 | 1       | 0       | 0       | 7        | 0       | 1        | 0         | 2         | 1         | 0         | 0         | 0         | Bacteria; WPS-2                                                                                    |
| Otu1369 | 0       | 0       | 1       | 2        | 0       | 6        | 0         | 2         | 1         | 3         | 1         | 2         | Bacteria; Proteobacteria; TA18; PHOS-HD29                                                          |
| Otu1368 | 3       | 1       | 0       | 2        | 4       | 8        | 2         | 3         | 2         | 3         | 2         | 0         | Bacteria; Armatimonadetes; Armatimonadia; Armatimonadales; Armatimonadaceae                        |
| Otu2458 | 0       | 1       | 0       | 0        | 1       | 0        | 0         | 0         | 0         | 0         | 1         | 3         | Bacteria                                                                                           |

| #OTU ID | Z31DRh1 | Z31DRh2 | Z31DRh3 | Z31DRh4r | Z31DRh5 | Z31DRh6r | Z31J1DRh1 | Z31J1DRh2 | Z31J1DRh3 | Z31J1DRh4 | Z31J1DRh5 | Z31J1DRh6 | taxonomy                                                                                          |
|---------|---------|---------|---------|----------|---------|----------|-----------|-----------|-----------|-----------|-----------|-----------|---------------------------------------------------------------------------------------------------|
| Otu4307 | 0       | 0       | 0       | 0        | 0       | 0        | 0         | 1         | 0         | 0         | 2         | 0         | Bacteria; Firmicutes; Bacilli; Bacillales; Paenibacillaceae; Paenibacillus                        |
| Otu4304 | 0       | 0       | 0       | 1        | 2       | 2        | 0         | 0         | 0         | 0         | 0         | 0         | Bacteria; Planctomycetes; Phycisphaerae; WD2101                                                   |
| Otu4305 | 2       | 0       | 1       | 0        | 0       | 0        | 0         | 0         | 0         | 2         | 1         | 1         | Bacteria; Elusimicrobia; Elusimicrobia; Elusimicrobiales                                          |
| Otu2629 | 0       | 0       | 0       | 0        | 0       | 0        | 0         | 0         | 0         | 0         | 2         | 0         | Bacteria                                                                                          |
| Otu2628 | 0       | 1       | 2       | 3        | 3       | 10       | 2         | 3         | 2         | 4         | 5         | 2         | Bacteria; Proteobacteria; Alphaproteobacteria                                                     |
| Otu2627 | 0       | 0       | 0       | 0        | 0       | 0        | 2         | 0         | 0         | 0         | 0         | 0         | Bacteria; Bacteroidetes                                                                           |
| Otu2626 | 0       | 0       | 0       | 0        | 0       | 0        | 0         | 0         | 0         | 0         | 2         | 0         | Bacteria; Proteobacteria; Deltaproteobacteria                                                     |
| Otu2625 | 5       | 1       | 4       | 3        | 2       | 1        | 4         | 1         | 0         | 1         | 1         | 1         | Bacteria; Proteobacteria; Alphaproteobacteria; Caulobacterales; Caulobacteraceae; Phenylbacterium |
| Otu2624 | 0       | 1       | 0       | 0        | 2       | 0        | 0         | 0         | 0         | 0         | 2         | 0         | Bacteria; Proteobacteria; Deltaproteobacteria; Myxococcales                                       |
| Otu2623 | 0       | 0       | 0       | 2        | 0       | 0        | 0         | 0         | 0         | 0         | 0         | 0         | Bacteria; Proteobacteria; Deltaproteobacteria; Myxococcales                                       |
| Otu2622 | 0       | 0       | 0       | 0        | 1       | 2        | 4         | 1         | 1         | 3         | 0         | 0         | Bacteria; TM7; SC3                                                                                |
| Otu2621 | 1       | 0       | 1       | 0        | 0       | 4        | 0         | 0         | 0         | 0         | 0         | 0         | Bacteria; Bacteroidetes                                                                           |
| Otu2459 | 2       | 4       | 1       | 0        | 2       | 0        | 2         | 0         | 0         | 3         | 0         | 1         | Bacteria; Proteobacteria; Gammaproteobacteria                                                     |
| Otu3718 | 0       | 0       | 0       | 0        | 0       | 2        | 0         | 0         | 0         | 1         | 0         | 2         | Bacteria; Chloroflexi; Ktedonobacteria; JG30-KF-AS9                                               |
| Otu3719 | 0       | 0       | 1       | 1        | 0       | 1        | 1         | 0         | 0         | 0         | 3         | 0         | Bacteria; Chloroflexi; Anaerolineae; GCA004                                                       |
| Otu4301 | 0       | 0       | 0       | 0        | 0       | 0        | 0         | 0         | 0         | 0         | 2         | 0         | Bacteria; Verrucomicrobia; Spartobacteria; Chthoniobacteriales; Chthoniobacteraceae               |
| Otu4300 | 2       | 0       | 0       | 0        | 0       | 0        | 0         | 0         | 0         | 0         | 0         | 0         | Bacteria; Proteobacteria; Gammaproteobacteria                                                     |
| Otu3710 | 42      | 24      | 30      | 51       | 13      | 16       | 34        | 17        | 9         | 84        | 32        | 25        | Bacteria; Proteobacteria; Alphaproteobacteria; Sphingomonadales; Sphingomonadaceae                |
| Otu3711 | 0       | 0       | 1       | 2        | 1       | 0        | 2         | 0         | 0         | 3         | 2         | 0         | Bacteria; Elusimicrobia; Elusimicrobia; FAC88                                                     |
| Otu3712 | 0       | 0       | 0       | 2        | 0       | 0        | 0         | 0         | 0         | 0         | 0         | 0         | Bacteria; Actinobacteria; Actinobacteria; Actinomycetales                                         |
| Otu3713 | 0       | 1       | 2       | 0        | 0       | 0        | 0         | 0         | 0         | 0         | 0         | 0         | Bacteria; Proteobacteria; Gammaproteobacteria                                                     |
| Otu3714 | 1       | 0       | 3       | 0        | 0       | 1        | 0         | 0         | 1         | 2         | 3         | 0         | Bacteria; Planctomycetes; Phycisphaerae; WD2101                                                   |

| #OTU ID | Z31DRh1 | Z31DRh2 | Z31DRh3 | Z31DRh4r | Z31DRh5 | Z31DRh6r | Z31J1DRh1 | Z31J1DRh2 | Z31J1DRh3 | Z31J1DRh4 | Z31J1DRh5 | Z31J1DRh6 | taxonomy                                                                                     |
|---------|---------|---------|---------|----------|---------|----------|-----------|-----------|-----------|-----------|-----------|-----------|----------------------------------------------------------------------------------------------|
| Otu3715 | 0       | 0       | 0       | 0        | 0       | 2        | 0         | 0         | 2         | 0         | 1         | 0         | Bacteria; Cyanobacteria; Chloroplast; Streptophyta                                           |
| Otu3716 | 0       | 2       | 0       | 0        | 0       | 0        | 0         | 0         | 0         | 0         | 0         | 0         | Bacteria; ODI; SM2F11                                                                        |
| Otu3717 | 3       | 1       | 0       | 6        | 0       | 5        | 1         | 2         | 1         | 1         | 3         | 2         | Bacteria; Planctomycetes; Planctomycetia; Gemmatales; Gemmataceae; Gemmata                   |
| Otu4265 | 1       | 8       | 0       | 4        | 4       | 3        | 1         | 1         | 0         | 1         | 11        | 1         | Bacteria; Proteobacteria; Deltaproteobacteria; Myxococcales; Myxococcaceae; Anaeromyxobacter |
| Otu4264 | 0       | 2       | 0       | 0        | 0       | 0        | 0         | 0         | 0         | 0         | 0         | 0         | Bacteria; Acidobacteria; Acidobacteria-6                                                     |
| Otu3857 | 2       | 1       | 0       | 9        | 1       | 18       | 0         | 1         | 2         | 3         | 0         | 0         | Bacteria; Bacteroidetes; Saprospirae; Saprospirales; Chitinophagaceae                        |
| Otu4267 | 0       | 2       | 2       | 2        | 3       | 1        | 0         | 5         | 0         | 5         | 7         | 0         | Bacteria; Verrucomicrobia; Pedosphaerae; Pedosphaerales; Ellin515                            |
| Otu130  | 70      | 24      | 17      | 47       | 33      | 152      | 24        | 9         | 4         | 2         | 16        | 2         | Bacteria; Acidobacteria; Chloracidobacteria; RB41; Ellin6075                                 |
| Otu131  | 41      | 51      | 41      | 192      | 49      | 103      | 58        | 57        | 70        | 28        | 19        | 146       | Bacteria; Bacteroidetes; Saprospirae; Saprospirales; Chitinophagaceae                        |
| Otu132  | 1       | 3       | 5       | 1        | 2       | 118      | 1         | 5         | 11        | 1         | 0         | 8         | Bacteria; Bacteroidetes; Sphingobacteria; Sphingobacteriales                                 |
| Otu133  | 10      | 52      | 38      | 17       | 22      | 232      | 14        | 82        | 12        | 13        | 26        | 0         | Bacteria; Chloroflexi; Ktedonobacteria                                                       |
| Otu134  | 44      | 143     | 52      | 109      | 49      | 52       | 100       | 120       | 86        | 121       | 160       | 31        | Bacteria; Actinobacteria; Thermoleophilina; Gaiellales; Gaiellaceae                          |
| Otu135  | 78      | 68      | 74      | 147      | 68      | 184      | 75        | 77        | 61        | 69        | 67        | 20        | Bacteria; Armatimonadetes; Chthonomonadetes; Chthonomonadales; Chthonomonadaceae             |
| Otu136  | 33      | 84      | 56      | 52       | 66      | 184      | 53        | 44        | 29        | 118       | 67        | 39        | Bacteria; Planctomycetes; Phycisphaerae; WD2101                                              |
| Otu137  | 96      | 76      | 104     | 237      | 48      | 168      | 191       | 129       | 97        | 39        | 67        | 43        | Bacteria; Bacteroidetes; Sphingobacteria; Sphingobacteriales; Sphingobacteriaceae            |
| Otu138  | 125     | 1       | 2       | 11       | 5       | 5        | 1         | 11        | 2         | 1         | 0         | 8         | Bacteria; Bacteroidetes                                                                      |
| Otu139  | 62      | 48      | 64      | 165      | 29      | 140      | 59        | 65        | 93        | 56        | 66        | 33        | Bacteria; Acidobacteria; Solibacteres; Solibacterales                                        |
| Otu4260 | 0       | 0       | 0       | 1        | 0       | 0        | 2         | 0         | 0         | 0         | 0         | 0         | Bacteria; Elusimicrobia; Elusimicrobia; I1b                                                  |
| Otu4263 | 0       | 0       | 0       | 0        | 0       | 0        | 0         | 2         | 0         | 0         | 0         | 0         | Bacteria; Planctomycetes; Phycisphaerae; Phycisphaerales                                     |
| Otu918  | 12      | 14      | 7       | 6        | 10      | 7        | 9         | 15        | 8         | 8         | 4         | 5         | Bacteria; Acidobacteria; Chloracidobacteria                                                  |
| Otu919  | 18      | 36      | 18      | 42       | 11      | 48       | 37        | 28        | 29        | 12        | 27        | 23        | Bacteria; Actinobacteria; Actinobacteria; Actinomycetales; Nocardioidaceae                   |
| Otu916  | 0       | 0       | 1       | 6        | 1       | 12       | 2         | 9         | 2         | 4         | 1         | 3         | Bacteria; Gemmatimonadetes; Gemmatimonadetes                                                 |

| #OTU ID | Z31DRh1 | Z31DRh2 | Z31DRh3 | Z31DRh4r | Z31DRh5 | Z31DRh6r | Z31J1DRh1 | Z31J1DRh2 | Z31J1DRh3 | Z31J1DRh4 | Z31J1DRh5 | Z31J1DRh6 | taxonomy                                                                                                                  |
|---------|---------|---------|---------|----------|---------|----------|-----------|-----------|-----------|-----------|-----------|-----------|---------------------------------------------------------------------------------------------------------------------------|
| Otu917  | 0       | 0       | 0       | 0        | 0       | 1        | 21        | 0         | 0         | 0         | 0         | 2         | Bacteria; Firmicutes; Bacilli; Lactobacillales; Streptococaceae; Streptococcus                                            |
| Otu914  | 0       | 0       | 0       | 12       | 0       | 0        | 0         | 0         | 0         | 0         | 0         | 0         | Bacteria; Proteobacteria; Deltaproteobacteria; Spirobacillales                                                            |
| Otu915  | 0       | 4       | 0       | 1        | 1       | 1        | 1         | 0         | 0         | 2         | 14        | 0         | Bacteria; Proteobacteria; Deltaproteobacteria; Myxococcales                                                               |
| Otu912  | 3       | 5       | 1       | 7        | 1       | 10       | 5         | 2         | 4         | 8         | 3         | 1         | Bacteria; Proteobacteria; Deltaproteobacteria; Myxococcales                                                               |
| Otu913  | 6       | 21      | 5       | 8        | 10      | 2        | 10        | 2         | 1         | 16        | 8         | 1         | Bacteria; Acidobacteria; Acidobacteria-5                                                                                  |
| Otu910  | 10      | 0       | 0       | 0        | 2       | 5        | 0         | 3         | 2         | 0         | 3         | 4         | Bacteria; Proteobacteria; Gammaproteobacteria; Xanthomonadales; Xanthomonadaceae                                          |
| Otu911  | 3       | 2       | 3       | 9        | 2       | 7        | 16        | 11        | 8         | 5         | 6         | 6         | Bacteria; Gemmatimonadetes; Gemmatimonadetes; N1423WL                                                                     |
| Otu3004 | 2       | 0       | 0       | 0        | 0       | 0        | 0         | 0         | 0         | 0         | 0         | 0         | Bacteria; Proteobacteria; Gammaproteobacteria; Xanthomonadales; Xanthomonadaceae                                          |
| Otu3005 | 28      | 74      | 29      | 56       | 39      | 64       | 73        | 61        | 30        | 49        | 31        | 24        | Bacteria; Firmicutes; Bacilli; Bacillales; Bacillaceae; Bacillus; Bacillus_flexus                                         |
| Otu2539 | 88      | 23      | 12      | 50       | 8       | 210      | 14        | 73        | 48        | 28        | 49        | 8         | Bacteria; Bacteroidetes; Saprospirae; Saprospirales; Chitinophagaceae                                                     |
| Otu2538 | 0       | 6       | 0       | 0        | 0       | 0        | 0         | 0         | 0         | 0         | 0         | 0         | Bacteria; Proteobacteria; Alphaproteobacteria; Rhodospirillales; Rhodospirillaceae; Phaeospirillum; Phaeospirillum_fulvum |
| Otu3000 | 2       | 0       | 0       | 0        | 0       | 0        | 0         | 0         | 0         | 0         | 0         | 0         | Bacteria; Verrucomicrobia                                                                                                 |
| Otu3001 | 1       | 3       | 0       | 4        | 2       | 1        | 2         | 3         | 3         | 1         | 1         | 1         | Bacteria; Proteobacteria; Alphaproteobacteria; Rhodospirillales; Rhodospirillaceae                                        |
| Otu3002 | 0       | 0       | 2       | 13       | 5       | 0        | 0         | 1         | 0         | 0         | 0         | 8         | Bacteria; Bacteroidetes; Saprospirae; Saprospirales; Chitinophagaceae                                                     |
| Otu3003 | 12      | 6       | 7       | 20       | 10      | 15       | 15        | 20        | 20        | 37        | 17        | 13        | Bacteria; Bacteroidetes; Saprospirae; Saprospirales; Chitinophagaceae; Flavisolibacter                                    |
| Otu2533 | 0       | 0       | 0       | 0        | 0       | 0        | 0         | 0         | 0         | 0         | 4         | 0         | Bacteria; Planctomycetes; vadinHA49; DH61                                                                                 |
| Otu2532 | 0       | 2       | 2       | 1        | 3       | 6        | 2         | 4         | 0         | 0         | 4         | 0         | Bacteria; Actinobacteria; Acidimicrobia; Acidimicrobiales                                                                 |
| Otu2531 | 4       | 0       | 3       | 0        | 1       | 2        | 1         | 0         | 0         | 0         | 5         | 0         | Bacteria; Proteobacteria; Deltaproteobacteria; Myxococcales                                                               |
| Otu2530 | 0       | 0       | 0       | 2        | 1       | 2        | 1         | 0         | 0         | 1         | 8         | 0         | Bacteria; Elusimicrobia; Elusimicrobia; I1b                                                                               |
| Otu2537 | 2       | 6       | 1       | 1        | 4       | 1        | 0         | 2         | 2         | 1         | 3         | 0         | Bacteria; Actinobacteria; Thermoleophilia; Solirubrobacterales                                                            |
| Otu2536 | 0       | 0       | 0       | 0        | 0       | 6        | 1         | 0         | 0         | 0         | 2         | 0         | Bacteria; Planctomycetes; Planctomycetia; Gemmatales; Gemmataceae                                                         |
| Otu2535 | 0       | 0       | 1       | 0        | 4       | 1        | 0         | 0         | 0         | 0         | 1         | 0         | Bacteria; Acidobacteria; TM1                                                                                              |

| #OTU ID | Z31DRh1 | Z31DRh2 | Z31DRh3 | Z31DRh4r | Z31DRh5 | Z31DRh6r | Z31J1DRh1 | Z31J1DRh2 | Z31J1DRh3 | Z31J1DRh4 | Z31J1DRh5 | Z31J1DRh6 | taxonomy                                                                                                |
|---------|---------|---------|---------|----------|---------|----------|-----------|-----------|-----------|-----------|-----------|-----------|---------------------------------------------------------------------------------------------------------|
| Otu2534 | 10      | 9       | 15      | 27       | 14      | 55       | 18        | 42        | 53        | 20        | 46        | 18        | Bacteria; Acidobacteria; Solibacteres; Solibacterales; Solibacteraceae; Candidatus_Solibacter           |
| Otu624  | 2       | 0       | 2       | 23       | 0       | 6        | 1         | 0         | 0         | 2         | 2         | 1         | Bacteria; Proteobacteria                                                                                |
| Otu625  | 19      | 1       | 9       | 21       | 5       | 5        | 4         | 3         | 4         | 4         | 2         | 5         | Bacteria; Proteobacteria; Gammaproteobacteria                                                           |
| Otu626  | 17      | 25      | 14      | 29       | 12      | 46       | 10        | 24        | 20        | 14        | 17        | 14        | Bacteria; Proteobacteria; Deltaproteobacteria                                                           |
| Otu627  | 4       | 7       | 5       | 11       | 9       | 18       | 10        | 10        | 0         | 21        | 8         | 6         | Bacteria; Firmicutes; Bacilli; Bacillales; Bacillaceae; Bacillus; Bacillus_cereus                       |
| Otu620  | 146     | 1       | 25      | 23       | 81      | 4        | 17        | 11        | 15        | 4         | 3         | 36        | Bacteria; Bacteroidetes; Cytophagia; Cytophagales; Cytophagaceae; Dyadobacter                           |
| Otu621  | 2       | 0       | 0       | 19       | 1       | 2        | 0         | 0         | 0         | 0         | 1         | 0         | Bacteria; Gemmatimonadetes; Gemmatimonadetes; N1423WL                                                   |
| Otu622  | 12      | 12      | 3       | 10       | 23      | 38       | 5         | 15        | 50        | 67        | 35        | 11        | Bacteria; Proteobacteria; Betaproteobacteria; Rhodocyclales; Rhodocyclaceae; Dechloromonas              |
| Otu623  | 62      | 72      | 48      | 66       | 60      | 151      | 82        | 156       | 80        | 90        | 76        | 29        | Bacteria; Verrucomicrobia; Pedosphaerae; Pedosphaerales                                                 |
| Otu2480 | 1       | 0       | 0       | 0        | 0       | 4        | 1         | 0         | 4         | 0         | 4         | 0         | Bacteria; Cyanobacteria; Chloroplast; Stramenopiles                                                     |
| Otu628  | 9       | 4       | 5       | 13       | 3       | 5        | 8         | 22        | 9         | 5         | 7         | 4         | Bacteria; Proteobacteria; Deltaproteobacteria; Myxococcales                                             |
| Otu629  | 0       | 0       | 1       | 3        | 6       | 0        | 4         | 5         | 2         | 9         | 2         | 27        | Bacteria; Verrucomicrobia; Pedosphaerae                                                                 |
| Otu1943 | 0       | 4       | 0       | 0        | 2       | 0        | 1         | 0         | 0         | 1         | 1         | 1         | Bacteria; Proteobacteria; Betaproteobacteria; SC-I-84                                                   |
| Otu1942 | 2       | 4       | 0       | 1        | 0       | 1        | 0         | 0         | 0         | 0         | 2         | 2         | Bacteria; Armatimonadetes; Chthonomonadetes; SJA-22                                                     |
| Otu1941 | 2       | 6       | 7       | 6        | 2       | 12       | 5         | 4         | 4         | 1         | 10        | 1         | Bacteria; Chloroflexi; Ellin6529                                                                        |
| Otu1940 | 4       | 0       | 0       | 0        | 0       | 0        | 0         | 0         | 0         | 0         | 0         | 0         | Bacteria; Actinobacteria; Actinobacteria; Actinomycetales; Beutenbergiaceae; Salana; Salana_multivorans |
| Otu1947 | 8       | 6       | 9       | 13       | 7       | 23       | 7         | 16        | 8         | 9         | 10        | 4         | Bacteria; Planctomycetes; Phycisphaerae; WD2101                                                         |
| Otu1946 | 0       | 0       | 0       | 0        | 0       | 0        | 0         | 0         | 0         | 0         | 0         | 7         | Bacteria; Bacteroidetes; Saprospirae; Saprospirales; Chitinophagaceae                                   |
| Otu1945 | 0       | 0       | 0       | 0        | 0       | 0        | 0         | 0         | 0         | 4         | 0         | 0         | Bacteria; OD1                                                                                           |
| Otu1944 | 0       | 2       | 0       | 1        | 5       | 2        | 0         | 0         | 0         | 0         | 0         | 1         | Bacteria; Bacteroidetes                                                                                 |
| Otu1949 | 0       | 9       | 5       | 9        | 4       | 0        | 5         | 0         | 0         | 0         | 1         | 0         | Bacteria; Bacteroidetes; Saprospirae; Saprospirales; Chitinophagaceae                                   |
| Otu1948 | 0       | 0       | 0       | 5        | 6       | 0        | 0         | 1         | 2         | 2         | 1         | 1         | Bacteria; Proteobacteria; Alphaproteobacteria; Rickettsiales; mitochondria                              |

| #OTU ID | Z31DRh1 | Z31DRh2 | Z31DRh3 | Z31DRh4r | Z31DRh5 | Z31DRh6r | Z31J1DRh1 | Z31J1DRh2 | Z31J1DRh3 | Z31J1DRh4 | Z31J1DRh5 | Z31J1DRh6 | taxonomy                                                                               |
|---------|---------|---------|---------|----------|---------|----------|-----------|-----------|-----------|-----------|-----------|-----------|----------------------------------------------------------------------------------------|
| Otu3494 | 0       | 0       | 0       | 5        | 0       | 2        | 1         | 3         | 0         | 2         | 1         | 6         | Bacteria; Bacteroidetes; Sphingobacteriia; Sphingobacteriales                          |
| Otu4066 | 0       | 2       | 1       | 3        | 0       | 5        | 2         | 0         | 7         | 0         | 3         | 1         | Bacteria; Acidobacteria; iii1-8; DS-18                                                 |
| Otu3944 | 0       | 1       | 0       | 1        | 0       | 0        | 2         | 0         | 1         | 0         | 0         | 0         | Bacteria; Planctomycetes; Phycisphaerae; Phycisphaerales                               |
| Otu2447 | 4       | 0       | 0       | 0        | 0       | 0        | 0         | 0         | 1         | 0         | 0         | 0         | Bacteria; Bacteroidetes; Cytophagia; Cytophagales; Cytophagaceae                       |
| Otu242  | 40      | 10      | 37      | 56       | 34      | 107      | 11        | 17        | 37        | 13        | 16        | 21        | Bacteria; Proteobacteria; Alphaproteobacteria; Caulobacteriales; Caulobacteraceae      |
| Otu828  | 4       | 1       | 3       | 8        | 4       | 15       | 1         | 3         | 2         | 5         | 1         | 1         | Bacteria; Planctomycetes; Planctomycetia; Pirellulales; Pirellulaceae                  |
| Otu829  | 0       | 14      | 2       | 11       | 1       | 4        | 8         | 0         | 0         | 0         | 1         | 1         | Bacteria; Gemmatimonadetes; Gemm-1                                                     |
| Otu2443 | 2       | 0       | 0       | 3        | 0       | 4        | 1         | 1         | 1         | 1         | 0         | 0         | Bacteria; Proteobacteria; TA18; CV90                                                   |
| Otu2442 | 2       | 4       | 0       | 0        | 2       | 0        | 0         | 0         | 0         | 1         | 1         | 0         | Bacteria; Planctomycetes; Phycisphaerae; WD2101                                        |
| Otu2441 | 0       | 0       | 0       | 0        | 0       | 3        | 1         | 1         | 0         | 0         | 0         | 0         | Bacteria; Chloroflexi; Thermomicrobia; JG30-KF-CM45                                    |
| Otu243  | 11      | 8       | 6       | 29       | 15      | 112      | 3         | 3         | 1         | 6         | 8         | 17        | Bacteria; Proteobacteria; Alphaproteobacteria; Rhizobiales; Brucellaceae; Ochrobactrum |
| Otu822  | 3       | 21      | 6       | 10       | 22      | 33       | 7         | 19        | 18        | 10        | 16        | 5         | Bacteria; Elusimicrobia; Elusimicrobia; FAC88                                          |
| Otu823  | 3       | 3       | 3       | 4        | 3       | 15       | 6         | 5         | 4         | 9         | 4         | 4         | Bacteria; Actinobacteria; Actinobacteria; Actinomycetales; Geodermatophilaceae         |
| Otu820  | 1       | 15      | 10      | 5        | 7       | 2        | 8         | 1         | 0         | 1         | 14        | 0         | Bacteria; Chlorobi                                                                     |
| Otu821  | 2       | 44      | 6       | 6        | 0       | 1        | 19        | 1         | 2         | 1         | 4         | 0         | Bacteria; Proteobacteria; Betaproteobacteria; Burkholderiales; Comamonadaceae          |
| Otu826  | 22      | 20      | 40      | 23       | 14      | 42       | 34        | 30        | 31        | 45        | 19        | 26        | Bacteria; Planctomycetes; Phycisphaerae; WD2101                                        |
| Otu827  | 1       | 3       | 4       | 3        | 2       | 14       | 0         | 1         | 6         | 1         | 0         | 0         | Bacteria; Planctomycetes; Planctomycetia; Pirellulales; Pirellulaceae; Pirellula       |
| Otu824  | 1       | 5       | 0       | 3        | 17      | 13       | 3         | 0         | 1         | 5         | 4         | 16        | Bacteria; Proteobacteria; Betaproteobacteria                                           |
| Otu825  | 20      | 8       | 11      | 20       | 6       | 43       | 6         | 9         | 23        | 15        | 18        | 5         | Bacteria; Proteobacteria; Betaproteobacteria                                           |
| Otu241  | 9       | 1       | 8       | 113      | 1       | 15       | 1         | 0         | 2         | 7         | 0         | 6         | Bacteria; Bacteroidetes; Sphingobacteriia; Sphingobacteriales; Sphingobacteriaceae     |
| Otu4061 | 0       | 1       | 1       | 1        | 0       | 0        | 2         | 1         | 0         | 0         | 0         | 0         | Bacteria; Armatimonadetes; OPB50                                                       |
| Otu3948 | 0       | 0       | 2       | 0        | 0       | 0        | 0         | 0         | 1         | 0         | 0         | 0         | Bacteria; Chloroflexi; Anaerolineae; SBR1031; oc28                                     |

| #OTU ID | Z31DRh1 | Z31DRh2 | Z31DRh3 | Z31DRh4r | Z31DRh5 | Z31DRh6r | Z31J1DRh1 | Z31J1DRh2 | Z31J1DRh3 | Z31J1DRh4 | Z31J1DRh5 | Z31J1DRh6 | taxonomy                                                                                                               |
|---------|---------|---------|---------|----------|---------|----------|-----------|-----------|-----------|-----------|-----------|-----------|------------------------------------------------------------------------------------------------------------------------|
| Otu246  | 53      | 119     | 76      | 153      | 80      | 187      | 122       | 159       | 110       | 95        | 77        | 27        | Bacteria; Chloroflexi; Anaerolineae; SBR1031; A4b                                                                      |
| Otu3428 | 0       | 0       | 0       | 0        | 0       | 3        | 0         | 1         | 0         | 0         | 0         | 0         | Bacteria; Tenericutes; Mollicutes; Anaeroplasmatales; Anaeroplasmataceae; Asteroleplasma                               |
| Otu4060 | 0       | 0       | 0       | 0        | 0       | 0        | 0         | 2         | 1         | 0         | 0         | 0         | Bacteria; Actinobacteria; Thermoleophilia; Solirubrobacterales                                                         |
| Otu247  | 13      | 27      | 7       | 28       | 43      | 26       | 51        | 50        | 29        | 49        | 76        | 20        | Bacteria; Proteobacteria; Deltaproteobacteria; Myxococcales; Myxococcaceae                                             |
| Otu244  | 56      | 47      | 27      | 55       | 48      | 96       | 28        | 29        | 29        | 57        | 57        | 14        | Bacteria; Chloroflexi; Chloroflexi; Roseiflexales; Kouleothrixaceae                                                    |
| Otu245  | 80      | 55      | 84      | 121      | 47      | 130      | 65        | 36        | 108       | 50        | 37        | 101       | Bacteria; Proteobacteria; Alphaproteobacteria; Rhizobiales; Phyllobacteriaceae; Mesorhizobium                          |
| Otu2148 | 0       | 0       | 4       | 2        | 3       | 2        | 1         | 0         | 2         | 3         | 1         | 1         | Bacteria; Bacteroidetes; Cytophagia; Cytophagales; Cytophagaceae                                                       |
| Otu2149 | 0       | 0       | 3       | 0        | 0       | 0        | 0         | 0         | 2         | 0         | 0         | 0         | Bacteria                                                                                                               |
| Otu2142 | 0       | 0       | 0       | 2        | 0       | 3        | 2         | 0         | 1         | 1         | 1         | 0         | Bacteria; Firmicutes; Clostridia; Clostridiales                                                                        |
| Otu2143 | 0       | 0       | 0       | 0        | 0       | 4        | 0         | 0         | 0         | 0         | 0         | 0         | Bacteria; Chlorobi; SJA-28                                                                                             |
| Otu2140 | 6       | 0       | 0       | 0        | 0       | 0        | 0         | 0         | 0         | 0         | 0         | 0         | Bacteria; Proteobacteria; Alphaproteobacteria                                                                          |
| Otu2141 | 0       | 0       | 0       | 0        | 0       | 0        | 0         | 3         | 0         | 0         | 0         | 0         | Bacteria                                                                                                               |
| Otu2146 | 0       | 0       | 0       | 0        | 0       | 0        | 0         | 0         | 0         | 3         | 0         | 0         | Bacteria                                                                                                               |
| Otu2147 | 2       | 1       | 5       | 3        | 2       | 2        | 0         | 0         | 1         | 1         | 0         | 0         | Bacteria; Proteobacteria; Deltaproteobacteria; Myxococcales                                                            |
| Otu2144 | 0       | 3       | 0       | 2        | 0       | 0        | 0         | 1         | 0         | 0         | 2         | 0         | Bacteria; WS3; PRR-12; Sediment-1; PRR-10                                                                              |
| Otu2145 | 0       | 1       | 0       | 0        | 0       | 0        | 0         | 0         | 2         | 0         | 4         | 0         | Bacteria; OD1; SM2F11                                                                                                  |
| Otu1891 | 0       | 0       | 0       | 5        | 0       | 0        | 1         | 1         | 0         | 0         | 3         | 0         | Bacteria; Proteobacteria; Betaproteobacteria                                                                           |
| Otu1890 | 157     | 79      | 126     | 165      | 106     | 92       | 268       | 45        | 125       | 300       | 100       | 166       | Bacteria; Proteobacteria; Betaproteobacteria; Burkholderiales; Comamonadaceae                                          |
| Otu1893 | 0       | 0       | 0       | 0        | 0       | 0        | 0         | 0         | 0         | 0         | 0         | 5         | Bacteria; Bacteroidetes; Flavobacteriia; Flavobacteriales; Weeksellaceae                                               |
| Otu1892 | 3       | 1       | 2       | 6        | 4       | 2        | 2         | 4         | 1         | 5         | 4         | 0         | Bacteria; Proteobacteria; Deltaproteobacteria; Myxococcales                                                            |
| Otu1895 | 145     | 21      | 48      | 128      | 86      | 70       | 64        | 34        | 26        | 37        | 26        | 69        | Bacteria; Proteobacteria; Alphaproteobacteria; Sphingomonadales; Sphingomonadaceae; Novosphingobium                    |
| Otu1894 | 4       | 1       | 2       | 4        | 0       | 10       | 0         | 0         | 0         | 2         | 0         | 1         | Bacteria; Proteobacteria; Deltaproteobacteria; Bdellovibrionales; Bacteriovoraceae; Peredibacter; Peredibacter_starrii |

| #OTU ID | Z31DRh1 | Z31DRh2 | Z31DRh3 | Z31DRh4r | Z31DRh5 | Z31DRh6r | Z31J1DRh1 | Z31J1DRh2 | Z31J1DRh3 | Z31J1DRh4 | Z31J1DRh5 | Z31J1DRh6 | taxonomy                                                                                           |
|---------|---------|---------|---------|----------|---------|----------|-----------|-----------|-----------|-----------|-----------|-----------|----------------------------------------------------------------------------------------------------|
| Otu1897 | 0       | 2       | 0       | 0        | 2       | 4        | 3         | 0         | 0         | 0         | 2         | 0         | Bacteria; Verrucomicrobia; Pedosphaerae; Pedosphaerales; R4-41B                                    |
| Otu1896 | 0       | 0       | 1       | 4        | 0       | 0        | 0         | 2         | 0         | 0         | 1         | 2         | Bacteria; Proteobacteria                                                                           |
| Otu1899 | 0       | 0       | 0       | 0        | 0       | 4        | 0         | 0         | 1         | 1         | 0         | 0         | Bacteria; Proteobacteria                                                                           |
| Otu1898 | 0       | 2       | 0       | 4        | 0       | 0        | 0         | 0         | 0         | 0         | 0         | 0         | Bacteria; Chloroflexi; Anaerolineae; GCA004                                                        |
| Otu3365 | 0       | 0       | 0       | 0        | 0       | 0        | 0         | 0         | 0         | 2         | 0         | 0         | Bacteria; OD1; ZB2                                                                                 |
| Otu4308 | 0       | 2       | 0       | 1        | 0       | 0        | 2         | 0         | 2         | 1         | 0         | 0         | Bacteria; Proteobacteria; Deltaproteobacteria; MIZ46                                               |
| Otu3929 | 0       | 0       | 0       | 0        | 0       | 2        | 0         | 0         | 0         | 0         | 0         | 0         | Bacteria                                                                                           |
| Otu3928 | 0       | 0       | 0       | 0        | 0       | 0        | 0         | 0         | 0         | 0         | 2         | 0         | Bacteria; Proteobacteria; Gammaproteobacteria; Legionellales                                       |
| Otu4420 | 168     | 23      | 23      | 297      | 31      | 454      | 31        | 16        | 32        | 42        | 15        | 141       | Bacteria; Proteobacteria; Betaproteobacteria; Burkholderiales; Comamonadaceae; Acidovorax          |
| Otu3923 | 0       | 1       | 1       | 1        | 0       | 0        | 1         | 0         | 1         | 2         | 1         | 0         | Bacteria; Proteobacteria; Deltaproteobacteria; MIZ46                                               |
| Otu3922 | 0       | 0       | 0       | 0        | 3       | 15       | 0         | 0         | 0         | 0         | 0         | 0         | Bacteria; Proteobacteria; Gammaproteobacteria                                                      |
| Otu3921 | 0       | 0       | 0       | 0        | 0       | 2        | 0         | 0         | 0         | 0         | 0         | 0         | Bacteria; Proteobacteria; Gammaproteobacteria; Legionellales                                       |
| Otu3920 | 0       | 0       | 0       | 0        | 0       | 0        | 0         | 2         | 0         | 0         | 0         | 0         | Bacteria                                                                                           |
| Otu3927 | 0       | 1       | 2       | 0        | 0       | 0        | 1         | 0         | 0         | 0         | 3         | 0         | Bacteria; Chloroflexi; Anaerolineae; SBR1031; A4b                                                  |
| Otu3926 | 0       | 0       | 0       | 0        | 0       | 0        | 0         | 0         | 1         | 0         | 3         | 0         | Bacteria                                                                                           |
| Otu3925 | 0       | 0       | 0       | 1        | 0       | 2        | 0         | 0         | 0         | 0         | 1         | 0         | Bacteria; Planctomycetes; Planctomycetia; Gemmatales; Gemmataceae                                  |
| Otu3924 | 0       | 0       | 0       | 0        | 0       | 0        | 0         | 0         | 0         | 0         | 2         | 0         | Bacteria; Proteobacteria; Deltaproteobacteria; Bdellovibrionales; Bdellovibrionaceae; Bdellovibrio |
| Otu2036 | 0       | 0       | 0       | 0        | 2       | 2        | 5         | 4         | 5         | 0         | 1         | 3         | Bacteria; Gemmatimonadetes; Gemm-1                                                                 |
| Otu2037 | 0       | 1       | 2       | 1        | 0       | 4        | 3         | 3         | 0         | 2         | 0         | 0         | Bacteria; Elusimicrobia; Elusimicrobia; IIb                                                        |
| Otu2034 | 5       | 1       | 1       | 1        | 1       | 5        | 2         | 2         | 3         | 1         | 0         | 1         | Bacteria; Proteobacteria; Deltaproteobacteria; Myxococcales                                        |
| Otu2035 | 0       | 3       | 0       | 0        | 0       | 2        | 0         | 0         | 1         | 3         | 1         | 0         | Bacteria; Proteobacteria; Gammaproteobacteria; Legionellales; Coxiellaceae; Aquicella              |
| Otu2032 | 0       | 3       | 1       | 0        | 0       | 0        | 0         | 0         | 0         | 0         | 1         | 0         | Bacteria; Planctomycetes; Planctomycetia; Pirellulales; Pirellulaceae; Pirellula                   |



| #OTU ID | Z31DRh1 | Z31DRh2 | Z31DRh3 | Z31DRh4r | Z31DRh5 | Z31DRh6r | Z31J1DRh1 | Z31J1DRh2 | Z31J1DRh3 | Z31J1DRh4 | Z31J1DRh5 | Z31J1DRh6 | taxonomy                                                                                          |
|---------|---------|---------|---------|----------|---------|----------|-----------|-----------|-----------|-----------|-----------|-----------|---------------------------------------------------------------------------------------------------|
| Otu2033 | 0       | 0       | 0       | 0        | 3       | 0        | 1         | 1         | 1         | 0         | 0         | 0         | Bacteria; Armatimonadetes; Fimbriimonadia; Fimbriimonadales; Fimbriimonadaceae; Fimbriimonas      |
| Otu2030 | 0       | 6       | 0       | 0        | 0       | 0        | 2         | 0         | 0         | 0         | 8         | 0         | Bacteria; OP3; kol111                                                                             |
| Otu2031 | 0       | 6       | 3       | 1        | 0       | 1        | 4         | 0         | 0         | 0         | 2         | 1         | Bacteria; Actinobacteria; MB-A2-108; 0319-7L14                                                    |
| Otu2038 | 0       | 0       | 0       | 0        | 0       | 0        | 0         | 3         | 0         | 0         | 0         | 0         | Bacteria; Firmicutes; Bacilli; Turicibacterales; Turicibacteraceae; Turicibacter                  |
| Otu2039 | 4       | 0       | 0       | 1        | 0       | 3        | 0         | 0         | 1         | 0         | 0         | 0         | Bacteria; Bacteroidetes; Saprospirae; Saprospirales; Chitinophagaceae                             |
| Otu1769 | 0       | 0       | 0       | 0        | 7       | 1        | 0         | 0         | 0         | 0         | 0         | 0         | Bacteria                                                                                          |
| Otu1768 | 0       | 0       | 0       | 0        | 5       | 2        | 0         | 0         | 0         | 0         | 3         | 0         | Bacteria; Chloroflexi; Anaerolineae; CFB-26                                                       |
| Otu2446 | 0       | 0       | 0       | 3        | 0       | 0        | 0         | 0         | 0         | 0         | 0         | 0         | Bacteria; Proteobacteria; Alphaproteobacteria                                                     |
| Otu1763 | 1       | 1       | 2       | 1        | 3       | 4        | 4         | 0         | 0         | 0         | 0         | 1         | Bacteria; Actinobacteria; Thermoleophilia; Solirubrobacterales                                    |
| Otu1762 | 0       | 1       | 2       | 4        | 0       | 4        | 1         | 0         | 1         | 0         | 0         | 1         | Bacteria; Planctomycetes; Phycisphaerae; Phycisphaerales; Phycisphaeraceae                        |
| Otu1761 | 1       | 2       | 1       | 4        | 6       | 3        | 0         | 1         | 0         | 1         | 2         | 0         | Bacteria; Proteobacteria; Alphaproteobacteria; Rhizobiales                                        |
| Otu1760 | 0       | 2       | 0       | 1        | 4       | 1        | 3         | 0         | 2         | 0         | 0         | 2         | Bacteria; Firmicutes; Clostridia; OPB54                                                           |
| Otu1767 | 0       | 0       | 0       | 0        | 4       | 1        | 2         | 0         | 0         | 0         | 0         | 0         | Bacteria; Proteobacteria; Gammaproteobacteria; Enterobacteriales; Enterobacteriaceae; Erwinia     |
| Otu1766 | 0       | 0       | 0       | 0        | 0       | 0        | 8         | 0         | 0         | 0         | 1         | 0         | Bacteria; Bacteroidetes; Saprospirae; Saprospirales; Saprospiraceae                               |
| Otu1765 | 3       | 4       | 1       | 1        | 4       | 3        | 3         | 17        | 3         | 3         | 3         | 1         | Bacteria; Actinobacteria; Acidimicrobia; Acidimicrobiales                                         |
| Otu1764 | 0       | 0       | 0       | 1        | 0       | 5        | 1         | 1         | 2         | 0         | 0         | 0         | Bacteria; Proteobacteria; Alphaproteobacteria; Rhodospirillales; Acetobacteraceae                 |
| Otu3819 | 0       | 0       | 0       | 2        | 0       | 0        | 0         | 1         | 0         | 0         | 0         | 0         | Bacteria; Proteobacteria; Alphaproteobacteria; Rickettsiales; Rickettsiaceae                      |
| Otu3818 | 0       | 0       | 0       | 0        | 0       | 0        | 0         | 2         | 0         | 0         | 1         | 0         | Bacteria                                                                                          |
| Otu3817 | 2       | 2       | 8       | 5        | 3       | 9        | 2         | 5         | 6         | 7         | 5         | 2         | Bacteria; Actinobacteria; Thermoleophilia; Gaiellales; Gaiellaceae                                |
| Otu3816 | 1       | 6       | 0       | 5        | 4       | 2        | 2         | 0         | 0         | 0         | 4         | 0         | Bacteria; Verrucomicrobia; Pedosphaerae; Pedosphaerales; Ellin515                                 |
| Otu3815 | 13      | 12      | 0       | 10       | 0       | 18       | 0         | 0         | 5         | 5         | 1         | 1         | Bacteria; Proteobacteria; Betaproteobacteria                                                      |
| Otu3814 | 2       | 0       | 0       | 0        | 0       | 0        | 0         | 0         | 0         | 0         | 0         | 0         | Bacteria; Cyanobacteria; Synechococcophycideae; Pseudanabaenales; Pseudanabaenaceae; Leptolyngbya |

| #OTU ID | Z31DRh1 | Z31DRh2 | Z31DRh3 | Z31DRh4r | Z31DRh5 | Z31DRh6r | Z31J1DRh1 | Z31J1DRh2 | Z31J1DRh3 | Z31J1DRh4 | Z31J1DRh5 | Z31J1DRh6 | taxonomy                                                                                                         |
|---------|---------|---------|---------|----------|---------|----------|-----------|-----------|-----------|-----------|-----------|-----------|------------------------------------------------------------------------------------------------------------------|
| Otu3813 | 0       | 0       | 0       | 0        | 0       | 0        | 0         | 0         | 0         | 2         | 0         | 0         | Bacteria; SBR1093                                                                                                |
| Otu3812 | 0       | 0       | 0       | 1        | 0       | 1        | 0         | 2         | 1         | 0         | 1         | 0         | Bacteria; Planctomycetes; Phycisphaerae; CPla-3                                                                  |
| Otu3811 | 0       | 2       | 0       | 0        | 0       | 0        | 0         | 0         | 0         | 1         | 0         | 0         | Bacteria; TM6                                                                                                    |
| Otu3810 | 5       | 4       | 1       | 1        | 1       | 3        | 1         | 0         | 0         | 1         | 1         | 1         | Bacteria; Verrucomicrobia; Spartobacteria; Chthoniobacterales; Chthoniobacteraceae; Candidatus_Xiphinematobacter |
| Otu2445 | 0       | 0       | 3       | 0        | 0       | 0        | 1         | 0         | 0         | 1         | 0         | 0         | Bacteria; Chloroflexi; Anaerolineae; SBR1031; oc28                                                               |
| Otu3366 | 2       | 0       | 0       | 0        | 0       | 0        | 0         | 0         | 0         | 0         | 0         | 0         | Bacteria; Proteobacteria                                                                                         |
| Otu1420 | 1       | 0       | 2       | 4        | 7       | 4        | 3         | 5         | 2         | 6         | 4         | 0         | Bacteria; OD1; ABY1                                                                                              |
| Otu1421 | 6       | 3       | 3       | 4        | 4       | 5        | 4         | 0         | 2         | 0         | 1         | 3         | Bacteria; Proteobacteria; Gammaproteobacteria; Legionellales; Coxiellaceae; Aquicella                            |
| Otu1422 | 2       | 7       | 2       | 3        | 3       | 5        | 3         | 5         | 1         | 8         | 1         | 1         | Bacteria; Proteobacteria; Gammaproteobacteria                                                                    |
| Otu1423 | 0       | 6       | 6       | 6        | 0       | 4        | 4         | 3         | 2         | 0         | 6         | 3         | Bacteria; Acidobacteria; Solibacteres; Solibacterales; Solibacteraceae; Candidatus_Solibacter                    |
| Otu1424 | 6       | 1       | 0       | 0        | 0       | 1        | 0         | 1         | 0         | 1         | 0         | 0         | Bacteria; Verrucomicrobia; Opiritutae; Opiritutales; Opiritutaceae                                               |
| Otu1425 | 7       | 13      | 6       | 6        | 3       | 13       | 16        | 24        | 9         | 5         | 30        | 3         | Bacteria; Gemmatimonadetes; Gemm-1                                                                               |
| Otu1426 | 1       | 10      | 1       | 2        | 0       | 3        | 3         | 0         | 1         | 0         | 6         | 1         | Bacteria; Planctomycetes; Planctomycetia; Planctomycetales; Planctomycetaceae; Planctomyces                      |
| Otu1427 | 3       | 4       | 0       | 3        | 1       | 5        | 3         | 0         | 0         | 5         | 2         | 0         | Bacteria; Chloroflexi; TK10; AKYG885; 5B-12                                                                      |
| Otu1428 | 1       | 2       | 1       | 3        | 1       | 11       | 2         | 1         | 0         | 3         | 1         | 0         | Bacteria; Proteobacteria; Alphaproteobacteria; Rhodospirillales; Acetobacteraceae; Roseomonas                    |
| Otu1429 | 0       | 0       | 0       | 0        | 0       | 7        | 0         | 0         | 0         | 0         | 0         | 0         | Bacteria; Actinobacteria; Thermoleophilia; Solirubrobacterales; Patulibacteraceae; Patulibacter                  |
| Otu2019 | 0       | 1       | 3       | 0        | 0       | 1        | 0         | 1         | 0         | 0         | 6         | 0         | Bacteria                                                                                                         |
| Otu3130 | 0       | 0       | 0       | 0        | 2       | 0        | 0         | 0         | 0         | 0         | 0         | 0         | Bacteria; Proteobacteria; Betaproteobacteria; Burkholderiales; Comamonadaceae                                    |
| Otu3131 | 0       | 0       | 2       | 2        | 0       | 0        | 0         | 0         | 2         | 1         | 2         | 0         | Bacteria; OD1; ZB2                                                                                               |
| Otu3361 | 0       | 0       | 0       | 2        | 0       | 0        | 0         | 0         | 0         | 0         | 0         | 0         | Bacteria; Proteobacteria                                                                                         |
| Otu3132 | 0       | 2       | 0       | 0        | 0       | 0        | 0         | 0         | 0         | 0         | 0         | 0         | Bacteria                                                                                                         |
| Otu4143 | 0       | 3       | 1       | 1        | 3       | 10       | 0         | 1         | 3         | 3         | 3         | 1         | Bacteria; Proteobacteria; Alphaproteobacteria; Ellin329                                                          |

| #OTU ID | Z31DRh1 | Z31DRh2 | Z31DRh3 | Z31DRh4r | Z31DRh5 | Z31DRh6r | Z31J1DRh1 | Z31J1DRh2 | Z31J1DRh3 | Z31J1DRh4 | Z31J1DRh5 | Z31J1DRh6 | taxonomy                                                                                   |
|---------|---------|---------|---------|----------|---------|----------|-----------|-----------|-----------|-----------|-----------|-----------|--------------------------------------------------------------------------------------------|
| Otu2014 | 2       | 0       | 3       | 3        | 0       | 7        | 3         | 0         | 1         | 0         | 3         | 1         | Bacteria; Planctomycetes; Planctomycetia; Pirellulales; Pirellulaceae                      |
| Otu2376 | 1       | 3       | 2       | 3        | 1       | 10       | 0         | 9         | 5         | 1         | 8         | 0         | Bacteria; Tenericutes; Mollicutes; Anaeroplasmatales; Anaeroplasmataceae; Asteroleplasma   |
| Otu2015 | 0       | 0       | 0       | 0        | 0       | 0        | 0         | 0         | 3         | 0         | 0         | 0         | Bacteria; Proteobacteria                                                                   |
| Otu3134 | 0       | 0       | 0       | 1        | 0       | 0        | 0         | 4         | 2         | 0         | 0         | 0         | Bacteria; Proteobacteria                                                                   |
| Otu3135 | 7       | 5       | 4       | 7        | 4       | 7        | 12        | 8         | 6         | 6         | 9         | 10        | Bacteria; Acidobacteria; Acidobacteria-6; iii1-15                                          |
| Otu2858 | 0       | 0       | 0       | 0        | 0       | 0        | 0         | 0         | 0         | 0         | 2         | 0         | Bacteria; Proteobacteria; Gammaproteobacteria                                              |
| Otu2700 | 2       | 0       | 0       | 0        | 0       | 0        | 0         | 0         | 0         | 0         | 0         | 0         | Bacteria; Verrucomicrobia                                                                  |
| Otu4431 | 31      | 33      | 34      | 29       | 11      | 29       | 27        | 34        | 19        | 33        | 7         | 15        | Bacteria; Planctomycetes; Phycisphaerae; WD2101                                            |
| Otu3136 | 2       | 0       | 0       | 0        | 0       | 0        | 0         | 0         | 0         | 0         | 0         | 0         | Bacteria                                                                                   |
| Otu2701 | 0       | 0       | 0       | 0        | 2       | 2        | 0         | 0         | 0         | 0         | 0         | 0         | Bacteria; Proteobacteria; Gammaproteobacteria                                              |
| Otu2850 | 0       | 0       | 2       | 0        | 1       | 0        | 0         | 0         | 0         | 0         | 0         | 0         | Bacteria; Proteobacteria; Gammaproteobacteria; Legionellales; Coxiellaceae                 |
| Otu2851 | 0       | 0       | 3       | 0        | 0       | 0        | 0         | 0         | 0         | 0         | 0         | 1         | Bacteria; Bacteroidetes; Cytophagia; Cytophagales; Cytophagaceae                           |
| Otu2852 | 2       | 0       | 2       | 2        | 0       | 1        | 0         | 1         | 0         | 0         | 0         | 0         | Bacteria                                                                                   |
| Otu2853 | 0       | 0       | 2       | 0        | 0       | 2        | 0         | 0         | 0         | 0         | 2         | 4         | Bacteria; Proteobacteria; Deltaproteobacteria; Myxococcales; Haliangiaceae                 |
| Otu2854 | 2       | 0       | 0       | 0        | 0       | 0        | 0         | 0         | 0         | 0         | 1         | 0         | Bacteria; Bacteroidetes; Cytophagia; Cytophagales; Cytophagaceae                           |
| Otu2855 | 0       | 2       | 0       | 0        | 0       | 0        | 0         | 0         | 0         | 0         | 0         | 0         | Bacteria; Verrucomicrobia                                                                  |
| Otu2856 | 2       | 0       | 0       | 0        | 0       | 0        | 0         | 0         | 0         | 0         | 0         | 0         | Bacteria                                                                                   |
| Otu2857 | 20      | 34      | 27      | 18       | 53      | 68       | 45        | 55        | 29        | 33        | 38        | 20        | Bacteria; Proteobacteria; Alphaproteobacteria; Rhizobiales; Hyphomicrobiaceae; Rhodoplanes |
| Otu1398 | 1       | 0       | 1       | 2        | 1       | 7        | 4         | 0         | 1         | 2         | 1         | 0         | Bacteria; Proteobacteria                                                                   |
| Otu1399 | 1       | 9       | 0       | 0        | 1       | 3        | 4         | 3         | 1         | 1         | 5         | 2         | Bacteria; Actinobacteria; Acidimicrobiia; Acidimicrobiales                                 |
| Otu1392 | 3       | 1       | 6       | 6        | 1       | 5        | 2         | 3         | 1         | 3         | 0         | 3         | Bacteria; Proteobacteria; Alphaproteobacteria; Rhizobiales; Methylocystaceae               |
| Otu1393 | 3       | 5       | 7       | 15       | 7       | 19       | 6         | 6         | 16        | 8         | 14        | 19        | Bacteria; Verrucomicrobia; Pedosphaerae; Pedosphaerales; auto67_4W                         |

| #OTU ID | Z31DRh1 | Z31DRh2 | Z31DRh3 | Z31DRh4r | Z31DRh5 | Z31DRh6r | Z31J1DRh1 | Z31J1DRh2 | Z31J1DRh3 | Z31J1DRh4 | Z31J1DRh5 | Z31J1DRh6 | taxonomy                                                                                                                 |
|---------|---------|---------|---------|----------|---------|----------|-----------|-----------|-----------|-----------|-----------|-----------|--------------------------------------------------------------------------------------------------------------------------|
| Otu1390 | 0       | 0       | 0       | 7        | 0       | 0        | 0         | 0         | 0         | 0         | 0         | 0         | Bacteria; Proteobacteria; Alphaproteobacteria; Sphingomonadales; Sphingomonadaceae                                       |
| Otu1391 | 0       | 2       | 3       | 2        | 1       | 7        | 2         | 4         | 0         | 0         | 1         | 0         | Bacteria; Chloroflexi; Anaerolineae; Caldilineales; Caldilineaceae                                                       |
| Otu1396 | 7       | 0       | 0       | 0        | 0       | 0        | 0         | 0         | 0         | 0         | 0         | 0         | Bacteria; Bacteroidetes; Saprospirae; Saprospirales; Chitinophagaceae                                                    |
| Otu1397 | 2       | 1       | 7       | 4        | 3       | 12       | 1         | 1         | 7         | 4         | 4         | 1         | Bacteria; Armatimonadetes; 0319-6E2                                                                                      |
| Otu1394 | 0       | 3       | 1       | 1        | 3       | 8        | 3         | 1         | 5         | 0         | 2         | 2         | Bacteria; Proteobacteria; Alphaproteobacteria; Rhodospirillales; Acetobacteraceae                                        |
| Otu1395 | 3       | 7       | 2       | 12       | 12      | 25       | 5         | 3         | 6         | 27        | 6         | 10        | Bacteria; Gemmatimonadetes; Gemmatimonadetes; Ellin5290                                                                  |
| Otu29   | 497     | 404     | 258     | 452      | 300     | 702      | 418       | 574       | 339       | 306       | 323       | 47        | Bacteria; Acidobacteria; Chloracidobacteria; RB41; Ellin6075                                                             |
| Otu28   | 42      | 21      | 9       | 614      | 56      | 36       | 12        | 4         | 15        | 32        | 5         | 6         | Bacteria; Proteobacteria; Alphaproteobacteria; Caulobacterales; Caulobacteraceae; Caulobacter                            |
| Otu25   | 541     | 524     | 411     | 660      | 368     | 656      | 623       | 773       | 623       | 680       | 421       | 213       | Bacteria; Bacteroidetes; Saprospirae; Saprospirales; Chitinophagaceae; Flavisolibacter                                   |
| Otu24   | 40      | 22      | 13      | 742      | 7       | 93       | 3         | 11        | 102       | 6         | 7         | 7         | Bacteria; Bacteroidetes; Saprospirae; Saprospirales; Chitinophagaceae                                                    |
| Otu27   | 133     | 86      | 12      | 49       | 68      | 727      | 38        | 15        | 38        | 21        | 25        | 17        | Bacteria; Bacteroidetes; Saprospirae; Saprospirales; Chitinophagaceae                                                    |
| Otu26   | 201     | 127     | 176     | 382      | 144     | 577      | 45        | 42        | 541       | 90        | 98        | 446       | Bacteria; Proteobacteria; Gammaproteobacteria; Pseudomonadales; Pseudomonadaceae; Pseudomonas; Pseudomonas_nitroreducens |
| Otu21   | 151     | 5       | 2       | 10       | 31      | 864      | 5         | 9         | 28        | 10        | 1         | 12        | Bacteria; Cyanobacteria                                                                                                  |
| Otu20   | 968     | 135     | 70      | 541      | 163     | 449      | 114       | 201       | 209       | 169       | 37        | 394       | Bacteria; Proteobacteria; Gammaproteobacteria                                                                            |
| Otu22   | 1       | 0       | 18      | 3        | 167     | 651      | 0         | 0         | 0         | 0         | 0         | 0         | Bacteria; Proteobacteria; Betaproteobacteria                                                                             |
| Otu2708 | 0       | 4       | 0       | 0        | 0       | 0        | 1         | 0         | 0         | 1         | 1         | 0         | Bacteria; Proteobacteria; Alphaproteobacteria; Rhodospirillales; Rhodospirillaceae                                       |
| Otu2709 | 0       | 0       | 0       | 0        | 0       | 2        | 0         | 0         | 0         | 0         | 0         | 0         | Bacteria; Proteobacteria; Deltaproteobacteria                                                                            |
| Otu4212 | 47      | 33      | 27      | 31       | 17      | 25       | 30        | 16        | 11        | 24        | 8         | 7         | Bacteria; Bacteroidetes; Saprospirae; Saprospirales; Chitinophagaceae                                                    |
| Otu3382 | 0       | 0       | 1       | 2        | 1       | 5        | 1         | 2         | 3         | 0         | 2         | 1         | Bacteria; Proteobacteria; Alphaproteobacteria; Rhodospirillales; Acetobacteraceae                                        |
| Otu3115 | 1       | 0       | 0       | 0        | 0       | 2        | 0         | 0         | 1         | 0         | 0         | 1         | Bacteria; Chloroflexi; Thermomicrobia                                                                                    |
| Otu3362 | 4       | 7       | 1       | 3        | 1       | 21       | 4         | 4         | 11        | 2         | 3         | 0         | Bacteria; Acidobacteria; Solibacteres; Solibacterales                                                                    |
| Otu3548 | 1       | 1       | 2       | 2        | 0       | 1        | 0         | 0         | 0         | 1         | 0         | 0         | Bacteria; Proteobacteria; Gammaproteobacteria; Legionellales; Coxiellaceae                                               |

| #OTU ID | Z31DRh1 | Z31DRh2 | Z31DRh3 | Z31DRh4r | Z31DRh5 | Z31DRh6r | Z31J1DRh1 | Z31J1DRh2 | Z31J1DRh3 | Z31J1DRh4 | Z31J1DRh5 | Z31J1DRh6 | taxonomy                                                                                                    |
|---------|---------|---------|---------|----------|---------|----------|-----------|-----------|-----------|-----------|-----------|-----------|-------------------------------------------------------------------------------------------------------------|
| Otu3545 | 0       | 0       | 0       | 0        | 0       | 0        | 0         | 0         | 0         | 0         | 0         | 2         | Bacteria                                                                                                    |
| Otu3544 | 1       | 0       | 2       | 4        | 1       | 1        | 1         | 3         | 0         | 2         | 1         | 0         | Bacteria; Planctomycetes; Planctomycetia; Gemmatales; Gemmataceae                                           |
| Otu3547 | 0       | 0       | 0       | 1        | 0       | 4        | 2         | 0         | 3         | 0         | 1         | 0         | Bacteria; Tenericutes; Mollicutes; Anaeroplasmatales; Anaeroplasmataceae; Asteroleplasma                    |
| Otu3546 | 6       | 5       | 4       | 14       | 10      | 4        | 5         | 2         | 5         | 12        | 6         | 12        | Bacteria; Proteobacteria; Betaproteobacteria; Burkholderiales; Comamonadaceae                               |
| Otu3541 | 2       | 0       | 0       | 0        | 0       | 0        | 0         | 0         | 0         | 0         | 0         | 0         | Bacteria                                                                                                    |
| Otu3540 | 0       | 0       | 0       | 0        | 4       | 2        | 0         | 0         | 0         | 0         | 0         | 0         | Bacteria; Proteobacteria; Deltaproteobacteria; MIZ46                                                        |
| Otu3543 | 0       | 0       | 0       | 0        | 0       | 0        | 0         | 0         | 0         | 0         | 0         | 2         | Bacteria; Proteobacteria; Deltaproteobacteria; Myxococcales                                                 |
| Otu3542 | 0       | 0       | 0       | 0        | 3       | 0        | 0         | 0         | 1         | 0         | 0         | 0         | Bacteria; Proteobacteria; Alphaproteobacteria; Rickettsiales; mitochondria                                  |
| Otu1086 | 0       | 1       | 2       | 9        | 0       | 8        | 0         | 0         | 2         | 0         | 4         | 0         | Bacteria; Chlamydiae; Chlamydia; Chlamydiales                                                               |
| Otu1087 | 0       | 1       | 0       | 1        | 0       | 11       | 2         | 2         | 0         | 0         | 0         | 1         | Bacteria                                                                                                    |
| Otu1084 | 1       | 5       | 1       | 4        | 4       | 25       | 10        | 17        | 12        | 11        | 13        | 1         | Bacteria; Proteobacteria; Gammaproteobacteria                                                               |
| Otu1085 | 5       | 3       | 0       | 1        | 1       | 9        | 2         | 0         | 0         | 0         | 1         | 0         | Bacteria; Proteobacteria; Alphaproteobacteria; Rhodospirillales; Rhodospirillaceae                          |
| Otu1082 | 0       | 4       | 0       | 5        | 2       | 8        | 3         | 4         | 0         | 2         | 2         | 2         | Bacteria; Armatimonadetes; 0319-6E2                                                                         |
| Otu1083 | 1       | 5       | 2       | 2        | 0       | 8        | 2         | 0         | 0         | 2         | 0         | 0         | Bacteria; Planctomycetes; Phycisphaerae; WD2101                                                             |
| Otu1080 | 0       | 0       | 0       | 10       | 0       | 1        | 0         | 0         | 0         | 0         | 0         | 2         | Bacteria; Bacteroidetes; Cytophagia; Cytophagales; Cytophagaceae; Siphonobacter; Siphonobacter_aquaeclearae |
| Otu1081 | 10      | 2       | 13      | 15       | 5       | 13       | 13        | 9         | 12        | 13        | 14        | 3         | Bacteria; Gemmatimonadetes; Gemm-5                                                                          |
| Otu4067 | 1       | 0       | 0       | 0        | 0       | 1        | 2         | 0         | 0         | 0         | 2         | 0         | Bacteria; Proteobacteria; Deltaproteobacteria; Bdellovibrionales; Bdellovibrionaceae; Bdellovibrio          |
| Otu2440 | 0       | 1       | 0       | 0        | 0       | 0        | 3         | 0         | 0         | 0         | 6         | 0         | Bacteria; Acidobacteria; AT-s54                                                                             |
| Otu4065 | 0       | 0       | 0       | 2        | 0       | 2        | 0         | 0         | 0         | 0         | 0         | 0         | Bacteria; Planctomycetes; Planctomycetia; Gemmatales; Gemmataceae                                           |
| Otu4064 | 10      | 8       | 31      | 35       | 12      | 14       | 21        | 1         | 32        | 5         | 6         | 13        | Bacteria; Proteobacteria; Betaproteobacteria; Burkholderiales; Oxalobacteraceae; Cupriavidus                |
| Otu4063 | 11      | 4       | 11      | 50       | 6       | 15       | 11        | 10        | 24        | 17        | 5         | 9         | Bacteria; Proteobacteria; Alphaproteobacteria; Sphingomonadales; Sphingomonadaceae                          |
| Otu4062 | 0       | 1       | 0       | 1        | 0       | 0        | 0         | 0         | 0         | 2         | 0         | 0         | Bacteria; Planctomycetes; Planctomycetia; Pirellulales; Pirellulaceae                                       |

| #OTU ID | Z31DRh1 | Z31DRh2 | Z31DRh3 | Z31DRh4r | Z31DRh5 | Z31DRh6r | Z31J1DRh1 | Z31J1DRh2 | Z31J1DRh3 | Z31J1DRh4 | Z31J1DRh5 | Z31J1DRh6 | taxonomy                                                                                           |
|---------|---------|---------|---------|----------|---------|----------|-----------|-----------|-----------|-----------|-----------|-----------|----------------------------------------------------------------------------------------------------|
| Otu1088 | 0       | 1       | 1       | 26       | 7       | 4        | 1         | 0         | 5         | 5         | 2         | 1         | Bacteria; Proteobacteria; Deltaproteobacteria; Bdellovibrionales; Bdellovibrionaceae; Bdellovibrio |
| Otu1089 | 5       | 3       | 4       | 29       | 2       | 11       | 1         | 1         | 3         | 5         | 1         | 1         | Bacteria; Proteobacteria; Deltaproteobacteria; Bdellovibrionales; Bacteriovoraceae                 |
| Otu3856 | 2       | 1       | 0       | 0        | 1       | 2        | 1         | 0         | 0         | 0         | 1         | 0         | Bacteria                                                                                           |
| Otu2479 | 0       | 1       | 0       | 0        | 2       | 2        | 2         | 0         | 0         | 1         | 4         | 0         | Bacteria; Proteobacteria; Deltaproteobacteria; Bdellovibrionales; Bdellovibrionaceae; Bdellovibrio |
| Otu589  | 13      | 5       | 7       | 15       | 5       | 36       | 11        | 13        | 9         | 13        | 8         | 12        | Bacteria; Armatimonadetes; 0319-6E2                                                                |
| Otu588  | 5       | 4       | 1       | 4        | 4       | 23       | 10        | 6         | 6         | 13        | 4         | 5         | Bacteria; Proteobacteria                                                                           |
| Otu2702 | 0       | 0       | 0       | 0        | 0       | 1        | 1         | 0         | 0         | 0         | 0         | 4         | Bacteria; Proteobacteria; Deltaproteobacteria; MIZ46                                               |
| Otu2703 | 0       | 0       | 0       | 0        | 2       | 0        | 0         | 0         | 0         | 0         | 0         | 0         | Bacteria; Proteobacteria; Gammaproteobacteria                                                      |
| Otu2704 | 0       | 0       | 0       | 2        | 0       | 0        | 0         | 0         | 0         | 0         | 0         | 0         | Bacteria; Firmicutes; Clostridia; Clostridiales; Veillonellaceae                                   |
| Otu2705 | 1       | 2       | 0       | 5        | 0       | 0        | 2         | 4         | 1         | 0         | 2         | 0         | Bacteria; Acidobacteria; Solibacteres; Solibacterales; Bryobacteraceae                             |
| Otu2706 | 0       | 0       | 0       | 0        | 0       | 0        | 0         | 0         | 2         | 0         | 0         | 0         | Bacteria                                                                                           |
| Otu2707 | 0       | 0       | 0       | 0        | 0       | 0        | 0         | 0         | 0         | 3         | 3         | 1         | Bacteria; Bacteroidetes; Cytophagia; Cytophagales                                                  |
| Otu581  | 11      | 7       | 4       | 22       | 6       | 9        | 4         | 5         | 4         | 1         | 1         | 4         | Bacteria; Cyanobacteria; 4C0d-2; SM1D11                                                            |
| Otu580  | 5       | 0       | 11      | 19       | 40      | 7        | 3         | 12        | 1         | 8         | 5         | 7         | Bacteria; Verrucomicrobia; Verrucomicrobiae; Verrucomicrobiales; Verrucomicrobiaceae               |
| Otu583  | 2       | 6       | 10      | 21       | 5       | 7        | 7         | 27        | 19        | 2         | 11        | 3         | Bacteria; Armatimonadetes; Chthonomonadetes; Chthonomonadales; Chthonomonadaceae                   |
| Otu582  | 0       | 0       | 15      | 22       | 0       | 0        | 0         | 0         | 0         | 0         | 2         | 0         | Bacteria; TM6; SJA-4                                                                               |
| Otu585  | 14      | 79      | 20      | 55       | 19      | 31       | 53        | 23        | 21        | 27        | 52        | 26        | Bacteria; Actinobacteria; Thermoleophilia; Gaiellales; Gaiellaceae                                 |
| Otu584  | 0       | 0       | 22      | 11       | 2       | 0        | 0         | 0         | 0         | 0         | 1         | 1         | Bacteria                                                                                           |
| Otu587  | 7       | 34      | 11      | 22       | 16      | 19       | 18        | 13        | 13        | 18        | 28        | 7         | Bacteria; Gemmatimonadetes; Gemmatimonadetes                                                       |
| Otu586  | 8       | 7       | 11      | 21       | 13      | 47       | 8         | 34        | 38        | 6         | 21        | 2         | Bacteria; Planctomycetes; Phycisphaerae; WD2101                                                    |
| Otu1172 | 2       | 3       | 5       | 8        | 1       | 7        | 0         | 1         | 4         | 7         | 0         | 5         | Bacteria; Armatimonadetes; Fimbriimonadia; Fimbriimonadales; Fimbriimonadaceae; Fimbriimonas       |
| Otu1173 | 6       | 0       | 0       | 2        | 0       | 15       | 0         | 0         | 1         | 1         | 0         | 6         | Bacteria; Proteobacteria                                                                           |

| #OTU ID | Z31DRh1 | Z31DRh2 | Z31DRh3 | Z31DRh4r | Z31DRh5 | Z31DRh6r | Z31J1DRh1 | Z31J1DRh2 | Z31J1DRh3 | Z31J1DRh4 | Z31J1DRh5 | Z31J1DRh6 | taxonomy                                                                                               |
|---------|---------|---------|---------|----------|---------|----------|-----------|-----------|-----------|-----------|-----------|-----------|--------------------------------------------------------------------------------------------------------|
| Otu1170 | 6       | 3       | 3       | 11       | 2       | 1        | 9         | 3         | 7         | 1         | 4         | 12        | Bacteria; Proteobacteria; Betaproteobacteria; Rhodocyclales; Rhodocyclaceae                            |
| Otu458  | 18      | 4       | 3       | 13       | 2       | 50       | 5         | 7         | 17        | 1         | 4         | 24        | Bacteria; Actinobacteria; Actinobacteria; Actinomycetales; Microbacteriaceae; Agromyces                |
| Otu1176 | 15      | 9       | 9       | 17       | 12      | 19       | 17        | 8         | 11        | 16        | 14        | 4         | Bacteria; Proteobacteria; Deltaproteobacteria; Myxococcales                                            |
| Otu1177 | 0       | 9       | 0       | 0        | 2       | 3        | 8         | 5         | 1         | 0         | 0         | 1         | Bacteria                                                                                               |
| Otu1174 | 6       | 6       | 2       | 7        | 2       | 6        | 8         | 3         | 0         | 0         | 9         | 4         | Bacteria; Proteobacteria; Deltaproteobacteria; Syntrophobacteriales; Syntrophobacteraceae              |
| Otu1175 | 0       | 0       | 0       | 0        | 8       | 1        | 0         | 0         | 0         | 0         | 0         | 0         | Bacteria; Bacteroidetes; Flavobacteriia; Flavobacteriales; Cryomorphaeae; Fluviicola                   |
| Otu453  | 9       | 44      | 25      | 10       | 14      | 9        | 17        | 20        | 14        | 24        | 39        | 8         | Bacteria; Gemmatimonadetes; Gemmatimonadetes; Ellin5290                                                |
| Otu452  | 2       | 4       | 5       | 5        | 13      | 36       | 13        | 4         | 15        | 22        | 5         | 4         | Bacteria; Proteobacteria; Alphaproteobacteria                                                          |
| Otu451  | 7       | 3       | 12      | 23       | 15      | 33       | 13        | 20        | 14        | 27        | 23        | 5         | Bacteria; Verrucomicrobia; Pedosphaerae; Pedosphaerales; Ellin517                                      |
| Otu450  | 9       | 0       | 1       | 5        | 12      | 38       | 6         | 4         | 0         | 8         | 0         | 2         | Bacteria; Bacteroidetes; Saprospirae; Saprospirales; Chitinophagaceae; Lacibacter; Lacibacter_cauensis |
| Otu457  | 9       | 0       | 0       | 0        | 0       | 31       | 0         | 0         | 11        | 0         | 1         | 0         | Bacteria; Proteobacteria; Deltaproteobacteria; Myxococcales                                            |
| Otu456  | 6       | 16      | 11      | 13       | 3       | 19       | 16        | 30        | 18        | 36        | 18        | 13        | Bacteria; Bacteroidetes; Saprospirae; Saprospirales; Chitinophagaceae; Segetibacter                    |
| Otu455  | 5       | 1       | 9       | 13       | 12      | 35       | 3         | 8         | 18        | 6         | 13        | 7         | Bacteria; Chloroflexi; Chloroflexi; Roseiflexales; Kouleothrixaceae                                    |
| Otu454  | 3       | 1       | 4       | 42       | 0       | 0        | 0         | 0         | 0         | 0         | 1         | 0         | Bacteria; Bacteroidetes; Saprospirae; Saprospirales; Chitinophagaceae                                  |
| Otu1374 | 1       | 0       | 0       | 1        | 1       | 0        | 1         | 0         | 0         | 0         | 1         | 7         | Bacteria; Bacteroidetes; Sphingobacteriia; Sphingobacteriales                                          |
| Otu1375 | 0       | 7       | 0       | 0        | 0       | 0        | 0         | 0         | 0         | 0         | 1         | 0         | Bacteria; TM6; SBRH58                                                                                  |
| Otu1376 | 1       | 13      | 4       | 4        | 0       | 2        | 4         | 0         | 0         | 0         | 1         | 1         | Bacteria                                                                                               |
| Otu1377 | 1       | 2       | 0       | 0        | 3       | 7        | 0         | 0         | 1         | 0         | 0         | 0         | Bacteria; FBP                                                                                          |
| Otu1370 | 8       | 0       | 0       | 5        | 1       | 0        | 4         | 0         | 3         | 8         | 1         | 2         | Bacteria; Bacteroidetes; Sphingobacteriia; Sphingobacteriales                                          |
| Otu1371 | 0       | 0       | 0       | 0        | 13      | 0        | 0         | 0         | 0         | 0         | 0         | 0         | Bacteria; Proteobacteria; Betaproteobacteria                                                           |
| Otu1372 | 1       | 5       | 0       | 8        | 3       | 0        | 1         | 0         | 0         | 0         | 5         | 0         | Bacteria; Bacteroidetes; Saprospirae; Saprospirales; Chitinophagaceae                                  |
| Otu1373 | 3       | 11      | 2       | 7        | 0       | 0        | 3         | 1         | 2         | 1         | 8         | 0         | Bacteria; Acidobacteria; Chloracidobacteria; RB41                                                      |

| #OTU ID | Z31DRh1 | Z31DRh2 | Z31DRh3 | Z31DRh4r | Z31DRh5 | Z31DRh6r | Z31J1DRh1 | Z31J1DRh2 | Z31J1DRh3 | Z31J1DRh4 | Z31J1DRh5 | Z31J1DRh6 | taxonomy                                                                                         |
|---------|---------|---------|---------|----------|---------|----------|-----------|-----------|-----------|-----------|-----------|-----------|--------------------------------------------------------------------------------------------------|
| Otu1378 | 0       | 0       | 0       | 2        | 0       | 1        | 2         | 0         | 7         | 0         | 0         | 1         | Bacteria; Proteobacteria; Gammaproteobacteria; Legionellales                                     |
| Otu1379 | 0       | 2       | 3       | 1        | 6       | 1        | 0         | 3         | 3         | 0         | 3         | 2         | Bacteria                                                                                         |
| Otu1853 | 0       | 2       | 2       | 1        | 0       | 10       | 1         | 7         | 9         | 1         | 2         | 6         | Bacteria; Planctomycetes; Planctomycetia; Gemmatales; Gemmataceae; Gemmata                       |
| Otu459  | 11      | 0       | 8       | 35       | 4       | 5        | 0         | 2         | 2         | 1         | 1         | 5         | Bacteria; Proteobacteria; Alphaproteobacteria; Rhodospirillales; Rhodospirillaceae; Azospirillum |
| Otu3725 | 0       | 0       | 0       | 0        | 2       | 0        | 0         | 1         | 1         | 0         | 0         | 0         | Bacteria; Proteobacteria; Betaproteobacteria                                                     |
| Otu3724 | 3       | 1       | 0       | 1        | 0       | 3        | 0         | 2         | 0         | 0         | 0         | 1         | Bacteria; Proteobacteria; Deltaproteobacteria; Myxococcales                                      |
| Otu3727 | 0       | 0       | 2       | 0        | 0       | 0        | 0         | 0         | 0         | 0         | 0         | 0         | Bacteria; Proteobacteria; Betaproteobacteria; Burkholderiales                                    |
| Otu1171 | 11      | 4       | 6       | 17       | 11      | 18       | 20        | 27        | 10        | 13        | 4         | 3         | Bacteria; Acidobacteria; Acidobacteriia; Acidobacteriales; Acidobacteriaceae                     |
| Otu2638 | 1       | 0       | 1       | 0        | 2       | 0        | 0         | 0         | 0         | 1         | 1         | 0         | Bacteria; Planctomycetes; Planctomycetia; Gemmatales; Gemmataceae; Gemmata                       |
| Otu2639 | 1       | 0       | 0       | 0        | 0       | 2        | 1         | 0         | 2         | 0         | 0         | 0         | Bacteria; Proteobacteria                                                                         |
| Otu3723 | 1       | 0       | 1       | 0        | 0       | 1        | 1         | 2         | 0         | 0         | 0         | 0         | Bacteria                                                                                         |
| Otu3668 | 0       | 0       | 0       | 0        | 0       | 0        | 0         | 0         | 1         | 0         | 2         | 0         | Bacteria; Proteobacteria; Gammaproteobacteria                                                    |
| Otu2634 | 1       | 4       | 3       | 5        | 2       | 0        | 3         | 0         | 0         | 3         | 0         | 0         | Bacteria; Proteobacteria; Gammaproteobacteria; Legionellales; Coxiellaceae                       |
| Otu2635 | 0       | 0       | 1       | 0        | 3       | 0        | 2         | 8         | 6         | 0         | 2         | 2         | Bacteria; Elusimicrobia; Elusimicrobia; FAC88                                                    |
| Otu2636 | 0       | 2       | 0       | 0        | 0       | 0        | 2         | 0         | 0         | 0         | 0         | 0         | Bacteria; Bacteroidetes; Saprospirae; Saprospirales; Chitinophagaceae                            |
| Otu2637 | 0       | 1       | 0       | 0        | 0       | 1        | 0         | 0         | 0         | 0         | 2         | 0         | Bacteria; Proteobacteria; Betaproteobacteria; Ellin6067                                          |
| Otu2630 | 0       | 0       | 0       | 1        | 0       | 0        | 0         | 3         | 0         | 0         | 4         | 1         | Bacteria; Planctomycetes; Planctomycetia; Gemmatales; Gemmataceae                                |
| Otu2631 | 0       | 0       | 0       | 0        | 0       | 0        | 0         | 0         | 0         | 0         | 2         | 0         | Bacteria; Chloroflexi; Thermomicrobia; JG30-KF-CM45                                              |
| Otu2632 | 0       | 2       | 0       | 0        | 0       | 0        | 0         | 0         | 0         | 0         | 0         | 0         | Bacteria; Acidobacteria; Solibacteres; Solibacterales; Solibacteraceae; Candidatus_Solibacter    |
| Otu2633 | 0       | 0       | 0       | 0        | 0       | 0        | 0         | 0         | 0         | 0         | 2         | 0         | Bacteria; Bacteroidetes; Cytophagia; Cytophagales; Cytophagaceae                                 |
| Otu4287 | 0       | 0       | 0       | 0        | 0       | 0        | 0         | 2         | 0         | 0         | 0         | 0         | Bacteria; Planctomycetes; Planctomycetia; Gemmatales; Isosphaeraceae                             |
| Otu4286 | 0       | 0       | 0       | 0        | 0       | 0        | 1         | 0         | 0         | 0         | 2         | 0         | Bacteria; Proteobacteria                                                                         |



| #OTU ID | Z31DRh1 | Z31DRh2 | Z31DRh3 | Z31DRh4r | Z31DRh5 | Z31DRh6r | Z31J1DRh1 | Z31J1DRh2 | Z31J1DRh3 | Z31J1DRh4 | Z31J1DRh5 | Z31J1DRh6 | taxonomy                                                                                                                     |
|---------|---------|---------|---------|----------|---------|----------|-----------|-----------|-----------|-----------|-----------|-----------|------------------------------------------------------------------------------------------------------------------------------|
| Otu4285 | 0       | 0       | 0       | 0        | 0       | 2        | 0         | 0         | 0         | 0         | 0         | 0         | Bacteria                                                                                                                     |
| Otu4284 | 1       | 0       | 0       | 1        | 0       | 1        | 3         | 0         | 0         | 1         | 1         | 0         | Bacteria; Firmicutes; Clostridia; Clostridiales; Peptostreptococcaceae; Tepidibacter                                         |
| Otu4283 | 0       | 1       | 0       | 3        | 0       | 0        | 0         | 0         | 0         | 0         | 1         | 0         | Bacteria; Nitrospirae; Nitrospira; Nitrospirales; FW; 4-29                                                                   |
| Otu4282 | 14      | 45      | 12      | 20       | 31      | 48       | 42        | 13        | 7         | 19        | 38        | 13        | Bacteria; Proteobacteria; Alphaproteobacteria; Rhizobiales; Hyphomicrobiaceae; Rhodoplanes                                   |
| Otu4281 | 0       | 0       | 2       | 0        | 0       | 1        | 0         | 1         | 0         | 0         | 0         | 0         | Bacteria; Planctomycetes; Planctomycetia; Gemmatales; Isosphaeraceae                                                         |
| Otu4280 | 1       | 1       | 0       | 0        | 1       | 1        | 0         | 2         | 0         | 0         | 0         | 0         | Bacteria; Verrucomicrobia; Pedosphaerae; Pedosphaerales                                                                      |
| Otu4334 | 0       | 0       | 0       | 0        | 2       | 0        | 0         | 0         | 0         | 0         | 0         | 0         | Bacteria                                                                                                                     |
| Otu4289 | 0       | 2       | 2       | 0        | 0       | 0        | 1         | 4         | 0         | 1         | 1         | 1         | Bacteria; Planctomycetes; Phycisphaerae; Phycisphaerales; Phycisphaeraceae                                                   |
| Otu4288 | 0       | 0       | 0       | 0        | 0       | 3        | 0         | 0         | 1         | 0         | 1         | 0         | Bacteria; Proteobacteria                                                                                                     |
| Otu3493 | 1       | 0       | 2       | 0        | 0       | 1        | 2         | 0         | 0         | 0         | 0         | 0         | Bacteria; Planctomycetes; Planctomycetia; Gemmatales; Gemmataceae; Gemmata                                                   |
| Otu3515 | 1       | 0       | 1       | 1        | 0       | 0        | 2         | 0         | 1         | 0         | 0         | 1         | Bacteria; Proteobacteria; Deltaproteobacteria; Myxococcales                                                                  |
| Otu3492 | 0       | 2       | 0       | 0        | 0       | 0        | 0         | 0         | 0         | 0         | 0         | 0         | Bacteria; TM7; TM7-1                                                                                                         |
| Otu1529 | 2       | 15      | 8       | 4        | 15      | 12       | 11        | 5         | 1         | 7         | 8         | 4         | Bacteria; Planctomycetes; Phycisphaerae; WD2101                                                                              |
| Otu1178 | 0       | 1       | 0       | 0        | 2       | 7        | 0         | 0         | 0         | 0         | 0         | 0         | Bacteria; Proteobacteria; Alphaproteobacteria; Rickettsiales; mitochondria                                                   |
| Otu1528 | 2       | 5       | 4       | 6        | 10      | 22       | 9         | 7         | 7         | 7         | 10        | 1         | Bacteria; Proteobacteria; Deltaproteobacteria; Myxococcales; Haliangiaceae                                                   |
| Otu1179 | 0       | 0       | 0       | 0        | 4       | 9        | 0         | 0         | 0         | 0         | 0         | 0         | Bacteria; Proteobacteria; Betaproteobacteria; Procabacteriales; Procabacteriaceae                                            |
| Otu129  | 62      | 58      | 70      | 164      | 66      | 111      | 87        | 109       | 73        | 98        | 76        | 54        | Bacteria; Acidobacteria; Solibacteres; Solibacterales; Solibacteraceae; Candidatus_Solibacter                                |
| Otu128  | 58      | 98      | 82      | 124      | 13      | 210      | 63        | 25        | 47        | 9         | 16        | 106       | Bacteria; Proteobacteria; Gammaproteobacteria; Pseudomonadales; Pseudomonadaceae; Pseudomonas; Pseudomonas_pseudoalcaligenes |
| Otu127  | 57      | 61      | 32      | 48       | 32      | 222      | 31        | 116       | 77        | 17        | 33        | 50        | Bacteria; Bacteroidetes; Cytophagia; Cytophagales; Cytophagaceae                                                             |
| Otu126  | 41      | 190     | 47      | 76       | 104     | 59       | 81        | 24        | 24        | 64        | 93        | 44        | Bacteria; Acidobacteria; Acidobacteria-6; iii1-15                                                                            |
| Otu125  | 34      | 16      | 21      | 48       | 1       | 2        | 49        | 10        | 53        | 23        | 1         | 175       | Bacteria; Firmicutes; Bacilli; Bacillales; Paenibacillaceae; Paenibacillus                                                   |
| Otu124  | 67      | 87      | 48      | 80       | 23      | 158      | 71        | 104       | 60        | 75        | 98        | 119       | Bacteria; Proteobacteria; Betaproteobacteria; Nitrosomonadales; Nitrosomonadaceae                                            |

| #OTU ID | Z31DRh1 | Z31DRh2 | Z31DRh3 | Z31DRh4r | Z31DRh5 | Z31DRh6r | Z31J1DRh1 | Z31J1DRh2 | Z31J1DRh3 | Z31J1DRh4 | Z31J1DRh5 | Z31J1DRh6 | taxonomy                                                                                                                 |
|---------|---------|---------|---------|----------|---------|----------|-----------|-----------|-----------|-----------|-----------|-----------|--------------------------------------------------------------------------------------------------------------------------|
| Otu123  | 47      | 95      | 63      | 137      | 39      | 105      | 101       | 115       | 35        | 118       | 107       | 45        | Bacteria; Gemmatimonadetes; Gemmatimonadetes; Gemmatimonadales                                                           |
| Otu122  | 98      | 211     | 100     | 89       | 82      | 70       | 106       | 83        | 32        | 153       | 172       | 25        | Bacteria; Verrucomicrobia; Spartobacteria; Chthoniobacteriales; Chthoniobacteraceae; DA101                               |
| Otu121  | 72      | 37      | 76      | 123      | 57      | 156      | 40        | 177       | 99        | 93        | 47        | 42        | Bacteria; Verrucomicrobia; Pedosphaerae; Pedosphaerales                                                                  |
| Otu120  | 314     | 52      | 111     | 235      | 87      | 222      | 143       | 63        | 121       | 128       | 69        | 140       | Bacteria; Proteobacteria; Alphaproteobacteria; Sphingomonadales; Sphingomonadaceae                                       |
| Otu909  | 21      | 11      | 69      | 95       | 44      | 16       | 78        | 2         | 24        | 36        | 6         | 55        | Bacteria; Proteobacteria; Betaproteobacteria                                                                             |
| Otu908  | 2       | 0       | 0       | 0        | 0       | 0        | 0         | 0         | 0         | 0         | 0         | 14        | Bacteria; Bacteroidetes; Saprospirae; Saprospirales; Chitinophagaceae                                                    |
| Otu905  | 10      | 1       | 5       | 0        | 0       | 13       | 2         | 1         | 2         | 1         | 1         | 0         | Bacteria; Proteobacteria; Alphaproteobacteria; Sphingomonadales; Sphingomonadaceae; Sphingomonas; Sphingomonas_wittichii |
| Otu904  | 5       | 10      | 6       | 14       | 3       | 27       | 9         | 24        | 13        | 7         | 15        | 3         | Bacteria; Actinobacteria; Acidimicrobia; Acidimicrobiales                                                                |
| Otu907  | 0       | 0       | 0       | 2        | 0       | 0        | 0         | 0         | 11        | 1         | 0         | 0         | Bacteria; ODI; ZB2                                                                                                       |
| Otu906  | 4       | 12      | 3       | 4        | 0       | 8        | 7         | 4         | 8         | 1         | 6         | 6         | Bacteria; Proteobacteria; Alphaproteobacteria; Rhodospirillales; Rhodospirillaceae                                       |
| Otu901  | 11      | 7       | 1       | 10       | 7       | 10       | 4         | 1         | 0         | 3         | 4         | 2         | Bacteria; Planctomycetes; Planctomycetia; Pirellulales; Pirellulaceae                                                    |
| Otu900  | 4       | 10      | 10      | 19       | 4       | 15       | 15        | 18        | 14        | 3         | 9         | 5         | Bacteria; Planctomycetes; Phycisphaerae; WD2101                                                                          |
| Otu903  | 6       | 6       | 0       | 13       | 9       | 16       | 4         | 6         | 14        | 9         | 3         | 5         | Bacteria; Proteobacteria; Alphaproteobacteria; BD7-3                                                                     |
| Otu902  | 11      | 16      | 1       | 6        | 14      | 26       | 20        | 10        | 10        | 7         | 11        | 22        | Bacteria; Actinobacteria; Actinobacteria; Actinomycetales; Nocardioidaceae; Kribbella                                    |
| Otu2528 | 0       | 0       | 0       | 0        | 0       | 0        | 0         | 1         | 0         | 0         | 3         | 0         | Bacteria; Chlamydiae; Chlamydia; Chlamydiales                                                                            |
| Otu2529 | 0       | 3       | 2       | 6        | 0       | 3        | 4         | 2         | 0         | 1         | 1         | 1         | Bacteria; Proteobacteria; Deltaproteobacteria; Myxococcales                                                              |
| Otu3033 | 0       | 2       | 1       | 1        | 1       | 1        | 0         | 0         | 0         | 0         | 1         | 0         | Bacteria; Actinobacteria; MB-A2-108; 0319-7L14                                                                           |
| Otu1526 | 0       | 0       | 2       | 1        | 0       | 1        | 1         | 6         | 1         | 0         | 0         | 0         | Bacteria; Actinobacteria; Actinobacteria; Actinomycetales                                                                |
| Otu3035 | 0       | 0       | 0       | 2        | 1       | 2        | 1         | 0         | 1         | 0         | 1         | 2         | Bacteria; Planctomycetes; Planctomycetia; Gemmatales; Gemmataceae                                                        |
| Otu3034 | 0       | 0       | 2       | 2        | 1       | 1        | 1         | 4         | 2         | 0         | 1         | 0         | Bacteria; Planctomycetes; Planctomycetia; Gemmatales; Isosphaeraeae                                                      |
| Otu3037 | 2       | 1       | 0       | 4        | 1       | 4        | 1         | 0         | 0         | 0         | 3         | 0         | Bacteria; Proteobacteria; Gammaproteobacteria; Legionellales; Coxiellaceae; Aquicella                                    |
| Otu3036 | 0       | 0       | 0       | 0        | 0       | 0        | 0         | 0         | 0         | 0         | 2         | 0         | Bacteria; Proteobacteria; Deltaproteobacteria; Myxococcales                                                              |

| #OTU ID | Z31DRh1 | Z31DRh2 | Z31DRh3 | Z31DRh4r | Z31DRh5 | Z31DRh6r | Z31J1DRh1 | Z31J1DRh2 | Z31J1DRh3 | Z31J1DRh4 | Z31J1DRh5 | Z31J1DRh6 | taxonomy                                                                                                               |
|---------|---------|---------|---------|----------|---------|----------|-----------|-----------|-----------|-----------|-----------|-----------|------------------------------------------------------------------------------------------------------------------------|
| Otu2520 | 3       | 3       | 0       | 0        | 0       | 2        | 0         | 3         | 2         | 1         | 1         | 0         | Bacteria; Tenericutes; Mollicutes; Anaeroplasmatales; Anaeroplasmataceae; Asteroleplasma                               |
| Otu2521 | 0       | 0       | 0       | 0        | 0       | 0        | 0         | 3         | 2         | 1         | 0         | 0         | Bacteria; Elusimicrobia; Elusimicrobia; FAC88                                                                          |
| Otu2522 | 4       | 11      | 1       | 1        | 3       | 0        | 8         | 0         | 3         | 2         | 2         | 2         | Bacteria; TM7; TM7-1                                                                                                   |
| Otu2449 | 2       | 0       | 0       | 0        | 3       | 0        | 0         | 0         | 0         | 0         | 0         | 0         | Bacteria; Cyanobacteria; Chloroplast; Stramenopiles                                                                    |
| Otu2524 | 0       | 0       | 0       | 0        | 1       | 0        | 0         | 3         | 1         | 0         | 0         | 0         | Bacteria; Planctomycetes; Phycisphaerae; WD2101                                                                        |
| Otu2525 | 1       | 2       | 3       | 4        | 1       | 9        | 0         | 0         | 4         | 3         | 1         | 0         | Bacteria; Planctomycetes; Phycisphaerae; WD2101                                                                        |
| Otu2526 | 11      | 6       | 2       | 5        | 3       | 13       | 1         | 0         | 3         | 3         | 1         | 2         | Bacteria; Planctomycetes; Planctomycetia; Gemmatales; Gemmataceae; Gemmata                                             |
| Otu2527 | 39      | 26      | 50      | 64       | 26      | 111      | 43        | 53        | 51        | 26        | 33        | 44        | Bacteria; Proteobacteria; Gammaproteobacteria; Xanthomonadales; Xanthomonadaceae                                       |
| Otu633  | 9       | 10      | 4       | 8        | 5       | 26       | 1         | 16        | 2         | 0         | 1         | 9         | Bacteria; Actinobacteria; Actinobacteria; Actinomycetales; Nocardiaceae; Nocardia                                      |
| Otu632  | 1       | 4       | 2       | 4        | 3       | 6        | 4         | 2         | 25        | 4         | 3         | 0         | Bacteria; Proteobacteria; Deltaproteobacteria; Myxococcales                                                            |
| Otu631  | 2       | 11      | 10      | 10       | 9       | 16       | 6         | 20        | 5         | 3         | 7         | 0         | Bacteria; Acidobacteria; Acidobacteria-5                                                                               |
| Otu630  | 5       | 8       | 2       | 15       | 8       | 19       | 31        | 24        | 15        | 2         | 12        | 3         | Bacteria; Chloroflexi; Anaerolineae; SBR1031; oc28                                                                     |
| Otu637  | 8       | 6       | 13      | 19       | 7       | 19       | 10        | 5         | 11        | 9         | 23        | 6         | Bacteria; Gemmatimonadetes; Gemmatimonadetes                                                                           |
| Otu636  | 6       | 0       | 7       | 4        | 6       | 5        | 7         | 21        | 24        | 21        | 8         | 6         | Bacteria; Planctomycetes; vadinHA49; DH61                                                                              |
| Otu635  | 0       | 3       | 2       | 0        | 6       | 0        | 3         | 4         | 2         | 34        | 1         | 7         | Bacteria; Proteobacteria; Gammaproteobacteria; Xanthomonadales; Sinobacteraceae; Alkanibacter; Alkanibacter_difficilis |
| Otu634  | 5       | 2       | 18      | 12       | 6       | 8        | 3         | 6         | 32        | 2         | 12        | 3         | Bacteria; Verrucomicrobia; Spartobacteria; Chthoniobacteriales; Chthoniobacteraceae; Ellin506                          |
| Otu3038 | 0       | 0       | 0       | 2        | 0       | 0        | 0         | 0         | 0         | 0         | 0         | 0         | Bacteria                                                                                                               |
| Otu639  | 1       | 7       | 1       | 3        | 3       | 7        | 6         | 1         | 1         | 5         | 22        | 1         | Bacteria; Proteobacteria; Gammaproteobacteria; Xanthomonadales; Sinobacteraceae                                        |
| Otu638  | 8       | 2       | 7       | 14       | 12      | 24       | 18        | 34        | 10        | 6         | 13        | 3         | Bacteria; Acidobacteria; Acidobacteriia; Acidobacteriales; Acidobacteriaceae                                           |
| Otu3250 | 0       | 1       | 2       | 4        | 2       | 1        | 1         | 0         | 3         | 0         | 4         | 3         | Bacteria; Bacteroidetes; Sphingobacteriia; Sphingobacteriales                                                          |
| Otu1950 | 0       | 1       | 2       | 0        | 0       | 2        | 1         | 0         | 5         | 3         | 0         | 0         | Bacteria; Cyanobacteria; 4C0d-2; SM1D11                                                                                |
| Otu1951 | 0       | 4       | 0       | 1        | 2       | 2        | 2         | 0         | 0         | 0         | 6         | 0         | Bacteria; Proteobacteria; Deltaproteobacteria; Myxococcales; Myxococcaceae; Anaeromyxobacter                           |

| #OTU ID | Z31DRh1 | Z31DRh2 | Z31DRh3 | Z31DRh4r | Z31DRh5 | Z31DRh6r | Z31J1DRh1 | Z31J1DRh2 | Z31J1DRh3 | Z31J1DRh4 | Z31J1DRh5 | Z31J1DRh6 | taxonomy                                                                                          |
|---------|---------|---------|---------|----------|---------|----------|-----------|-----------|-----------|-----------|-----------|-----------|---------------------------------------------------------------------------------------------------|
| Otu1952 | 0       | 0       | 1       | 0        | 0       | 1        | 3         | 0         | 0         | 1         | 2         | 0         | Bacteria; Proteobacteria; Alphaproteobacteria; Rhodospirillales; Rhodospirillaceae                |
| Otu1953 | 0       | 0       | 0       | 0        | 3       | 0        | 0         | 0         | 0         | 0         | 0         | 0         | Bacteria; Proteobacteria                                                                          |
| Otu1954 | 5       | 3       | 1       | 1        | 3       | 1        | 1         | 1         | 0         | 1         | 1         | 2         | Bacteria; Planctomycetes; Planctomycetia; Gemmatales; Gemmataceae; Gemmata                        |
| Otu1955 | 3       | 3       | 0       | 9        | 0       | 7        | 1         | 4         | 2         | 2         | 0         | 4         | Bacteria; Planctomycetes; Planctomycetia; Planctomycetales; Planctomycetaceae; Planctomyces       |
| Otu1956 | 10      | 12      | 6       | 16       | 7       | 18       | 12        | 24        | 6         | 7         | 14        | 4         | Bacteria; Proteobacteria; Betaproteobacteria                                                      |
| Otu1957 | 0       | 0       | 0       | 0        | 1       | 0        | 1         | 0         | 3         | 0         | 3         | 1         | Bacteria; TM7; SC3                                                                                |
| Otu1958 | 1       | 3       | 1       | 2        | 5       | 1        | 7         | 8         | 5         | 3         | 0         | 1         | Bacteria; Proteobacteria; Alphaproteobacteria                                                     |
| Otu1959 | 0       | 3       | 2       | 0        | 0       | 2        | 0         | 0         | 3         | 2         | 0         | 0         | Bacteria; Proteobacteria; Deltaproteobacteria; MIZ46                                              |
| Otu3156 | 1       | 1       | 3       | 0        | 2       | 1        | 0         | 1         | 0         | 3         | 0         | 0         | Bacteria; Gemmatimonadetes; Gemmatimonadetes; Ellin5290                                           |
| Otu3157 | 0       | 0       | 0       | 0        | 0       | 0        | 0         | 1         | 2         | 0         | 3         | 0         | Bacteria; TM7; SC3                                                                                |
| Otu3154 | 0       | 0       | 0       | 1        | 1       | 0        | 0         | 0         | 0         | 1         | 2         | 0         | Bacteria; OD1; ZB2                                                                                |
| Otu2572 | 3       | 6       | 0       | 1        | 1       | 1        | 1         | 0         | 0         | 0         | 1         | 0         | Bacteria; Planctomycetes; Planctomycetia; Planctomycetales; Planctomycetaceae; Planctomyces       |
| Otu3152 | 0       | 2       | 0       | 0        | 0       | 0        | 0         | 0         | 0         | 0         | 0         | 0         | Bacteria; Acidobacteria                                                                           |
| Otu3153 | 0       | 0       | 0       | 0        | 3       | 0        | 0         | 0         | 0         | 0         | 0         | 0         | Bacteria; Planctomycetes; Planctomycetia; Gemmatales; Gemmataceae; Gemmata; Gemmata_obscuriglobus |
| Otu3150 | 0       | 2       | 0       | 0        | 0       | 0        | 0         | 0         | 0         | 1         | 2         | 1         | Bacteria; Chloroflexi; Thermomicrobia; JG30-KF-CM45                                               |
| Otu3151 | 3       | 6       | 0       | 0        | 2       | 2        | 3         | 0         | 2         | 3         | 1         | 4         | Bacteria; Actinobacteria; Actinobacteria; Actinomycetales; Nocardioidaceae                        |
| Otu3158 | 0       | 0       | 0       | 1        | 1       | 1        | 0         | 2         | 2         | 0         | 0         | 0         | Bacteria; Proteobacteria; Deltaproteobacteria; Myxococcales                                       |
| Otu3159 | 0       | 2       | 3       | 1        | 0       | 1        | 1         | 1         | 3         | 1         | 3         | 0         | Bacteria                                                                                          |
| Otu839  | 12      | 1       | 2       | 6        | 7       | 1        | 0         | 0         | 0         | 0         | 2         | 0         | Bacteria; Armatimonadetes; Armatimonadia; Armatimonadales; Armatimonadaceae                       |
| Otu838  | 4       | 16      | 1       | 12       | 4       | 1        | 6         | 1         | 0         | 3         | 6         | 0         | Bacteria; Acidobacteria; Chloracidobacteria; RB41                                                 |
| Otu2456 | 11      | 3       | 6       | 5        | 1       | 11       | 1         | 0         | 1         | 1         | 7         | 8         | Bacteria; Verrucomicrobia; Opitutae; Opitutales; Opitutaceae                                      |
| Otu2457 | 0       | 4       | 1       | 2        | 0       | 0        | 0         | 0         | 0         | 0         | 0         | 0         | Bacteria; Proteobacteria; Gammaproteobacteria                                                     |

| #OTU ID | Z31DRh1 | Z31DRh2 | Z31DRh3 | Z31DRh4r | Z31DRh5 | Z31DRh6r | Z31J1DRh1 | Z31J1DRh2 | Z31J1DRh3 | Z31J1DRh4 | Z31J1DRh5 | Z31J1DRh6 | taxonomy                                                                                        |
|---------|---------|---------|---------|----------|---------|----------|-----------|-----------|-----------|-----------|-----------|-----------|-------------------------------------------------------------------------------------------------|
| Otu2450 | 10      | 18      | 12      | 18       | 16      | 29       | 9         | 16        | 24        | 33        | 11        | 8         | Bacteria; Verrucomicrobia; Opirituae; Opirituales; Opiritaceae; Opiritus                        |
| Otu2451 | 0       | 0       | 0       | 0        | 3       | 9        | 0         | 0         | 0         | 2         | 0         | 0         | Bacteria; Chlamydiae; Chlamydia; Chlamydiales; Parachlamydiaceae                                |
| Otu2452 | 1       | 0       | 0       | 1        | 0       | 1        | 5         | 1         | 0         | 1         | 0         | 0         | Bacteria; Cyanobacteria; 4C0d-2; SM1D11                                                         |
| Otu2453 | 8       | 4       | 4       | 2        | 0       | 5        | 4         | 0         | 4         | 9         | 3         | 1         | Bacteria; TM7; SC3                                                                              |
| Otu831  | 6       | 14      | 6       | 4        | 13      | 13       | 11        | 18        | 18        | 20        | 17        | 3         | Bacteria; Planctomycetes; vadinHA49; DH61                                                       |
| Otu830  | 2       | 0       | 2       | 20       | 0       | 0        | 6         | 2         | 2         | 3         | 3         | 1         | Bacteria; Proteobacteria; Deltaproteobacteria; Myxococcales                                     |
| Otu833  | 0       | 0       | 0       | 0        | 1       | 13       | 1         | 0         | 12        | 0         | 5         | 6         | Bacteria; Chloroflexi; Ktedonobacteria; Thermogemmatisporales                                   |
| Otu832  | 12      | 19      | 13      | 13       | 10      | 12       | 18        | 2         | 6         | 13        | 21        | 3         | Bacteria; Planctomycetes; Phycisphaerae; WD2101                                                 |
| Otu835  | 69      | 32      | 40      | 73       | 38      | 61       | 40        | 42        | 38        | 34        | 27        | 12        | Bacteria; Proteobacteria; Alphaproteobacteria; Rhizobiales; Hyphomicrobiaceae; Rhodoplanes      |
| Otu834  | 2       | 0       | 3       | 1        | 0       | 50       | 3         | 2         | 0         | 0         | 1         | 0         | Bacteria; TM7; TM7-1                                                                            |
| Otu837  | 2       | 0       | 0       | 9        | 8       | 2        | 0         | 0         | 0         | 1         | 16        | 0         | Bacteria; Bacteroidetes; Cytophagia; Cytophagales; Cytophagaceae                                |
| Otu836  | 8       | 14      | 2       | 2        | 2       | 14       | 7         | 1         | 0         | 8         | 8         | 2         | Bacteria; Armatimonadetes; Fimbriimonadia; Fimbriimonadales; Fimbriimonadaceae; Fimbriimonas    |
| Otu4231 | 2       | 2       | 1       | 1        | 2       | 4        | 4         | 0         | 7         | 0         | 5         | 2         | Bacteria; Proteobacteria; Deltaproteobacteria; Myxococcales; Haliangiaceae                      |
| Otu3340 | 0       | 0       | 1       | 0        | 0       | 4        | 0         | 0         | 0         | 0         | 0         | 0         | Bacteria; Bacteroidetes; Cytophagia; Cytophagales; Cytophagaceae; Spirosoma                     |
| Otu3252 | 0       | 3       | 2       | 1        | 1       | 3        | 1         | 0         | 0         | 0         | 3         | 0         | Bacteria; Actinobacteria; Acidimicrobia; Acidimicrobiales; C111                                 |
| Otu3346 | 0       | 0       | 0       | 0        | 0       | 0        | 0         | 0         | 0         | 0         | 2         | 0         | Bacteria; Chlamydiae; Chlamydia; Chlamydiales; Parachlamydiaceae                                |
| Otu3345 | 0       | 0       | 0       | 1        | 0       | 0        | 0         | 0         | 2         | 1         | 1         | 0         | Bacteria                                                                                        |
| Otu3355 | 0       | 2       | 1       | 0        | 2       | 1        | 5         | 2         | 2         | 0         | 0         | 0         | Bacteria; Proteobacteria; Gammaproteobacteria; Xanthomonadales; Sinobacteraceae; Steroidobacter |
| Otu2212 | 0       | 0       | 0       | 0        | 0       | 0        | 0         | 0         | 0         | 0         | 3         | 0         | Bacteria; OD1; ABY1                                                                             |
| Otu2213 | 0       | 0       | 0       | 0        | 0       | 2        | 3         | 2         | 3         | 0         | 3         | 0         | Bacteria; Proteobacteria; Gammaproteobacteria; Legionellales; Coxiellaceae; Aquicella           |
| Otu2210 | 28      | 62      | 58      | 54       | 30      | 108      | 43        | 59        | 29        | 53        | 53        | 23        | Bacteria; Acidobacteria; Acidobacteria-6; iii1-15                                               |
| Otu2211 | 0       | 0       | 0       | 0        | 0       | 0        | 5         | 0         | 0         | 0         | 0         | 0         | Bacteria; Firmicutes; Bacilli; Gemellales; Gemellaceae                                          |

| #OTU ID | Z31DRh1 | Z31DRh2 | Z31DRh3 | Z31DRh4r | Z31DRh5 | Z31DRh6r | Z31J1DRh1 | Z31J1DRh2 | Z31J1DRh3 | Z31J1DRh4 | Z31J1DRh5 | Z31J1DRh6 | taxonomy                                                                                                           |
|---------|---------|---------|---------|----------|---------|----------|-----------|-----------|-----------|-----------|-----------|-----------|--------------------------------------------------------------------------------------------------------------------|
| Otu1888 | 1       | 0       | 0       | 0        | 0       | 0        | 0         | 0         | 0         | 2         | 5         | 0         | Bacteria; OD1; SM2F11                                                                                              |
| Otu1889 | 0       | 6       | 0       | 2        | 1       | 1        | 4         | 0         | 0         | 0         | 4         | 3         | Bacteria; Gemmatimonadetes; Gemmatimonadetes                                                                       |
| Otu1886 | 1       | 1       | 2       | 0        | 1       | 1        | 8         | 3         | 0         | 1         | 1         | 1         | Bacteria; Proteobacteria; Alphaproteobacteria; Rhizobiales                                                         |
| Otu1887 | 0       | 3       | 0       | 2        | 0       | 0        | 0         | 1         | 4         | 1         | 1         | 0         | Bacteria; Actinobacteria; Acidimicrobiia; Acidimicrobiales                                                         |
| Otu1884 | 3       | 1       | 2       | 3        | 0       | 0        | 0         | 0         | 1         | 1         | 5         | 0         | Bacteria; Bacteroidetes                                                                                            |
| Otu1885 | 7       | 7       | 3       | 8        | 2       | 2        | 4         | 1         | 2         | 6         | 2         | 3         | Bacteria; Acidobacteria; Acidobacteria-6; iii1-15; mb2424                                                          |
| Otu1882 | 0       | 1       | 1       | 8        | 1       | 15       | 2         | 0         | 0         | 0         | 3         | 0         | Bacteria; Proteobacteria; Gammaproteobacteria; Pseudomonadales; Pseudomonadaceae; Pseudomonas; Pseudomonas_veronii |
| Otu1883 | 0       | 2       | 2       | 5        | 0       | 0        | 5         | 0         | 4         | 0         | 3         | 2         | Bacteria; Proteobacteria; Deltaproteobacteria; MIZ46                                                               |
| Otu1880 | 0       | 0       | 0       | 4        | 0       | 0        | 0         | 0         | 0         | 1         | 0         | 0         | Bacteria; Firmicutes; Clostridia; Clostridiales; Lachnospiraceae; Blautia                                          |
| Otu1881 | 0       | 4       | 0       | 0        | 0       | 0        | 2         | 0         | 0         | 0         | 0         | 0         | Bacteria; Proteobacteria; Deltaproteobacteria; MIZ46                                                               |
| Otu732  | 8       | 3       | 1       | 22       | 21      | 3        | 1         | 4         | 0         | 0         | 1         | 6         | Bacteria                                                                                                           |
| Otu2214 | 0       | 0       | 0       | 0        | 0       | 3        | 0         | 2         | 0         | 1         | 0         | 0         | Bacteria; TM7; SC3                                                                                                 |
| Otu4253 | 0       | 3       | 0       | 2        | 2       | 2        | 3         | 0         | 0         | 0         | 1         | 1         | Bacteria; WS3; PRR-12; Sediment-1; PRR-10                                                                          |
| Otu733  | 20      | 29      | 30      | 8        | 11      | 16       | 9         | 2         | 10        | 16        | 20        | 10        | Bacteria; Proteobacteria; Betaproteobacteria; SC-I-84                                                              |
| Otu2215 | 1       | 1       | 1       | 0        | 0       | 6        | 4         | 1         | 2         | 2         | 0         | 0         | Bacteria; Planctomycetes; Planctomycetia; Pirellulales; Pirellulaceae                                              |
| Otu730  | 34      | 0       | 2       | 23       | 8       | 10       | 4         | 8         | 12        | 1         | 1         | 26        | Bacteria; Proteobacteria; Alphaproteobacteria; Sphingomonadales; Sphingomonadaceae; Sphingopyxis                   |
| Otu3938 | 0       | 0       | 0       | 0        | 3       | 0        | 0         | 0         | 0         | 0         | 0         | 0         | Bacteria; Chloroflexi; Ktedonobacteria; Thermogemmatissporales; Thermogemmatissporaceae                            |
| Otu3185 | 0       | 1       | 0       | 1        | 0       | 0        | 0         | 0         | 0         | 2         | 0         | 0         | Bacteria; TM7; TM7-1                                                                                               |
| Otu731  | 17      | 0       | 0       | 0        | 0       | 0        | 0         | 0         | 0         | 0         | 2         | 0         | Bacteria; Verrucomicrobia; Opitutae; Opitutales; Opitutaceae                                                       |
| Otu3184 | 0       | 3       | 2       | 0        | 1       | 2        | 0         | 4         | 1         | 3         | 2         | 2         | Bacteria; Planctomycetes; Planctomycetia; Gemmatales; Isosphaeraceae                                               |
| Otu3930 | 0       | 0       | 0       | 2        | 0       | 0        | 0         | 1         | 0         | 0         | 0         | 0         | Bacteria; Firmicutes; Clostridia; Clostridiales; Lachnospiraceae; Ruminococcus; Ruminococcus_gnavus                |
| Otu736  | 1       | 15      | 0       | 3        | 0       | 0        | 10        | 7         | 1         | 0         | 0         | 0         | Bacteria; Proteobacteria; Alphaproteobacteria                                                                      |

| #OTU ID | Z31DRh1 | Z31DRh2 | Z31DRh3 | Z31DRh4r | Z31DRh5 | Z31DRh6r | Z31J1DRh1 | Z31J1DRh2 | Z31J1DRh3 | Z31J1DRh4 | Z31J1DRh5 | Z31J1DRh6 | taxonomy                                                                                           |
|---------|---------|---------|---------|----------|---------|----------|-----------|-----------|-----------|-----------|-----------|-----------|----------------------------------------------------------------------------------------------------|
| Otu3932 | 0       | 1       | 0       | 1        | 2       | 2        | 0         | 0         | 1         | 0         | 0         | 0         | Bacteria                                                                                           |
| Otu3933 | 0       | 0       | 0       | 0        | 0       | 0        | 0         | 0         | 2         | 0         | 0         | 0         | Bacteria; Proteobacteria                                                                           |
| Otu3934 | 0       | 0       | 0       | 0        | 4       | 3        | 0         | 0         | 1         | 1         | 2         | 0         | Bacteria; OD1; ZB2                                                                                 |
| Otu3187 | 0       | 0       | 0       | 3        | 0       | 0        | 0         | 0         | 0         | 0         | 0         | 0         | Bacteria; Proteobacteria; Deltaproteobacteria; Spirobacliales                                      |
| Otu3123 | 30      | 2       | 74      | 108      | 15      | 9        | 36        | 12        | 19        | 5         | 3         | 146       | Bacteria; Bacteroidetes; Sphingobacteria; Sphingobacteriales; Sphingobacteriaceae                  |
| Otu737  | 8       | 37      | 21      | 20       | 33      | 24       | 23        | 10        | 14        | 4         | 29        | 14        | Bacteria; Chloroflexi; Ellin6529                                                                   |
| Otu2043 | 0       | 0       | 0       | 0        | 0       | 5        | 5         | 0         | 1         | 0         | 0         | 1         | Bacteria; Proteobacteria; Alphaproteobacteria; Rhodospirillales; Rhodospirillaceae                 |
| Otu2042 | 0       | 0       | 0       | 0        | 0       | 0        | 0         | 0         | 3         | 0         | 0         | 0         | Bacteria; Actinobacteria; Thermoleophilia; Solirubrobacterales                                     |
| Otu2041 | 2       | 4       | 2       | 4        | 0       | 4        | 0         | 1         | 1         | 3         | 4         | 1         | Bacteria; Armatimonadetes; 0319-6E2                                                                |
| Otu2040 | 0       | 1       | 0       | 2        | 0       | 1        | 0         | 0         | 0         | 0         | 4         | 0         | Bacteria; Proteobacteria; Deltaproteobacteria; MBNT15                                              |
| Otu2047 | 4       | 0       | 0       | 3        | 0       | 12       | 0         | 1         | 0         | 4         | 1         | 0         | Bacteria; Proteobacteria; Deltaproteobacteria; FAC87                                               |
| Otu734  | 1       | 0       | 1       | 17       | 1       | 6        | 0         | 0         | 0         | 0         | 0         | 2         | Bacteria; Proteobacteria; Deltaproteobacteria; Bdellovibrionales; Bdellovibrionaceae; Bdellovibrio |
| Otu2045 | 0       | 6       | 1       | 2        | 1       | 0        | 2         | 1         | 0         | 0         | 0         | 1         | Bacteria; Chloroflexi; P2-11E                                                                      |
| Otu2044 | 0       | 3       | 1       | 1        | 1       | 0        | 2         | 3         | 4         | 0         | 1         | 1         | Bacteria; Proteobacteria; Gammaproteobacteria; Legionellales                                       |
| Otu2069 | 0       | 1       | 0       | 2        | 0       | 7        | 0         | 0         | 0         | 0         | 0         | 1         | Bacteria; Acidobacteria; Acidobacteria-6; iii1-15; mb2424                                          |
| Otu3181 | 0       | 0       | 0       | 0        | 0       | 2        | 0         | 0         | 0         | 0         | 0         | 0         | Bacteria; Bacteroidetes; Sphingobacteria; Sphingobacteriales; Sphingobacteriaceae                  |
| Otu2049 | 0       | 1       | 0       | 3        | 1       | 2        | 4         | 2         | 7         | 3         | 3         | 0         | Bacteria; Bacteroidetes; Sphingobacteria; Sphingobacteriales; Sphingobacteriaceae                  |
| Otu735  | 4       | 0       | 4       | 1        | 1       | 24       | 0         | 0         | 2         | 0         | 1         | 2         | Bacteria; Cyanobacteria; Synechococcophycideae; Pseudanabaenales                                   |
| Otu3180 | 0       | 0       | 0       | 0        | 0       | 0        | 0         | 0         | 3         | 0         | 0         | 0         | Bacteria; Proteobacteria; Alphaproteobacteria                                                      |
| Otu1778 | 6       | 1       | 2       | 5        | 0       | 5        | 2         | 5         | 4         | 7         | 4         | 2         | Bacteria; Proteobacteria; Alphaproteobacteria; Rhodospirillales; Acetobacteraceae                  |
| Otu1779 | 0       | 0       | 0       | 0        | 0       | 1        | 6         | 3         | 1         | 4         | 0         | 4         | Bacteria; Chlamydiae; Chlamydia; Chlamydiales                                                      |
| Otu2287 | 0       | 0       | 1       | 6        | 1       | 0        | 2         | 0         | 1         | 0         | 0         | 0         | Bacteria; OP11; OP11-3                                                                             |

| #OTU ID | Z31DRh1 | Z31DRh2 | Z31DRh3 | Z31DRh4r | Z31DRh5 | Z31DRh6r | Z31J1DRh1 | Z31J1DRh2 | Z31J1DRh3 | Z31J1DRh4 | Z31J1DRh5 | Z31J1DRh6 | taxonomy                                                                                           |
|---------|---------|---------|---------|----------|---------|----------|-----------|-----------|-----------|-----------|-----------|-----------|----------------------------------------------------------------------------------------------------|
| Otu2286 | 1       | 2       | 0       | 0        | 0       | 0        | 0         | 3         | 3         | 3         | 3         | 0         | Bacteria                                                                                           |
| Otu2281 | 0       | 1       | 0       | 0        | 0       | 0        | 0         | 3         | 0         | 0         | 0         | 0         | Bacteria                                                                                           |
| Otu2280 | 10      | 9       | 9       | 6        | 4       | 10       | 14        | 6         | 4         | 9         | 9         | 7         | Bacteria; Proteobacteria; Gammaproteobacteria; Xanthomonadales; Sinobacteraceae                    |
| Otu2283 | 0       | 0       | 0       | 0        | 0       | 0        | 1         | 0         | 0         | 0         | 4         | 0         | Bacteria                                                                                           |
| Otu2282 | 3       | 0       | 0       | 0        | 0       | 2        | 1         | 2         | 1         | 1         | 0         | 0         | Bacteria; Proteobacteria; Deltaproteobacteria; Myxococcales                                        |
| Otu1770 | 1       | 1       | 0       | 3        | 1       | 0        | 2         | 0         | 6         | 8         | 0         | 97        | Bacteria; Firmicutes; Bacilli; Bacillales; Paenibacillaceae; Paenibacillus                         |
| Otu1771 | 4       | 6       | 4       | 3        | 6       | 1        | 4         | 3         | 0         | 0         | 3         | 1         | Bacteria; Bacteroidetes; Cytophagia; Cytophagales; Cytophagaceae; Adhaeribacter                    |
| Otu1772 | 0       | 8       | 1       | 0        | 1       | 0        | 1         | 2         | 0         | 1         | 1         | 0         | Bacteria; Chloroflexi; Anaerolineae; SBR1031; oc28                                                 |
| Otu1773 | 0       | 4       | 0       | 0        | 0       | 0        | 0         | 0         | 0         | 0         | 0         | 0         | Bacteria; Verrucomicrobia; Verrucomicrobiae; Verrucomicrobiales; Verrucomicrobiaceae               |
| Otu1774 | 3       | 0       | 3       | 4        | 0       | 11       | 1         | 1         | 2         | 0         | 0         | 1         | Bacteria; Proteobacteria; Deltaproteobacteria; Bdellovibrionales; Bdellovibrionaceae; Bdellovibrio |
| Otu1775 | 0       | 0       | 0       | 0        | 0       | 0        | 5         | 0         | 3         | 0         | 0         | 4         | Bacteria; Proteobacteria; Deltaproteobacteria; MIZ46                                               |
| Otu1776 | 0       | 1       | 3       | 0        | 8       | 9        | 4         | 4         | 3         | 2         | 8         | 2         | Bacteria; Proteobacteria; Alphaproteobacteria; Rhodospirillales; Rhodospirillaceae                 |
| Otu1777 | 1       | 2       | 1       | 5        | 0       | 6        | 0         | 0         | 5         | 2         | 1         | 1         | Bacteria; Proteobacteria; Deltaproteobacteria                                                      |
| Otu3726 | 1       | 3       | 4       | 1        | 3       | 1        | 1         | 5         | 5         | 0         | 4         | 3         | Bacteria; Proteobacteria; Betaproteobacteria; SC-I-84                                              |
| Otu3808 | 1       | 0       | 0       | 2        | 7       | 2        | 1         | 1         | 1         | 0         | 1         | 4         | Bacteria; Actinobacteria; Actinobacteria; Actinomycetales                                          |
| Otu3809 | 3       | 2       | 1       | 1        | 1       | 1        | 0         | 2         | 0         | 0         | 0         | 0         | Bacteria; Proteobacteria; Deltaproteobacteria; Myxococcales                                        |
| Otu4220 | 1       | 0       | 0       | 0        | 2       | 1        | 0         | 0         | 0         | 0         | 0         | 0         | Bacteria; Proteobacteria; Alphaproteobacteria; Rickettsiales; mitochondria                         |
| Otu3804 | 1       | 0       | 1       | 0        | 0       | 6        | 2         | 0         | 0         | 0         | 0         | 0         | Bacteria; Chlorobi; OPB56                                                                          |
| Otu3721 | 0       | 0       | 0       | 2        | 0       | 0        | 0         | 0         | 0         | 0         | 0         | 0         | Bacteria; Bacteroidetes                                                                            |
| Otu3806 | 3       | 4       | 5       | 9        | 8       | 4        | 4         | 5         | 1         | 4         | 3         | 0         | Bacteria; Proteobacteria; Deltaproteobacteria; Myxococcales                                        |
| Otu3807 | 0       | 0       | 1       | 0        | 0       | 2        | 0         | 1         | 2         | 0         | 0         | 0         | Bacteria; Firmicutes; Clostridia; Clostridiales; Gracilibacteraceae; Gracilibacter                 |
| Otu3800 | 0       | 0       | 2       | 1        | 0       | 2        | 4         | 8         | 1         | 1         | 0         | 1         | Bacteria; Verrucomicrobia; Pedosphaerae; Pedosphaerales                                            |



| #OTU ID | Z31DRh1 | Z31DRh2 | Z31DRh3 | Z31DRh4r | Z31DRh5 | Z31DRh6r | Z31J1DRh1 | Z31J1DRh2 | Z31J1DRh3 | Z31J1DRh4 | Z31J1DRh5 | Z31J1DRh6 | taxonomy                                                                                   |
|---------|---------|---------|---------|----------|---------|----------|-----------|-----------|-----------|-----------|-----------|-----------|--------------------------------------------------------------------------------------------|
| Otu3801 | 0       | 0       | 1       | 0        | 0       | 2        | 0         | 5         | 0         | 2         | 1         | 0         | Bacteria; Chloroflexi; Thermomicrobia; AKYG1722                                            |
| Otu3359 | 0       | 0       | 0       | 2        | 0       | 0        | 0         | 0         | 0         | 0         | 0         | 0         | Bacteria                                                                                   |
| Otu3720 | 0       | 0       | 0       | 0        | 0       | 1        | 0         | 0         | 0         | 0         | 2         | 0         | Bacteria; Cyanobacteria; 4C0d-2; MLE1-12                                                   |
| Otu4030 | 1       | 0       | 0       | 2        | 0       | 4        | 1         | 3         | 4         | 0         | 1         | 2         | Bacteria; Chloroflexi; Ktedonobacteria; Thermogemmatissporales; Thermogemmatissporaceae    |
| Otu4111 | 0       | 0       | 0       | 0        | 0       | 2        | 0         | 0         | 0         | 0         | 0         | 0         | Bacteria; Cyanobacteria; Synechococcophycidae; Pseudanabaenales; Pseudanabaenaceae         |
| Otu2936 | 0       | 0       | 0       | 3        | 0       | 0        | 0         | 0         | 0         | 0         | 1         | 0         | Bacteria; Chloroflexi; TK10; B07_WMSP1                                                     |
| Otu3722 | 1       | 0       | 0       | 1        | 0       | 2        | 1         | 0         | 1         | 0         | 2         | 0         | Bacteria; Chloroflexi; C0119                                                               |
| Otu4032 | 0       | 0       | 0       | 0        | 0       | 0        | 0         | 0         | 0         | 0         | 2         | 0         | Bacteria; Bacteroidetes; Sphingobacteria; Sphingobacteriales                               |
| Otu4184 | 0       | 0       | 0       | 0        | 0       | 0        | 0         | 0         | 0         | 0         | 2         | 0         | Bacteria; Proteobacteria; Betaproteobacteria                                               |
| Otu2934 | 0       | 0       | 0       | 0        | 0       | 2        | 0         | 0         | 0         | 0         | 0         | 0         | Bacteria                                                                                   |
| Otu1419 | 2       | 1       | 3       | 5        | 0       | 6        | 2         | 4         | 2         | 1         | 3         | 1         | Bacteria; Proteobacteria; Gammaproteobacteria; Legionellales; Coxiellaceae                 |
| Otu1418 | 3       | 2       | 2       | 3        | 7       | 6        | 2         | 9         | 9         | 0         | 8         | 4         | Bacteria; Chloroflexi; Ktedonobacteria; JG30-KF-AS9                                        |
| Otu1415 | 5       | 2       | 0       | 2        | 4       | 16       | 3         | 1         | 4         | 5         | 2         | 0         | Bacteria; Cyanobacteria; Chloroplast; Stramenopiles                                        |
| Otu1414 | 0       | 0       | 0       | 0        | 6       | 1        | 0         | 0         | 0         | 0         | 0         | 0         | Bacteria; Chloroflexi; Anaerolineae; SBR1031; A4b                                          |
| Otu1417 | 0       | 7       | 0       | 2        | 6       | 4        | 6         | 5         | 9         | 1         | 10        | 2         | Bacteria; Elusimicrobia; Elusimicrobia; FAC88                                              |
| Otu1416 | 17      | 21      | 4       | 25       | 9       | 17       | 12        | 14        | 7         | 37        | 23        | 3         | Bacteria; Bacteroidetes; Cytophagia; Cytophagales; Cytophagaceae                           |
| Otu1411 | 0       | 0       | 0       | 0        | 6       | 0        | 0         | 0         | 0         | 0         | 0         | 0         | Bacteria; Cyanobacteria; 4C0d-2; MLE1-12                                                   |
| Otu1410 | 12      | 27      | 15      | 15       | 17      | 28       | 20        | 37        | 13        | 14        | 16        | 20        | Bacteria; Proteobacteria; Alphaproteobacteria; Rhizobiales; Hyphomicrobiaceae; Rhodoplanes |
| Otu1413 | 0       | 0       | 1       | 3        | 3       | 9        | 0         | 0         | 0         | 0         | 7         | 0         | Bacteria; Planctomycetes; Phycisphaerae; WD2101                                            |
| Otu1412 | 0       | 11      | 0       | 0        | 2       | 2        | 1         | 5         | 0         | 0         | 3         | 0         | Bacteria; Proteobacteria; Gammaproteobacteria                                              |
| Otu2662 | 0       | 0       | 0       | 0        | 0       | 0        | 0         | 0         | 0         | 2         | 0         | 0         | Bacteria; TM7; SC3                                                                         |
| Otu4036 | 1       | 1       | 0       | 0        | 0       | 0        | 0         | 0         | 0         | 4         | 0         | 0         | Bacteria; Proteobacteria; Alphaproteobacteria; Rhodospirillales; Rhodospirillaceae         |

| #OTU ID | Z31DRh1 | Z31DRh2 | Z31DRh3 | Z31DRh4r | Z31DRh5 | Z31DRh6r | Z31J1DRh1 | Z31J1DRh2 | Z31J1DRh3 | Z31J1DRh4 | Z31J1DRh5 | Z31J1DRh6 | taxonomy                                                                                       |
|---------|---------|---------|---------|----------|---------|----------|-----------|-----------|-----------|-----------|-----------|-----------|------------------------------------------------------------------------------------------------|
| Otu3729 | 0       | 0       | 1       | 0        | 0       | 1        | 1         | 5         | 0         | 0         | 4         | 0         | Bacteria; Proteobacteria; Deltaproteobacteria; Myxococcales                                    |
| Otu2930 | 0       | 0       | 3       | 4        | 0       | 1        | 0         | 1         | 0         | 3         | 0         | 1         | Bacteria; Proteobacteria; Gammaproteobacteria; Legionellales; Coxiellaceae                     |
| Otu3728 | 0       | 0       | 0       | 0        | 0       | 0        | 0         | 0         | 0         | 0         | 2         | 0         | Bacteria; BRC1; PRR-11                                                                         |
| Otu2191 | 0       | 0       | 0       | 0        | 0       | 0        | 0         | 0         | 0         | 0         | 4         | 0         | Bacteria; OD1; ZB2                                                                             |
| Otu2190 | 1       | 0       | 0       | 0        | 0       | 3        | 0         | 0         | 0         | 0         | 0         | 0         | Bacteria; Proteobacteria; Alphaproteobacteria; Rickettsiales; mitochondria                     |
| Otu2193 | 0       | 3       | 0       | 2        | 0       | 0        | 0         | 0         | 3         | 0         | 1         | 0         | Bacteria                                                                                       |
| Otu2192 | 2       | 0       | 1       | 8        | 1       | 1        | 1         | 2         | 0         | 1         | 0         | 0         | Bacteria; Bacteroidetes; Saprospirae; Saprospirales; Chitinophagaceae                          |
| Otu2195 | 0       | 0       | 0       | 2        | 1       | 0        | 0         | 0         | 1         | 3         | 0         | 0         | Bacteria; OD1; ZB2                                                                             |
| Otu2194 | 0       | 3       | 0       | 0        | 0       | 0        | 0         | 0         | 0         | 0         | 0         | 0         | Bacteria; Proteobacteria; Deltaproteobacteria; Myxococcales; Haliangiaceae                     |
| Otu2197 | 0       | 2       | 0       | 3        | 0       | 0        | 0         | 0         | 0         | 0         | 0         | 0         | Bacteria; Nitrospirae; Nitrospira; Nitrospirales; 0319-6A21                                    |
| Otu2196 | 0       | 3       | 1       | 3        | 3       | 4        | 1         | 2         | 4         | 2         | 2         | 2         | Bacteria; Actinobacteria; Thermoleophilia; Solirubrobacteriales; Conexibacteraceae             |
| Otu2199 | 0       | 0       | 4       | 0        | 0       | 0        | 0         | 0         | 0         | 0         | 0         | 0         | Bacteria; Proteobacteria; Alphaproteobacteria; Rickettsiales; mitochondria                     |
| Otu2198 | 33      | 17      | 8       | 319      | 43      | 154      | 4         | 28        | 293       | 0         | 0         | 0         | Bacteria; Bacteroidetes; Saprospirae; Saprospirales; Chitinophagaceae; Chitinophaga            |
| Otu4118 | 0       | 1       | 0       | 0        | 0       | 0        | 0         | 0         | 0         | 2         | 0         | 0         | Bacteria; Chlamydiae; Chlamydia; Chlamydiales; Rhabdochlamydiaceae; Candidatus_Rhabdochlamydia |
| Otu3859 | 0       | 0       | 0       | 0        | 2       | 0        | 0         | 0         | 0         | 0         | 0         | 0         | Bacteria; Proteobacteria                                                                       |
| Otu4403 | 0       | 0       | 2       | 0        | 0       | 0        | 0         | 0         | 0         | 0         | 0         | 0         | Bacteria                                                                                       |
| Otu2009 | 0       | 0       | 1       | 0        | 3       | 0        | 4         | 2         | 1         | 4         | 1         | 2         | Bacteria; Gemmatimonadetes; Gemm-5                                                             |
| Otu4402 | 13      | 46      | 12      | 21       | 31      | 13       | 22        | 10        | 4         | 13        | 43        | 4         | Bacteria; Acidobacteria; Chloracidobacteria; RB41                                              |
| Otu4405 | 0       | 0       | 0       | 0        | 0       | 4        | 0         | 0         | 0         | 0         | 0         | 0         | Bacteria; Proteobacteria; Alphaproteobacteria; Rhizobiales; Hyphomicrobiaceae                  |
| Otu4404 | 0       | 0       | 0       | 0        | 0       | 0        | 0         | 0         | 0         | 0         | 0         | 2         | Bacteria; Planctomycetes; Planctomycetia; Gemmatales; Gemmataceae                              |
| Otu2938 | 2       | 3       | 4       | 2        | 2       | 0        | 1         | 2         | 1         | 2         | 0         | 0         | Bacteria; Acidobacteria; Acidobacteria-6; CCU21                                                |
| Otu1569 | 1       | 0       | 1       | 2        | 1       | 3        | 2         | 3         | 6         | 1         | 3         | 1         | Bacteria; Armatimonadetes; Chthonomonadetes; Chthonomonadales                                  |

| #OTU ID | Z31DRh1 | Z31DRh2 | Z31DRh3 | Z31DRh4r | Z31DRh5 | Z31DRh6r | Z31J1DRh1 | Z31J1DRh2 | Z31J1DRh3 | Z31J1DRh4 | Z31J1DRh5 | Z31J1DRh6 | taxonomy                                                                                                                        |
|---------|---------|---------|---------|----------|---------|----------|-----------|-----------|-----------|-----------|-----------|-----------|---------------------------------------------------------------------------------------------------------------------------------|
| Otu1568 | 2       | 0       | 3       | 5        | 3       | 10       | 0         | 1         | 1         | 3         | 2         | 3         | Bacteria; Planctomycetes; Planctomycetia; Gemmatales; Gemmataceae; Gemmata                                                      |
| Otu38   | 164     | 215     | 203     | 895      | 252     | 840      | 669       | 845       | 516       | 192       | 492       | 163       | Bacteria; Acidobacteria; Acidobacteriia; Acidobacteriales; Koribacteraceae; Candidatus_Koribacter                               |
| Otu39   | 194     | 137     | 204     | 350      | 143     | 713      | 213       | 188       | 235       | 115       | 87        | 230       | Bacteria; Proteobacteria; Gammaproteobacteria; Xanthomonadales; Xanthomonadaceae                                                |
| Otu36   | 118     | 156     | 208     | 276      | 482     | 692      | 208       | 99        | 137       | 225       | 175       | 240       | Bacteria; Proteobacteria; Betaproteobacteria; Burkholderiales; Oxalobacteraceae                                                 |
| Otu37   | 217     | 391     | 200     | 443      | 466     | 810      | 471       | 707       | 496       | 586       | 533       | 192       | Bacteria; Acidobacteria; Acidobacteriia; Acidobacteriales; Koribacteraceae                                                      |
| Otu34   | 215     | 172     | 331     | 412      | 286     | 867      | 474       | 352       | 535       | 596       | 237       | 513       | Bacteria; Proteobacteria; Betaproteobacteria; Burkholderiales; Burkholderiaceae; Burkholderia                                   |
| Otu35   | 11      | 0       | 1       | 7        | 503     | 0        | 0         | 0         | 2         | 0         | 1         | 0         | Bacteria; Bacteroidetes; Saprospirae; Saprospirales; Chitinophagaceae; Filimonas; Filimonas_lacunae                             |
| Otu32   | 79      | 2       | 1       | 518      | 335     | 38       | 0         | 13        | 16        | 4         | 7         | 152       | Bacteria; Verrucomicrobia; Verrucomicrobiae; Verrucomicrobiales; Verrucomicrobiaceae; Prosthecobacter; Prosthecobacter_debontii |
| Otu33   | 48      | 15      | 12      | 16       | 7       | 554      | 14        | 5         | 8         | 11        | 14        | 11        | Bacteria; Proteobacteria; Gammaproteobacteria; Xanthomonadales; Xanthomonadaceae; Dokdonella                                    |
| Otu30   | 329     | 668     | 290     | 621      | 525     | 1156     | 325       | 777       | 1126      | 570       | 998       | 467       | Bacteria; Bacteroidetes; Cytophagia; Cytophagales; Cytophagaceae                                                                |
| Otu31   | 68      | 34      | 12      | 9        | 25      | 587      | 32        | 12        | 30        | 11        | 9         | 284       | Bacteria; Proteobacteria; Gammaproteobacteria; Xanthomonadales; Xanthomonadaceae; Dokdonella                                    |
| Otu2999 | 0       | 0       | 2       | 0        | 0       | 0        | 0         | 0         | 0         | 0         | 0         | 0         | Bacteria                                                                                                                        |
| Otu2998 | 15      | 16      | 8       | 25       | 7       | 36       | 16        | 22        | 23        | 22        | 17        | 22        | Bacteria; Proteobacteria; Alphaproteobacteria; Sphingomonadales; Sphingomonadaceae; Sphingomonas; Sphingomonas_wittichii        |
| Otu4271 | 1       | 0       | 2       | 2        | 0       | 0        | 2         | 0         | 0         | 0         | 0         | 0         | Bacteria; Proteobacteria                                                                                                        |
| Otu2991 | 0       | 0       | 0       | 0        | 0       | 0        | 0         | 0         | 0         | 0         | 3         | 0         | Bacteria; Proteobacteria                                                                                                        |
| Otu2990 | 0       | 2       | 1       | 0        | 1       | 0        | 0         | 0         | 0         | 0         | 0         | 0         | Bacteria; Verrucomicrobia; Spartobacteria; Chthoniobacteriales; Chthoniobacteraceae                                             |
| Otu2993 | 0       | 0       | 0       | 0        | 0       | 1        | 2         | 1         | 0         | 0         | 0         | 0         | Bacteria; Proteobacteria; Alphaproteobacteria; Rickettsiales; mitochondria; Vermamoeba; Vermamoeba_vermiformis                  |
| Otu2992 | 0       | 0       | 0       | 0        | 0       | 0        | 0         | 0         | 2         | 0         | 2         | 0         | Bacteria; Chlamydiae; Chlamydia; Chlamydiales                                                                                   |
| Otu2995 | 2       | 1       | 1       | 2        | 1       | 0        | 0         | 3         | 0         | 2         | 0         | 1         | Bacteria; Bacteroidetes; Sphingobacteriia; Sphingobacteriales                                                                   |
| Otu2994 | 0       | 0       | 0       | 1        | 0       | 3        | 1         | 2         | 2         | 2         | 0         | 0         | Bacteria                                                                                                                        |
| Otu2997 | 3       | 8       | 0       | 2        | 0       | 2        | 0         | 1         | 3         | 1         | 1         | 0         | Bacteria; Proteobacteria; Gammaproteobacteria; Xanthomonadales; Xanthomonadaceae; Lysobacter                                    |
| Otu2996 | 0       | 0       | 0       | 2        | 0       | 0        | 0         | 0         | 0         | 0         | 0         | 0         | Bacteria; Proteobacteria; Betaproteobacteria                                                                                    |

| #OTU ID | Z31DRh1 | Z31DRh2 | Z31DRh3 | Z31DRh4r | Z31DRh5 | Z31DRh6r | Z31J1DRh1 | Z31J1DRh2 | Z31J1DRh3 | Z31J1DRh4 | Z31J1DRh5 | Z31J1DRh6 | taxonomy                                                                                            |
|---------|---------|---------|---------|----------|---------|----------|-----------|-----------|-----------|-----------|-----------|-----------|-----------------------------------------------------------------------------------------------------|
| Otu3558 | 0       | 3       | 0       | 0        | 0       | 0        | 0         | 0         | 0         | 0         | 0         | 0         | Bacteria; Verrucomicrobia; Pedosphaerae; Pedosphaerales; Ellin517                                   |
| Otu3559 | 0       | 2       | 0       | 2        | 0       | 0        | 0         | 1         | 0         | 0         | 0         | 1         | Bacteria; Actinobacteria; Actinobacteria; Actinomycetales; Nocardiaceae; Nocardia; Nocardia_concava |
| Otu3552 | 0       | 4       | 0       | 1        | 0       | 3        | 4         | 0         | 0         | 0         | 5         | 0         | Bacteria; Proteobacteria; Betaproteobacteria; MND1                                                  |
| Otu3553 | 0       | 2       | 0       | 1        | 0       | 0        | 0         | 0         | 0         | 2         | 0         | 0         | Bacteria; Proteobacteria; Gammaproteobacteria; Legionellales                                        |
| Otu3550 | 0       | 2       | 0       | 0        | 1       | 0        | 2         | 1         | 0         | 0         | 1         | 2         | Bacteria; Proteobacteria; Alphaproteobacteria; Rhodospirillales                                     |
| Otu3551 | 0       | 0       | 0       | 2        | 0       | 0        | 0         | 0         | 0         | 0         | 0         | 0         | Bacteria; Proteobacteria; Deltaproteobacteria; Bdellovibrionales; Bdellovibrionaceae; Bdellovibrio  |
| Otu3557 | 2       | 1       | 0       | 2        | 1       | 1        | 0         | 0         | 0         | 1         | 0         | 0         | Bacteria; TM7; SC3                                                                                  |
| Otu3554 | 0       | 0       | 0       | 3        | 0       | 0        | 0         | 0         | 0         | 0         | 1         | 0         | Bacteria; Acidobacteria                                                                             |
| Otu3555 | 1       | 1       | 2       | 1        | 0       | 5        | 1         | 4         | 0         | 1         | 0         | 2         | Bacteria; Planctomycetes; Planctomycetia; Gemmatales; Gemmataceae                                   |
| Otu4078 | 0       | 2       | 0       | 0        | 1       | 0        | 0         | 0         | 0         | 0         | 1         | 1         | Bacteria; OD1; ZB2                                                                                  |
| Otu4079 | 0       | 0       | 0       | 0        | 1       | 1        | 2         | 0         | 0         | 1         | 0         | 0         | Bacteria; OD1; SM2F11                                                                               |
| Otu4074 | 0       | 0       | 2       | 0        | 0       | 2        | 2         | 0         | 0         | 0         | 1         | 0         | Bacteria; Actinobacteria; Thermoleophilia; Solirubrobacterales                                      |
| Otu4075 | 0       | 0       | 0       | 2        | 0       | 0        | 0         | 0         | 0         | 0         | 0         | 0         | Bacteria                                                                                            |
| Otu4076 | 0       | 3       | 0       | 1        | 0       | 0        | 0         | 0         | 0         | 2         | 2         | 0         | Bacteria; Proteobacteria; Deltaproteobacteria; Myxococcales                                         |
| Otu3825 | 0       | 1       | 0       | 2        | 0       | 0        | 0         | 0         | 1         | 0         | 2         | 0         | Bacteria; Bacteroidetes; Sphingobacteria; Sphingobacteriales                                        |
| Otu4070 | 0       | 1       | 2       | 7        | 6       | 10       | 5         | 5         | 2         | 7         | 5         | 0         | Bacteria; Elusimicrobia; Elusimicrobia; IIb                                                         |
| Otu4071 | 0       | 2       | 0       | 0        | 0       | 0        | 0         | 0         | 0         | 0         | 0         | 0         | Bacteria; Proteobacteria; Deltaproteobacteria; Myxococcales; Haliangiaceae                          |
| Otu4072 | 0       | 0       | 2       | 0        | 0       | 0        | 0         | 0         | 0         | 0         | 0         | 0         | Bacteria; Armatimonadetes; Chthonomonadetes; Chthonomonadales; Chthonomonadaceae                    |
| Otu4073 | 0       | 0       | 0       | 0        | 0       | 0        | 0         | 0         | 0         | 0         | 0         | 2         | Bacteria; Proteobacteria                                                                            |
| Otu3251 | 0       | 0       | 0       | 1        | 0       | 0        | 2         | 0         | 0         | 0         | 1         | 0         | Bacteria; OD1; ZB2                                                                                  |
| Otu2865 | 1       | 0       | 0       | 2        | 1       | 3        | 1         | 0         | 0         | 1         | 2         | 0         | Bacteria; Firmicutes; Clostridia; OPB54                                                             |
| Otu2864 | 0       | 1       | 0       | 1        | 2       | 2        | 1         | 0         | 0         | 0         | 3         | 0         | Bacteria; Acidobacteria; Holophagae; Holophagales; Holophagaceae                                    |

| #OTU ID | Z31DRh1 | Z31DRh2 | Z31DRh3 | Z31DRh4r | Z31DRh5 | Z31DRh6r | Z31J1DRh1 | Z31J1DRh2 | Z31J1DRh3 | Z31J1DRh4 | Z31J1DRh5 | Z31J1DRh6 | taxonomy                                                                                           |
|---------|---------|---------|---------|----------|---------|----------|-----------|-----------|-----------|-----------|-----------|-----------|----------------------------------------------------------------------------------------------------|
| Otu2867 | 31      | 55      | 36      | 40       | 64      | 54       | 87        | 28        | 24        | 47        | 58        | 27        | Bacteria; Acidobacteria; Acidobacteria-6; iii1-15                                                  |
| Otu2866 | 1       | 2       | 0       | 7        | 2       | 3        | 0         | 2         | 2         | 1         | 3         | 0         | Bacteria; Elusimicrobia; Elusimicrobia; IIb                                                        |
| Otu2861 | 3       | 7       | 4       | 3        | 2       | 2        | 5         | 2         | 4         | 0         | 5         | 1         | Bacteria; Chloroflexi; TK10; B07_WMSP1                                                             |
| Otu2860 | 2       | 1       | 4       | 10       | 2       | 17       | 0         | 0         | 0         | 1         | 0         | 0         | Bacteria; Proteobacteria; Alphaproteobacteria; Sphingomonadales; Sphingomonadaceae; Sphingomonas   |
| Otu2863 | 0       | 0       | 0       | 0        | 0       | 0        | 0         | 0         | 0         | 0         | 2         | 0         | Bacteria; Proteobacteria; Deltaproteobacteria; Bdellovibrionales; Bdellovibrionaceae; Bdellovibrio |
| Otu2862 | 0       | 0       | 0       | 0        | 0       | 1        | 0         | 0         | 0         | 3         | 0         | 0         | Bacteria; Bacteroidetes; Sphingobacteriia; Sphingobacteriales                                      |
| Otu1103 | 16      | 41      | 20      | 20       | 24      | 53       | 22        | 25        | 11        | 19        | 10        | 7         | Bacteria; Verrucomicrobia; Opitutae; Opitutales; Opitutaceae; Opitutus                             |
| Otu2869 | 8       | 13      | 5       | 13       | 7       | 16       | 7         | 8         | 7         | 7         | 14        | 11        | Bacteria; Actinobacteria; Actinobacteria; Actinomycetales; Micromonosporaceae                      |
| Otu2868 | 3       | 0       | 0       | 0        | 2       | 2        | 1         | 4         | 1         | 1         | 1         | 0         | Bacteria; Gemmatimonadetes; Gemm-5                                                                 |
| Otu1102 | 13      | 15      | 16      | 10       | 9       | 8        | 9         | 3         | 0         | 5         | 15        | 4         | Bacteria; Verrucomicrobia; Spartobacteria; Chthoniobacteriales; Chthoniobacteraceae; OR-59         |
| Otu2739 | 4       | 8       | 4       | 10       | 2       | 13       | 11        | 16        | 8         | 1         | 3         | 4         | Bacteria; Proteobacteria; Alphaproteobacteria                                                      |
| Otu1101 | 7       | 0       | 2       | 6        | 1       | 8        | 2         | 1         | 3         | 2         | 2         | 0         | Bacteria; Bacteroidetes; Sphingobacteriia; Sphingobacteriales                                      |
| Otu2216 | 1       | 1       | 2       | 1        | 1       | 4        | 0         | 0         | 0         | 0         | 2         | 0         | Bacteria                                                                                           |
| Otu2735 | 1       | 0       | 3       | 0        | 0       | 2        | 0         | 0         | 0         | 0         | 1         | 2         | Bacteria; Proteobacteria; Alphaproteobacteria; Rhizobiales; Bradyrhizobiaceae                      |
| Otu2734 | 0       | 0       | 0       | 0        | 0       | 0        | 0         | 2         | 0         | 0         | 0         | 0         | Bacteria; Proteobacteria; Gammaproteobacteria; Legionellales; Legionellaceae                       |
| Otu2737 | 0       | 1       | 1       | 0        | 1       | 0        | 0         | 0         | 0         | 0         | 0         | 2         | Bacteria; OP3; PBS-25                                                                              |
| Otu1100 | 0       | 0       | 1       | 8        | 4       | 5        | 0         | 1         | 0         | 1         | 2         | 0         | Bacteria; Chloroflexi; Ktedonobacteria                                                             |
| Otu2731 | 0       | 0       | 1       | 0        | 0       | 0        | 0         | 2         | 1         | 0         | 0         | 0         | Bacteria; TM6; SJA-4                                                                               |
| Otu2730 | 0       | 0       | 1       | 0        | 0       | 3        | 4         | 0         | 0         | 0         | 0         | 1         | Bacteria; Planctomycetes; Planctomycetia; Pirellulales; Pirellulaceae; A17                         |
| Otu2733 | 0       | 0       | 0       | 3        | 0       | 0        | 0         | 0         | 0         | 0         | 0         | 0         | Bacteria; Cyanobacteria; 4C0d-2; MLE1-12                                                           |
| Otu2732 | 0       | 0       | 0       | 0        | 0       | 0        | 2         | 0         | 0         | 0         | 0         | 0         | Bacteria                                                                                           |
| Otu426  | 7       | 1       | 0       | 0        | 1       | 36       | 0         | 0         | 0         | 0         | 1         | 0         | Bacteria; Cyanobacteria; Synechococcophycideae; Pseudanabaenales; Pseudanabaenaceae                |

| #OTU ID | Z31DRh1 | Z31DRh2 | Z31DRh3 | Z31DRh4r | Z31DRh5 | Z31DRh6r | Z31J1DRh1 | Z31J1DRh2 | Z31J1DRh3 | Z31J1DRh4 | Z31J1DRh5 | Z31J1DRh6 | taxonomy                                                                                     |
|---------|---------|---------|---------|----------|---------|----------|-----------|-----------|-----------|-----------|-----------|-----------|----------------------------------------------------------------------------------------------|
| Otu3858 | 0       | 1       | 0       | 0        | 0       | 4        | 0         | 0         | 1         | 0         | 0         | 0         | Bacteria; Planctomycetes; Planctomycetia; Gemmatales; Isosphaeraeae                          |
| Otu427  | 13      | 8       | 15      | 19       | 14      | 55       | 14        | 22        | 30        | 12        | 37        | 16        | Bacteria; Planctomycetes; Phycisphaerae; WD2101                                              |
| Otu4411 | 0       | 0       | 0       | 1        | 1       | 3        | 0         | 0         | 0         | 1         | 0         | 0         | Bacteria; TM7                                                                                |
| Otu424  | 10      | 7       | 2       | 1        | 10      | 24       | 24        | 13        | 8         | 12        | 35        | 8         | Bacteria; Proteobacteria; Gammaproteobacteria                                                |
| Otu3488 | 1       | 1       | 3       | 2        | 1       | 3        | 1         | 2         | 0         | 0         | 0         | 0         | Bacteria; Armatimonadetes; Fimbriimonadia; Fimbriimonadales; Fimbriimonadaceae; Fimbriimonas |
| Otu3489 | 0       | 0       | 0       | 0        | 0       | 0        | 0         | 1         | 1         | 1         | 3         | 1         | Bacteria; Bacteroidetes; Sphingobacteriai; Sphingobacteriales; Sphingobacteriaceae           |
| Otu425  | 16      | 6       | 8       | 20       | 25      | 105      | 8         | 67        | 21        | 3         | 21        | 10        | Bacteria; Verrucomicrobia; Pedosphaerae; Pedosphaerales; auto67_4W                           |
| Otu2217 | 0       | 0       | 0       | 0        | 4       | 0        | 0         | 4         | 0         | 1         | 0         | 0         | Bacteria; Proteobacteria; Betaproteobacteria; Procabacteriales; Procabacteriaceae            |
| Otu1189 | 11      | 2       | 4       | 4        | 5       | 13       | 3         | 2         | 7         | 3         | 7         | 0         | Bacteria; Verrucomicrobia; Pedosphaerae; Pedosphaerales                                      |
| Otu1188 | 0       | 2       | 0       | 3        | 0       | 5        | 10        | 2         | 3         | 8         | 0         | 0         | Bacteria; Proteobacteria; Alphaproteobacteria; BD7-3                                         |
| Otu1187 | 3       | 0       | 0       | 2        | 1       | 11       | 2         | 6         | 3         | 4         | 0         | 5         | Bacteria; Bacteroidetes; Sphingobacteriai; Sphingobacteriales; Sphingobacteriaceae           |
| Otu422  | 2       | 12      | 8       | 7        | 37      | 24       | 3         | 8         | 3         | 4         | 11        | 7         | Bacteria; Planctomycetes; OM190; CL500-15                                                    |
| Otu1185 | 4       | 14      | 4       | 0        | 7       | 3        | 0         | 4         | 2         | 0         | 4         | 0         | Bacteria; Bacteroidetes; Sphingobacteriai; Sphingobacteriales                                |
| Otu1184 | 19      | 22      | 4       | 13       | 25      | 29       | 16        | 20        | 11        | 21        | 54        | 2         | Bacteria; Bacteroidetes; Cytophagia; Cytophagales; Cytophagaceae                             |
| Otu1183 | 7       | 4       | 9       | 9        | 3       | 12       | 3         | 8         | 8         | 3         | 13        | 5         | Bacteria; Actinobacteria; Acidimicrobia; Acidimicrobiales                                    |
| Otu1182 | 1       | 0       | 0       | 0        | 0       | 0        | 0         | 0         | 0         | 0         | 0         | 10        | Bacteria; Bacteroidetes; Cytophagia; Cytophagales; Cytophagaceae; Dyadobacter                |
| Otu1181 | 13      | 5       | 5       | 9        | 7       | 4        | 6         | 5         | 6         | 15        | 5         | 1         | Bacteria; Acidobacteria; Chloracidobacteria                                                  |
| Otu423  | 20      | 51      | 8       | 24       | 37      | 29       | 19        | 23        | 27        | 12        | 37        | 16        | Bacteria; Actinobacteria; Actinobacteria; Actinomycetales; Micromonosporaceae                |
| Otu1341 | 1       | 2       | 1       | 10       | 0       | 1        | 4         | 0         | 2         | 0         | 0         | 0         | Bacteria; Proteobacteria; Deltaproteobacteria; MIZ46                                         |
| Otu1340 | 5       | 3       | 3       | 2        | 3       | 7        | 0         | 0         | 0         | 1         | 4         | 0         | Bacteria; Chloroflexi; Chloroflexi; Roseiflexales                                            |
| Otu1343 | 1       | 2       | 1       | 3        | 2       | 6        | 6         | 4         | 1         | 0         | 7         | 0         | Bacteria; Planctomycetes; Phycisphaerae; Phycisphaerales                                     |
| Otu1342 | 6       | 5       | 2       | 31       | 0       | 9        | 10        | 6         | 6         | 9         | 7         | 3         | Bacteria; Proteobacteria; Deltaproteobacteria; MIZ46                                         |

| #OTU ID | Z31DRh1 | Z31DRh2 | Z31DRh3 | Z31DRh4r | Z31DRh5 | Z31DRh6r | Z31J1DRh1 | Z31J1DRh2 | Z31J1DRh3 | Z31J1DRh4 | Z31J1DRh5 | Z31J1DRh6 | taxonomy                                                                               |
|---------|---------|---------|---------|----------|---------|----------|-----------|-----------|-----------|-----------|-----------|-----------|----------------------------------------------------------------------------------------|
| Otu1345 | 0       | 0       | 0       | 0        | 0       | 2        | 0         | 7         | 4         | 2         | 8         | 0         | Bacteria; Proteobacteria; Gammaproteobacteria; Legionellales                           |
| Otu352  | 12      | 24      | 17      | 53       | 8       | 32       | 14        | 47        | 10        | 20        | 8         | 18        | Bacteria; Bacteroidetes; Sphingobacteria; Sphingobacteriales                           |
| Otu1347 | 3       | 3       | 6       | 3        | 8       | 1        | 1         | 2         | 0         | 1         | 5         | 0         | Bacteria; Bacteroidetes; Saprospirae; Saprospirales; Chitinophagaceae                  |
| Otu1346 | 1       | 8       | 2       | 7        | 1       | 1        | 6         | 7         | 0         | 2         | 6         | 3         | Bacteria; Actinobacteria; Acidimicrobia; Acidimicrobiales; C111                        |
| Otu1349 | 0       | 0       | 1       | 1        | 2       | 6        | 1         | 2         | 5         | 7         | 5         | 2         | Bacteria; Verrucomicrobia; Pedosphaerae; Pedosphaerales; Ellin517                      |
| Otu1348 | 8       | 10      | 8       | 9        | 6       | 3        | 8         | 3         | 4         | 7         | 27        | 4         | Bacteria; Proteobacteria; Betaproteobacteria                                           |
| Otu421  | 35      | 54      | 20      | 38       | 41      | 70       | 14        | 16        | 20        | 38        | 42        | 36        | Bacteria; Bacteroidetes; Cytophagia; Cytophagales; Cytophagaceae                       |
| Otu2068 | 0       | 0       | 0       | 1        | 0       | 1        | 1         | 1         | 0         | 0         | 3         | 0         | Bacteria; Chloroflexi; Ktedonobacteria; JG30-KF-AS9                                    |
| Otu480  | 18      | 6       | 17      | 33       | 2       | 11       | 18        | 25        | 4         | 8         | 10        | 7         | Bacteria; Verrucomicrobia; Pedosphaerae; Pedosphaerales; Ellin517                      |
| Otu481  | 5       | 42      | 8       | 19       | 38      | 71       | 11        | 10        | 4         | 31        | 37        | 22        | Bacteria; Chloroflexi; Anaerolineae; SBR1031; oc28                                     |
| Otu482  | 86      | 74      | 94      | 127      | 32      | 45       | 73        | 76        | 45        | 174       | 112       | 65        | Bacteria; Gemmatimonadetes; Gemmatimonadetes; Gemmatimonadales; Ellin5301              |
| Otu483  | 2       | 23      | 6       | 14       | 23      | 20       | 18        | 45        | 22        | 7         | 21        | 3         | Bacteria; Acidobacteria; DA052; Ellin6513                                              |
| Otu484  | 8       | 4       | 12      | 5        | 4       | 20       | 10        | 7         | 40        | 4         | 6         | 16        | Bacteria; Bacteroidetes; Sphingobacteria; Sphingobacteriales                           |
| Otu485  | 10      | 12      | 14      | 23       | 32      | 32       | 23        | 28        | 24        | 7         | 22        | 7         | Bacteria; Proteobacteria; Deltaproteobacteria; Myxococcales                            |
| Otu486  | 4       | 0       | 1       | 2        | 2       | 39       | 0         | 9         | 13        | 0         | 0         | 0         | Bacteria; Proteobacteria; Alphaproteobacteria                                          |
| Otu487  | 11      | 3       | 9       | 12       | 15      | 16       | 18        | 10        | 18        | 37        | 14        | 5         | Bacteria; Bacteroidetes; Saprospirae; Saprospirales; Chitinophagaceae; Flavisolibacter |
| Otu488  | 10      | 2       | 0       | 0        | 3       | 38       | 0         | 0         | 1         | 0         | 0         | 0         | Bacteria; Cyanobacteria; Synechococcophycideae; Pseudanabaenales; Pseudanabaenaceae    |
| Otu489  | 2       | 2       | 18      | 32       | 3       | 18       | 1         | 8         | 13        | 5         | 2         | 2         | Bacteria; Verrucomicrobia; Spartobacteria; Chthoniobacteriales; Chthoniobacteraceae    |
| Otu334  | 16      | 10      | 17      | 28       | 11      | 11       | 19        | 60        | 65        | 28        | 19        | 17        | Bacteria; Proteobacteria; Gammaproteobacteria; Legionellales; Coxiellaceae             |
| Otu335  | 11      | 69      | 28      | 40       | 27      | 29       | 22        | 8         | 8         | 13        | 30        | 8         | Bacteria; Chloroflexi; Chloroflexi; Roseiflexales; Kouleothrixaceae                    |
| Otu332  | 14      | 71      | 12      | 20       | 5       | 5        | 19        | 7         | 3         | 5         | 19        | 5         | Bacteria; Proteobacteria; Gammaproteobacteria; Legionellales; Coxiellaceae; Aquicella  |
| Otu333  | 60      | 10      | 11      | 57       | 2       | 27       | 0         | 17        | 6         | 13        | 5         | 0         | Bacteria; Planctomycetes; Phycisphaerae; WD2101                                        |

| #OTU ID | Z31DRh1 | Z31DRh2 | Z31DRh3 | Z31DRh4r | Z31DRh5 | Z31DRh6r | Z31J1DRh1 | Z31J1DRh2 | Z31J1DRh3 | Z31J1DRh4 | Z31J1DRh5 | Z31J1DRh6 | taxonomy                                                                                                                            |
|---------|---------|---------|---------|----------|---------|----------|-----------|-----------|-----------|-----------|-----------|-----------|-------------------------------------------------------------------------------------------------------------------------------------|
| Otu330  | 0       | 0       | 0       | 0        | 0       | 7        | 2         | 0         | 61        | 1         | 6         | 18        | Bacteria; Bacteroidetes; Sphingobacteriia; Sphingobacteriales                                                                       |
| Otu331  | 11      | 4       | 15      | 50       | 0       | 31       | 4         | 19        | 4         | 52        | 0         | 0         | Bacteria; Bacteroidetes; Flavobacteriia; Flavobacteriales; Weeksellaceae; Elizabethkingia; Elizabethkingia_meningoseptica           |
| Otu2609 | 2       | 0       | 1       | 0        | 0       | 0        | 0         | 0         | 0         | 0         | 0         | 2         | Bacteria; Proteobacteria; Deltaproteobacteria; MIZ46                                                                                |
| Otu2608 | 0       | 0       | 0       | 0        | 0       | 0        | 2         | 1         | 0         | 0         | 0         | 0         | Bacteria; Actinobacteria; Thermoleophilia; Solirubrobacterales; Conexibacteraceae                                                   |
| Otu3730 | 0       | 0       | 0       | 0        | 0       | 2        | 0         | 0         | 0         | 0         | 0         | 0         | Bacteria; Proteobacteria; Alphaproteobacteria                                                                                       |
| Otu3731 | 0       | 0       | 0       | 2        | 0       | 0        | 0         | 0         | 0         | 0         | 0         | 0         | Bacteria; Acidobacteria; Acidobacteriia; Acidobacteriales; Koribacteraceae; Candidatus_Koribacter; Candidatus_Koribacter_versatilis |
| Otu3736 | 0       | 0       | 0       | 0        | 0       | 0        | 4         | 0         | 2         | 0         | 0         | 0         | Bacteria; Elusimicrobia; Elusimicrobia; Elusimicrobiales                                                                            |
| Otu3737 | 0       | 2       | 0       | 1        | 0       | 0        | 0         | 0         | 0         | 0         | 0         | 0         | Bacteria; TM6; SJA-4                                                                                                                |
| Otu3734 | 0       | 0       | 0       | 0        | 0       | 0        | 0         | 0         | 2         | 0         | 0         | 0         | Bacteria; Proteobacteria                                                                                                            |
| Otu3735 | 0       | 0       | 2       | 0        | 1       | 2        | 0         | 0         | 0         | 4         | 0         | 1         | Bacteria; Gemmatimonadetes; Gemmatimonadetes                                                                                        |
| Otu2601 | 3       | 1       | 1       | 3        | 1       | 8        | 1         | 7         | 2         | 2         | 2         | 0         | Bacteria; Planctomycetes; Planctomycetia; Gemmatales; Isosphaeraceae                                                                |
| Otu2600 | 0       | 0       | 0       | 1        | 3       | 0        | 0         | 0         | 0         | 0         | 2         | 0         | Bacteria; Proteobacteria                                                                                                            |
| Otu2603 | 4       | 0       | 0       | 2        | 3       | 1        | 0         | 0         | 1         | 0         | 0         | 0         | Bacteria; Proteobacteria; TA18; PHOS-HD29                                                                                           |
| Otu2602 | 0       | 1       | 3       | 1        | 0       | 3        | 0         | 0         | 0         | 1         | 1         | 1         | Bacteria; Firmicutes; Bacilli; Bacillales; Bacillaceae                                                                              |
| Otu2605 | 1       | 0       | 1       | 1        | 0       | 3        | 0         | 0         | 0         | 0         | 0         | 2         | Bacteria; Planctomycetes; Planctomycetia; Gemmatales; Gemmataceae                                                                   |
| Otu2067 | 1       | 2       | 1       | 3        | 2       | 0        | 8         | 6         | 0         | 2         | 0         | 2         | Bacteria; Proteobacteria; Gammaproteobacteria; Legionellales; Coxiellaceae                                                          |
| Otu2607 | 0       | 3       | 0       | 0        | 0       | 0        | 0         | 0         | 0         | 0         | 0         | 0         | Bacteria; Proteobacteria; Deltaproteobacteria; Myxococcales                                                                         |
| Otu2606 | 0       | 0       | 0       | 0        | 0       | 0        | 0         | 0         | 2         | 0         | 0         | 0         | Bacteria                                                                                                                            |
| Otu4294 | 0       | 0       | 0       | 2        | 0       | 0        | 0         | 0         | 0         | 0         | 0         | 0         | Bacteria                                                                                                                            |
| Otu4295 | 0       | 1       | 0       | 0        | 0       | 0        | 0         | 0         | 0         | 0         | 3         | 0         | Bacteria; Proteobacteria; Alphaproteobacteria; Rhodobacterales; Hyphomonadaceae                                                     |
| Otu4296 | 0       | 1       | 0       | 0        | 0       | 0        | 0         | 0         | 0         | 0         | 2         | 0         | Bacteria                                                                                                                            |
| Otu2066 | 1       | 0       | 1       | 0        | 0       | 3        | 0         | 0         | 0         | 0         | 1         | 1         | Bacteria; Proteobacteria                                                                                                            |



| #OTU ID | Z31DRh1 | Z31DRh2 | Z31DRh3 | Z31DRh4r | Z31DRh5 | Z31DRh6r | Z31J1DRh1 | Z31J1DRh2 | Z31J1DRh3 | Z31J1DRh4 | Z31J1DRh5 | Z31J1DRh6 | taxonomy                                                                                          |
|---------|---------|---------|---------|----------|---------|----------|-----------|-----------|-----------|-----------|-----------|-----------|---------------------------------------------------------------------------------------------------|
| Otu4290 | 0       | 0       | 0       | 0        | 2       | 3        | 0         | 0         | 0         | 0         | 0         | 0         | Bacteria; Chloroflexi; S085                                                                       |
| Otu4291 | 0       | 2       | 0       | 0        | 0       | 0        | 0         | 0         | 0         | 0         | 0         | 0         | Bacteria; Gemmatimonadetes; Gemmatimonadetes; N1423WL                                             |
| Otu4292 | 1       | 1       | 0       | 0        | 0       | 0        | 0         | 0         | 0         | 0         | 4         | 0         | Bacteria; Chloroflexi; TK17                                                                       |
| Otu4293 | 0       | 0       | 0       | 0        | 0       | 2        | 0         | 0         | 0         | 0         | 0         | 0         | Bacteria; Chloroflexi; Ktedonobacteria; Thermogemmatisporales; Thermogemmatisporaceae             |
| Otu4298 | 0       | 2       | 0       | 0        | 0       | 0        | 0         | 0         | 0         | 0         | 0         | 0         | Bacteria                                                                                          |
| Otu4299 | 0       | 0       | 0       | 0        | 0       | 0        | 0         | 0         | 2         | 0         | 1         | 0         | Bacteria; Chloroflexi; Chloroflexi; Roseiflexales                                                 |
| Otu3826 | 0       | 0       | 0       | 3        | 0       | 0        | 0         | 0         | 0         | 1         | 0         | 0         | Bacteria; Proteobacteria; Deltaproteobacteria; MIZ46                                              |
| Otu158  | 1       | 2       | 0       | 2        | 0       | 128      | 0         | 3         | 11        | 1         | 1         | 0         | Bacteria; Proteobacteria; Betaproteobacteria; Rhodocyclales; Rhodocyclaceae; Azospira             |
| Otu159  | 111     | 2       | 4       | 4        | 6       | 37       | 1         | 0         | 3         | 3         | 1         | 12        | Bacteria; Proteobacteria; Gammaproteobacteria; Xanthomonadales; Xanthomonadaceae                  |
| Otu3122 | 0       | 0       | 0       | 0        | 0       | 2        | 0         | 0         | 0         | 0         | 0         | 0         | Bacteria                                                                                          |
| Otu3827 | 0       | 0       | 1       | 0        | 2       | 3        | 0         | 1         | 0         | 1         | 2         | 3         | Bacteria; Acidobacteria; Holophagae; Holophagales; Holophagaceae; Geothrix                        |
| Otu152  | 19      | 26      | 116     | 95       | 7       | 29       | 29        | 18        | 41        | 11        | 8         | 40        | Bacteria; Actinobacteria; Actinobacteria; Actinomycetales; Nocardioideae                          |
| Otu153  | 62      | 167     | 77      | 173      | 54      | 249      | 144       | 145       | 135       | 123       | 147       | 34        | Bacteria; Acidobacteria; Solibacteres; Solibacterales                                             |
| Otu150  | 41      | 13      | 54      | 67       | 97      | 36       | 34        | 149       | 4         | 21        | 4         | 70        | Bacteria; Bacteroidetes; Cytophagia; Cytophagales; Cytophagaceae; Dyadobacter                     |
| Otu151  | 0       | 0       | 11      | 158      | 29      | 71       | 1         | 5         | 15        | 29        | 14        | 4         | Bacteria; Bacteroidetes; Saprospirae; Saprospirales; Chitinophagaceae; Chitinophaga               |
| Otu156  | 16      | 79      | 21      | 13       | 5       | 38       | 1         | 10        | 13        | 1         | 5         | 173       | Bacteria; Bacteroidetes; Flavobacteriia; Flavobacteriales; Flavobacteriaceae; Flavobacterium      |
| Otu157  | 2       | 0       | 0       | 0        | 1       | 111      | 0         | 0         | 0         | 1         | 0         | 0         | Bacteria; Cyanobacteria                                                                           |
| Otu154  | 32      | 28      | 27      | 61       | 35      | 120      | 37        | 64        | 56        | 52        | 28        | 61        | Bacteria; Chloroflexi; Ktedonobacteria; JG30-KF-AS9                                               |
| Otu155  | 54      | 28      | 99      | 191      | 117     | 137      | 52        | 70        | 36        | 40        | 8         | 129       | Bacteria; Proteobacteria; Alphaproteobacteria; Rhizobiales; Rhizobiaceae; Agrobacterium           |
| Otu938  | 15      | 44      | 7       | 4        | 5       | 4        | 5         | 3         | 7         | 1         | 6         | 1         | Bacteria; Bacteroidetes; Cytophagia; Cytophagales; Cytophagaceae                                  |
| Otu939  | 0       | 14      | 1       | 0        | 0       | 3        | 0         | 0         | 1         | 0         | 0         | 0         | Bacteria; Proteobacteria; Deltaproteobacteria; Myxococcales                                       |
| Otu2517 | 1       | 0       | 1       | 3        | 0       | 9        | 2         | 3         | 2         | 0         | 0         | 1         | Bacteria; Acidobacteria; Acidobacteriia; Acidobacteriales; Koribacteraceae; Candidatus_Koribacter |

| #OTU ID | Z31DRh1 | Z31DRh2 | Z31DRh3 | Z31DRh4r | Z31DRh5 | Z31DRh6r | Z31J1DRh1 | Z31J1DRh2 | Z31J1DRh3 | Z31J1DRh4 | Z31J1DRh5 | Z31J1DRh6 | taxonomy                                                                                         |
|---------|---------|---------|---------|----------|---------|----------|-----------|-----------|-----------|-----------|-----------|-----------|--------------------------------------------------------------------------------------------------|
| Otu2516 | 1       | 1       | 1       | 3        | 3       | 1        | 0         | 5         | 0         | 0         | 1         | 0         | Bacteria; Verrucomicrobia; Spartobacteria; Chthoniobacteriales; Chthoniobacteraceae              |
| Otu2511 | 0       | 0       | 0       | 0        | 3       | 1        | 0         | 0         | 0         | 0         | 0         | 0         | Bacteria; Verrucomicrobia; Verrucomicrobiae; Verrucomicrobiales; Verrucomicrobiaceae             |
| Otu2510 | 0       | 4       | 1       | 3        | 1       | 2        | 0         | 2         | 2         | 2         | 3         | 0         | Bacteria; Chloroflexi; Chloroflexi; Roseiflexales; Kouleothrixaceae                              |
| Otu2513 | 1       | 6       | 1       | 6        | 4       | 0        | 2         | 1         | 0         | 5         | 2         | 1         | Bacteria; Chloroflexi; TK10; B07_WMSP1                                                           |
| Otu2512 | 0       | 3       | 3       | 1        | 0       | 0        | 2         | 1         | 0         | 0         | 0         | 1         | Bacteria; Proteobacteria; Deltaproteobacteria                                                    |
| Otu930  | 3       | 8       | 0       | 3        | 2       | 18       | 5         | 3         | 2         | 0         | 0         | 0         | Bacteria; Actinobacteria; Actinobacteria; Actinomycetales; Nocardiaceae; Nocardia                |
| Otu931  | 16      | 8       | 9       | 28       | 2       | 22       | 6         | 6         | 11        | 4         | 9         | 1         | Bacteria; Proteobacteria; Alphaproteobacteria; Caulobacterales; Caulobacteraceae                 |
| Otu932  | 1       | 5       | 4       | 8        | 7       | 13       | 5         | 5         | 5         | 3         | 5         | 2         | Bacteria; Chloroflexi; Ktedonobacteria; JG30-KF-AS9                                              |
| Otu933  | 17      | 1       | 0       | 0        | 1       | 9        | 0         | 0         | 1         | 0         | 0         | 0         | Bacteria; Cyanobacteria; Chloroplast; Stramenopiles                                              |
| Otu934  | 7       | 2       | 0       | 6        | 16      | 4        | 2         | 8         | 6         | 2         | 1         | 3         | Bacteria; Verrucomicrobia; Verrucomicrobiae; Verrucomicrobiales; Verrucomicrobiaceae             |
| Otu935  | 1       | 9       | 0       | 4        | 16      | 8        | 5         | 5         | 2         | 3         | 10        | 2         | Bacteria; Verrucomicrobia; Pedosphaerae; Pedosphaerales; Ellin515                                |
| Otu936  | 2       | 5       | 8       | 14       | 7       | 36       | 6         | 12        | 3         | 10        | 3         | 7         | Bacteria; Bacteroidetes; Saprospirae; Saprospirales; Chitinophagaceae                            |
| Otu937  | 2       | 14      | 1       | 6        | 7       | 9        | 5         | 5         | 6         | 3         | 13        | 4         | Bacteria; Acidobacteria; Acidobacteria-6; iii1-15; RB40                                          |
| Otu2269 | 5       | 9       | 2       | 5        | 2       | 0        | 4         | 0         | 0         | 1         | 5         | 3         | Bacteria; Nitrospirae; Nitrospira; Nitrospirales; 0319-6A21                                      |
| Otu3028 | 2       | 0       | 0       | 2        | 2       | 2        | 0         | 0         | 0         | 0         | 0         | 0         | Bacteria; Acidobacteria; Chloracidobacteria                                                      |
| Otu3029 | 6       | 1       | 3       | 3        | 2       | 0        | 5         | 5         | 6         | 11        | 2         | 4         | Bacteria; Proteobacteria; Alphaproteobacteria; Sphingomonadales; Sphingomonadaceae; Kaistobacter |
| Otu3026 | 0       | 0       | 1       | 0        | 0       | 1        | 0         | 2         | 0         | 3         | 0         | 0         | Bacteria; Planctomycetes; Planctomycetia; Gemmatales; Gemmataceae                                |
| Otu3027 | 0       | 0       | 0       | 0        | 0       | 0        | 2         | 0         | 0         | 0         | 0         | 0         | Bacteria; Proteobacteria; Betaproteobacteria                                                     |
| Otu3024 | 0       | 0       | 0       | 1        | 0       | 0        | 0         | 0         | 2         | 0         | 0         | 0         | Bacteria; Proteobacteria; Gammaproteobacteria                                                    |
| Otu2268 | 0       | 0       | 0       | 18       | 0       | 0        | 0         | 0         | 0         | 0         | 0         | 0         | Bacteria; TM7; TM7-1                                                                             |
| Otu3022 | 0       | 2       | 0       | 1        | 0       | 2        | 2         | 3         | 1         | 0         | 1         | 3         | Bacteria; Actinobacteria; Actinobacteria; Actinomycetales                                        |
| Otu3023 | 10      | 28      | 8       | 64       | 14      | 9        | 28        | 2         | 1         | 8         | 13        | 3         | Bacteria; Acidobacteria; Chloracidobacteria; 11-24                                               |

| #OTU ID | Z31DRh1 | Z31DRh2 | Z31DRh3 | Z31DRh4r | Z31DRh5 | Z31DRh6r | Z31J1DRh1 | Z31J1DRh2 | Z31J1DRh3 | Z31J1DRh4 | Z31J1DRh5 | Z31J1DRh6 | taxonomy                                                                                             |
|---------|---------|---------|---------|----------|---------|----------|-----------|-----------|-----------|-----------|-----------|-----------|------------------------------------------------------------------------------------------------------|
| Otu3020 | 0       | 0       | 0       | 0        | 0       | 0        | 0         | 2         | 0         | 0         | 0         | 0         | Bacteria; TM7; TM7-1                                                                                 |
| Otu3021 | 0       | 4       | 0       | 5        | 1       | 3        | 3         | 7         | 2         | 3         | 1         | 0         | Bacteria; Proteobacteria; Betaproteobacteria; SC-I-84                                                |
| Otu3985 | 3       | 0       | 0       | 0        | 0       | 0        | 0         | 1         | 0         | 0         | 0         | 0         | Bacteria; Proteobacteria; Alphaproteobacteria; Caulobacteriales; Caulobacteraceae                    |
| Otu3984 | 0       | 1       | 0       | 0        | 0       | 1        | 2         | 0         | 0         | 0         | 0         | 0         | Bacteria; Proteobacteria; Deltaproteobacteria; MIZ46                                                 |
| Otu2616 | 0       | 0       | 0       | 1        | 0       | 2        | 0         | 0         | 0         | 0         | 0         | 0         | Bacteria                                                                                             |
| Otu3987 | 47      | 24      | 114     | 81       | 23      | 40       | 49        | 64        | 61        | 38        | 41        | 41        | Bacteria; Proteobacteria; Alphaproteobacteria; Sphingomonadales; Sphingomonadaceae; Kaistobacter     |
| Otu4243 | 0       | 0       | 0       | 0        | 0       | 1        | 0         | 0         | 2         | 1         | 0         | 0         | Bacteria; Proteobacteria                                                                             |
| Otu3986 | 0       | 2       | 0       | 0        | 0       | 0        | 0         | 0         | 0         | 1         | 0         | 0         | Bacteria; Proteobacteria; Gammaproteobacteria                                                        |
| Otu1969 | 0       | 1       | 5       | 0        | 3       | 1        | 4         | 0         | 0         | 3         | 0         | 1         | Bacteria; Gemmatimonadetes; Gemmatimonadetes; Ellin5290                                              |
| Otu1968 | 4       | 0       | 1       | 5        | 0       | 0        | 1         | 0         | 0         | 0         | 4         | 0         | Bacteria; Proteobacteria; Deltaproteobacteria; Myxococcales                                          |
| Otu4315 | 0       | 4       | 1       | 2        | 0       | 3        | 0         | 0         | 0         | 0         | 1         | 0         | Bacteria; Bacteroidetes; Saprospirae; Saprospirales; Chitinophagaceae                                |
| Otu4242 | 5       | 1       | 2       | 3        | 1       | 2        | 1         | 0         | 1         | 0         | 0         | 1         | Bacteria; Proteobacteria; Betaproteobacteria; Burkholderiales; Oxalobacteraceae                      |
| Otu1965 | 0       | 0       | 0       | 0        | 0       | 0        | 0         | 3         | 0         | 0         | 0         | 0         | Bacteria; Planctomycetes; Planctomycetia; B97                                                        |
| Otu1964 | 0       | 3       | 0       | 0        | 0       | 0        | 0         | 0         | 0         | 0         | 0         | 0         | Bacteria; Chloroflexi; Anaerolineae; H39                                                             |
| Otu1967 | 0       | 0       | 0       | 0        | 3       | 3        | 0         | 0         | 0         | 0         | 1         | 0         | Bacteria; Elusimicrobia; Elusimicrobia; FAC88                                                        |
| Otu1966 | 0       | 4       | 3       | 0        | 1       | 0        | 1         | 0         | 0         | 0         | 2         | 0         | Bacteria; Planctomycetes; Phycisphaerae; Phycisphaerales                                             |
| Otu1961 | 1       | 0       | 3       | 7        | 2       | 1        | 2         | 2         | 3         | 4         | 1         | 1         | Bacteria; Proteobacteria; Gammaproteobacteria; Xanthomonadales; Sinobacteraceae                      |
| Otu1960 | 1       | 4       | 2       | 5        | 3       | 4        | 4         | 3         | 2         | 2         | 4         | 4         | Bacteria; Actinobacteria; Thermoleophilia; Gaiellales; Gaiellaceae                                   |
| Otu1963 | 0       | 3       | 0       | 0        | 1       | 0        | 1         | 0         | 0         | 0         | 0         | 2         | Bacteria; Proteobacteria; Deltaproteobacteria; Myxococcales                                          |
| Otu1962 | 3       | 6       | 1       | 3        | 2       | 2        | 4         | 2         | 1         | 3         | 4         | 1         | Bacteria; Actinobacteria; Thermoleophilia; Solirubrobacterales                                       |
| Otu804  | 11      | 3       | 15      | 27       | 6       | 9        | 4         | 1         | 6         | 1         | 12        | 8         | Bacteria; Proteobacteria; Alphaproteobacteria; Rickettsiales; mitochondria; Pythium; Pythium_ultimum |
| Otu805  | 18      | 11      | 2       | 7        | 7       | 13       | 26        | 20        | 20        | 30        | 5         | 14        | Bacteria; Gemmatimonadetes; Gemmatimonadetes; Ellin5290                                              |

| #OTU ID | Z31DRh1 | Z31DRh2 | Z31DRh3 | Z31DRh4r | Z31DRh5 | Z31DRh6r | Z31J1DRh1 | Z31J1DRh2 | Z31J1DRh3 | Z31J1DRh4 | Z31J1DRh5 | Z31J1DRh6 | taxonomy                                                                                                 |
|---------|---------|---------|---------|----------|---------|----------|-----------|-----------|-----------|-----------|-----------|-----------|----------------------------------------------------------------------------------------------------------|
| Otu806  | 1       | 3       | 2       | 2        | 6       | 19       | 18        | 25        | 14        | 7         | 5         | 6         | Bacteria; Acidobacteria; Acidobacteriia; Acidobacteriales; Koribacteraceae                               |
| Otu807  | 12      | 10      | 15      | 14       | 3       | 32       | 3         | 5         | 8         | 5         | 6         | 6         | Bacteria; Planctomycetes; Phycisphaerae; CPLA-3                                                          |
| Otu800  | 2       | 11      | 2       | 12       | 11      | 26       | 5         | 8         | 13        | 12        | 9         | 2         | Bacteria; Spirochaetes; Spirochaetes; Spirochaetales; Spirochaetaceae; Spirochaeta; Spirochaeta_aurantia |
| Otu801  | 0       | 0       | 0       | 36       | 0       | 1        | 0         | 0         | 0         | 0         | 5         | 5         | Bacteria; Bacteroidetes; Flavobacteriia; Flavobacteriales; Flavobacteriaceae; Flavobacterium             |
| Otu802  | 0       | 2       | 12      | 75       | 3       | 11       | 4         | 1         | 8         | 1         | 1         | 15        | Bacteria; Bacteroidetes; Sphingobacteriia; Sphingobacteriales; Sphingobacteriaceae                       |
| Otu803  | 3       | 6       | 4       | 2        | 9       | 3        | 0         | 13        | 13        | 0         | 11        | 3         | Bacteria; Planctomycetes; vadinHA49; DH61                                                                |
| Otu4034 | 5       | 5       | 7       | 3        | 1       | 2        | 2         | 1         | 2         | 5         | 2         | 3         | Bacteria; Proteobacteria; Alphaproteobacteria; Rhodospirillales; Rhodospirillaceae                       |
| Otu4247 | 3       | 2       | 2       | 2        | 1       | 3        | 0         | 1         | 2         | 0         | 0         | 4         | Bacteria; Actinobacteria; Actinobacteria; Actinomycetales; Nocardioideae; Pimelobacter                   |
| Otu3129 | 0       | 3       | 1       | 0        | 0       | 3        | 1         | 0         | 0         | 3         | 0         | 0         | Bacteria; Planctomycetes; Planctomycetia; Gemmatales; Gemmataceae; Gemmata                               |
| Otu3128 | 0       | 0       | 0       | 0        | 0       | 1        | 1         | 2         | 0         | 2         | 0         | 0         | Bacteria; Proteobacteria; Deltaproteobacteria; Bdellovibrionales; Bdellovibrionaceae; Bdellovibrio       |
| Otu808  | 16      | 13      | 1       | 5        | 0       | 4        | 1         | 1         | 2         | 0         | 1         | 1         | Bacteria; Proteobacteria; Deltaproteobacteria; Myxococcales                                              |
| Otu809  | 2       | 2       | 1       | 4        | 2       | 16       | 2         | 1         | 3         | 1         | 0         | 8         | Bacteria; Planctomycetes; Planctomycetia; Pirellulales; Pirellulaceae; Pirellula                         |
| Otu4246 | 0       | 1       | 0       | 1        | 1       | 0        | 2         | 1         | 1         | 1         | 0         | 0         | Bacteria; Proteobacteria                                                                                 |
| Otu2461 | 1       | 0       | 1       | 0        | 2       | 2        | 5         | 2         | 0         | 2         | 0         | 0         | Bacteria; Proteobacteria; Alphaproteobacteria                                                            |
| Otu2460 | 0       | 0       | 0       | 0        | 0       | 6        | 0         | 0         | 4         | 0         | 0         | 0         | Bacteria; Proteobacteria; Gammaproteobacteria; Legionellales; Coxiellaceae; Aquicella                    |
| Otu2463 | 1       | 0       | 3       | 0        | 0       | 0        | 0         | 0         | 0         | 0         | 0         | 0         | Bacteria; Acidobacteria; Solibacteres; Solibacterales                                                    |
| Otu2462 | 0       | 0       | 0       | 0        | 0       | 0        | 1         | 6         | 0         | 0         | 0         | 0         | Bacteria; Proteobacteria; Alphaproteobacteria; Rhizobiales; Bradyrhizobiaceae                            |
| Otu2465 | 1       | 1       | 0       | 0        | 1       | 6        | 4         | 2         | 1         | 1         | 2         | 0         | Bacteria; Planctomycetes; Planctomycetia; Gemmatales; Gemmataceae; Gemmata                               |
| Otu2464 | 1       | 0       | 0       | 1        | 0       | 4        | 0         | 1         | 0         | 2         | 0         | 0         | Bacteria; Armatimonadetes; 0319-6E2                                                                      |
| Otu2467 | 0       | 0       | 0       | 0        | 2       | 0        | 1         | 0         | 2         | 0         | 4         | 1         | Bacteria; OP3; PBS-25                                                                                    |
| Otu2466 | 2       | 0       | 0       | 2        | 3       | 7        | 1         | 2         | 1         | 0         | 1         | 0         | Bacteria; Elusimicrobia; Elusimicrobia; FAC88                                                            |
| Otu2469 | 0       | 3       | 3       | 1        | 0       | 0        | 2         | 2         | 1         | 2         | 5         | 0         | Bacteria; Nitrospirae; Nitrospira; Nitrospirales; Nitrospiraceae                                         |

| #OTU ID | Z31DRh1 | Z31DRh2 | Z31DRh3 | Z31DRh4r | Z31DRh5 | Z31DRh6r | Z31J1DRh1 | Z31J1DRh2 | Z31J1DRh3 | Z31J1DRh4 | Z31J1DRh5 | Z31J1DRh6 | taxonomy                                                                                            |
|---------|---------|---------|---------|----------|---------|----------|-----------|-----------|-----------|-----------|-----------|-----------|-----------------------------------------------------------------------------------------------------|
| Otu2468 | 2       | 1       | 1       | 2        | 0       | 1        | 2         | 3         | 0         | 3         | 0         | 0         | Bacteria; Proteobacteria; Alphaproteobacteria; Rhizobiales; Hyphomicrobiaceae; Parvibaculum         |
| Otu4244 | 7       | 22      | 9       | 9        | 3       | 22       | 9         | 6         | 7         | 11        | 19        | 7         | Bacteria; Actinobacteria; Thermoleophilia; Solirubrobacterales; Solirubrobacteraceae                |
| Otu3848 | 0       | 1       | 2       | 0        | 0       | 2        | 0         | 1         | 0         | 0         | 1         | 0         | Bacteria; Planctomycetes; Planctomycetia; Gemmatales; Gemmataceae                                   |
| Otu3133 | 0       | 0       | 0       | 0        | 2       | 0        | 0         | 0         | 0         | 0         | 0         | 0         | Bacteria; Armatimonadetes; 0319-6E2                                                                 |
| Otu3683 | 0       | 0       | 0       | 0        | 0       | 0        | 0         | 0         | 0         | 2         | 0         | 0         | Bacteria; Proteobacteria; Deltaproteobacteria                                                       |
| Otu4249 | 0       | 0       | 2       | 11       | 5       | 4        | 1         | 0         | 2         | 0         | 0         | 8         | Bacteria; Bacteroidetes; Saprospirae; Saprospirales; Chitinophagaceae                               |
| Otu1108 | 1       | 1       | 0       | 5        | 0       | 7        | 0         | 19        | 4         | 0         | 0         | 0         | Bacteria; Actinobacteria; Actinobacteria; Actinomycetales                                           |
| Otu3031 | 2       | 0       | 1       | 0        | 1       | 0        | 0         | 1         | 0         | 0         | 0         | 0         | Bacteria; Proteobacteria; Alphaproteobacteria; Rhodospirillales; Rhodospirillaceae                  |
| Otu4248 | 0       | 2       | 0       | 0        | 0       | 4        | 0         | 0         | 0         | 0         | 2         | 0         | Bacteria; OP3; PBS-25                                                                               |
| Otu3030 | 0       | 0       | 0       | 1        | 0       | 2        | 1         | 0         | 0         | 0         | 0         | 0         | Bacteria; TM7; TM7-1                                                                                |
| Otu3032 | 0       | 0       | 2       | 0        | 1       | 0        | 0         | 1         | 0         | 0         | 0         | 0         | Bacteria; Proteobacteria; Alphaproteobacteria; Caulobacterales; Caulobacteraceae; Phenyllobacterium |
| Otu3685 | 0       | 0       | 0       | 0        | 0       | 0        | 3         | 0         | 0         | 0         | 1         | 0         | Bacteria; Chloroflexi; Chloroflexi; AKIW781                                                         |
| Otu3828 | 0       | 2       | 0       | 0        | 0       | 1        | 0         | 0         | 0         | 0         | 1         | 0         | Bacteria; Planctomycetes; Planctomycetia; Gemmatales; Gemmataceae                                   |
| Otu3239 | 0       | 0       | 0       | 0        | 0       | 2        | 1         | 0         | 0         | 3         | 0         | 0         | Bacteria; Proteobacteria; Gammaproteobacteria                                                       |
| Otu3237 | 0       | 2       | 0       | 0        | 0       | 0        | 0         | 0         | 0         | 0         | 0         | 0         | Bacteria; Proteobacteria; Alphaproteobacteria; Sphingomonadales                                     |
| Otu3236 | 0       | 0       | 0       | 0        | 0       | 0        | 0         | 0         | 0         | 0         | 2         | 0         | Bacteria; Verrucomicrobia; Opitutae; Opitutales; Opitutaceae                                        |
| Otu3235 | 0       | 2       | 0       | 0        | 0       | 0        | 1         | 0         | 0         | 0         | 0         | 0         | Bacteria; OD1; SM2F11                                                                               |
| Otu3234 | 0       | 0       | 0       | 0        | 0       | 0        | 1         | 0         | 1         | 0         | 2         | 0         | Bacteria; Chlamydiae; Chlamydia; Chlamydiales; Parachlamydiaceae                                    |
| Otu3233 | 0       | 3       | 0       | 0        | 0       | 3        | 0         | 0         | 0         | 0         | 0         | 0         | Bacteria                                                                                            |
| Otu3232 | 0       | 0       | 1       | 3        | 0       | 3        | 3         | 1         | 1         | 0         | 0         | 0         | Bacteria; Proteobacteria; Gammaproteobacteria; Legionellales                                        |
| Otu3231 | 0       | 1       | 1       | 1        | 2       | 3        | 2         | 3         | 1         | 1         | 2         | 1         | Bacteria; Cyanobacteria; Chloroplast; Stramenopiles                                                 |
| Otu3230 | 0       | 0       | 0       | 0        | 0       | 1        | 0         | 1         | 1         | 0         | 2         | 2         | Bacteria; Proteobacteria                                                                            |

| #OTU ID | Z31DRh1 | Z31DRh2 | Z31DRh3 | Z31DRh4r | Z31DRh5 | Z31DRh6r | Z31J1DRh1 | Z31J1DRh2 | Z31J1DRh3 | Z31J1DRh4 | Z31J1DRh5 | Z31J1DRh6 | taxonomy                                                                                                             |
|---------|---------|---------|---------|----------|---------|----------|-----------|-----------|-----------|-----------|-----------|-----------|----------------------------------------------------------------------------------------------------------------------|
| Otu2612 | 0       | 1       | 8       | 8        | 2       | 5        | 4         | 6         | 7         | 6         | 6         | 1         | Bacteria; Proteobacteria; Gammaproteobacteria; Legionellales; Coxiellaceae; Aquicella                                |
| Otu3039 | 0       | 1       | 0       | 0        | 1       | 0        | 2         | 0         | 1         | 0         | 2         | 0         | Bacteria; Chloroflexi; Ellin6529                                                                                     |
| Otu2688 | 0       | 0       | 1       | 0        | 0       | 0        | 2         | 2         | 0         | 2         | 1         | 0         | Bacteria; Proteobacteria; Alphaproteobacteria; Rhodospirillales; Rhodospirillaceae                                   |
| Otu4328 | 0       | 0       | 3       | 0        | 0       | 0        | 0         | 0         | 0         | 0         | 0         | 0         | Bacteria; Chlamydiae; Chlamydia; Chlamydiales                                                                        |
| Otu3449 | 0       | 0       | 0       | 0        | 0       | 0        | 0         | 2         | 0         | 0         | 0         | 0         | Bacteria; Firmicutes; Clostridia; Clostridiales; Clostridiaceae; Clostridium                                         |
| Otu2523 | 3       | 1       | 0       | 3        | 0       | 2        | 2         | 0         | 4         | 0         | 2         | 0         | Bacteria; Bacteroidetes; Saprospirae; Saprospirales; Chitinophagaceae                                                |
| Otu2613 | 0       | 0       | 0       | 0        | 0       | 0        | 0         | 2         | 0         | 0         | 0         | 0         | Bacteria; Proteobacteria; Betaproteobacteria; Burkholderiales                                                        |
| Otu1745 | 0       | 1       | 0       | 1        | 0       | 0        | 4         | 3         | 0         | 2         | 2         | 0         | Bacteria; Proteobacteria; Alphaproteobacteria; Rickettsiales; mitochondria; Acanthamoeba; Acanthamoeba_palestinensis |
| Otu1744 | 0       | 4       | 0       | 0        | 0       | 0        | 1         | 3         | 0         | 0         | 1         | 0         | Bacteria; Chlamydiae; Chlamydia; Chlamydiales; Rhabdochlamydiaceae; Candidatus_Rhabdochlamydia                       |
| Otu1747 | 3       | 4       | 1       | 1        | 0       | 1        | 2         | 5         | 0         | 2         | 2         | 2         | Bacteria; Proteobacteria; Deltaproteobacteria; Entotheonellales; Entotheonellaceae                                   |
| Otu1746 | 1       | 3       | 0       | 0        | 0       | 0        | 0         | 0         | 0         | 1         | 6         | 0         | Bacteria; Proteobacteria; Deltaproteobacteria; Myxococcales                                                          |
| Otu1741 | 0       | 2       | 1       | 0        | 0       | 2        | 1         | 1         | 0         | 5         | 6         | 0         | Bacteria                                                                                                             |
| Otu1740 | 1       | 3       | 4       | 7        | 0       | 2        | 0         | 1         | 1         | 3         | 3         | 0         | Bacteria; Actinobacteria; Rubrobacteria; Rubrobacterales; Rubrobacteraceae; Rubrobacter                              |
| Otu1743 | 0       | 0       | 1       | 1        | 4       | 0        | 0         | 1         | 0         | 0         | 0         | 7         | Bacteria; Proteobacteria; Gammaproteobacteria; Xanthomonadales; Xanthomonadaceae; Lysobacter; Lysobacter_ximonensis  |
| Otu1742 | 8       | 0       | 1       | 1        | 0       | 7        | 1         | 0         | 1         | 2         | 0         | 0         | Bacteria; Planctomycetes; Planctomycetia; Gemmatales; Gemmataceae; Gemmata                                           |
| Otu2058 | 3       | 2       | 2       | 0        | 2       | 3        | 0         | 0         | 0         | 1         | 1         | 0         | Bacteria; Planctomycetes; Planctomycetia; Gemmatales; Gemmataceae; Gemmata                                           |
| Otu2059 | 1       | 0       | 0       | 4        | 0       | 2        | 1         | 1         | 0         | 0         | 2         | 0         | Bacteria; FBP                                                                                                        |
| Otu1749 | 1       | 0       | 0       | 0        | 6       | 0        | 0         | 1         | 3         | 0         | 0         | 0         | Bacteria; Proteobacteria; Gammaproteobacteria; Legionellales                                                         |
| Otu1748 | 0       | 2       | 0       | 2        | 0       | 0        | 1         | 2         | 0         | 6         | 2         | 1         | Bacteria; Proteobacteria; Alphaproteobacteria; Rhodospirillales; Rhodospirillaceae                                   |
| Otu1987 | 0       | 0       | 0       | 0        | 0       | 3        | 0         | 1         | 2         | 0         | 0         | 0         | Bacteria; AD3; ABS-6                                                                                                 |
| Otu1986 | 0       | 3       | 1       | 2        | 0       | 1        | 2         | 3         | 1         | 4         | 3         | 1         | Bacteria; Proteobacteria; Deltaproteobacteria; Myxococcales                                                          |
| Otu1985 | 1       | 4       | 1       | 0        | 2       | 7        | 2         | 3         | 7         | 1         | 4         | 3         | Bacteria; Elusimicrobia; Elusimicrobia; FAC88                                                                        |

| #OTU ID | Z31DRh1 | Z31DRh2 | Z31DRh3 | Z31DRh4r | Z31DRh5 | Z31DRh6r | Z31J1DRh1 | Z31J1DRh2 | Z31J1DRh3 | Z31J1DRh4 | Z31J1DRh5 | Z31J1DRh6 | taxonomy                                                                                   |
|---------|---------|---------|---------|----------|---------|----------|-----------|-----------|-----------|-----------|-----------|-----------|--------------------------------------------------------------------------------------------|
| Otu1984 | 0       | 0       | 2       | 0        | 6       | 4        | 4         | 3         | 2         | 3         | 0         | 2         | Bacteria; Actinobacteria; Actinobacteria; Actinomycetales                                  |
| Otu1983 | 0       | 3       | 1       | 6        | 0       | 1        | 1         | 0         | 0         | 0         | 0         | 0         | Bacteria; Proteobacteria; Alphaproteobacteria                                              |
| Otu1982 | 1       | 4       | 0       | 0        | 0       | 2        | 3         | 3         | 3         | 1         | 2         | 3         | Bacteria; Acidobacteria; TM1                                                               |
| Otu1981 | 0       | 1       | 2       | 3        | 0       | 1        | 0         | 5         | 0         | 0         | 1         | 0         | Bacteria; Proteobacteria; Alphaproteobacteria                                              |
| Otu1980 | 3       | 2       | 3       | 2        | 1       | 1        | 0         | 0         | 1         | 2         | 0         | 1         | Bacteria; Planctomycetes; Planctomycetia; Gemmatales; Gemmataceae                          |
| Otu2053 | 4       | 6       | 3       | 4        | 4       | 3        | 3         | 3         | 4         | 2         | 8         | 1         | Bacteria; Proteobacteria; Deltaproteobacteria                                              |
| Otu4089 | 0       | 0       | 0       | 2        | 0       | 0        | 0         | 0         | 0         | 0         | 0         | 0         | Bacteria; Proteobacteria; Alphaproteobacteria; Rickettsiales; Rickettsiaceae               |
| Otu2298 | 23      | 41      | 28      | 32       | 21      | 10       | 18        | 36        | 15        | 32        | 25        | 7         | Bacteria; Verrucomicrobia; Spartobacteria; Chthoniobacteriales; Chthoniobacteraceae; DA101 |
| Otu2299 | 0       | 2       | 0       | 1        | 1       | 1        | 0         | 2         | 4         | 3         | 0         | 1         | Bacteria; Chlamydiae; Chlamydia; Chlamydiales                                              |
| Otu1989 | 3       | 0       | 0       | 0        | 0       | 0        | 0         | 0         | 0         | 0         | 0         | 0         | Bacteria; Proteobacteria; Gammaproteobacteria                                              |
| Otu1988 | 6       | 0       | 1       | 4        | 1       | 5        | 1         | 3         | 0         | 1         | 2         | 0         | Bacteria; Planctomycetes; Planctomycetia; B97                                              |
| Otu3344 | 0       | 1       | 4       | 2        | 5       | 8        | 3         | 4         | 11        | 15        | 9         | 2         | Bacteria; Verrucomicrobia; Pedosphaerae; Pedosphaerales                                    |
| Otu3838 | 0       | 1       | 0       | 2        | 0       | 0        | 0         | 0         | 1         | 3         | 3         | 0         | Bacteria; Actinobacteria; Rubrobacteria; Rubrobacteriales; Rubrobacteraceae; Rubrobacter   |
| Otu215  | 11      | 10      | 33      | 77       | 13      | 3        | 1         | 14        | 89        | 1         | 7         | 5         | Bacteria; Bacteroidetes; Cytophagia; Cytophagales                                          |
| Otu4322 | 1       | 2       | 0       | 2        | 1       | 3        | 0         | 4         | 1         | 3         | 3         | 0         | Bacteria; Planctomycetes; vadinHA49; DH61                                                  |
| Otu3831 | 0       | 0       | 0       | 0        | 0       | 0        | 0         | 0         | 4         | 1         | 3         | 0         | Bacteria; Proteobacteria; Gammaproteobacteria; Legionellales; Coxiellaceae; Aquicella      |
| Otu3830 | 2       | 1       | 0       | 0        | 2       | 3        | 0         | 1         | 3         | 0         | 1         | 0         | Bacteria; Proteobacteria; Deltaproteobacteria; Myxococcales; Cystobacteraceae; Cystobacter |
| Otu3833 | 1       | 0       | 0       | 0        | 0       | 2        | 2         | 1         | 3         | 0         | 1         | 0         | Bacteria; Proteobacteria                                                                   |
| Otu3832 | 1       | 0       | 0       | 2        | 0       | 0        | 0         | 0         | 0         | 0         | 0         | 0         | Bacteria; Proteobacteria; Gammaproteobacteria                                              |
| Otu3835 | 0       | 2       | 0       | 0        | 0       | 0        | 0         | 0         | 0         | 0         | 0         | 0         | Bacteria; Chlamydiae; Chlamydia; Chlamydiales                                              |
| Otu3834 | 13      | 2       | 2       | 3        | 3       | 21       | 0         | 2         | 15        | 2         | 4         | 13        | Bacteria; Bacteroidetes; Saprospirae; Saprospirales; Chitinophagaceae; Sediminibacterium   |
| Otu3837 | 22      | 26      | 13      | 13       | 2       | 4        | 17        | 2         | 1         | 6         | 0         | 1         | Bacteria; Acidobacteria; Chloracidobacteria; RB41; Ellin6075                               |

| #OTU ID | Z31DRh1 | Z31DRh2 | Z31DRh3 | Z31DRh4r | Z31DRh5 | Z31DRh6r | Z31J1DRh1 | Z31J1DRh2 | Z31J1DRh3 | Z31J1DRh4 | Z31J1DRh5 | Z31J1DRh6 | taxonomy                                                                                                                  |
|---------|---------|---------|---------|----------|---------|----------|-----------|-----------|-----------|-----------|-----------|-----------|---------------------------------------------------------------------------------------------------------------------------|
| Otu3836 | 0       | 3       | 0       | 0        | 0       | 0        | 0         | 0         | 0         | 0         | 0         | 0         | Bacteria; Planctomycetes; Phycisphaerae; WD2101                                                                           |
| Otu2054 | 0       | 1       | 0       | 0        | 4       | 1        | 1         | 0         | 0         | 0         | 1         | 0         | Bacteria; WS3; PRR-12; Sediment-1                                                                                         |
| Otu2611 | 1       | 4       | 4       | 3        | 5       | 4        | 2         | 1         | 0         | 3         | 6         | 0         | Bacteria; Proteobacteria; Deltaproteobacteria; Myxococcales                                                               |
| Otu214  | 1       | 0       | 0       | 100      | 7       | 3        | 0         | 0         | 0         | 0         | 0         | 0         | Bacteria; Proteobacteria; Alphaproteobacteria; Rhodospirillales; Rhodospirillaceae; Azospirillum; Azospirillum_amazonense |
| Otu1408 | 1       | 0       | 0       | 1        | 0       | 0        | 2         | 5         | 0         | 0         | 0         | 0         | Bacteria; Proteobacteria                                                                                                  |
| Otu1409 | 1       | 0       | 1       | 0        | 1       | 1        | 5         | 5         | 1         | 1         | 1         | 0         | Bacteria                                                                                                                  |
| Otu1402 | 6       | 1       | 1       | 4        | 1       | 1        | 0         | 2         | 5         | 3         | 0         | 0         | Bacteria                                                                                                                  |
| Otu1403 | 12      | 10      | 12      | 18       | 6       | 33       | 9         | 13        | 16        | 8         | 10        | 17        | Bacteria; Actinobacteria; Actinobacteria; Actinomycetales; Mycobacteriaceae; Mycobacterium                                |
| Otu1400 | 1       | 14      | 1       | 8        | 5       | 9        | 4         | 1         | 2         | 1         | 0         | 1         | Bacteria; Chloroflexi; Anaerolineae; Anaerolineales; Anaerolinaceae; Anaerolinea                                          |
| Otu1401 | 1       | 1       | 5       | 6        | 2       | 3        | 2         | 0         | 0         | 3         | 1         | 0         | Bacteria                                                                                                                  |
| Otu1406 | 3       | 6       | 1       | 4        | 2       | 7        | 2         | 7         | 2         | 4         | 3         | 3         | Bacteria; Actinobacteria; Acidimicrobiia; Acidimicrobiales; EB1017                                                        |
| Otu1407 | 0       | 5       | 4       | 1        | 0       | 2        | 0         | 3         | 2         | 0         | 3         | 0         | Bacteria; Planctomycetes; Planctomycetia; Pirellulales; Pirellulaceae                                                     |
| Otu1404 | 1       | 1       | 0       | 5        | 1       | 7        | 0         | 0         | 0         | 0         | 1         | 0         | Bacteria; Planctomycetes; Phycisphaerae; WD2101                                                                           |
| Otu1405 | 0       | 0       | 0       | 0        | 0       | 0        | 0         | 0         | 8         | 0         | 0         | 0         | Bacteria                                                                                                                  |
| Otu3142 | 0       | 1       | 3       | 0        | 0       | 0        | 0         | 0         | 0         | 0         | 0         | 0         | Bacteria; Acidobacteria                                                                                                   |
| Otu1531 | 1       | 15      | 3       | 8        | 1       | 4        | 6         | 3         | 1         | 1         | 5         | 0         | Bacteria; Actinobacteria; Thermoleophilia; Gaiellales; Gaiellaceae                                                        |
| Otu4207 | 0       | 0       | 0       | 0        | 0       | 2        | 0         | 0         | 0         | 0         | 0         | 0         | Bacteria; Proteobacteria; Gammaproteobacteria; Legionellales; Coxiellaceae; Aquicella                                     |
| Otu3939 | 7       | 7       | 3       | 5        | 2       | 44       | 17        | 22        | 31        | 3         | 16        | 6         | Bacteria; Bacteroidetes; Cytophagia; Cytophagales; Cytophagaceae                                                          |
| Otu217  | 22      | 23      | 20      | 22       | 12      | 6        | 14        | 7         | 4         | 47        | 85        | 1         | Bacteria; Gemmatimonadetes; Gemm-3                                                                                        |
| Otu3905 | 0       | 0       | 2       | 2        | 0       | 0        | 5         | 7         | 3         | 6         | 3         | 0         | Bacteria; Gemmatimonadetes; Gemmatimonadetes                                                                              |
| Otu3904 | 0       | 0       | 0       | 2        | 0       | 0        | 0         | 0         | 0         | 0         | 0         | 0         | Bacteria; Proteobacteria; Deltaproteobacteria                                                                             |
| Otu3907 | 0       | 0       | 0       | 0        | 3       | 0        | 0         | 0         | 0         | 1         | 0         | 0         | Bacteria; Planctomycetes; Phycisphaerae; Phycisphaerales; Phycisphaeraceae                                                |



| #OTU ID | Z31DRh1 | Z31DRh2 | Z31DRh3 | Z31DRh4r | Z31DRh5 | Z31DRh6r | Z31J1DRh1 | Z31J1DRh2 | Z31J1DRh3 | Z31J1DRh4 | Z31J1DRh5 | Z31J1DRh6 | taxonomy                                                                                     |
|---------|---------|---------|---------|----------|---------|----------|-----------|-----------|-----------|-----------|-----------|-----------|----------------------------------------------------------------------------------------------|
| Otu3906 | 2       | 0       | 0       | 0        | 0       | 0        | 0         | 0         | 0         | 0         | 0         | 0         | Bacteria                                                                                     |
| Otu3901 | 4       | 9       | 5       | 7        | 6       | 4        | 4         | 4         | 2         | 7         | 13        | 2         | Bacteria; Proteobacteria; Betaproteobacteria; SC-I-84                                        |
| Otu3900 | 0       | 0       | 0       | 0        | 0       | 4        | 0         | 1         | 1         | 0         | 0         | 0         | Bacteria; Armatimonadetes; Fimbriimonadia; Fimbriimonadales; Fimbriimonadaceae; Fimbriimonas |
| Otu2188 | 0       | 3       | 0       | 0        | 0       | 0        | 2         | 2         | 0         | 1         | 1         | 0         | Bacteria; Chlamydiae; Chlamydia; Chlamydiales                                                |
| Otu2189 | 0       | 3       | 0       | 0        | 0       | 0        | 0         | 0         | 0         | 0         | 0         | 0         | Bacteria; Proteobacteria; Deltaproteobacteria                                                |
| Otu2186 | 54      | 26      | 46      | 118      | 23      | 83       | 26        | 26        | 47        | 39        | 20        | 79        | Bacteria; Proteobacteria; Betaproteobacteria; Burkholderiales; Comamonadaceae                |
| Otu2187 | 4       | 3       | 4       | 4        | 1       | 2        | 3         | 1         | 2         | 4         | 3         | 1         | Bacteria                                                                                     |
| Otu2184 | 2       | 2       | 7       | 6        | 0       | 5        | 9         | 6         | 4         | 2         | 1         | 4         | Bacteria; Proteobacteria; Alphaproteobacteria; Rhodospirillales; Rhodospirillaceae           |
| Otu2185 | 2       | 0       | 3       | 5        | 0       | 0        | 1         | 0         | 0         | 0         | 2         | 0         | Bacteria; Planctomycetes; Phycisphaerae; WD2101                                              |
| Otu2182 | 0       | 0       | 2       | 0        | 0       | 1        | 3         | 0         | 0         | 0         | 2         | 0         | Bacteria; Proteobacteria; Alphaproteobacteria; Rhizobiales; Rhodiaceae; Afifella             |
| Otu2183 | 0       | 1       | 0       | 7        | 0       | 2        | 0         | 0         | 1         | 0         | 0         | 0         | Bacteria; Bacteroidetes; Saprospirae; Saprospirales                                          |
| Otu2180 | 0       | 5       | 2       | 3        | 0       | 0        | 2         | 2         | 0         | 1         | 0         | 0         | Bacteria; Proteobacteria; Alphaproteobacteria; Ellin329                                      |
| Otu2181 | 2       | 4       | 1       | 3        | 3       | 1        | 0         | 2         | 2         | 2         | 1         | 2         | Bacteria; Proteobacteria; Deltaproteobacteria; Myxococcales                                  |
| Otu1536 | 0       | 0       | 0       | 0        | 3       | 0        | 6         | 0         | 0         | 0         | 1         | 0         | Bacteria; Chlamydiae; Chlamydia; Chlamydiales                                                |
| Otu3349 | 0       | 0       | 1       | 1        | 0       | 0        | 0         | 0         | 0         | 0         | 0         | 2         | Bacteria                                                                                     |
| Otu216  | 86      | 97      | 118     | 84       | 73      | 100      | 128       | 109       | 104       | 154       | 92        | 80        | Bacteria; Gemmatimonadetes; Gemmatimonadetes; Gemmatimonadales; Ellin5301                    |
| Otu1576 | 0       | 2       | 0       | 0        | 0       | 0        | 0         | 10        | 0         | 0         | 1         | 1         | Bacteria; Proteobacteria; Gammaproteobacteria; Legionellales; Coxiellaceae                   |
| Otu1577 | 1       | 0       | 3       | 5        | 4       | 5        | 4         | 7         | 4         | 12        | 2         | 2         | Bacteria; Proteobacteria; Deltaproteobacteria; Myxococcales                                  |
| Otu1574 | 0       | 2       | 0       | 0        | 1       | 4        | 1         | 0         | 0         | 0         | 7         | 0         | Bacteria; OD1; ZB2                                                                           |
| Otu1575 | 2       | 0       | 0       | 0        | 0       | 6        | 0         | 1         | 0         | 0         | 1         | 0         | Bacteria; Proteobacteria; Deltaproteobacteria; FAC87                                         |
| Otu1572 | 2       | 1       | 2       | 0        | 0       | 5        | 1         | 0         | 2         | 1         | 1         | 6         | Bacteria; Proteobacteria; Alphaproteobacteria; Rhizobiales; Rhizobiaceae; Kaistia            |
| Otu1573 | 0       | 4       | 1       | 0        | 7       | 3        | 5         | 5         | 3         | 0         | 8         | 0         | Bacteria; Chloroflexi; Anaerolineae; SBR1031; A4b                                            |

| #OTU ID | Z31DRh1 | Z31DRh2 | Z31DRh3 | Z31DRh4r | Z31DRh5 | Z31DRh6r | Z31J1DRh1 | Z31J1DRh2 | Z31J1DRh3 | Z31J1DRh4 | Z31J1DRh5 | Z31J1DRh6 | taxonomy                                                                                      |
|---------|---------|---------|---------|----------|---------|----------|-----------|-----------|-----------|-----------|-----------|-----------|-----------------------------------------------------------------------------------------------|
| Otu1570 | 0       | 0       | 0       | 0        | 4       | 0        | 5         | 0         | 0         | 0         | 2         | 0         | Bacteria; Bacteroidetes; Flavobacteriia; Flavobacteriales; Cryomorphaeae; Fluvicola           |
| Otu1571 | 0       | 8       | 2       | 3        | 2       | 3        | 3         | 2         | 1         | 1         | 1         | 2         | Bacteria                                                                                      |
| Otu1578 | 2       | 2       | 4       | 3        | 9       | 10       | 10        | 2         | 1         | 8         | 4         | 1         | Bacteria; Planctomycetes; vadinHA49; DH61                                                     |
| Otu1579 | 5       | 0       | 0       | 0        | 1       | 0        | 0         | 0         | 0         | 0         | 0         | 0         | Bacteria; Chloroflexi; Chloroflexi; Chloroflexales; Oscillochloridaceae; Oscillochloris       |
| Otu2057 | 0       | 2       | 0       | 1        | 1       | 0        | 1         | 0         | 1         | 2         | 7         | 0         | Bacteria; Verrucomicrobia                                                                     |
| Otu2987 | 15      | 0       | 3       | 2        | 0       | 6        | 1         | 0         | 1         | 1         | 1         | 0         | Bacteria; Actinobacteria; Actinobacteria; Actinomycetales; Micromonosporaceae                 |
| Otu2984 | 0       | 0       | 0       | 0        | 0       | 0        | 2         | 0         | 0         | 0         | 0         | 0         | Bacteria; Verrucomicrobia; Spartobacteria; Chthoniobacteriales; Chthoniobacteraceae           |
| Otu2985 | 0       | 0       | 0       | 0        | 0       | 0        | 0         | 0         | 2         | 0         | 0         | 0         | Bacteria; Cyanobacteria                                                                       |
| Otu2982 | 0       | 5       | 3       | 9        | 1       | 9        | 2         | 0         | 1         | 2         | 3         | 0         | Bacteria; Planctomycetes; Phycisphaerae; CPLa-3                                               |
| Otu2983 | 0       | 5       | 1       | 1        | 0       | 4        | 2         | 1         | 8         | 1         | 3         | 0         | Bacteria; Bacteroidetes; Cytophagia; Cytophagales; Cytophagaceae                              |
| Otu2980 | 0       | 0       | 0       | 0        | 0       | 0        | 0         | 0         | 0         | 0         | 3         | 0         | Bacteria                                                                                      |
| Otu2981 | 5       | 2       | 1       | 6        | 5       | 9        | 2         | 2         | 0         | 5         | 4         | 2         | Bacteria; Acidobacteria; Acidobacteria-6; iii1-15                                             |
| Otu3348 | 0       | 0       | 0       | 0        | 2       | 0        | 0         | 0         | 0         | 0         | 0         | 0         | Bacteria                                                                                      |
| Otu211  | 48      | 77      | 58      | 104      | 62      | 166      | 32        | 50        | 91        | 38        | 80        | 17        | Bacteria; Verrucomicrobia; Pedosphaerae; Pedosphaerales                                       |
| Otu2988 | 2       | 0       | 1       | 0        | 0       | 0        | 0         | 0         | 0         | 0         | 0         | 0         | Bacteria; Firmicutes; Clostridia; Clostridiales; Peptococcaceae; Desulfosporosinus            |
| Otu2989 | 0       | 0       | 0       | 0        | 0       | 0        | 0         | 0         | 1         | 0         | 2         | 0         | Bacteria; Proteobacteria; Deltaproteobacteria; Myxococcales                                   |
| Otu1534 | 0       | 1       | 0       | 4        | 0       | 9        | 4         | 1         | 3         | 1         | 1         | 3         | Bacteria; Actinobacteria; Actinobacteria; Actinomycetales; Actinosynnemataceae                |
| Otu210  | 35      | 34      | 114     | 111      | 29      | 121      | 56        | 75        | 41        | 21        | 38        | 60        | Bacteria; Proteobacteria; Betaproteobacteria; Burkholderiales; Burkholderiaceae; Burkholderia |
| Otu4049 | 0       | 0       | 0       | 3        | 0       | 8        | 1         | 0         | 2         | 1         | 0         | 0         | Bacteria; Chloroflexi; TK10; AKYG885; Dolo_23                                                 |
| Otu4048 | 1       | 0       | 0       | 0        | 1       | 2        | 0         | 0         | 0         | 0         | 2         | 0         | Bacteria; Proteobacteria; Deltaproteobacteria; Myxococcales                                   |
| Otu4041 | 0       | 4       | 0       | 1        | 0       | 0        | 1         | 0         | 0         | 0         | 1         | 0         | Bacteria; Proteobacteria; Alphaproteobacteria; Rhizobiales; Bradyrhizobiaceae                 |
| Otu4040 | 1       | 0       | 0       | 0        | 0       | 0        | 0         | 0         | 2         | 1         | 2         | 0         | Bacteria; Chloroflexi; TK10; B07_WMSP1; FFCH4570                                              |

| #OTU ID | Z31DRh1 | Z31DRh2 | Z31DRh3 | Z31DRh4r | Z31DRh5 | Z31DRh6r | Z31J1DRh1 | Z31J1DRh2 | Z31J1DRh3 | Z31J1DRh4 | Z31J1DRh5 | Z31J1DRh6 | taxonomy                                                                                           |
|---------|---------|---------|---------|----------|---------|----------|-----------|-----------|-----------|-----------|-----------|-----------|----------------------------------------------------------------------------------------------------|
| Otu4043 | 13      | 4       | 12      | 31       | 7       | 52       | 19        | 13        | 13        | 27        | 2         | 34        | Bacteria; Proteobacteria; Alphaproteobacteria; Rhizobiales                                         |
| Otu3609 | 0       | 0       | 0       | 0        | 2       | 0        | 0         | 0         | 0         | 0         | 0         | 0         | Bacteria; Proteobacteria; Alphaproteobacteria; Rhodospirillales                                    |
| Otu4045 | 0       | 1       | 0       | 0        | 0       | 0        | 2         | 0         | 0         | 0         | 0         | 0         | Bacteria; TM7; TM7-1                                                                               |
| Otu4044 | 0       | 0       | 0       | 0        | 0       | 0        | 0         | 0         | 0         | 0         | 0         | 2         | Bacteria; Actinobacteria; Acidimicrobiia; Acidimicrobiales                                         |
| Otu4047 | 3       | 0       | 0       | 0        | 0       | 0        | 0         | 0         | 0         | 0         | 0         | 0         | Bacteria; BRC1; PRR-11                                                                             |
| Otu4046 | 0       | 1       | 2       | 1        | 2       | 0        | 0         | 0         | 1         | 1         | 0         | 0         | Bacteria; Planctomycetes; Planctomycetia; Gemmatales; Gemmataceae                                  |
| Otu213  | 40      | 38      | 32      | 72       | 36      | 98       | 64        | 68        | 36        | 89        | 76        | 30        | Bacteria; Acidobacteria; Acidobacteriia; Acidobacteriales; Koribacteraceae                         |
| Otu4382 | 0       | 0       | 0       | 0        | 0       | 0        | 0         | 2         | 0         | 0         | 0         | 0         | Bacteria; Elusimicrobia; Elusimicrobia; FAC88                                                      |
| Otu2872 | 0       | 0       | 0       | 0        | 0       | 0        | 0         | 3         | 0         | 0         | 0         | 0         | Bacteria; Chlamydiae; Chlamydiia; Chlamydiales                                                     |
| Otu2873 | 1       | 0       | 1       | 1        | 0       | 1        | 0         | 0         | 2         | 0         | 1         | 0         | Bacteria; AD3; JG37-AG-4                                                                           |
| Otu2870 | 0       | 0       | 0       | 2        | 0       | 0        | 0         | 2         | 0         | 0         | 0         | 0         | Bacteria; Proteobacteria; Gammaproteobacteria                                                      |
| Otu2871 | 0       | 1       | 2       | 0        | 0       | 0        | 0         | 1         | 1         | 0         | 1         | 0         | Bacteria; Actinobacteria; Actinobacteria; Actinomycetales; Streptosporangiaceae; Streptosporangium |
| Otu2876 | 0       | 0       | 2       | 2        | 0       | 0        | 0         | 0         | 0         | 0         | 0         | 0         | Bacteria; Acidobacteria; BPC102                                                                    |
| Otu2877 | 0       | 0       | 0       | 0        | 0       | 1        | 0         | 2         | 0         | 0         | 0         | 0         | Bacteria; Planctomycetes; Planctomycetia; Gemmatales; Gemmataceae                                  |
| Otu2874 | 1       | 0       | 1       | 3        | 2       | 3        | 2         | 4         | 1         | 3         | 2         | 1         | Bacteria; Chlamydiae; Chlamydiia; Chlamydiales                                                     |
| Otu2875 | 0       | 0       | 1       | 0        | 0       | 1        | 2         | 0         | 0         | 0         | 0         | 0         | Bacteria; Armatimonadetes; Chthonomonadetes; Chthonomonadales                                      |
| Otu4444 | 9       | 10      | 15      | 9        | 8       | 31       | 9         | 7         | 14        | 13        | 13        | 2         | Bacteria; Acidobacteria; Solibacteres; Solibacterales; Solibacteraceae; Candidatus_Solibacter      |
| Otu2878 | 0       | 0       | 0       | 2        | 0       | 0        | 0         | 0         | 0         | 0         | 0         | 0         | Bacteria; Bacteroidetes; Sphingobacteriia; Sphingobacteriales; Sphingobacteriaceae                 |
| Otu2879 | 0       | 1       | 0       | 2        | 0       | 0        | 0         | 2         | 1         | 0         | 3         | 0         | Bacteria; Planctomycetes; BD7-11                                                                   |
| Otu4441 | 0       | 0       | 0       | 2        | 0       | 1        | 0         | 0         | 0         | 0         | 0         | 0         | Bacteria; Proteobacteria; Deltaproteobacteria; Syntrophobacteriales; Syntrophobacteraceae          |
| Otu4440 | 0       | 0       | 0       | 0        | 0       | 0        | 0         | 0         | 2         | 0         | 0         | 0         | Bacteria; Chlamydiae; Chlamydiia; Chlamydiales                                                     |
| Otu4443 | 0       | 0       | 0       | 1        | 0       | 0        | 0         | 0         | 0         | 0         | 0         | 3         | Bacteria; Tenericutes; CK-1C4-19                                                                   |

| #OTU ID | Z31DRh1 | Z31DRh2 | Z31DRh3 | Z31DRh4r | Z31DRh5 | Z31DRh6r | Z31J1DRh1 | Z31J1DRh2 | Z31J1DRh3 | Z31J1DRh4 | Z31J1DRh5 | Z31J1DRh6 | taxonomy                                                                                           |
|---------|---------|---------|---------|----------|---------|----------|-----------|-----------|-----------|-----------|-----------|-----------|----------------------------------------------------------------------------------------------------|
| Otu4442 | 0       | 2       | 0       | 0        | 0       | 0        | 0         | 0         | 0         | 0         | 0         | 0         | Bacteria; Bacteroidetes                                                                            |
| Otu2728 | 0       | 4       | 0       | 0        | 0       | 1        | 1         | 1         | 1         | 0         | 2         | 1         | Bacteria; Acidobacteria; Acidobacteriia; Acidobacteriales; Koribacteraceae                         |
| Otu2729 | 3       | 3       | 0       | 5        | 2       | 5        | 2         | 1         | 1         | 9         | 4         | 3         | Bacteria; Planctomycetes; Phycisphaerae; WD2101                                                    |
| Otu212  | 18      | 13      | 21      | 22       | 10      | 39       | 10        | 96        | 42        | 9         | 19        | 16        | Bacteria; Actinobacteria; Thermoleophilia; Solirubrobacterales; Conexibacteraceae; Conexibacter    |
| Otu2722 | 0       | 0       | 0       | 0        | 1       | 0        | 0         | 0         | 0         | 0         | 2         | 0         | Bacteria; Proteobacteria; Deltaproteobacteria; Myxococcales                                        |
| Otu2723 | 3       | 5       | 3       | 10       | 2       | 6        | 6         | 6         | 8         | 9         | 3         | 2         | Bacteria; Proteobacteria; Alphaproteobacteria; Sphingomonadales; Erythrobacteraceae                |
| Otu2720 | 1       | 1       | 0       | 1        | 0       | 0        | 3         | 2         | 0         | 5         | 0         | 0         | Bacteria; Bacteroidetes; Cytophagia; Cytophagales; Cytophagaceae                                   |
| Otu2721 | 0       | 0       | 0       | 0        | 0       | 2        | 0         | 0         | 0         | 0         | 0         | 0         | Bacteria                                                                                           |
| Otu2726 | 0       | 2       | 0       | 0        | 0       | 0        | 0         | 0         | 0         | 0         | 0         | 0         | Bacteria; Acidobacteria; Chloracidobacteria; RB41                                                  |
| Otu2727 | 0       | 2       | 0       | 1        | 1       | 0        | 0         | 0         | 0         | 0         | 0         | 0         | Bacteria; Proteobacteria; Deltaproteobacteria; Bdellovibrionales; Bdellovibrionaceae; Bdellovibrio |
| Otu2724 | 0       | 0       | 1       | 0        | 2       | 0        | 0         | 0         | 0         | 0         | 2         | 0         | Bacteria; OD1; ABY1                                                                                |
| Otu2725 | 0       | 0       | 0       | 3        | 0       | 0        | 0         | 0         | 0         | 0         | 0         | 0         | Bacteria; Proteobacteria; Alphaproteobacteria; Sphingomonadales; Sphingomonadaceae                 |
| Otu3255 | 0       | 0       | 0       | 0        | 0       | 2        | 0         | 0         | 0         | 0         | 0         | 1         | Bacteria; Planctomycetes; Planctomycetia; Gemmatales; Gemmataceae                                  |
| Otu3254 | 0       | 2       | 0       | 0        | 0       | 0        | 0         | 0         | 0         | 0         | 0         | 0         | Bacteria; Proteobacteria; Betaproteobacteria; Burkholderiales; Comamonadaceae                      |
| Otu4213 | 3       | 3       | 3       | 0        | 0       | 4        | 0         | 0         | 5         | 1         | 0         | 2         | Bacteria; Actinobacteria; Actinobacteria; Actinomycetales                                          |
| Otu2618 | 0       | 0       | 0       | 0        | 0       | 0        | 0         | 2         | 0         | 0         | 0         | 0         | Bacteria; Proteobacteria; Gammaproteobacteria                                                      |
| Otu3257 | 0       | 0       | 0       | 0        | 3       | 0        | 2         | 2         | 2         | 5         | 1         | 0         | Bacteria; Proteobacteria; Alphaproteobacteria; Rhodospirillales; Rhodospirillaceae                 |
| Otu2161 | 0       | 0       | 0       | 3        | 0       | 3        | 2         | 0         | 2         | 0         | 0         | 0         | Bacteria; Proteobacteria; Deltaproteobacteria; Bdellovibrionales; Bdellovibrionaceae               |
| Otu3256 | 1       | 0       | 2       | 0        | 0       | 1        | 0         | 0         | 0         | 0         | 0         | 0         | Bacteria; Planctomycetes; Planctomycetia; Gemmatales; Gemmataceae                                  |
| Otu1198 | 2       | 1       | 0       | 12       | 0       | 3        | 0         | 2         | 1         | 1         | 4         | 0         | Bacteria; Chloroflexi; C0119                                                                       |
| Otu1199 | 0       | 3       | 1       | 1        | 0       | 0        | 5         | 2         | 1         | 0         | 12        | 0         | Bacteria; Proteobacteria; Betaproteobacteria; MND1                                                 |
| Otu3913 | 0       | 4       | 0       | 0        | 0       | 0        | 0         | 0         | 0         | 0         | 0         | 0         | Bacteria; Bacteroidetes                                                                            |

| #OTU ID | Z31DRh1 | Z31DRh2 | Z31DRh3 | Z31DRh4r | Z31DRh5 | Z31DRh6r | Z31J1DRh1 | Z31J1DRh2 | Z31J1DRh3 | Z31J1DRh4 | Z31J1DRh5 | Z31J1DRh6 | taxonomy                                                                                    |
|---------|---------|---------|---------|----------|---------|----------|-----------|-----------|-----------|-----------|-----------|-----------|---------------------------------------------------------------------------------------------|
| Otu1194 | 3       | 5       | 2       | 12       | 4       | 2        | 3         | 0         | 1         | 3         | 7         | 2         | Bacteria; Planctomycetes; Phycisphaerae; WD2101                                             |
| Otu1195 | 6       | 2       | 2       | 5        | 4       | 12       | 6         | 9         | 6         | 5         | 5         | 6         | Bacteria; Proteobacteria; Gammaproteobacteria; Xanthomonadales; Sinobacteraceae             |
| Otu1196 | 0       | 0       | 0       | 7        | 0       | 0        | 0         | 0         | 8         | 0         | 0         | 1         | Bacteria                                                                                    |
| Otu1197 | 0       | 3       | 0       | 0        | 0       | 2        | 12        | 7         | 1         | 0         | 2         | 0         | Bacteria; TM6; SJA-4                                                                        |
| Otu1190 | 0       | 9       | 3       | 2        | 0       | 2        | 4         | 0         | 0         | 2         | 0         | 0         | Bacteria; Proteobacteria; Alphaproteobacteria; Rhodobacterales; Hyphomonadaceae             |
| Otu1191 | 0       | 0       | 1       | 0        | 0       | 0        | 0         | 8         | 0         | 2         | 0         | 0         | Bacteria; Proteobacteria; Alphaproteobacteria; Rickettsiales                                |
| Otu1192 | 0       | 2       | 3       | 0        | 2       | 4        | 0         | 0         | 0         | 0         | 11        | 0         | Bacteria; Chloroflexi; Anaerolineae; CFB-26                                                 |
| Otu1193 | 0       | 0       | 0       | 0        | 0       | 0        | 0         | 8         | 0         | 0         | 0         | 0         | Bacteria; Proteobacteria; Alphaproteobacteria                                               |
| Otu3253 | 2       | 1       | 0       | 0        | 1       | 2        | 3         | 1         | 3         | 0         | 3         | 1         | Bacteria; Proteobacteria; Alphaproteobacteria; Rhodospirillales; Rhodospirillaceae          |
| Otu1358 | 3       | 2       | 0       | 4        | 1       | 5        | 1         | 8         | 1         | 2         | 2         | 2         | Bacteria; Proteobacteria                                                                    |
| Otu1359 | 0       | 3       | 2       | 1        | 7       | 3        | 2         | 1         | 0         | 3         | 0         | 0         | Bacteria; Planctomycetes; Planctomycetia; Planctomycetales; Planctomycetaceae; Planctomyces |
| Otu1356 | 0       | 0       | 0       | 0        | 0       | 0        | 0         | 6         | 0         | 0         | 0         | 0         | Bacteria; Proteobacteria; Gammaproteobacteria; Legionellales; Coxiellaceae; Aquicella       |
| Otu1357 | 31      | 16      | 25      | 48       | 16      | 70       | 16        | 13        | 20        | 13        | 15        | 14        | Bacteria; Proteobacteria; Alphaproteobacteria; Caulobacterales; Caulobacteraceae            |
| Otu1354 | 1       | 9       | 1       | 4        | 4       | 8        | 0         | 14        | 1         | 2         | 9         | 0         | Bacteria; Chloroflexi; S085                                                                 |
| Otu1355 | 2       | 1       | 3       | 6        | 1       | 11       | 9         | 10        | 6         | 2         | 2         | 4         | Bacteria; Planctomycetes; Phycisphaerae; WD2101                                             |
| Otu1352 | 0       | 2       | 3       | 1        | 3       | 6        | 1         | 1         | 0         | 1         | 0         | 0         | Bacteria; Armatimonadetes; OPB50                                                            |
| Otu1350 | 0       | 0       | 1       | 2        | 1       | 13       | 0         | 3         | 0         | 8         | 0         | 0         | Bacteria; Chloroflexi; Anaerolineae; SBR1031; oc28                                          |
| Otu1351 | 0       | 6       | 0       | 0        | 5       | 1        | 0         | 0         | 0         | 0         | 1         | 0         | Bacteria; Planctomycetes; Planctomycetia; Pirellulales; Pirellulaceae                       |
| Otu2162 | 7       | 0       | 2       | 21       | 0       | 0        | 0         | 0         | 0         | 0         | 0         | 3         | Bacteria; Bacteroidetes; Saprospirae; Saprospirales; Chitinophagaceae                       |
| Otu2454 | 0       | 4       | 0       | 10       | 0       | 0        | 0         | 0         | 0         | 0         | 2         | 0         | Bacteria; Chloroflexi; Anaerolineae                                                         |
| Otu2614 | 0       | 0       | 0       | 0        | 0       | 0        | 0         | 0         | 0         | 0         | 2         | 0         | Bacteria                                                                                    |
| Otu2615 | 1       | 2       | 2       | 8        | 2       | 1        | 2         | 1         | 0         | 4         | 7         | 0         | Bacteria; Actinobacteria; Acidimicrobiia; Acidimicrobiales                                  |

| #OTU ID | Z31DRh1 | Z31DRh2 | Z31DRh3 | Z31DRh4r | Z31DRh5 | Z31DRh6r | Z31J1DRh1 | Z31J1DRh2 | Z31J1DRh3 | Z31J1DRh4 | Z31J1DRh5 | Z31J1DRh6 | taxonomy                                                                                           |
|---------|---------|---------|---------|----------|---------|----------|-----------|-----------|-----------|-----------|-----------|-----------|----------------------------------------------------------------------------------------------------|
| Otu329  | 79      | 35      | 42      | 126      | 18      | 136      | 13        | 20        | 33        | 9         | 46        | 60        | Bacteria; Verrucomicrobia; Opitutae; Opitutales; Opitutaceae                                       |
| Otu328  | 41      | 20      | 32      | 41       | 13      | 79       | 26        | 38        | 28        | 27        | 24        | 23        | Bacteria; Planctomycetes; Phycisphaerae; WD2101                                                    |
| Otu499  | 11      | 11      | 7       | 7        | 12      | 44       | 11        | 20        | 18        | 12        | 24        | 5         | Bacteria; Acidobacteria                                                                            |
| Otu498  | 17      | 52      | 18      | 27       | 40      | 71       | 25        | 22        | 36        | 45        | 45        | 14        | Bacteria; Planctomycetes; BD7-11                                                                   |
| Otu497  | 7       | 13      | 14      | 17       | 7       | 28       | 17        | 18        | 14        | 13        | 19        | 6         | Bacteria                                                                                           |
| Otu496  | 30      | 7       | 4       | 16       | 6       | 17       | 9         | 5         | 8         | 1         | 8         | 24        | Bacteria; Proteobacteria; Deltaproteobacteria; Myxococcales; Cystobacterineae                      |
| Otu495  | 7       | 0       | 2       | 4        | 0       | 32       | 0         | 1         | 0         | 0         | 0         | 3         | Bacteria; Proteobacteria; Deltaproteobacteria; Bdellovibrionales; Bdellovibrionaceae; Bdellovibrio |
| Otu494  | 0       | 0       | 0       | 1        | 35      | 0        | 0         | 4         | 0         | 1         | 0         | 1         | Bacteria; Bacteroidetes; VC2_1_Bac22                                                               |
| Otu493  | 0       | 11      | 0       | 1        | 11      | 5        | 0         | 0         | 0         | 1         | 49        | 0         | Bacteria; Proteobacteria; Betaproteobacteria; Rhodocyclales; Rhodocyclaceae                        |
| Otu492  | 8       | 6       | 11      | 23       | 56      | 82       | 19        | 23        | 11        | 25        | 20        | 23        | Bacteria; Gemmatimonadetes; Gemmatimonadetes; Ellin5290                                            |
| Otu491  | 14      | 26      | 25      | 28       | 17      | 50       | 34        | 54        | 15        | 36        | 26        | 9         | Bacteria; Proteobacteria; Alphaproteobacteria; Ellin329                                            |
| Otu490  | 45      | 4       | 5       | 29       | 9       | 11       | 6         | 6         | 4         | 1         | 1         | 4         | Bacteria; Bacteroidetes; Cytophagia; Cytophagales; Cytophagaceae                                   |
| Otu4131 | 0       | 0       | 0       | 0        | 0       | 0        | 0         | 0         | 0         | 0         | 2         | 0         | Bacteria; Actinobacteria; Actinobacteria                                                           |
| Otu4130 | 38      | 2       | 9       | 13       | 2       | 54       | 3         | 0         | 1         | 0         | 2         | 0         | Bacteria; Acidobacteria; Chloracidobacteria; RB41; Ellin6075                                       |
| Otu4133 | 0       | 2       | 1       | 2        | 0       | 0        | 1         | 0         | 0         | 0         | 0         | 0         | Bacteria; Armatimonadetes; Chthonomonadetes; Chthonomonadales; Chthonomonadaceae                   |
| Otu4132 | 1       | 0       | 0       | 5        | 0       | 0        | 0         | 0         | 1         | 0         | 1         | 1         | Bacteria; Chloroflexi; Thermomicrobia; Ellin6537                                                   |
| Otu4135 | 3       | 3       | 8       | 20       | 3       | 26       | 10        | 9         | 10        | 8         | 8         | 4         | Bacteria; Chloroflexi; TK10; AKYG885; Dolo_23                                                      |
| Otu4134 | 3       | 0       | 1       | 4        | 0       | 1        | 0         | 2         | 4         | 1         | 1         | 0         | Bacteria; Proteobacteria; Gammaproteobacteria; Xanthomonadales; Xanthomonadaceae                   |
| Otu1753 | 0       | 2       | 0       | 4        | 5       | 0        | 0         | 0         | 0         | 0         | 0         | 0         | Bacteria; Armatimonadetes; Fimbriimonadia; Fimbriimonadales; Fimbriimonadaceae                     |
| Otu4136 | 1       | 0       | 0       | 0        | 0       | 0        | 1         | 0         | 0         | 2         | 0         | 0         | Bacteria; Proteobacteria; Deltaproteobacteria; Myxococcales; Myxococcaceae                         |
| Otu4113 | 3       | 0       | 0       | 0        | 0       | 0        | 0         | 0         | 0         | 0         | 0         | 0         | Bacteria; Gemmatimonadetes; Gemmatimonadetes                                                       |
| Otu4138 | 0       | 2       | 4       | 6        | 2       | 7        | 5         | 10        | 2         | 0         | 1         | 4         | Bacteria; Actinobacteria; Actinobacteria; Actinomycetales                                          |

| #OTU ID | Z31DRh1 | Z31DRh2 | Z31DRh3 | Z31DRh4r | Z31DRh5 | Z31DRh6r | Z31J1DRh1 | Z31J1DRh2 | Z31J1DRh3 | Z31J1DRh4 | Z31J1DRh5 | Z31J1DRh6 | taxonomy                                                                                             |
|---------|---------|---------|---------|----------|---------|----------|-----------|-----------|-----------|-----------|-----------|-----------|------------------------------------------------------------------------------------------------------|
| Otu2769 | 0       | 0       | 0       | 4        | 0       | 0        | 0         | 0         | 0         | 0         | 0         | 0         | Bacteria; Firmicutes; Clostridia; Clostridiales; Lachnospiraceae; Clostridium; Clostridium_citroniae |
| Otu3581 | 0       | 1       | 0       | 2        | 0       | 0        | 1         | 0         | 0         | 2         | 0         | 0         | Bacteria; Proteobacteria; TA18; PHOS-HD29                                                            |
| Otu3580 | 0       | 0       | 0       | 0        | 0       | 0        | 0         | 0         | 0         | 2         | 0         | 0         | Bacteria; Proteobacteria; Deltaproteobacteria; Myxococcales                                          |
| Otu3583 | 0       | 2       | 1       | 3        | 0       | 1        | 1         | 3         | 1         | 0         | 3         | 3         | Bacteria; Armatimonadetes; 0319-6E2                                                                  |
| Otu3582 | 0       | 0       | 0       | 0        | 0       | 2        | 0         | 1         | 0         | 0         | 0         | 0         | Bacteria; Proteobacteria; Alphaproteobacteria; Rhizobiales                                           |
| Otu3585 | 0       | 0       | 0       | 0        | 0       | 2        | 0         | 0         | 0         | 0         | 0         | 0         | Bacteria; Bacteroidetes; Saprospirae; Saprospirales; Chitinophagaceae                                |
| Otu3584 | 0       | 0       | 2       | 1        | 0       | 5        | 1         | 0         | 0         | 1         | 2         | 0         | Bacteria; Proteobacteria; Alphaproteobacteria; Rhodospirillales; Rhodospirillaceae; Telmatospirillum |
| Otu3587 | 0       | 0       | 2       | 3        | 0       | 8        | 0         | 1         | 0         | 3         | 0         | 3         | Bacteria; Chloroflexi; Ktedonobacteria; JG30-KF-AS9                                                  |
| Otu3586 | 0       | 0       | 0       | 0        | 0       | 0        | 2         | 0         | 0         | 0         | 0         | 0         | Bacteria                                                                                             |
| Otu3589 | 5       | 5       | 4       | 2        | 1       | 6        | 1         | 3         | 1         | 7         | 4         | 2         | Bacteria; Planctomycetes; Phycisphaerae; WD2101                                                      |
| Otu3588 | 0       | 6       | 0       | 6        | 3       | 3        | 3         | 0         | 2         | 2         | 3         | 1         | Bacteria; Verrucomicrobia; Pedosphaerae; Pedosphaerales                                              |
| Otu3931 | 0       | 0       | 1       | 1        | 0       | 0        | 0         | 0         | 0         | 0         | 3         | 0         | Bacteria; Acidobacteria; TM1                                                                         |
| Otu1118 | 2       | 2       | 1       | 3        | 2       | 20       | 1         | 2         | 5         | 5         | 3         | 2         | Bacteria; Armatimonadetes; Fimbriimonadia; Fimbriimonadales; Fimbriimonadaceae; Fimbriimonas         |
| Otu4432 | 0       | 0       | 0       | 0        | 0       | 0        | 0         | 2         | 0         | 1         | 0         | 0         | Bacteria                                                                                             |
| Otu4324 | 2       | 2       | 0       | 0        | 0       | 0        | 0         | 0         | 0         | 0         | 0         | 0         | Bacteria; Chloroflexi; TK10; B07_WMSP1                                                               |
| Otu927  | 6       | 2       | 5       | 12       | 7       | 23       | 7         | 3         | 4         | 4         | 10        | 4         | Bacteria; Chloroflexi; C0119                                                                         |
| Otu925  | 9       | 12      | 7       | 13       | 1       | 19       | 3         | 7         | 0         | 4         | 4         | 3         | Bacteria; Actinobacteria; Acidimicrobia; Acidimicrobiales; EB1017                                    |
| Otu924  | 0       | 4       | 3       | 5        | 5       | 24       | 6         | 14        | 11        | 2         | 2         | 12        | Bacteria; Actinobacteria; Actinobacteria; Actinomycetales                                            |
| Otu923  | 3       | 11      | 0       | 4        | 0       | 7        | 3         | 0         | 0         | 3         | 9         | 0         | Bacteria; Proteobacteria; Gammaproteobacteria                                                        |
| Otu922  | 8       | 18      | 8       | 8        | 12      | 6        | 7         | 6         | 4         | 13        | 20        | 12        | Bacteria; Gemmatimonadetes; Gemm-1                                                                   |
| Otu921  | 1       | 5       | 2       | 6        | 1       | 10       | 2         | 7         | 8         | 4         | 12        | 0         | Bacteria; Proteobacteria; Deltaproteobacteria; Myxococcales                                          |
| Otu920  | 5       | 17      | 2       | 13       | 15      | 25       | 20        | 9         | 11        | 14        | 20        | 9         | Bacteria; Proteobacteria; Alphaproteobacteria; Rhizobiales; Hyphomicrobiaceae; Hyphomicrobium        |





| #OTU ID | Z31DRh1 | Z31DRh2 | Z31DRh3 | Z31DRh4r | Z31DRh5 | Z31DRh6r | Z31J1DRh1 | Z31J1DRh2 | Z31J1DRh3 | Z31J1DRh4 | Z31J1DRh5 | Z31J1DRh6 | taxonomy                                                                                          |
|---------|---------|---------|---------|----------|---------|----------|-----------|-----------|-----------|-----------|-----------|-----------|---------------------------------------------------------------------------------------------------|
| Otu3051 | 0       | 0       | 0       | 0        | 3       | 0        | 0         | 0         | 0         | 0         | 0         | 0         | Bacteria; Bacteroidetes; Flavobacteriia; Flavobacteriales; Flavobacteriaceae                      |
| Otu3050 | 4       | 2       | 2       | 0        | 0       | 12       | 0         | 0         | 4         | 0         | 0         | 11        | Bacteria; Bacteroidetes; Cytophagia; Cytophagales; Cytophagaceae; Cytophaga                       |
| Otu3057 | 1       | 1       | 0       | 1        | 1       | 1        | 0         | 0         | 2         | 3         | 3         | 1         | Bacteria; Planctomycetes; Planctomycetia; Gemmatales; Gemmataceae                                 |
| Otu3056 | 0       | 0       | 1       | 2        | 0       | 1        | 1         | 1         | 0         | 0         | 0         | 0         | Bacteria; OD1; ZB2                                                                                |
| Otu3055 | 0       | 2       | 0       | 0        | 0       | 0        | 0         | 0         | 0         | 0         | 0         | 0         | Bacteria                                                                                          |
| Otu3054 | 102     | 76      | 73      | 180      | 111     | 108      | 83        | 30        | 62        | 232       | 61        | 70        | Bacteria; Proteobacteria; Betaproteobacteria; Burkholderiales; Comamonadaceae; Rubrivivax         |
| Otu4326 | 0       | 2       | 0       | 0        | 0       | 0        | 0         | 0         | 0         | 0         | 0         | 0         | Bacteria; Proteobacteria; Deltaproteobacteria; Myxococcales                                       |
| Otu4147 | 0       | 0       | 0       | 1        | 0       | 0        | 0         | 0         | 2         | 0         | 0         | 0         | Bacteria; Gemmatimonadetes; Gemmatimonadetes                                                      |
| Otu3279 | 1       | 2       | 0       | 0        | 1       | 7        | 2         | 5         | 2         | 3         | 3         | 3         | Bacteria; Planctomycetes; Planctomycetia; Planctomycetales; Planctomycetaceae; Planctomyces       |
| Otu4391 | 0       | 1       | 0       | 0        | 0       | 0        | 0         | 0         | 0         | 0         | 4         | 0         | Bacteria; Gemmatimonadetes; Gemm-1                                                                |
| Otu1978 | 0       | 0       | 0       | 0        | 0       | 5        | 0         | 0         | 0         | 0         | 0         | 0         | Bacteria; Gemmatimonadetes; Gemmatimonadetes                                                      |
| Otu1979 | 4       | 4       | 8       | 6        | 2       | 6        | 7         | 7         | 5         | 3         | 2         | 2         | Bacteria; Proteobacteria; Deltaproteobacteria; Myxococcales                                       |
| Otu4390 | 0       | 0       | 0       | 0        | 0       | 2        | 0         | 0         | 0         | 0         | 0         | 0         | Bacteria; Proteobacteria; Deltaproteobacteria; Spirobaillales                                     |
| Otu1972 | 0       | 0       | 0       | 0        | 0       | 0        | 0         | 0         | 4         | 0         | 0         | 0         | Bacteria; Proteobacteria; Alphaproteobacteria; Sphingomonadales; Sphingomonadaceae                |
| Otu1973 | 5       | 4       | 1       | 0        | 1       | 4        | 1         | 0         | 0         | 0         | 1         | 0         | Bacteria; Verrucomicrobia; Spartobacteria; Chthoniobacteriales; Chthoniobacteraceae; Ellin506     |
| Otu1970 | 2       | 20      | 2       | 8        | 2       | 9        | 13        | 18        | 16        | 1         | 7         | 4         | Bacteria; Acidobacteria; Acidobacteriia; Acidobacteriales; Koribacteraceae; Candidatus_Koribacter |
| Otu1971 | 1       | 5       | 2       | 12       | 4       | 11       | 0         | 2         | 6         | 1         | 1         | 1         | Bacteria; Bacteroidetes; Saprospirae; Saprospirales; Chitinophagaceae                             |
| Otu1976 | 0       | 1       | 0       | 0        | 0       | 0        | 5         | 0         | 0         | 0         | 1         | 0         | Bacteria; Chlamydiae; Chlamydia; Chlamydiales                                                     |
| Otu1977 | 0       | 0       | 0       | 0        | 0       | 3        | 0         | 0         | 0         | 0         | 0         | 0         | Bacteria; Proteobacteria                                                                          |
| Otu1974 | 2       | 0       | 1       | 4        | 1       | 5        | 4         | 2         | 3         | 5         | 3         | 0         | Bacteria; FBP                                                                                     |
| Otu1975 | 57      | 13      | 59      | 98       | 13      | 86       | 45        | 27        | 43        | 22        | 13        | 39        | Bacteria; Proteobacteria; Gammaproteobacteria; Xanthomonadales; Xanthomonadaceae                  |
| Otu813  | 14      | 4       | 0       | 2        | 12      | 16       | 0         | 4         | 0         | 0         | 17        | 0         | Bacteria; Proteobacteria; Betaproteobacteria; Rhodocyclales; Rhodocyclaceae                       |

| #OTU ID | Z31DRh1 | Z31DRh2 | Z31DRh3 | Z31DRh4r | Z31DRh5 | Z31DRh6r | Z31J1DRh1 | Z31J1DRh2 | Z31J1DRh3 | Z31J1DRh4 | Z31J1DRh5 | Z31J1DRh6 | taxonomy                                                                                                                 |
|---------|---------|---------|---------|----------|---------|----------|-----------|-----------|-----------|-----------|-----------|-----------|--------------------------------------------------------------------------------------------------------------------------|
| Otu812  | 16      | 4       | 2       | 8        | 2       | 21       | 2         | 0         | 0         | 0         | 2         | 9         | Bacteria; Proteobacteria; Gammaproteobacteria; Pseudomonadales; Pseudomonadaceae                                         |
| Otu811  | 45      | 37      | 46      | 139      | 32      | 102      | 56        | 96        | 67        | 32        | 25        | 59        | Bacteria; Bacteroidetes; Saprospirae; Saprospirales; Chitinophagaceae                                                    |
| Otu810  | 14      | 28      | 4       | 14       | 9       | 4        | 15        | 1         | 2         | 4         | 8         | 2         | Bacteria; Nitrospirae; Nitrospira; Nitrospirales; 0319-6A21                                                              |
| Otu817  | 10      | 14      | 5       | 9        | 7       | 41       | 8         | 3         | 5         | 20        | 15        | 1         | Bacteria; Armatimonadetes; Fimbriimonadia; Fimbriimonadales; Fimbriimonadaceae; Fimbriimonas                             |
| Otu816  | 6       | 2       | 6       | 7        | 4       | 22       | 5         | 2         | 7         | 5         | 6         | 0         | Bacteria                                                                                                                 |
| Otu815  | 0       | 1       | 1       | 0        | 17      | 23       | 4         | 9         | 5         | 7         | 2         | 13        | Bacteria; Proteobacteria; Alphaproteobacteria; Rhodospirillales; Acetobacteraceae                                        |
| Otu814  | 0       | 4       | 0       | 2        | 2       | 8        | 10        | 16        | 7         | 0         | 4         | 1         | Bacteria; Acidobacteria; Acidobacteria-6; iii1-15; RB40                                                                  |
| Otu3138 | 0       | 0       | 0       | 0        | 0       | 0        | 0         | 0         | 0         | 2         | 2         | 0         | Bacteria; Proteobacteria; Alphaproteobacteria                                                                            |
| Otu3139 | 2       | 0       | 2       | 1        | 0       | 4        | 1         | 2         | 5         | 0         | 0         | 1         | Bacteria; TM7; TM7-3                                                                                                     |
| Otu819  | 51      | 62      | 47      | 92       | 49      | 106      | 17        | 37        | 48        | 75        | 46        | 22        | Bacteria; Bacteroidetes; Saprospirae; Saprospirales; Chitinophagaceae; Flavisolibacter                                   |
| Otu818  | 4       | 0       | 0       | 0        | 0       | 1        | 0         | 0         | 0         | 1         | 0         | 17        | Bacteria; Proteobacteria; Alphaproteobacteria; Caulobacteriales; Caulobacteraceae; Brevundimonas; Brevundimonas_diminuta |
| Otu4394 | 0       | 1       | 3       | 1        | 1       | 1        | 1         | 0         | 0         | 0         | 4         | 0         | Bacteria; OD1; SM2F11                                                                                                    |
| Otu1503 | 1       | 4       | 2       | 9        | 0       | 4        | 4         | 0         | 0         | 0         | 5         | 0         | Bacteria; Chloroflexi; Anaerolineae; S0208                                                                               |
| Otu3935 | 0       | 1       | 0       | 0        | 0       | 0        | 2         | 3         | 1         | 0         | 0         | 0         | Bacteria; TM6; SJA-4                                                                                                     |
| Otu4397 | 16      | 3       | 5       | 74       | 21      | 14       | 0         | 2         | 5         | 1         | 2         | 8         | Bacteria; Bacteroidetes; Saprospirae; Saprospirales; Chitinophagaceae                                                    |
| Otu2478 | 0       | 0       | 0       | 0        | 3       | 0        | 0         | 0         | 0         | 0         | 1         | 0         | Bacteria; Proteobacteria; Gammaproteobacteria; Xanthomonadales; Xanthomonadaceae                                         |
| Otu1502 | 2       | 8       | 1       | 3        | 3       | 6        | 1         | 0         | 1         | 4         | 1         | 1         | Bacteria; Acidobacteria; Chloracidobacteria; PK29                                                                        |
| Otu2476 | 0       | 0       | 3       | 1        | 0       | 0        | 1         | 1         | 3         | 1         | 0         | 0         | Bacteria; Chloroflexi; Ktedonobacteria; JG30-KF-AS9                                                                      |
| Otu2477 | 0       | 1       | 1       | 3        | 0       | 0        | 1         | 1         | 0         | 2         | 1         | 0         | Bacteria; Firmicutes; Bacilli; Bacillales; Alicyclobacillaceae; Alicyclobacillus                                         |
| Otu2474 | 0       | 0       | 0       | 0        | 2       | 3        | 0         | 0         | 0         | 1         | 0         | 0         | Bacteria; Chlorobi                                                                                                       |
| Otu2475 | 0       | 1       | 1       | 0        | 0       | 2        | 0         | 2         | 3         | 3         | 2         | 0         | Bacteria; Proteobacteria; Gammaproteobacteria                                                                            |
| Otu2472 | 0       | 0       | 0       | 0        | 0       | 3        | 0         | 0         | 0         | 0         | 0         | 0         | Bacteria; Proteobacteria; Deltaproteobacteria; Bdellovibrionales; Bdellovibrionaceae                                     |



| #OTU ID | Z31DRh1 | Z31DRh2 | Z31DRh3 | Z31DRh4r | Z31DRh5 | Z31DRh6r | Z31J1DRh1 | Z31J1DRh2 | Z31J1DRh3 | Z31J1DRh4 | Z31J1DRh5 | Z31J1DRh6 | taxonomy                                                                                           |
|---------|---------|---------|---------|----------|---------|----------|-----------|-----------|-----------|-----------|-----------|-----------|----------------------------------------------------------------------------------------------------|
| Otu3221 | 0       | 0       | 0       | 0        | 0       | 0        | 0         | 0         | 3         | 0         | 0         | 2         | Bacteria; Proteobacteria; Gammaproteobacteria; Legionellales; Coxiellaceae                         |
| Otu3222 | 0       | 0       | 0       | 0        | 1       | 0        | 1         | 2         | 2         | 3         | 1         | 1         | Bacteria; ODI; SM2F11                                                                              |
| Otu3223 | 0       | 0       | 0       | 2        | 0       | 0        | 0         | 0         | 0         | 0         | 0         | 0         | Bacteria                                                                                           |
| Otu3487 | 1       | 0       | 0       | 2        | 2       | 2        | 0         | 1         | 0         | 0         | 0         | 0         | Bacteria; Planctomycetes; Planctomycetia; Gemmatales; Gemmataceae; Gemmata                         |
| Otu4323 | 0       | 0       | 0       | 1        | 0       | 1        | 0         | 0         | 0         | 0         | 2         | 0         | Bacteria; Planctomycetes; Planctomycetia; Gemmatales; Gemmataceae; Gemmata                         |
| Otu1752 | 0       | 11      | 2       | 1        | 0       | 0        | 0         | 0         | 0         | 0         | 5         | 0         | Bacteria; Chloroflexi; Anaerolineae; CFB-26                                                        |
| Otu1019 | 8       | 1       | 2       | 9        | 0       | 0        | 4         | 10        | 11        | 10        | 10        | 0         | Bacteria; Proteobacteria; Alphaproteobacteria                                                      |
| Otu1750 | 4       | 0       | 1       | 4        | 0       | 4        | 4         | 2         | 1         | 2         | 0         | 4         | Bacteria; Proteobacteria; Deltaproteobacteria; Bdellovibrionales; Bdellovibrionaceae; Bdellovibrio |
| Otu1751 | 2       | 0       | 1       | 4        | 1       | 1        | 0         | 0         | 0         | 0         | 1         | 0         | Bacteria; Verrucomicrobia; Pedosphaerae; Pedosphaerales                                            |
| Otu1756 | 4       | 0       | 1       | 0        | 0       | 2        | 1         | 0         | 2         | 0         | 3         | 0         | Bacteria; Planctomycetes; Planctomycetia; Gemmatales; Gemmataceae                                  |
| Otu1757 | 0       | 0       | 0       | 5        | 0       | 0        | 0         | 0         | 0         | 0         | 0         | 0         | Bacteria; Proteobacteria; Gammaproteobacteria; Legionellales                                       |
| Otu1754 | 32      | 46      | 39      | 97       | 39      | 61       | 38        | 30        | 39        | 71        | 77        | 17        | Bacteria; Bacteroidetes; Saprospirae; Saprospirales; Chitinophagaceae; Flavisolibacter             |
| Otu1018 | 4       | 5       | 7       | 13       | 7       | 2        | 0         | 0         | 0         | 1         | 10        | 0         | Bacteria; Bacteroidetes                                                                            |
| Otu2065 | 4       | 2       | 0       | 2        | 2       | 1        | 5         | 0         | 2         | 0         | 1         | 2         | Bacteria; Proteobacteria; Alphaproteobacteria; Rhodospirillales; Rhodospirillaceae                 |
| Otu2064 | 4       | 3       | 1       | 5        | 1       | 1        | 5         | 3         | 1         | 5         | 11        | 1         | Bacteria; Gemmatimonadetes; Gemmatimonadetes; Gemmatimonadales                                     |
| Otu1758 | 3       | 10      | 4       | 8        | 11      | 6        | 2         | 2         | 4         | 3         | 8         | 3         | Bacteria; Verrucomicrobia; Pedosphaerae; Pedosphaerales; Ellin515                                  |
| Otu1759 | 0       | 5       | 1       | 0        | 3       | 2        | 2         | 0         | 0         | 1         | 3         | 0         | Bacteria; Proteobacteria; Alphaproteobacteria; BD7-3                                               |
| Otu2061 | 1       | 0       | 0       | 0        | 1       | 0        | 0         | 0         | 3         | 1         | 3         | 3         | Bacteria; Proteobacteria; Deltaproteobacteria; Myxococcales                                        |
| Otu2060 | 0       | 3       | 0       | 3        | 3       | 1        | 0         | 1         | 1         | 0         | 1         | 0         | Bacteria; Proteobacteria; Gammaproteobacteria; Legionellales; Coxiellaceae                         |
| Otu2063 | 0       | 0       | 0       | 0        | 0       | 3        | 0         | 0         | 0         | 0         | 0         | 0         | Bacteria                                                                                           |
| Otu2062 | 0       | 3       | 1       | 0        | 0       | 0        | 0         | 0         | 0         | 0         | 0         | 0         | Bacteria                                                                                           |
| Otu1994 | 0       | 0       | 0       | 0        | 0       | 5        | 5         | 1         | 2         | 1         | 0         | 5         | Bacteria; Proteobacteria; Gammaproteobacteria; Legionellales; Coxiellaceae                         |

| #OTU ID | Z31DRh1 | Z31DRh2 | Z31DRh3 | Z31DRh4r | Z31DRh5 | Z31DRh6r | Z31J1DRh1 | Z31J1DRh2 | Z31J1DRh3 | Z31J1DRh4 | Z31J1DRh5 | Z31J1DRh6 | taxonomy                                                                                            |
|---------|---------|---------|---------|----------|---------|----------|-----------|-----------|-----------|-----------|-----------|-----------|-----------------------------------------------------------------------------------------------------|
| Otu1995 | 1       | 1       | 1       | 2        | 0       | 6        | 0         | 0         | 1         | 0         | 4         | 0         | Bacteria; Bacteroidetes; Sphingobacteria; Sphingobacteriales                                        |
| Otu1996 | 0       | 1       | 0       | 0        | 0       | 4        | 5         | 0         | 2         | 0         | 0         | 0         | Bacteria; Acidobacteria; Acidobacteria-6; iii1-15; RB40                                             |
| Otu1997 | 0       | 3       | 0       | 0        | 0       | 0        | 0         | 0         | 0         | 0         | 0         | 0         | Bacteria; Bacteroidetes; Sphingobacteria; Sphingobacteriales                                        |
| Otu1990 | 0       | 0       | 0       | 9        | 1       | 0        | 0         | 0         | 0         | 1         | 0         | 0         | Bacteria; Acidobacteria; Acidobacteria-6; CCU21                                                     |
| Otu1991 | 5       | 6       | 3       | 5        | 6       | 7        | 7         | 6         | 1         | 3         | 8         | 0         | Bacteria; Actinobacteria; Acidimicrobia; Acidimicrobiales                                           |
| Otu1992 | 0       | 0       | 0       | 3        | 0       | 0        | 0         | 0         | 0         | 0         | 0         | 0         | Bacteria; Actinobacteria; Actinobacteria; Actinomycetales; Micromonosporaceae                       |
| Otu1993 | 0       | 0       | 0       | 0        | 0       | 0        | 0         | 3         | 0         | 0         | 0         | 0         | Bacteria; Planctomycetes; Planctomycetia; Gemmatales                                                |
| Otu2267 | 0       | 4       | 0       | 0        | 0       | 0        | 0         | 0         | 0         | 0         | 0         | 0         | Bacteria; Chlorobi                                                                                  |
| Otu2266 | 0       | 1       | 0       | 0        | 0       | 1        | 0         | 4         | 1         | 1         | 2         | 0         | Bacteria; Elusimicrobia; Elusimicrobia; FAC88                                                       |
| Otu2265 | 0       | 0       | 0       | 0        | 0       | 0        | 1         | 4         | 0         | 1         | 0         | 0         | Bacteria; Proteobacteria; Gammaproteobacteria; Legionellales                                        |
| Otu2264 | 2       | 3       | 1       | 2        | 2       | 8        | 2         | 2         | 2         | 1         | 1         | 0         | Bacteria; Planctomycetes; Planctomycetia; Gemmatales; Gemmataceae; Gemmata                          |
| Otu1998 | 2       | 1       | 6       | 3        | 5       | 10       | 3         | 6         | 3         | 1         | 3         | 0         | Bacteria; Firmicutes; Clostridia; Clostridiales; Clostridiaceae; Clostridium; Clostridium_butyricum |
| Otu1999 | 3       | 0       | 0       | 0        | 0       | 4        | 0         | 0         | 0         | 0         | 0         | 0         | Bacteria; Proteobacteria; Alphaproteobacteria; BD7-3                                                |
| Otu2261 | 3       | 0       | 2       | 3        | 2       | 2        | 1         | 3         | 4         | 1         | 4         | 3         | Bacteria; Proteobacteria; Gammaproteobacteria; Legionellales; Coxiellaceae; Aquicella               |
| Otu2260 | 0       | 0       | 0       | 0        | 0       | 0        | 0         | 3         | 0         | 0         | 0         | 0         | Bacteria; Proteobacteria; Alphaproteobacteria; Sphingomonadales                                     |
| Otu2791 | 0       | 6       | 4       | 6        | 3       | 2        | 2         | 3         | 1         | 2         | 11        | 1         | Bacteria; Proteobacteria; Alphaproteobacteria                                                       |
| Otu2490 | 0       | 0       | 2       | 0        | 0       | 0        | 4         | 0         | 0         | 0         | 0         | 0         | Bacteria; WPS-2                                                                                     |
| Otu2491 | 0       | 3       | 0       | 0        | 0       | 0        | 5         | 0         | 0         | 0         | 0         | 0         | Bacteria; Acidobacteria; Acidobacteria-6; CCU21                                                     |
| Otu3839 | 0       | 0       | 0       | 0        | 0       | 0        | 0         | 0         | 2         | 0         | 0         | 0         | Bacteria; Proteobacteria; Gammaproteobacteria; Legionellales; Coxiellaceae                          |
| Otu978  | 0       | 17      | 3       | 2        | 19      | 32       | 0         | 2         | 11        | 3         | 46        | 0         | Bacteria; Proteobacteria; Deltaproteobacteria; Desulfuromonadales; Geobacteraceae; Geobacter        |
| Otu4401 | 0       | 3       | 0       | 0        | 0       | 0        | 0         | 0         | 0         | 0         | 0         | 0         | Bacteria; Acidobacteria; Acidobacteria-6; iii1-15                                                   |
| Otu979  | 6       | 5       | 9       | 15       | 8       | 12       | 18        | 7         | 3         | 24        | 18        | 4         | Bacteria; Proteobacteria; Deltaproteobacteria; Myxococcales; Myxococcaceae                          |

| #OTU ID | Z31DRh1 | Z31DRh2 | Z31DRh3 | Z31DRh4r | Z31DRh5 | Z31DRh6r | Z31J1DRh1 | Z31J1DRh2 | Z31J1DRh3 | Z31J1DRh4 | Z31J1DRh5 | Z31J1DRh6 | taxonomy                                                                                            |
|---------|---------|---------|---------|----------|---------|----------|-----------|-----------|-----------|-----------|-----------|-----------|-----------------------------------------------------------------------------------------------------|
| Otu206  | 35      | 48      | 78      | 150      | 28      | 85       | 55        | 105       | 89        | 52        | 97        | 49        | Bacteria; Proteobacteria; Alphaproteobacteria; Caulobacterales; Caulobacteraceae                    |
| Otu208  | 19      | 8       | 21      | 38       | 18      | 70       | 37        | 146       | 96        | 30        | 86        | 15        | Bacteria; Acidobacteria; Acidobacteriia; Acidobacteriales; Koribacteraceae; Candidatus_Koribacter   |
| Otu757  | 27      | 47      | 15      | 28       | 12      | 19       | 25        | 13        | 3         | 30        | 33        | 9         | Bacteria; Proteobacteria; Deltaproteobacteria; Myxococcales; Haliangiaceae                          |
| Otu3912 | 0       | 0       | 3       | 8        | 0       | 0        | 0         | 0         | 0         | 0         | 0         | 0         | Bacteria; TM7; TM7-1                                                                                |
| Otu974  | 5       | 15      | 6       | 3        | 4       | 14       | 9         | 2         | 0         | 6         | 5         | 2         | Bacteria; Acidobacteria; Acidobacteria-6; iii1-15                                                   |
| Otu3910 | 1       | 2       | 0       | 0        | 0       | 0        | 0         | 0         | 0         | 0         | 0         | 0         | Bacteria; Bacteroidetes; Sphingobacteriia; Sphingobacteriales                                       |
| Otu3911 | 0       | 0       | 0       | 0        | 0       | 0        | 0         | 0         | 0         | 0         | 0         | 2         | Bacteria; Proteobacteria; Betaproteobacteria                                                        |
| Otu1527 | 3       | 4       | 1       | 2        | 2       | 3        | 9         | 3         | 2         | 1         | 9         | 1         | Bacteria; Elusimicrobia; Elusimicrobia; MVP-88                                                      |
| Otu3917 | 18      | 3       | 4       | 8        | 4       | 21       | 2         | 5         | 2         | 5         | 11        | 2         | Bacteria; Proteobacteria; Alphaproteobacteria; Sphingomonadales; Sphingomonadaceae                  |
| Otu3914 | 0       | 0       | 0       | 0        | 0       | 0        | 0         | 4         | 0         | 0         | 0         | 0         | Bacteria; Acidobacteria; Chloracidobacteria                                                         |
| Otu207  | 62      | 57      | 85      | 115      | 40      | 49       | 107       | 81        | 73        | 117       | 92        | 53        | Bacteria; Proteobacteria; Alphaproteobacteria; Sphingomonadales; Sphingomonadaceae; Kaistobacter    |
| Otu4400 | 0       | 0       | 0       | 0        | 0       | 4        | 0         | 0         | 0         | 1         | 1         | 0         | Bacteria; Acidobacteria; Acidobacteriia; Acidobacteriales; Koribacteraceae                          |
| Otu3918 | 2       | 0       | 0       | 0        | 0       | 0        | 0         | 0         | 0         | 0         | 0         | 0         | Bacteria; Proteobacteria; Gammaproteobacteria; Legionellales                                        |
| Otu3919 | 2       | 0       | 0       | 0        | 0       | 2        | 0         | 0         | 0         | 0         | 0         | 0         | Bacteria; Proteobacteria; Alphaproteobacteria; Rickettsiales; mitochondria                          |
| Otu204  | 59      | 84      | 14      | 33       | 33      | 58       | 2         | 15        | 137       | 14        | 49        | 89        | Bacteria; Bacteroidetes; Cytophagia; Cytophagales; Cytophagaceae                                    |
| Otu205  | 194     | 89      | 74      | 296      | 177     | 303      | 102       | 56        | 125       | 112       | 56        | 149       | Bacteria; Proteobacteria; Betaproteobacteria; Burkholderiales; Comamonadaceae                       |
| Otu202  | 80      | 21      | 32      | 69       | 28      | 210      | 40        | 25        | 28        | 24        | 9         | 47        | Bacteria; Actinobacteria; Actinobacteria; Actinomycetales; Mycobacteriaceae; Mycobacterium          |
| Otu203  | 118     | 53      | 154     | 336      | 53      | 152      | 128       | 68        | 110       | 72        | 43        | 136       | Bacteria; Proteobacteria; Betaproteobacteria; Burkholderiales; Comamonadaceae                       |
| Otu14   | 560     | 167     | 1099    | 789      | 228     | 213      | 155       | 214       | 302       | 104       | 59        | 540       | Bacteria; Verrucomicrobia; Spartobacteria; Chthoniobacteriales; Chthoniobacteraceae; Chthoniobacter |
| Otu15   | 429     | 513     | 565     | 734      | 421     | 1446     | 733       | 1000      | 635       | 618       | 835       | 387       | Bacteria; Planctomycetes; Phycisphaerae; WD2101                                                     |
| Otu16   | 160     | 3       | 1       | 1        | 27      | 1180     | 4         | 0         | 32        | 1         | 1         | 2         | Bacteria; Cyanobacteria; Oscillatoriophyceae; Oscillatoriales; Phormidiaceae; Phormidium            |
| Otu17   | 61      | 58      | 110     | 259      | 88      | 195      | 151       | 386       | 1051      | 235       | 318       | 470       | Bacteria; Bacteroidetes; Cytophagia; Cytophagales; Cytophagaceae                                    |

| #OTU ID | Z31DRh1 | Z31DRh2 | Z31DRh3 | Z31DRh4r | Z31DRh5 | Z31DRh6r | Z31J1DRh1 | Z31J1DRh2 | Z31J1DRh3 | Z31J1DRh4 | Z31J1DRh5 | Z31J1DRh6 | taxonomy                                                                                            |
|---------|---------|---------|---------|----------|---------|----------|-----------|-----------|-----------|-----------|-----------|-----------|-----------------------------------------------------------------------------------------------------|
| Otu10   | 1460    | 17      | 54      | 210      | 1042    | 104      | 123       | 39        | 14        | 12        | 8         | 146       | Bacteria; Bacteroidetes; Flavobacteria; Flavobacteriales; Weeksellaceae; Chryseobacterium           |
| Otu200  | 23      | 99      | 35      | 46       | 42      | 41       | 41        | 32        | 14        | 61        | 68        | 13        | Bacteria; Proteobacteria; Deltaproteobacteria; Syntrophobacterales; Syntrophobacteraceae            |
| Otu12   | 233     | 108     | 210     | 1533     | 242     | 512      | 368       | 98        | 162       | 142       | 19        | 425       | Bacteria; Bacteroidetes; Sphingobacteria; Sphingobacteriales; Sphingobacteriaceae                   |
| Otu13   | 4       | 1       | 34      | 116      | 8       | 76       | 17        | 1271      | 434       | 77        | 115       | 253       | Bacteria; Bacteroidetes; Cytophagia; Cytophagales; Cytophagaceae                                    |
| Otu1509 | 1       | 0       | 0       | 5        | 1       | 1        | 0         | 1         | 0         | 0         | 1         | 0         | Bacteria; Proteobacteria                                                                            |
| Otu973  | 9       | 2       | 3       | 16       | 2       | 12       | 10        | 3         | 14        | 17        | 3         | 1         | Bacteria; Chloroflexi; Anaerolineae; SBR1031; oc28                                                  |
| Otu18   | 37      | 0       | 120     | 902      | 130     | 94       | 2         | 8         | 4         | 37        | 6         | 88        | Bacteria; Proteobacteria; Alphaproteobacteria; Sphingomonadales; Sphingomonadaceae; Novosphingobium |
| Otu19   | 94      | 60      | 181     | 973      | 70      | 107      | 21        | 22        | 158       | 40        | 19        | 25        | Bacteria; Bacteroidetes; Saprospirae; Saprospirales; Chitinophagaceae                               |
| Otu2087 | 0       | 0       | 4       | 0        | 1       | 6        | 0         | 0         | 0         | 0         | 3         | 3         | Bacteria; Chloroflexi; Ktedonobacteria; Ktedonobacterales; Ktedonobacteraceae                       |
| Otu2086 | 3       | 3       | 4       | 6        | 8       | 15       | 2         | 8         | 10        | 2         | 4         | 3         | Bacteria; Actinobacteria; Actinobacteria; Actinomycetales; Frankiaceae                              |
| Otu2085 | 5       | 6       | 3       | 3        | 2       | 5        | 5         | 0         | 1         | 1         | 3         | 0         | Bacteria; Chloroflexi; Chloroflexi; Roseiflexales; Kouleothrixaceae                                 |
| Otu2084 | 2       | 1       | 0       | 1        | 2       | 3        | 0         | 1         | 1         | 2         | 0         | 0         | Bacteria; FBP                                                                                       |
| Otu2083 | 0       | 0       | 0       | 0        | 0       | 1        | 0         | 0         | 0         | 0         | 4         | 0         | Bacteria; Verrucomicrobia; Spartobacteria; Chthoniobacterales; Chthoniobacteraceae                  |
| Otu2082 | 0       | 0       | 0       | 1        | 0       | 4        | 1         | 0         | 1         | 0         | 0         | 0         | Bacteria; Proteobacteria; Deltaproteobacteria                                                       |
| Otu2081 | 0       | 5       | 1       | 0        | 4       | 2        | 1         | 0         | 0         | 4         | 0         | 0         | Bacteria; Acidobacteria; Acidobacteria-6; iii1-15                                                   |
| Otu2080 | 0       | 0       | 0       | 0        | 0       | 3        | 0         | 0         | 0         | 0         | 2         | 0         | Bacteria; Proteobacteria; Deltaproteobacteria; Myxococcales                                         |
| Otu2089 | 0       | 0       | 1       | 3        | 0       | 1        | 1         | 0         | 0         | 6         | 0         | 0         | Bacteria; Proteobacteria; Deltaproteobacteria; Bdellovibrionales; Bdellovibrionaceae; Bdellovibrio  |
| Otu2088 | 0       | 13      | 3       | 3        | 1       | 0        | 1         | 0         | 0         | 2         | 1         | 0         | Bacteria; Armatimonadetes; Chthonomonadetes; Chthonomonadales; Chthonomonadaceae                    |





| group   | shared OTU_number/ unique OTU_number | OTU_ID                                                                                                                                                                                                                                                                                                                                                                                                                                                                                                                                                                                                                                                                                                                                                                                                                                                                                                                                                                                                                                                                                                                                                                                                                                                                                                                                                                                                                                                                                                                                                                                                                                                                                                                                                                                                                                                                                                                                                                                                                                                                                                                                                                                                                                                                                                                                                                                                                                                                                                                                                                                                                                                                                                                                                                                                                                                                                                                                                                                                                                                                                                                                                                                                                                                                                                                      |
|---------|--------------------------------------|-----------------------------------------------------------------------------------------------------------------------------------------------------------------------------------------------------------------------------------------------------------------------------------------------------------------------------------------------------------------------------------------------------------------------------------------------------------------------------------------------------------------------------------------------------------------------------------------------------------------------------------------------------------------------------------------------------------------------------------------------------------------------------------------------------------------------------------------------------------------------------------------------------------------------------------------------------------------------------------------------------------------------------------------------------------------------------------------------------------------------------------------------------------------------------------------------------------------------------------------------------------------------------------------------------------------------------------------------------------------------------------------------------------------------------------------------------------------------------------------------------------------------------------------------------------------------------------------------------------------------------------------------------------------------------------------------------------------------------------------------------------------------------------------------------------------------------------------------------------------------------------------------------------------------------------------------------------------------------------------------------------------------------------------------------------------------------------------------------------------------------------------------------------------------------------------------------------------------------------------------------------------------------------------------------------------------------------------------------------------------------------------------------------------------------------------------------------------------------------------------------------------------------------------------------------------------------------------------------------------------------------------------------------------------------------------------------------------------------------------------------------------------------------------------------------------------------------------------------------------------------------------------------------------------------------------------------------------------------------------------------------------------------------------------------------------------------------------------------------------------------------------------------------------------------------------------------------------------------------------------------------------------------------------------------------------------------|
| Z111086 | 393                                  | <p>Otu1068,Otu1077,Otu1131,Otu1156,Otu1193,Otu1247,Otu1311,Otu1323,Otu1356,Otu1365,Otu1405,Otu1456,Otu1465,Otu1491,Otu1512,Otu1586,Otu1600,Otu1654,Otu1666,Otu1709,Otu1734,Otu1766,Otu1775,Otu1787,Otu1843,Otu1861,Otu1893,Otu1945,Otu1946,Otu1965,Otu1972,Otu1993,Otu2015,Otu2038,Otu2042,Otu2051,Otu2073,Otu2079,Otu2092,Otu2094,Otu2136,Otu2141,Otu2146,Otu2153,Otu2174,Otu2191,Otu2211,Otu2212,Otu2242,Otu2249,Otu2252,Otu2260,Otu2265,Otu2273,Otu2283,Otu2300,Otu2330,Otu2339,Otu2346,Otu2381,Otu2386,Otu2391,Otu2392,Otu2404,Otu2426,Otu2434,Otu2455,Otu2462,Otu2470,Otu2486,Otu2492,Otu2515,Otu2521,Otu2528,Otu2533,Otu2540,Otu2560,Otu2576,Otu2578,Otu2579,Otu2582,Otu2606,Otu2608,Otu2613,Otu2614,Otu2618,Otu2620,Otu2626,Otu2627,Otu2629,Otu2631,Otu2633,Otu2642,Otu2643,Otu2646,Otu2651,Otu2652,Otu2654,Otu2655,Otu2658,Otu2662,Otu2676,Otu2684,Otu2691,Otu2694,Otu2698,Otu2699,Otu2706,Otu2707,Otu2716,Otu2732,Otu2734,Otu2738,Otu2748,Otu2770,Otu2773,Otu2775,Otu2777,Otu2783,Otu2797,Otu2798,Otu2806,Otu2823,Otu2826,Otu2833,Otu2842,Otu2848,Otu2849,Otu2858,Otu2863,Otu2872,Otu2884,Otu2887,Otu2900,Otu2902,Otu2906,Otu2911,Otu2933,Otu2935,Otu2947,Otu2949,Otu2953,Otu2961,Otu2965,Otu2969,Otu2972,Otu2974,Otu2980,Otu2984,Otu2985,Otu2986,Otu2989,Otu2991,Otu2992,Otu3006,Otu3018,Otu3019,Otu3020,Otu3027,Otu3036,Otu3045,Otu3062,Otu3063,Otu3087,Otu3090,Otu3091,Otu3099,Otu3101,Otu3124,Otu3126,Otu3137,Otu3138,Otu3143,Otu3145,Otu3147,Otu3155,Otu3157,Otu3162,Otu3163,Otu3165,Otu3167,Otu3171,Otu3178,Otu3180,Otu3188,Otu3191,Otu3196,Otu3209,Otu3217,Otu3221,Otu3228,Otu3229,Otu3234,Otu3236,Otu3242,Otu3246,Otu3262,Otu3265,Otu3266,Otu3267,Otu3275,Otu3283,Otu3291,Otu3300,Otu3307,Otu3308,Otu3309,Otu3310,Otu3312,Otu3313,Otu3314,Otu3315,Otu3317,Otu3318,Otu3323,Otu3337,Otu3346,Otu3352,Otu3358,Otu3360,Otu3365,Otu3367,Otu3370,Otu3372,Otu3390,Otu3396,Otu3399,Otu3421,Otu3427,Otu3433,Otu3440,Otu3449,Otu3452,Otu3456,Otu3462,Otu3472,Otu3489,Otu3503,Otu3514,Otu3520,Otu3521,Otu3523,Otu3533,Otu3535,Otu3543,Otu3545,Otu3567,Otu3569,Otu3572,Otu3580,Otu3586,Otu3591,Otu3592,Otu3593,Otu3605,Otu3606,Otu3608,Otu3610,Otu3613,Otu3620,Otu3621,Otu3622,Otu3623,Otu3635,Otu3652,Otu3658,Otu3668,Otu3669,Otu3683,Otu3685,Otu3691,Otu3692,Otu3696,Otu3705,Otu3706,Otu3709,Otu3728,Otu3734,Otu3736,Otu3738,Otu3741,Otu3742,Otu3747,Otu3750,Otu3767,Otu3769,Otu3777,Otu3784,Otu3786,Otu3813,Otu3818,Otu3831,Otu3839,Otu3841,Otu3845,Otu3846,Otu3861,Otu3869,Otu3875,Otu3876,Otu3887,Otu3890,Otu3897,Otu3898,Otu3908,Otu3909,Otu3911,Otu3914,Otu3920,Otu3924,Otu3926,Otu3928,Otu3933,Otu3937,Otu3940,Otu3957,Otu3958,Otu3961,Otu3964,Otu3972,Otu3973,Otu3975,Otu3983,Otu3994,Otu3998,Otu4000,Otu4002,Otu4005,Otu4011,Otu4012,Otu4019,Otu4022,Otu4031,Otu4032,Otu4044,Otu4053,Otu4056,Otu4060,Otu4073,Otu4080,Otu4092,Otu4099,Otu4100,Otu4101,Otu4106,Otu4115,Otu4122,Otu4131,Otu4152,Otu4171,Otu4180,Otu4184,Otu4187,Otu4193,Otu4199,Otu4200,Otu4201,Otu4206,Otu4208,Otu4215,Otu4229,Otu4236,Otu4255,Otu4263,Otu4276,Otu4277,Otu4286,Otu4287,Otu4297,Otu4299,Otu4301,Otu4302,Otu4303,Otu4306,Otu4307,Otu4309,Otu4310,Otu4311,Otu4317,Otu4319,Otu4344,Otu4350,Otu4355,Otu4368,Otu4372,Otu4380,Otu4382,Otu4389,Otu4404,Otu4419,Otu4425,Otu4427,Otu4432,Otu4434,Otu4437,Otu4438,Otu4440,Otu61,Otu694</p> |

Table S4. OTU\_table\_for\_biom of Z31DSO &amp; Z31J1DSO(16S)

| # Construct |          |         |         |         |         |         |           |           |           |           |           |           |                                                                                                                  |
|-------------|----------|---------|---------|---------|---------|---------|-----------|-----------|-----------|-----------|-----------|-----------|------------------------------------------------------------------------------------------------------------------|
| #OTU ID     | Z31DSO1r | Z31DSO2 | Z31DSO3 | Z31DSO4 | Z31DSO5 | Z31DSO6 | Z31J1DSO1 | Z31J1DSO2 | Z31J1DSO3 | Z31J1DSO4 | Z31J1DSO5 | Z31J1DSO6 | taxonomy                                                                                                         |
| Otu3439     | 1        | 0       | 0       | 3       | 0       | 0       | 0         | 0         | 1         | 0         | 0         | 1         | Bacteria; Verrucomicrobia; Spartobacteria; Chthoniobacterales; Chthoniobacteraceae                               |
| Otu3438     | 0        | 0       | 0       | 0       | 0       | 0       | 0         | 0         | 0         | 0         | 2         | 0         | Bacteria; Planctomycetes; Phycisphaerae; Phycisphaerales                                                         |
| Otu1219     | 5        | 3       | 3       | 4       | 11      | 0       | 5         | 2         | 3         | 1         | 8         | 2         | Bacteria; Actinobacteria; Rubrobacteria; Rubrobacterales; Rubrobacteraceae; Rubrobacter                          |
| Otu1218     | 3        | 2       | 0       | 10      | 1       | 7       | 6         | 0         | 0         | 8         | 5         | 4         | Bacteria; Cyanobacteria; Chloroplast; Stramenopiles                                                              |
| Otu1217     | 2        | 5       | 4       | 4       | 0       | 2       | 0         | 1         | 1         | 5         | 7         | 0         | Bacteria; Bacteroidetes; Cytophagia; Cytophagales; Cytophagaceae                                                 |
| Otu1216     | 10       | 1       | 0       | 1       | 4       | 1       | 0         | 0         | 0         | 0         | 1         | 2         | Bacteria; Acidobacteria; Acidobacteria-6; iii1-15; mb2424                                                        |
| Otu1215     | 6        | 2       | 3       | 14      | 0       | 8       | 9         | 10        | 16        | 9         | 4         | 3         | Bacteria; Proteobacteria; Deltaproteobacteria; Myxococcales                                                      |
| Otu1214     | 1        | 0       | 0       | 3       | 1       | 3       | 2         | 1         | 5         | 6         | 5         | 6         | Bacteria; Elusimicrobia; Elusimicrobia; IIb                                                                      |
| Otu1213     | 6        | 6       | 7       | 3       | 1       | 3       | 7         | 1         | 1         | 8         | 5         | 0         | Bacteria; Chloroflexi; S085                                                                                      |
| Otu1212     | 10       | 0       | 1       | 4       | 1       | 1       | 2         | 0         | 0         | 2         | 5         | 0         | Bacteria; Gemmatimonadetes; Gemmatimonadetes; Gemmatimonadales; Ellin5301                                        |
| Otu1211     | 5        | 1       | 0       | 5       | 1       | 3       | 3         | 2         | 6         | 3         | 2         | 6         | Bacteria; Proteobacteria; Deltaproteobacteria; Bdellovibrionales; Bdellovibrionaceae; Bdellovibrio               |
| Otu1210     | 0        | 0       | 0       | 6       | 0       | 1       | 2         | 1         | 2         | 6         | 3         | 2         | Bacteria; Chlamydiae; Chlamydia; Chlamydiales; Rhabdochlamydiaceae; Candidatus_Rhabdochlamydia                   |
| Otu2889     | 2        | 0       | 2       | 0       | 1       | 0       | 0         | 0         | 0         | 1         | 1         | 1         | Bacteria; Planctomycetes; Planctomycetia; Pirellulales; Pirellulaceae                                            |
| Otu2888     | 2        | 0       | 0       | 0       | 0       | 1       | 2         | 5         | 2         | 0         | 1         | 1         | Bacteria; Actinobacteria; Acidimicrobia; Acidimicrobiales                                                        |
| Otu2887     | 2        | 0       | 0       | 0       | 0       | 0       | 0         | 0         | 0         | 0         | 0         | 0         | Bacteria; Verrucomicrobia; Spartobacteria; Chthoniobacterales; Chthoniobacteraceae; Candidatus_Xiphinematobacter |
| Otu2886     | 2        | 0       | 0       | 0       | 0       | 0       | 0         | 0         | 0         | 0         | 0         | 0         | Bacteria                                                                                                         |
| Otu2885     | 1        | 0       | 1       | 0       | 2       | 0       | 0         | 0         | 0         | 0         | 0         | 0         | Bacteria; Chloroflexi; Anaerolineae; CFB-26                                                                      |
| Otu2884     | 6        | 5       | 0       | 0       | 1       | 1       | 0         | 0         | 0         | 1         | 2         | 0         | Bacteria; Acidobacteria; Acidobacteria-6; iii1-15                                                                |
| Otu2883     | 0        | 0       | 1       | 0       | 0       | 0       | 0         | 0         | 0         | 0         | 0         | 2         | Bacteria; Chlamydiae; Chlamydia; Chlamydiales                                                                    |
| Otu2882     | 3        | 2       | 1       | 1       | 0       | 0       | 1         | 2         | 1         | 0         | 4         | 0         | Bacteria; BRC1; PRR-11                                                                                           |

| #OTU ID | Z31DSO1r | Z31DSO2 | Z31DSO3 | Z31DSO4 | Z31DSO5 | Z31DSO6 | Z31JDSO1 | Z31JDSO2 | Z31JDSO3 | Z31JDSO4 | Z31JDSO5 | Z31JDSO6 | taxonomy                                                                                                                     |
|---------|----------|---------|---------|---------|---------|---------|----------|----------|----------|----------|----------|----------|------------------------------------------------------------------------------------------------------------------------------|
| Otu2881 | 0        | 0       | 2       | 0       | 1       | 0       | 3        | 0        | 2        | 0        | 1        | 2        | Bacteria; Proteobacteria; Alphaproteobacteria                                                                                |
| Otu2880 | 0        | 0       | 0       | 0       | 0       | 0       | 0        | 2        | 0        | 0        | 0        | 0        | Bacteria                                                                                                                     |
| Otu3431 | 10       | 6       | 5       | 5       | 7       | 3       | 2        | 0        | 9        | 9        | 4        | 2        | Bacteria; Proteobacteria; Deltaproteobacteria; Myxococcales; Haliangiaceae                                                   |
| Otu2799 | 0        | 0       | 0       | 1       | 0       | 3       | 0        | 1        | 2        | 0        | 0        | 0        | Bacteria                                                                                                                     |
| Otu3430 | 3        | 0       | 1       | 0       | 1       | 0       | 0        | 2        | 2        | 2        | 1        | 0        | Bacteria; Armatimonadetes; OPB50                                                                                             |
| Otu2798 | 0        | 0       | 0       | 2       | 0       | 0       | 0        | 0        | 0        | 0        | 2        | 0        | Bacteria; Chloroflexi                                                                                                        |
| Otu3418 | 2        | 0       | 0       | 1       | 0       | 2       | 2        | 0        | 0        | 0        | 2        | 0        | Bacteria; Proteobacteria; Gammaproteobacteria; Legionellales                                                                 |
| Otu1329 | 0        | 2       | 1       | 3       | 6       | 0       | 8        | 1        | 6        | 1        | 1        | 0        | Bacteria; Proteobacteria; Gammaproteobacteria; Legionellales; Coxiellaceae; Aquicella                                        |
| Otu1328 | 3        | 1       | 4       | 0       | 0       | 4       | 2        | 0        | 1        | 14       | 2        | 2        | Bacteria; Cyanobacteria; 4C0d-2; SM1D11                                                                                      |
| Otu1323 | 5        | 4       | 1       | 6       | 4       | 6       | 2        | 5        | 6        | 7        | 1        | 7        | Bacteria; Elusimicrobia; Elusimicrobia; I1b                                                                                  |
| Otu1322 | 5        | 1       | 4       | 5       | 3       | 0       | 6        | 0        | 1        | 6        | 11       | 3        | Bacteria                                                                                                                     |
| Otu1321 | 1        | 1       | 4       | 0       | 3       | 0       | 1        | 0        | 1        | 5        | 1        | 1        | Bacteria; Proteobacteria; Alphaproteobacteria; Caulobacterales; Caulobacteraceae; Asticcacaulis; Asticcacaulis_biprosthecium |
| Otu1320 | 1        | 1       | 3       | 3       | 2       | 2       | 6        | 0        | 0        | 1        | 2        | 1        | Bacteria; Proteobacteria; Alphaproteobacteria; Rhodospirillales; Rhodospirillaceae                                           |
| Otu1327 | 5        | 5       | 1       | 0       | 5       | 1       | 0        | 2        | 1        | 2        | 4        | 2        | Bacteria; Nitrospirae; Nitrospira; Nitrospirales; Nitrospiraceae; JG37-AG-70                                                 |
| Otu1326 | 6        | 6       | 6       | 15      | 7       | 9       | 26       | 6        | 20       | 11       | 22       | 8        | Bacteria; Actinobacteria; Thermoleophilia; Gaiellales; Gaiellaceae                                                           |
| Otu1325 | 3        | 3       | 11      | 0       | 2       | 0       | 2        | 4        | 0        | 1        | 7        | 0        | Bacteria; Acidobacteria; Acidobacteria-6; iii1-15; RB40                                                                      |
| Otu1324 | 7        | 0       | 1       | 2       | 0       | 2       | 0        | 1        | 0        | 0        | 0        | 0        | Bacteria; Planctomycetes; Phycisphaerae; Phycisphaerales                                                                     |
| Otu318  | 68       | 24      | 23      | 28      | 22      | 17      | 64       | 31       | 22       | 33       | 46       | 31       | Bacteria; Planctomycetes; Planctomycetia; Pirellulales; Pirellulaceae; Pirellula                                             |
| Otu319  | 30       | 1       | 9       | 21      | 0       | 1       | 21       | 30       | 1        | 0        | 0        | 0        | Bacteria; Proteobacteria; Gammaproteobacteria; Legionellales                                                                 |
| Otu2661 | 0        | 0       | 0       | 1       | 1       | 1       | 0        | 0        | 0        | 1        | 2        | 0        | Bacteria; Bacteroidetes; Saprospirae; Saprospirales; Chitinophagaceae                                                        |
| Otu2660 | 0        | 0       | 0       | 0       | 2       | 0       | 0        | 0        | 0        | 0        | 0        | 0        | Bacteria; Proteobacteria; Deltaproteobacteria; MIZ46                                                                         |
| Otu2667 | 0        | 0       | 1       | 1       | 0       | 2       | 1        | 1        | 0        | 0        | 0        | 0        | Bacteria; Proteobacteria; Alphaproteobacteria; Rickettsiales                                                                 |

| #OTU ID | Z31DSO1r | Z31DSO2 | Z31DSO3 | Z31DSO4 | Z31DSO5 | Z31DSO6 | Z31JDSO1 | Z31JDSO2 | Z31JDSO3 | Z31JDSO4 | Z31JDSO5 | Z31JDSO6 | taxonomy                                                                                      |
|---------|----------|---------|---------|---------|---------|---------|----------|----------|----------|----------|----------|----------|-----------------------------------------------------------------------------------------------|
| Otu2666 | 1        | 1       | 1       | 6       | 2       | 0       | 2        | 2        | 0        | 3        | 2        | 3        | Bacteria; Planctomycetes; Phycisphaerae; WD2101                                               |
| Otu2665 | 2        | 0       | 0       | 0       | 0       | 0       | 0        | 0        | 1        | 0        | 1        | 0        | Bacteria; Proteobacteria; Deltaproteobacteria; Spirobaeciales                                 |
| Otu2664 | 1        | 1       | 0       | 0       | 1       | 0       | 0        | 0        | 0        | 0        | 2        | 0        | Bacteria; Actinobacteria; Acidimicrobia; Acidimicrobiales; EB1017                             |
| Otu310  | 26       | 36      | 15      | 30      | 42      | 14      | 15       | 11       | 12       | 27       | 39       | 17       | Bacteria; Chloroflexi; Anaerolineae; SBR1031; oc28                                            |
| Otu311  | 50       | 32      | 49      | 44      | 36      | 52      | 41       | 16       | 31       | 33       | 88       | 14       | Bacteria; Chloroflexi; Chloroflexi; Roseiflexales; Kouleothrixaceae                           |
| Otu312  | 3        | 5       | 6       | 36      | 4       | 7       | 18       | 22       | 24       | 19       | 15       | 27       | Bacteria; Gemmatimonadetes; Gemmatimonadetes; Ellin5290                                       |
| Otu313  | 75       | 14      | 13      | 18      | 29      | 4       | 3        | 6        | 5        | 24       | 26       | 18       | Bacteria; Acidobacteria; Chloracidobacteria; PK29                                             |
| Otu314  | 0        | 0       | 0       | 1       | 4       | 40      | 0        | 0        | 3        | 0        | 1        | 1        | Bacteria; Chloroflexi; Anaerolineae; SBR1031; oc28                                            |
| Otu315  | 25       | 15      | 24      | 21      | 7       | 18      | 57       | 15       | 24       | 11       | 49       | 8        | Bacteria; Actinobacteria; Actinobacteria; Actinomycetales; Geodermatophilaceae                |
| Otu316  | 145      | 42      | 48      | 94      | 36      | 84      | 81       | 121      | 148      | 110      | 79       | 102      | Bacteria; Acidobacteria; Solibacteres; Solibacterales; Solibacteraceae; Candidatus_Solibacter |
| Otu317  | 17       | 17      | 14      | 24      | 8       | 35      | 31       | 19       | 28       | 11       | 12       | 8        | Bacteria; Bacteroidetes; Sphingobacteriia; Sphingobacteriales                                 |
| Otu3093 | 0        | 0       | 1       | 2       | 0       | 0       | 1        | 1        | 1        | 1        | 0        | 0        | Bacteria; Actinobacteria; Acidimicrobia; Acidimicrobiales                                     |
| Otu3203 | 0        | 0       | 1       | 3       | 1       | 0       | 0        | 0        | 1        | 1        | 2        | 0        | Bacteria; Actinobacteria; Thermoleophilia; Solirubrobacterales                                |
| Otu338  | 0        | 0       | 0       | 0       | 0       | 0       | 0        | 0        | 0        | 0        | 0        | 40       | Bacteria; Bacteroidetes; Saprospirae; Saprospirales; Chitinophagaceae                         |
| Otu798  | 5        | 13      | 8       | 4       | 6       | 0       | 0        | 2        | 7        | 3        | 7        | 5        | Bacteria; Proteobacteria; Deltaproteobacteria; Myxococcales; Myxococcaceae; Anaeromyxobacter  |
| Otu799  | 7        | 1       | 5       | 11      | 2       | 3       | 4        | 2        | 3        | 12       | 1        | 7        | Bacteria; Bacteroidetes; Saprospirae; Saprospirales; Chitinophagaceae                         |
| Otu794  | 96       | 56      | 39      | 60      | 44      | 18      | 59       | 39       | 39       | 61       | 96       | 42       | Bacteria; Gemmatimonadetes; Gemmatimonadetes; Gemmatimonadales; Ellin5301                     |
| Otu795  | 15       | 7       | 6       | 4       | 3       | 2       | 2        | 1        | 3        | 1        | 8        | 0        | Bacteria; Chloroflexi; Anaerolineae; envOPS12                                                 |
| Otu796  | 0        | 13      | 0       | 3       | 8       | 0       | 0        | 1        | 5        | 1        | 0        | 1        | Bacteria; TM6; SJA-4                                                                          |
| Otu797  | 4        | 4       | 21      | 11      | 17      | 10      | 14       | 9        | 14       | 9        | 26       | 1        | Bacteria; Tenericutes; Mollicutes; Anaeroplasmatales; Anaeroplasmataceae; Asteroleplasma      |
| Otu790  | 0        | 1       | 5       | 11      | 0       | 0       | 13       | 6        | 10       | 0        | 4        | 9        | Bacteria; Proteobacteria; Gammaproteobacteria; Legionellales; Coxiellaceae; Aquicella         |
| Otu791  | 14       | 4       | 12      | 19      | 3       | 6       | 16       | 11       | 16       | 6        | 12       | 7        | Bacteria; Planctomycetes; Phycisphaerae; WD2101                                               |

| #OTU ID | Z31DSO1r | Z31DSO2 | Z31DSO3 | Z31DSO4 | Z31DSO5 | Z31DSO6 | Z31JDSO1 | Z31JDSO2 | Z31JDSO3 | Z31JDSO4 | Z31JDSO5 | Z31JDSO6 | taxonomy                                                                                         |
|---------|----------|---------|---------|---------|---------|---------|----------|----------|----------|----------|----------|----------|--------------------------------------------------------------------------------------------------|
| Otu792  | 1        | 0       | 3       | 9       | 7       | 5       | 12       | 1        | 6        | 4        | 5        | 1        | Bacteria; Proteobacteria; Gammaproteobacteria; Legionellales; Coxiellaceae                       |
| Otu793  | 13       | 0       | 0       | 1       | 1       | 2       | 2        | 1        | 3        | 2        | 8        | 2        | Bacteria; Planctomycetes; Planctomycetia; Pirellulales; Pirellulaceae                            |
| Otu1037 | 1        | 3       | 6       | 10      | 5       | 8       | 9        | 3        | 3        | 3        | 10       | 2        | Bacteria; Chloroflexi; C0119                                                                     |
| Otu1036 | 12       | 6       | 13      | 4       | 5       | 7       | 10       | 0        | 5        | 3        | 22       | 3        | Bacteria; Chloroflexi; Ellin6529                                                                 |
| Otu1035 | 2        | 0       | 1       | 0       | 0       | 2       | 1        | 2        | 9        | 1        | 1        | 2        | Bacteria; Acidobacteria; Chloracidobacteria                                                      |
| Otu1034 | 10       | 2       | 7       | 11      | 3       | 3       | 3        | 7        | 3        | 8        | 7        | 5        | Bacteria; Verrucomicrobia; Pedosphaerae; Pedosphaerales; Ellin517                                |
| Otu1033 | 0        | 1       | 3       | 2       | 10      | 0       | 8        | 1        | 0        | 1        | 0        | 1        | Bacteria; Proteobacteria; Alphaproteobacteria; Sphingomonadales; Sphingomonadaceae; Sphingobium  |
| Otu1032 | 10       | 12      | 15      | 13      | 9       | 10      | 20       | 12       | 10       | 7        | 31       | 10       | Bacteria; Actinobacteria; Thermoleophilia; Gaiellales; Gaiellaceae                               |
| Otu558  | 16       | 16      | 15      | 65      | 19      | 55      | 24       | 65       | 56       | 28       | 32       | 13       | Bacteria; Chloroflexi; Anaerolineae; SBR1031                                                     |
| Otu559  | 27       | 5       | 11      | 12      | 6       | 30      | 19       | 14       | 16       | 18       | 16       | 12       | Bacteria; Planctomycetes; Planctomycetia; Pirellulales; Pirellulaceae; Pirellula                 |
| Otu556  | 45       | 60      | 75      | 112     | 52      | 98      | 57       | 74       | 80       | 64       | 78       | 79       | Bacteria; Verrucomicrobia; Pedosphaerae; Pedosphaerales; Ellin515                                |
| Otu557  | 8        | 5       | 37      | 23      | 12      | 8       | 49       | 14       | 3        | 5        | 4        | 22       | Bacteria; Actinobacteria; Actinobacteria; Actinomycetales; Micrococcaceae                        |
| Otu554  | 26       | 30      | 40      | 28      | 26      | 38      | 31       | 25       | 39       | 21       | 41       | 19       | Bacteria; Actinobacteria; Actinobacteria; Actinomycetales; Micromonosporaceae; Dactylosporangium |
| Otu555  | 5        | 2       | 5       | 19      | 12      | 4       | 10       | 5        | 15       | 11       | 5        | 7        | Bacteria; Proteobacteria; Gammaproteobacteria; Legionellales; Coxiellaceae; Aquicella            |
| Otu552  | 1        | 2       | 6       | 11      | 2       | 6       | 0        | 5        | 26       | 4        | 2        | 2        | Bacteria; Proteobacteria; Deltaproteobacteria; Myxococcales                                      |
| Otu553  | 2        | 3       | 12      | 15      | 2       | 6       | 12       | 9        | 14       | 7        | 16       | 8        | Bacteria                                                                                         |
| Otu550  | 48       | 8       | 10      | 10      | 3       | 4       | 4        | 0        | 4        | 10       | 14       | 1        | Bacteria; Planctomycetes; Pla4                                                                   |
| Otu551  | 16       | 5       | 11      | 15      | 6       | 0       | 13       | 0        | 0        | 5        | 16       | 1        | Bacteria; Gemmatimonadetes; Gemmatimonadetes                                                     |
| Otu776  | 1        | 1       | 5       | 11      | 2       | 4       | 3        | 10       | 14       | 4        | 4        | 7        | Bacteria; Proteobacteria                                                                         |
| Otu777  | 1        | 2       | 9       | 4       | 2       | 1       | 2        | 2        | 0        | 0        | 1        | 1        | Bacteria; Proteobacteria; Deltaproteobacteria; Myxococcales; 0319-6G20                           |
| Otu774  | 14       | 8       | 2       | 11      | 9       | 12      | 5        | 4        | 10       | 6        | 14       | 3        | Bacteria; Actinobacteria; Acidimicrobia; Acidimicrobiales                                        |
| Otu775  | 9        | 9       | 7       | 6       | 11      | 8       | 2        | 2        | 1        | 3        | 12       | 3        | Bacteria; Chloroflexi; Anaerolineae; SBR1031; A4b                                                |

| #OTU ID | Z31DSO1r | Z31DSO2 | Z31DSO3 | Z31DSO4 | Z31DSO5 | Z31DSO6 | Z31J1DSO1 | Z31J1DSO2 | Z31J1DSO3 | Z31J1DSO4 | Z31J1DSO5 | Z31J1DSO6 | taxonomy                                                                                                          |
|---------|----------|---------|---------|---------|---------|---------|-----------|-----------|-----------|-----------|-----------|-----------|-------------------------------------------------------------------------------------------------------------------|
| Otu772  | 10       | 3       | 7       | 10      | 4       | 14      | 19        | 11        | 19        | 10        | 3         | 8         | Bacteria; Proteobacteria; Betaproteobacteria; Burkholderiales; Oxalobacteraceae; Janthinobacterium                |
| Otu773  | 52       | 32      | 23      | 29      | 12      | 6       | 55        | 21        | 15        | 23        | 26        | 17        | Bacteria; Planctomycetes; Phycisphaerae; WD2101                                                                   |
| Otu954  | 1        | 0       | 10      | 8       | 3       | 6       | 11        | 5         | 1         | 0         | 5         | 6         | Bacteria; Actinobacteria; Actinobacteria; Actinomycetales; Nocardioidaceae                                        |
| Otu955  | 1        | 4       | 5       | 4       | 3       | 10      | 1         | 1         | 1         | 2         | 10        | 1         | Bacteria; Chloroflexi; Anaerolineae; GCA004                                                                       |
| Otu958  | 10       | 5       | 3       | 5       | 0       | 2       | 1         | 1         | 3         | 3         | 1         | 1         | Bacteria; Acidobacteria; Sva0725; Sva0725                                                                         |
| Otu959  | 10       | 6       | 4       | 11      | 4       | 2       | 13        | 4         | 6         | 7         | 10        | 2         | Bacteria; Actinobacteria; Acidimicrobia; Acidimicrobiales; EB1017                                                 |
| Otu778  | 12       | 1       | 0       | 0       | 2       | 0       | 0         | 0         | 0         | 0         | 6         | 0         | Bacteria; Verrucomicrobia; Spartobacteria; Chthoniobacteriales; Chthoniobacteraceae; Candidatus_Xiphinematobacter |
| Otu779  | 1        | 13      | 15      | 14      | 18      | 5       | 8         | 4         | 4         | 3         | 16        | 2         | Bacteria; Proteobacteria; Deltaproteobacteria; Myxococcales; Myxococcaceae; Anaeromyxobacter                      |
| Otu3201 | 0        | 1       | 1       | 1       | 0       | 0       | 0         | 0         | 1         | 2         | 2         | 0         | Bacteria; ODI; ABY1                                                                                               |
| Otu3048 | 0        | 1       | 0       | 3       | 1       | 0       | 0         | 0         | 0         | 0         | 0         | 0         | Bacteria; Proteobacteria; Gammaproteobacteria; Legionellales                                                      |
| Otu3049 | 2        | 0       | 0       | 0       | 1       | 0       | 0         | 1         | 0         | 1         | 1         | 0         | Bacteria; Chlorobi                                                                                                |
| Otu3040 | 2        | 0       | 0       | 0       | 0       | 0       | 0         | 0         | 0         | 0         | 0         | 0         | Bacteria; Proteobacteria; Deltaproteobacteria                                                                     |
| Otu3041 | 10       | 1       | 5       | 7       | 8       | 6       | 1         | 1         | 3         | 4         | 19        | 11        | Bacteria; Proteobacteria; Betaproteobacteria; Rhodocyclales; Rhodocyclaceae                                       |
| Otu3042 | 12       | 2       | 3       | 9       | 3       | 11      | 5         | 9         | 14        | 7         | 6         | 5         | Bacteria; Proteobacteria; Deltaproteobacteria; Myxococcales                                                       |
| Otu3043 | 0        | 2       | 0       | 1       | 0       | 2       | 0         | 0         | 0         | 2         | 4         | 1         | Bacteria; Bacteroidetes; Sphingobacteriia; Sphingobacteriales                                                     |
| Otu3044 | 0        | 1       | 0       | 2       | 0       | 0       | 0         | 0         | 0         | 0         | 0         | 0         | Bacteria; Proteobacteria; Gammaproteobacteria; Pseudomonadales; Moraxellaceae                                     |
| Otu3045 | 3        | 5       | 2       | 2       | 3       | 1       | 7         | 4         | 3         | 1         | 3         | 0         | Bacteria; Actinobacteria; Actinobacteria; Actinomycetales; Intrasporangiaceae; Phycococcus                        |
| Otu3046 | 0        | 0       | 2       | 0       | 0       | 0       | 0         | 0         | 0         | 0         | 0         | 0         | Bacteria; Proteobacteria                                                                                          |
| Otu3047 | 3        | 2       | 2       | 0       | 0       | 1       | 2         | 3         | 1         | 0         | 3         | 0         | Bacteria; Firmicutes; Clostridia; Clostridiales; Ruminococcaceae                                                  |
| Otu2380 | 2        | 0       | 0       | 0       | 0       | 0       | 0         | 1         | 0         | 0         | 0         | 1         | Bacteria; Proteobacteria; Deltaproteobacteria; Bdellovibrionales; Bdellovibrionaceae; Bdellovibrio                |
| Otu2046 | 3        | 1       | 1       | 1       | 2       | 4       | 2         | 3         | 0         | 1         | 3         | 1         | Bacteria; Planctomycetes; Planctomycetia; Gemmatales; Gemmataceae; Gemmata                                        |
| Otu1848 | 3        | 0       | 0       | 0       | 0       | 0       | 0         | 0         | 0         | 0         | 0         | 0         | Bacteria; Actinobacteria; Thermoleophilia; Gaiellales; AK1AB1_02E                                                 |

| #OTU ID | Z31DSO1r | Z31DSO2 | Z31DSO3 | Z31DSO4 | Z31DSO5 | Z31DSO6 | Z31J1DSO1 | Z31J1DSO2 | Z31J1DSO3 | Z31J1DSO4 | Z31J1DSO5 | Z31J1DSO6 | taxonomy                                                                                           |
|---------|----------|---------|---------|---------|---------|---------|-----------|-----------|-----------|-----------|-----------|-----------|----------------------------------------------------------------------------------------------------|
| Otu3175 | 0        | 0       | 0       | 2       | 1       | 0       | 1         | 2         | 1         | 2         | 2         | 0         | Bacteria; Planctomycetes; Planctomycetia; Pirellulales; Pirellulaceae                              |
| Otu1849 | 4        | 0       | 0       | 2       | 0       | 0       | 2         | 0         | 0         | 2         | 0         | 1         | Bacteria; Armatimonadetes; OPB50                                                                   |
| Otu3109 | 1        | 0       | 1       | 1       | 1       | 1       | 1         | 0         | 2         | 1         | 0         | 2         | Bacteria; Proteobacteria; TA18; PHOS-HD29                                                          |
| Otu3108 | 0        | 0       | 0       | 0       | 1       | 0       | 0         | 0         | 0         | 3         | 3         | 2         | Bacteria                                                                                           |
| Otu2381 | 2        | 0       | 0       | 0       | 0       | 2       | 0         | 0         | 0         | 2         | 0         | 0         | Bacteria                                                                                           |
| Otu3104 | 0        | 0       | 0       | 1       | 0       | 2       | 1         | 0         | 0         | 0         | 1         | 0         | Bacteria; Proteobacteria; Deltaproteobacteria; Myxococcales; Cystobacterineae                      |
| Otu3107 | 0        | 0       | 0       | 0       | 0       | 0       | 0         | 2         | 0         | 0         | 0         | 0         | Bacteria; Actinobacteria; Thermoleophilia; Solirubrobacterales; Conexibacteraceae; Conexibacter    |
| Otu3106 | 0        | 2       | 0       | 0       | 0       | 0       | 0         | 0         | 0         | 0         | 0         | 0         | Bacteria; Proteobacteria; Betaproteobacteria                                                       |
| Otu3101 | 0        | 0       | 0       | 0       | 0       | 0       | 0         | 0         | 5         | 2         | 1         | 0         | Bacteria; ODI; SM2F11                                                                              |
| Otu3100 | 1        | 0       | 0       | 0       | 0       | 0       | 1         | 3         | 0         | 1         | 0         | 1         | Bacteria; Planctomycetes; Planctomycetia; Gemmatales; Gemmataceae; Gemmata                         |
| Otu3103 | 2        | 0       | 0       | 2       | 1       | 0       | 0         | 1         | 1         | 1         | 1         | 1         | Bacteria; Nitrospirae; Nitrospira; Nitrospirales; 0319-6A21                                        |
| Otu3102 | 2        | 7       | 2       | 4       | 3       | 0       | 1         | 1         | 0         | 1         | 4         | 2         | Bacteria; Proteobacteria; Alphaproteobacteria; Rhizobiales                                         |
| Otu2409 | 2        | 0       | 1       | 2       | 2       | 1       | 1         | 0         | 3         | 2         | 2         | 1         | Bacteria; Planctomycetes; vadinHA49; DH61                                                          |
| Otu2048 | 3        | 0       | 0       | 0       | 0       | 0       | 0         | 0         | 0         | 0         | 0         | 0         | Bacteria                                                                                           |
| Otu2403 | 2        | 0       | 0       | 0       | 0       | 0       | 0         | 0         | 1         | 2         | 0         | 1         | Bacteria; Proteobacteria; Deltaproteobacteria; Bdellovibrionales; Bdellovibrionaceae; Bdellovibrio |
| Otu2402 | 2        | 0       | 1       | 2       | 1       | 0       | 2         | 0         | 1         | 2         | 2         | 1         | Bacteria; Proteobacteria; Deltaproteobacteria; MIZ46                                               |
| Otu2401 | 0        | 0       | 0       | 0       | 0       | 2       | 1         | 0         | 1         | 0         | 1         | 0         | Bacteria; Chloroflexi; Ktedonobacteria; JG30-KF-AS9                                                |
| Otu2400 | 0        | 0       | 1       | 0       | 0       | 0       | 0         | 2         | 0         | 0         | 0         | 0         | Bacteria; Bacteroidetes; Sphingobacteriia; Sphingobacteriales                                      |
| Otu2407 | 1        | 0       | 1       | 1       | 1       | 0       | 0         | 2         | 0         | 2         | 2         | 2         | Bacteria; Gemmatimonadetes; Gemmatimonadetes; N1423WL                                              |
| Otu2406 | 2        | 0       | 0       | 0       | 0       | 0       | 0         | 0         | 1         | 0         | 0         | 0         | Bacteria; Tenericutes; Mollicutes; Anaeroplasmatales; Anaeroplasmataceae; Asteroleplasma           |
| Otu2405 | 0        | 1       | 0       | 3       | 0       | 0       | 1         | 0         | 2         | 2         | 0         | 1         | Bacteria; Bacteroidetes                                                                            |
| Otu2404 | 3        | 1       | 0       | 0       | 0       | 0       | 0         | 0         | 0         | 0         | 0         | 0         | Bacteria; Chloroflexi                                                                              |

| #OTU ID | Z31DSO1r | Z31DSO2 | Z31DSO3 | Z31DSO4 | Z31DSO5 | Z31DSO6 | Z31JDSO1 | Z31JDSO2 | Z31JDSO3 | Z31JDSO4 | Z31JDSO5 | Z31JDSO6 | taxonomy                                                                                 |
|---------|----------|---------|---------|---------|---------|---------|----------|----------|----------|----------|----------|----------|------------------------------------------------------------------------------------------|
| Otu174  | 145      | 123     | 74      | 134     | 70      | 69      | 33       | 21       | 38       | 88       | 114      | 25       | Bacteria; Bacteroidetes; Saprospirae; Saprospirales; Chitinophagaceae                    |
| Otu175  | 34       | 16      | 27      | 36      | 14      | 17      | 40       | 18       | 55       | 66       | 23       | 34       | Bacteria; Bacteroidetes; Saprospirae; Saprospirales; Chitinophagaceae                    |
| Otu176  | 7        | 13      | 97      | 7       | 5       | 0       | 3        | 0        | 9        | 4        | 6        | 8        | Bacteria; Bacteroidetes; Saprospirae; Saprospirales; Chitinophagaceae                    |
| Otu177  | 142      | 59      | 31      | 63      | 62      | 16      | 43       | 20       | 26       | 60       | 71       | 33       | Bacteria; Bacteroidetes; Saprospirae; Saprospirales; Chitinophagaceae                    |
| Otu170  | 87       | 90      | 54      | 64      | 32      | 38      | 106      | 81       | 98       | 72       | 48       | 57       | Bacteria; Proteobacteria; Deltaproteobacteria; Myxococcales; Haliangiaceae               |
| Otu171  | 38       | 17      | 119     | 56      | 34      | 23      | 68       | 29       | 19       | 171      | 30       | 61       | Bacteria; Proteobacteria; Betaproteobacteria; Burkholderiales; Comamonadaceae; Comamonas |
| Otu172  | 0        | 3       | 0       | 0       | 1       | 0       | 0        | 0        | 0        | 26       | 67       | 2        | Bacteria; Proteobacteria; Gammaproteobacteria; Legionellales; Coxiellaceae; Aquicella    |
| Otu173  | 0        | 3       | 7       | 11      | 1       | 0       | 99       | 14       | 9        | 17       | 14       | 2        | Bacteria; Proteobacteria; Gammaproteobacteria; Legionellales; Coxiellaceae; Aquicella    |
| Otu178  | 80       | 22      | 23      | 32      | 21      | 17      | 40       | 28       | 38       | 47       | 41       | 35       | Bacteria; Acidobacteria; Acidobacteriia; Acidobacteriales; Koribacteraceae               |
| Otu179  | 29       | 10      | 29      | 52      | 13      | 13      | 71       | 84       | 55       | 68       | 37       | 67       | Bacteria; Gemmatimonadetes; Gemmatimonadetes; Gemmatimonadales                           |
| Otu1693 | 1        | 2       | 0       | 3       | 1       | 4       | 1        | 2        | 2        | 2        | 0        | 0        | Bacteria; Acidobacteria; TM1                                                             |
| Otu1692 | 2        | 3       | 3       | 0       | 0       | 0       | 0        | 0        | 0        | 2        | 0        | 1        | Bacteria; Bacteroidetes                                                                  |
| Otu1691 | 2        | 3       | 0       | 0       | 3       | 2       | 0        | 0        | 0        | 1        | 1        | 0        | Bacteria; Verrucomicrobia; Pedosphaerae; Pedosphaerales                                  |
| Otu1690 | 0        | 3       | 1       | 2       | 1       | 5       | 0        | 0        | 1        | 3        | 0        | 3        | Bacteria; Chloroflexi; Anaerolineae; SBR1031; A4b                                        |
| Otu1697 | 3        | 4       | 1       | 7       | 4       | 3       | 2        | 0        | 7        | 15       | 3        | 2        | Bacteria; Proteobacteria; Gammaproteobacteria; Legionellales; Coxiellaceae               |
| Otu1696 | 7        | 6       | 9       | 4       | 13      | 1       | 2        | 5        | 11       | 6        | 3        | 8        | Bacteria; Bacteroidetes; Saprospirae; Saprospirales; Chitinophagaceae                    |
| Otu1695 | 0        | 3       | 0       | 6       | 0       | 4       | 4        | 5        | 5        | 0        | 3        | 3        | Bacteria; FCPU426                                                                        |
| Otu1694 | 0        | 0       | 0       | 0       | 0       | 0       | 0        | 0        | 0        | 4        | 3        | 0        | Bacteria; Chloroflexi; C0119                                                             |
| Otu1846 | 0        | 0       | 0       | 0       | 0       | 0       | 3        | 0        | 0        | 0        | 0        | 0        | Bacteria; Proteobacteria                                                                 |
| Otu1699 | 0        | 0       | 3       | 0       | 0       | 0       | 0        | 0        | 0        | 0        | 0        | 0        | Bacteria; Firmicutes; Bacilli; Bacillales; Paenibacillaceae; Paenibacillus               |
| Otu1698 | 4        | 3       | 0       | 2       | 0       | 2       | 2        | 1        | 1        | 2        | 3        | 1        | Bacteria; Chloroflexi; Ktedonobacteria; JG30-KF-AS9                                      |
| Otu1847 | 0        | 0       | 0       | 1       | 0       | 0       | 0        | 1        | 0        | 0        | 0        | 3        | Bacteria; TM6; SJA-4                                                                     |



| #OTU ID | Z31DSO1r | Z31DSO2 | Z31DSO3 | Z31DSO4 | Z31DSO5 | Z31DSO6 | Z31JDSO1 | Z31JDSO2 | Z31JDSO3 | Z31JDSO4 | Z31JDSO5 | Z31JDSO6 | taxonomy                                                                                        |
|---------|----------|---------|---------|---------|---------|---------|----------|----------|----------|----------|----------|----------|-------------------------------------------------------------------------------------------------|
| Otu1513 | 6        | 0       | 0       | 0       | 0       | 3       | 0        | 0        | 0        | 3        | 1        | 2        | Bacteria; Chlamydiae; Chlamydiai; Chlamydiales; Rhabdochlamydiaceae; Candidatus_Rhabdochlamydia |
| Otu2128 | 1        | 1       | 0       | 0       | 1       | 0       | 0        | 0        | 0        | 0        | 4        | 0        | Bacteria; Gemmatimonadetes; Gemm-1                                                              |
| Otu2129 | 10       | 16      | 18      | 10      | 5       | 10      | 17       | 18       | 15       | 12       | 19       | 22       | Bacteria; Proteobacteria; Gammaproteobacteria; Xanthomonadales; Sinobacteraceae                 |
| Otu2317 | 36       | 24      | 19      | 40      | 21      | 36      | 23       | 37       | 21       | 58       | 81       | 27       | Bacteria; Planctomycetes; Phycisphaerae; WD2101                                                 |
| Otu2316 | 0        | 0       | 1       | 3       | 0       | 0       | 0        | 2        | 3        | 5        | 1        | 2        | Bacteria; Bacteroidetes; Sphingobacteriia; Sphingobacteriales; Sphingobacteriaceae              |
| Otu2315 | 2        | 0       | 0       | 0       | 0       | 0       | 0        | 0        | 0        | 0        | 0        | 0        | Bacteria; Proteobacteria                                                                        |
| Otu2314 | 0        | 0       | 0       | 0       | 1       | 0       | 1        | 2        | 0        | 0        | 1        | 0        | Bacteria; Proteobacteria; Deltaproteobacteria                                                   |
| Otu2313 | 2        | 0       | 1       | 1       | 0       | 0       | 0        | 0        | 1        | 0        | 2        | 0        | Bacteria; WS3; PRR-12; Sediment-1                                                               |
| Otu2312 | 0        | 0       | 2       | 0       | 0       | 0       | 0        | 0        | 0        | 0        | 0        | 0        | Bacteria; Verrucomicrobia; Spartobacteria; Chthoniobacteriales; Chthoniobacteraceae             |
| Otu2311 | 3        | 1       | 0       | 0       | 1       | 0       | 0        | 0        | 1        | 0        | 0        | 0        | Bacteria; Chloroflexi; Chloroflexi; Roseiflexales                                               |
| Otu2310 | 16       | 2       | 9       | 6       | 7       | 2       | 3        | 7        | 8        | 9        | 12       | 3        | Bacteria; Proteobacteria; Betaproteobacteria; Burkholderiales; Comamonadaceae                   |
| Otu3211 | 0        | 0       | 0       | 1       | 2       | 0       | 0        | 0        | 1        | 0        | 0        | 1        | Bacteria; TM6                                                                                   |
| Otu3210 | 0        | 3       | 2       | 0       | 0       | 0       | 0        | 0        | 0        | 0        | 0        | 0        | Bacteria; Proteobacteria; Gammaproteobacteria; Legionellales; Legionellaceae                    |
| Otu3213 | 2        | 0       | 0       | 0       | 0       | 0       | 0        | 0        | 0        | 0        | 0        | 0        | Bacteria                                                                                        |
| Otu3212 | 2        | 0       | 0       | 0       | 1       | 0       | 0        | 0        | 1        | 1        | 0        | 0        | Bacteria; TM7; TM7-1                                                                            |
| Otu3215 | 0        | 0       | 0       | 0       | 0       | 0       | 2        | 0        | 0        | 0        | 0        | 0        | Bacteria; Proteobacteria; Alphaproteobacteria; Rhizobiales; Rhizobiaceae; Kaistia               |
| Otu3214 | 4        | 1       | 0       | 2       | 1       | 9       | 0        | 0        | 2        | 2        | 1        | 1        | Bacteria; Planctomycetes; Phycisphaerae; CPla-3                                                 |
| Otu2319 | 0        | 0       | 1       | 0       | 0       | 3       | 1        | 0        | 2        | 0        | 0        | 1        | Bacteria; Planctomycetes; Planctomycetia; Planctomycetales; Planctomycetaceae; Planctomyces     |
| Otu2318 | 2        | 5       | 3       | 5       | 0       | 6       | 2        | 0        | 3        | 1        | 4        | 0        | Bacteria; Proteobacteria; Gammaproteobacteria; Legionellales                                    |
| Otu2124 | 0        | 0       | 0       | 1       | 1       | 1       | 1        | 0        | 3        | 0        | 0        | 2        | Bacteria                                                                                        |
| Otu2125 | 0        | 0       | 1       | 0       | 0       | 0       | 3        | 0        | 0        | 0        | 3        | 0        | Bacteria; Firmicutes; Bacilli; Bacillales                                                       |
| Otu2388 | 3        | 4       | 3       | 4       | 2       | 6       | 5        | 1        | 2        | 2        | 3        | 2        | Bacteria; Elusimicrobia; Elusimicrobia; IIb                                                     |

| #OTU ID | Z31DSO1r | Z31DSO2 | Z31DSO3 | Z31DSO4 | Z31DSO5 | Z31DSO6 | Z31JDSO1 | Z31JDSO2 | Z31JDSO3 | Z31JDSO4 | Z31JDSO5 | Z31JDSO6 | taxonomy                                                                                           |
|---------|----------|---------|---------|---------|---------|---------|----------|----------|----------|----------|----------|----------|----------------------------------------------------------------------------------------------------|
| Otu2389 | 4        | 1       | 0       | 2       | 1       | 0       | 0        | 1        | 1        | 0        | 4        | 2        | Bacteria; Acidobacteria; Acidobacteria-6                                                           |
| Otu2289 | 1        | 0       | 0       | 2       | 2       | 0       | 0        | 0        | 0        | 0        | 2        | 0        | Bacteria; Proteobacteria; Gammaproteobacteria; Xanthomonadales; Xanthomonadaceae                   |
| Otu1515 | 4        | 4       | 3       | 3       | 0       | 4       | 3        | 1        | 0        | 1        | 3        | 1        | Bacteria; Proteobacteria; Betaproteobacteria; SC-I-84                                              |
| Otu2288 | 0        | 0       | 1       | 1       | 0       | 0       | 0        | 1        | 0        | 2        | 0        | 0        | Bacteria; Firmicutes; Clostridia; Clostridiales; Gracilibacteraceae                                |
| Otu2078 | 58       | 21      | 31      | 55      | 16      | 35      | 43       | 40       | 49       | 49       | 46       | 19       | Bacteria; Acidobacteria; Solibacteres; Solibacterales; Solibacteraceae; Candidatus_Solibacter      |
| Otu2079 | 0        | 0       | 0       | 1       | 3       | 1       | 0        | 0        | 0        | 0        | 0        | 0        | Bacteria                                                                                           |
| Otu2072 | 3        | 0       | 0       | 0       | 0       | 0       | 0        | 0        | 0        | 0        | 2        | 1        | Bacteria; Proteobacteria; Deltaproteobacteria                                                      |
| Otu2073 | 2        | 0       | 2       | 3       | 3       | 1       | 1        | 0        | 0        | 1        | 7        | 2        | Bacteria; Armatimonadetes; Chthonomonadetes; SJA-22                                                |
| Otu2070 | 2        | 0       | 0       | 2       | 1       | 0       | 4        | 0        | 3        | 2        | 0        | 0        | Bacteria; Planctomycetes; Planctomycetia; Planctomycetales; Planctomycetaceae; Planctomyces        |
| Otu2071 | 17       | 2       | 9       | 13      | 8       | 7       | 13       | 6        | 2        | 12       | 16       | 1        | Bacteria; Verrucomicrobia; Spartobacteria; Chthoniobacteriales; Chthoniobacteraceae; Ellin506      |
| Otu2076 | 0        | 0       | 1       | 2       | 0       | 3       | 2        | 0        | 4        | 1        | 1        | 0        | Bacteria; Planctomycetes; Phycisphaerae; CPLa-3                                                    |
| Otu2077 | 0        | 0       | 0       | 0       | 0       | 0       | 0        | 0        | 0        | 3        | 1        | 1        | Bacteria; Planctomycetes; Planctomycetia; Pirellulales; Pirellulaceae; A17                         |
| Otu2074 | 12       | 6       | 11      | 14      | 5       | 12      | 17       | 11       | 8        | 9        | 16       | 4        | Bacteria; Actinobacteria; Actinobacteria; Actinomycetales; Pseudonocardiaceae; Pseudonocardia      |
| Otu2075 | 1        | 1       | 2       | 2       | 2       | 0       | 0        | 2        | 3        | 0        | 1        | 0        | Bacteria; Proteobacteria; Gammaproteobacteria; Legionellales                                       |
| Otu2387 | 0        | 0       | 0       | 0       | 0       | 0       | 1        | 0        | 0        | 4        | 0        | 2        | Bacteria; TM7; SC3                                                                                 |
| Otu2278 | 1        | 0       | 1       | 1       | 2       | 2       | 0        | 0        | 0        | 1        | 4        | 1        | Bacteria; Proteobacteria; Deltaproteobacteria; Myxococcales                                        |
| Otu2279 | 3        | 0       | 0       | 0       | 0       | 0       | 0        | 0        | 0        | 1        | 0        | 1        | Bacteria; WPS-2                                                                                    |
| Otu2274 | 1        | 0       | 1       | 0       | 0       | 0       | 0        | 1        | 0        | 2        | 0        | 1        | Bacteria; Proteobacteria; Alphaproteobacteria; Rhizobiales; Rhodobiaceae; Afifella                 |
| Otu2275 | 0        | 0       | 0       | 2       | 0       | 0       | 0        | 0        | 1        | 0        | 1        | 0        | Bacteria; Proteobacteria; Deltaproteobacteria; Bdellovibrionales; Bdellovibrionaceae; Bdellovibrio |
| Otu2276 | 0        | 2       | 2       | 0       | 0       | 0       | 0        | 0        | 0        | 0        | 0        | 0        | Bacteria; Chloroflexi; Anaerolineae; GCA004                                                        |
| Otu2277 | 2        | 0       | 0       | 0       | 0       | 0       | 0        | 0        | 0        | 0        | 0        | 0        | Bacteria; Proteobacteria; Gammaproteobacteria                                                      |
| Otu2270 | 0        | 1       | 0       | 1       | 0       | 1       | 1        | 1        | 2        | 1        | 2        | 0        | Bacteria; Elusimicrobia; Elusimicrobia; I1b                                                        |

| #OTU ID | Z31DSO1r | Z31DSO2 | Z31DSO3 | Z31DSO4 | Z31DSO5 | Z31DSO6 | Z31JDSO1 | Z31JDSO2 | Z31JDSO3 | Z31JDSO4 | Z31JDSO5 | Z31JDSO6 | taxonomy                                                                                        |
|---------|----------|---------|---------|---------|---------|---------|----------|----------|----------|----------|----------|----------|-------------------------------------------------------------------------------------------------|
| Otu2271 | 0        | 2       | 0       | 1       | 0       | 0       | 0        | 2        | 1        | 2        | 0        | 0        | Bacteria; Proteobacteria; Gammaproteobacteria; Legionellales                                    |
| Otu2272 | 4        | 1       | 3       | 2       | 0       | 0       | 0        | 0        | 1        | 2        | 4        | 1        | Bacteria; Armatimonadetes; Chthonomonadetes; Chthonomonadales; Chthonomonadaceae                |
| Otu2273 | 1        | 4       | 2       | 2       | 0       | 0       | 1        | 0        | 0        | 1        | 0        | 0        | Bacteria; Proteobacteria; Gammaproteobacteria; Xanthomonadales; Sinobacteraceae; Steroidobacter |
| Otu3012 | 0        | 1       | 1       | 2       | 0       | 1       | 3        | 0        | 1        | 2        | 1        | 0        | Bacteria; Actinobacteria; Acidimicrobia; Acidimicrobiales; EB1017                               |
| Otu3011 | 1        | 1       | 0       | 2       | 0       | 1       | 1        | 2        | 1        | 0        | 0        | 1        | Bacteria; Acidobacteria; DA052; Ellin6513                                                       |
| Otu2026 | 9        | 1       | 1       | 4       | 1       | 0       | 3        | 2        | 1        | 2        | 1        | 0        | Bacteria                                                                                        |
| Otu3010 | 2        | 0       | 0       | 2       | 0       | 1       | 0        | 1        | 1        | 1        | 2        | 1        | Bacteria                                                                                        |
| Otu61   | 12       | 5       | 27      | 69      | 40      | 205     | 6        | 30       | 79       | 19       | 55       | 14       | Bacteria; Chloroflexi; Anaerolineae; SBR1031; oc28                                              |
| Otu60   | 91       | 65      | 80      | 156     | 75      | 58      | 121      | 114      | 92       | 99       | 85       | 54       | Bacteria; Verrucomicrobia; Pedosphaerae; Pedosphaerales                                         |
| Otu63   | 233      | 69      | 53      | 112     | 49      | 44      | 153      | 99       | 84       | 139      | 110      | 96       | Bacteria; Gemmatimonadetes; Gemmatimonadetes; Gemmatimonadales; Ellin5301                       |
| Otu62   | 146      | 26      | 135     | 161     | 26      | 46      | 115      | 21       | 14       | 37       | 95       | 35       | Bacteria; Cyanobacteria; Chloroplast; Streptophyta                                              |
| Otu65   | 8        | 3       | 5       | 86      | 17      | 161     | 23       | 8        | 12       | 24       | 43       | 30       | Bacteria; Cyanobacteria                                                                         |
| Otu64   | 115      | 141     | 30      | 183     | 103     | 78      | 76       | 76       | 150      | 194      | 77       | 181      | Bacteria; Bacteroidetes; Cytophagia; Cytophagales; Cytophagaceae                                |
| Otu67   | 202      | 80      | 94      | 237     | 73      | 107     | 181      | 236      | 216      | 140      | 152      | 146      | Bacteria; Acidobacteria; Solibacteres; Solibacterales                                           |
| Otu66   | 198      | 108     | 108     | 109     | 137     | 27      | 75       | 24       | 44       | 132      | 185      | 36       | Bacteria; Acidobacteria; Chloracidobacteria; 11-24                                              |
| Otu69   | 151      | 58      | 23      | 20      | 37      | 8       | 38       | 11       | 25       | 31       | 59       | 34       | Bacteria; Gemmatimonadetes; Gemmatimonadetes                                                    |
| Otu68   | 9        | 73      | 131     | 2       | 88      | 36      | 38       | 25       | 2        | 29       | 3        | 237      | Bacteria; Bacteroidetes; Sphingobacteriia; Sphingobacteriales; Sphingobacteriaceae              |
| Otu3018 | 0        | 0       | 0       | 0       | 0       | 0       | 0        | 0        | 0        | 2        | 0        | 0        | Bacteria; Armatimonadetes; Armatimonadia; Armatimonadales; Armatimonadaceae                     |
| Otu3319 | 7        | 5       | 1       | 3       | 3       | 2       | 1        | 2        | 1        | 3        | 2        | 1        | Bacteria; Acidobacteria; Chloracidobacteria; RB41; Ellin6075                                    |
| Otu3098 | 1        | 0       | 0       | 0       | 1       | 1       | 0        | 5        | 1        | 0        | 1        | 0        | Bacteria; Chlamydiae; Chlamydia; Chlamydiales                                                   |
| Otu2094 | 1        | 0       | 0       | 3       | 0       | 0       | 0        | 0        | 0        | 0        | 0        | 0        | Bacteria; Proteobacteria                                                                        |
| Otu2095 | 3        | 1       | 0       | 0       | 0       | 0       | 0        | 0        | 0        | 0        | 2        | 0        | Bacteria; Planctomycetes; Planctomycetia; Pirellulales; Pirellulaceae; Pirellula                |

| #OTU ID | Z31DSO1r | Z31DSO2 | Z31DSO3 | Z31DSO4 | Z31DSO5 | Z31DSO6 | Z31J1DSO1 | Z31J1DSO2 | Z31J1DSO3 | Z31J1DSO4 | Z31J1DSO5 | Z31J1DSO6 | taxonomy                                                                             |
|---------|----------|---------|---------|---------|---------|---------|-----------|-----------|-----------|-----------|-----------|-----------|--------------------------------------------------------------------------------------|
| Otu2096 | 3        | 3       | 5       | 10      | 4       | 5       | 9         | 9         | 15        | 11        | 21        | 5         | Bacteria; Actinobacteria; Thermoleophilia; Gaiellales; Gaiellaceae                   |
| Otu2097 | 2        | 0       | 1       | 0       | 0       | 2       | 1         | 1         | 0         | 5         | 1         | 0         | Bacteria; Proteobacteria; Deltaproteobacteria; Myxococcales                          |
| Otu2090 | 0        | 0       | 1       | 2       | 0       | 0       | 2         | 0         | 5         | 1         | 0         | 1         | Bacteria; Chlamydiae; Chlamydia; Chlamydiales                                        |
| Otu2091 | 0        | 0       | 1       | 3       | 0       | 0       | 0         | 0         | 0         | 0         | 2         | 0         | Bacteria; Proteobacteria; Gammaproteobacteria; Legionellales                         |
| Otu2092 | 23       | 9       | 11      | 19      | 6       | 33      | 15        | 16        | 11        | 47        | 12        | 44        | Bacteria; Gemmatimonadetes; Gemmatimonadetes; Ellin5290                              |
| Otu2093 | 0        | 3       | 1       | 0       | 4       | 2       | 0         | 0         | 1         | 0         | 1         | 0         | Bacteria; Chloroflexi; Anaerolineae; SBR1031; oc28                                   |
| Otu2098 | 3        | 0       | 0       | 0       | 0       | 0       | 0         | 0         | 0         | 0         | 0         | 0         | Bacteria; Proteobacteria                                                             |
| Otu2099 | 0        | 2       | 0       | 1       | 0       | 0       | 3         | 0         | 0         | 3         | 0         | 1         | Bacteria; Proteobacteria; Alphaproteobacteria; Caulobacterales; Caulobacteraceae     |
| Otu2604 | 0        | 0       | 0       | 0       | 0       | 0       | 2         | 3         | 2         | 0         | 0         | 1         | Bacteria; Bacteroidetes                                                              |
| Otu1040 | 0        | 0       | 0       | 0       | 2       | 0       | 2         | 0         | 0         | 0         | 9         | 0         | Bacteria; Proteobacteria; Gammaproteobacteria; Legionellales; Coxiellales; Aquicella |
| Otu1041 | 91       | 55      | 27      | 31      | 28      | 16      | 38        | 20        | 15        | 27        | 42        | 21        | Bacteria; Acidobacteria; Acidobacteria-6; iii1-15                                    |
| Otu197  | 63       | 68      | 52      | 57      | 53      | 23      | 33        | 13        | 16        | 32        | 85        | 13        | Bacteria; Verrucomicrobia; Pedosphaerae; Pedosphaerales                              |
| Otu1208 | 3        | 3       | 5       | 7       | 4       | 3       | 2         | 2         | 3         | 0         | 4         | 1         | Bacteria; Chloroflexi; Anaerolineae; GCA004                                          |
| Otu1209 | 1        | 3       | 5       | 0       | 3       | 1       | 0         | 0         | 0         | 0         | 8         | 0         | Bacteria; Chloroflexi; Anaerolineae; SBR1031; A4b                                    |
| Otu1204 | 6        | 0       | 2       | 3       | 1       | 6       | 3         | 0         | 0         | 1         | 4         | 1         | Bacteria; Chloroflexi; Ktedonobacteria; JG30-KF-AS9                                  |
| Otu1205 | 1        | 0       | 1       | 3       | 1       | 0       | 0         | 0         | 7         | 0         | 3         | 0         | Bacteria                                                                             |
| Otu1206 | 9        | 8       | 5       | 3       | 1       | 7       | 15        | 5         | 10        | 5         | 7         | 3         | Bacteria; Chloroflexi; C0119                                                         |
| Otu1207 | 2        | 2       | 1       | 0       | 10      | 2       | 1         | 4         | 0         | 0         | 5         | 2         | Bacteria                                                                             |
| Otu1200 | 2        | 0       | 3       | 6       | 1       | 2       | 4         | 3         | 5         | 2         | 5         | 4         | Bacteria; Planctomycetes; Phycisphaerae; WD2101                                      |
| Otu1201 | 5        | 1       | 0       | 0       | 2       | 1       | 1         | 0         | 3         | 1         | 0         | 0         | Bacteria; Planctomycetes; Planctomycetia; Gemmatales; Gemmataceae                    |
| Otu1202 | 10       | 1       | 2       | 0       | 0       | 0       | 0         | 0         | 0         | 0         | 0         | 0         | Bacteria; Planctomycetes; Phycisphaerae; Phycisphaerales                             |
| Otu1203 | 11       | 2       | 15      | 14      | 3       | 12      | 16        | 8         | 11        | 11        | 25        | 6         | Bacteria; Firmicutes; Bacilli; Bacillales; Alicyclobacillaceae; Alicyclobacillus     |

| #OTU ID | Z31DSO1r | Z31DSO2 | Z31DSO3 | Z31DSO4 | Z31DSO5 | Z31DSO6 | Z31JDSO1 | Z31JDSO2 | Z31JDSO3 | Z31JDSO4 | Z31JDSO5 | Z31JDSO6 | taxonomy                                                                                           |
|---------|----------|---------|---------|---------|---------|---------|----------|----------|----------|----------|----------|----------|----------------------------------------------------------------------------------------------------|
| Otu2898 | 0        | 0       | 0       | 0       | 0       | 0       | 0        | 0        | 2        | 0        | 0        | 0        | Bacteria; Chloroflexi; Ktedonobacteria; Ktedonobacterales; Ktedonobacteraceae                      |
| Otu2899 | 2        | 0       | 1       | 0       | 0       | 0       | 0        | 0        | 0        | 0        | 0        | 0        | Bacteria; Chlorobi; Ignavibacteria; Ignavibacteriales; Ignavibacteriaceae                          |
| Otu2894 | 1        | 2       | 5       | 3       | 3       | 3       | 7        | 1        | 6        | 4        | 9        | 0        | Bacteria; Actinobacteria; Thermoleophilia; Solirubrobacterales                                     |
| Otu2895 | 0        | 0       | 0       | 0       | 0       | 0       | 2        | 0        | 0        | 0        | 0        | 0        | Bacteria; Proteobacteria; Alphaproteobacteria; Rhodospirillales; Rhodospirillaceae                 |
| Otu2896 | 0        | 1       | 2       | 0       | 2       | 3       | 1        | 4        | 2        | 0        | 2        | 0        | Bacteria; Bacteroidetes; Sphingobacteriia; Sphingobacteriales                                      |
| Otu2897 | 9        | 5       | 5       | 5       | 0       | 2       | 14       | 4        | 3        | 8        | 5        | 6        | Bacteria; Proteobacteria; Alphaproteobacteria; Rhizobiales; Hyphomicrobiaceae; Rhodoplanes         |
| Otu2890 | 2        | 0       | 0       | 0       | 0       | 0       | 0        | 0        | 0        | 0        | 0        | 0        | Bacteria                                                                                           |
| Otu1048 | 0        | 0       | 0       | 0       | 2       | 0       | 1        | 0        | 0        | 1        | 0        | 10       | Bacteria; Bacteroidetes; Cytophagia; Cytophagales; Cytophagaceae; Dyadobacter                      |
| Otu2892 | 13       | 6       | 6       | 10      | 4       | 5       | 11       | 5        | 2        | 2        | 4        | 4        | Bacteria; Acidobacteria; Acidobacteria-6; iii1-15                                                  |
| Otu2893 | 4        | 1       | 1       | 4       | 1       | 5       | 8        | 9        | 3        | 2        | 2        | 3        | Bacteria; Proteobacteria; Alphaproteobacteria; Caulobacterales; Caulobacteraceae; Phenylobacterium |
| Otu1049 | 22       | 2       | 3       | 4       | 1       | 6       | 2        | 1        | 2        | 1        | 6        | 0        | Bacteria; Acidobacteria; Acidobacteria-6; iii1-15                                                  |
| Otu1935 | 3        | 2       | 2       | 0       | 0       | 0       | 0        | 0        | 1        | 0        | 0        | 0        | Bacteria; TM6; SJA-4                                                                               |
| Otu3191 | 7        | 4       | 6       | 6       | 3       | 2       | 1        | 0        | 4        | 3        | 0        | 3        | Bacteria; Gemmatimonadetes; Gemm-1                                                                 |
| Otu3459 | 3        | 0       | 0       | 0       | 0       | 0       | 0        | 0        | 0        | 0        | 0        | 0        | Bacteria; Proteobacteria                                                                           |
| Otu3458 | 0        | 3       | 0       | 0       | 1       | 0       | 0        | 0        | 1        | 1        | 4        | 0        | Bacteria; OD1; SM2F11                                                                              |
| Otu3457 | 1        | 1       | 0       | 2       | 2       | 0       | 1        | 0        | 0        | 1        | 1        | 0        | Bacteria; Proteobacteria; TA18; PHOS-HD29                                                          |
| Otu3456 | 3        | 0       | 0       | 0       | 0       | 0       | 0        | 0        | 0        | 0        | 0        | 1        | Bacteria; Acidobacteria; Solibacteres; Solibacterales; Solibacteraceae; Candidatus_Solibacter      |
| Otu3455 | 0        | 2       | 0       | 1       | 0       | 1       | 0        | 0        | 1        | 0        | 0        | 0        | Bacteria; FBP                                                                                      |
| Otu3454 | 0        | 0       | 0       | 0       | 2       | 0       | 0        | 0        | 0        | 0        | 0        | 0        | Bacteria; Bacteroidetes; Cytophagia; Cytophagales; Cytophagaceae                                   |
| Otu3453 | 0        | 2       | 1       | 2       | 0       | 0       | 3        | 0        | 1        | 1        | 3        | 2        | Bacteria; Actinobacteria; Actinobacteria; Actinomycetales; Nocardioideae; Nocardioidea             |
| Otu3451 | 3        | 0       | 0       | 1       | 0       | 0       | 0        | 0        | 0        | 0        | 0        | 1        | Bacteria; Proteobacteria; Deltaproteobacteria                                                      |
| Otu3450 | 1        | 2       | 0       | 0       | 0       | 1       | 1        | 1        | 1        | 0        | 0        | 0        | Bacteria; Proteobacteria; Alphaproteobacteria; Rhodospirillales                                    |

| #OTU ID | Z31DSO1r | Z31DSO2 | Z31DSO3 | Z31DSO4 | Z31DSO5 | Z31DSO6 | Z31J1DSO1 | Z31J1DSO2 | Z31J1DSO3 | Z31J1DSO4 | Z31J1DSO5 | Z31J1DSO6 | taxonomy                                                                                                  |
|---------|----------|---------|---------|---------|---------|---------|-----------|-----------|-----------|-----------|-----------|-----------|-----------------------------------------------------------------------------------------------------------|
| Otu1338 | 0        | 0       | 3       | 6       | 5       | 1       | 1         | 0         | 0         | 3         | 4         | 1         | Bacteria; Proteobacteria; Gammaproteobacteria                                                             |
| Otu1339 | 4        | 5       | 2       | 7       | 2       | 3       | 3         | 0         | 2         | 10        | 7         | 2         | Bacteria; Proteobacteria; Deltaproteobacteria; Myxococcales                                               |
| Otu1330 | 3        | 1       | 5       | 3       | 0       | 5       | 0         | 0         | 1         | 3         | 3         | 4         | Bacteria; Proteobacteria; Deltaproteobacteria; Bdellovibrionales; Bdellovibrionaceae; Bdellovibrio        |
| Otu1331 | 7        | 1       | 5       | 10      | 5       | 4       | 16        | 5         | 6         | 3         | 7         | 6         | Bacteria; Planctomycetes; Planctomycetia; Gemmatales; Isosphaeraceae                                      |
| Otu1332 | 6        | 1       | 0       | 0       | 0       | 0       | 0         | 0         | 0         | 0         | 0         | 0         | Bacteria; Planctomycetes; OM190; CL500-15                                                                 |
| Otu1333 | 7        | 0       | 2       | 4       | 2       | 3       | 3         | 1         | 5         | 3         | 1         | 3         | Bacteria; Planctomycetes; Planctomycetia; Pirellulales; Pirellulaceae; Pirellula                          |
| Otu1334 | 0        | 1       | 2       | 3       | 1       | 0       | 3         | 4         | 5         | 15        | 3         | 4         | Bacteria; Chlamydiae; Chlamydia; Chlamydiales                                                             |
| Otu1335 | 11       | 11      | 5       | 9       | 6       | 0       | 14        | 5         | 3         | 3         | 12        | 4         | Bacteria; Actinobacteria; Thermoleophilia; Gaiellales; Gaiellaceae                                        |
| Otu1336 | 0        | 0       | 0       | 5       | 2       | 0       | 1         | 1         | 0         | 0         | 5         | 0         | Bacteria; Cyanobacteria; Chloroplast; Streptophyta                                                        |
| Otu1337 | 3        | 0       | 1       | 7       | 0       | 1       | 3         | 0         | 0         | 2         | 0         | 2         | Bacteria; Armatimonadetes; Chthonomonadetes; Chthonomonadales; Chthonomonadaceae                          |
| Otu2670 | 3        | 0       | 0       | 0       | 0       | 0       | 0         | 0         | 1         | 0         | 1         | 0         | Bacteria; Verrucomicrobia; Spartobacteria; Chthoniobacteriales; Chthoniobacteraceae                       |
| Otu2671 | 2        | 0       | 0       | 0       | 0       | 0       | 0         | 0         | 0         | 0         | 0         | 0         | Bacteria; Planctomycetes; vadinHA49; p04_C01                                                              |
| Otu2672 | 0        | 0       | 0       | 2       | 0       | 0       | 0         | 0         | 1         | 0         | 1         | 0         | Bacteria; Proteobacteria; Deltaproteobacteria; Myxococcales                                               |
| Otu2673 | 2        | 0       | 0       | 0       | 0       | 0       | 0         | 0         | 0         | 0         | 0         | 0         | Bacteria; Armatimonadetes; Armatimonadia; Armatimonadales; Armatimonadaceae                               |
| Otu2674 | 0        | 0       | 0       | 1       | 0       | 1       | 0         | 1         | 1         | 0         | 0         | 3         | Bacteria                                                                                                  |
| Otu2675 | 11       | 3       | 3       | 6       | 0       | 0       | 8         | 3         | 4         | 7         | 7         | 2         | Bacteria; Proteobacteria; Alphaproteobacteria; Rhodospirillales; Rhodospirillaceae                        |
| Otu2676 | 2        | 0       | 0       | 1       | 2       | 1       | 0         | 1         | 0         | 0         | 0         | 1         | Bacteria; Proteobacteria; Deltaproteobacteria                                                             |
| Otu2677 | 4        | 1       | 4       | 8       | 6       | 3       | 12        | 4         | 7         | 15        | 5         | 4         | Bacteria; Proteobacteria; Gammaproteobacteria; Legionellales; Coxiellaceae; Aquicella                     |
| Otu2678 | 0        | 0       | 0       | 0       | 0       | 1       | 0         | 0         | 0         | 2         | 0         | 1         | Bacteria; TM6; SJA-4                                                                                      |
| Otu2679 | 0        | 0       | 1       | 0       | 0       | 0       | 0         | 0         | 0         | 0         | 3         | 0         | Bacteria; Proteobacteria; Deltaproteobacteria; Myxococcales                                               |
| Otu3447 | 0        | 0       | 0       | 0       | 0       | 0       | 0         | 0         | 0         | 0         | 0         | 2         | Bacteria; Bacteroidetes; Saprospirae; Saprospirales; Chitinophagaceae                                     |
| Otu1939 | 0        | 0       | 4       | 3       | 0       | 1       | 0         | 0         | 0         | 0         | 4         | 0         | Bacteria; Proteobacteria; Betaproteobacteria; Burkholderiales; Burkholderiaceae; Candidatus_Glomeribacter |

| #OTU ID | Z31DSO1r | Z31DSO2 | Z31DSO3 | Z31DSO4 | Z31DSO5 | Z31DSO6 | Z31J1DSO1 | Z31J1DSO2 | Z31J1DSO3 | Z31J1DSO4 | Z31J1DSO5 | Z31J1DSO6 | taxonomy                                                                                      |
|---------|----------|---------|---------|---------|---------|---------|-----------|-----------|-----------|-----------|-----------|-----------|-----------------------------------------------------------------------------------------------|
| Otu789  | 1        | 6       | 0       | 5       | 1       | 0       | 1         | 0         | 0         | 14        | 3         | 0         | Bacteria; Verrucomicrobia; Opitutae; Cerasicoccales; Cerasicocaceae                           |
| Otu788  | 2        | 5       | 6       | 16      | 4       | 22      | 11        | 14        | 19        | 15        | 15        | 16        | Bacteria; Chloroflexi; TK10; AKYG885; Dolo_23                                                 |
| Otu3137 | 3        | 0       | 0       | 0       | 0       | 0       | 0         | 0         | 0         | 0         | 2         | 0         | Bacteria; Planctomycetes; Planctomycetia; Pirellulales; Pirellulaceae                         |
| Otu783  | 28       | 9       | 9       | 7       | 5       | 1       | 10        | 1         | 1         | 5         | 5         | 1         | Bacteria; Proteobacteria; Betaproteobacteria                                                  |
| Otu782  | 48       | 29      | 29      | 35      | 20      | 27      | 24        | 23        | 30        | 22        | 33        | 26        | Bacteria; Acidobacteria; Solibacteres; Solibacterales; Solibacteraceae; Candidatus_Solibacter |
| Otu781  | 5        | 6       | 3       | 24      | 1       | 4       | 9         | 5         | 12        | 4         | 9         | 1         | Bacteria; Bacteroidetes; Saprospirae; Saprospirales; Chitinophagaceae                         |
| Otu780  | 12       | 0       | 1       | 1       | 0       | 0       | 1         | 0         | 1         | 0         | 2         | 0         | Bacteria; Planctomycetes; Planctomycetia; Pirellulales; Pirellulaceae                         |
| Otu787  | 40       | 21      | 67      | 36      | 29      | 12      | 74        | 20        | 43        | 27        | 55        | 19        | Bacteria; Proteobacteria; Betaproteobacteria; Burkholderiales; Oxalobacteraceae               |
| Otu786  | 24       | 5       | 9       | 26      | 5       | 16      | 22        | 20        | 21        | 16        | 15        | 22        | Bacteria; Proteobacteria; Alphaproteobacteria; Caulobacterales; Caulobacteraceae              |
| Otu785  | 11       | 8       | 12      | 11      | 1       | 8       | 12        | 11        | 5         | 6         | 7         | 1         | Bacteria; Actinobacteria; Actinobacteria; Actinomycetales; Microbacteriaceae                  |
| Otu784  | 6        | 1       | 5       | 3       | 5       | 0       | 4         | 0         | 0         | 4         | 11        | 2         | Bacteria; Proteobacteria; Deltaproteobacteria; Spirobaillales                                 |
| Otu1024 | 1        | 0       | 2       | 7       | 7       | 0       | 0         | 1         | 1         | 4         | 3         | 0         | Bacteria; Proteobacteria; Gammaproteobacteria                                                 |
| Otu1025 | 8        | 4       | 2       | 2       | 3       | 0       | 0         | 0         | 0         | 0         | 4         | 0         | Bacteria; Gemmatimonadetes; Gemm-1                                                            |
| Otu1026 | 11       | 0       | 3       | 3       | 0       | 0       | 5         | 0         | 1         | 0         | 2         | 2         | Bacteria; Actinobacteria; Thermoleophilia; Solirubrobacterales                                |
| Otu1027 | 9        | 4       | 3       | 9       | 2       | 8       | 5         | 7         | 3         | 5         | 17        | 6         | Bacteria; Actinobacteria; Thermoleophilia; Gaiellales; Gaiellaceae                            |
| Otu1020 | 6        | 2       | 3       | 1       | 2       | 1       | 11        | 2         | 4         | 10        | 6         | 2         | Bacteria; Proteobacteria; Gammaproteobacteria; Legionellales; Coxiellaceae                    |
| Otu1021 | 5        | 20      | 6       | 20      | 14      | 14      | 11        | 23        | 31        | 14        | 18        | 19        | Bacteria; Chlorobi                                                                            |
| Otu1022 | 8        | 6       | 0       | 0       | 0       | 0       | 0         | 0         | 0         | 0         | 0         | 0         | Bacteria; Bacteroidetes; Cytophagia; Cytophagales; Cytophagaceae                              |
| Otu1023 | 1        | 8       | 7       | 3       | 5       | 3       | 9         | 1         | 6         | 0         | 15        | 2         | Bacteria; Actinobacteria; Thermoleophilia; Solirubrobacterales                                |
| Otu545  | 21       | 7       | 5       | 3       | 1       | 3       | 3         | 0         | 1         | 1         | 5         | 2         | Bacteria; Acidobacteria; Acidobacteria-6; iii1-15                                             |
| Otu544  | 20       | 1       | 1       | 11      | 3       | 1       | 4         | 4         | 8         | 0         | 7         | 0         | Bacteria; Armatimonadetes; Fimbriimonadia; Fimbriimonadales; Fimbriimonadaceae; Fimbriimonas  |
| Otu547  | 1        | 1       | 2       | 1       | 1       | 1       | 0         | 0         | 0         | 27        | 1         | 0         | Bacteria; Bacteroidetes; Flavobacteriia; Flavobacterales; Flavobacteriaceae; Flavobacterium   |

| #OTU ID | Z31DSO1r | Z31DSO2 | Z31DSO3 | Z31DSO4 | Z31DSO5 | Z31DSO6 | Z31JDSO1 | Z31JDSO2 | Z31JDSO3 | Z31JDSO4 | Z31JDSO5 | Z31JDSO6 | taxonomy                                                                                        |
|---------|----------|---------|---------|---------|---------|---------|----------|----------|----------|----------|----------|----------|-------------------------------------------------------------------------------------------------|
| Otu546  | 20       | 7       | 3       | 1       | 1       | 1       | 1        | 0        | 0        | 3        | 6        | 0        | Bacteria; Bacteroidetes; Cytophagia; Cytophagales; Cytophagaceae; Adhaeribacter                 |
| Otu1028 | 0        | 3       | 7       | 5       | 1       | 8       | 3        | 3        | 5        | 2        | 25       | 2        | Bacteria; Firmicutes; Clostridia; OPB54                                                         |
| Otu1029 | 7        | 0       | 2       | 2       | 1       | 4       | 4        | 0        | 1        | 4        | 1        | 2        | Bacteria; Chlorobi                                                                              |
| Otu543  | 28       | 10      | 11      | 10      | 11      | 6       | 19       | 7        | 9        | 3        | 6        | 6        | Bacteria; Proteobacteria; Gammaproteobacteria; Xanthomonadales; Sinobacteraceae; Steroidobacter |
| Otu542  | 7        | 2       | 8       | 23      | 8       | 24      | 4        | 18       | 21       | 7        | 10       | 2        | Bacteria; Chloroflexi; Anaerolineae; SBR1031; oc28                                              |
| Otu765  | 9        | 4       | 11      | 8       | 9       | 8       | 8        | 11       | 14       | 9        | 14       | 3        | Bacteria; Armatimonadetes; Chthonomonadetes; SJA-22                                             |
| Otu764  | 0        | 0       | 0       | 0       | 0       | 0       | 0        | 0        | 0        | 0        | 13       | 0        | Bacteria; Proteobacteria                                                                        |
| Otu943  | 17       | 4       | 5       | 7       | 4       | 3       | 14       | 0        | 4        | 5        | 10       | 3        | Bacteria; Proteobacteria; Alphaproteobacteria; Rhizobiales; Bradyrhizobiaceae; Balneimonas      |
| Otu766  | 0        | 3       | 1       | 5       | 2       | 1       | 3        | 1        | 1        | 14       | 2        | 0        | Bacteria; Bacteroidetes; Sphingobacteriia; Sphingobacteriales                                   |
| Otu945  | 2        | 3       | 1       | 6       | 2       | 5       | 8        | 3        | 11       | 4        | 7        | 2        | Bacteria; Proteobacteria; Deltaproteobacteria; Myxococcales                                     |
| Otu760  | 14       | 5       | 8       | 14      | 3       | 4       | 14       | 4        | 7        | 7        | 8        | 5        | Bacteria; Acidobacteria; Solibacteres; Solibacterales                                           |
| Otu947  | 4        | 6       | 6       | 11      | 0       | 2       | 2        | 2        | 7        | 18       | 5        | 11       | Bacteria; Verrucomicrobia; Pedosphaerae; Pedosphaerales                                         |
| Otu946  | 8        | 4       | 2       | 4       | 0       | 0       | 2        | 0        | 0        | 2        | 1        | 1        | Bacteria; Acidobacteria; Sva0725; Sva0725                                                       |
| Otu949  | 0        | 18      | 6       | 8       | 7       | 6       | 2        | 10       | 5        | 1        | 5        | 3        | Bacteria; Planctomycetes; C6; MVS-107                                                           |
| Otu948  | 2        | 6       | 8       | 4       | 1       | 0       | 1        | 1        | 0        | 6        | 9        | 0        | Bacteria; Proteobacteria; Deltaproteobacteria; Syntrophobacteriales; Syntrophobacteraceae       |
| Otu3274 | 0        | 0       | 0       | 0       | 0       | 2       | 0        | 0        | 1        | 0        | 0        | 0        | Bacteria; Proteobacteria; Gammaproteobacteria; Legionellales; Coxiellaceae                      |
| Otu769  | 14       | 1       | 1       | 0       | 1       | 0       | 0        | 0        | 0        | 0        | 3        | 0        | Bacteria; Planctomycetes; Phycisphaerae; WD2101                                                 |
| Otu768  | 1        | 0       | 2       | 2       | 0       | 2       | 5        | 11       | 4        | 1        | 1        | 3        | Bacteria; Bacteroidetes; Sphingobacteriia; Sphingobacteriales                                   |
| Otu3075 | 31       | 6       | 5       | 13      | 5       | 9       | 28       | 16       | 17       | 15       | 20       | 17       | Bacteria; Proteobacteria; Gammaproteobacteria; Xanthomonadales; Xanthomonadaceae                |
| Otu3074 | 0        | 0       | 0       | 0       | 4       | 0       | 0        | 0        | 0        | 0        | 0        | 1        | Bacteria; Proteobacteria; Gammaproteobacteria; Legionellales; Coxiellaceae; Aquicella           |
| Otu3077 | 0        | 0       | 0       | 0       | 0       | 0       | 1        | 0        | 0        | 1        | 2        | 0        | Bacteria; Proteobacteria; Alphaproteobacteria; Rickettsiales; mitochondria                      |
| Otu3076 | 0        | 0       | 0       | 0       | 0       | 0       | 1        | 0        | 0        | 0        | 0        | 2        | Bacteria; Proteobacteria; Gammaproteobacteria; Legionellales                                    |



| #OTU ID | Z31DSO1r | Z31DSO2 | Z31DSO3 | Z31DSO4 | Z31DSO5 | Z31DSO6 | Z31JDSO1 | Z31JDSO2 | Z31JDSO3 | Z31JDSO4 | Z31JDSO5 | Z31JDSO6 | taxonomy                                                                                            |
|---------|----------|---------|---------|---------|---------|---------|----------|----------|----------|----------|----------|----------|-----------------------------------------------------------------------------------------------------|
| Otu3071 | 2        | 0       | 0       | 0       | 0       | 0       | 0        | 0        | 0        | 0        | 0        | 0        | Bacteria                                                                                            |
| Otu3070 | 0        | 0       | 2       | 0       | 0       | 3       | 0        | 1        | 2        | 0        | 0        | 0        | Bacteria; Chloroflexi; Ktedonobacteria                                                              |
| Otu3073 | 0        | 1       | 1       | 2       | 0       | 0       | 1        | 0        | 1        | 0        | 1        | 0        | Bacteria                                                                                            |
| Otu3072 | 0        | 0       | 0       | 0       | 0       | 0       | 0        | 0        | 0        | 2        | 1        | 0        | Bacteria; Cyanobacteria; ML635J-21                                                                  |
| Otu3079 | 0        | 0       | 0       | 0       | 0       | 0       | 0        | 0        | 2        | 1        | 0        | 0        | Bacteria; Actinobacteria; Acidimicrobia; Acidimicrobiales                                           |
| Otu3078 | 12       | 0       | 0       | 2       | 2       | 1       | 0        | 1        | 1        | 4        | 3        | 1        | Bacteria; Acidobacteria; Solibacteres; Solibacterales; Solibacteraceae; Candidatus_Solibacter       |
| Otu3278 | 2        | 0       | 0       | 0       | 0       | 0       | 0        | 0        | 0        | 0        | 0        | 0        | Bacteria                                                                                            |
| Otu307  | 32       | 0       | 46      | 5       | 6       | 17      | 2        | 4        | 2        | 25       | 3        | 33       | Bacteria; Proteobacteria; Alphaproteobacteria; Sphingomonadales; Sphingomonadaceae; Novosphingobium |
| Otu306  | 2        | 8       | 3       | 7       | 5       | 2       | 18       | 3        | 13       | 47       | 5        | 4        | Bacteria; Proteobacteria; Alphaproteobacteria; Caulobacterales; Caulobacteraceae; Caulobacter       |
| Otu305  | 79       | 20      | 43      | 34      | 23      | 28      | 20       | 15       | 16       | 33       | 43       | 14       | Bacteria; Armatimonadetes; Chthonomonadetes; SJA-22                                                 |
| Otu304  | 10       | 6       | 13      | 33      | 15      | 27      | 17       | 18       | 24       | 40       | 23       | 28       | Bacteria; Verrucomicrobia; Pedosphaerae; Pedosphaerales; Ellin517                                   |
| Otu303  | 95       | 62      | 44      | 35      | 32      | 7       | 49       | 22       | 12       | 26       | 40       | 37       | Bacteria; Proteobacteria; Betaproteobacteria; Burkholderiales; Comamonadaceae; Rubrivivax           |
| Otu302  | 11       | 1       | 14      | 18      | 7       | 29      | 6        | 28       | 38       | 9        | 10       | 22       | Bacteria; Acidobacteria; Solibacteres; Solibacterales                                               |
| Otu301  | 1        | 0       | 38      | 0       | 0       | 0       | 0        | 0        | 1        | 0        | 0        | 0        | Bacteria; Bacteroidetes; Saprospirae; Saprospirales; Chitinophagaceae                               |
| Otu300  | 25       | 13      | 22      | 29      | 15      | 22      | 31       | 24       | 44       | 19       | 31       | 13       | Bacteria; Proteobacteria; Gammaproteobacteria; Xanthomonadales; Sinobacteraceae; Steroidobacter     |
| Otu2669 | 2        | 2       | 1       | 0       | 0       | 1       | 0        | 0        | 0        | 3        | 0        | 2        | Bacteria; Proteobacteria; Deltaproteobacteria                                                       |
| Otu309  | 68       | 41      | 55      | 54      | 69      | 9       | 14       | 8        | 13       | 24       | 71       | 7        | Bacteria; Planctomycetes; Phycisphaerae; WD2101                                                     |
| Otu308  | 10       | 2       | 12      | 19      | 5       | 37      | 17       | 33       | 24       | 42       | 8        | 39       | Bacteria; Verrucomicrobia; Spartobacteria; Chthoniobacterales; Chthoniobacteraceae; DA101           |
| Otu2331 | 1        | 0       | 0       | 1       | 1       | 1       | 1        | 0        | 1        | 3        | 3        | 0        | Bacteria; Proteobacteria; Gammaproteobacteria; Legionellales                                        |
| Otu2668 | 2        | 0       | 0       | 0       | 0       | 0       | 0        | 0        | 0        | 0        | 0        | 0        | Bacteria; Chloroflexi                                                                               |
| Otu2330 | 14       | 11      | 1       | 3       | 6       | 1       | 8        | 4        | 2        | 3        | 10       | 6        | Bacteria; Acidobacteria; Acidobacteria-6; iii1-15                                                   |
| Otu2333 | 0        | 0       | 1       | 1       | 0       | 0       | 1        | 0        | 0        | 2        | 1        | 0        | Bacteria; FBP                                                                                       |

| #OTU ID | Z31DSO1r | Z31DSO2 | Z31DSO3 | Z31DSO4 | Z31DSO5 | Z31DSO6 | Z31JDSO1 | Z31JDSO2 | Z31JDSO3 | Z31JDSO4 | Z31JDSO5 | Z31JDSO6 | taxonomy                                                                                   |
|---------|----------|---------|---------|---------|---------|---------|----------|----------|----------|----------|----------|----------|--------------------------------------------------------------------------------------------|
| Otu3118 | 0        | 1       | 0       | 0       | 1       | 0       | 4        | 1        | 0        | 0        | 1        | 2        | Bacteria; TM7; SC3                                                                         |
| Otu2332 | 0        | 0       | 2       | 0       | 0       | 0       | 0        | 0        | 0        | 0        | 0        | 0        | Bacteria; Proteobacteria; Alphaproteobacteria; Rhizobiales; Hyphomicrobiaceae              |
| Otu3112 | 23       | 9       | 7       | 12      | 5       | 6       | 17       | 13       | 16       | 16       | 16       | 17       | Bacteria; Proteobacteria; Deltaproteobacteria; Myxococcales; Haliangiaceae                 |
| Otu2335 | 1        | 3       | 2       | 4       | 2       | 2       | 3        | 0        | 3        | 1        | 1        | 0        | Bacteria; Proteobacteria; Gammaproteobacteria; Legionellales; Coxiellaceae                 |
| Otu3110 | 1        | 2       | 0       | 3       | 5       | 2       | 0        | 0        | 3        | 1        | 1        | 1        | Bacteria; Verrucomicrobia; Pedosphaerae; Pedosphaerales                                    |
| Otu3111 | 0        | 0       | 0       | 0       | 0       | 3       | 0        | 0        | 0        | 0        | 0        | 0        | Bacteria; Proteobacteria; Betaproteobacteria                                               |
| Otu3116 | 9        | 4       | 2       | 11      | 7       | 2       | 17       | 6        | 9        | 7        | 11       | 7        | Bacteria; Gemmatimonadetes; Gemmatimonadetes                                               |
| Otu3117 | 0        | 0       | 0       | 0       | 0       | 2       | 0        | 0        | 0        | 0        | 0        | 0        | Bacteria; Chlamydiae; Chlamydia; Chlamydiales; Parachlamydiaceae                           |
| Otu3114 | 2        | 0       | 0       | 0       | 0       | 0       | 0        | 0        | 0        | 0        | 0        | 0        | Bacteria                                                                                   |
| Otu2334 | 0        | 0       | 0       | 0       | 0       | 0       | 0        | 0        | 2        | 0        | 0        | 0        | Bacteria; Chlamydiae; Chlamydia; Chlamydiales                                              |
| Otu2418 | 0        | 0       | 0       | 0       | 1       | 0       | 1        | 0        | 1        | 2        | 0        | 2        | Bacteria; Proteobacteria; Deltaproteobacteria; Syntrophobacteriales; Syntrophobacteraceae  |
| Otu2419 | 0        | 0       | 0       | 0       | 0       | 0       | 0        | 2        | 2        | 0        | 2        | 0        | Bacteria; Proteobacteria; Gammaproteobacteria; Xanthomonadales; Sinobacteraceae            |
| Otu2337 | 1        | 0       | 0       | 5       | 0       | 2       | 0        | 2        | 4        | 4        | 2        | 3        | Bacteria; ODI; SM2F11                                                                      |
| Otu2410 | 2        | 3       | 1       | 6       | 0       | 2       | 6        | 4        | 5        | 1        | 1        | 7        | Bacteria; TM7; TM7-1                                                                       |
| Otu2411 | 0        | 2       | 2       | 1       | 2       | 1       | 1        | 0        | 1        | 0        | 0        | 0        | Bacteria; Planctomycetes; Planctomycetia; Gemmatales; Gemmataceae                          |
| Otu2412 | 0        | 0       | 0       | 0       | 0       | 1       | 0        | 0        | 0        | 0        | 3        | 0        | Bacteria; Bacteroidetes; Cytophagia; Cytophagales; Cytophagaceae; Spirosoma                |
| Otu2336 | 0        | 1       | 5       | 0       | 0       | 4       | 5        | 0        | 0        | 11       | 0        | 9        | Bacteria; Bacteroidetes; Saprospirae; Saprospirales; Chitinophagaceae                      |
| Otu2414 | 0        | 0       | 2       | 0       | 0       | 1       | 0        | 0        | 0        | 0        | 0        | 1        | Bacteria                                                                                   |
| Otu2415 | 1        | 2       | 2       | 1       | 5       | 4       | 5        | 3        | 2        | 2        | 12       | 1        | Bacteria; Firmicutes; Clostridia; Clostridiales; Clostridiaceae; Clostridium               |
| Otu2416 | 64       | 94      | 35      | 59      | 19      | 0       | 19       | 8        | 4        | 7        | 12       | 2        | Bacteria; Acidobacteria; Chloracidobacteria; RB41                                          |
| Otu2417 | 7        | 5       | 18      | 23      | 10      | 6       | 15       | 8        | 3        | 12       | 27       | 5        | Bacteria; Verrucomicrobia; Spartobacteria; Chthoniobacteriales; Chthoniobacteraceae; DA101 |
| Otu163  | 90       | 12      | 14      | 14      | 7       | 7       | 18       | 2        | 2        | 13       | 25       | 5        | Bacteria; Acidobacteria; Solibacteres; Solibacteriales                                     |



| #OTU ID | Z31DSO1r | Z31DSO2 | Z31DSO3 | Z31DSO4 | Z31DSO5 | Z31DSO6 | Z31JDSO1 | Z31JDSO2 | Z31JDSO3 | Z31JDSO4 | Z31JDSO5 | Z31JDSO6 | taxonomy                                                                              |
|---------|----------|---------|---------|---------|---------|---------|----------|----------|----------|----------|----------|----------|---------------------------------------------------------------------------------------|
| Otu1920 | 1        | 4       | 0       | 0       | 1       | 0       | 0        | 0        | 0        | 0        | 2        | 0        | Bacteria; Gemmatimonadetes; Gemmatimonadetes                                          |
| Otu3207 | 2        | 0       | 0       | 1       | 0       | 4       | 1        | 1        | 1        | 2        | 0        | 0        | Bacteria; Armatimonadetes; 0319-6E2                                                   |
| Otu3204 | 10       | 4       | 2       | 0       | 0       | 0       | 2        | 0        | 1        | 1        | 1        | 1        | Bacteria; Acidobacteria; Acidobacteria-6; iii1-15                                     |
| Otu3205 | 0        | 0       | 0       | 2       | 0       | 0       | 0        | 0        | 0        | 1        | 0        | 0        | Bacteria; Proteobacteria; Gammaproteobacteria; Pseudomonadales; Pseudomonadaceae      |
| Otu3202 | 0        | 1       | 1       | 1       | 2       | 0       | 0        | 1        | 5        | 1        | 1        | 3        | Bacteria; Proteobacteria; Betaproteobacteria; Burkholderiales                         |
| Otu3172 | 0        | 0       | 0       | 0       | 0       | 1       | 0        | 0        | 0        | 0        | 2        | 0        | Bacteria; Chlamydiae; Chlamydia; Chlamydiales                                         |
| Otu3200 | 0        | 0       | 2       | 2       | 0       | 0       | 0        | 0        | 1        | 0        | 0        | 1        | Bacteria                                                                              |
| Otu2986 | 0        | 0       | 0       | 0       | 1       | 0       | 3        | 0        | 1        | 0        | 1        | 0        | Bacteria; Chlamydiae; Chlamydia; Chlamydiales                                         |
| Otu3173 | 1        | 0       | 0       | 1       | 0       | 1       | 1        | 1        | 1        | 2        | 1        | 2        | Bacteria; Actinobacteria; Actinobacteria; Actinomycetales                             |
| Otu3208 | 0        | 1       | 0       | 2       | 0       | 0       | 3        | 1        | 0        | 0        | 2        | 0        | Bacteria; Actinobacteria; Acidimicrobia; Acidimicrobiales; EB1017                     |
| Otu3209 | 0        | 0       | 0       | 0       | 1       | 1       | 1        | 0        | 0        | 3        | 3        | 1        | Bacteria; Planctomycetes; Planctomycetia; Gemmatales; Gemmataceae                     |
| Otu2304 | 0        | 0       | 1       | 0       | 0       | 1       | 0        | 0        | 0        | 0        | 2        | 0        | Bacteria; Firmicutes; Clostridia; OPB54                                               |
| Otu2305 | 0        | 4       | 1       | 0       | 1       | 4       | 0        | 1        | 1        | 1        | 2        | 6        | Bacteria; Planctomycetes; Phycisphaerae; CPLa-3                                       |
| Otu2306 | 0        | 1       | 0       | 2       | 1       | 1       | 2        | 0        | 0        | 2        | 1        | 1        | Bacteria; Planctomycetes; Planctomycetia; Gemmatales; Gemmataceae                     |
| Otu2307 | 0        | 2       | 0       | 7       | 4       | 4       | 3        | 0        | 1        | 5        | 4        | 1        | Bacteria; Proteobacteria; Gammaproteobacteria; Legionellales; Coxiellaceae; Aquicella |
| Otu2300 | 2        | 3       | 2       | 0       | 1       | 0       | 0        | 0        | 0        | 0        | 2        | 0        | Bacteria; Proteobacteria; Betaproteobacteria; SC-I-84                                 |
| Otu2301 | 0        | 0       | 0       | 5       | 1       | 1       | 5        | 0        | 1        | 1        | 0        | 1        | Bacteria; Proteobacteria; Gammaproteobacteria; Legionellales; Coxiellaceae; Aquicella |
| Otu2302 | 1        | 0       | 3       | 3       | 0       | 0       | 1        | 1        | 0        | 0        | 2        | 0        | Bacteria; Planctomycetes; Planctomycetia; Gemmatales; Gemmataceae                     |
| Otu2303 | 0        | 0       | 2       | 0       | 2       | 3       | 2        | 0        | 0        | 0        | 0        | 0        | Bacteria; Chloroflexi                                                                 |
| Otu2308 | 2        | 0       | 0       | 0       | 0       | 0       | 0        | 0        | 0        | 0        | 0        | 0        | Bacteria; Acidobacteria; S035                                                         |
| Otu2309 | 0        | 0       | 0       | 3       | 1       | 0       | 1        | 1        | 0        | 1        | 3        | 0        | Bacteria; Proteobacteria; Gammaproteobacteria; Legionellales                          |
| Otu3219 | 2        | 4       | 4       | 3       | 1       | 1       | 0        | 0        | 0        | 1        | 1        | 0        | Bacteria; Actinobacteria; Actinobacteria                                              |

| #OTU ID | Z31DSO1r | Z31DSO2 | Z31DSO3 | Z31DSO4 | Z31DSO5 | Z31DSO6 | Z31JDSO1 | Z31JDSO2 | Z31JDSO3 | Z31JDSO4 | Z31JDSO5 | Z31JDSO6 | taxonomy                                                                                                                            |
|---------|----------|---------|---------|---------|---------|---------|----------|----------|----------|----------|----------|----------|-------------------------------------------------------------------------------------------------------------------------------------|
| Otu2249 | 0        | 0       | 2       | 0       | 0       | 0       | 0        | 1        | 0        | 0        | 0        | 0        | Bacteria; Proteobacteria; Alphaproteobacteria                                                                                       |
| Otu2248 | 0        | 1       | 1       | 1       | 0       | 2       | 1        | 2        | 2        | 0        | 0        | 0        | Bacteria; Planctomycetes; Planctomycetia; Gemmatales; Gemmataceae                                                                   |
| Otu2241 | 2        | 0       | 0       | 2       | 0       | 0       | 1        | 0        | 0        | 0        | 0        | 1        | Bacteria; Proteobacteria; Deltaproteobacteria                                                                                       |
| Otu2240 | 2        | 0       | 0       | 0       | 0       | 0       | 0        | 0        | 0        | 0        | 0        | 0        | Bacteria; Acidobacteria                                                                                                             |
| Otu2243 | 0        | 0       | 0       | 0       | 0       | 0       | 0        | 0        | 0        | 2        | 0        | 0        | Bacteria; Actinobacteria; Acidimicrobia; Acidimicrobiales                                                                           |
| Otu2242 | 0        | 1       | 2       | 0       | 1       | 1       | 0        | 0        | 0        | 0        | 1        | 0        | Bacteria; Proteobacteria; Gammaproteobacteria; Xanthomonadales; Sinobacteraceae; Steriodobacter                                     |
| Otu2245 | 8        | 1       | 0       | 2       | 1       | 6       | 3        | 3        | 7        | 9        | 4        | 3        | Bacteria; Cyanobacteria; 4C0d-2; MLE1-12                                                                                            |
| Otu2244 | 4        | 0       | 0       | 0       | 0       | 1       | 0        | 0        | 0        | 1        | 1        | 1        | Bacteria; Chlamydiae; Chlamydiia                                                                                                    |
| Otu2247 | 4        | 2       | 3       | 0       | 1       | 0       | 1        | 1        | 0        | 0        | 0        | 1        | Bacteria; Planctomycetes; Phycisphaerae; WD2101                                                                                     |
| Otu2246 | 0        | 4       | 0       | 0       | 1       | 0       | 0        | 0        | 0        | 2        | 1        | 1        | Bacteria                                                                                                                            |
| Otu1506 | 278      | 86      | 167     | 302     | 125     | 151     | 232      | 202      | 236      | 353      | 305      | 227      | Bacteria; Acidobacteria; Acidobacteriia; Acidobacteriales; Koribacteraceae                                                          |
| Otu3170 | 5        | 1       | 2       | 3       | 1       | 0       | 2        | 1        | 3        | 1        | 3        | 0        | Bacteria; Proteobacteria; Gammaproteobacteria; Legionellales                                                                        |
| Otu3358 | 0        | 0       | 0       | 2       | 0       | 1       | 3        | 1        | 0        | 1        | 0        | 0        | Bacteria; Proteobacteria; Alphaproteobacteria; Rhodospirillales                                                                     |
| Otu1031 | 10       | 2       | 3       | 5       | 2       | 0       | 3        | 3        | 1        | 0        | 2        | 1        | Bacteria; Planctomycetes; Planctomycetia; Planctomycetales; Planctomycetaceae; Planctomyces                                         |
| Otu1030 | 4        | 0       | 7       | 9       | 10      | 4       | 2        | 0        | 0        | 10       | 6        | 0        | Bacteria; Chloroflexi; Anaerolineae; CFB-26                                                                                         |
| Otu72   | 179      | 63      | 30      | 63      | 29      | 28      | 58       | 43       | 62       | 65       | 51       | 35       | Bacteria; Proteobacteria; Betaproteobacteria; MND1                                                                                  |
| Otu73   | 121      | 58      | 119     | 105     | 45      | 88      | 169      | 129      | 195      | 172      | 74       | 144      | Bacteria; Proteobacteria; Betaproteobacteria; Burkholderiales; Oxalobacteraceae; Ralstonia                                          |
| Otu70   | 40       | 23      | 126     | 52      | 27      | 91      | 91       | 70       | 58       | 24       | 168      | 70       | Bacteria; Actinobacteria; Actinobacteria; Actinomycetales; Frankiaceae                                                              |
| Otu71   | 98       | 118     | 103     | 95      | 37      | 31      | 454      | 71       | 45       | 218      | 35       | 462      | Bacteria; Bacteroidetes; Sphingobacteriia; Sphingobacteriales; Sphingobacteriaceae; Pedobacter                                      |
| Otu76   | 156      | 77      | 73      | 158     | 41      | 64      | 203      | 87       | 134      | 194      | 115      | 127      | Bacteria; Proteobacteria; Alphaproteobacteria; Sphingomonadales; Sphingomonadaceae; Kaistobacter                                    |
| Otu77   | 93       | 13      | 47      | 126     | 27      | 67      | 118      | 149      | 99       | 77       | 81       | 111      | Bacteria; Acidobacteria; Acidobacteriia; Acidobacteriales; Koribacteraceae; Candidatus_Koribacter; Candidatus_Koribacter_versatilis |
| Otu74   | 149      | 142     | 152     | 318     | 134     | 132     | 156      | 134      | 150      | 160      | 216      | 154      | Bacteria; Verrucomicrobia; Pedosphaerae; Pedosphaerales; Ellin517                                                                   |

| #OTU ID | Z31DSO1r | Z31DSO2 | Z31DSO3 | Z31DSO4 | Z31DSO5 | Z31DSO6 | Z31J1DSO1 | Z31J1DSO2 | Z31J1DSO3 | Z31J1DSO4 | Z31J1DSO5 | Z31J1DSO6 | taxonomy                                                                                      |
|---------|----------|---------|---------|---------|---------|---------|-----------|-----------|-----------|-----------|-----------|-----------|-----------------------------------------------------------------------------------------------|
| Otu75   | 356      | 76      | 95      | 134     | 61      | 61      | 126       | 92        | 111       | 77        | 94        | 74        | Bacteria; Acidobacteria; Solibacteres; Solibacterales; Solibacteraceae; Candidatus_Solibacter |
| Otu1525 | 1        | 3       | 5       | 2       | 1       | 3       | 4         | 1         | 5         | 2         | 5         | 1         | Bacteria; Proteobacteria; Deltaproteobacteria; MIZ46                                          |
| Otu1524 | 6        | 1       | 1       | 1       | 1       | 2       | 1         | 2         | 0         | 2         | 2         | 1         | Bacteria; FBP                                                                                 |
| Otu78   | 154      | 57      | 36      | 67      | 61      | 24      | 71        | 26        | 38        | 52        | 84        | 43        | Bacteria; Planctomycetes; Phycisphaerae; WD2101                                               |
| Otu79   | 166      | 64      | 45      | 67      | 48      | 53      | 36        | 21        | 9         | 85        | 96        | 20        | Bacteria; Bacteroidetes; Saprospirae; Saprospirales; Chitinophagaceae                         |
| Otu1521 | 5        | 2       | 4       | 6       | 2       | 0       | 2         | 4         | 3         | 4         | 7         | 3         | Bacteria; Elusimicrobia; Elusimicrobia; FAC88                                                 |
| Otu1520 | 2        | 2       | 1       | 0       | 1       | 2       | 2         | 6         | 6         | 5         | 4         | 5         | Bacteria; Elusimicrobia; Elusimicrobia; I1b                                                   |
| Otu1523 | 6        | 3       | 1       | 2       | 3       | 1       | 1         | 3         | 1         | 1         | 3         | 0         | Bacteria; Acidobacteria; Acidobacteria-6; CCU21                                               |
| Otu1522 | 3        | 2       | 2       | 0       | 4       | 0       | 0         | 0         | 2         | 0         | 6         | 0         | Bacteria                                                                                      |
| Otu2256 | 0        | 2       | 2       | 3       | 1       | 2       | 3         | 1         | 1         | 1         | 3         | 1         | Bacteria; Actinobacteria; Thermoleophilia; Solirubrobacterales; Conexibacteraceae             |
| Otu2257 | 1        | 0       | 1       | 1       | 0       | 0       | 1         | 0         | 0         | 2         | 0         | 0         | Bacteria; Chlamydiae; Chlamydia; Chlamydiales                                                 |
| Otu3218 | 2        | 3       | 0       | 2       | 6       | 1       | 0         | 0         | 3         | 1         | 3         | 0         | Bacteria; Proteobacteria; Alphaproteobacteria; Rhodospirillales; Rhodospirillaceae            |
| Otu1561 | 32       | 18      | 17      | 13      | 17      | 19      | 26        | 25        | 3         | 23        | 28        | 12        | Bacteria; Proteobacteria; Betaproteobacteria; Burkholderiales; Comamonadaceae                 |
| Otu1039 | 2        | 0       | 0       | 1       | 0       | 0       | 0         | 0         | 2         | 11        | 0         | 2         | Bacteria                                                                                      |
| Otu1560 | 0        | 0       | 2       | 7       | 0       | 0       | 2         | 0         | 3         | 0         | 0         | 0         | Bacteria; Proteobacteria; Gammaproteobacteria; Legionellales; Coxiellaceae; Coxiella          |
| Otu2159 | 11       | 9       | 6       | 3       | 3       | 13      | 1         | 3         | 7         | 3         | 8         | 5         | Bacteria; WS3; PRR-12; Sediment-1                                                             |
| Otu1038 | 8        | 3       | 2       | 4       | 1       | 3       | 12        | 5         | 6         | 7         | 6         | 12        | Bacteria; Proteobacteria; Gammaproteobacteria; Xanthomonadales; Sinobacteraceae               |
| Otu1563 | 7        | 2       | 2       | 5       | 0       | 1       | 11        | 3         | 2         | 3         | 4         | 9         | Bacteria; Gemmatimonadetes; Gemmatimonadetes; Gemmatimonadales                                |
| Otu2158 | 1        | 0       | 1       | 5       | 0       | 3       | 3         | 1         | 3         | 1         | 4         | 1         | Bacteria; Elusimicrobia; Elusimicrobia; I1b                                                   |
| Otu2937 | 2        | 0       | 0       | 0       | 0       | 0       | 0         | 0         | 0         | 0         | 0         | 0         | Bacteria; Planctomycetes; Planctomycetia; Gemmatales; Gemmataceae; Gemmata                    |
| Otu952  | 0        | 1       | 1       | 4       | 3       | 7       | 5         | 7         | 2         | 8         | 0         | 1         | Bacteria; Proteobacteria; Alphaproteobacteria                                                 |
| Otu2935 | 50       | 22      | 5       | 44      | 22      | 38      | 39        | 49        | 103       | 51        | 21        | 50        | Bacteria; Bacteroidetes; Cytophagia; Cytophagales; Cytophagaceae                              |

| #OTU ID | Z31DSO1r | Z31DSO2 | Z31DSO3 | Z31DSO4 | Z31DSO5 | Z31DSO6 | Z31JDSO1 | Z31JDSO2 | Z31JDSO3 | Z31JDSO4 | Z31JDSO5 | Z31JDSO6 | taxonomy                                                                                    |
|---------|----------|---------|---------|---------|---------|---------|----------|----------|----------|----------|----------|----------|---------------------------------------------------------------------------------------------|
| Otu1562 | 0        | 2       | 3       | 0       | 0       | 0       | 6        | 1        | 3        | 0        | 5        | 2        | Bacteria; Firmicutes; Clostridia; Clostridiales; Clostridiaceae                             |
| Otu2933 | 57       | 109     | 20      | 31      | 19      | 6       | 70       | 10       | 0        | 1        | 3        | 85       | Bacteria; Bacteroidetes; Sphingobacteriia; Sphingobacteriales; Sphingobacteriaceae          |
| Otu2932 | 1        | 0       | 2       | 1       | 0       | 0       | 2        | 0        | 0        | 0        | 0        | 0        | Bacteria; Planctomycetes; Planctomycetia; Gemmatales; Isosphaeraeaceae                      |
| Otu2931 | 2        | 0       | 0       | 0       | 1       | 0       | 0        | 0        | 0        | 0        | 0        | 0        | Bacteria; TM6; SJA-4                                                                        |
| Otu953  | 18       | 17      | 17      | 16      | 5       | 7       | 12       | 2        | 3        | 6        | 15       | 2        | Bacteria; Planctomycetes; Phycisphaerae; WD2101                                             |
| Otu1565 | 0        | 0       | 0       | 0       | 0       | 0       | 0        | 0        | 0        | 4        | 0        | 0        | Bacteria; Proteobacteria                                                                    |
| Otu950  | 0        | 13      | 1       | 4       | 0       | 0       | 0        | 0        | 0        | 0        | 0        | 0        | Bacteria; Acidobacteria                                                                     |
| Otu2939 | 2        | 1       | 3       | 0       | 2       | 0       | 0        | 0        | 1        | 0        | 2        | 1        | Bacteria; Planctomycetes; Planctomycetia; Gemmatales; Gemmataceae; Gemmata                  |
| Otu1564 | 5        | 7       | 3       | 2       | 0       | 0       | 3        | 1        | 0        | 1        | 0        | 1        | Bacteria; Proteobacteria; Gammaproteobacteria                                               |
| Otu951  | 1        | 2       | 1       | 0       | 1       | 10      | 1        | 5        | 10       | 0        | 0        | 2        | Bacteria; Verrucomicrobia; Pedosphaerae; Pedosphaerales; auto67_4W                          |
| Otu2448 | 2        | 0       | 0       | 0       | 0       | 0       | 0        | 0        | 0        | 0        | 0        | 0        | Bacteria                                                                                    |
| Otu1567 | 3        | 2       | 0       | 5       | 3       | 4       | 3        | 0        | 1        | 6        | 5        | 1        | Bacteria; Planctomycetes; Planctomycetia; Planctomycetales; Planctomycetaceae; Planctomyces |
| Otu956  | 14       | 8       | 4       | 15      | 5       | 8       | 5        | 8        | 12       | 11       | 5        | 13       | Bacteria; Bacteroidetes; Saprospirae; Saprospirales; Chitinophagaceae                       |
| Otu1566 | 0        | 2       | 0       | 0       | 2       | 0       | 0        | 1        | 0        | 0        | 6        | 0        | Bacteria; Proteobacteria; Alphaproteobacteria; Rickettsiales; mitochondria                  |
| Otu2157 | 3        | 0       | 0       | 1       | 0       | 0       | 0        | 0        | 0        | 1        | 0        | 0        | Bacteria; Planctomycetes; Phycisphaerae; WD2101                                             |
| Otu957  | 4        | 0       | 2       | 1       | 3       | 5       | 10       | 3        | 2        | 5        | 4        | 4        | Bacteria; TM7; SC3                                                                          |
| Otu1239 | 10       | 4       | 7       | 12      | 6       | 8       | 14       | 3        | 11       | 14       | 12       | 6        | Bacteria; Proteobacteria; Alphaproteobacteria; Rhodospirillales; Rhodospirillaceae          |
| Otu1238 | 9        | 5       | 1       | 4       | 1       | 0       | 1        | 1        | 0        | 3        | 1        | 1        | Bacteria; Planctomycetes; Planctomycetia; Gemmatales; Gemmataceae; Gemmata                  |
| Otu2156 | 2        | 2       | 0       | 1       | 2       | 1       | 6        | 0        | 1        | 0        | 0        | 1        | Bacteria; Actinobacteria; Thermoleophilia; Solirubrobacterales; Conexibacteraceae           |
| Otu770  | 0        | 1       | 7       | 11      | 2       | 0       | 4        | 1        | 6        | 1        | 9        | 1        | Bacteria; Proteobacteria; Gammaproteobacteria; Legionellales                                |
| Otu1231 | 5        | 7       | 0       | 20      | 7       | 3       | 2        | 5        | 7        | 5        | 12       | 11       | Bacteria; Proteobacteria; Gammaproteobacteria; Legionellales; Coxiellaceae                  |
| Otu1230 | 3        | 1       | 3       | 9       | 1       | 4       | 5        | 9        | 5        | 7        | 7        | 4        | Bacteria; Armatimonadetes; Armatimonadia; FW68                                              |

| #OTU ID | Z31DSO1r | Z31DSO2 | Z31DSO3 | Z31DSO4 | Z31DSO5 | Z31DSO6 | Z31JDSO1 | Z31JDSO2 | Z31JDSO3 | Z31JDSO4 | Z31JDSO5 | Z31JDSO6 | taxonomy                                                                                     |
|---------|----------|---------|---------|---------|---------|---------|----------|----------|----------|----------|----------|----------|----------------------------------------------------------------------------------------------|
| Otu1233 | 6        | 5       | 2       | 0       | 1       | 0       | 3        | 1        | 5        | 2        | 6        | 3        | Bacteria; Proteobacteria; Alphaproteobacteria; Rhizobiales                                   |
| Otu771  | 0        | 6       | 12      | 5       | 0       | 1       | 1        | 0        | 0        | 0        | 2        | 2        | Bacteria; Gemmatimonadetes; Gemm-1                                                           |
| Otu1235 | 5        | 7       | 4       | 3       | 3       | 2       | 9        | 1        | 3        | 0        | 3        | 0        | Bacteria; Proteobacteria; Alphaproteobacteria; Caulobacteriales; Caulobacteraceae            |
| Otu1234 | 0        | 8       | 0       | 0       | 0       | 0       | 0        | 0        | 0        | 0        | 0        | 0        | Bacteria; Proteobacteria; Gammaproteobacteria; Oceanospirillales                             |
| Otu1237 | 4        | 0       | 0       | 11      | 0       | 1       | 3        | 1        | 6        | 2        | 5        | 1        | Bacteria; Gemmatimonadetes; Gemmatimonadetes; Gemmatimonadales                               |
| Otu1236 | 6        | 1       | 5       | 4       | 5       | 1       | 0        | 0        | 2        | 4        | 4        | 0        | Bacteria; Verrucomicrobia; Pedosphaerae; Pedosphaerales                                      |
| Otu893  | 6        | 4       | 3       | 8       | 0       | 3       | 14       | 0        | 2        | 20       | 0        | 1        | Bacteria; Bacteroidetes; Saprospirae; Saprospirales; Chitinophagaceae; Niabella              |
| Otu2258 | 0        | 0       | 0       | 1       | 0       | 2       | 0        | 0        | 0        | 0        | 0        | 0        | Bacteria; Proteobacteria; Alphaproteobacteria; Rhodospirillales; Rhodospirillaceae           |
| Otu892  | 3        | 2       | 4       | 3       | 12      | 2       | 0        | 1        | 1        | 2        | 13       | 1        | Bacteria; Proteobacteria; Deltaproteobacteria; Myxococcales; Myxococcaceae; Anaeromyxobacter |
| Otu2259 | 2        | 1       | 3       | 2       | 1       | 0       | 1        | 2        | 3        | 0        | 1        | 1        | Bacteria; Planctomycetes; Phycisphaerae; WD2101                                              |
| Otu891  | 8        | 0       | 0       | 5       | 2       | 0       | 0        | 1        | 0        | 0        | 3        | 1        | Bacteria; Bacteroidetes; Sphingobacteriia; Sphingobacteriales                                |
| Otu890  | 1        | 6       | 1       | 1       | 1       | 2       | 1        | 3        | 2        | 8        | 0        | 5        | Bacteria; Bacteroidetes; Sphingobacteriia; Sphingobacteriales                                |
| Otu897  | 0        | 2       | 3       | 2       | 0       | 1       | 0        | 0        | 0        | 0        | 9        | 2        | Bacteria; Cyanobacteria; Chloroplast                                                         |
| Otu896  | 1        | 0       | 0       | 0       | 1       | 8       | 2        | 3        | 0        | 7        | 2        | 3        | Bacteria; TM7; SC3                                                                           |
| Otu3448 | 1        | 0       | 0       | 0       | 1       | 0       | 1        | 0        | 0        | 0        | 2        | 0        | Bacteria; Proteobacteria; Deltaproteobacteria; Myxococcales; OM27                            |
| Otu671  | 6        | 2       | 3       | 4       | 2       | 2       | 12       | 15       | 18       | 3        | 4        | 5        | Bacteria; Proteobacteria; Deltaproteobacteria; Myxococcales; Myxococcaceae                   |
| Otu3444 | 20       | 12      | 16      | 50      | 9       | 6       | 52       | 51       | 11       | 155      | 10       | 48       | Bacteria; Bacteroidetes; Flavobacteriia; Flavobacteriales; Weeksellaceae; Chryseobacterium   |
| Otu3445 | 0        | 0       | 0       | 0       | 0       | 0       | 0        | 0        | 0        | 0        | 2        | 0        | Bacteria; Bacteroidetes; Cytophagia; Cytophagales; Amoebophilaceae; SC3-56                   |
| Otu3446 | 2        | 0       | 1       | 1       | 1       | 0       | 0        | 0        | 0        | 0        | 0        | 1        | Bacteria; Planctomycetes; Planctomycetia; Gemmatales; Gemmataceae; Gemmata                   |
| Otu894  | 43       | 13      | 13      | 16      | 11      | 10      | 3        | 3        | 2        | 7        | 15       | 2        | Bacteria; Bacteroidetes; Saprospirae; Saprospirales; Chitinophagaceae                        |
| Otu3440 | 2        | 0       | 0       | 0       | 0       | 0       | 0        | 0        | 0        | 0        | 0        | 0        | Bacteria; Actinobacteria; MB-A2-108; 0319-7L14                                               |
| Otu3441 | 0        | 0       | 0       | 0       | 0       | 0       | 0        | 0        | 0        | 0        | 2        | 0        | Bacteria; OD1; SM2F11                                                                        |



| #OTU ID | Z31DSO1r | Z31DSO2 | Z31DSO3 | Z31DSO4 | Z31DSO5 | Z31DSO6 | Z31JDSO1 | Z31JDSO2 | Z31JDSO3 | Z31JDSO4 | Z31JDSO5 | Z31JDSO6 | taxonomy                                                                                                  |
|---------|----------|---------|---------|---------|---------|---------|----------|----------|----------|----------|----------|----------|-----------------------------------------------------------------------------------------------------------|
| Otu3442 | 0        | 0       | 0       | 3       | 0       | 0       | 0        | 0        | 0        | 0        | 1        | 0        | Bacteria; Actinobacteria; MB-A2-108; 0319-7L14                                                            |
| Otu3443 | 2        | 0       | 0       | 0       | 0       | 0       | 0        | 0        | 0        | 0        | 0        | 0        | Bacteria; OD1; SM2F11                                                                                     |
| Otu1305 | 8        | 2       | 4       | 3       | 4       | 1       | 0        | 1        | 6        | 1        | 3        | 0        | Bacteria; Proteobacteria; Deltaproteobacteria; Myxococcales                                               |
| Otu1304 | 9        | 9       | 3       | 2       | 0       | 1       | 3        | 3        | 1        | 4        | 6        | 3        | Bacteria; Armatimonadetes; 0319-6E2                                                                       |
| Otu1307 | 3        | 3       | 7       | 21      | 7       | 3       | 11       | 3        | 19       | 9        | 20       | 2        | Bacteria; Proteobacteria; Gammaproteobacteria; Legionellales; Coxiellaceae; Aquicella                     |
| Otu1301 | 5        | 2       | 0       | 4       | 2       | 0       | 1        | 1        | 2        | 1        | 1        | 1        | Bacteria; Armatimonadetes; 0319-6E2                                                                       |
| Otu1300 | 2        | 0       | 4       | 1       | 6       | 3       | 2        | 2        | 3        | 1        | 3        | 1        | Bacteria                                                                                                  |
| Otu1303 | 8        | 0       | 0       | 0       | 0       | 0       | 0        | 0        | 0        | 0        | 0        | 0        | Bacteria; Planctomycetes; Planctomycetia; Gemmatales; Gemmataceae; Gemmata                                |
| Otu1302 | 11       | 1       | 4       | 7       | 2       | 2       | 14       | 2        | 2        | 2        | 3        | 3        | Bacteria; Chloroflexi; TK10; B07_WMSP1                                                                    |
| Otu1309 | 0        | 1       | 1       | 2       | 2       | 7       | 2        | 4        | 2        | 2        | 2        | 6        | Bacteria; Actinobacteria; Actinobacteria; Actinomycetales                                                 |
| Otu1308 | 16       | 5       | 8       | 23      | 4       | 19      | 38       | 29       | 27       | 12       | 28       | 18       | Bacteria; Actinobacteria; Actinobacteria; Actinomycetales                                                 |
| Otu2649 | 1        | 0       | 1       | 0       | 1       | 2       | 2        | 2        | 0        | 0        | 2        | 0        | Bacteria; Firmicutes; Erysipelotrichi; Erysipelotrichales; Erysipelotrichaceae                            |
| Otu2648 | 0        | 0       | 0       | 0       | 0       | 1       | 0        | 1        | 1        | 2        | 0        | 0        | Bacteria; Actinobacteria; Acidimicrobia; Acidimicrobiales                                                 |
| Otu2645 | 0        | 0       | 2       | 0       | 0       | 0       | 0        | 0        | 0        | 1        | 1        | 1        | Bacteria; Proteobacteria; Gammaproteobacteria                                                             |
| Otu2644 | 0        | 2       | 0       | 1       | 1       | 1       | 1        | 0        | 0        | 0        | 2        | 0        | Bacteria; Actinobacteria; Actinobacteria; Micrococcales                                                   |
| Otu2647 | 1        | 4       | 0       | 2       | 4       | 0       | 1        | 2        | 3        | 0        | 1        | 0        | Bacteria; Bacteroidetes                                                                                   |
| Otu2646 | 2        | 0       | 0       | 2       | 1       | 0       | 1        | 1        | 0        | 2        | 1        | 1        | Bacteria; Actinobacteria; Acidimicrobia; Acidimicrobiales                                                 |
| Otu2641 | 2        | 0       | 2       | 1       | 0       | 0       | 0        | 0        | 0        | 0        | 0        | 0        | Bacteria; Proteobacteria                                                                                  |
| Otu2640 | 5        | 1       | 0       | 1       | 1       | 1       | 1        | 1        | 1        | 1        | 1        | 2        | Bacteria; Chloroflexi; Ellin6529                                                                          |
| Otu2643 | 0        | 0       | 0       | 2       | 0       | 1       | 0        | 0        | 0        | 0        | 0        | 0        | Bacteria; Proteobacteria; Gammaproteobacteria; Legionellales; Coxiellaceae                                |
| Otu2642 | 0        | 0       | 1       | 0       | 0       | 1       | 2        | 0        | 0        | 0        | 0        | 2        | Bacteria; Proteobacteria; Betaproteobacteria; Burkholderiales; Burkholderiaceae; Candidatus_Glomeribacter |
| Otu3300 | 0        | 0       | 1       | 2       | 1       | 0       | 0        | 0        | 0        | 0        | 1        | 0        | Bacteria; Planctomycetes; Planctomycetia; Gemmatales; Gemmataceae                                         |

| #OTU ID | Z31DSO1r | Z31DSO2 | Z31DSO3 | Z31DSO4 | Z31DSO5 | Z31DSO6 | Z31J1DSO1 | Z31J1DSO2 | Z31J1DSO3 | Z31J1DSO4 | Z31J1DSO5 | Z31J1DSO6 | taxonomy                                                                                                 |
|---------|----------|---------|---------|---------|---------|---------|-----------|-----------|-----------|-----------|-----------|-----------|----------------------------------------------------------------------------------------------------------|
| Otu3416 | 3        | 0       | 0       | 0       | 0       | 0       | 0         | 0         | 0         | 0         | 0         | 0         | Bacteria; Chloroflexi; Anaerolineae; SBR1031; A4b                                                        |
| Otu1011 | 8        | 4       | 4       | 7       | 0       | 3       | 10        | 4         | 1         | 12        | 1         | 7         | Bacteria; Proteobacteria; Alphaproteobacteria; Sphingomonadales; Erythrobacteraceae                      |
| Otu1010 | 5        | 4       | 1       | 6       | 0       | 0       | 6         | 5         | 1         | 2         | 8         | 8         | Bacteria; TM7; SC3                                                                                       |
| Otu1013 | 12       | 5       | 0       | 1       | 0       | 0       | 0         | 0         | 0         | 1         | 1         | 0         | Bacteria; Proteobacteria; Alphaproteobacteria; Rhodospirillales; Rhodospirillaceae                       |
| Otu1012 | 5        | 20      | 10      | 17      | 3       | 0       | 5         | 0         | 4         | 5         | 3         | 5         | Bacteria; Verrucomicrobia; Pedosphaerae; Pedosphaerales; auto67_4W                                       |
| Otu1015 | 4        | 8       | 1       | 0       | 1       | 0       | 0         | 0         | 0         | 5         | 7         | 2         | Bacteria; Chlamydiae; Chlamydia; Chlamydiales                                                            |
| Otu1014 | 8        | 2       | 4       | 4       | 0       | 3       | 3         | 7         | 3         | 5         | 1         | 12        | Bacteria; Acidobacteria; EC1113                                                                          |
| Otu1017 | 1        | 1       | 2       | 5       | 1       | 4       | 16        | 5         | 4         | 5         | 1         | 4         | Bacteria; TM7; SC3                                                                                       |
| Otu1016 | 0        | 0       | 0       | 0       | 7       | 0       | 1         | 0         | 0         | 0         | 5         | 0         | Bacteria; Acidobacteria; Chloracidobacteria                                                              |
| Otu570  | 3        | 6       | 12      | 4       | 1       | 11      | 0         | 2         | 3         | 6         | 4         | 17        | Bacteria; Spirochaetes; Spirochaetes; Spirochaetales; Spirochaetaceae; Spirochaeta; Spirochaeta_aurantia |
| Otu571  | 5        | 10      | 18      | 17      | 11      | 10      | 4         | 1         | 6         | 19        | 17        | 3         | Bacteria; Armatimonadetes; Fimbriimonadia; Fimbriimonadales; Fimbriimonadaceae; Fimbriimonas             |
| Otu572  | 66       | 31      | 62      | 42      | 21      | 21      | 58        | 24        | 19        | 54        | 32        | 23        | Bacteria; Bacteroidetes; Saprospirae; Saprospirales; Chitinophagaceae; Niastella                         |
| Otu573  | 20       | 5       | 10      | 11      | 11      | 10      | 18        | 4         | 10        | 11        | 26        | 5         | Bacteria; Chloroflexi; Anaerolineae; Caldilineales; Caldilineaceae                                       |
| Otu574  | 23       | 19      | 16      | 22      | 11      | 4       | 17        | 1         | 5         | 5         | 11        | 5         | Bacteria; Planctomycetes; Phycisphaerae; WD2101                                                          |
| Otu575  | 4        | 1       | 0       | 17      | 2       | 0       | 0         | 1         | 0         | 1         | 0         | 0         | Bacteria; Proteobacteria; Betaproteobacteria                                                             |
| Otu576  | 4        | 4       | 1       | 4       | 3       | 0       | 19        | 3         | 4         | 5         | 1         | 2         | Bacteria; Chlamydiae; Chlamydia; Chlamydiales                                                            |
| Otu577  | 16       | 1       | 4       | 4       | 14      | 5       | 1         | 0         | 0         | 8         | 2         | 3         | Bacteria; Bacteroidetes; Sphingobacteria; Sphingobacteriales                                             |
| Otu750  | 30       | 19      | 16      | 13      | 15      | 14      | 14        | 1         | 16        | 16        | 29        | 16        | Bacteria; Proteobacteria; Alphaproteobacteria; Rhizobiales; Hyphomicrobiaceae; Hyphomicrobium            |
| Otu751  | 5        | 0       | 0       | 5       | 1       | 10      | 5         | 2         | 14        | 13        | 4         | 5         | Bacteria; Proteobacteria; Alphaproteobacteria; Rhodospirillales; Acetobacteraceae                        |
| Otu752  | 0        | 2       | 0       | 1       | 0       | 1       | 3         | 0         | 2         | 9         | 3         | 11        | Bacteria                                                                                                 |
| Otu753  | 28       | 14      | 10      | 14      | 17      | 10      | 14        | 6         | 7         | 13        | 12        | 9         | Bacteria; Proteobacteria; Gammaproteobacteria; Xanthomonadales; Xanthomonadaceae; Thermomonas            |
| Otu754  | 0        | 0       | 0       | 0       | 0       | 10      | 0         | 14        | 0         | 0         | 0         | 0         | Bacteria; Chloroflexi; Ktedonobacteria; Thermogemmatisporales; Thermogemmatisporaceae                    |

| #OTU ID | Z31DSO1r | Z31DSO2 | Z31DSO3 | Z31DSO4 | Z31DSO5 | Z31DSO6 | Z31JDSO1 | Z31JDSO2 | Z31JDSO3 | Z31JDSO4 | Z31JDSO5 | Z31JDSO6 | taxonomy                                                                              |
|---------|----------|---------|---------|---------|---------|---------|----------|----------|----------|----------|----------|----------|---------------------------------------------------------------------------------------|
| Otu755  | 7        | 6       | 1       | 10      | 2       | 0       | 1        | 3        | 1        | 0        | 0        | 2        | Bacteria; Proteobacteria; Alphaproteobacteria                                         |
| Otu756  | 6        | 2       | 3       | 9       | 5       | 4       | 3        | 3        | 4        | 5        | 13       | 3        | Bacteria; Proteobacteria; Gammaproteobacteria; Xanthomonadales                        |
| Otu209  | 46       | 2       | 31      | 60      | 12      | 109     | 31       | 80       | 56       | 49       | 23       | 23       | Bacteria; Planctomycetes; Phycisphaerae; WD2101                                       |
| Otu758  | 18       | 4       | 1       | 9       | 2       | 7       | 13       | 10       | 13       | 8        | 13       | 11       | Bacteria; Gemmatimonadetes; Gemmatimonadetes; Ellin5290                               |
| Otu759  | 4        | 1       | 1       | 17      | 0       | 1       | 3        | 7        | 6        | 0        | 3        | 0        | Bacteria; Planctomycetes; Phycisphaerae; WD2101                                       |
| Otu976  | 2        | 3       | 4       | 0       | 3       | 9       | 12       | 0        | 4        | 8        | 7        | 4        | Bacteria; Firmicutes; Bacilli; Bacillales; Paenibacillaceae; Paenibacillus            |
| Otu977  | 8        | 7       | 4       | 8       | 2       | 0       | 3        | 0        | 2        | 2        | 11       | 2        | Bacteria; Actinobacteria; Thermoleophilia; Gaiellales; Gaiellaceae                    |
| Otu970  | 16       | 1       | 3       | 8       | 3       | 3       | 2        | 1        | 2        | 1        | 8        | 1        | Bacteria; Planctomycetes; Planctomycetia; Gemmatales; Gemmataceae; Gemmata            |
| Otu971  | 8        | 4       | 9       | 12      | 8       | 4       | 13       | 8        | 10       | 10       | 7        | 3        | Bacteria                                                                              |
| Otu972  | 0        | 0       | 0       | 5       | 1       | 2       | 3        | 4        | 4        | 4        | 2        | 10       | Bacteria; Chloroflexi; Anaerolineae; SBR1031; oc28                                    |
| Otu201  | 13       | 20      | 54      | 46      | 33      | 44      | 52       | 40       | 35       | 27       | 74       | 13       | Bacteria; Cyanobacteria; Chloroplast; Chlorophyta                                     |
| Otu3062 | 5        | 1       | 0       | 3       | 1       | 0       | 1        | 0        | 0        | 1        | 0        | 0        | Bacteria; Chloroflexi; Anaerolineae; envOPS12                                         |
| Otu3063 | 1        | 0       | 0       | 0       | 0       | 0       | 0        | 1        | 1        | 0        | 0        | 2        | Bacteria; OD1; ZB2                                                                    |
| Otu3060 | 0        | 3       | 0       | 0       | 0       | 1       | 1        | 0        | 0        | 1        | 0        | 1        | Bacteria; Chloroflexi; Ktedonobacteria; Ktedonobacteriales; Ktedonobacteraceae        |
| Otu3061 | 1        | 0       | 1       | 2       | 0       | 0       | 1        | 0        | 0        | 2        | 5        | 2        | Bacteria; Proteobacteria; Deltaproteobacteria; MIZ46                                  |
| Otu3066 | 0        | 1       | 0       | 0       | 2       | 0       | 0        | 0        | 1        | 0        | 0        | 0        | Bacteria; Chloroflexi; Anaerolineae; CFB-26                                           |
| Otu3067 | 0        | 0       | 0       | 0       | 0       | 2       | 0        | 0        | 0        | 1        | 0        | 0        | Bacteria; Planctomycetes; Phycisphaerae; CPLa-3                                       |
| Otu3064 | 2        | 1       | 0       | 1       | 1       | 0       | 0        | 0        | 0        | 0        | 0        | 0        | Bacteria; Acidobacteria                                                               |
| Otu3065 | 2        | 0       | 0       | 0       | 0       | 0       | 0        | 0        | 0        | 0        | 0        | 0        | Bacteria; Proteobacteria; Deltaproteobacteria; MIZ46                                  |
| Otu3068 | 0        | 0       | 0       | 0       | 1       | 2       | 0        | 2        | 0        | 1        | 0        | 0        | Bacteria; Proteobacteria; Gammaproteobacteria; Legionellales; Coxiellaceae; Aquicella |
| Otu3069 | 0        | 0       | 0       | 1       | 1       | 1       | 0        | 0        | 0        | 2        | 1        | 0        | Bacteria; Actinobacteria; Acidimicrobiia; Acidimicrobiales                            |
| Otu682  | 2        | 3       | 0       | 9       | 0       | 3       | 3        | 3        | 8        | 12       | 5        | 5        | Bacteria; Chlorobi                                                                    |

| #OTU ID | Z31DSO1r | Z31DSO2 | Z31DSO3 | Z31DSO4 | Z31DSO5 | Z31DSO6 | Z31JDSO1 | Z31JDSO2 | Z31JDSO3 | Z31JDSO4 | Z31JDSO5 | Z31JDSO6 | taxonomy                                                                                         |
|---------|----------|---------|---------|---------|---------|---------|----------|----------|----------|----------|----------|----------|--------------------------------------------------------------------------------------------------|
| Otu683  | 7        | 10      | 5       | 18      | 4       | 11      | 18       | 11       | 7        | 11       | 16       | 10       | Bacteria; Proteobacteria; Deltaproteobacteria; Myxococcales; Haliangiaceae                       |
| Otu680  | 1        | 0       | 0       | 0       | 0       | 4       | 13       | 0        | 1        | 9        | 2        | 12       | Bacteria; Chloroflexi; Ktedonobacteria; Thermogemmatisporales; Thermogemmatisporaceae            |
| Otu681  | 9        | 6       | 6       | 14      | 5       | 5       | 6        | 3        | 3        | 5        | 6        | 2        | Bacteria; Chloroflexi; Anaerolineae; A31                                                         |
| Otu686  | 0        | 4       | 0       | 3       | 6       | 0       | 0        | 0        | 0        | 0        | 18       | 0        | Bacteria; OD1; ABY1                                                                              |
| Otu687  | 0        | 0       | 0       | 2       | 0       | 0       | 14       | 0        | 0        | 0        | 0        | 0        | Bacteria; Bacteroidetes; VC2_1_Bac22                                                             |
| Otu684  | 32       | 18      | 24      | 29      | 14      | 24      | 31       | 21       | 16       | 32       | 19       | 29       | Bacteria; Proteobacteria; Deltaproteobacteria; Myxococcales                                      |
| Otu685  | 6        | 4       | 5       | 20      | 7       | 4       | 3        | 8        | 11       | 6        | 9        | 5        | Bacteria; OD1; SM2F11                                                                            |
| Otu2793 | 2        | 0       | 0       | 0       | 0       | 0       | 0        | 0        | 0        | 0        | 0        | 0        | Bacteria; Proteobacteria; Alphaproteobacteria                                                    |
| Otu2792 | 0        | 0       | 5       | 0       | 1       | 0       | 0        | 0        | 0        | 0        | 1        | 0        | Bacteria; Chloroflexi; Anaerolineae; SBR1031; A4b                                                |
| Otu688  | 17       | 2       | 8       | 6       | 3       | 2       | 4        | 5        | 7        | 4        | 3        | 3        | Bacteria; Armatimonadetes; Armatimonadia; Armatimonadales; Armatimonadaceae                      |
| Otu689  | 8        | 6       | 5       | 14      | 6       | 28      | 3        | 1        | 12       | 10       | 17       | 0        | Bacteria; Proteobacteria; Deltaproteobacteria; Desulfuromonadales; Geobacteraceae; Geobacter     |
| Otu2797 | 2        | 0       | 0       | 0       | 0       | 0       | 0        | 0        | 0        | 0        | 0        | 0        | Bacteria; Gemmatimonadetes; Gemmatimonadetes                                                     |
| Otu2796 | 4        | 0       | 0       | 0       | 0       | 1       | 1        | 1        | 0        | 0        | 0        | 1        | Bacteria; Planctomycetes; Planctomycetia; Gemmatales; Isosphaeraceae                             |
| Otu2795 | 0        | 0       | 0       | 0       | 1       | 0       | 2        | 1        | 0        | 1        | 1        | 0        | Bacteria; Actinobacteria                                                                         |
| Otu2794 | 0        | 1       | 1       | 2       | 0       | 1       | 2        | 1        | 0        | 0        | 1        | 1        | Bacteria; Actinobacteria; Actinobacteria; Actinomycetales; Nocardia; Nocardia                    |
| Otu372  | 2        | 6       | 2       | 13      | 22      | 1       | 3        | 1        | 1        | 6        | 32       | 6        | Bacteria; Proteobacteria; Gammaproteobacteria                                                    |
| Otu373  | 42       | 31      | 64      | 78      | 11      | 26      | 101      | 69       | 56       | 35       | 41       | 65       | Bacteria; Bacteroidetes; Saprospirae; Saprospirales; Chitinophagaceae                            |
| Otu370  | 38       | 12      | 8       | 13      | 9       | 16      | 17       | 9        | 13       | 8        | 14       | 11       | Bacteria; Gemmatimonadetes; Gemmatimonadetes                                                     |
| Otu371  | 46       | 29      | 20      | 37      | 23      | 21      | 36       | 16       | 32       | 32       | 28       | 23       | Bacteria; Proteobacteria; Deltaproteobacteria; Myxococcales                                      |
| Otu376  | 114      | 86      | 62      | 105     | 32      | 31      | 83       | 102      | 116      | 93       | 78       | 57       | Bacteria; Bacteroidetes; Saprospirae; Saprospirales; Chitinophagaceae; Flavisolibacter           |
| Otu377  | 35       | 9       | 30      | 66      | 28      | 25      | 42       | 32       | 39       | 41       | 64       | 34       | Bacteria; Acidobacteria; Acidobacteria; Acidobacteriales; Koribacteraceae; Candidatus_Koribacter |
| Otu374  | 25       | 21      | 14      | 56      | 17      | 28      | 66       | 55       | 58       | 47       | 35       | 34       | Bacteria; Proteobacteria; Alphaproteobacteria; Caulobacteriales; Caulobacteraceae                |

| #OTU ID | Z31DSO1r | Z31DSO2 | Z31DSO3 | Z31DSO4 | Z31DSO5 | Z31DSO6 | Z31JDSO1 | Z31JDSO2 | Z31JDSO3 | Z31JDSO4 | Z31JDSO5 | Z31JDSO6 | taxonomy                                                                                                          |
|---------|----------|---------|---------|---------|---------|---------|----------|----------|----------|----------|----------|----------|-------------------------------------------------------------------------------------------------------------------|
| Otu375  | 46       | 38      | 6       | 13      | 18      | 1       | 12       | 4        | 4        | 9        | 12       | 3        | Bacteria; Acidobacteria; Chloracidobacteria; RB41                                                                 |
| Otu378  | 0        | 2       | 9       | 14      | 8       | 27      | 5        | 19       | 22       | 10       | 8        | 5        | Bacteria; Chloroflexi; Anaerolineae; SBR1031; oc28                                                                |
| Otu379  | 7        | 1       | 8       | 31      | 9       | 2       | 6        | 0        | 5        | 8        | 18       | 3        | Bacteria; Bacteroidetes; Sphingobacteriia; Sphingobacteriales                                                     |
| Otu2425 | 0        | 0       | 0       | 0       | 0       | 0       | 0        | 0        | 0        | 2        | 0        | 0        | Bacteria; Chlamydiae; Chlamydia; Chlamydiales; Parachlamydiaceae                                                  |
| Otu2424 | 0        | 0       | 0       | 0       | 0       | 0       | 2        | 3        | 1        | 1        | 2        | 0        | Bacteria; Proteobacteria; Alphaproteobacteria                                                                     |
| Otu2427 | 2        | 0       | 1       | 0       | 0       | 0       | 1        | 0        | 1        | 4        | 1        | 0        | Bacteria; Verrucomicrobia; Spartobacteria; Chthoniobacteriales; Chthoniobacteraceae; Candidatus_Xiphinematobacter |
| Otu2426 | 2        | 0       | 4       | 1       | 5       | 0       | 3        | 1        | 2        | 1        | 5        | 1        | Bacteria; Firmicutes; Bacilli; Bacillales; Paenibacillaceae; Paenibacillus                                        |
| Otu2421 | 3        | 3       | 0       | 0       | 1       | 0       | 0        | 0        | 0        | 0        | 3        | 0        | Bacteria; Acidobacteria; Solibacteres; Solibacteriales; Solibacteraceae; Candidatus_Solibacter                    |
| Otu2420 | 7        | 2       | 3       | 2       | 4       | 0       | 2        | 1        | 1        | 1        | 2        | 1        | Bacteria; Proteobacteria; Alphaproteobacteria; Rhodospirillales; Rhodospirillaceae                                |
| Otu2423 | 2        | 2       | 2       | 0       | 2       | 0       | 2        | 0        | 1        | 1        | 1        | 0        | Bacteria                                                                                                          |
| Otu2422 | 0        | 1       | 2       | 0       | 0       | 0       | 1        | 0        | 0        | 0        | 1        | 1        | Bacteria; Cyanobacteria; Chloroplast; Chlorophyta; Chlamydomonadaceae; Chlamydomonas; Chlamydomonas_applanata     |
| Otu2429 | 0        | 1       | 0       | 3       | 0       | 0       | 0        | 0        | 0        | 0        | 0        | 0        | Bacteria; Bacteroidetes; Cytophagia; Cytophagales; Cytophagaceae                                                  |
| Otu2428 | 0        | 0       | 0       | 0       | 0       | 0       | 0        | 0        | 2        | 0        | 0        | 0        | Bacteria; Proteobacteria; Gammaproteobacteria; Legionellales                                                      |
| Otu2056 | 3        | 0       | 0       | 0       | 0       | 0       | 0        | 0        | 0        | 0        | 0        | 0        | Bacteria; Planctomycetes; Planctomycetia; Gemmatales; Gemmataceae; Gemmata                                        |
| Otu703  | 18       | 3       | 5       | 5       | 1       | 6       | 4        | 3        | 0        | 4        | 5        | 1        | Bacteria; Bacteroidetes; Sphingobacteriia; Sphingobacteriales                                                     |
| Otu3148 | 0        | 0       | 2       | 0       | 3       | 0       | 0        | 0        | 0        | 0        | 1        | 0        | Bacteria; Tenericutes; Mollicutes; Anaeroplasmatales; Anaeroplasmataceae; Asteroleplasma                          |
| Otu702  | 21       | 11      | 2       | 13      | 14      | 4       | 2        | 3        | 8        | 13       | 25       | 4        | Bacteria; Verrucomicrobia; Pedosphaerae; Pedosphaerales                                                           |
| Otu701  | 4        | 3       | 22      | 6       | 4       | 12      | 15       | 1        | 7        | 2        | 8        | 5        | Bacteria; Actinobacteria; Actinobacteria; Actinomycetales; Pseudonocardia                                         |
| Otu700  | 17       | 4       | 4       | 10      | 2       | 11      | 27       | 18       | 15       | 15       | 9        | 14       | Bacteria; Proteobacteria; Alphaproteobacteria; Rhodospirillales; Rhodospirillaceae                                |
| Otu198  | 75       | 28      | 36      | 58      | 39      | 55      | 52       | 82       | 77       | 70       | 49       | 52       | Bacteria; Verrucomicrobia; Opitutae; Opitutales; Opitutaceae; Opitutus                                            |
| Otu199  | 36       | 38      | 71      | 109     | 30      | 42      | 61       | 71       | 93       | 67       | 53       | 58       | Bacteria; Verrucomicrobia; Pedosphaerae; Pedosphaerales                                                           |
| Otu196  | 22       | 8       | 43      | 33      | 32      | 97      | 9        | 3        | 13       | 24       | 30       | 6        | Bacteria; Chloroflexi; Anaerolineae; SBR1031; oc28                                                                |

| #OTU ID | Z31DSO1r | Z31DSO2 | Z31DSO3 | Z31DSO4 | Z31DSO5 | Z31DSO6 | Z31JDSO1 | Z31JDSO2 | Z31JDSO3 | Z31JDSO4 | Z31JDSO5 | Z31JDSO6 | taxonomy                                                                                      |
|---------|----------|---------|---------|---------|---------|---------|----------|----------|----------|----------|----------|----------|-----------------------------------------------------------------------------------------------|
| Otu707  | 2        | 5       | 13      | 10      | 11      | 10      | 5        | 8        | 10       | 2        | 14       | 3        | Bacteria; Chloroflexi; Anaerolineae; SBR1031; A4b                                             |
| Otu194  | 0        | 0       | 6       | 3       | 2       | 0       | 1        | 0        | 3        | 0        | 0        | 88       | Bacteria; Firmicutes; Bacilli; Bacillales; Paenibacillaceae; Paenibacillus                    |
| Otu195  | 140      | 43      | 38      | 54      | 39      | 21      | 37       | 18       | 22       | 24       | 72       | 8        | Bacteria; Proteobacteria; Betaproteobacteria; SC-I-84                                         |
| Otu192  | 70       | 31      | 19      | 34      | 27      | 4       | 7        | 2        | 10       | 17       | 39       | 7        | Bacteria; Verrucomicrobia; Pedosphaerae; Pedosphaerales                                       |
| Otu193  | 49       | 16      | 17      | 58      | 30      | 28      | 43       | 88       | 51       | 72       | 36       | 56       | Bacteria; Acidobacteria; Solibacteres; Solibacterales; Solibacteraceae; Candidatus_Solibacter |
| Otu190  | 89       | 39      | 23      | 16      | 26      | 3       | 36       | 6        | 6        | 30       | 28       | 1        | Bacteria; Proteobacteria; Betaproteobacteria; SC-I-84                                         |
| Otu191  | 58       | 53      | 29      | 34      | 45      | 4       | 32       | 4        | 14       | 34       | 47       | 11       | Bacteria; Acidobacteria; S035                                                                 |
| Otu705  | 11       | 4       | 4       | 19      | 5       | 13      | 14       | 6        | 13       | 13       | 16       | 19       | Bacteria; Gemmatimonadetes; Gemmatimonadetes; Ellin5290                                       |
| Otu704  | 12       | 5       | 9       | 22      | 9       | 13      | 20       | 17       | 18       | 6        | 4        | 4        | Bacteria; Actinobacteria; Acidimicrobia; Acidimicrobiales                                     |
| Otu3273 | 0        | 0       | 0       | 0       | 0       | 1       | 2        | 0        | 0        | 0        | 1        | 0        | Bacteria; Bacteroidetes; Cytophagia; Cytophagales; Amoebophilaceae; Candidatus_Amoebophilus   |
| Otu3272 | 0        | 1       | 1       | 2       | 2       | 0       | 1        | 0        | 1        | 1        | 0        | 0        | Bacteria; Bacteroidetes; Cytophagia; Cytophagales; Cytophagaceae; Sporocytophaga              |
| Otu3271 | 1        | 1       | 0       | 0       | 0       | 0       | 0        | 0        | 2        | 0        | 0        | 0        | Bacteria; Firmicutes; Clostridia; Clostridiales; Syntrophomonadaceae; Syntrophomonas          |
| Otu3270 | 0        | 2       | 0       | 1       | 0       | 1       | 0        | 0        | 2        | 0        | 2        | 0        | Bacteria; Chloroflexi; Anaerolineae; SBR1031; A4b                                             |
| Otu3277 | 0        | 3       | 0       | 1       | 1       | 1       | 2        | 1        | 0        | 1        | 1        | 1        | Bacteria; Proteobacteria; Gammaproteobacteria; Legionellales                                  |
| Otu3276 | 0        | 5       | 1       | 1       | 0       | 2       | 0        | 0        | 1        | 0        | 0        | 0        | Bacteria; Proteobacteria; Deltaproteobacteria; Myxococcales                                   |
| Otu1839 | 1        | 0       | 1       | 3       | 0       | 0       | 1        | 0        | 0        | 0        | 1        | 0        | Bacteria; Proteobacteria; Alphaproteobacteria                                                 |
| Otu1838 | 4        | 2       | 0       | 4       | 0       | 1       | 2        | 0        | 2        | 0        | 0        | 1        | Bacteria                                                                                      |
| Otu1837 | 0        | 2       | 5       | 3       | 0       | 2       | 6        | 2        | 5        | 2        | 2        | 1        | Bacteria; Proteobacteria; Alphaproteobacteria; Rhizobiales                                    |
| Otu1836 | 3        | 0       | 0       | 0       | 0       | 0       | 0        | 0        | 0        | 0        | 3        | 1        | Bacteria; Gemmatimonadetes; Gemmatimonadetes; Gemmatimonadales; Ellin5301                     |
| Otu1835 | 5        | 3       | 1       | 6       | 3       | 0       | 8        | 1        | 0        | 3        | 10       | 2        | Bacteria; Bacteroidetes; Saprospirae; Saprospirales; Chitinophagaceae                         |
| Otu1834 | 0        | 0       | 0       | 0       | 0       | 0       | 0        | 0        | 0        | 3        | 0        | 0        | Bacteria; Proteobacteria; Gammaproteobacteria; Legionellales                                  |
| Otu1833 | 0        | 1       | 0       | 1       | 0       | 1       | 0        | 2        | 0        | 1        | 3        | 0        | Bacteria; Proteobacteria; Gammaproteobacteria; Legionellales; Coxiellaceae                    |

| #OTU ID | Z31DSO1r | Z31DSO2 | Z31DSO3 | Z31DSO4 | Z31DSO5 | Z31DSO6 | Z31JDSO1 | Z31JDSO2 | Z31JDSO3 | Z31JDSO4 | Z31JDSO5 | Z31JDSO6 | taxonomy                                                                                                         |
|---------|----------|---------|---------|---------|---------|---------|----------|----------|----------|----------|----------|----------|------------------------------------------------------------------------------------------------------------------|
| Otu1832 | 3        | 1       | 1       | 0       | 1       | 2       | 5        | 4        | 3        | 2        | 3        | 2        | Bacteria; Actinobacteria; Acidimicrobiia; Acidimicrobiales                                                       |
| Otu1831 | 0        | 2       | 1       | 0       | 3       | 0       | 0        | 1        | 0        | 0        | 3        | 0        | Bacteria; Chloroflexi; Anaerolineae; SBR1031; A4b                                                                |
| Otu1830 | 5        | 1       | 3       | 2       | 2       | 0       | 3        | 0        | 0        | 0        | 0        | 0        | Bacteria; Proteobacteria; Deltaproteobacteria; Syntrophobacterales; Syntrophobacteraceae                         |
| Otu996  | 11       | 5       | 0       | 1       | 2       | 3       | 1        | 0        | 0        | 4        | 7        | 1        | Bacteria; Proteobacteria; Deltaproteobacteria; Myxococcales                                                      |
| Otu997  | 0        | 0       | 1       | 3       | 0       | 0       | 2        | 1        | 4        | 2        | 10       | 1        | Bacteria; Proteobacteria; Alphaproteobacteria                                                                    |
| Otu994  | 15       | 5       | 5       | 1       | 1       | 1       | 0        | 2        | 1        | 1        | 6        | 1        | Bacteria; Gemmatimonadetes; Gemmatimonadetes; Ellin5290                                                          |
| Otu995  | 0        | 7       | 6       | 4       | 0       | 3       | 2        | 1        | 2        | 1        | 0        | 1        | Bacteria                                                                                                         |
| Otu992  | 7        | 3       | 7       | 4       | 6       | 7       | 5        | 3        | 4        | 4        | 9        | 3        | Bacteria; Chloroflexi; Ktedonobacteria; JG30-KF-AS9                                                              |
| Otu993  | 13       | 15      | 6       | 2       | 2       | 1       | 13       | 2        | 5        | 5        | 6        | 1        | Bacteria; Proteobacteria; Betaproteobacteria; MND1                                                               |
| Otu990  | 10       | 2       | 8       | 8       | 3       | 4       | 6        | 1        | 5        | 5        | 11       | 8        | Bacteria; Gemmatimonadetes; Gemmatimonadetes                                                                     |
| Otu991  | 12       | 7       | 6       | 18      | 9       | 10      | 17       | 22       | 13       | 7        | 13       | 6        | Bacteria; Planctomycetes; Phycisphaerae; WD2101                                                                  |
| Otu2339 | 0        | 0       | 1       | 2       | 0       | 0       | 0        | 0        | 0        | 0        | 0        | 0        | Bacteria; Verrucomicrobia; Spartobacteria; Chthoniobacterales; Chthoniobacteraceae; Candidatus_Xiphinematobacter |
| Otu2338 | 2        | 1       | 0       | 3       | 0       | 0       | 0        | 1        | 2        | 0        | 1        | 0        | Bacteria; OD1; ZB2                                                                                               |
| Otu998  | 6        | 8       | 2       | 5       | 7       | 3       | 13       | 6        | 2        | 7        | 10       | 2        | Bacteria; Gemmatimonadetes; Gemm-1                                                                               |
| Otu999  | 0        | 5       | 1       | 11      | 1       | 3       | 2        | 4        | 5        | 9        | 4        | 4        | Bacteria; OP3; PBS-25                                                                                            |
| Otu1789 | 3        | 2       | 1       | 0       | 1       | 0       | 0        | 0        | 1        | 0        | 2        | 0        | Bacteria                                                                                                         |
| Otu1788 | 5        | 2       | 2       | 1       | 2       | 1       | 2        | 1        | 1        | 0        | 3        | 0        | Bacteria; Proteobacteria; Alphaproteobacteria; Rhizobiales; Hyphomicrobiaceae; Hyphomicrobium                    |
| Otu2254 | 2        | 0       | 0       | 0       | 0       | 0       | 0        | 0        | 0        | 0        | 0        | 0        | Bacteria; Proteobacteria; Alphaproteobacteria; Rhizobiales                                                       |
| Otu2255 | 0        | 0       | 0       | 2       | 0       | 1       | 0        | 0        | 1        | 0        | 0        | 0        | Bacteria; Proteobacteria                                                                                         |
| Otu2252 | 0        | 0       | 1       | 2       | 0       | 2       | 5        | 2        | 1        | 1        | 2        | 1        | Bacteria; Proteobacteria; Gammaproteobacteria; Legionellales; Coxiellaceae; Aquicella                            |
| Otu2253 | 0        | 0       | 0       | 0       | 0       | 0       | 0        | 2        | 0        | 0        | 1        | 0        | Bacteria; Cyanobacteria; Chloroplast                                                                             |
| Otu2250 | 4        | 0       | 0       | 0       | 0       | 1       | 0        | 0        | 0        | 0        | 0        | 0        | Bacteria; Planctomycetes; Planctomycetia; Planctomycetales; Planctomycetaceae; Planctomyces                      |

| #OTU ID | Z31DSO1r | Z31DSO2 | Z31DSO3 | Z31DSO4 | Z31DSO5 | Z31DSO6 | Z31JDSO1 | Z31JDSO2 | Z31JDSO3 | Z31JDSO4 | Z31JDSO5 | Z31JDSO6 | taxonomy                                                                                 |
|---------|----------|---------|---------|---------|---------|---------|----------|----------|----------|----------|----------|----------|------------------------------------------------------------------------------------------|
| Otu2251 | 2        | 0       | 0       | 0       | 1       | 0       | 0        | 0        | 0        | 0        | 0        | 0        | Bacteria; TM7; TM7-1                                                                     |
| Otu1781 | 12       | 4       | 1       | 6       | 4       | 5       | 10       | 9        | 2        | 3        | 3        | 4        | Bacteria; Actinobacteria; Acidimicrobiia; Acidimicrobiales                               |
| Otu1780 | 0        | 1       | 1       | 0       | 0       | 0       | 0        | 1        | 0        | 0        | 3        | 0        | Bacteria; Proteobacteria; Deltaproteobacteria                                            |
| Otu1783 | 1        | 0       | 1       | 0       | 0       | 0       | 0        | 0        | 0        | 0        | 3        | 0        | Bacteria; Chloroflexi; C0119                                                             |
| Otu1782 | 1        | 2       | 2       | 1       | 0       | 0       | 0        | 2        | 3        | 0        | 4        | 0        | Bacteria; Planctomycetes; Planctomycetia; Gemmatales; Gemmataceae                        |
| Otu1785 | 0        | 0       | 1       | 1       | 0       | 0       | 0        | 2        | 3        | 3        | 0        | 1        | Bacteria; TM6; SJA-4                                                                     |
| Otu1784 | 0        | 0       | 0       | 0       | 0       | 0       | 0        | 3        | 0        | 0        | 1        | 0        | Bacteria; Planctomycetes; Planctomycetia; Gemmatales; Gemmataceae                        |
| Otu1787 | 5        | 3       | 3       | 3       | 1       | 1       | 1        | 1        | 3        | 3        | 3        | 1        | Bacteria; Planctomycetes; Phycisphaerae; WD2101                                          |
| Otu1786 | 3        | 0       | 0       | 2       | 1       | 1       | 0        | 0        | 0        | 0        | 2        | 1        | Bacteria                                                                                 |
| Otu3309 | 2        | 0       | 0       | 0       | 0       | 0       | 0        | 0        | 0        | 0        | 0        | 0        | Bacteria; Proteobacteria; Deltaproteobacteria; Myxococcales                              |
| Otu3308 | 2        | 0       | 0       | 0       | 0       | 0       | 0        | 0        | 0        | 0        | 1        | 0        | Bacteria                                                                                 |
| Otu3307 | 3        | 0       | 0       | 0       | 0       | 0       | 0        | 0        | 0        | 0        | 1        | 0        | Bacteria; Tenericutes; Mollicutes; Anaeroplasmatales; Anaeroplasmataceae; Asteroleplasma |
| Otu3306 | 0        | 0       | 0       | 1       | 0       | 2       | 0        | 0        | 0        | 0        | 1        | 0        | Bacteria; Proteobacteria; Betaproteobacteria                                             |
| Otu3305 | 0        | 1       | 0       | 3       | 1       | 0       | 1        | 0        | 0        | 1        | 0        | 0        | Bacteria                                                                                 |
| Otu3304 | 2        | 0       | 0       | 0       | 0       | 0       | 0        | 0        | 0        | 0        | 0        | 0        | Bacteria; Proteobacteria; Alphaproteobacteria; Rhodospirillales; Acetobacteraceae        |
| Otu3303 | 0        | 0       | 0       | 0       | 1       | 1       | 1        | 0        | 0        | 3        | 1        | 1        | Bacteria                                                                                 |
| Otu3302 | 2        | 0       | 0       | 0       | 0       | 0       | 0        | 0        | 0        | 0        | 0        | 0        | Bacteria; Acidobacteria; Chloracidobacteria; 11-24                                       |
| Otu3301 | 6        | 1       | 3       | 9       | 1       | 4       | 9        | 6        | 10       | 1        | 5        | 0        | Bacteria; Actinobacteria; Thermoleophilia; Solirubrobacterales; Patulibacteraceae        |
| Otu2481 | 2        | 0       | 0       | 0       | 0       | 0       | 0        | 0        | 0        | 0        | 0        | 0        | Bacteria; Planctomycetes                                                                 |
| Otu3364 | 0        | 0       | 0       | 0       | 0       | 0       | 0        | 3        | 0        | 1        | 0        | 0        | Bacteria; Chlamydiae; Chlamydia; Chlamydiales                                            |
| Otu1657 | 1        | 4       | 0       | 3       | 0       | 2       | 0        | 1        | 2        | 5        | 0        | 1        | Bacteria; Proteobacteria                                                                 |
| Otu1656 | 3        | 1       | 2       | 6       | 0       | 0       | 2        | 0        | 0        | 1        | 1        | 2        | Bacteria; Verrucomicrobia; Spartobacteria; Chthoniobacterales; Chthoniobacteraceae       |



| #OTU ID | Z31DSO1r | Z31DSO2 | Z31DSO3 | Z31DSO4 | Z31DSO5 | Z31DSO6 | Z31JDSO1 | Z31JDSO2 | Z31JDSO3 | Z31JDSO4 | Z31JDSO5 | Z31JDSO6 | taxonomy                                                                                         |
|---------|----------|---------|---------|---------|---------|---------|----------|----------|----------|----------|----------|----------|--------------------------------------------------------------------------------------------------|
| Otu1655 | 7        | 0       | 1       | 0       | 1       | 0       | 1        | 1        | 0        | 1        | 1        | 0        | Bacteria; Actinobacteria; Actinobacteria; Actinomycetales; Micromonosporaceae; Pilimelia         |
| Otu1654 | 9        | 0       | 4       | 1       | 1       | 0       | 6        | 2        | 0        | 0        | 2        | 2        | Bacteria; Planctomycetes; Phycisphaerae; WD2101                                                  |
| Otu1653 | 12       | 4       | 1       | 0       | 0       | 1       | 1        | 0        | 3        | 1        | 3        | 0        | Bacteria; Chloroflexi; P2-11E                                                                    |
| Otu1652 | 15       | 1       | 3       | 18      | 2       | 16      | 9        | 16       | 4        | 25       | 4        | 16       | Bacteria; Armatimonadetes; Fimbriimonadia; Fimbriimonadales; Fimbriimonadaceae                   |
| Otu1651 | 0        | 0       | 0       | 5       | 0       | 0       | 0        | 0        | 0        | 0        | 2        | 0        | Bacteria; Cyanobacteria; Nostocophycideae; Nostocales; Nostocaceae                               |
| Otu1650 | 6        | 3       | 1       | 0       | 2       | 4       | 0        | 0        | 0        | 3        | 8        | 0        | Bacteria; Chloroflexi; Anaerolineae                                                              |
| Otu1659 | 2        | 2       | 6       | 4       | 2       | 3       | 0        | 0        | 2        | 2        | 2        | 0        | Bacteria; Proteobacteria; Deltaproteobacteria; Myxococcales                                      |
| Otu1658 | 3        | 2       | 1       | 3       | 1       | 1       | 5        | 3        | 2        | 3        | 8        | 0        | Bacteria; Chloroflexi; Anaerolineae; A31                                                         |
| Otu2021 | 0        | 0       | 1       | 0       | 0       | 0       | 0        | 0        | 1        | 0        | 4        | 0        | Bacteria; Chloroflexi; C0119                                                                     |
| Otu2020 | 3        | 0       | 1       | 0       | 0       | 1       | 2        | 0        | 1        | 3        | 2        | 1        | Bacteria; Firmicutes; Bacilli; Bacillales; Thermoactinomycetaceae; Planifilum                    |
| Otu3140 | 0        | 0       | 0       | 0       | 0       | 3       | 0        | 1        | 1        | 1        | 0        | 0        | Bacteria; Planctomycetes; Planctomycetia; Gemmatales; Gemmataceae                                |
| Otu2023 | 1        | 0       | 3       | 4       | 3       | 3       | 0        | 0        | 3        | 3        | 4        | 1        | Bacteria; Spirochaetes; Spirochaetes; Spirochaetales; Spirochaetaceae                            |
| Otu2022 | 0        | 4       | 0       | 0       | 0       | 0       | 0        | 0        | 0        | 0        | 2        | 0        | Bacteria; TM7; SC3                                                                               |
| Otu2025 | 1        | 1       | 0       | 2       | 1       | 0       | 2        | 4        | 2        | 2        | 0        | 2        | Bacteria; TM6; SJA-4; S1198                                                                      |
| Otu2024 | 3        | 3       | 0       | 1       | 1       | 1       | 1        | 0        | 0        | 1        | 3        | 1        | Bacteria; Bacteroidetes; Saprospirae; Saprospirales; Chitinophagaceae                            |
| Otu3105 | 2        | 1       | 0       | 0       | 0       | 0       | 0        | 0        | 0        | 0        | 1        | 0        | Bacteria; Chloroflexi; Anaerolineae; SJA-15                                                      |
| Otu1538 | 0        | 1       | 2       | 0       | 1       | 0       | 0        | 0        | 0        | 0        | 4        | 0        | Bacteria; Proteobacteria; Alphaproteobacteria; Sphingomonadales; Sphingomonadaceae; Sphingomonas |
| Otu1539 | 2        | 3       | 1       | 7       | 5       | 4       | 2        | 0        | 0        | 1        | 10       | 3        | Bacteria; Proteobacteria; Deltaproteobacteria; Myxococcales                                      |
| Otu2027 | 3        | 1       | 0       | 3       | 0       | 1       | 1        | 0        | 0        | 0        | 1        | 0        | Bacteria; Bacteroidetes                                                                          |
| Otu49   | 67       | 61      | 182     | 128     | 43      | 79      | 296      | 132      | 121      | 58       | 95       | 87       | Bacteria; Actinobacteria; Actinobacteria; Actinomycetales; Streptomycetaceae                     |
| Otu48   | 130      | 100     | 85      | 153     | 84      | 61      | 263      | 150      | 201      | 263      | 237      | 101      | Bacteria; Actinobacteria; Thermoleophilia; Gaiellales; Gaiellaceae                               |
| Otu47   | 113      | 150     | 137     | 137     | 149     | 71      | 105      | 51       | 66       | 160      | 202      | 89       | Bacteria; Proteobacteria; Deltaproteobacteria; Syntrophobacteriales; Syntrophobacteraceae        |

| #OTU ID | Z31DSO1r | Z31DSO2 | Z31DSO3 | Z31DSO4 | Z31DSO5 | Z31DSO6 | Z31JDSO1 | Z31JDSO2 | Z31JDSO3 | Z31JDSO4 | Z31JDSO5 | Z31JDSO6 | taxonomy                                                                                                            |
|---------|----------|---------|---------|---------|---------|---------|----------|----------|----------|----------|----------|----------|---------------------------------------------------------------------------------------------------------------------|
| Otu46   | 17       | 12      | 76      | 231     | 11      | 19      | 32       | 39       | 41       | 17       | 10       | 45       | Bacteria; Bacteroidetes; Saprospirae; Saprospirales; Chitinophagaceae; Chitinophaga                                 |
| Otu45   | 4        | 4       | 2       | 10      | 0       | 144     | 4        | 133      | 207      | 1        | 33       | 124      | Bacteria; Proteobacteria; Gammaproteobacteria; Enterobacteriales; Enterobacteriaceae; Escherichia; Escherichia_coli |
| Otu44   | 284      | 49      | 59      | 198     | 47      | 75      | 111      | 165      | 111      | 154      | 112      | 136      | Bacteria; Acidobacteria; iii1-8; DS-18                                                                              |
| Otu43   | 157      | 66      | 78      | 132     | 52      | 123     | 162      | 190      | 230      | 154      | 101      | 137      | Bacteria; Gemmatimonadetes; Gemmatimonadetes; Ellin5290                                                             |
| Otu42   | 78       | 136     | 244     | 226     | 94      | 213     | 452      | 171      | 228      | 271      | 397      | 166      | Bacteria; Firmicutes; Bacilli; Bacillales; Planococcaceae; Sporosarcina                                             |
| Otu41   | 29       | 13      | 47      | 17      | 40      | 18      | 236      | 8        | 4        | 16       | 16       | 14       | Bacteria; Proteobacteria; Alphaproteobacteria; Rhizobiales; Rhizobiaceae; Rhizobium                                 |
| Otu40   | 1032     | 402     | 305     | 720     | 230     | 386     | 725      | 650      | 822      | 539      | 477      | 564      | Bacteria; Proteobacteria; Betaproteobacteria; Ellin6067                                                             |
| Otu2924 | 0        | 0       | 0       | 0       | 0       | 0       | 2        | 1        | 0        | 0        | 0        | 0        | Bacteria; TM6; SJA-4                                                                                                |
| Otu2925 | 10       | 2       | 0       | 2       | 4       | 0       | 3        | 0        | 0        | 1        | 3        | 0        | Bacteria; Acidobacteria; Solibacteres; Solibacterales                                                               |
| Otu2926 | 1        | 0       | 1       | 0       | 1       | 3       | 4        | 1        | 0        | 0        | 1        | 2        | Bacteria; Actinobacteria; Actinobacteria; Actinomycetales                                                           |
| Otu2736 | 0        | 1       | 0       | 0       | 0       | 0       | 0        | 0        | 0        | 0        | 2        | 0        | Bacteria                                                                                                            |
| Otu2920 | 2        | 0       | 0       | 0       | 0       | 0       | 0        | 0        | 0        | 1        | 0        | 0        | Bacteria; Acidobacteria; Chloracidobacteria; 11-24                                                                  |
| Otu2921 | 2        | 0       | 0       | 0       | 0       | 0       | 0        | 0        | 0        | 0        | 0        | 0        | Bacteria; Gemmatimonadetes; Gemmatimonadetes; Gemmatimonadales; Ellin5301                                           |
| Otu2922 | 2        | 0       | 0       | 0       | 0       | 0       | 0        | 0        | 0        | 0        | 0        | 0        | Bacteria; OD1; SM2F11                                                                                               |
| Otu2923 | 2        | 1       | 0       | 0       | 0       | 0       | 0        | 1        | 0        | 0        | 0        | 0        | Bacteria; Chloroflexi; Anaerolineae; GCA004                                                                         |
| Otu3367 | 2        | 0       | 0       | 0       | 0       | 0       | 0        | 0        | 0        | 0        | 0        | 0        | Bacteria; WS2; SHA-109                                                                                              |
| Otu2928 | 1        | 0       | 0       | 0       | 0       | 2       | 0        | 0        | 2        | 0        | 1        | 0        | Bacteria; Proteobacteria; Alphaproteobacteria; Rickettsiales; mitochondria                                          |
| Otu2929 | 11       | 3       | 4       | 6       | 3       | 5       | 14       | 5        | 4        | 9        | 5        | 9        | Bacteria; Proteobacteria; Betaproteobacteria; SC-I-84                                                               |
| Otu1226 | 0        | 0       | 0       | 1       | 0       | 1       | 0        | 1        | 0        | 7        | 0        | 0        | Bacteria; TM6; SJA-4                                                                                                |
| Otu1227 | 11       | 9       | 4       | 6       | 3       | 5       | 6        | 7        | 9        | 5        | 8        | 1        | Bacteria; Armatimonadetes; 0319-6E2                                                                                 |
| Otu1224 | 0        | 0       | 1       | 6       | 0       | 0       | 0        | 0        | 0        | 0        | 0        | 0        | Bacteria; Bacteroidetes; Flavobacteriia; Flavobacteriales; Cryomorphaeae                                            |
| Otu1225 | 3        | 1       | 0       | 0       | 2       | 0       | 0        | 0        | 0        | 0        | 6        | 0        | Bacteria; Proteobacteria; Alphaproteobacteria; Rickettsiales; mitochondria                                          |

| #OTU ID | Z31DSO1r | Z31DSO2 | Z31DSO3 | Z31DSO4 | Z31DSO5 | Z31DSO6 | Z31JDSO1 | Z31JDSO2 | Z31JDSO3 | Z31JDSO4 | Z31JDSO5 | Z31JDSO6 | taxonomy                                                                                           |
|---------|----------|---------|---------|---------|---------|---------|----------|----------|----------|----------|----------|----------|----------------------------------------------------------------------------------------------------|
| Otu1222 | 6        | 0       | 0       | 0       | 0       | 1       | 0        | 0        | 1        | 0        | 1        | 0        | Bacteria; Proteobacteria; Alphaproteobacteria; Rhodospirillales; Rhodospirillaceae                 |
| Otu1223 | 10       | 2       | 1       | 4       | 3       | 2       | 5        | 0        | 1        | 6        | 8        | 1        | Bacteria; Acidobacteria; Solibacteres; Solibacterales                                              |
| Otu1220 | 7        | 2       | 3       | 6       | 0       | 10      | 1        | 4        | 2        | 5        | 0        | 5        | Bacteria; Planctomycetes; Planctomycetia; Gemmatales; Gemmataceae                                  |
| Otu1221 | 0        | 0       | 0       | 0       | 1       | 3       | 2        | 7        | 0        | 1        | 4        | 5        | Bacteria; Proteobacteria; Alphaproteobacteria; Rickettsiales; Rickettsiaceae; Rickettsia           |
| Otu1228 | 2        | 0       | 0       | 15      | 9       | 2       | 0        | 0        | 0        | 0        | 7        | 1        | Bacteria; Proteobacteria; Betaproteobacteria; Rhodocyclales; Rhodocyclaceae                        |
| Otu1229 | 0        | 1       | 2       | 1       | 1       | 10      | 11       | 6        | 6        | 7        | 9        | 4        | Bacteria; Actinobacteria; Actinobacteria; Actinomycetales                                          |
| Otu3145 | 0        | 0       | 0       | 2       | 0       | 1       | 2        | 1        | 3        | 0        | 0        | 0        | Bacteria; Proteobacteria                                                                           |
| Otu3144 | 1        | 2       | 0       | 1       | 0       | 0       | 0        | 0        | 0        | 1        | 2        | 0        | Bacteria; Proteobacteria; Alphaproteobacteria; Rhodospirillales; Rhodospirillaceae                 |
| Otu3479 | 2        | 0       | 0       | 0       | 0       | 0       | 0        | 0        | 0        | 0        | 0        | 0        | Bacteria; Proteobacteria; Alphaproteobacteria; Rickettsiales; mitochondria                         |
| Otu3478 | 1        | 0       | 4       | 0       | 0       | 0       | 0        | 1        | 3        | 0        | 0        | 1        | Bacteria; Elusimicrobia; Elusimicrobia; FAC88                                                      |
| Otu3471 | 0        | 0       | 4       | 1       | 1       | 0       | 0        | 0        | 0        | 0        | 0        | 0        | Bacteria; Proteobacteria; Deltaproteobacteria; Myxococcales                                        |
| Otu3470 | 3        | 1       | 2       | 1       | 1       | 1       | 0        | 1        | 0        | 1        | 1        | 1        | Bacteria; Planctomycetes; Phycisphaerae; WD2101                                                    |
| Otu3473 | 0        | 2       | 0       | 0       | 0       | 0       | 0        | 0        | 0        | 0        | 0        | 0        | Bacteria; Planctomycetes; Phycisphaerae; Phycisphaerales                                           |
| Otu3472 | 0        | 1       | 0       | 0       | 0       | 0       | 0        | 0        | 0        | 3        | 0        | 1        | Bacteria; Proteobacteria; Deltaproteobacteria; Bdellovibrionales; Bdellovibrionaceae; Bdellovibrio |
| Otu3475 | 0        | 1       | 0       | 0       | 0       | 0       | 2        | 0        | 0        | 0        | 1        | 0        | Bacteria; Proteobacteria; Gammaproteobacteria; Legionellales                                       |
| Otu3474 | 0        | 0       | 0       | 0       | 2       | 0       | 0        | 0        | 0        | 0        | 0        | 0        | Bacteria; Planctomycetes; Phycisphaerae; WD2101                                                    |
| Otu3477 | 0        | 0       | 0       | 0       | 0       | 1       | 0        | 0        | 0        | 2        | 0        | 0        | Bacteria; Chloroflexi; Ktedonobacteria; JG30-KF-AS9                                                |
| Otu3476 | 2        | 0       | 1       | 0       | 0       | 0       | 0        | 1        | 0        | 1        | 0        | 1        | Bacteria; Chloroflexi; Ktedonobacteria; TK10                                                       |
| Otu1312 | 0        | 0       | 0       | 1       | 0       | 12      | 0        | 6        | 7        | 0        | 0        | 1        | Bacteria; Proteobacteria; Betaproteobacteria                                                       |
| Otu1313 | 19       | 4       | 25      | 26      | 10      | 12      | 29       | 6        | 15       | 10       | 37       | 7        | Bacteria; Actinobacteria; Actinobacteria; Actinomycetales; Nocardioidaceae                         |
| Otu1310 | 2        | 4       | 8       | 1       | 3       | 7       | 11       | 3        | 2        | 5        | 16       | 3        | Bacteria; Firmicutes; Clostridia; Clostridiales; Clostridiaceae; Clostridium                       |
| Otu1311 | 1        | 0       | 0       | 4       | 1       | 0       | 5        | 4        | 1        | 5        | 1        | 0        | Bacteria; Chloroflexi; TK10; B07_WMSP1; FFC4570                                                    |

| #OTU ID | Z31DSO1r | Z31DSO2 | Z31DSO3 | Z31DSO4 | Z31DSO5 | Z31DSO6 | Z31JDSO1 | Z31JDSO2 | Z31JDSO3 | Z31JDSO4 | Z31JDSO5 | Z31JDSO6 | taxonomy                                                                               |
|---------|----------|---------|---------|---------|---------|---------|----------|----------|----------|----------|----------|----------|----------------------------------------------------------------------------------------|
| Otu1316 | 0        | 2       | 2       | 0       | 6       | 0       | 0        | 0        | 0        | 0        | 1        | 0        | Bacteria; Bacteroidetes; Saprospirae; Saprospirales; Chitinophagaceae                  |
| Otu1317 | 0        | 2       | 1       | 0       | 0       | 0       | 3        | 7        | 0        | 0        | 0        | 0        | Bacteria; Planctomycetes; Planctomycetia; Gemmatales; Gemmataceae; Gemmata             |
| Otu1314 | 0        | 0       | 0       | 0       | 0       | 0       | 7        | 0        | 0        | 0        | 0        | 0        | Bacteria; Proteobacteria; Alphaproteobacteria; Rhizobiales; Hyphomicrobiaceae; Devosia |
| Otu1315 | 3        | 4       | 6       | 10      | 1       | 7       | 14       | 3        | 2        | 4        | 9        | 3        | Bacteria; Actinobacteria; Thermoleophilia; Solirubrobacterales                         |
| Otu1318 | 4        | 1       | 1       | 2       | 0       | 1       | 8        | 4        | 3        | 7        | 1        | 2        | Bacteria; Planctomycetes; Phycisphaerae; WD2101                                        |
| Otu1319 | 1        | 0       | 6       | 2       | 1       | 2       | 3        | 0        | 3        | 2        | 2        | 1        | Bacteria; Proteobacteria; Alphaproteobacteria; Rhizobiales                             |
| Otu2659 | 15       | 15      | 2       | 5       | 5       | 12      | 3        | 7        | 10       | 24       | 3        | 21       | Bacteria; Bacteroidetes; Cytophagia; Cytophagales; Cytophagaceae                       |
| Otu2652 | 0        | 1       | 0       | 3       | 0       | 0       | 2        | 2        | 0        | 2        | 0        | 0        | Bacteria; Verrucomicrobia; Pedosphaerae; Pedosphaerales                                |
| Otu2653 | 2        | 1       | 0       | 0       | 2       | 0       | 0        | 0        | 0        | 0        | 1        | 0        | Bacteria; Acidobacteria; Chloracidobacteria; 11-24                                     |
| Otu2650 | 3        | 0       | 0       | 0       | 0       | 0       | 0        | 0        | 0        | 0        | 2        | 0        | Bacteria                                                                               |
| Otu2651 | 1        | 2       | 2       | 2       | 1       | 2       | 2        | 0        | 2        | 1        | 2        | 3        | Bacteria; Proteobacteria; Alphaproteobacteria; BD7-3                                   |
| Otu2656 | 0        | 0       | 0       | 0       | 0       | 0       | 0        | 0        | 0        | 2        | 0        | 0        | Bacteria; Cyanobacteria; 4C0d-2; MLE1-12                                               |
| Otu2657 | 1        | 1       | 1       | 0       | 0       | 0       | 0        | 0        | 0        | 1        | 2        | 0        | Bacteria; Chlamydiae; Chlamydia; Chlamydiales                                          |
| Otu2654 | 6        | 2       | 10      | 7       | 3       | 4       | 9        | 1        | 5        | 2        | 4        | 0        | Bacteria; Actinobacteria; Actinobacteria; Actinomycetales                              |
| Otu2655 | 0        | 0       | 0       | 0       | 0       | 2       | 0        | 0        | 0        | 2        | 0        | 0        | Bacteria; Proteobacteria; Deltaproteobacteria; Myxococcales                            |
| Otu567  | 18       | 2       | 5       | 5       | 2       | 2       | 0        | 2        | 1        | 0        | 1        | 0        | Bacteria; Bacteroidetes; Saprospirae; Saprospirales; Chitinophagaceae                  |
| Otu566  | 31       | 13      | 11      | 15      | 18      | 2       | 12       | 8        | 12       | 12       | 19       | 6        | Bacteria; Chloroflexi; Anaerolineae; SHA-20                                            |
| Otu565  | 7        | 18      | 3       | 8       | 23      | 3       | 5        | 4        | 4        | 0        | 18       | 1        | Bacteria; Chloroflexi; Anaerolineae; GCA004                                            |
| Otu564  | 17       | 6       | 7       | 12      | 1       | 17      | 9        | 3        | 8        | 5        | 2        | 8        | Bacteria; Planctomycetes; OMI190; CL500-15                                             |
| Otu563  | 16       | 8       | 9       | 5       | 10      | 7       | 3        | 0        | 1        | 6        | 13       | 3        | Bacteria; WS3; PRR-12; Sediment-1                                                      |
| Otu562  | 25       | 1       | 4       | 2       | 2       | 1       | 0        | 0        | 0        | 0        | 3        | 0        | Bacteria; Actinobacteria; Thermoleophilia                                              |
| Otu561  | 21       | 4       | 5       | 3       | 1       | 3       | 3        | 2        | 0        | 3        | 2        | 1        | Bacteria; Gemmatimonadetes; Gemmatimonadetes                                           |

| #OTU ID | Z31DSO1r | Z31DSO2 | Z31DSO3 | Z31DSO4 | Z31DSO5 | Z31DSO6 | Z31J1DSO1 | Z31J1DSO2 | Z31J1DSO3 | Z31J1DSO4 | Z31J1DSO5 | Z31J1DSO6 | taxonomy                                                                                                     |
|---------|----------|---------|---------|---------|---------|---------|-----------|-----------|-----------|-----------|-----------|-----------|--------------------------------------------------------------------------------------------------------------|
| Otu560  | 3        | 1       | 8       | 24      | 10      | 0       | 7         | 1         | 1         | 0         | 6         | 0         | Bacteria; Planctomycetes; Phycisphaerae; WD2101                                                              |
| Otu569  | 20       | 10      | 12      | 16      | 13      | 27      | 7         | 3         | 3         | 14        | 8         | 10        | Bacteria; Proteobacteria; Deltaproteobacteria; Myxococcales                                                  |
| Otu568  | 14       | 16      | 23      | 12      | 12      | 10      | 22        | 11        | 16        | 8         | 32        | 13        | Bacteria; Actinobacteria; Actinobacteria; Actinomycetales; Micromonosporaceae                                |
| Otu3480 | 4        | 5       | 6       | 7       | 0       | 3       | 12        | 12        | 4         | 5         | 3         | 11        | Bacteria; Acidobacteria; Acidobacteriia; Acidobacteriales; Acidobacteriaceae                                 |
| Otu1008 | 0        | 0       | 1       | 1       | 0       | 9       | 0         | 3         | 7         | 0         | 0         | 0         | Bacteria; Proteobacteria; Gammaproteobacteria; Legionellales; Coxiellaceae; Aquicella                        |
| Otu1009 | 2        | 2       | 0       | 11      | 3       | 2       | 0         | 1         | 7         | 1         | 3         | 6         | Bacteria; Proteobacteria; Deltaproteobacteria; Myxococcales                                                  |
| Otu1006 | 3        | 0       | 0       | 7       | 0       | 0       | 7         | 0         | 0         | 0         | 0         | 2         | Bacteria; Proteobacteria; Gammaproteobacteria; Legionellales                                                 |
| Otu1007 | 7        | 18      | 12      | 1       | 6       | 1       | 15        | 1         | 2         | 4         | 12        | 0         | Bacteria; Bacteroidetes; Saprospirae; Saprospirales; Chitinophagaceae                                        |
| Otu1004 | 14       | 1       | 0       | 2       | 3       | 2       | 6         | 5         | 1         | 2         | 4         | 4         | Bacteria; Proteobacteria; Alphaproteobacteria; Rhodospirillales; Rhodospirillaceae                           |
| Otu1005 | 7        | 6       | 1       | 1       | 8       | 2       | 2         | 1         | 3         | 0         | 5         | 1         | Bacteria; Proteobacteria; Gammaproteobacteria; Legionellales; Coxiellaceae; Aquicella                        |
| Otu1002 | 16       | 2       | 11      | 8       | 3       | 6       | 14        | 7         | 9         | 4         | 9         | 2         | Bacteria; Acidobacteria; Acidobacteriia; Acidobacteriales; Acidobacteriaceae                                 |
| Otu1003 | 8        | 1       | 2       | 2       | 2       | 1       | 4         | 1         | 1         | 2         | 2         | 3         | Bacteria; Verrucomicrobia; Spartobacteria; Chthoniobacteriales; Chthoniobacteraceae; Ellin506                |
| Otu1000 | 11       | 7       | 1       | 6       | 11      | 1       | 3         | 1         | 0         | 3         | 2         | 0         | Bacteria; Acidobacteria; Chloracidobacteria; RB41; Ellin6075                                                 |
| Otu1001 | 0        | 0       | 0       | 0       | 0       | 0       | 0         | 0         | 8         | 0         | 0         | 1         | Bacteria; Chlamydiae; Chlamydia; Chlamydiales                                                                |
| Otu969  | 0        | 6       | 6       | 8       | 3       | 7       | 4         | 6         | 9         | 2         | 7         | 8         | Bacteria; Proteobacteria; Gammaproteobacteria; Alteromonadales; Shewanellaceae; Shewanella; Shewanella_algae |
| Otu968  | 3        | 2       | 4       | 10      | 4       | 6       | 4         | 5         | 3         | 1         | 5         | 2         | Bacteria; Elusimicrobia; Elusimicrobia; FAC88                                                                |
| Otu219  | 1        | 0       | 1       | 2       | 0       | 0       | 2         | 0         | 0         | 58        | 0         | 2         | Bacteria; Bacteroidetes; Saprospirae; Saprospirales; Chitinophagaceae                                        |
| Otu218  | 50       | 17      | 19      | 64      | 23      | 16      | 49        | 11        | 26        | 26        | 41        | 21        | Bacteria; Proteobacteria; Betaproteobacteria; SC-I-84                                                        |
| Otu749  | 15       | 3       | 8       | 15      | 5       | 10      | 6         | 5         | 13        | 4         | 16        | 5         | Bacteria; Planctomycetes; Phycisphaerae; WD2101                                                              |
| Otu748  | 5        | 12      | 20      | 4       | 3       | 0       | 0         | 0         | 0         | 1         | 2         | 0         | Bacteria; Bacteroidetes; Saprospirae; Saprospirales; Chitinophagaceae                                        |
| Otu747  | 18       | 5       | 1       | 13      | 1       | 0       | 3         | 1         | 1         | 0         | 0         | 3         | Bacteria; Gemmatimonadetes; Gemmatimonadetes                                                                 |
| Otu962  | 1        | 0       | 12      | 10      | 3       | 3       | 2         | 0         | 7         | 11        | 3         | 2         | Bacteria; Proteobacteria; Gammaproteobacteria; Legionellales; Coxiellaceae; Aquicella                        |

| #OTU ID | Z31DSO1r | Z31DSO2 | Z31DSO3 | Z31DSO4 | Z31DSO5 | Z31DSO6 | Z31JDSO1 | Z31JDSO2 | Z31JDSO3 | Z31JDSO4 | Z31JDSO5 | Z31JDSO6 | taxonomy                                                                                       |
|---------|----------|---------|---------|---------|---------|---------|----------|----------|----------|----------|----------|----------|------------------------------------------------------------------------------------------------|
| Otu745  | 32       | 27      | 11      | 20      | 15      | 22      | 50       | 9        | 16       | 12       | 12       | 4        | Bacteria; Actinobacteria; Actinobacteria; Actinomycetales; Pseudonocardiaceae; Amycolatopsis   |
| Otu744  | 13       | 4       | 4       | 10      | 6       | 11      | 23       | 6        | 11       | 5        | 18       | 12       | Bacteria; Actinobacteria; Thermoleophila; Gaiellales                                           |
| Otu967  | 14       | 10      | 7       | 18      | 0       | 5       | 11       | 3        | 5        | 8        | 14       | 2        | Bacteria; Verrucomicrobia; Spartobacteria; Chthoniobacteriales; Chthoniobacteraceae            |
| Otu966  | 11       | 8       | 4       | 1       | 4       | 0       | 4        | 3        | 1        | 3        | 7        | 0        | Bacteria; Proteobacteria; Betaproteobacteria; A21b; UD5                                        |
| Otu965  | 9        | 4       | 0       | 2       | 2       | 0       | 8        | 2        | 0        | 2        | 2        | 1        | Bacteria; Actinobacteria; Acidimicrobia; Acidimicrobiales; EB1017                              |
| Otu964  | 0        | 1       | 0       | 1       | 1       | 1       | 0        | 7        | 2        | 0        | 0        | 1        | Bacteria; Proteobacteria                                                                       |
| Otu1532 | 1        | 0       | 4       | 9       | 2       | 1       | 0        | 0        | 0        | 1        | 0        | 0        | Bacteria; Bacteroidetes; Cytophagia; Cytophagales; Cytophagaceae                               |
| Otu3486 | 0        | 0       | 0       | 0       | 0       | 1       | 0        | 0        | 2        | 1        | 0        | 0        | Bacteria; Planctomycetes; Planctomycetia; Gemmatales; Gemmataceae                              |
| Otu3099 | 0        | 2       | 0       | 0       | 0       | 2       | 0        | 0        | 1        | 2        | 1        | 2        | Bacteria; Chloroflexi; Ktedonobacteria; Ktedonobacteriales; Ktedonobacteraceae                 |
| Otu1533 | 4        | 1       | 15      | 10      | 1       | 11      | 11       | 10       | 2        | 14       | 7        | 6        | Bacteria; Verrucomicrobia; Opitutae; Opitutales; Opitutaceae; Opitutus                         |
| Otu3097 | 2        | 0       | 1       | 0       | 1       | 1       | 1        | 1        | 0        | 0        | 1        | 0        | Bacteria; Chloroflexi; Anaerolineae; Caldilineales; Caldilineaceae                             |
| Otu3096 | 0        | 0       | 0       | 0       | 0       | 0       | 4        | 0        | 0        | 0        | 2        | 0        | Bacteria; Proteobacteria                                                                       |
| Otu3095 | 2        | 0       | 0       | 0       | 0       | 0       | 0        | 0        | 0        | 0        | 0        | 0        | Bacteria; Proteobacteria; Gammaproteobacteria                                                  |
| Otu1180 | 1        | 2       | 2       | 7       | 5       | 6       | 0        | 0        | 7        | 1        | 1        | 0        | Bacteria; Proteobacteria; Betaproteobacteria; Rhodocyclales; Rhodocyclaceae; Zoogloea          |
| Otu2055 | 0        | 2       | 0       | 0       | 2       | 4       | 0        | 0        | 1        | 6        | 7        | 4        | Bacteria; Cyanobacteria; Synechococcophycidae; Pseudanabaenales                                |
| Otu1530 | 0        | 0       | 2       | 3       | 0       | 0       | 4        | 1        | 4        | 1        | 0        | 1        | Bacteria; Proteobacteria; Alphaproteobacteria; Rhodospirillales; Rhodospirillaceae             |
| Otu3091 | 2        | 0       | 1       | 3       | 0       | 0       | 2        | 0        | 0        | 0        | 0        | 0        | Bacteria; Verrucomicrobia; Methylacidiphilae; Methylacidiphilales                              |
| Otu3090 | 4        | 0       | 1       | 0       | 0       | 1       | 1        | 0        | 0        | 0        | 0        | 0        | Bacteria; Chlamydiae; Chlamydia; Chlamydiales; Rhabdochlamydiaceae; Candidatus_Rhabdochlamydia |
| Otu691  | 3        | 0       | 0       | 0       | 1       | 0       | 2        | 1        | 1        | 12       | 0        | 15       | Bacteria; Chlamydiae; Chlamydia; Chlamydiales                                                  |
| Otu690  | 24       | 18      | 14      | 13      | 7       | 22      | 19       | 13       | 21       | 17       | 7        | 14       | Bacteria; Bacteroidetes; Cytophagia; Cytophagales; Cytophagaceae                               |
| Otu693  | 2        | 5       | 7       | 14      | 9       | 2       | 4        | 4        | 9        | 10       | 28       | 3        | Bacteria; Proteobacteria; Gammaproteobacteria; Legionellales; Coxiellaceae                     |
| Otu692  | 2        | 0       | 1       | 3       | 0       | 0       | 0        | 2        | 1        | 13       | 1        | 6        | Bacteria; Proteobacteria; Gammaproteobacteria                                                  |

| #OTU ID | Z31DSO1r | Z31DSO2 | Z31DSO3 | Z31DSO4 | Z31DSO5 | Z31DSO6 | Z31JDSO1 | Z31JDSO2 | Z31JDSO3 | Z31JDSO4 | Z31JDSO5 | Z31JDSO6 | taxonomy                                                                                            |
|---------|----------|---------|---------|---------|---------|---------|----------|----------|----------|----------|----------|----------|-----------------------------------------------------------------------------------------------------|
| Otu695  | 1        | 3       | 12      | 12      | 2       | 7       | 10       | 7        | 8        | 6        | 26       | 2        | Bacteria; Firmicutes; Clostridia; Clostridiales; Clostridiaceae; Clostridium; Clostridium_butyricum |
| Otu694  | 13       | 2       | 8       | 4       | 1       | 11      | 12       | 12       | 10       | 11       | 8        | 5        | Bacteria; Proteobacteria; Alphaproteobacteria; Rhodospirillales; Rhodospirillaceae                  |
| Otu697  | 15       | 8       | 6       | 13      | 8       | 10      | 8        | 9        | 12       | 14       | 9        | 9        | Bacteria; Acidobacteria                                                                             |
| Otu696  | 13       | 6       | 6       | 2       | 8       | 0       | 5        | 0        | 4        | 2        | 14       | 1        | Bacteria; Chloroflexi; C0119                                                                        |
| Otu699  | 17       | 3       | 2       | 0       | 1       | 2       | 0        | 1        | 4        | 16       | 5        | 18       | Bacteria; Bacteroidetes; Cytophagia; Cytophagales                                                   |
| Otu698  | 2        | 4       | 3       | 36      | 6       | 6       | 24       | 22       | 9        | 9        | 46       | 3        | Bacteria; Proteobacteria; Gammaproteobacteria; Legionellales; Coxiellaceae                          |
| Otu2782 | 2        | 0       | 0       | 1       | 0       | 0       | 0        | 0        | 0        | 0        | 0        | 0        | Bacteria; Proteobacteria; Alphaproteobacteria                                                       |
| Otu2783 | 8        | 2       | 3       | 0       | 0       | 0       | 1        | 1        | 0        | 0        | 1        | 0        | Bacteria; Proteobacteria; Alphaproteobacteria; Rhizobiales                                          |
| Otu2784 | 1        | 1       | 1       | 1       | 2       | 2       | 1        | 1        | 0        | 4        | 3        | 2        | Bacteria; Firmicutes; Clostridia; Clostridiales; Lachnospiraceae                                    |
| Otu2785 | 2        | 0       | 0       | 0       | 0       | 0       | 0        | 0        | 0        | 0        | 0        | 0        | Bacteria; Proteobacteria; Deltaproteobacteria; Myxococcales                                         |
| Otu2786 | 2        | 3       | 0       | 3       | 3       | 3       | 0        | 0        | 1        | 0        | 0        | 0        | Bacteria; Proteobacteria; Gammaproteobacteria; Alteromonadales; 211ds20                             |
| Otu1537 | 1        | 2       | 0       | 3       | 2       | 2       | 2        | 3        | 5        | 7        | 15       | 5        | Bacteria; Proteobacteria; Alphaproteobacteria; Rhizobiales; Methylobacteriaceae                     |
| Otu361  | 0        | 6       | 0       | 0       | 0       | 5       | 0        | 2        | 2        | 28       | 0        | 3        | Bacteria; Proteobacteria; Gammaproteobacteria; Legionellales; Coxiellaceae; Aquicella               |
| Otu360  | 31       | 5       | 9       | 27      | 4       | 31      | 19       | 24       | 20       | 5        | 14       | 19       | Bacteria; Proteobacteria; Deltaproteobacteria; Myxococcales                                         |
| Otu363  | 51       | 4       | 30      | 56      | 15      | 36      | 38       | 14       | 30       | 44       | 35       | 11       | Bacteria; Planctomycetes; Phycisphaerae; WD2101                                                     |
| Otu362  | 15       | 14      | 26      | 13      | 11      | 6       | 36       | 12       | 9        | 17       | 10       | 25       | Bacteria; Proteobacteria; Betaproteobacteria                                                        |
| Otu365  | 102      | 61      | 26      | 27      | 38      | 7       | 23       | 5        | 9        | 48       | 41       | 21       | Bacteria; Acidobacteria; Chloracidobacteria; RB41                                                   |
| Otu364  | 47       | 32      | 25      | 86      | 15      | 16      | 48       | 47       | 35       | 42       | 54       | 48       | Bacteria; Bacteroidetes; Saprospirae; Saprospirales; Chitinophagaceae                               |
| Otu367  | 51       | 14      | 17      | 32      | 18      | 10      | 47       | 15       | 21       | 39       | 25       | 13       | Bacteria; Gemmatimonadetes; Gemm-3                                                                  |
| Otu366  | 69       | 18      | 18      | 13      | 22      | 6       | 7        | 6        | 11       | 49       | 25       | 13       | Bacteria; Verrucomicrobia; Opitutae; Opitutales; Opitutaceae                                        |
| Otu369  | 49       | 21      | 33      | 35      | 21      | 25      | 59       | 47       | 31       | 67       | 48       | 38       | Bacteria; Nitrospirae; Nitrospira; Nitrospirales; Nitrospiraceae                                    |
| Otu368  | 37       | 10      | 8       | 44      | 10      | 11      | 22       | 18       | 24       | 18       | 21       | 11       | Bacteria; Proteobacteria; Betaproteobacteria; A21b; UD5                                             |

| #OTU ID | Z31DSO1r | Z31DSO2 | Z31DSO3 | Z31DSO4 | Z31DSO5 | Z31DSO6 | Z31JDSO1 | Z31JDSO2 | Z31JDSO3 | Z31JDSO4 | Z31JDSO5 | Z31JDSO6 | taxonomy                                                                                         |
|---------|----------|---------|---------|---------|---------|---------|----------|----------|----------|----------|----------|----------|--------------------------------------------------------------------------------------------------|
| Otu1535 | 3        | 6       | 5       | 1       | 3       | 12      | 1        | 6        | 4        | 6        | 3        | 5        | Bacteria; Acidobacteria; Acidobacteriia; Acidobacteriales; Koribacteraceae                       |
| Otu1344 | 0        | 0       | 3       | 1       | 0       | 3       | 4        | 1        | 2        | 2        | 0        | 8        | Bacteria; Gemmatimonadetes; Gemmatimonadetes; Ellin5290                                          |
| Otu2432 | 0        | 0       | 0       | 0       | 0       | 0       | 2        | 0        | 0        | 0        | 0        | 1        | Bacteria; Proteobacteria; Gammaproteobacteria; Legionellales; Coxiellaceae; Aquicella            |
| Otu2433 | 0        | 0       | 1       | 0       | 0       | 0       | 3        | 0        | 0        | 0        | 0        | 0        | Bacteria; Chloroflexi                                                                            |
| Otu2430 | 0        | 4       | 0       | 3       | 0       | 4       | 0        | 0        | 1        | 3        | 1        | 1        | Bacteria                                                                                         |
| Otu2431 | 3        | 0       | 0       | 2       | 0       | 0       | 0        | 0        | 0        | 0        | 0        | 1        | Bacteria; Planctomycetes; Planctomycetia; Gemmatales; Gemmataceae; Gemmata                       |
| Otu2436 | 3        | 0       | 0       | 0       | 0       | 0       | 0        | 0        | 0        | 0        | 0        | 0        | Bacteria; Gemmatimonadetes; Gemmatimonadetes; Gemmatimonadales; A1-B1                            |
| Otu2437 | 17       | 7       | 18      | 7       | 0       | 11      | 11       | 2        | 9        | 3        | 9        | 3        | Bacteria; Bacteroidetes; Saprospirae; Saprospirales; Chitinophagaceae                            |
| Otu2434 | 1        | 0       | 0       | 1       | 1       | 3       | 1        | 2        | 1        | 1        | 2        | 0        | Bacteria; Proteobacteria; Gammaproteobacteria; Legionellales; Coxiellaceae                       |
| Otu2435 | 0        | 0       | 1       | 1       | 0       | 2       | 1        | 1        | 2        | 0        | 2        | 0        | Bacteria; Firmicutes; Clostridia; OPB54                                                          |
| Otu2438 | 1        | 3       | 1       | 0       | 0       | 1       | 0        | 0        | 0        | 0        | 1        | 0        | Bacteria; Acidobacteria; Acidobacteria-6; CCU21                                                  |
| Otu2439 | 2        | 3       | 0       | 1       | 4       | 1       | 1        | 1        | 1        | 0        | 1        | 0        | Bacteria; Planctomycetes; Planctomycetia; Planctomycetales; Planctomycetaceae; Planctomyces      |
| Otu3351 | 2        | 2       | 2       | 5       | 0       | 1       | 0        | 0        | 0        | 0        | 3        | 1        | Bacteria; Planctomycetes; OM190; agg27                                                           |
| Otu189  | 137      | 70      | 71      | 40      | 44      | 13      | 9        | 1        | 5        | 54       | 65       | 10       | Bacteria; Verrucomicrobia; Pedosphaerae; Pedosphaerales                                          |
| Otu188  | 9        | 2       | 9       | 2       | 3       | 5       | 35       | 2        | 3        | 85       | 6        | 18       | Bacteria; Bacteroidetes; Sphingobacteriia; Sphingobacteriales; Sphingobacteriaceae; Pedobacter   |
| Otu185  | 122      | 18      | 19      | 14      | 5       | 8       | 26       | 9        | 6        | 10       | 4        | 9        | Bacteria; Proteobacteria; Alphaproteobacteria; Ellin329                                          |
| Otu184  | 112      | 29      | 33      | 44      | 32      | 33      | 51       | 21       | 31       | 26       | 52       | 12       | Bacteria; Proteobacteria; Betaproteobacteria                                                     |
| Otu187  | 33       | 15      | 29      | 54      | 17      | 26      | 86       | 56       | 69       | 50       | 53       | 31       | Bacteria; Proteobacteria; Alphaproteobacteria; Rhizobiales; Hyphomicrobiaceae; Rhodoplanes       |
| Otu186  | 127      | 75      | 56      | 55      | 85      | 32      | 39       | 35       | 31       | 34       | 112      | 16       | Bacteria; Acidobacteria; Chloracidobacteria; 11-24                                               |
| Otu181  | 69       | 35      | 27      | 12      | 32      | 8       | 11       | 5        | 12       | 18       | 47       | 12       | Bacteria; Acidobacteria; iii1-8; 32-20                                                           |
| Otu180  | 96       | 38      | 42      | 64      | 29      | 28      | 87       | 32       | 49       | 80       | 60       | 25       | Bacteria; Proteobacteria; Alphaproteobacteria; Sphingomonadales; Sphingomonadaceae; Kaistobacter |
| Otu183  | 49       | 9       | 36      | 59      | 25      | 27      | 48       | 44       | 35       | 59       | 61       | 68       | Bacteria; Armatimonadetes; Fimbriimonadia; Fimbriimonadales; Fimbriimonadaceae; Fimbriimonas     |



| #OTU ID | Z31DSO1r | Z31DSO2 | Z31DSO3 | Z31DSO4 | Z31DSO5 | Z31DSO6 | Z31JDSO1 | Z31JDSO2 | Z31JDSO3 | Z31JDSO4 | Z31JDSO5 | Z31JDSO6 | taxonomy                                                                                |
|---------|----------|---------|---------|---------|---------|---------|----------|----------|----------|----------|----------|----------|-----------------------------------------------------------------------------------------|
| Otu182  | 86       | 40      | 17      | 27      | 21      | 5       | 19       | 12       | 16       | 29       | 50       | 11       | Bacteria; Gemmatimonadetes; Gemmatimonadetes; Ellin5290                                 |
| Otu3260 | 2        | 1       | 1       | 0       | 0       | 0       | 0        | 2        | 0        | 0        | 1        | 0        | Bacteria; Planctomycetes; Planctomycetia; Gemmatales; Gemmataceae; Gemmata              |
| Otu3261 | 1        | 0       | 1       | 1       | 0       | 0       | 0        | 1        | 0        | 1        | 4        | 0        | Bacteria; Actinobacteria; Thermoleophilia; Gaiellales                                   |
| Otu3262 | 0        | 2       | 0       | 1       | 0       | 1       | 1        | 1        | 1        | 1        | 1        | 0        | Bacteria; Bacteroidetes                                                                 |
| Otu3263 | 46       | 15      | 7       | 6       | 13      | 2       | 6        | 2        | 2        | 6        | 20       | 4        | Bacteria; Proteobacteria; Alphaproteobacteria; Sphingomonadales; Sphingomonadaceae      |
| Otu1828 | 2        | 0       | 0       | 0       | 0       | 0       | 0        | 0        | 0        | 0        | 2        | 3        | Bacteria; Proteobacteria; Gammaproteobacteria; Legionellales; Coxiellaceae              |
| Otu1829 | 3        | 4       | 2       | 3       | 1       | 0       | 2        | 0        | 2        | 1        | 5        | 0        | Bacteria; Proteobacteria; Deltaproteobacteria; Myxococcales; Polyangiaceae              |
| Otu3266 | 1        | 2       | 0       | 0       | 0       | 0       | 0        | 0        | 0        | 2        | 1        | 0        | Bacteria                                                                                |
| Otu3267 | 0        | 0       | 0       | 0       | 0       | 2       | 0        | 0        | 0        | 0        | 0        | 0        | Bacteria; Chloroflexi; Ktedonobacteria; Thermogemmatissporales; Thermogemmatissporaceae |
| Otu1824 | 0        | 0       | 1       | 3       | 0       | 0       | 3        | 1        | 1        | 0        | 1        | 0        | Bacteria; Chloroflexi; Chloroflexi; AKIW781                                             |
| Otu1825 | 3        | 0       | 0       | 0       | 0       | 0       | 0        | 0        | 0        | 0        | 0        | 0        | Bacteria; Proteobacteria; Betaproteobacteria                                            |
| Otu1826 | 1        | 1       | 3       | 4       | 2       | 1       | 1        | 0        | 1        | 7        | 3        | 0        | Bacteria; Proteobacteria; Gammaproteobacteria; Legionellales; Coxiellaceae; Aquicella   |
| Otu1827 | 0        | 3       | 2       | 5       | 1       | 4       | 5        | 0        | 3        | 1        | 3        | 1        | Bacteria                                                                                |
| Otu1820 | 0        | 0       | 0       | 2       | 2       | 0       | 3        | 1        | 1        | 1        | 5        | 2        | Bacteria; Cyanobacteria; Chloroplast; Streptophyta                                      |
| Otu1821 | 0        | 0       | 0       | 0       | 2       | 0       | 0        | 0        | 0        | 0        | 5        | 0        | Bacteria; Chloroflexi; Chloroflexi; Roseiflexales; Kouleothrixaceae                     |
| Otu1822 | 0        | 1       | 1       | 0       | 0       | 0       | 1        | 0        | 0        | 0        | 6        | 0        | Bacteria; Gemmatimonadetes; Gemmatimonadetes; Gemmatimonadales                          |
| Otu1823 | 0        | 0       | 1       | 1       | 0       | 2       | 6        | 2        | 2        | 0        | 1        | 2        | Bacteria; OD1; SM2F11                                                                   |
| Otu985  | 13       | 10      | 10      | 33      | 11      | 11      | 17       | 12       | 14       | 21       | 20       | 14       | Bacteria; Verrucomicrobia; Pedosphaerae; Pedosphaerales; Ellin517                       |
| Otu984  | 2        | 1       | 0       | 5       | 1       | 2       | 0        | 4        | 15       | 2        | 3        | 4        | Bacteria; Cyanobacteria; 4C0d-2; MLE1-12                                                |
| Otu987  | 16       | 8       | 2       | 2       | 5       | 6       | 6        | 2        | 6        | 7        | 3        | 6        | Bacteria; Bacteroidetes; Saprospirae; Saprospirales; Chitinophagaceae                   |
| Otu986  | 7        | 4       | 2       | 2       | 2       | 1       | 6        | 2        | 2        | 0        | 2        | 1        | Bacteria; Proteobacteria; Alphaproteobacteria; Rhizobiales; Bradyrhizobiaceae           |
| Otu981  | 8        | 0       | 0       | 0       | 0       | 0       | 2        | 0        | 0        | 0        | 0        | 0        | Bacteria; Proteobacteria; Gammaproteobacteria; Legionellales                            |

| #OTU ID | Z31DSO1r | Z31DSO2 | Z31DSO3 | Z31DSO4 | Z31DSO5 | Z31DSO6 | Z31JDSO1 | Z31JDSO2 | Z31JDSO3 | Z31JDSO4 | Z31JDSO5 | Z31JDSO6 | taxonomy                                                                                                                  |
|---------|----------|---------|---------|---------|---------|---------|----------|----------|----------|----------|----------|----------|---------------------------------------------------------------------------------------------------------------------------|
| Otu980  | 13       | 2       | 3       | 5       | 4       | 0       | 5        | 1        | 3        | 1        | 5        | 2        | Bacteria; Proteobacteria; Alphaproteobacteria; Rhodospirillales; Rhodospirillaceae                                        |
| Otu983  | 5        | 11      | 6       | 9       | 10      | 7       | 1        | 2        | 7        | 4        | 6        | 6        | Bacteria; Verrucomicrobia; Pedosphaerae; Pedosphaerales; auto67_4W                                                        |
| Otu982  | 4        | 3       | 3       | 4       | 6       | 1       | 0        | 3        | 1        | 6        | 10       | 3        | Bacteria; Gemmatimonadetes; Gemmatimonadetes                                                                              |
| Otu2326 | 1        | 0       | 1       | 0       | 2       | 0       | 0        | 0        | 0        | 0        | 0        | 0        | Bacteria; Chloroflexi; Chloroflexi; Roseiflexales; Kouleothrixaceae                                                       |
| Otu2327 | 5        | 0       | 1       | 2       | 1       | 0       | 4        | 1        | 1        | 1        | 2        | 2        | Bacteria; Armatimonadetes; Chthonomonadetes; Chthonomonadales; Chthonomonadaceae                                          |
| Otu2324 | 207      | 105     | 179     | 175     | 112     | 70      | 189      | 80       | 130      | 203      | 154      | 137      | Bacteria; Proteobacteria; Betaproteobacteria; Burkholderiales; Comamonadaceae                                             |
| Otu339  | 71       | 20      | 26      | 34      | 18      | 24      | 25       | 16       | 23       | 20       | 32       | 16       | Bacteria; Planctomycetes; Phycisphaerae; WD2101                                                                           |
| Otu989  | 4        | 2       | 7       | 15      | 3       | 5       | 0        | 1        | 2        | 15       | 2        | 4        | Bacteria; Chloroflexi; Anaerolineae; SBR1031; oc28                                                                        |
| Otu988  | 0        | 0       | 3       | 6       | 3       | 0       | 0        | 0        | 11       | 2        | 1        | 5        | Bacteria; Bacteroidetes; Flavobacteriia; Flavobacteriales; Flavobacteriaceae; Flavobacterium                              |
| Otu2320 | 3        | 3       | 2       | 3       | 7       | 4       | 3        | 0        | 3        | 2        | 4        | 0        | Bacteria; Actinobacteria; Thermoleophilia; Solirubrobacterales                                                            |
| Otu2321 | 0        | 1       | 0       | 0       | 0       | 0       | 3        | 1        | 3        | 1        | 0        | 1        | Bacteria; Chlamydiae; Chlamydia; Chlamydiales                                                                             |
| Otu336  | 43       | 7       | 8       | 10      | 5       | 8       | 6        | 5        | 3        | 3        | 14       | 4        | Bacteria; Proteobacteria; Deltaproteobacteria; Myxococcales                                                               |
| Otu1755 | 3        | 0       | 2       | 1       | 1       | 0       | 1        | 1        | 0        | 0        | 4        | 1        | Bacteria; Planctomycetes; Phycisphaerae; WD2101                                                                           |
| Otu337  | 2        | 0       | 2       | 0       | 0       | 1       | 43       | 0        | 0        | 17       | 1        | 2        | Bacteria; Proteobacteria; Alphaproteobacteria; Sphingomonadales; Sphingomonadaceae; Sphingopyxis; Sphingopyxis_alaskensis |
| Otu1796 | 2        | 1       | 0       | 7       | 1       | 7       | 8        | 6        | 8        | 7        | 3        | 5        | Bacteria; Proteobacteria; Deltaproteobacteria; Myxococcales                                                               |
| Otu1797 | 4        | 2       | 1       | 1       | 4       | 2       | 1        | 1        | 0        | 2        | 3        | 0        | Bacteria; Nitrospirae; Nitrospira; Nitrospirales; 0319-6A21                                                               |
| Otu1794 | 1        | 2       | 3       | 2       | 2       | 2       | 1        | 0        | 9        | 3        | 5        | 0        | Bacteria; Chloroflexi; Anaerolineae; A31                                                                                  |
| Otu1795 | 4        | 0       | 0       | 0       | 0       | 2       | 2        | 3        | 5        | 3        | 2        | 3        | Bacteria; Elusimicrobia; Elusimicrobia; FAC88                                                                             |
| Otu1792 | 0        | 5       | 0       | 2       | 0       | 4       | 1        | 1        | 0        | 2        | 2        | 3        | Bacteria; Proteobacteria; Deltaproteobacteria; Bdellovibrionales; Bdellovibrionaceae; Bdellovibrio                        |
| Otu1793 | 0        | 1       | 1       | 6       | 0       | 0       | 2        | 0        | 0        | 0        | 0        | 0        | Bacteria; Proteobacteria; Gammaproteobacteria; Legionellales                                                              |
| Otu1790 | 0        | 4       | 3       | 1       | 1       | 1       | 4        | 1        | 2        | 2        | 6        | 1        | Bacteria; Firmicutes; Clostridia; Clostridiales; Clostridiaceae                                                           |
| Otu1791 | 0        | 0       | 2       | 1       | 0       | 1       | 1        | 0        | 1        | 0        | 5        | 0        | Bacteria; Actinobacteria; Acidimicrobia; Acidimicrobiales; EB1017                                                         |

| #OTU ID | Z31DSO1r | Z31DSO2 | Z31DSO3 | Z31DSO4 | Z31DSO5 | Z31DSO6 | Z31JDSO1 | Z31JDSO2 | Z31JDSO3 | Z31JDSO4 | Z31JDSO5 | Z31JDSO6 | taxonomy                                                                                                           |
|---------|----------|---------|---------|---------|---------|---------|----------|----------|----------|----------|----------|----------|--------------------------------------------------------------------------------------------------------------------|
| Otu3190 | 0        | 3       | 4       | 1       | 1       | 2       | 2        | 1        | 1        | 1        | 3        | 1        | Bacteria; Actinobacteria; Thermoleophilia; Gaiellales; Gaiellaceae                                                 |
| Otu1798 | 0        | 0       | 0       | 0       | 0       | 1       | 0        | 1        | 1        | 4        | 1        | 2        | Bacteria; Planctomycetes; Phycisphaerae; WD2101                                                                    |
| Otu1799 | 13       | 4       | 10      | 24      | 9       | 3       | 14       | 5        | 8        | 14       | 20       | 1        | Bacteria; Chloroflexi; TK10; AKYG885; Dolo_23                                                                      |
| Otu2223 | 6        | 7       | 1       | 1       | 1       | 1       | 1        | 4        | 0        | 2        | 3        | 2        | Bacteria; Gemmatimonadetes; Gemm-1                                                                                 |
| Otu2222 | 1        | 1       | 0       | 1       | 2       | 0       | 1        | 4        | 1        | 3        | 7        | 2        | Bacteria; Proteobacteria                                                                                           |
| Otu2221 | 0        | 0       | 0       | 3       | 0       | 1       | 0        | 0        | 0        | 0        | 1        | 0        | Bacteria; Proteobacteria; Alphaproteobacteria; Rickettsiales                                                       |
| Otu2220 | 3        | 1       | 0       | 2       | 0       | 0       | 0        | 2        | 0        | 1        | 0        | 0        | Bacteria; Verrucomicrobia; Spartobacteria; Chthoniobacteriales; Chthoniobacteraceae; heteroC45_4W                  |
| Otu2227 | 60       | 6       | 14      | 6       | 3       | 5       | 52       | 7        | 8        | 3        | 6        | 15       | Bacteria; Proteobacteria; Gammaproteobacteria; Xanthomonadales; Xanthomonadaceae                                   |
| Otu2226 | 9        | 2       | 1       | 5       | 0       | 1       | 7        | 2        | 3        | 3        | 4        | 2        | Bacteria; Verrucomicrobia; Spartobacteria; Chthoniobacteriales; Chthoniobacteraceae                                |
| Otu2225 | 0        | 3       | 2       | 0       | 1       | 2       | 0        | 4        | 5        | 1        | 2        | 2        | Bacteria; Bacteroidetes; Saprospirae; Saprospirales                                                                |
| Otu2224 | 29       | 37      | 8       | 13      | 6       | 3       | 35       | 10       | 2        | 19       | 10       | 3        | Bacteria; Acidobacteria; Chloracidobacteria; RB41; Ellin6075                                                       |
| Otu3196 | 0        | 0       | 0       | 0       | 0       | 1       | 0        | 1        | 1        | 0        | 0        | 3        | Bacteria; Chloroflexi; Ktedonobacteria; Ktedonobacteriales; Ktedonobacteraceae                                     |
| Otu2229 | 0        | 0       | 2       | 0       | 0       | 0       | 4        | 2        | 1        | 2        | 0        | 0        | Bacteria; TM6; SJA-4                                                                                               |
| Otu2228 | 3        | 0       | 0       | 0       | 0       | 0       | 0        | 0        | 0        | 0        | 0        | 0        | Bacteria                                                                                                           |
| Otu3197 | 2        | 0       | 0       | 0       | 0       | 0       | 0        | 0        | 0        | 0        | 0        | 0        | Bacteria                                                                                                           |
| Otu3318 | 2        | 0       | 0       | 0       | 1       | 1       | 0        | 0        | 0        | 1        | 0        | 0        | Bacteria                                                                                                           |
| Otu3194 | 0        | 0       | 0       | 1       | 0       | 0       | 0        | 0        | 0        | 2        | 0        | 0        | Bacteria; OD1; ZB2                                                                                                 |
| Otu3314 | 0        | 0       | 0       | 1       | 0       | 0       | 0        | 2        | 0        | 0        | 0        | 0        | Bacteria; FBP                                                                                                      |
| Otu3315 | 2        | 0       | 0       | 0       | 0       | 0       | 0        | 0        | 0        | 0        | 0        | 0        | Bacteria; Proteobacteria; Gammaproteobacteria                                                                      |
| Otu3316 | 2        | 0       | 2       | 1       | 1       | 0       | 1        | 0        | 0        | 1        | 1        | 0        | Bacteria; Chloroflexi; Anaerolineae; Caldilineales; Caldilineaceae                                                 |
| Otu3195 | 0        | 1       | 0       | 0       | 0       | 0       | 0        | 0        | 0        | 3        | 0        | 0        | Bacteria; Gemmatimonadetes; Gemmatimonadetes                                                                       |
| Otu3310 | 0        | 0       | 0       | 0       | 0       | 0       | 0        | 0        | 0        | 0        | 3        | 0        | Bacteria; Proteobacteria; Alphaproteobacteria; Rickettsiales; mitochondria; Acanthamoeba; Acanthamoeba_castellanii |

| #OTU ID | Z31DSO1r | Z31DSO2 | Z31DSO3 | Z31DSO4 | Z31DSO5 | Z31DSO6 | Z31J1DSO1 | Z31J1DSO2 | Z31J1DSO3 | Z31J1DSO4 | Z31J1DSO5 | Z31J1DSO6 | taxonomy                                                                                           |
|---------|----------|---------|---------|---------|---------|---------|-----------|-----------|-----------|-----------|-----------|-----------|----------------------------------------------------------------------------------------------------|
| Otu3311 | 0        | 0       | 0       | 0       | 0       | 2       | 0         | 0         | 0         | 0         | 0         | 0         | Bacteria                                                                                           |
| Otu3312 | 0        | 0       | 0       | 2       | 0       | 0       | 0         | 0         | 0         | 0         | 0         | 0         | Bacteria; Proteobacteria                                                                           |
| Otu3313 | 2        | 1       | 1       | 2       | 1       | 0       | 0         | 0         | 0         | 0         | 3         | 0         | Bacteria; Proteobacteria; Deltaproteobacteria; Bdellovibrionales; Bdellovibrionaceae; Bdellovibrio |
| Otu3179 | 2        | 0       | 0       | 0       | 0       | 0       | 0         | 0         | 0         | 0         | 0         | 0         | Bacteria; Planctomycetes; Planctomycetia; Pirellulales; Pirellulaceae; Pirellula                   |
| Otu3360 | 0        | 0       | 0       | 2       | 0       | 0       | 0         | 0         | 0         | 0         | 2         | 0         | Bacteria; Proteobacteria; Deltaproteobacteria; NB1-j                                               |
| Otu2927 | 0        | 0       | 0       | 1       | 0       | 0       | 1         | 2         | 1         | 1         | 1         | 2         | Bacteria; Proteobacteria; Alphaproteobacteria                                                      |
| Otu3217 | 0        | 0       | 0       | 0       | 0       | 2       | 0         | 0         | 0         | 1         | 0         | 0         | Bacteria                                                                                           |
| Otu3216 | 5        | 0       | 2       | 0       | 1       | 0       | 0         | 0         | 0         | 0         | 2         | 0         | Bacteria; Acidobacteria; Solibacteres; Solibacterales; AKIW659                                     |
| Otu1644 | 4        | 3       | 5       | 1       | 0       | 2       | 1         | 0         | 1         | 4         | 4         | 1         | Bacteria; Proteobacteria; Gammaproteobacteria; Xanthomonadales; Sinobacteraceae                    |
| Otu1645 | 2        | 3       | 3       | 6       | 2       | 0       | 0         | 1         | 1         | 1         | 3         | 0         | Bacteria; Planctomycetes; Planctomycetia; Gemmatales; Gemmataceae; Gemmata                         |
| Otu1646 | 4        | 0       | 2       | 2       | 0       | 0       | 1         | 0         | 0         | 1         | 2         | 1         | Bacteria; Planctomycetes; Planctomycetia; Gemmatales; Gemmataceae                                  |
| Otu1647 | 0        | 0       | 0       | 2       | 0       | 0       | 5         | 0         | 0         | 0         | 1         | 0         | Bacteria; Bacteroidetes; Saprospirae; Saprospirales; Chitinophagaceae                              |
| Otu1640 | 0        | 0       | 0       | 0       | 0       | 1       | 0         | 4         | 0         | 0         | 0         | 1         | Bacteria; Armatimonadetes; Fimbriimonadia; Fimbriimonadales; Fimbriimonadaceae                     |
| Otu1641 | 5        | 0       | 1       | 0       | 0       | 0       | 0         | 1         | 0         | 0         | 3         | 0         | Bacteria; Actinobacteria; Acidimicrobia; Acidimicrobiales; EB1017                                  |
| Otu1642 | 8        | 4       | 2       | 3       | 5       | 14      | 1         | 3         | 10        | 12        | 8         | 8         | Bacteria; Elusimicrobia; Elusimicrobia; I1b                                                        |
| Otu1643 | 15       | 6       | 4       | 7       | 19      | 13      | 4         | 5         | 9         | 20        | 11        | 14        | Bacteria; Verrucomicrobia; Pedosphaerae; Pedosphaerales; Ellin517                                  |
| Otu2137 | 1        | 2       | 1       | 5       | 6       | 2       | 2         | 0         | 5         | 1         | 7         | 0         | Bacteria; Proteobacteria; Gammaproteobacteria; Legionellales; Coxiellaceae                         |
| Otu2136 | 0        | 1       | 0       | 1       | 2       | 0       | 3         | 1         | 0         | 0         | 2         | 1         | Bacteria; Proteobacteria; Deltaproteobacteria; Myxococcales                                        |
| Otu2135 | 3        | 1       | 0       | 0       | 0       | 0       | 0         | 0         | 0         | 0         | 0         | 0         | Bacteria; Planctomycetes; Phycisphaerae; WD2101                                                    |
| Otu2134 | 2        | 2       | 0       | 4       | 3       | 2       | 3         | 1         | 2         | 4         | 3         | 1         | Bacteria; Proteobacteria; Alphaproteobacteria; Rhodospirillales; Rhodospirillaceae                 |
| Otu1648 | 0        | 1       | 5       | 5       | 2       | 1       | 2         | 1         | 2         | 4         | 9         | 0         | Bacteria; Cyanobacteria; Chloroplast; Chlorophyta; Chlamydomonadaceae                              |
| Otu1649 | 8        | 3       | 1       | 2       | 1       | 2       | 2         | 2         | 0         | 2         | 2         | 2         | Bacteria; Acidobacteria; Acidobacteria-6; iii1-15; RB40                                            |

| #OTU ID | Z31DSO1r | Z31DSO2 | Z31DSO3 | Z31DSO4 | Z31DSO5 | Z31DSO6 | Z31JDSO1 | Z31JDSO2 | Z31JDSO3 | Z31JDSO4 | Z31JDSO5 | Z31JDSO6 | taxonomy                                                                                            |
|---------|----------|---------|---------|---------|---------|---------|----------|----------|----------|----------|----------|----------|-----------------------------------------------------------------------------------------------------|
| Otu2131 | 3        | 1       | 0       | 0       | 0       | 0       | 1        | 0        | 0        | 0        | 0        | 0        | Bacteria; Proteobacteria; Deltaproteobacteria; MIZ46                                                |
| Otu2130 | 0        | 0       | 1       | 0       | 1       | 0       | 0        | 0        | 0        | 0        | 3        | 0        | Bacteria; Chloroflexi; Thermomicrobia                                                               |
| Otu58   | 193      | 30      | 26      | 28      | 22      | 9       | 16       | 10       | 14       | 42       | 41       | 11       | Bacteria; Gemmatimonadetes; Gemmatimonadetes; N1423WL                                               |
| Otu59   | 29       | 29      | 54      | 81      | 36      | 171     | 70       | 79       | 109      | 54       | 38       | 53       | Bacteria; Chloroflexi; Anaerolineae; SBR1031; A4b                                                   |
| Otu50   | 111      | 57      | 210     | 197     | 56      | 62      | 152      | 40       | 162      | 88       | 86       | 52       | Bacteria; Verrucomicrobia; Spartobacteria; Chthoniobacteriales; Chthoniobacteraceae; Chthoniobacter |
| Otu51   | 265      | 55      | 76      | 76      | 71      | 17      | 68       | 30       | 53       | 41       | 118      | 19       | Bacteria; Acidobacteria; Solibacteres; Solibacteriales                                              |
| Otu52   | 49       | 96      | 127     | 149     | 100     | 75      | 225      | 56       | 88       | 118      | 180      | 35       | Bacteria; Proteobacteria; Betaproteobacteria; Nitrosomonadales; Nitrosomonadaceae                   |
| Otu53   | 60       | 18      | 207     | 144     | 40      | 52      | 221      | 52       | 38       | 56       | 128      | 68       | Bacteria; Actinobacteria; Actinobacteria; Actinomycetales; Nocardiaaceae; Rhodococcus               |
| Otu54   | 0        | 0       | 0       | 3       | 5       | 1       | 38       | 2        | 11       | 332      | 0        | 4        | Bacteria; Bacteroidetes; Cytophagia; Cytophagales; Cytophagaceae; Dyadobacter                       |
| Otu55   | 251      | 129     | 204     | 161     | 74      | 83      | 330      | 92       | 100      | 117      | 88       | 224      | Bacteria; Proteobacteria; Betaproteobacteria; Burkholderiales; Oxalobacteraceae; Janthinobacterium  |
| Otu56   | 101      | 80      | 67      | 162     | 91      | 43      | 141      | 106      | 107      | 133      | 164      | 124      | Bacteria; Gemmatimonadetes; Gemmatimonadetes; Gemmatimonadales                                      |
| Otu57   | 761      | 326     | 372     | 656     | 266     | 386     | 617      | 436      | 523      | 562      | 604      | 477      | Bacteria; Proteobacteria; Betaproteobacteria; SC-I-84                                               |
| Otu3174 | 4        | 0       | 1       | 6       | 1       | 0       | 1        | 3        | 3        | 0        | 2        | 1        | Bacteria; Gemmatimonadetes; Gemmatimonadetes; Ellin5290                                             |
| Otu2116 | 28       | 8       | 1       | 3       | 4       | 1       | 2        | 3        | 3        | 6        | 6        | 2        | Bacteria; Acidobacteria; Acidobacteria-6; iii1-15                                                   |
| Otu240  | 7        | 2       | 2       | 4       | 1       | 4       | 12       | 60       | 14       | 8        | 3        | 14       | Bacteria; Proteobacteria; Alphaproteobacteria                                                       |
| Otu2911 | 2        | 1       | 2       | 4       | 2       | 3       | 1        | 0        | 1        | 1        | 0        | 0        | Bacteria; Verrucomicrobia; Spartobacteria; Chthoniobacteriales; Chthoniobacteraceae                 |
| Otu2910 | 0        | 1       | 0       | 1       | 1       | 0       | 0        | 0        | 0        | 0        | 0        | 4        | Bacteria; Bacteroidetes; Cytophagia; Cytophagales; Cytophagaceae; Hymenobacter                      |
| Otu2913 | 2        | 0       | 0       | 0       | 1       | 0       | 0        | 1        | 0        | 0        | 1        | 1        | Bacteria; Planctomycetes; Planctomycetia; Gemmatales; Gemmataceae                                   |
| Otu2912 | 0        | 1       | 0       | 0       | 0       | 0       | 3        | 0        | 0        | 0        | 0        | 2        | Bacteria; Firmicutes; Bacilli; Bacillales; Alicyclobacillaceae; Alicyclobacillus                    |
| Otu2915 | 0        | 0       | 3       | 1       | 0       | 0       | 0        | 0        | 0        | 0        | 0        | 0        | Bacteria; Chloroflexi; TK10                                                                         |
| Otu2914 | 2        | 0       | 3       | 2       | 0       | 1       | 3        | 2        | 0        | 1        | 3        | 1        | Bacteria; Actinobacteria; Actinobacteria; Actinomycetales; Pseudonocardiaaceae; Actinomycetospora   |
| Otu2917 | 5        | 3       | 9       | 8       | 3       | 1       | 2        | 4        | 2        | 1        | 6        | 1        | Bacteria; Proteobacteria; Deltaproteobacteria; Myxococcales                                         |

| #OTU ID | Z31DSO1r | Z31DSO2 | Z31DSO3 | Z31DSO4 | Z31DSO5 | Z31DSO6 | Z31JDSO1 | Z31JDSO2 | Z31JDSO3 | Z31JDSO4 | Z31JDSO5 | Z31JDSO6 | taxonomy                                                                                     |
|---------|----------|---------|---------|---------|---------|---------|----------|----------|----------|----------|----------|----------|----------------------------------------------------------------------------------------------|
| Otu2916 | 3        | 0       | 0       | 0       | 1       | 0       | 0        | 0        | 1        | 1        | 4        | 1        | Bacteria; Verrucomicrobia; Pedosphaerae; Pedosphaerales                                      |
| Otu2919 | 23       | 12      | 10      | 14      | 13      | 5       | 11       | 6        | 12       | 11       | 20       | 9        | Bacteria; Proteobacteria; Betaproteobacteria                                                 |
| Otu2918 | 0        | 0       | 0       | 2       | 2       | 0       | 2        | 0        | 0        | 1        | 2        | 1        | Bacteria; Proteobacteria; Deltaproteobacteria                                                |
| Otu1253 | 2        | 0       | 1       | 1       | 1       | 0       | 1        | 0        | 0        | 6        | 0        | 1        | Bacteria                                                                                     |
| Otu1252 | 4        | 0       | 0       | 0       | 0       | 0       | 0        | 2        | 0        | 10       | 0        | 4        | Bacteria; Proteobacteria; Alphaproteobacteria; Rickettsiales                                 |
| Otu1251 | 8        | 2       | 2       | 3       | 1       | 0       | 1        | 1        | 0        | 0        | 2        | 0        | Bacteria; Elusimicrobia; Elusimicrobia; MVP-88                                               |
| Otu1250 | 2        | 0       | 12      | 10      | 4       | 11      | 8        | 6        | 6        | 9        | 14       | 6        | Bacteria; Verrucomicrobia; Opitutae; Opitutales; Opitutaceae; Opitutus                       |
| Otu1257 | 0        | 1       | 4       | 1       | 0       | 0       | 1        | 0        | 6        | 6        | 0        | 0        | Bacteria; Bacteroidetes; Saprospirae; Saprospirales; Chitinophagaceae                        |
| Otu1256 | 3        | 1       | 1       | 5       | 0       | 0       | 2        | 2        | 3        | 3        | 0        | 4        | Bacteria                                                                                     |
| Otu1255 | 2        | 0       | 0       | 0       | 0       | 3       | 0        | 0        | 0        | 5        | 4        | 2        | Bacteria; Cyanobacteria; Synechococcophycidae; Pseudanabaenales                              |
| Otu1254 | 17       | 12      | 1       | 14      | 2       | 0       | 6        | 0        | 0        | 0        | 15       | 0        | Bacteria; Bacteroidetes; Flavobacteriia; Flavobacteriales; Flavobacteriaceae; Flavobacterium |
| Otu3146 | 2        | 0       | 0       | 0       | 0       | 0       | 0        | 0        | 0        | 0        | 0        | 0        | Bacteria; Proteobacteria; Alphaproteobacteria                                                |
| Otu1259 | 0        | 3       | 0       | 5       | 1       | 2       | 0        | 1        | 2        | 2        | 1        | 1        | Bacteria; Cyanobacteria; 4C0d-2; MLE1-12                                                     |
| Otu1258 | 5        | 3       | 3       | 12      | 6       | 2       | 6        | 4        | 8        | 7        | 9        | 5        | Bacteria; Planctomycetes; Phycisphaerae; WD2101                                              |
| Otu1495 | 3        | 4       | 2       | 4       | 2       | 0       | 3        | 3        | 1        | 8        | 7        | 5        | Bacteria; Bacteroidetes; Saprospirae; Saprospirales                                          |
| Otu1494 | 1        | 2       | 0       | 2       | 1       | 4       | 1        | 2        | 1        | 2        | 2        | 2        | Bacteria; Planctomycetes; Phycisphaerae; Phycisphaerales                                     |
| Otu1497 | 1        | 0       | 3       | 2       | 3       | 5       | 1        | 0        | 1        | 2        | 2        | 0        | Bacteria; Planctomycetes; Planctomycetia; Gemmatales; Gemmataceae                            |
| Otu1496 | 6        | 5       | 3       | 0       | 4       | 1       | 0        | 0        | 0        | 6        | 4        | 0        | Bacteria; Bacteroidetes; Sphingobacteriia; Sphingobacteriales                                |
| Otu1491 | 4        | 7       | 4       | 4       | 1       | 2       | 10       | 10       | 8        | 5        | 10       | 3        | Bacteria; Proteobacteria; Deltaproteobacteria; MIZ46                                         |
| Otu1490 | 0        | 0       | 0       | 3       | 0       | 1       | 0        | 0        | 0        | 0        | 4        | 0        | Bacteria; Proteobacteria; Alphaproteobacteria; Rickettsiales; mitochondria                   |
| Otu1493 | 2        | 0       | 0       | 3       | 0       | 0       | 1        | 0        | 3        | 1        | 5        | 1        | Bacteria; Proteobacteria                                                                     |
| Otu1492 | 0        | 2       | 0       | 0       | 0       | 0       | 0        | 0        | 1        | 0        | 6        | 0        | Bacteria; OD1; SM2F11                                                                        |

| #OTU ID | Z31DSO1r | Z31DSO2 | Z31DSO3 | Z31DSO4 | Z31DSO5 | Z31DSO6 | Z31JDSO1 | Z31JDSO2 | Z31JDSO3 | Z31JDSO4 | Z31JDSO5 | Z31JDSO6 | taxonomy                                                                                          |
|---------|----------|---------|---------|---------|---------|---------|----------|----------|----------|----------|----------|----------|---------------------------------------------------------------------------------------------------|
| Otu1499 | 0        | 2       | 2       | 0       | 0       | 0       | 6        | 0        | 0        | 0        | 1        | 0        | Bacteria; Gemmatimonadetes; Gemmatimonadetes; Ellin5290                                           |
| Otu349  | 4        | 2       | 2       | 51      | 2       | 8       | 3        | 0        | 9        | 2        | 71       | 0        | Bacteria; Cyanobacteria; Nostocophycidae; Nostocales; Nostocaceae                                 |
| Otu348  | 36       | 6       | 10      | 33      | 9       | 17      | 39       | 32       | 38       | 38       | 20       | 40       | Bacteria; Acidobacteria; Acidobacteriia; Acidobacteriales; Koribacteraceae; Candidatus_Koribacter |
| Otu439  | 35       | 8       | 14      | 21      | 8       | 12      | 12       | 15       | 16       | 19       | 14       | 10       | Bacteria; Acidobacteria; Acidobacteria-6; CCU21                                                   |
| Otu438  | 23       | 12      | 8       | 4       | 4       | 0       | 8        | 0        | 2        | 6        | 19       | 1        | Bacteria; Chloroflexi; TK10                                                                       |
| Otu3466 | 0        | 0       | 0       | 1       | 0       | 0       | 1        | 0        | 0        | 0        | 5        | 1        | Bacteria; Bacteroidetes; Cytophagia; Cytophagales; Cytophagaceae; Hymenobacter                    |
| Otu3467 | 0        | 1       | 1       | 0       | 0       | 0       | 2        | 0        | 1        | 0        | 0        | 0        | Bacteria; Planctomycetes; Phycisphaerae; Phycisphaerales                                          |
| Otu3464 | 1        | 0       | 2       | 2       | 0       | 0       | 2        | 0        | 1        | 1        | 1        | 1        | Bacteria; Proteobacteria; Gammaproteobacteria; Legionellales; Coxiellaceae                        |
| Otu3465 | 14       | 10      | 4       | 6       | 4       | 1       | 0        | 3        | 1        | 16       | 6        | 6        | Bacteria; Bacteroidetes; Sphingobacteriia; Sphingobacteriales                                     |
| Otu3462 | 3        | 0       | 0       | 0       | 0       | 0       | 0        | 0        | 0        | 0        | 0        | 0        | Bacteria; Chloroflexi; TK10                                                                       |
| Otu3463 | 0        | 1       | 1       | 0       | 0       | 0       | 2        | 0        | 1        | 0        | 5        | 0        | Bacteria; Proteobacteria; Deltaproteobacteria; Myxococcales; Polyangiaceae                        |
| Otu3460 | 2        | 1       | 0       | 0       | 0       | 1       | 0        | 0        | 0        | 1        | 0        | 0        | Bacteria; Armatimonadetes; Chthonomonadetes; Chthonomonadales; Chthonomonadaceae                  |
| Otu3461 | 6        | 3       | 4       | 4       | 9       | 2       | 4        | 2        | 5        | 5        | 7        | 6        | Bacteria; Proteobacteria; Deltaproteobacteria; Myxococcales                                       |
| Otu3468 | 2        | 1       | 2       | 0       | 0       | 0       | 1        | 0        | 0        | 0        | 0        | 2        | Bacteria; Bacteroidetes; Saprospirae; Saprospirales; Chitinophagaceae                             |
| Otu3469 | 2        | 0       | 0       | 0       | 0       | 0       | 0        | 0        | 0        | 0        | 0        | 0        | Bacteria                                                                                          |
| Otu343  | 14       | 7       | 5       | 8       | 5       | 6       | 51       | 7        | 15       | 11       | 4        | 35       | Bacteria; Proteobacteria; Betaproteobacteria; Rhodocyclales; Rhodocyclaceae; Uliginosibacterium   |
| Otu342  | 30       | 7       | 10      | 39      | 8       | 22      | 33       | 31       | 30       | 29       | 29       | 20       | Bacteria; Planctomycetes; Phycisphaerae; WD2101                                                   |
| Otu341  | 46       | 16      | 8       | 3       | 12      | 3       | 9        | 8        | 6        | 12       | 28       | 5        | Bacteria; Nitrospirae; Nitrospira; Nitrospirales; Nitrospiraceae; Nitrospira                      |
| Otu340  | 18       | 17      | 8       | 14      | 6       | 9       | 20       | 16       | 25       | 34       | 21       | 12       | Bacteria; Actinobacteria; Thermoleophilia; Gaiellales; Gaiellaceae                                |
| Otu3147 | 1        | 2       | 0       | 0       | 0       | 0       | 0        | 0        | 0        | 0        | 0        | 0        | Bacteria; Nitrospirae; Nitrospira; Nitrospirales; 0319-6A21                                       |
| Otu347  | 18       | 10      | 20      | 41      | 15      | 15      | 12       | 14       | 28       | 13       | 15       | 11       | Bacteria; Proteobacteria; Deltaproteobacteria; Myxococcales; Haliangiaceae                        |
| Otu346  | 0        | 1       | 0       | 0       | 1       | 7       | 1        | 3        | 4        | 28       | 0        | 33       | Bacteria; Proteobacteria; Gammaproteobacteria; Legionellales; Coxiellaceae; Rickettsiella         |

| #OTU ID | Z31DSO1r | Z31DSO2 | Z31DSO3 | Z31DSO4 | Z31DSO5 | Z31DSO6 | Z31JDSO1 | Z31JDSO2 | Z31JDSO3 | Z31JDSO4 | Z31JDSO5 | Z31JDSO6 | taxonomy                                                                                                                  |
|---------|----------|---------|---------|---------|---------|---------|----------|----------|----------|----------|----------|----------|---------------------------------------------------------------------------------------------------------------------------|
| Otu345  | 3        | 22      | 17      | 57      | 5       | 8       | 6        | 3        | 13       | 0        | 3        | 0        | Bacteria; Proteobacteria; Gammaproteobacteria; Legionellales                                                              |
| Otu344  | 0        | 2       | 1       | 3       | 32      | 1       | 1        | 1        | 7        | 4        | 0        | 0        | Bacteria; Chlamydiae; Chlamydia; Chlamydiales                                                                             |
| Otu512  | 2        | 1       | 1       | 7       | 4       | 11      | 4        | 15       | 1        | 0        | 0        | 23       | Bacteria; Proteobacteria; Gammaproteobacteria; Pseudomonadales; Moraxellaceae; Acinetobacter; Acinetobacter_rhizosphaerae |
| Otu513  | 31       | 15      | 16      | 25      | 14      | 17      | 29       | 11       | 19       | 28       | 18       | 25       | Bacteria; Acidobacteria; Sva0725; Sva0725                                                                                 |
| Otu510  | 34       | 15      | 17      | 29      | 16      | 11      | 11       | 4        | 3        | 16       | 27       | 8        | Bacteria; Verrucomicrobia; Spartobacteria; Chthoniobacteriales; Chthoniobacteraceae                                       |
| Otu511  | 58       | 24      | 9       | 18      | 12      | 6       | 9        | 2        | 6        | 7        | 24       | 10       | Bacteria; Proteobacteria; Gammaproteobacteria; Xanthomonadales; Xanthomonadaceae                                          |
| Otu516  | 3        | 1       | 0       | 8       | 4       | 5       | 1        | 5        | 20       | 14       | 8        | 19       | Bacteria; Planctomycetes; vadinHA49; DH61                                                                                 |
| Otu517  | 103      | 58      | 51      | 45      | 24      | 45      | 57       | 35       | 52       | 59       | 57       | 48       | Bacteria; Proteobacteria; Alphaproteobacteria; Rhizobiales; Hyphomicrobiaceae; Rhodoplanes                                |
| Otu514  | 10       | 9       | 7       | 15      | 22      | 12      | 7        | 1        | 5        | 4        | 10       | 5        | Bacteria; Proteobacteria; Deltaproteobacteria; Myxococcales; Myxococcaceae; Anaeromyxobacter                              |
| Otu515  | 5        | 2       | 6       | 25      | 1       | 1       | 17       | 3        | 8        | 10       | 0        | 8        | Bacteria; Bacteroidetes; Saprospirae; Saprospirales; Chitinophagaceae; Niabella                                           |
| Otu518  | 9        | 4       | 6       | 17      | 6       | 10      | 1        | 1        | 5        | 9        | 13       | 2        | Bacteria; Planctomycetes; Planctomycetia; Planctomycetales; Planctomycetaceae; Planctomyces                               |
| Otu519  | 16       | 20      | 7       | 17      | 10      | 10      | 28       | 5        | 7        | 4        | 32       | 5        | Bacteria; Actinobacteria; Thermoleophilii; Gaiellales; Gaiellaceae                                                        |
| Otu1079 | 0        | 0       | 10      | 3       | 8       | 10      | 9        | 2        | 10       | 6        | 21       | 2        | Bacteria; Cyanobacteria; Chloroplast; Stramenopiles                                                                       |
| Otu1078 | 6        | 1       | 2       | 1       | 0       | 4       | 7        | 1        | 3        | 3        | 3        | 2        | Bacteria; Proteobacteria; Alphaproteobacteria; Rhizobiales; Hyphomicrobiaceae; Hyphomicrobium                             |
| Otu1073 | 0        | 1       | 0       | 0       | 8       | 4       | 0        | 0        | 0        | 0        | 2        | 0        | Bacteria; Proteobacteria; Deltaproteobacteria; Desulfuromonadales; Geobacteraceae; Geobacter                              |
| Otu1072 | 13       | 17      | 19      | 6       | 6       | 8       | 5        | 25       | 13       | 11       | 12       | 10       | Bacteria; Proteobacteria; Betaproteobacteria; Burkholderiales; Oxalobacteraceae                                           |
| Otu1071 | 6        | 20      | 4       | 4       | 5       | 5       | 6        | 2        | 22       | 11       | 2        | 2        | Bacteria; Bacteroidetes; Cytophagia; Cytophagales; Cytophagaceae                                                          |
| Otu1070 | 8        | 1       | 3       | 7       | 6       | 2       | 5        | 1        | 3        | 1        | 6        | 0        | Bacteria; Chloroflexi; Anaerolineae; A31                                                                                  |
| Otu1077 | 2        | 3       | 3       | 1       | 4       | 0       | 0        | 0        | 1        | 4        | 7        | 7        | Bacteria; Bacteroidetes; Sphingobacteriia; Sphingobacteriales                                                             |
| Otu1076 | 5        | 0       | 2       | 2       | 1       | 2       | 5        | 6        | 3        | 0        | 3        | 9        | Bacteria; Verrucomicrobia; Pedosphaerae; Pedosphaerales; auto67_4W                                                        |
| Otu1075 | 0        | 0       | 0       | 7       | 0       | 0       | 0        | 4        | 5        | 2        | 6        | 1        | Bacteria                                                                                                                  |
| Otu1074 | 0        | 1       | 9       | 1       | 1       | 1       | 1        | 0        | 0        | 1        | 2        | 0        | Bacteria; Acidobacteria; Solibacteres; Solibacteriales                                                                    |





| #OTU ID | Z31DSO1r | Z31DSO2 | Z31DSO3 | Z31DSO4 | Z31DSO5 | Z31DSO6 | Z31JDSO1 | Z31JDSO2 | Z31JDSO3 | Z31JDSO4 | Z31JDSO5 | Z31JDSO6 | taxonomy                                                                                      |
|---------|----------|---------|---------|---------|---------|---------|----------|----------|----------|----------|----------|----------|-----------------------------------------------------------------------------------------------|
| Otu2515 | 0        | 0       | 0       | 0       | 0       | 3       | 0        | 3        | 0        | 0        | 0        | 0        | Bacteria; Proteobacteria; Gammaproteobacteria; Enterobacteriales; Enterobacteriaceae; Erwinia |
| Otu2514 | 0        | 2       | 0       | 0       | 0       | 0       | 0        | 0        | 0        | 0        | 0        | 0        | Bacteria; Planctomycetes; Planctomycetia; Planctomycetales; Planctomycetaceae; Planctomyces   |
| Otu1107 | 8        | 3       | 1       | 2       | 0       | 0       | 2        | 0        | 1        | 2        | 5        | 1        | Bacteria; Proteobacteria; Deltaproteobacteria; Syntrophobacteriales; Syntrophobacteraceae     |
| Otu1106 | 0        | 5       | 4       | 6       | 3       | 3       | 3        | 2        | 3        | 2        | 6        | 5        | Bacteria; Proteobacteria; Deltaproteobacteria; Myxococcales; Polyangiaceae                    |
| Otu1105 | 6        | 1       | 6       | 4       | 3       | 2       | 3        | 0        | 2        | 1        | 7        | 4        | Bacteria; Chloroflexi; Anaerolineae; A31                                                      |
| Otu1104 | 6        | 9       | 4       | 2       | 7       | 0       | 0        | 0        | 0        | 6        | 8        | 2        | Bacteria; Bacteroidetes; Saprospirae; Saprospirales; Chitinophagaceae                         |
| Otu358  | 10       | 4       | 11      | 15      | 6       | 10      | 37       | 22       | 15       | 14       | 14       | 15       | Bacteria; Proteobacteria; Deltaproteobacteria; Myxococcales                                   |
| Otu359  | 5        | 12      | 14      | 19      | 15      | 11      | 11       | 8        | 23       | 15       | 30       | 4        | Bacteria; Chloroflexi; C0119                                                                  |
| Otu428  | 18       | 18      | 22      | 20      | 9       | 25      | 56       | 15       | 53       | 11       | 29       | 14       | Bacteria; Actinobacteria; Actinobacteria; Actinomycetales; Micromonosporaceae                 |
| Otu429  | 46       | 29      | 31      | 82      | 28      | 32      | 46       | 28       | 60       | 54       | 49       | 58       | Bacteria; Proteobacteria; Betaproteobacteria; Burkholderiales; Oxalobacteraceae               |
| Otu354  | 17       | 10      | 25      | 15      | 9       | 13      | 49       | 15       | 24       | 8        | 24       | 18       | Bacteria; Actinobacteria; Actinobacteria; Actinomycetales; Nocardioidaceae                    |
| Otu355  | 29       | 12      | 33      | 31      | 20      | 17      | 30       | 21       | 12       | 25       | 73       | 26       | Bacteria; Actinobacteria; Actinobacteria; Actinomycetales; Sporichthyaceae                    |
| Otu356  | 14       | 8       | 17      | 12      | 3       | 8       | 15       | 5        | 10       | 11       | 42       | 9        | Bacteria; Actinobacteria; Actinobacteria; Actinomycetales; Micromonosporaceae                 |
| Otu357  | 44       | 23      | 19      | 28      | 19      | 8       | 4        | 2        | 0        | 13       | 38       | 2        | Bacteria; Bacteroidetes; Saprospirae; Saprospirales; Chitinophagaceae                         |
| Otu350  | 62       | 1       | 13      | 13      | 4       | 15      | 18       | 4        | 7        | 1        | 23       | 5        | Bacteria; Proteobacteria; Gammaproteobacteria; Xanthomonadales; Xanthomonadaceae; Dyella      |
| Otu351  | 13       | 9       | 15      | 31      | 11      | 11      | 27       | 26       | 33       | 25       | 19       | 11       | Bacteria; Planctomycetes; Phycisphaerae; WD2101                                               |
| Otu1109 | 3        | 3       | 2       | 3       | 4       | 2       | 3        | 2        | 1        | 2        | 6        | 5        | Bacteria; Proteobacteria; Gammaproteobacteria                                                 |
| Otu353  | 0        | 4       | 5       | 26      | 1       | 1       | 4        | 1        | 10       | 0        | 5        | 0        | Bacteria; Proteobacteria; Gammaproteobacteria; Legionellales                                  |
| Otu646  | 8        | 5       | 6       | 12      | 2       | 7       | 25       | 14       | 11       | 3        | 9        | 7        | Bacteria; Proteobacteria; Deltaproteobacteria; Myxococcales                                   |
| Otu647  | 23       | 8       | 7       | 13      | 12      | 13      | 6        | 4        | 12       | 8        | 10       | 7        | Bacteria; Proteobacteria; Deltaproteobacteria; Myxococcales                                   |
| Otu644  | 0        | 0       | 7       | 14      | 4       | 3       | 11       | 7        | 2        | 1        | 0        | 1        | Bacteria; Proteobacteria; Gammaproteobacteria; Legionellales; Coxiellaceae; Aquicella         |
| Otu645  | 10       | 11      | 6       | 16      | 15      | 9       | 18       | 16       | 16       | 32       | 16       | 19       | Bacteria; Proteobacteria; Deltaproteobacteria; Myxococcales                                   |

| #OTU ID | Z31DSO1r | Z31DSO2 | Z31DSO3 | Z31DSO4 | Z31DSO5 | Z31DSO6 | Z31JDSO1 | Z31JDSO2 | Z31JDSO3 | Z31JDSO4 | Z31JDSO5 | Z31JDSO6 | taxonomy                                                                                        |
|---------|----------|---------|---------|---------|---------|---------|----------|----------|----------|----------|----------|----------|-------------------------------------------------------------------------------------------------|
| Otu642  | 42       | 10      | 13      | 13      | 12      | 5       | 19       | 10       | 6        | 25       | 22       | 8        | Bacteria; Planctomycetes; Phycisphaerae; WD2101                                                 |
| Otu643  | 13       | 1       | 1       | 1       | 0       | 0       | 0        | 0        | 0        | 0        | 1        | 1        | Bacteria; Acidobacteria; Acidobacteria-6; CCU21                                                 |
| Otu640  | 39       | 10      | 21      | 10      | 6       | 5       | 25       | 3        | 17       | 11       | 7        | 11       | Bacteria; Proteobacteria; Alphaproteobacteria; Sphingomonadales; Sphingomonadaceae              |
| Otu641  | 9        | 5       | 9       | 19      | 3       | 3       | 15       | 19       | 15       | 10       | 13       | 17       | Bacteria; Gemmatimonadetes; Gemmatimonadetes; N1423WL                                           |
| Otu648  | 19       | 9       | 16      | 5       | 7       | 2       | 11       | 0        | 4        | 3        | 14       | 1        | Bacteria; Chloroflexi; Chloroflexi; Roseiflexales; Kouleothrixaceae                             |
| Otu649  | 18       | 2       | 0       | 0       | 0       | 0       | 0        | 0        | 0        | 0        | 0        | 0        | Bacteria; Gemmatimonadetes; Gemmatimonadetes; Gemmatimonadales; Gemmatimonadaceae; Gemmatimonas |
| Otu2681 | 0        | 1       | 2       | 0       | 2       | 0       | 1        | 0        | 0        | 0        | 3        | 1        | Bacteria; Actinobacteria; Actinobacteria; Actinomycetales; Nocardioideaceae                     |
| Otu2680 | 3        | 0       | 0       | 0       | 0       | 0       | 0        | 0        | 0        | 0        | 2        | 0        | Bacteria; Verrucomicrobia; Spartobacteria; Chthoniobacteriales; Chthoniobacteraceae; DA101      |
| Otu2683 | 0        | 1       | 1       | 2       | 0       | 3       | 1        | 2        | 3        | 3        | 0        | 1        | Bacteria; Bacteroidetes; At12OctB3                                                              |
| Otu2682 | 0        | 1       | 1       | 0       | 1       | 0       | 0        | 1        | 0        | 2        | 3        | 1        | Bacteria; Firmicutes; Clostridia; Clostridiales; Peptostreptococcaceae                          |
| Otu2685 | 3        | 0       | 1       | 5       | 6       | 1       | 0        | 0        | 2        | 1        | 6        | 7        | Bacteria; Proteobacteria; Betaproteobacteria; Rhodocyclales; Rhodocyclaceae                     |
| Otu2684 | 0        | 3       | 2       | 0       | 3       | 3       | 0        | 0        | 1        | 0        | 2        | 0        | Bacteria; Chloroflexi; Anaerolineae; GCA004                                                     |
| Otu2687 | 1        | 0       | 2       | 0       | 0       | 0       | 0        | 0        | 1        | 0        | 1        | 1        | Bacteria; Acidobacteria; TM1                                                                    |
| Otu2686 | 3        | 0       | 0       | 0       | 0       | 0       | 0        | 2        | 1        | 0        | 1        | 0        | Bacteria                                                                                        |
| Otu2689 | 4        | 1       | 1       | 4       | 1       | 6       | 1        | 4        | 2        | 4        | 2        | 0        | Bacteria; Elusimicrobia; Elusimicrobia; MVP-88                                                  |
| Otu2519 | 0        | 0       | 0       | 1       | 0       | 1       | 4        | 0        | 1        | 1        | 1        | 0        | Bacteria; Actinobacteria; Thermoleophilia; Gaiellales; Gaiellaceae                              |
| Otu2518 | 2        | 0       | 0       | 0       | 0       | 0       | 3        | 0        | 1        | 2        | 0        | 0        | Bacteria; TM7; SC3                                                                              |
| Otu1232 | 13       | 12      | 11      | 6       | 6       | 11      | 10       | 7        | 8        | 6        | 14       | 5        | Bacteria; Proteobacteria; Gammaproteobacteria; Xanthomonadales; Sinobacteraceae                 |
| Otu1819 | 1        | 0       | 1       | 3       | 0       | 3       | 4        | 5        | 6        | 3        | 2        | 3        | Bacteria; Proteobacteria; Deltaproteobacteria; Myxococcales                                     |
| Otu1818 | 10       | 8       | 1       | 0       | 1       | 1       | 0        | 0        | 1        | 1        | 1        | 0        | Bacteria; Acidobacteria; iii1-8; DS-18                                                          |
| Otu3259 | 1        | 2       | 0       | 0       | 0       | 0       | 0        | 0        | 0        | 0        | 1        | 0        | Bacteria; Chloroflexi; TK17; mle1-48                                                            |
| Otu3258 | 3        | 2       | 1       | 2       | 3       | 5       | 5        | 4        | 2        | 5        | 7        | 6        | Bacteria; Proteobacteria; Deltaproteobacteria; MIZ46                                            |

| #OTU ID | Z31DSO1r | Z31DSO2 | Z31DSO3 | Z31DSO4 | Z31DSO5 | Z31DSO6 | Z31J1DSO1 | Z31J1DSO2 | Z31J1DSO3 | Z31J1DSO4 | Z31J1DSO5 | Z31J1DSO6 | taxonomy                                                                                     |
|---------|----------|---------|---------|---------|---------|---------|-----------|-----------|-----------|-----------|-----------|-----------|----------------------------------------------------------------------------------------------|
| Otu3287 | 2        | 0       | 0       | 0       | 0       | 0       | 0         | 0         | 0         | 0         | 0         | 0         | Bacteria                                                                                     |
| Otu1811 | 9        | 0       | 3       | 3       | 4       | 2       | 2         | 1         | 1         | 2         | 2         | 2         | Bacteria; Planctomycetes; Phycisphaerae; WD2101                                              |
| Otu1810 | 2        | 1       | 0       | 1       | 4       | 1       | 0         | 0         | 0         | 0         | 4         | 0         | Bacteria; Proteobacteria; Deltaproteobacteria; Desulfuromonadales; Geobacteraceae; Geobacter |
| Otu1812 | 0        | 1       | 0       | 2       | 0       | 1       | 1         | 2         | 0         | 0         | 3         | 0         | Bacteria; Planctomycetes; Phycisphaerae; WD2101                                              |
| Otu1815 | 24       | 11      | 12      | 18      | 4       | 10      | 10        | 6         | 5         | 11        | 17        | 5         | Bacteria; Acidobacteria; Acidobacteriia; Acidobacteriales; Koribacteraceae                   |
| Otu1814 | 0        | 0       | 1       | 2       | 1       | 0       | 0         | 1         | 3         | 1         | 0         | 2         | Bacteria; Chloroflexi; Ktedonobacteria; JG30-KF-AS9                                          |
| Otu1816 | 0        | 0       | 0       | 1       | 1       | 1       | 0         | 0         | 0         | 3         | 3         | 1         | Bacteria; Cyanobacteria; Chloroplast; Chlorophyta; Chlamydomonadales                         |
| Otu2359 | 0        | 0       | 0       | 0       | 0       | 2       | 0         | 0         | 0         | 0         | 0         | 0         | Bacteria; Proteobacteria; Gammaproteobacteria; Legionellales; Coxiellaceae; Aquicella        |
| Otu2358 | 50       | 7       | 6       | 16      | 9       | 5       | 8         | 3         | 12        | 8         | 20        | 6         | Bacteria; Acidobacteria; iii1-8; DS-18                                                       |
| Otu2353 | 1        | 0       | 2       | 4       | 1       | 2       | 6         | 5         | 2         | 5         | 6         | 3         | Bacteria; Actinobacteria; Acidimicrobiia; Acidimicrobiales                                   |
| Otu2352 | 1        | 0       | 0       | 0       | 0       | 0       | 1         | 2         | 0         | 1         | 0         | 4         | Bacteria; Firmicutes; Bacilli; Bacillales                                                    |
| Otu2351 | 0        | 0       | 0       | 0       | 1       | 0       | 0         | 1         | 1         | 0         | 0         | 2         | Bacteria; Proteobacteria; Alphaproteobacteria; Rhodobacterales; Rhodobacteraceae; Paracoccus |
| Otu2350 | 1        | 2       | 2       | 2       | 0       | 0       | 1         | 0         | 0         | 1         | 2         | 1         | Bacteria; Proteobacteria; Gammaproteobacteria; Legionellales                                 |
| Otu2357 | 0        | 0       | 0       | 0       | 0       | 0       | 0         | 0         | 0         | 0         | 2         | 1         | Bacteria; Chloroflexi; Ktedonobacteria; Thermogemmatissporales; Thermogemmatissporaceae      |
| Otu2356 | 1        | 0       | 0       | 0       | 1       | 0       | 1         | 0         | 2         | 0         | 0         | 0         | Bacteria; Proteobacteria; Deltaproteobacteria; FAC87                                         |
| Otu2355 | 2        | 0       | 1       | 0       | 0       | 0       | 1         | 0         | 1         | 0         | 1         | 1         | Bacteria; Planctomycetes; Planctomycetia; Gemmatales; Gemmataceae                            |
| Otu2354 | 0        | 1       | 0       | 0       | 0       | 0       | 1         | 0         | 3         | 0         | 0         | 0         | Bacteria                                                                                     |
| Otu3281 | 2        | 0       | 0       | 0       | 0       | 0       | 0         | 0         | 0         | 0         | 0         | 0         | Bacteria; Actinobacteria; Actinobacteria                                                     |
| Otu2891 | 1        | 1       | 0       | 2       | 0       | 0       | 1         | 0         | 0         | 1         | 0         | 1         | Bacteria; Planctomycetes; Phycisphaerae; Phycisphaerales; Phycisphaeraeae                    |
| Otu3025 | 111      | 50      | 51      | 58      | 63      | 14      | 24        | 19        | 14        | 60        | 97        | 18        | Bacteria; Acidobacteria; Chloracidobacteria; RB41                                            |
| Otu2693 | 2        | 0       | 0       | 1       | 1       | 2       | 0         | 1         | 1         | 1         | 2         | 2         | Bacteria; Proteobacteria; Alphaproteobacteria; Rhodospirillales; Rhodospirillaceae           |
| Otu2230 | 2        | 0       | 1       | 2       | 1       | 0       | 3         | 0         | 1         | 0         | 1         | 2         | Bacteria; Planctomycetes; Phycisphaerae; WD2101                                              |

| #OTU ID | Z31DSO1r | Z31DSO2 | Z31DSO3 | Z31DSO4 | Z31DSO5 | Z31DSO6 | Z31JDSO1 | Z31JDSO2 | Z31JDSO3 | Z31JDSO4 | Z31JDSO5 | Z31JDSO6 | taxonomy                                                                                                                       |
|---------|----------|---------|---------|---------|---------|---------|----------|----------|----------|----------|----------|----------|--------------------------------------------------------------------------------------------------------------------------------|
| Otu2231 | 4        | 0       | 4       | 0       | 3       | 0       | 0        | 0        | 1        | 1        | 0        | 0        | Bacteria; Gemmatimonadetes; Gemmatimonadetes; Gemmatimonadales                                                                 |
| Otu2232 | 0        | 0       | 0       | 1       | 1       | 0       | 0        | 1        | 0        | 0        | 3        | 1        | Bacteria; Planctomycetes; Planctomycetia; Gemmatales; Gemmataceae                                                              |
| Otu2233 | 3        | 1       | 2       | 1       | 0       | 3       | 0        | 0        | 1        | 0        | 2        | 0        | Bacteria; Proteobacteria; Alphaproteobacteria; Rickettsiales; mitochondria; Acanthamoeba; Acanthamoeba_polyphaga               |
| Otu2234 | 4        | 1       | 2       | 2       | 0       | 1       | 2        | 1        | 3        | 0        | 3        | 0        | Bacteria; Acidobacteria; Solibacteres; Solibacterales; AKIW659                                                                 |
| Otu2235 | 1        | 0       | 1       | 1       | 0       | 2       | 1        | 2        | 1        | 0        | 3        | 1        | Bacteria; Chlamydiae; Chlamydia; Chlamydiales; Parachlamydiaceae                                                               |
| Otu2236 | 4        | 3       | 2       | 2       | 1       | 0       | 4        | 0        | 1        | 1        | 1        | 0        | Bacteria; Chloroflexi; Anaerolineae; WCHB1-50                                                                                  |
| Otu2237 | 5        | 0       | 0       | 3       | 0       | 0       | 0        | 1        | 0        | 1        | 2        | 2        | Bacteria; Proteobacteria; Deltaproteobacteria; Myxococcales                                                                    |
| Otu2238 | 2        | 2       | 0       | 4       | 1       | 0       | 3        | 2        | 4        | 0        | 2        | 1        | Bacteria; Proteobacteria; Gammaproteobacteria; Legionellales                                                                   |
| Otu2239 | 0        | 1       | 1       | 3       | 0       | 0       | 0        | 2        | 4        | 0        | 0        | 0        | Bacteria; Proteobacteria; Gammaproteobacteria; Legionellales                                                                   |
| Otu3329 | 2        | 0       | 0       | 0       | 0       | 0       | 0        | 0        | 0        | 0        | 0        | 0        | Bacteria; TM7; TM7-1                                                                                                           |
| Otu3328 | 0        | 3       | 3       | 0       | 1       | 0       | 1        | 0        | 0        | 0        | 2        | 1        | Bacteria; Chloroflexi; Anaerolineae                                                                                            |
| Otu3321 | 3        | 0       | 0       | 0       | 0       | 0       | 0        | 0        | 0        | 0        | 0        | 0        | Bacteria; Proteobacteria; Alphaproteobacteria; Rhodospirillales; Rhodospirillaceae; Magnetospirillum                           |
| Otu3320 | 1        | 1       | 0       | 2       | 2       | 1       | 0        | 1        | 0        | 0        | 2        | 2        | Bacteria; Proteobacteria; Gammaproteobacteria; Legionellales                                                                   |
| Otu3323 | 0        | 0       | 0       | 0       | 0       | 0       | 2        | 0        | 1        | 0        | 0        | 1        | Bacteria; Bacteroidetes; Cytophagia; Cytophagales; Cytophagaceae; Sporocytophaga                                               |
| Otu3322 | 0        | 0       | 0       | 3       | 0       | 0       | 0        | 0        | 0        | 0        | 0        | 0        | Bacteria; Actinobacteria; Thermoleophilia; Gaiellales; Gaiellaceae                                                             |
| Otu3325 | 0        | 0       | 0       | 0       | 1       | 1       | 1        | 2        | 1        | 0        | 0        | 0        | Bacteria; Proteobacteria; Deltaproteobacteria; Bdellovibrionales; Bdellovibrionaceae; Bdellovibrio; Bdellovibrio_bacteriovorus |
| Otu3324 | 0        | 3       | 0       | 1       | 0       | 0       | 0        | 0        | 0        | 2        | 1        | 0        | Bacteria; Bacteroidetes; Saprospirae; Saprospirales; Chitinophagaceae                                                          |
| Otu3327 | 0        | 0       | 0       | 0       | 0       | 0       | 0        | 0        | 0        | 2        | 0        | 0        | Bacteria; Proteobacteria; Alphaproteobacteria; Rickettsiales; Rickettsiaceae                                                   |
| Otu3326 | 2        | 1       | 3       | 0       | 0       | 2       | 1        | 3        | 0        | 2        | 0        | 2        | Bacteria; Planctomycetes; Phycisphaerae; CPLa-3                                                                                |
| Otu1671 | 2        | 0       | 5       | 3       | 1       | 1       | 2        | 0        | 0        | 0        | 2        | 0        | Bacteria; Chloroflexi; Chloroflexi; Chloroflexales                                                                             |
| Otu1670 | 14       | 4       | 3       | 4       | 6       | 0       | 3        | 3        | 1        | 5        | 19       | 0        | Bacteria; Acidobacteria; Solibacteres; Solibacterales                                                                          |
| Otu1673 | 0        | 6       | 3       | 0       | 2       | 2       | 0        | 0        | 0        | 1        | 0        | 0        | Bacteria; Chloroflexi; Anaerolineae; SBR1031; A4b                                                                              |

| #OTU ID | Z31DSO1r | Z31DSO2 | Z31DSO3 | Z31DSO4 | Z31DSO5 | Z31DSO6 | Z31J1DSO1 | Z31J1DSO2 | Z31J1DSO3 | Z31J1DSO4 | Z31J1DSO5 | Z31J1DSO6 | taxonomy                                                                                     |
|---------|----------|---------|---------|---------|---------|---------|-----------|-----------|-----------|-----------|-----------|-----------|----------------------------------------------------------------------------------------------|
| Otu1672 | 2        | 0       | 0       | 4       | 0       | 1       | 4         | 0         | 1         | 2         | 5         | 1         | Bacteria; Chloroflexi; TK17; mle1-48                                                         |
| Otu1675 | 1        | 0       | 2       | 1       | 0       | 2       | 7         | 3         | 3         | 3         | 2         | 1         | Bacteria; Verrucomicrobia; Pedosphaerae; Pedosphaerales                                      |
| Otu1674 | 2        | 1       | 3       | 3       | 0       | 9       | 2         | 3         | 1         | 3         | 0         | 1         | Bacteria; Verrucomicrobia; Spartobacteria; Chthoniobacteriales; Chthoniobacteraceae          |
| Otu1677 | 0        | 0       | 1       | 1       | 0       | 2       | 1         | 0         | 1         | 5         | 1         | 2         | Bacteria; Verrucomicrobia                                                                    |
| Otu1676 | 9        | 1       | 4       | 7       | 3       | 2       | 8         | 4         | 2         | 2         | 5         | 3         | Bacteria; Proteobacteria; Alphaproteobacteria; Rhodospirillales; Rhodospirillaceae           |
| Otu1679 | 4        | 0       | 1       | 0       | 0       | 0       | 1         | 2         | 1         | 1         | 0         | 0         | Bacteria; Elusimicrobia; Elusimicrobia; FAC88                                                |
| Otu1678 | 2        | 0       | 0       | 4       | 0       | 0       | 0         | 0         | 0         | 0         | 0         | 0         | Bacteria; Tenericutes; Mollicutes; Entomoplasmatales                                         |
| Otu2126 | 0        | 1       | 5       | 15      | 6       | 6       | 6         | 2         | 11        | 11        | 17        | 0         | Bacteria; Proteobacteria; Gammaproteobacteria                                                |
| Otu2127 | 1        | 0       | 0       | 1       | 0       | 0       | 0         | 3         | 1         | 0         | 0         | 0         | Bacteria; Gemmatimonadetes; Gemmatimonadetes; Ellin5290                                      |
| Otu2120 | 0        | 0       | 0       | 0       | 0       | 0       | 0         | 1         | 3         | 0         | 0         | 1         | Bacteria; Proteobacteria; Deltaproteobacteria                                                |
| Otu2121 | 0        | 0       | 0       | 4       | 0       | 0       | 1         | 3         | 0         | 0         | 1         | 1         | Bacteria; Planctomycetes; Planctomycetia; Gemmatales; Gemmataceae                            |
| Otu2122 | 62       | 22      | 41      | 51      | 47      | 7       | 31        | 14        | 22        | 71        | 74        | 15        | Bacteria; Acidobacteria; Chloracidobacteria; 11-24                                           |
| Otu2123 | 1        | 0       | 0       | 1       | 1       | 0       | 3         | 2         | 0         | 0         | 3         | 3         | Bacteria; Armatimonadetes; Fimbriimonadia; Fimbriimonadales; Fimbriimonadaceae; Fimbriimonas |
| Otu1803 | 4        | 2       | 0       | 0       | 1       | 0       | 0         | 0         | 0         | 0         | 2         | 0         | Bacteria; Planctomycetes; Planctomycetia; Planctomycetales; Planctomycetaceae; Planctomyces  |
| Otu1634 | 1        | 4       | 1       | 7       | 3       | 0       | 0         | 0         | 1         | 0         | 1         | 1         | Bacteria; Acidobacteria; Holophagae; Holophagales; Holophagaceae                             |
| Otu1186 | 20       | 2       | 3       | 3       | 2       | 2       | 9         | 2         | 3         | 6         | 8         | 1         | Bacteria; Chlorobi                                                                           |
| Otu3168 | 2        | 1       | 0       | 0       | 0       | 0       | 0         | 0         | 1         | 0         | 2         | 1         | Bacteria; Bacteroidetes; Sphingobacteriia; Sphingobacteriales                                |
| Otu2908 | 2        | 0       | 0       | 0       | 0       | 0       | 0         | 0         | 0         | 0         | 0         | 0         | Bacteria; Actinobacteria; Acidimicrobiia; Acidimicrobiales; C111                             |
| Otu2909 | 3        | 0       | 0       | 0       | 0       | 0       | 0         | 0         | 0         | 0         | 0         | 0         | Bacteria; Proteobacteria; Alphaproteobacteria; Rhodospirillales; Rhodospirillaceae           |
| Otu2906 | 0        | 0       | 0       | 1       | 0       | 0       | 0         | 2         | 0         | 0         | 0         | 0         | Bacteria; Proteobacteria; Gammaproteobacteria; Legionellales; Coxiellaceae                   |
| Otu2907 | 0        | 0       | 0       | 0       | 0       | 2       | 0         | 0         | 0         | 0         | 0         | 0         | Bacteria; Verrucomicrobia; Methylacidiphilae; Methylacidiphilales                            |
| Otu2904 | 0        | 1       | 1       | 0       | 0       | 1       | 0         | 2         | 0         | 3         | 1         | 1         | Bacteria; Acidobacteria; Acidobacteria-5                                                     |

| #OTU ID | Z31DSO1r | Z31DSO2 | Z31DSO3 | Z31DSO4 | Z31DSO5 | Z31DSO6 | Z31J1DSO1 | Z31J1DSO2 | Z31J1DSO3 | Z31J1DSO4 | Z31J1DSO5 | Z31J1DSO6 | taxonomy                                                                                |
|---------|----------|---------|---------|---------|---------|---------|-----------|-----------|-----------|-----------|-----------|-----------|-----------------------------------------------------------------------------------------|
| Otu2905 | 2        | 0       | 0       | 1       | 0       | 0       | 0         | 0         | 0         | 0         | 0         | 1         | Bacteria; Proteobacteria; Deltaproteobacteria; MIZ46                                    |
| Otu2902 | 2        | 3       | 2       | 0       | 5       | 1       | 1         | 4         | 1         | 4         | 3         | 4         | Bacteria; Chlamydiae; Chlamydiia; Chlamydiales                                          |
| Otu2903 | 0        | 0       | 2       | 0       | 0       | 0       | 0         | 0         | 0         | 3         | 0         | 0         | Bacteria; Verrucomicrobia; Opitutae; Opitutales; Opitutaceae; Opitutus                  |
| Otu2900 | 1        | 2       | 1       | 3       | 0       | 0       | 2         | 1         | 1         | 1         | 2         | 0         | Bacteria; Actinobacteria; Acidimicrobiia; Acidimicrobiales                              |
| Otu2901 | 2        | 0       | 0       | 0       | 0       | 0       | 0         | 0         | 0         | 0         | 0         | 0         | Bacteria; TM7; TM7-1                                                                    |
| Otu1240 | 4        | 1       | 2       | 3       | 0       | 0       | 7         | 4         | 0         | 2         | 1         | 0         | Bacteria; Chlamydiae; Chlamydiia; Chlamydiales                                          |
| Otu1241 | 0        | 1       | 2       | 5       | 0       | 1       | 3         | 3         | 5         | 1         | 2         | 1         | Bacteria; TM6; SJA-4                                                                    |
| Otu1242 | 0        | 1       | 7       | 3       | 4       | 2       | 6         | 2         | 2         | 2         | 7         | 1         | Bacteria; Proteobacteria                                                                |
| Otu1243 | 9        | 1       | 1       | 3       | 2       | 3       | 1         | 0         | 0         | 3         | 3         | 1         | Bacteria; Elusimicrobia; Elusimicrobia; I1b                                             |
| Otu1244 | 20       | 35      | 34      | 7       | 22      | 4       | 1         | 0         | 4         | 9         | 24        | 0         | Bacteria; Bacteroidetes; Saprospirae; Saprospirales; Chitinophagaceae                   |
| Otu1245 | 0        | 3       | 2       | 2       | 0       | 4       | 9         | 0         | 1         | 6         | 2         | 1         | Bacteria; Firmicutes; Bacilli; Bacillales                                               |
| Otu1246 | 0        | 5       | 1       | 0       | 0       | 0       | 0         | 0         | 0         | 0         | 2         | 0         | Bacteria; Chloroflexi; Anaerolineae; GCA004                                             |
| Otu1247 | 2        | 1       | 3       | 4       | 1       | 0       | 4         | 5         | 6         | 0         | 1         | 2         | Bacteria; Proteobacteria; Alphaproteobacteria; Rhodospirillales; Acetobacteraceae       |
| Otu1248 | 0        | 2       | 1       | 0       | 3       | 0       | 2         | 1         | 1         | 0         | 6         | 1         | Bacteria; Firmicutes; Clostridia; Clostridiales; Peptostreptococcaceae; Tepidibacter    |
| Otu1249 | 1        | 0       | 2       | 3       | 1       | 5       | 6         | 7         | 3         | 2         | 5         | 6         | Bacteria; Proteobacteria; Alphaproteobacteria; Rhodospirillales; Acetobacteraceae       |
| Otu1809 | 3        | 0       | 2       | 3       | 1       | 2       | 1         | 4         | 3         | 4         | 1         | 2         | Bacteria; Proteobacteria; Alphaproteobacteria                                           |
| Otu1482 | 2        | 2       | 2       | 2       | 1       | 2       | 5         | 1         | 2         | 3         | 2         | 1         | Bacteria; Bacteroidetes; Saprospirae; Saprospirales; Chitinophagaceae                   |
| Otu1483 | 1        | 1       | 0       | 4       | 1       | 0       | 0         | 0         | 0         | 0         | 3         | 0         | Bacteria; Proteobacteria                                                                |
| Otu1480 | 1        | 5       | 2       | 0       | 2       | 3       | 3         | 5         | 5         | 3         | 3         | 6         | Bacteria; Actinobacteria; Actinobacteria; Actinomycetales; Sporichthyaceae; Sporichthya |
| Otu1481 | 1        | 0       | 1       | 3       | 1       | 2       | 9         | 6         | 4         | 2         | 4         | 3         | Bacteria                                                                                |
| Otu1486 | 0        | 0       | 4       | 3       | 0       | 14      | 1         | 11        | 4         | 2         | 3         | 0         | Bacteria; Chloroflexi; Ktedonobacteria; Ktedonobacteriales; Ktedonobacteraceae          |
| Otu1487 | 7        | 3       | 8       | 12      | 4       | 19      | 7         | 21        | 21        | 8         | 5         | 3         | Bacteria; Elusimicrobia; Elusimicrobia; FAC88                                           |

| #OTU ID | Z31DSO1r | Z31DSO2 | Z31DSO3 | Z31DSO4 | Z31DSO5 | Z31DSO6 | Z31JDSO1 | Z31JDSO2 | Z31JDSO3 | Z31JDSO4 | Z31JDSO5 | Z31JDSO6 | taxonomy                                                                                                          |
|---------|----------|---------|---------|---------|---------|---------|----------|----------|----------|----------|----------|----------|-------------------------------------------------------------------------------------------------------------------|
| Otu1484 | 2        | 1       | 2       | 0       | 0       | 0       | 1        | 1        | 0        | 1        | 4        | 2        | Bacteria; Proteobacteria; Deltaproteobacteria; Bdellovibrionales; Bdellovibrionaceae; Bdellovibrio                |
| Otu1485 | 150      | 41      | 56      | 70      | 37      | 95      | 81       | 73       | 124      | 71       | 63       | 66       | Bacteria; Acidobacteria; Solibacteres; Solibacterales; Solibacteraceae; Candidatus_Solibacter                     |
| Otu1488 | 7        | 1       | 2       | 17      | 4       | 0       | 6        | 2        | 2        | 9        | 3        | 4        | Bacteria; Bacteroidetes; Sphingobacteriia; Sphingobacteriales                                                     |
| Otu1489 | 2        | 7       | 4       | 1       | 1       | 0       | 0        | 0        | 0        | 0        | 2        | 0        | Bacteria; Verrucomicrobia; Pedosphaerae; Pedosphaerales; auto67_4W                                                |
| Otu3121 | 0        | 3       | 1       | 1       | 0       | 0       | 0        | 0        | 0        | 1        | 0        | 0        | Bacteria; Proteobacteria; Gammaproteobacteria; Legionellales                                                      |
| Otu3120 | 0        | 0       | 2       | 0       | 0       | 1       | 2        | 2        | 1        | 0        | 0        | 0        | Bacteria; Proteobacteria; Deltaproteobacteria; Bdellovibrionales; Bdellovibrionaceae; Bdellovibrio                |
| Otu2006 | 0        | 3       | 2       | 0       | 0       | 0       | 0        | 0        | 0        | 4        | 1        | 2        | Bacteria; Verrucomicrobia; Pedosphaerae; Pedosphaerales                                                           |
| Otu3127 | 0        | 0       | 0       | 0       | 0       | 0       | 2        | 1        | 2        | 2        | 0        | 0        | Bacteria; Proteobacteria; Alphaproteobacteria; Rickettsiales                                                      |
| Otu3126 | 0        | 0       | 0       | 0       | 0       | 0       | 0        | 0        | 0        | 0        | 0        | 2        | Bacteria; Proteobacteria; Betaproteobacteria                                                                      |
| Otu3413 | 0        | 0       | 1       | 1       | 0       | 2       | 2        | 0        | 0        | 0        | 4        | 0        | Bacteria                                                                                                          |
| Otu3412 | 0        | 0       | 0       | 0       | 0       | 0       | 0        | 0        | 0        | 1        | 2        | 0        | Bacteria                                                                                                          |
| Otu3411 | 0        | 0       | 0       | 1       | 0       | 0       | 1        | 0        | 2        | 0        | 0        | 0        | Bacteria; Proteobacteria; Gammaproteobacteria; Legionellales; Coxiellaceae; Aquicella                             |
| Otu3410 | 0        | 0       | 0       | 0       | 0       | 0       | 0        | 0        | 2        | 0        | 0        | 0        | Bacteria; Proteobacteria; Alphaproteobacteria; Rhodospirillales; Rhodospirillaceae                                |
| Otu3417 | 0        | 0       | 1       | 0       | 0       | 0       | 2        | 0        | 0        | 0        | 0        | 1        | Bacteria; Proteobacteria                                                                                          |
| Otu3125 | 2        | 0       | 0       | 0       | 0       | 0       | 0        | 0        | 0        | 0        | 0        | 0        | Bacteria; Verrucomicrobia; Spartobacteria; Chthoniobacteriales; Chthoniobacteraceae; Candidatus_Xiphinematobacter |
| Otu3415 | 0        | 0       | 0       | 0       | 0       | 0       | 1        | 1        | 0        | 2        | 0        | 1        | Bacteria; Proteobacteria; Gammaproteobacteria; Legionellales; Coxiellaceae                                        |
| Otu3414 | 2        | 0       | 1       | 1       | 0       | 0       | 0        | 0        | 0        | 0        | 0        | 0        | Bacteria; Proteobacteria; Gammaproteobacteria; Legionellales                                                      |
| Otu2003 | 2        | 1       | 1       | 4       | 2       | 0       | 5        | 1        | 2        | 0        | 2        | 1        | Bacteria; Proteobacteria; Deltaproteobacteria; Myxococcales; Polyangiaceae                                        |
| Otu3419 | 1        | 0       | 2       | 3       | 2       | 1       | 1        | 2        | 3        | 0        | 1        | 2        | Bacteria; Proteobacteria; Deltaproteobacteria; Myxococcales                                                       |
| Otu3124 | 1        | 1       | 0       | 0       | 4       | 1       | 1        | 0        | 0        | 0        | 3        | 0        | Bacteria; Elusimicrobia; Elusimicrobia; FAC88                                                                     |
| Otu2711 | 2        | 1       | 1       | 1       | 3       | 0       | 0        | 1        | 1        | 0        | 2        | 1        | Bacteria; Planctomycetes; Planctomycetia; Gemmatales; Gemmataceae                                                 |
| Otu2002 | 0        | 4       | 4       | 1       | 2       | 1       | 1        | 0        | 0        | 2        | 0        | 2        | Bacteria; Verrucomicrobia; Spartobacteria; Chthoniobacteriales; Chthoniobacteraceae; OR-59                        |



| #OTU ID | Z31DSO1r | Z31DSO2 | Z31DSO3 | Z31DSO4 | Z31DSO5 | Z31DSO6 | Z31JDSO1 | Z31JDSO2 | Z31JDSO3 | Z31JDSO4 | Z31JDSO5 | Z31JDSO6 | taxonomy                                                                                         |
|---------|----------|---------|---------|---------|---------|---------|----------|----------|----------|----------|----------|----------|--------------------------------------------------------------------------------------------------|
| Otu2710 | 0        | 0       | 1       | 0       | 0       | 0       | 1        | 0        | 0        | 3        | 0        | 3        | Bacteria; Chlamydiae; Chlamydia; Chlamydiales                                                    |
| Otu2000 | 3        | 0       | 0       | 1       | 0       | 0       | 0        | 1        | 0        | 0        | 6        | 0        | Bacteria; Chloroflexi; Anaerolineae; SJA-15                                                      |
| Otu3354 | 0        | 2       | 2       | 1       | 1       | 0       | 0        | 0        | 1        | 0        | 1        | 0        | Bacteria; Bacteroidetes; Sphingobacteria; Sphingobacteriales                                     |
| Otu2008 | 10       | 5       | 8       | 7       | 5       | 2       | 7        | 1        | 1        | 6        | 2        | 0        | Bacteria; Verrucomicrobia; Spartobacteria; Chthoniobacteriales; Chthoniobacteraceae              |
| Otu2619 | 3        | 2       | 2       | 0       | 2       | 3       | 3        | 0        | 1        | 0        | 3        | 1        | Bacteria; Actinobacteria; Thermoleophilia; Gaiellales                                            |
| Otu83   | 286      | 83      | 86      | 114     | 45      | 89      | 118      | 86       | 99       | 82       | 68       | 122      | Bacteria; Proteobacteria; Alphaproteobacteria; Ellin329                                          |
| Otu82   | 196      | 77      | 82      | 94      | 79      | 29      | 132      | 56       | 62       | 102      | 107      | 135      | Bacteria; Acidobacteria; Acidobacteria; Acidobacteriales; Koribacteraceae; Candidatus_Koribacter |
| Otu81   | 131      | 28      | 26      | 39      | 10      | 8       | 23       | 5        | 9        | 12       | 15       | 4        | Bacteria; Bacteroidetes; Saprospirae; Saprospirales; Chitinophagaceae                            |
| Otu80   | 52       | 26      | 14      | 16      | 7       | 5       | 6        | 69       | 4        | 6        | 32       | 142      | Bacteria; Bacteroidetes; Flavobacteria; Flavobacteriales; Flavobacteriaceae; Flavobacterium      |
| Otu87   | 22       | 11      | 14      | 65      | 17      | 33      | 34       | 28       | 25       | 175      | 54       | 25       | Bacteria; Bacteroidetes; Saprospirae; Saprospirales; Chitinophagaceae; Flavisolibacter           |
| Otu86   | 165      | 31      | 83      | 125     | 51      | 175     | 111      | 125      | 102      | 261      | 129      | 130      | Bacteria; Acidobacteria; Acidobacteria; Acidobacteriales; Koribacteraceae; Candidatus_Koribacter |
| Otu85   | 97       | 37      | 78      | 134     | 43      | 75      | 125      | 137      | 141      | 106      | 144      | 113      | Bacteria; Acidobacteria; Acidobacteria; Acidobacteriales; Koribacteraceae                        |
| Otu84   | 1        | 0       | 124     | 20      | 0       | 25      | 0        | 5        | 3        | 2        | 2        | 2        | Bacteria; Bacteroidetes; Saprospirae; Saprospirales; Chitinophagaceae; Chitinophaga              |
| Otu89   | 81       | 70      | 58      | 146     | 52      | 108     | 126      | 109      | 136      | 126      | 71       | 142      | Bacteria; Verrucomicrobia; Pedosphaerae; Pedosphaerales                                          |
| Otu88   | 95       | 46      | 65      | 125     | 36      | 24      | 126      | 114      | 102      | 142      | 125      | 107      | Bacteria; Gemmatimonadetes; Gemmatimonadetes; Gemmatimonadales                                   |
| Otu2719 | 0        | 0       | 1       | 0       | 1       | 3       | 1        | 0        | 0        | 0        | 0        | 0        | Bacteria; Actinobacteria; Actinobacteria; Actinomycetales; Nakamurellaceae                       |
| Otu975  | 18       | 2       | 6       | 2       | 2       | 3       | 2        | 4        | 3        | 1        | 4        | 3        | Bacteria; Proteobacteria; Deltaproteobacteria; Myxococcales                                      |
| Otu595  | 0        | 0       | 4       | 6       | 1       | 1       | 6        | 3        | 3        | 17       | 2        | 2        | Bacteria; Bacteroidetes; Saprospirae; Saprospirales; Chitinophagaceae                            |
| Otu501  | 0        | 0       | 0       | 8       | 18      | 2       | 2        | 3        | 18       | 5        | 4        | 2        | Bacteria; Proteobacteria; Gammaproteobacteria; Legionellales; Coxiellaceae; Aquicella            |
| Otu500  | 8        | 1       | 3       | 36      | 8       | 4       | 4        | 2        | 2        | 11       | 25       | 2        | Bacteria; Bacteroidetes; Cytophagia; Cytophagales; Cytophagaceae                                 |
| Otu503  | 22       | 21      | 18      | 2       | 18      | 1       | 5        | 0        | 4        | 6        | 13       | 2        | Bacteria; Bacteroidetes; Saprospirae; Saprospirales; Chitinophagaceae                            |
| Otu502  | 8        | 0       | 4       | 19      | 0       | 7       | 20       | 6        | 17       | 4        | 15       | 7        | Bacteria; Acidobacteria; Sva0725; Sva0725                                                        |

| #OTU ID | Z31DSO1r | Z31DSO2 | Z31DSO3 | Z31DSO4 | Z31DSO5 | Z31DSO6 | Z31JDSO1 | Z31JDSO2 | Z31JDSO3 | Z31JDSO4 | Z31JDSO5 | Z31JDSO6 | taxonomy                                                                                            |
|---------|----------|---------|---------|---------|---------|---------|----------|----------|----------|----------|----------|----------|-----------------------------------------------------------------------------------------------------|
| Otu504  | 5        | 9       | 8       | 6       | 3       | 5       | 17       | 8        | 22       | 7        | 7        | 10       | Bacteria; Gemmatimonadetes; Gemmatimonadetes; Ellin5290                                             |
| Otu507  | 23       | 4       | 16      | 16      | 4       | 13      | 29       | 29       | 24       | 19       | 11       | 15       | Bacteria; Acidobacteria; DA052; Ellin6513                                                           |
| Otu506  | 4        | 4       | 6       | 12      | 4       | 43      | 25       | 7        | 19       | 22       | 16       | 26       | Bacteria; Actinobacteria; Actinobacteria; Actinomycetales                                           |
| Otu509  | 0        | 17      | 11      | 20      | 18      | 9       | 15       | 17       | 14       | 15       | 22       | 12       | Bacteria; Proteobacteria; Gammaproteobacteria; Oceanospirillales; Halomonadaceae; Halomonas         |
| Otu508  | 1        | 1       | 8       | 9       | 1       | 21      | 2        | 6        | 17       | 4        | 10       | 1        | Bacteria; Chloroflexi; Ktedonobacteria                                                              |
| Otu1068 | 1        | 0       | 5       | 0       | 0       | 3       | 5        | 7        | 1        | 2        | 0        | 4        | Bacteria; Proteobacteria; Gammaproteobacteria; Xanthomonadales; Sinobacteraceae                     |
| Otu1069 | 2        | 0       | 0       | 8       | 0       | 0       | 0        | 1        | 0        | 0        | 7        | 0        | Bacteria; Bacteroidetes; Cytophagia; Cytophagales; Cytophagaceae                                    |
| Otu1060 | 5        | 2       | 8       | 7       | 4       | 0       | 3        | 4        | 2        | 3        | 3        | 0        | Bacteria; Armatimonadetes; Armatimonadia; Armatimonadales; Armatimonadaceae                         |
| Otu1061 | 0        | 1       | 2       | 5       | 5       | 3       | 3        | 1        | 1        | 7        | 3        | 0        | Bacteria; Proteobacteria; Gammaproteobacteria; Legionellales; Coxiellaceae; Aquicella               |
| Otu1062 | 0        | 1       | 9       | 1       | 2       | 2       | 0        | 0        | 5        | 0        | 0        | 0        | Bacteria; Bacteroidetes; Sphingobacteria; Sphingobacteriales                                        |
| Otu1063 | 9        | 1       | 3       | 6       | 1       | 1       | 3        | 3        | 2        | 1        | 7        | 3        | Bacteria; Proteobacteria; Alphaproteobacteria; Caulobacteriales; Caulobacteraceae; Phenylobacterium |
| Otu1064 | 1        | 4       | 1       | 4       | 1       | 8       | 0        | 0        | 4        | 1        | 3        | 0        | Bacteria; WS3; PRR-12; Sediment-1                                                                   |
| Otu1065 | 2        | 0       | 2       | 1       | 4       | 1       | 2        | 0        | 5        | 1        | 7        | 1        | Bacteria                                                                                            |
| Otu1066 | 0        | 8       | 2       | 0       | 0       | 1       | 0        | 0        | 0        | 0        | 0        | 0        | Bacteria; Acidobacteria                                                                             |
| Otu1067 | 7        | 0       | 0       | 2       | 0       | 2       | 1        | 2        | 1        | 4        | 2        | 2        | Bacteria; OD1; ABY1                                                                                 |
| Otu729  | 13       | 2       | 9       | 17      | 6       | 5       | 14       | 3        | 10       | 10       | 18       | 8        | Bacteria; Chloroflexi; TK10; B07_WMSP1; FFCH4570                                                    |
| Otu728  | 1        | 5       | 3       | 14      | 6       | 7       | 0        | 1        | 0        | 0        | 0        | 0        | Bacteria; Verrucomicrobia; Verrucomicrobiae; Verrucomicrobiales; Verrucomicrobiaceae; Luteolibacter |
| Otu721  | 28       | 12      | 17      | 13      | 8       | 12      | 21       | 13       | 11       | 12       | 26       | 14       | Bacteria; Chloroflexi; TK10; B07_WMSP1                                                              |
| Otu720  | 4        | 0       | 4       | 10      | 2       | 13      | 11       | 13       | 10       | 5        | 2        | 10       | Bacteria; Gemmatimonadetes; Gemmatimonadetes; Ellin5290                                             |
| Otu723  | 11       | 2       | 5       | 3       | 1       | 10      | 12       | 3        | 22       | 17       | 11       | 9        | Bacteria; Acidobacteria; Solibacteres; Solibacteriales                                              |
| Otu722  | 3        | 2       | 1       | 2       | 1       | 1       | 9        | 14       | 5        | 1        | 0        | 1        | Bacteria; Proteobacteria; Alphaproteobacteria; Ellin329                                             |
| Otu725  | 31       | 62      | 7       | 14      | 8       | 3       | 12       | 1        | 1        | 8        | 12       | 8        | Bacteria; Acidobacteria; Chloracidobacteria; RB41                                                   |

| #OTU ID | Z31DSO1r | Z31DSO2 | Z31DSO3 | Z31DSO4 | Z31DSO5 | Z31DSO6 | Z31J1DSO1 | Z31J1DSO2 | Z31J1DSO3 | Z31J1DSO4 | Z31J1DSO5 | Z31J1DSO6 | taxonomy                                                                                              |
|---------|----------|---------|---------|---------|---------|---------|-----------|-----------|-----------|-----------|-----------|-----------|-------------------------------------------------------------------------------------------------------|
| Otu724  | 26       | 13      | 23      | 26      | 8       | 14      | 15        | 6         | 14        | 9         | 24        | 7         | Bacteria; Chloroflexi; Ellin6529                                                                      |
| Otu727  | 7        | 7       | 9       | 13      | 2       | 11      | 12        | 3         | 6         | 4         | 4         | 1         | Bacteria; Chloroflexi; Chloroflexi; Roseiflexales; Kouleothrixaceae                                   |
| Otu726  | 8        | 3       | 3       | 4       | 6       | 11      | 4         | 4         | 2         | 17        | 13        | 6         | Bacteria; Chloroflexi; Ktedonobacteria; JG30-KF-AS9                                                   |
| Otu1114 | 1        | 0       | 0       | 7       | 6       | 3       | 3         | 2         | 0         | 0         | 7         | 0         | Bacteria; Cyanobacteria; Chloroplast; Stramenopiles                                                   |
| Otu1115 | 0        | 0       | 2       | 7       | 4       | 4       | 3         | 5         | 4         | 8         | 4         | 3         | Bacteria; Proteobacteria; Gammaproteobacteria; Legionellales; Coxiellaceae; Aquicella                 |
| Otu1116 | 1        | 7       | 0       | 0       | 1       | 0       | 1         | 3         | 0         | 0         | 0         | 3         | Bacteria; Bacteroidetes; Sphingobacteria; Sphingobacteriales                                          |
| Otu1117 | 3        | 1       | 2       | 5       | 1       | 2       | 8         | 0         | 0         | 10        | 8         | 5         | Bacteria; Firmicutes; Bacilli; Bacillales; Alicyclobacillaceae; Alicyclobacillus                      |
| Otu1110 | 2        | 0       | 1       | 2       | 0       | 9       | 1         | 0         | 2         | 0         | 0         | 2         | Bacteria; Proteobacteria; Gammaproteobacteria; Xanthomonadales; Sinobacteraceae                       |
| Otu1111 | 2        | 5       | 2       | 13      | 3       | 2       | 3         | 6         | 12        | 8         | 5         | 6         | Bacteria; Bacteroidetes; Sphingobacteria; Sphingobacteriales                                          |
| Otu1112 | 11       | 5       | 5       | 9       | 6       | 5       | 10        | 6         | 2         | 5         | 11        | 2         | Bacteria; Planctomycetes; Planctomycetia; Gemmatales; Gemmataceae; Gemmata                            |
| Otu1113 | 17       | 3       | 3       | 1       | 2       | 3       | 12        | 2         | 2         | 2         | 5         | 4         | Bacteria; Gemmatimonadetes; Gemmatimonadetes; Ellin5290                                               |
| Otu435  | 36       | 36      | 17      | 15      | 10      | 18      | 32        | 28        | 31        | 21        | 16        | 18        | Bacteria; Proteobacteria; Alphaproteobacteria; Rhodospirillales; Rhodospirillaceae                    |
| Otu434  | 3        | 6       | 2       | 22      | 3       | 5       | 14        | 6         | 25        | 14        | 6         | 12        | Bacteria; Gemmatimonadetes; Gemmatimonadetes                                                          |
| Otu437  | 30       | 18      | 11      | 9       | 7       | 2       | 4         | 2         | 2         | 6         | 19        | 7         | Bacteria; Proteobacteria; Betaproteobacteria; A21b; EB1003                                            |
| Otu436  | 46       | 34      | 11      | 17      | 21      | 5       | 12        | 15        | 9         | 12        | 19        | 8         | Bacteria; Acidobacteria; Chloracidobacteria; RB41                                                     |
| Otu431  | 5        | 2       | 5       | 10      | 5       | 19      | 8         | 10        | 6         | 16        | 9         | 13        | Bacteria; Armatimonadetes; Fimbriimonadia; Fimbriimonadales; Fimbriimonadaceae; Fimbriimonas          |
| Otu430  | 34       | 8       | 16      | 17      | 11      | 34      | 21        | 27        | 17        | 31        | 25        | 24        | Bacteria; Chloroflexi; Anaerolineae; SBR1031; A4b                                                     |
| Otu433  | 0        | 21      | 0       | 0       | 2       | 0       | 0         | 0         | 0         | 0         | 0         | 0         | Bacteria; Chloroflexi; Anaerolineae; CFB-26                                                           |
| Otu432  | 26       | 7       | 5       | 11      | 1       | 4       | 11        | 13        | 4         | 3         | 4         | 2         | Bacteria; Verrucomicrobia; Spartobacteria; Chthoniobacteriales; Chthoniobacteraceae                   |
| Otu655  | 0        | 1       | 0       | 12      | 1       | 2       | 0         | 1         | 1         | 1         | 1         | 1         | Bacteria; Cyanobacteria; Chloroplast; Chlorophyta; Chlamydomonadaceae; Oophila; Oophila_amblystomatis |
| Otu654  | 4        | 0       | 6       | 14      | 1       | 6       | 5         | 3         | 1         | 5         | 24        | 3         | Bacteria; Verrucomicrobia; Spartobacteria; Chthoniobacteriales; Chthoniobacteraceae; Ellin506         |
| Otu657  | 19       | 13      | 4       | 2       | 1       | 4       | 1         | 0         | 0         | 16        | 11        | 0         | Bacteria; Bacteroidetes; Saprospirae; Saprospirales; Chitinophagaceae                                 |

| #OTU ID | Z31DSO1r | Z31DSO2 | Z31DSO3 | Z31DSO4 | Z31DSO5 | Z31DSO6 | Z31JDSO1 | Z31JDSO2 | Z31JDSO3 | Z31JDSO4 | Z31JDSO5 | Z31JDSO6 | taxonomy                                                                                             |
|---------|----------|---------|---------|---------|---------|---------|----------|----------|----------|----------|----------|----------|------------------------------------------------------------------------------------------------------|
| Otu656  | 13       | 2       | 0       | 0       | 0       | 2       | 1        | 0        | 0        | 0        | 1        | 0        | Bacteria; Armatimonadetes; Fimbriimonadia; Fimbriimonadales; Fimbriimonadaceae; Fimbriimonas         |
| Otu651  | 5        | 0       | 0       | 8       | 0       | 3       | 3        | 10       | 14       | 8        | 2        | 10       | Bacteria; Gemmatimonadetes; Gemmatimonadetes                                                         |
| Otu650  | 2        | 20      | 1       | 2       | 0       | 1       | 0        | 0        | 0        | 0        | 0        | 0        | Bacteria; Gemmatimonadetes; Gemm-1                                                                   |
| Otu653  | 9        | 2       | 1       | 7       | 1       | 0       | 15       | 0        | 1        | 1        | 5        | 0        | Bacteria; Bacteroidetes; Cytophagia; Cytophagales; Cytophagaceae                                     |
| Otu652  | 14       | 5       | 8       | 11      | 13      | 1       | 8        | 3        | 3        | 4        | 20       | 1        | Bacteria; Chloroflexi; Anaerolineae; Anaerolineales; Anaerolinaceae; Anaerolinea                     |
| Otu659  | 13       | 13      | 13      | 27      | 9       | 13      | 4        | 16       | 12       | 11       | 7        | 5        | Bacteria; Planctomycetes; Phycisphaerae; WD2101                                                      |
| Otu658  | 5        | 3       | 4       | 5       | 13      | 0       | 6        | 2        | 3        | 23       | 6        | 19       | Bacteria; Proteobacteria; Betaproteobacteria; Methylophilales; Methylophilaceae                      |
| Otu448  | 41       | 11      | 8       | 4       | 21      | 2       | 4        | 0        | 1        | 4        | 16       | 3        | Bacteria; Verrucomicrobia; Spartobacteria; Chthoniobacteriales; Chthoniobacteraceae; OR-59           |
| Otu449  | 5        | 7       | 9       | 13      | 3       | 3       | 13       | 2        | 8        | 7        | 23       | 1        | Bacteria; Actinobacteria; Thermoleophilia; Gaiellales; Gaiellaceae                                   |
| Otu1510 | 8        | 2       | 4       | 1       | 1       | 5       | 6        | 1        | 2        | 1        | 5        | 1        | Bacteria; Planctomycetes; Planctomycetia; Pirellulales; Pirellulaceae; Pirellula                     |
| Otu2698 | 0        | 2       | 2       | 0       | 3       | 0       | 2        | 1        | 2        | 2        | 2        | 2        | Bacteria; Firmicutes; Bacilli; Bacillales; Paenibacillaceae; Paenibacillus                           |
| Otu1511 | 7        | 2       | 1       | 5       | 3       | 2       | 1        | 0        | 4        | 3        | 1        | 2        | Bacteria; Proteobacteria; Alphaproteobacteria                                                        |
| Otu2696 | 0        | 0       | 0       | 0       | 0       | 0       | 0        | 0        | 4        | 0        | 2        | 0        | Bacteria; Actinobacteria; Actinobacteria; Actinomycetales                                            |
| Otu2697 | 0        | 0       | 0       | 0       | 0       | 2       | 0        | 0        | 2        | 0        | 0        | 0        | Bacteria; Proteobacteria; Gammaproteobacteria; Legionellales; Legionellaceae                         |
| Otu2694 | 2        | 0       | 0       | 1       | 0       | 0       | 1        | 0        | 0        | 0        | 0        | 0        | Bacteria; Proteobacteria; Gammaproteobacteria; HTCC2188; HTCC2089                                    |
| Otu2695 | 0        | 0       | 1       | 3       | 2       | 0       | 0        | 0        | 4        | 0        | 3        | 0        | Bacteria; Proteobacteria                                                                             |
| Otu2692 | 2        | 0       | 0       | 1       | 0       | 0       | 0        | 0        | 0        | 0        | 1        | 0        | Bacteria                                                                                             |
| Otu1512 | 0        | 0       | 1       | 6       | 0       | 0       | 0        | 0        | 0        | 0        | 1        | 0        | Bacteria; Proteobacteria; Gammaproteobacteria; Legionellales; Coxiellaceae                           |
| Otu2690 | 0        | 2       | 0       | 0       | 0       | 0       | 0        | 0        | 0        | 0        | 0        | 0        | Bacteria                                                                                             |
| Otu2691 | 1        | 3       | 4       | 2       | 3       | 1       | 2        | 0        | 4        | 3        | 1        | 4        | Bacteria; Proteobacteria; Deltaproteobacteria; Myxococcales                                          |
| Otu237  | 72       | 35      | 80      | 109     | 10      | 11      | 69       | 10       | 10       | 22       | 14       | 70       | Bacteria; Proteobacteria; Betaproteobacteria; Burkholderiales; Oxalobacteraceae; Cupriavidus         |
| Otu236  | 37       | 20      | 30      | 8       | 20      | 16      | 59       | 7        | 8        | 26       | 39       | 47       | Bacteria; Proteobacteria; Alphaproteobacteria; Rickettsiales; mitochondria; Pythium; Pythium_ultimum |

| #OTU ID | Z31DSO1r | Z31DSO2 | Z31DSO3 | Z31DSO4 | Z31DSO5 | Z31DSO6 | Z31JDSO1 | Z31JDSO2 | Z31JDSO3 | Z31JDSO4 | Z31JDSO5 | Z31JDSO6 | taxonomy                                                                                     |
|---------|----------|---------|---------|---------|---------|---------|----------|----------|----------|----------|----------|----------|----------------------------------------------------------------------------------------------|
| Otu235  | 26       | 1       | 6       | 28      | 2       | 17      | 18       | 61       | 72       | 9        | 5        | 30       | Bacteria; Bacteroidetes; Cytophagia; Cytophagales; Cytophagaceae                             |
| Otu234  | 56       | 6       | 10      | 9       | 6       | 9       | 7        | 5        | 2        | 20       | 28       | 1        | Bacteria; Proteobacteria; Deltaproteobacteria; Myxococcales                                  |
| Otu233  | 32       | 30      | 45      | 54      | 39      | 19      | 54       | 29       | 59       | 47       | 41       | 44       | Bacteria; Gemmatimonadetes; Gemmatimonadetes                                                 |
| Otu232  | 165      | 29      | 43      | 52      | 30      | 21      | 41       | 25       | 25       | 42       | 65       | 20       | Bacteria; Armatimonadetes; Chthonomonadetes; Chthonomonadales; Chthonomonadaceae             |
| Otu231  | 1        | 3       | 25      | 68      | 8       | 12      | 15       | 8        | 64       | 21       | 12       | 28       | Bacteria; Bacteroidetes; Saprospirae; Saprospirales; Chitinophagaceae                        |
| Otu230  | 87       | 33      | 43      | 37      | 49      | 14      | 51       | 9        | 16       | 49       | 70       | 8        | Bacteria; Acidobacteria; Solibacteres; Solibacterales                                        |
| Otu1514 | 5        | 5       | 0       | 3       | 2       | 2       | 1        | 1        | 1        | 1        | 3        | 0        | Bacteria; Proteobacteria; Deltaproteobacteria; Myxococcales                                  |
| Otu239  | 18       | 63      | 47      | 51      | 68      | 22      | 36       | 35       | 41       | 19       | 88       | 7        | Bacteria; Chloroflexi; Anaerolineae; GCA004                                                  |
| Otu238  | 54       | 13      | 36      | 42      | 30      | 20      | 49       | 3        | 19       | 21       | 56       | 16       | Bacteria; Chloroflexi; Chloroflexi; Roseiflexales; Kouleothrixaceae                          |
| Otu1806 | 0        | 0       | 0       | 3       | 0       | 3       | 1        | 1        | 2        | 1        | 1        | 2        | Bacteria; Armatimonadetes; Fimbriimonadia; Fimbriimonadales; Fimbriimonadaceae; Fimbriimonas |
| Otu1807 | 3        | 0       | 0       | 4       | 2       | 4       | 0        | 1        | 3        | 2        | 6        | 1        | Bacteria; AD3; ABS-6                                                                         |
| Otu1804 | 1        | 0       | 0       | 0       | 0       | 0       | 1        | 0        | 1        | 0        | 3        | 0        | Bacteria; Proteobacteria; Gammaproteobacteria; Legionellales                                 |
| Otu1805 | 0        | 0       | 4       | 2       | 0       | 0       | 2        | 1        | 2        | 3        | 2        | 1        | Bacteria; Firmicutes; Clostridia; Clostridiales; Clostridiaceae                              |
| Otu1802 | 0        | 6       | 0       | 0       | 0       | 0       | 0        | 0        | 0        | 0        | 1        | 0        | Bacteria; Chloroflexi; Anaerolineae; H39                                                     |
| Otu1516 | 15       | 9       | 1       | 21      | 1       | 2       | 2        | 1        | 1        | 4        | 5        | 0        | Bacteria; Bacteroidetes; Flavobacteriia; Flavobacteriales; Flavobacteriaceae; Flavobacterium |
| Otu1800 | 1        | 0       | 1       | 1       | 0       | 4       | 0        | 0        | 1        | 2        | 3        | 0        | Bacteria; Armatimonadetes; Armatimonadia; FW68                                               |
| Otu1801 | 0        | 0       | 0       | 3       | 0       | 2       | 0        | 0        | 2        | 3        | 0        | 2        | Bacteria                                                                                     |
| Otu440  | 36       | 14      | 9       | 5       | 10      | 2       | 3        | 3        | 5        | 2        | 17       | 2        | Bacteria; Nitrospirae; Nitrospira; Nitrospirales; 0319-6A21                                  |
| Otu1638 | 1        | 1       | 2       | 0       | 0       | 1       | 2        | 0        | 0        | 0        | 6        | 1        | Bacteria; Proteobacteria; Alphaproteobacteria                                                |
| Otu1517 | 15       | 9       | 8       | 5       | 7       | 5       | 7        | 11       | 4        | 9        | 10       | 5        | Bacteria; Bacteroidetes                                                                      |
| Otu1808 | 1        | 8       | 1       | 5       | 0       | 0       | 10       | 3        | 8        | 7        | 1        | 5        | Bacteria; Gemmatimonadetes; Gemmatimonadetes; Ellin5290                                      |
| Otu441  | 18       | 9       | 17      | 37      | 9       | 17      | 20       | 11       | 26       | 26       | 13       | 17       | Bacteria; Proteobacteria; Deltaproteobacteria; Myxococcales                                  |

| #OTU ID | Z31DSO1r | Z31DSO2 | Z31DSO3 | Z31DSO4 | Z31DSO5 | Z31DSO6 | Z31JDSO1 | Z31JDSO2 | Z31JDSO3 | Z31JDSO4 | Z31JDSO5 | Z31JDSO6 | taxonomy                                                                                     |
|---------|----------|---------|---------|---------|---------|---------|----------|----------|----------|----------|----------|----------|----------------------------------------------------------------------------------------------|
| Otu1518 | 8        | 0       | 2       | 3       | 5       | 0       | 0        | 0        | 0        | 0        | 5        | 0        | Bacteria; Chloroflexi; Anaerolineae; SBR1031; oc28                                           |
| Otu3248 | 23       | 6       | 3       | 7       | 2       | 9       | 10       | 4        | 11       | 12       | 9        | 5        | Bacteria; Proteobacteria; Betaproteobacteria; SC-I-84                                        |
| Otu3249 | 0        | 0       | 3       | 2       | 1       | 0       | 1        | 0        | 1        | 0        | 0        | 0        | Bacteria; Chloroflexi                                                                        |
| Otu3242 | 0        | 0       | 0       | 1       | 1       | 0       | 2        | 1        | 4        | 2        | 1        | 3        | Bacteria; Planctomycetes; Planctomycetia; Gemmatales; Gemmataceae                            |
| Otu3243 | 5        | 1       | 0       | 0       | 3       | 0       | 0        | 0        | 0        | 0        | 0        | 0        | Bacteria; Proteobacteria; Deltaproteobacteria; Myxococcales                                  |
| Otu3240 | 1        | 0       | 0       | 0       | 0       | 0       | 0        | 0        | 0        | 0        | 3        | 0        | Bacteria; Chloroflexi; Anaerolineae; SBR1031; A4b                                            |
| Otu3241 | 2        | 1       | 0       | 0       | 0       | 0       | 0        | 0        | 0        | 0        | 0        | 0        | Bacteria; Proteobacteria; Gammaproteobacteria; Legionellales; Legionellaceae                 |
| Otu3246 | 1        | 1       | 0       | 3       | 0       | 0       | 2        | 0        | 2        | 0        | 0        | 1        | Bacteria; Chlamydiae; Chlamydia; Chlamydiales                                                |
| Otu3247 | 0        | 0       | 0       | 0       | 0       | 2       | 0        | 0        | 2        | 0        | 0        | 0        | Bacteria; Proteobacteria; Deltaproteobacteria; Myxococcales                                  |
| Otu3244 | 0        | 0       | 0       | 0       | 0       | 3       | 1        | 2        | 1        | 0        | 0        | 0        | Bacteria; Planctomycetes; Planctomycetia; Gemmatales; Isosphaeraeaceae                       |
| Otu3245 | 2        | 0       | 2       | 0       | 1       | 0       | 0        | 0        | 2        | 1        | 1        | 0        | Bacteria; Proteobacteria; Alphaproteobacteria; Rhodospirillales                              |
| Otu2349 | 2        | 0       | 0       | 0       | 0       | 1       | 0        | 0        | 1        | 0        | 0        | 0        | Bacteria; Proteobacteria; Deltaproteobacteria; Myxococcales                                  |
| Otu2340 | 1        | 1       | 1       | 2       | 2       | 0       | 0        | 0        | 0        | 0        | 0        | 0        | Bacteria; Nitrospirae; Nitrospira; Nitrospirales; Nitrospiraceae; JG37-AG-70                 |
| Otu2341 | 2        | 0       | 0       | 0       | 0       | 0       | 0        | 0        | 1        | 2        | 1        | 0        | Bacteria; Proteobacteria                                                                     |
| Otu2342 | 4        | 3       | 2       | 5       | 2       | 5       | 9        | 8        | 7        | 2        | 9        | 2        | Bacteria; Firmicutes; Clostridia; Clostridiales; Clostridiaceae; Clostridium                 |
| Otu2343 | 0        | 0       | 1       | 1       | 1       | 1       | 0        | 0        | 0        | 1        | 4        | 1        | Bacteria; Proteobacteria; Deltaproteobacteria; Desulfuromonadales; Geobacteraceae; Geobacter |
| Otu2344 | 0        | 0       | 0       | 2       | 0       | 0       | 3        | 1        | 0        | 0        | 0        | 0        | Bacteria; Proteobacteria; Alphaproteobacteria; Caulobacterales; Caulobacteraceae             |
| Otu2345 | 2        | 0       | 0       | 0       | 0       | 0       | 0        | 0        | 0        | 0        | 1        | 0        | Bacteria; Firmicutes; Clostridia; OPB54                                                      |
| Otu2346 | 0        | 0       | 0       | 0       | 0       | 0       | 0        | 2        | 3        | 0        | 1        | 0        | Bacteria; Elusimicrobia; Elusimicrobia; Elusimicrobiales                                     |
| Otu2347 | 0        | 0       | 0       | 0       | 0       | 0       | 2        | 0        | 1        | 0        | 2        | 1        | Bacteria; Cyanobacteria; Chloroplast; Chlorophyta; Chlamydomonadales                         |
| Otu3336 | 0        | 0       | 0       | 1       | 2       | 1       | 0        | 1        | 1        | 0        | 0        | 0        | Bacteria; Acidobacteria; Holophagae; Holophagales; Holophagaceae                             |
| Otu3192 | 0        | 0       | 1       | 1       | 0       | 0       | 3        | 0        | 0        | 0        | 0        | 2        | Bacteria; Proteobacteria; Deltaproteobacteria; Myxococcales; Cystobacterineae                |

| #OTU ID | Z31DSO1r | Z31DSO2 | Z31DSO3 | Z31DSO4 | Z31DSO5 | Z31DSO6 | Z31JDSO1 | Z31JDSO2 | Z31JDSO3 | Z31JDSO4 | Z31JDSO5 | Z31JDSO6 | taxonomy                                                                                           |
|---------|----------|---------|---------|---------|---------|---------|----------|----------|----------|----------|----------|----------|----------------------------------------------------------------------------------------------------|
| Otu3334 | 1        | 1       | 0       | 0       | 0       | 0       | 0        | 0        | 2        | 1        | 0        | 0        | Bacteria; Proteobacteria; Deltaproteobacteria; Bdellovibrionales; Bdellovibrionaceae; Bdellovibrio |
| Otu3335 | 3        | 0       | 0       | 1       | 0       | 2       | 1        | 0        | 1        | 1        | 1        | 1        | Bacteria; Proteobacteria; Alphaproteobacteria; Rhodospirillales; Acetobacteraceae                  |
| Otu2209 | 0        | 3       | 2       | 1       | 0       | 0       | 0        | 0        | 0        | 0        | 0        | 0        | Bacteria; Chloroflexi; TK10                                                                        |
| Otu2208 | 0        | 0       | 0       | 1       | 1       | 0       | 1        | 1        | 0        | 4        | 5        | 5        | Bacteria; Planctomycetes; Planctomycetia; Gemmatales; Gemmataceae                                  |
| Otu3330 | 1        | 0       | 1       | 1       | 0       | 0       | 0        | 0        | 0        | 3        | 0        | 0        | Bacteria; Planctomycetes; Planctomycetia; Gemmatales; Gemmataceae                                  |
| Otu3331 | 2        | 0       | 0       | 0       | 0       | 0       | 0        | 0        | 0        | 0        | 0        | 0        | Bacteria; Proteobacteria; Alphaproteobacteria; Sphingomonadales; Erythrobacteraceae                |
| Otu2205 | 0        | 0       | 0       | 0       | 1       | 3       | 1        | 1        | 0        | 3        | 0        | 0        | Bacteria; Proteobacteria; Gammaproteobacteria; Legionellales; Coxiellaceae                         |
| Otu2204 | 64       | 39      | 18      | 45      | 18      | 52      | 40       | 42       | 44       | 34       | 35       | 29       | Bacteria; Proteobacteria; Deltaproteobacteria; Myxococcales; Haliangiaceae                         |
| Otu2207 | 0        | 0       | 0       | 0       | 0       | 0       | 0        | 0        | 0        | 3        | 0        | 1        | Bacteria; Cyanobacteria; 4C0d-2; MLE1-12                                                           |
| Otu2206 | 0        | 1       | 1       | 5       | 1       | 3       | 3        | 5        | 2        | 2        | 2        | 4        | Bacteria; Elusimicrobia; Elusimicrobia; FAC88                                                      |
| Otu2201 | 0        | 0       | 2       | 0       | 0       | 0       | 0        | 0        | 0        | 1        | 3        | 0        | Bacteria; Proteobacteria; Deltaproteobacteria; Myxococcales                                        |
| Otu2200 | 4        | 1       | 1       | 2       | 0       | 5       | 8        | 5        | 5        | 4        | 1        | 1        | Bacteria; Proteobacteria; Alphaproteobacteria; Caulobacterales; Caulobacteraceae                   |
| Otu2203 | 0        | 0       | 0       | 1       | 1       | 4       | 2        | 0        | 0        | 2        | 0        | 0        | Bacteria; Cyanobacteria; 4C0d-2; MLE1-12                                                           |
| Otu2202 | 2        | 3       | 2       | 2       | 1       | 0       | 4        | 2        | 0        | 1        | 2        | 0        | Bacteria; Proteobacteria; Gammaproteobacteria; Legionellales; Coxiellaceae; Aquicella              |
| Otu3337 | 2        | 0       | 0       | 1       | 2       | 0       | 1        | 3        | 0        | 2        | 0        | 1        | Bacteria; Proteobacteria; Gammaproteobacteria; Legionellales                                       |
| Otu3193 | 2        | 0       | 0       | 0       | 0       | 0       | 0        | 0        | 0        | 0        | 0        | 0        | Bacteria; Planctomycetes; OM190; CL500-15                                                          |
| Otu3332 | 0        | 0       | 2       | 0       | 0       | 0       | 0        | 0        | 0        | 0        | 1        | 0        | Bacteria; Proteobacteria; Gammaproteobacteria                                                      |
| Otu1558 | 0        | 1       | 3       | 1       | 2       | 10      | 3        | 5        | 9        | 1        | 2        | 2        | Bacteria; Actinobacteria; Actinobacteria; Actinomycetales                                          |
| Otu3333 | 1        | 8       | 2       | 1       | 0       | 0       | 0        | 0        | 0        | 0        | 3        | 0        | Bacteria; Planctomycetes; OM190; CL500-15                                                          |
| Otu1452 | 8        | 0       | 1       | 5       | 3       | 4       | 6        | 3        | 2        | 2        | 10       | 0        | Bacteria; Actinobacteria; Thermoleophilia; Solirubrobacterales                                     |
| Otu9    | 328      | 263     | 649     | 294     | 394     | 422     | 1710     | 225      | 170      | 186      | 156      | 876      | Bacteria; Proteobacteria; Betaproteobacteria; Burkholderiales; Comamonadaceae; Hylemonella         |
| Otu6    | 92       | 208     | 248     | 194     | 680     | 352     | 1144     | 176      | 39       | 42       | 104      | 491      | Bacteria; Proteobacteria; Gammaproteobacteria; Pseudomonadales; Pseudomonadaceae; Pseudomonas      |

| #OTU ID | Z31DSO1r | Z31DSO2 | Z31DSO3 | Z31DSO4 | Z31DSO5 | Z31DSO6 | Z31J1DSO1 | Z31J1DSO2 | Z31J1DSO3 | Z31J1DSO4 | Z31J1DSO5 | Z31J1DSO6 | taxonomy                                                                                                                                         |
|---------|----------|---------|---------|---------|---------|---------|-----------|-----------|-----------|-----------|-----------|-----------|--------------------------------------------------------------------------------------------------------------------------------------------------|
| Otu7    | 681      | 375     | 354     | 680     | 444     | 395     | 496       | 880       | 430       | 598       | 598       | 231       | Bacteria; Acidobacteria; Chloracidobacteria; RB41; Ellin6075                                                                                     |
| Otu4    | 3        | 8       | 2       | 13      | 0       | 9       | 1408      | 8         | 3         | 6         | 1         | 24        | Bacteria; Bacteroidetes; Sphingobacteriia; Sphingobacteriales; Sphingobacteriaceae; Pedobacter                                                   |
| Otu5    | 29       | 2       | 171     | 55      | 25      | 31      | 80        | 206       | 20        | 1205      | 8         | 574       | Bacteria; Bacteroidetes; Sphingobacteriia; Sphingobacteriales; Sphingobacteriaceae; Sphingobacterium; Sphingobacterium_multivorum                |
| Otu2    | 7        | 32      | 18      | 79      | 3       | 34      | 66        | 61        | 0         | 687       | 3         | 1305      | Bacteria; Bacteroidetes; Flavobacteriia; Flavobacteriales; Weeksellaceae; Chryseobacterium                                                       |
| Otu3    | 1677     | 403     | 525     | 803     | 326     | 254     | 1194      | 561       | 672       | 892       | 712       | 565       | Bacteria; Proteobacteria; Alphaproteobacteria; Sphingomonadales; Sphingomonadaceae; Kaistobacter                                                 |
| Otu1    | 212      | 317     | 1183    | 382     | 1640    | 1550    | 2089      | 749       | 375       | 280       | 150       | 879       | Bacteria; Bacteroidetes; Sphingobacteriia; Sphingobacteriales; Sphingobacteriaceae                                                               |
| Otu2119 | 0        | 2       | 0       | 1       | 0       | 0       | 0         | 4         | 1         | 1         | 2         | 1         | Bacteria; Elusimicrobia; Elusimicrobia; I1b                                                                                                      |
| Otu2118 | 0        | 0       | 0       | 0       | 0       | 0       | 0         | 0         | 4         | 0         | 0         | 0         | Bacteria; Acidobacteria; Acidobacteriia; Acidobacteriales; Koribacteraceae; Candidatus_Koribacter                                                |
| Otu1559 | 5        | 2       | 1       | 2       | 0       | 8       | 5         | 3         | 0         | 5         | 3         | 1         | Bacteria; Chloroflexi                                                                                                                            |
| Otu1668 | 41       | 4       | 3       | 7       | 3       | 4       | 4         | 2         | 5         | 5         | 9         | 2         | Bacteria; Planctomycetes; Phycisphaerae; WD2101                                                                                                  |
| Otu1669 | 4        | 2       | 2       | 0       | 1       | 1       | 0         | 2         | 2         | 2         | 3         | 1         | Bacteria; Gemmatimonadetes; Gemm-1                                                                                                               |
| Otu1666 | 2        | 5       | 0       | 2       | 0       | 0       | 0         | 0         | 0         | 1         | 3         | 0         | Bacteria; Armatimonadetes; Fimbriimonadia; Fimbriimonadales; Fimbriimonadaceae                                                                   |
| Otu1667 | 0        | 0       | 0       | 2       | 1       | 0       | 1         | 0         | 1         | 2         | 5         | 2         | Bacteria; Proteobacteria; Alphaproteobacteria; Rhodospirillales; Rhodospirillaceae                                                               |
| Otu1664 | 2        | 0       | 2       | 1       | 1       | 3       | 2         | 1         | 4         | 0         | 4         | 2         | Bacteria; Proteobacteria; Betaproteobacteria; Burkholderiales; Burkholderiaceae; Candidatus_Glomeribacter; Candidatus_Glomeribacter_vicinasporum |
| Otu1665 | 0        | 0       | 2       | 3       | 0       | 6       | 6         | 0         | 2         | 2         | 4         | 1         | Bacteria; Actinobacteria; Actinobacteriales; Actinomycetales                                                                                     |
| Otu1662 | 0        | 0       | 0       | 1       | 1       | 0       | 0         | 0         | 0         | 0         | 5         | 0         | Bacteria; Bacteroidetes; Sphingobacteriia; Sphingobacteriales                                                                                    |
| Otu1663 | 1        | 1       | 5       | 6       | 2       | 0       | 1         | 0         | 1         | 0         | 1         | 0         | Bacteria; Bacteroidetes; Cytophagia; Cytophagales; Cytophagaceae; Spirosoma                                                                      |
| Otu1660 | 0        | 0       | 0       | 4       | 0       | 0       | 0         | 0         | 0         | 0         | 0         | 0         | Bacteria; Bacteroidetes; Saprospirae; Saprospirales; Chitinophagaceae                                                                            |
| Otu1661 | 2        | 0       | 1       | 2       | 4       | 0       | 2         | 1         | 0         | 3         | 5         | 0         | Bacteria; Actinobacteria; Rubrobacteria; Rubrobacteriales; Rubrobacteraceae; Rubrobacter                                                         |
| Otu963  | 7        | 1       | 0       | 1       | 1       | 0       | 1         | 0         | 0         | 0         | 1         | 1         | Bacteria; Bacteroidetes; Sphingobacteriia; Sphingobacteriales                                                                                    |
| Otu3338 | 13       | 11      | 7       | 11      | 6       | 8       | 31        | 23        | 14        | 34        | 8         | 11        | Bacteria; Acidobacteria; Sva0725; Sva0725                                                                                                        |
| Otu746  | 10       | 1       | 1       | 5       | 1       | 0       | 2         | 7         | 5         | 1         | 2         | 1         | Bacteria; WPS-2                                                                                                                                  |



| #OTU ID | Z31DSO1r | Z31DSO2 | Z31DSO3 | Z31DSO4 | Z31DSO5 | Z31DSO6 | Z31JDSO1 | Z31JDSO2 | Z31JDSO3 | Z31JDSO4 | Z31JDSO5 | Z31JDSO6 | taxonomy                                                                                      |
|---------|----------|---------|---------|---------|---------|---------|----------|----------|----------|----------|----------|----------|-----------------------------------------------------------------------------------------------|
| Otu3339 | 4        | 3       | 4       | 4       | 3       | 2       | 4        | 2        | 9        | 7        | 3        | 8        | Bacteria; Verrucomicrobia; Opiritae; Opiritales; Opiritaceae                                  |
| Otu961  | 4        | 0       | 4       | 11      | 0       | 20      | 6        | 41       | 29       | 12       | 5        | 19       | Bacteria; Acidobacteria; Solibacteres; Solibacterales                                         |
| Otu960  | 4        | 9       | 3       | 11      | 5       | 3       | 7        | 2        | 6        | 9        | 5        | 3        | Bacteria; Chloroflexi; S085                                                                   |
| Otu743  | 4        | 4       | 7       | 5       | 3       | 3       | 9        | 5        | 14       | 11       | 7        | 3        | Bacteria; Acidobacteria; Chloracidobacteria                                                   |
| Otu742  | 0        | 3       | 1       | 1       | 1       | 0       | 0        | 0        | 0        | 0        | 13       | 0        | Bacteria; Bacteroidetes; Sphingobacteriia; Sphingobacteriales                                 |
| Otu741  | 24       | 20      | 17      | 18      | 19      | 24      | 24       | 12       | 11       | 10       | 35       | 5        | Bacteria; Actinobacteria; Actinobacteria; Actinomycetales; Micromonosporaceae; Pilimelia      |
| Otu740  | 14       | 5       | 8       | 14      | 7       | 4       | 8        | 7        | 4        | 8        | 12       | 0        | Bacteria; Acidobacteria; Chloracidobacteria                                                   |
| Otu2979 | 0        | 0       | 0       | 5       | 1       | 0       | 2        | 1        | 1        | 3        | 0        | 2        | Bacteria; Proteobacteria; Gammaproteobacteria                                                 |
| Otu2978 | 4        | 1       | 1       | 0       | 1       | 0       | 1        | 4        | 3        | 1        | 1        | 0        | Bacteria; Gemmatimonadetes; Gemm-5                                                            |
| Otu2973 | 1        | 2       | 0       | 1       | 1       | 1       | 0        | 0        | 1        | 0        | 3        | 0        | Bacteria; Proteobacteria; TA18; CV90                                                          |
| Otu2972 | 0        | 0       | 0       | 1       | 0       | 0       | 0        | 0        | 0        | 2        | 1        | 0        | Bacteria; Firmicutes; Clostridia; Clostridiales; Clostridiaceae; Caloramator                  |
| Otu2971 | 5        | 2       | 2       | 3       | 2       | 4       | 3        | 1        | 2        | 4        | 4        | 2        | Bacteria; Gemmatimonadetes; Gemm-2                                                            |
| Otu2970 | 0        | 4       | 1       | 2       | 1       | 3       | 6        | 1        | 6        | 1        | 5        | 0        | Bacteria; Actinobacteria; Actinobacteria; Actinomycetales; Pseudonocardiaceae; Pseudonocardia |
| Otu2977 | 3        | 0       | 0       | 0       | 0       | 0       | 0        | 0        | 1        | 0        | 0        | 0        | Bacteria; Proteobacteria; Alphaproteobacteria; Rickettsiales; mitochondria                    |
| Otu2976 | 2        | 0       | 0       | 0       | 0       | 0       | 0        | 0        | 0        | 0        | 0        | 0        | Bacteria                                                                                      |
| Otu2975 | 2        | 2       | 0       | 0       | 1       | 0       | 0        | 0        | 0        | 0        | 1        | 0        | Bacteria; Nitrospirae; Nitrospira; Nitrospirales; 0319-6A21                                   |
| Otu2974 | 0        | 0       | 0       | 0       | 0       | 0       | 0        | 0        | 0        | 2        | 0        | 3        | Bacteria; Proteobacteria; Gammaproteobacteria; Legionellales                                  |
| Otu2822 | 0        | 1       | 1       | 3       | 3       | 1       | 6        | 9        | 10       | 2        | 4        | 6        | Bacteria; Proteobacteria; Deltaproteobacteria; Myxococcales                                   |
| Otu1279 | 21       | 11      | 15      | 11      | 14      | 3       | 16       | 3        | 6        | 6        | 17       | 5        | Bacteria; Gemmatimonadetes; Gemm-1                                                            |
| Otu1278 | 6        | 3       | 4       | 7       | 1       | 2       | 1        | 1        | 6        | 1        | 1        | 0        | Bacteria; Proteobacteria; Deltaproteobacteria; Myxococcales                                   |
| Otu1275 | 6        | 3       | 4       | 9       | 1       | 1       | 2        | 3        | 2        | 3        | 4        | 2        | Bacteria; Proteobacteria; Gammaproteobacteria                                                 |
| Otu1274 | 25       | 18      | 18      | 21      | 17      | 13      | 31       | 23       | 32       | 24       | 26       | 21       | Bacteria; Proteobacteria; Alphaproteobacteria; Rhodospirillales; Acetobacteraceae             |

| #OTU ID | Z31DSO1r | Z31DSO2 | Z31DSO3 | Z31DSO4 | Z31DSO5 | Z31DSO6 | Z31J1DSO1 | Z31J1DSO2 | Z31J1DSO3 | Z31J1DSO4 | Z31J1DSO5 | Z31J1DSO6 | taxonomy                                                                                        |
|---------|----------|---------|---------|---------|---------|---------|-----------|-----------|-----------|-----------|-----------|-----------|-------------------------------------------------------------------------------------------------|
| Otu1277 | 1        | 1       | 0       | 0       | 2       | 0       | 4         | 0         | 1         | 5         | 0         | 4         | Bacteria; Proteobacteria; Deltaproteobacteria; Myxococcales                                     |
| Otu1276 | 3        | 1       | 1       | 2       | 0       | 8       | 2         | 1         | 4         | 1         | 2         | 1         | Bacteria; Bacteroidetes; Sphingobacteriia; Sphingobacteriales                                   |
| Otu1271 | 0        | 0       | 0       | 0       | 0       | 0       | 0         | 0         | 6         | 0         | 0         | 0         | Bacteria                                                                                        |
| Otu1270 | 0        | 2       | 2       | 2       | 0       | 1       | 1         | 0         | 0         | 1         | 5         | 0         | Bacteria; Bacteroidetes; VC2_1_Bac22                                                            |
| Otu1273 | 5        | 1       | 1       | 4       | 0       | 11      | 18        | 16        | 9         | 3         | 3         | 16        | Bacteria; Acidobacteria; Acidobacteriia; Acidobacteriales; Koribacteraceae                      |
| Otu1272 | 5        | 0       | 0       | 0       | 0       | 0       | 0         | 0         | 0         | 0         | 0         | 0         | Bacteria; Proteobacteria; Deltaproteobacteria; Myxococcales                                     |
| Otu3094 | 0        | 0       | 0       | 1       | 0       | 0       | 0         | 0         | 0         | 0         | 2         | 0         | Bacteria; Bacteroidetes                                                                         |
| Otu1479 | 5        | 4       | 11      | 9       | 6       | 3       | 12        | 8         | 9         | 10        | 16        | 4         | Bacteria; Firmicutes; Clostridia; Clostridiales; Clostridiaceae; Clostridium                    |
| Otu1478 | 1        | 0       | 0       | 4       | 1       | 4       | 2         | 0         | 1         | 1         | 3         | 1         | Bacteria; Cyanobacteria; Synechococcophycideae; Pseudanabaenales; Pseudanabaenaceae             |
| Otu1477 | 7        | 8       | 2       | 2       | 6       | 0       | 4         | 0         | 1         | 0         | 7         | 1         | Bacteria; Acidobacteria; Acidobacteria-6; iii1-15; mb2424                                       |
| Otu1476 | 0        | 0       | 0       | 0       | 0       | 0       | 2         | 0         | 0         | 4         | 2         | 0         | Bacteria; Fibrobacteres                                                                         |
| Otu1475 | 1        | 0       | 4       | 5       | 0       | 0       | 3         | 2         | 4         | 1         | 2         | 3         | Bacteria; Chlamydiae; Chlamydiai; Chlamydiales; Rhabdochlamydiaceae; Candidatus_Rhabdochlamydia |
| Otu1474 | 10       | 3       | 0       | 5       | 2       | 3       | 5         | 7         | 4         | 1         | 6         | 0         | Bacteria; Chloroflexi                                                                           |
| Otu1473 | 6        | 3       | 4       | 3       | 1       | 6       | 4         | 5         | 4         | 2         | 3         | 2         | Bacteria; Planctomycetes; Planctomycetia; Pirellulales; Pirellulaceae; A17                      |
| Otu1472 | 5        | 1       | 4       | 3       | 0       | 1       | 1         | 1         | 0         | 0         | 2         | 0         | Bacteria; Proteobacteria; Betaproteobacteria; SC-I-84                                           |
| Otu1471 | 3        | 5       | 3       | 3       | 7       | 5       | 3         | 0         | 4         | 2         | 5         | 1         | Bacteria; Chloroflexi; Anaerolineae; SBR1031; oc28                                              |
| Otu1470 | 0        | 1       | 0       | 9       | 0       | 0       | 0         | 1         | 0         | 0         | 2         | 0         | Bacteria; Proteobacteria; Deltaproteobacteria; Myxococcales                                     |
| Otu3422 | 0        | 0       | 2       | 0       | 0       | 0       | 0         | 0         | 0         | 0         | 0         | 0         | Bacteria; Chlorobi; OPB56                                                                       |
| Otu3423 | 2        | 1       | 1       | 0       | 2       | 0       | 0         | 0         | 0         | 1         | 2         | 0         | Bacteria; Gemmatimonadetes; Gemmatimonadetes                                                    |
| Otu2620 | 0        | 2       | 0       | 4       | 1       | 0       | 2         | 0         | 1         | 2         | 0         | 1         | Bacteria; Proteobacteria; Alphaproteobacteria; Rickettsiales; mitochondria                      |
| Otu2807 | 0        | 2       | 2       | 0       | 1       | 2       | 0         | 3         | 1         | 0         | 2         | 0         | Bacteria; Chloroflexi; C0119                                                                    |
| Otu2788 | 0        | 0       | 0       | 0       | 0       | 0       | 1         | 0         | 0         | 3         | 1         | 0         | Bacteria; Chloroflexi                                                                           |

| #OTU ID | Z31DSO1r | Z31DSO2 | Z31DSO3 | Z31DSO4 | Z31DSO5 | Z31DSO6 | Z31JDSO1 | Z31JDSO2 | Z31JDSO3 | Z31JDSO4 | Z31JDSO5 | Z31JDSO6 | taxonomy                                                                                            |
|---------|----------|---------|---------|---------|---------|---------|----------|----------|----------|----------|----------|----------|-----------------------------------------------------------------------------------------------------|
| Otu2805 | 0        | 0       | 2       | 0       | 0       | 0       | 0        | 0        | 0        | 0        | 0        | 0        | Bacteria; Verrucomicrobia; Spartobacteria; Chthoniobacteriales; Chthoniobacteraceae; OR-59          |
| Otu2804 | 2        | 1       | 1       | 4       | 1       | 0       | 7        | 0        | 2        | 1        | 6        | 2        | Bacteria; Verrucomicrobia; Spartobacteria; Chthoniobacteriales; Chthoniobacteraceae                 |
| Otu2803 | 3        | 0       | 0       | 0       | 0       | 1       | 2        | 0        | 1        | 0        | 2        | 1        | Bacteria; Chloroflexi; Anaerolineae; Anaerolineales; Anaerolineaceae; Anaerolinea                   |
| Otu2802 | 0        | 0       | 0       | 2       | 0       | 1       | 0        | 0        | 1        | 0        | 0        | 0        | Bacteria; Armatimonadetes; Chthonomonadetes; Chthonomonadales; Chthonomonadaceae                    |
| Otu2801 | 2        | 3       | 1       | 0       | 1       | 0       | 0        | 0        | 0        | 1        | 0        | 0        | Bacteria; Proteobacteria                                                                            |
| Otu2789 | 0        | 2       | 2       | 0       | 0       | 0       | 0        | 0        | 0        | 0        | 2        | 0        | Bacteria; Proteobacteria; Deltaproteobacteria; Spirobaillales                                       |
| Otu3408 | 2        | 0       | 0       | 0       | 0       | 0       | 0        | 0        | 0        | 0        | 0        | 0        | Bacteria; Planctomycetes; Planctomycetia; Pirellulales; Pirellulaceae; Pirellula                    |
| Otu3409 | 0        | 0       | 0       | 0       | 1       | 0       | 0        | 0        | 0        | 2        | 3        | 0        | Bacteria; Proteobacteria; Deltaproteobacteria; Bdellovibrionales; Bdellovibrionaceae; Bdellovibrio  |
| Otu2809 | 1        | 3       | 2       | 1       | 1       | 0       | 0        | 0        | 0        | 0        | 0        | 0        | Bacteria                                                                                            |
| Otu2808 | 1        | 0       | 0       | 1       | 0       | 0       | 1        | 1        | 1        | 1        | 2        | 0        | Bacteria; Chloroflexi; Thermomicrobia; Ellin6537                                                    |
| Otu3019 | 2        | 0       | 1       | 1       | 1       | 2       | 1        | 1        | 2        | 4        | 0        | 3        | Bacteria; Planctomycetes; Planctomycetia; Gemmatales; Isosphaeraeae                                 |
| Otu2780 | 3        | 0       | 2       | 0       | 0       | 0       | 1        | 0        | 0        | 0        | 0        | 0        | Bacteria; Armatimonadetes; 0319-6E2                                                                 |
| Otu1588 | 9        | 7       | 10      | 11      | 8       | 5       | 3        | 3        | 4        | 8        | 10       | 2        | Bacteria; Chloroflexi; Anaerolineae; SBR1031; oc28                                                  |
| Otu98   | 151      | 85      | 87      | 160     | 107     | 70      | 89       | 62       | 68       | 188      | 131      | 85       | Bacteria; Verrucomicrobia; Pedosphaerae; Pedosphaerales; Ellin517                                   |
| Otu99   | 139      | 13      | 28      | 61      | 3       | 36      | 57       | 45       | 58       | 54       | 30       | 41       | Bacteria; Proteobacteria; Alphaproteobacteria; Ellin329                                             |
| Otu2781 | 4        | 4       | 5       | 4       | 1       | 3       | 9        | 1        | 3        | 4        | 7        | 2        | Bacteria; Firmicutes; Bacilli; Bacillales; Bacillaceae; Bacillus                                    |
| Otu94   | 143      | 177     | 123     | 80      | 71      | 48      | 41       | 30       | 43       | 40       | 117      | 45       | Bacteria; Acidobacteria; Chloracidobacteria; 11-24                                                  |
| Otu95   | 167      | 97      | 96      | 128     | 74      | 60      | 165      | 83       | 104      | 122      | 115      | 87       | Bacteria; Proteobacteria; Alphaproteobacteria; Caulobacteriales; Caulobacteraceae; Phenylobacterium |
| Otu96   | 24       | 7       | 27      | 10      | 30      | 16      | 127      | 6        | 8        | 47       | 5        | 15       | Bacteria; Proteobacteria; Alphaproteobacteria; Sphingomonadales; Sphingomonadaceae; Novosphingobium |
| Otu97   | 21       | 16      | 48      | 78      | 9       | 26      | 58       | 126      | 34       | 44       | 10       | 40       | Bacteria; Proteobacteria; Gammaproteobacteria; Enterobacteriales; Enterobacteriaceae                |
| Otu90   | 234      | 58      | 79      | 171     | 44      | 70      | 207      | 194      | 190      | 128      | 128      | 147      | Bacteria; Acidobacteria; Acidobacteriia; Acidobacteriales; Acidobacteriaceae                        |
| Otu91   | 302      | 75      | 41      | 73      | 25      | 63      | 78       | 80       | 65       | 58       | 54       | 96       | Bacteria; Proteobacteria; Gammaproteobacteria; Xanthomonadales; Xanthomonadaceae                    |

| #OTU ID | Z31DSO1r | Z31DSO2 | Z31DSO3 | Z31DSO4 | Z31DSO5 | Z31DSO6 | Z31JDSO1 | Z31JDSO2 | Z31JDSO3 | Z31JDSO4 | Z31JDSO5 | Z31JDSO6 | taxonomy                                                                                                          |
|---------|----------|---------|---------|---------|---------|---------|----------|----------|----------|----------|----------|----------|-------------------------------------------------------------------------------------------------------------------|
| Otu92   | 137      | 0       | 1       | 2       | 0       | 0       | 1        | 0        | 0        | 2        | 0        | 0        | Bacteria; Proteobacteria; Betaproteobacteria; Neisseriales; Neisseriaceae                                         |
| Otu93   | 14       | 9       | 82      | 124     | 12      | 24      | 54       | 70       | 135      | 67       | 92       | 13       | Bacteria; Acidobacteria; Acidobacteriia; Acidobacteriales; Koribacteraceae; Candidatus_Koribacter                 |
| Otu3484 | 2        | 0       | 0       | 1       | 0       | 2       | 2        | 1        | 4        | 0        | 1        | 0        | Bacteria; Proteobacteria; Alphaproteobacteria; Rickettsiales; mitochondria                                        |
| Otu1551 | 0        | 1       | 0       | 0       | 0       | 1       | 1        | 0        | 1        | 0        | 5        | 0        | Bacteria; Chloroflexi; Anaerolineae; GCA004                                                                       |
| Otu2787 | 2        | 0       | 0       | 0       | 0       | 0       | 0        | 0        | 0        | 0        | 0        | 1        | Bacteria; Proteobacteria; Deltaproteobacteria; MIZ46                                                              |
| Otu1055 | 0        | 0       | 1       | 8       | 2       | 1       | 1        | 2        | 4        | 0        | 2        | 1        | Bacteria                                                                                                          |
| Otu1054 | 16       | 22      | 6       | 9       | 9       | 4       | 6        | 2        | 4        | 3        | 11       | 4        | Bacteria; Nitrospirae; Nitrospira; Nitrospirales; 0319-6A21                                                       |
| Otu1057 | 10       | 3       | 10      | 19      | 7       | 23      | 15       | 15       | 14       | 36       | 11       | 21       | Bacteria; Acidobacteria; Acidobacteriia; Acidobacteriales; Koribacteraceae                                        |
| Otu1056 | 7        | 2       | 1       | 0       | 0       | 0       | 0        | 0        | 2        | 1        | 1        | 0        | Bacteria; Acidobacteria; Solibacteres; Solibacterales                                                             |
| Otu1051 | 5        | 2       | 6       | 8       | 8       | 0       | 5        | 1        | 3        | 3        | 7        | 3        | Bacteria; Proteobacteria; Deltaproteobacteria; Myxococcales                                                       |
| Otu1050 | 11       | 1       | 2       | 0       | 0       | 0       | 0        | 0        | 0        | 1        | 0        | 0        | Bacteria; Planctomycetes; Planctomycetia; Pirellulales; Pirellulaceae; Pirellula                                  |
| Otu1053 | 0        | 1       | 0       | 2       | 1       | 0       | 0        | 0        | 0        | 1        | 0        | 9        | Bacteria; Proteobacteria; Deltaproteobacteria; Spirobaillales                                                     |
| Otu1052 | 0        | 0       | 8       | 2       | 0       | 0       | 0        | 0        | 0        | 0        | 0        | 3        | Bacteria; Proteobacteria; Alphaproteobacteria; Rickettsiales                                                      |
| Otu534  | 18       | 1       | 2       | 0       | 3       | 1       | 0        | 0        | 0        | 0        | 1        | 0        | Bacteria; Actinobacteria; Acidimicrobiia; Acidimicrobiales; C111                                                  |
| Otu535  | 21       | 3       | 5       | 13      | 2       | 4       | 6        | 7        | 7        | 3        | 2        | 2        | Bacteria; Planctomycetes; Phycisphaerae; WD2101                                                                   |
| Otu536  | 11       | 7       | 7       | 11      | 9       | 17      | 20       | 6        | 11       | 4        | 21       | 5        | Bacteria; Actinobacteria; Thermoleophilia; Solirubrobacteriales; Patulibacteraceae                                |
| Otu537  | 15       | 5       | 6       | 13      | 5       | 7       | 24       | 19       | 21       | 17       | 14       | 16       | Bacteria; Proteobacteria; Alphaproteobacteria; Rhodospirillales; Rhodospirillaceae                                |
| Otu1059 | 6        | 0       | 1       | 7       | 1       | 0       | 0        | 0        | 0        | 6        | 0        | 2        | Bacteria; Bacteroidetes; Cytophagia; Cytophagales; Cytophagaceae; Emticicia                                       |
| Otu1058 | 0        | 0       | 5       | 7       | 2       | 8       | 3        | 1        | 2        | 1        | 5        | 9        | Bacteria; Acidobacteria; Acidobacteriia; Acidobacteriales; Koribacteraceae; Candidatus_Koribacter                 |
| Otu532  | 8        | 1       | 9       | 21      | 8       | 3       | 27       | 13       | 8        | 12       | 15       | 10       | Bacteria; Actinobacteria; Thermoleophilia; Solirubrobacteriales; Patulibacteraceae                                |
| Otu533  | 21       | 3       | 1       | 4       | 2       | 1       | 12       | 1        | 2        | 7        | 9        | 0        | Bacteria; Proteobacteria; Gammaproteobacteria; Legionellales                                                      |
| Otu1297 | 1        | 5       | 0       | 9       | 4       | 1       | 2        | 6        | 3        | 8        | 10       | 6        | Bacteria; Bacteroidetes; Saprospirae; Saprospirales; Chitinophagaceae; Ferruginibacter; Ferruginibacter_lapsinans |

| #OTU ID | Z31DSO1r | Z31DSO2 | Z31DSO3 | Z31DSO4 | Z31DSO5 | Z31DSO6 | Z31J1DSO1 | Z31J1DSO2 | Z31J1DSO3 | Z31J1DSO4 | Z31J1DSO5 | Z31J1DSO6 | taxonomy                                                                                           |
|---------|----------|---------|---------|---------|---------|---------|-----------|-----------|-----------|-----------|-----------|-----------|----------------------------------------------------------------------------------------------------|
| Otu1296 | 3        | 2       | 2       | 6       | 0       | 2       | 8         | 7         | 3         | 4         | 0         | 2         | Bacteria; Proteobacteria; Deltaproteobacteria; Myxococcales; Haliangiaceae                         |
| Otu1295 | 10       | 0       | 8       | 9       | 3       | 8       | 6         | 6         | 6         | 4         | 12        | 8         | Bacteria; Acidobacteria; Chloracidobacteria                                                        |
| Otu1294 | 0        | 2       | 0       | 5       | 1       | 1       | 0         | 6         | 0         | 0         | 1         | 0         | Bacteria; Bacteroidetes; Sphingobacteriia; Sphingobacteriales                                      |
| Otu1293 | 1        | 2       | 3       | 0       | 2       | 8       | 1         | 8         | 5         | 1         | 1         | 1         | Bacteria; Proteobacteria; Deltaproteobacteria; Myxococcales                                        |
| Otu1292 | 20       | 4       | 67      | 25      | 8       | 13      | 11        | 2         | 24        | 24        | 10        | 30        | Bacteria; Bacteroidetes; Saprospirae; Saprospirales; Chitinophagaceae; Chitinophaga                |
| Otu1291 | 6        | 0       | 7       | 5       | 4       | 2       | 6         | 9         | 5         | 4         | 5         | 5         | Bacteria; Proteobacteria; Alphaproteobacteria; Rhodospirillales; Rhodospirillaceae                 |
| Otu1290 | 17       | 5       | 5       | 37      | 10      | 10      | 18        | 21        | 28        | 59        | 22        | 22        | Bacteria; Bacteroidetes; Saprospirae; Saprospirales; Chitinophagaceae; Flavisolibacter             |
| Otu1299 | 9        | 0       | 1       | 5       | 2       | 6       | 5         | 3         | 2         | 3         | 2         | 3         | Bacteria; Planctomycetes; Phycisphaerae; Phycisphaerales                                           |
| Otu1298 | 0        | 0       | 1       | 2       | 0       | 1       | 0         | 0         | 6         | 0         | 0         | 1         | Bacteria; Proteobacteria; Deltaproteobacteria; Sva0853; JTB36                                      |
| Otu2599 | 2        | 0       | 0       | 0       | 0       | 0       | 0         | 0         | 0         | 0         | 0         | 0         | Bacteria; Actinobacteria; Actinobacteria; Actinomycetales; Streptomycetaceae; Streptomyces         |
| Otu2598 | 0        | 0       | 0       | 0       | 0       | 3       | 0         | 0         | 0         | 0         | 0         | 0         | Bacteria; Proteobacteria; Gammaproteobacteria; Legionellales                                       |
| Otu2595 | 2        | 0       | 0       | 0       | 0       | 0       | 0         | 0         | 0         | 0         | 0         | 0         | Bacteria; Proteobacteria; Alphaproteobacteria; Rhizobiales; Brucellaceae                           |
| Otu2594 | 1        | 0       | 0       | 0       | 2       | 0       | 0         | 0         | 0         | 2         | 0         | 0         | Bacteria; Cyanobacteria; 4C0d-2; MLE1-12                                                           |
| Otu2597 | 2        | 0       | 0       | 0       | 0       | 0       | 0         | 0         | 0         | 0         | 0         | 0         | Bacteria; Cyanobacteria; Chloroplast; Euglenozoa                                                   |
| Otu2596 | 3        | 0       | 0       | 0       | 0       | 0       | 2         | 1         | 3         | 1         | 1         | 0         | Bacteria; Proteobacteria; Alphaproteobacteria; Caulobacteriales; Caulobacteraceae                  |
| Otu2591 | 6        | 2       | 0       | 0       | 0       | 0       | 0         | 0         | 0         | 0         | 0         | 0         | Bacteria; Gemmatimonadetes; Gemmatimonadetes; Ellin5290                                            |
| Otu2590 | 1        | 0       | 5       | 2       | 2       | 3       | 6         | 2         | 3         | 0         | 7         | 3         | Bacteria; Actinobacteria; Actinobacteria; Actinomycetales; Nocardioideae                           |
| Otu2593 | 45       | 24      | 13      | 40      | 13      | 21      | 39        | 27        | 34        | 29        | 22        | 24        | Bacteria; Acidobacteria; Acidobacteria-6; iii1-15                                                  |
| Otu2592 | 1        | 0       | 0       | 2       | 0       | 0       | 2         | 0         | 1         | 2         | 2         | 0         | Bacteria                                                                                           |
| Otu3482 | 0        | 1       | 1       | 1       | 1       | 3       | 2         | 0         | 0         | 1         | 1         | 0         | Bacteria                                                                                           |
| Otu2759 | 0        | 3       | 2       | 0       | 2       | 0       | 0         | 0         | 0         | 0         | 0         | 0         | Bacteria; Chloroflexi; Anaerolineae; GCA004                                                        |
| Otu2758 | 2        | 0       | 0       | 1       | 0       | 0       | 0         | 0         | 0         | 0         | 1         | 1         | Bacteria; Firmicutes; Clostridia; Clostridiales; Clostridiaceae; Clostridium; Clostridium_bowmanii |

| #OTU ID | Z31DSO1r | Z31DSO2 | Z31DSO3 | Z31DSO4 | Z31DSO5 | Z31DSO6 | Z31JDSO1 | Z31JDSO2 | Z31JDSO3 | Z31JDSO4 | Z31JDSO5 | Z31JDSO6 | taxonomy                                                                                                  |
|---------|----------|---------|---------|---------|---------|---------|----------|----------|----------|----------|----------|----------|-----------------------------------------------------------------------------------------------------------|
| Otu2757 | 2        | 0       | 1       | 2       | 0       | 3       | 4        | 0        | 2        | 1        | 1        | 0        | Bacteria; Actinobacteria; Actinobacteria; Actinomycetales; Geodermatophilaceae                            |
| Otu2756 | 0        | 3       | 1       | 2       | 1       | 1       | 3        | 0        | 0        | 0        | 3        | 0        | Bacteria; Acidobacteria; Acidobacteria-6; iii1-15                                                         |
| Otu2755 | 0        | 3       | 0       | 0       | 0       | 0       | 1        | 0        | 0        | 0        | 0        | 0        | Bacteria; Proteobacteria; Deltaproteobacteria; Syntrophobacterales; Syntrophobacteraceae; Syntrophobacter |
| Otu2754 | 0        | 0       | 0       | 1       | 1       | 1       | 0        | 0        | 0        | 1        | 3        | 0        | Bacteria; Verrucomicrobia; Spartobacteria; Chthoniobacterales; Chthoniobacteraceae                        |
| Otu2753 | 2        | 0       | 0       | 0       | 1       | 0       | 0        | 0        | 0        | 0        | 0        | 0        | Bacteria; Planctomycetes; Planctomycetia; Pirellulales; Pirellulaceae                                     |
| Otu2752 | 1        | 2       | 2       | 2       | 1       | 1       | 1        | 0        | 0        | 0        | 2        | 1        | Bacteria; Proteobacteria; Alphaproteobacteria; Rhodospirillales; Rhodospirillaceae; Azospirillum          |
| Otu2751 | 2        | 1       | 0       | 2       | 0       | 2       | 3        | 1        | 1        | 0        | 0        | 0        | Bacteria; Armatimonadetes; 0319-6E2                                                                       |
| Otu2750 | 4        | 2       | 1       | 2       | 2       | 0       | 1        | 3        | 0        | 1        | 0        | 0        | Bacteria; Acidobacteria; Acidobacteriia; Acidobacteriales                                                 |
| Otu2050 | 0        | 0       | 1       | 1       | 0       | 0       | 2        | 0        | 4        | 0        | 0        | 0        | Bacteria; Firmicutes; Bacilli; Bacillales; Planococcaceae; Ureibacillus                                   |
| Otu2051 | 0        | 0       | 4       | 1       | 3       | 5       | 0        | 0        | 0        | 0        | 1        | 0        | Bacteria; Proteobacteria; Alphaproteobacteria; Rickettsiales; mitochondria                                |
| Otu2052 | 2        | 3       | 4       | 5       | 4       | 0       | 2        | 0        | 0        | 0        | 1        | 0        | Bacteria; Planctomycetes; Planctomycetia; Planctomycetales; Planctomycetaceae; Planctomyces               |
| Otu3483 | 0        | 0       | 0       | 2       | 2       | 1       | 2        | 0        | 1        | 2        | 2        | 2        | Bacteria; OD1; SM2F11                                                                                     |
| Otu408  | 35       | 20      | 42      | 47      | 32      | 24      | 58       | 16       | 24       | 17       | 62       | 16       | Bacteria; Actinobacteria; Thermoleophilia; Solirubrobacterales; Solirubrobacteraceae                      |
| Otu409  | 36       | 14      | 21      | 56      | 23      | 14      | 37       | 15       | 30       | 50       | 55       | 19       | Bacteria; Bacteroidetes; Saprospirae; Saprospirales; Chitinophagaceae; Sediminibacterium                  |
| Otu1123 | 12       | 2       | 5       | 1       | 0       | 6       | 5        | 4        | 1        | 0        | 5        | 5        | Bacteria; Actinobacteria; Actinobacteria; Actinomycetales; Streptomycetaceae; Streptomyces                |
| Otu1122 | 6        | 2       | 2       | 4       | 0       | 0       | 7        | 2        | 1        | 1        | 6        | 3        | Bacteria; Planctomycetes; Phycisphaerae; WD2101                                                           |
| Otu1125 | 10       | 1       | 2       | 7       | 2       | 7       | 8        | 5        | 3        | 4        | 6        | 3        | Bacteria; Planctomycetes; Planctomycetia; Gemmatales; Gemmataceae; Gemmata                                |
| Otu1124 | 0        | 3       | 15      | 1       | 2       | 1       | 3        | 0        | 0        | 0        | 7        | 1        | Bacteria; Proteobacteria; Deltaproteobacteria; Myxococcales                                               |
| Otu1127 | 6        | 1       | 4       | 3       | 2       | 2       | 7        | 0        | 3        | 2        | 8        | 0        | Bacteria                                                                                                  |
| Otu1126 | 4        | 2       | 1       | 2       | 1       | 1       | 2        | 0        | 2        | 8        | 0        | 0        | Bacteria; Proteobacteria; Gammaproteobacteria; Legionellales; Coxiellaceae; Aquicella                     |
| Otu1129 | 0        | 2       | 0       | 2       | 0       | 0       | 1        | 0        | 0        | 0        | 7        | 0        | Bacteria; Cyanobacteria; Nostocophycideae; Nostocales; Nostocaceae                                        |
| Otu1128 | 10       | 1       | 3       | 5       | 3       | 3       | 7        | 7        | 9        | 5        | 10       | 2        | Bacteria; Actinobacteria; Acidimicrobiia; Acidimicrobiales                                                |

| #OTU ID | Z31DSO1r | Z31DSO2 | Z31DSO3 | Z31DSO4 | Z31DSO5 | Z31DSO6 | Z31JDSO1 | Z31JDSO2 | Z31JDSO3 | Z31JDSO4 | Z31JDSO5 | Z31JDSO6 | taxonomy                                                                                                            |
|---------|----------|---------|---------|---------|---------|---------|----------|----------|----------|----------|----------|----------|---------------------------------------------------------------------------------------------------------------------|
| Otu402  | 14       | 11      | 28      | 27      | 13      | 14      | 27       | 20       | 29       | 22       | 41       | 11       | Bacteria; Bacteroidetes; Saprospirae; Saprospirales; Chitinophagaceae; Segetibacter                                 |
| Otu403  | 51       | 19      | 21      | 24      | 22      | 11      | 34       | 11       | 13       | 21       | 25       | 13       | Bacteria; Proteobacteria; Alphaproteobacteria; Rhodospirillales; Rhodospirillaceae                                  |
| Otu404  | 11       | 7       | 9       | 28      | 8       | 12      | 16       | 13       | 18       | 18       | 18       | 16       | Bacteria; Verrucomicrobia; Pedosphaerae; Pedosphaerales; Ellin517                                                   |
| Otu405  | 55       | 28      | 29      | 38      | 25      | 13      | 13       | 4        | 4        | 49       | 43       | 12       | Bacteria; Verrucomicrobia; Spartobacteria; Chthoniobacterales; Chthoniobacteraceae                                  |
| Otu406  | 8        | 1       | 3       | 25      | 6       | 2       | 12       | 18       | 25       | 1        | 14       | 2        | Bacteria; Armatimonadetes; Chthonomonadetes; Chthonomonadales; Chthonomonadaceae                                    |
| Otu407  | 0        | 0       | 9       | 32      | 1       | 20      | 1        | 0        | 0        | 0        | 0        | 0        | Bacteria; Proteobacteria; Betaproteobacteria; Burkholderiales; Burkholderiaceae                                     |
| Otu660  | 0        | 1       | 17      | 3       | 2       | 13      | 9        | 3        | 1        | 0        | 5        | 0        | Bacteria; Actinobacteria; Actinobacteria; Actinomycetales; Streptosporangiaceae; Streptosporangium                  |
| Otu661  | 7        | 0       | 0       | 21      | 5       | 3       | 0        | 2        | 5        | 24       | 4        | 22       | Bacteria; Proteobacteria; Gammaproteobacteria; Xanthomonadales; Sinobacteraceae; Nevskia; Nevskia_ramosa            |
| Otu662  | 91       | 30      | 18      | 36      | 30      | 27      | 20       | 15       | 12       | 31       | 28       | 17       | Bacteria; Acidobacteria; Acidobacteria-6; iii1-15                                                                   |
| Otu663  | 2        | 3       | 14      | 11      | 0       | 9       | 6        | 5        | 13       | 4        | 4        | 5        | Bacteria; Armatimonadetes; Fimbriimonadia; Fimbriimonadales; Fimbriimonadaceae; Fimbriimonas                        |
| Otu664  | 8        | 3       | 4       | 9       | 2       | 9       | 3        | 1        | 7        | 13       | 7        | 8        | Bacteria                                                                                                            |
| Otu665  | 12       | 5       | 8       | 12      | 2       | 3       | 8        | 10       | 0        | 8        | 5        | 5        | Bacteria; Proteobacteria; Gammaproteobacteria; Legionellales                                                        |
| Otu666  | 17       | 4       | 7       | 5       | 2       | 3       | 11       | 3        | 6        | 12       | 2        | 1        | Bacteria; Proteobacteria; Alphaproteobacteria; Rhodospirillales; Rhodospirillaceae                                  |
| Otu667  | 0        | 0       | 0       | 18      | 0       | 15      | 0        | 3        | 1        | 1        | 3        | 1        | Bacteria; Chloroflexi; Ktedonobacteria                                                                              |
| Otu884  | 4        | 3       | 12      | 1       | 1       | 1       | 0        | 1        | 10       | 3        | 5        | 3        | Bacteria; Verrucomicrobia; Verrucomicrobiae; Verrucomicrobiales; Verrucomicrobiaceae                                |
| Otu885  | 0        | 1       | 1       | 10      | 3       | 2       | 9        | 2        | 0        | 2        | 5        | 1        | Bacteria                                                                                                            |
| Otu886  | 6        | 5       | 3       | 9       | 11      | 18      | 1        | 0        | 4        | 3        | 10       | 6        | Bacteria; Bacteroidetes; Saprospirae; Saprospirales; Chitinophagaceae                                               |
| Otu887  | 0        | 0       | 0       | 3       | 0       | 0       | 1        | 0        | 1        | 14       | 2        | 0        | Bacteria; Cyanobacteria; Chloroplast; Stramenopiles                                                                 |
| Otu880  | 11       | 2       | 3       | 1       | 3       | 0       | 2        | 4        | 8        | 3        | 5        | 3        | Bacteria; Chlamydiae; Chlamydia; Chlamydiales; Rhabdochlamydiaceae; Candidatus_Rhabdochlamydia                      |
| Otu881  | 6        | 0       | 7       | 15      | 3       | 6       | 9        | 3        | 10       | 5        | 11       | 3        | Bacteria; Gemmatimonadetes; Gemm-5                                                                                  |
| Otu882  | 7        | 6       | 19      | 19      | 9       | 13      | 25       | 11       | 5        | 5        | 28       | 10       | Bacteria; Actinobacteria; Actinobacteria; Actinomycetales; Intrasporangiaceae; Oryzihumus; Oryzihumus_leptocrescens |
| Otu883  | 16       | 3       | 3       | 1       | 3       | 14      | 2        | 2        | 2        | 42       | 11       | 19       | Bacteria; Gemmatimonadetes; Gemmatimonadetes; N1423WL                                                               |

| #OTU ID | Z31DSO1r | Z31DSO2 | Z31DSO3 | Z31DSO4 | Z31DSO5 | Z31DSO6 | Z31JDSO1 | Z31JDSO2 | Z31JDSO3 | Z31JDSO4 | Z31JDSO5 | Z31JDSO6 | taxonomy                                                                                                                 |
|---------|----------|---------|---------|---------|---------|---------|----------|----------|----------|----------|----------|----------|--------------------------------------------------------------------------------------------------------------------------|
| Otu390  | 1        | 0       | 1       | 1       | 2       | 4       | 4        | 2        | 0        | 31       | 0        | 2        | Bacteria; Bacteroidetes; Saprospirae; Saprospirales; Chitinophagaceae                                                    |
| Otu391  | 17       | 14      | 11      | 17      | 6       | 8       | 10       | 10       | 15       | 12       | 25       | 10       | Bacteria; Gemmatimonadetes; Gemm-5                                                                                       |
| Otu392  | 40       | 16      | 4       | 5       | 3       | 2       | 4        | 4        | 2        | 11       | 6        | 4        | Bacteria; Proteobacteria; Deltaproteobacteria; Myxococcales; Haliangiaceae                                               |
| Otu393  | 50       | 22      | 14      | 37      | 14      | 22      | 42       | 32       | 36       | 31       | 23       | 25       | Bacteria; Proteobacteria; Alphaproteobacteria; Rhodospirillales; Rhodospirillaceae                                       |
| Otu394  | 25       | 25      | 7       | 29      | 24      | 16      | 2        | 4        | 7        | 33       | 29       | 2        | Bacteria; Bacteroidetes; Sphingobacteriia; Sphingobacteriales                                                            |
| Otu395  | 12       | 20      | 19      | 19      | 24      | 34      | 3        | 4        | 9        | 12       | 19       | 5        | Bacteria; Chloroflexi; Anaerolineae; H39                                                                                 |
| Otu396  | 92       | 44      | 22      | 64      | 25      | 11      | 94       | 64       | 53       | 62       | 63       | 59       | Bacteria; Gemmatimonadetes; Gemmatimonadetes; Gemmatimonadales; Ellin5301                                                |
| Otu397  | 27       | 3       | 2       | 2       | 1       | 4       | 0        | 0        | 0        | 6        | 9        | 1        | Bacteria; Verrucomicrobia; Pedosphaerae; Pedosphaerales; auto67_4W                                                       |
| Otu398  | 33       | 3       | 10      | 22      | 8       | 11      | 20       | 16       | 19       | 24       | 18       | 12       | Bacteria; Gemmatimonadetes; Gemmatimonadetes; KD8-87                                                                     |
| Otu399  | 49       | 21      | 2       | 16      | 2       | 12      | 5        | 9        | 28       | 16       | 16       | 17       | Bacteria; Bacteroidetes; Cytophagia; Cytophagales; Cytophagaceae                                                         |
| Otu2263 | 2        | 0       | 0       | 0       | 0       | 0       | 0        | 0        | 0        | 0        | 0        | 0        | Bacteria                                                                                                                 |
| Otu3485 | 0        | 2       | 0       | 0       | 0       | 0       | 0        | 1        | 0        | 0        | 1        | 0        | Bacteria; Chlamydiae; Chlamydiia; Chlamydiales; Parachlamydiaceae                                                        |
| Otu714  | 3        | 11      | 3       | 6       | 8       | 10      | 6        | 11       | 12       | 3        | 5        | 1        | Bacteria; Chloroflexi; Anaerolineae; WCHB1-50                                                                            |
| Otu715  | 7        | 11      | 4       | 1       | 4       | 1       | 2        | 2        | 1        | 0        | 7        | 1        | Bacteria; Verrucomicrobia; Pedosphaerae; Pedosphaerales                                                                  |
| Otu716  | 3        | 7       | 10      | 17      | 4       | 26      | 17       | 21       | 35       | 1        | 4        | 17       | Bacteria; Proteobacteria; Alphaproteobacteria; Ellin329                                                                  |
| Otu717  | 77       | 22      | 40      | 21      | 44      | 18      | 32       | 14       | 17       | 21       | 66       | 17       | Bacteria; Verrucomicrobia; Pedosphaerae; Pedosphaerales                                                                  |
| Otu710  | 1        | 1       | 4       | 21      | 0       | 1       | 4        | 6        | 6        | 4        | 0        | 2        | Bacteria; Bacteroidetes; Sphingobacteriia; Sphingobacteriales; Sphingobacteriaceae                                       |
| Otu711  | 2        | 2       | 4       | 5       | 1       | 2       | 4        | 2        | 4        | 3        | 16       | 1        | Bacteria; Proteobacteria; Deltaproteobacteria; Myxococcales                                                              |
| Otu712  | 20       | 4       | 5       | 4       | 5       | 11      | 5        | 3        | 8        | 3        | 17       | 2        | Bacteria; Actinobacteria; Acidimicrobia; Acidimicrobiales; EB1017                                                        |
| Otu713  | 0        | 12      | 5       | 19      | 3       | 4       | 0        | 4        | 11       | 1        | 1        | 3        | Bacteria; Proteobacteria; Alphaproteobacteria; Rickettsiales                                                             |
| Otu248  | 70       | 82      | 28      | 41      | 40      | 14      | 27       | 9        | 2        | 21       | 55       | 9        | Bacteria; Acidobacteria; Chloracidobacteria; RB41; Ellin6075                                                             |
| Otu249  | 87       | 17      | 18      | 17      | 10      | 7       | 41       | 13       | 7        | 21       | 8        | 19       | Bacteria; Proteobacteria; Alphaproteobacteria; Sphingomonadales; Sphingomonadaceae; Sphingomonas; Sphingomonas_wittichii |



| #OTU ID | Z31DSO1r | Z31DSO2 | Z31DSO3 | Z31DSO4 | Z31DSO5 | Z31DSO6 | Z31J1DSO1 | Z31J1DSO2 | Z31J1DSO3 | Z31J1DSO4 | Z31J1DSO5 | Z31J1DSO6 | taxonomy                                                                                           |
|---------|----------|---------|---------|---------|---------|---------|-----------|-----------|-----------|-----------|-----------|-----------|----------------------------------------------------------------------------------------------------|
| Otu718  | 11       | 5       | 2       | 3       | 3       | 0       | 7         | 0         | 1         | 5         | 9         | 2         | Bacteria; Proteobacteria; Betaproteobacteria                                                       |
| Otu719  | 3        | 0       | 2       | 17      | 2       | 0       | 1         | 2         | 4         | 4         | 3         | 1         | Bacteria; Bacteroidetes; Saprospirae; Saprospirales; Chitinophagaceae                              |
| Otu1873 | 0        | 0       | 2       | 1       | 2       | 2       | 5         | 0         | 3         | 3         | 4         | 0         | Bacteria; Actinobacteria; Acidimicrobia; Acidimicrobiales                                          |
| Otu1872 | 3        | 1       | 0       | 0       | 0       | 0       | 0         | 0         | 0         | 1         | 0         | 0         | Bacteria; Armatimonadetes; Armatimonadia; Armatimonadales; Armatimonadaceae                        |
| Otu1871 | 1        | 2       | 1       | 3       | 2       | 1       | 4         | 1         | 2         | 2         | 4         | 2         | Bacteria; Firmicutes; Clostridia; OPB54                                                            |
| Otu1870 | 0        | 0       | 0       | 6       | 0       | 1       | 0         | 0         | 3         | 0         | 4         | 0         | Bacteria; Proteobacteria; Alphaproteobacteria; Rhizobiales                                         |
| Otu1877 | 2        | 1       | 2       | 3       | 1       | 1       | 0         | 1         | 0         | 1         | 4         | 0         | Bacteria; Actinobacteria; Actinobacteria; Actinomycetales; Nocardioideae                           |
| Otu1876 | 1        | 0       | 1       | 3       | 0       | 0       | 0         | 1         | 0         | 0         | 0         | 0         | Bacteria; Planctomycetes; Planctomycetia; Gemmatales; Gemmataceae; Gemmata                         |
| Otu1875 | 1        | 0       | 1       | 3       | 1       | 1       | 1         | 0         | 2         | 0         | 1         | 0         | Bacteria                                                                                           |
| Otu1874 | 4        | 0       | 1       | 0       | 0       | 0       | 1         | 0         | 0         | 0         | 0         | 0         | Bacteria; Cyanobacteria; 4C0d-2; SM1D11                                                            |
| Otu1879 | 4        | 1       | 3       | 0       | 1       | 1       | 1         | 0         | 0         | 1         | 2         | 1         | Bacteria; Verrucomicrobia; Spartobacteria; Chthoniobacteriales; Chthoniobacteraceae; OR-59         |
| Otu1878 | 3        | 0       | 0       | 0       | 0       | 0       | 0         | 0         | 1         | 0         | 0         | 0         | Bacteria; TM7; TM7-1                                                                               |
| Otu2290 | 0        | 0       | 1       | 3       | 1       | 0       | 2         | 2         | 2         | 3         | 2         | 0         | Bacteria; Proteobacteria; Deltaproteobacteria; Bdellovibrionales; Bdellovibrionaceae; Bdellovibrio |
| Otu2375 | 0        | 2       | 0       | 0       | 0       | 0       | 0         | 0         | 0         | 0         | 0         | 0         | Bacteria                                                                                           |
| Otu2374 | 0        | 0       | 0       | 0       | 2       | 0       | 0         | 1         | 0         | 1         | 2         | 1         | Bacteria; Firmicutes; Bacilli; Bacillales; Paenibacillaceae                                        |
| Otu2377 | 0        | 0       | 0       | 0       | 1       | 0       | 1         | 0         | 0         | 2         | 3         | 0         | Bacteria                                                                                           |
| Otu2291 | 0        | 0       | 0       | 1       | 0       | 0       | 0         | 0         | 0         | 0         | 0         | 3         | Bacteria; Armatimonadetes; Armatimonadia; Armatimonadales; Armatimonadaceae                        |
| Otu2371 | 0        | 0       | 0       | 0       | 0       | 0       | 0         | 0         | 0         | 0         | 2         | 0         | Bacteria                                                                                           |
| Otu2370 | 2        | 1       | 1       | 1       | 1       | 1       | 0         | 1         | 0         | 4         | 1         | 4         | Bacteria; Proteobacteria; Gammaproteobacteria; Xanthomonadales; Sinobacteraceae; Nevskia           |
| Otu2373 | 0        | 0       | 0       | 0       | 0       | 1       | 0         | 0         | 2         | 0         | 0         | 0         | Bacteria                                                                                           |
| Otu2372 | 0        | 1       | 2       | 2       | 2       | 1       | 2         | 1         | 1         | 3         | 1         | 0         | Bacteria                                                                                           |
| Otu2296 | 1        | 0       | 2       | 4       | 0       | 1       | 2         | 0         | 3         | 2         | 4         | 0         | Bacteria; Planctomycetes; Planctomycetia; Gemmatales; Isosphaeraceae                               |

| #OTU ID | Z31DSO1r | Z31DSO2 | Z31DSO3 | Z31DSO4 | Z31DSO5 | Z31DSO6 | Z31JDSO1 | Z31JDSO2 | Z31JDSO3 | Z31JDSO4 | Z31JDSO5 | Z31JDSO6 | taxonomy                                                                                          |
|---------|----------|---------|---------|---------|---------|---------|----------|----------|----------|----------|----------|----------|---------------------------------------------------------------------------------------------------|
| Otu2379 | 1        | 2       | 0       | 1       | 0       | 0       | 1        | 0        | 1        | 0        | 2        | 1        | Bacteria; Proteobacteria; Deltaproteobacteria; Myxococcales                                       |
| Otu2378 | 2        | 0       | 2       | 0       | 0       | 0       | 4        | 1        | 2        | 1        | 1        | 1        | Bacteria; Proteobacteria; Alphaproteobacteria; Rhodospirillales; Rhodospirillaceae                |
| Otu2297 | 0        | 0       | 1       | 0       | 1       | 1       | 3        | 1        | 5        | 3        | 1        | 2        | Bacteria; Firmicutes; Bacilli; Bacillales                                                         |
| Otu2577 | 2        | 0       | 1       | 0       | 0       | 0       | 0        | 0        | 0        | 0        | 0        | 0        | Bacteria; Actinobacteria; Rubrobacteria; Rubrobacteriales; Rubrobacteraceae; Rubrobacter          |
| Otu2576 | 0        | 0       | 0       | 3       | 1       | 0       | 1        | 1        | 0        | 0        | 1        | 1        | Bacteria; Cyanobacteria; Chloroplast; Chlorophyta; Chlamydomonadaceae                             |
| Otu2575 | 2        | 0       | 0       | 0       | 0       | 0       | 0        | 0        | 0        | 0        | 0        | 0        | Bacteria                                                                                          |
| Otu2574 | 5        | 0       | 0       | 0       | 0       | 0       | 0        | 0        | 0        | 0        | 0        | 0        | Bacteria; Armatimonadetes; Chthonomonadetes; Chthonomonadales; Chthonomonadaceae                  |
| Otu2573 | 30       | 17      | 54      | 57      | 19      | 90      | 84       | 62       | 85       | 64       | 39       | 80       | Bacteria; Acidobacteria; Acidobacteriia; Acidobacteriales; Koribacteraceae; Candidatus_Koribacter |
| Otu2294 | 0        | 0       | 1       | 1       | 0       | 2       | 3        | 3        | 2        | 2        | 1        | 2        | Bacteria; Proteobacteria; Alphaproteobacteria; BD7-3                                              |
| Otu2571 | 0        | 0       | 0       | 2       | 0       | 0       | 0        | 0        | 0        | 0        | 0        | 0        | Bacteria                                                                                          |
| Otu2570 | 0        | 0       | 0       | 0       | 0       | 0       | 0        | 0        | 0        | 3        | 0        | 0        | Bacteria; Gemmatimonadetes; Gemmatimonadetes; Ellin5290                                           |
| Otu2295 | 0        | 0       | 2       | 2       | 2       | 2       | 0        | 0        | 1        | 0        | 2        | 1        | Bacteria; TM7; SC3                                                                                |
| Otu2579 | 0        | 0       | 2       | 0       | 0       | 0       | 0        | 0        | 0        | 0        | 0        | 0        | Bacteria; Chloroflexi; Chloroflexi; Herpetosiphonales                                             |
| Otu2578 | 0        | 0       | 0       | 0       | 0       | 0       | 0        | 0        | 0        | 1        | 2        | 0        | Bacteria; Firmicutes; Bacilli; Bacillales                                                         |
| Otu2111 | 0        | 1       | 1       | 1       | 0       | 1       | 1        | 0        | 3        | 2        | 1        | 8        | Bacteria; Bacteroidetes; Cytophagia; Cytophagales; Cytophagaceae; Sporocytophaga                  |
| Otu2110 | 2        | 2       | 1       | 0       | 1       | 1       | 1        | 0        | 0        | 0        | 3        | 0        | Bacteria; Actinobacteria; MB-A2-108; 0319-7L14                                                    |
| Otu2113 | 7        | 6       | 6       | 2       | 2       | 2       | 9        | 2        | 0        | 7        | 4        | 1        | Bacteria; Gemmatimonadetes; Gemmatimonadetes                                                      |
| Otu2112 | 8        | 7       | 11      | 13      | 10      | 28      | 8        | 17       | 20       | 32       | 13       | 17       | Bacteria; Verrucomicrobia; Spartobacteria; Chthoniobacteriales; Chthoniobacteraceae; DA101        |
| Otu2115 | 8        | 4       | 4       | 13      | 2       | 9       | 17       | 14       | 13       | 10       | 3        | 16       | Bacteria; Acidobacteria; Acidobacteriia; Acidobacteriales; Acidobacteriaceae                      |
| Otu2114 | 3        | 0       | 2       | 2       | 1       | 5       | 3        | 4        | 3        | 4        | 2        | 2        | Bacteria; Planctomycetes; Planctomycetia; Gemmatales; Gemmataceae                                 |
| Otu3343 | 0        | 0       | 1       | 2       | 0       | 0       | 1        | 1        | 0        | 0        | 0        | 0        | Bacteria; Proteobacteria; Gammaproteobacteria                                                     |
| Otu3342 | 2        | 0       | 4       | 1       | 2       | 1       | 0        | 0        | 1        | 1        | 4        | 0        | Bacteria; Verrucomicrobia; Opitutae; Opitutales; Opitutaceae                                      |

| #OTU ID | Z31DSO1r | Z31DSO2 | Z31DSO3 | Z31DSO4 | Z31DSO5 | Z31DSO6 | Z31JDSO1 | Z31JDSO2 | Z31JDSO3 | Z31JDSO4 | Z31JDSO5 | Z31JDSO6 | taxonomy                                                                                        |
|---------|----------|---------|---------|---------|---------|---------|----------|----------|----------|----------|----------|----------|-------------------------------------------------------------------------------------------------|
| Otu2218 | 4        | 0       | 0       | 0       | 1       | 0       | 0        | 0        | 0        | 0        | 0        | 0        | Bacteria; Verrucomicrobia; Verrucomicrobiae; Verrucomicrobiales; Verrucomicrobiaceae            |
| Otu2219 | 0        | 0       | 3       | 1       | 1       | 3       | 2        | 0        | 5        | 4        | 0        | 3        | Bacteria; Armatimonadetes; Fimbriimonadia; Fimbriimonadales; Fimbriimonadaceae; Fimbriimonas    |
| Otu3347 | 0        | 0       | 0       | 0       | 0       | 0       | 0        | 0        | 0        | 2        | 0        | 0        | Bacteria                                                                                        |
| Otu2117 | 4        | 1       | 0       | 0       | 2       | 0       | 2        | 1        | 0        | 3        | 1        | 0        | Bacteria; Bacteroidetes; At12OctB3                                                              |
| Otu1909 | 3        | 0       | 0       | 0       | 1       | 1       | 0        | 0        | 0        | 0        | 0        | 0        | Bacteria; Chlamydiae; Chlamydia; Chlamydiales                                                   |
| Otu1908 | 0        | 0       | 0       | 0       | 0       | 0       | 0        | 0        | 0        | 0        | 3        | 0        | Bacteria; Proteobacteria; Deltaproteobacteria                                                   |
| Otu1907 | 1        | 0       | 1       | 3       | 0       | 1       | 1        | 1        | 0        | 3        | 1        | 2        | Bacteria; Bacteroidetes; Saprospirae; Saprospirales; Chitinophagaceae                           |
| Otu1906 | 4        | 1       | 0       | 0       | 0       | 0       | 1        | 0        | 0        | 1        | 1        | 0        | Bacteria; Verrucomicrobia                                                                       |
| Otu1905 | 1        | 0       | 0       | 0       | 0       | 0       | 0        | 0        | 0        | 0        | 4        | 0        | Bacteria; Armatimonadetes; Chthonomonadetes; Chthonomonadales; Chthonomonadaceae; Chthonomonas  |
| Otu1904 | 1        | 3       | 3       | 1       | 2       | 0       | 0        | 0        | 5        | 1        | 4        | 0        | Bacteria; Gemmatimonadetes; Gemm-1                                                              |
| Otu1903 | 0        | 0       | 0       | 0       | 3       | 0       | 0        | 0        | 1        | 0        | 2        | 0        | Bacteria; Armatimonadetes; Fimbriimonadia; Fimbriimonadales; Fimbriimonadaceae; Fimbriimonas    |
| Otu1902 | 1        | 0       | 1       | 1       | 6       | 0       | 0        | 1        | 2        | 2        | 1        | 1        | Bacteria; Proteobacteria; Alphaproteobacteria; Rickettsiales; mitochondria                      |
| Otu1901 | 5        | 2       | 4       | 1       | 2       | 2       | 1        | 0        | 0        | 0        | 0        | 0        | Bacteria; Gemmatimonadetes; Gemmatimonadetes; Ellin5290                                         |
| Otu1900 | 1        | 8       | 3       | 8       | 11      | 6       | 3        | 5        | 14       | 6        | 0        | 13       | Bacteria; Verrucomicrobia; Pedosphaerae; Pedosphaerales; auto67_4W                              |
| Otu866  | 13       | 9       | 7       | 21      | 4       | 14      | 17       | 16       | 13       | 27       | 13       | 11       | Bacteria; Bacteroidetes; Sphingobacteria; Sphingobacteriales                                    |
| Otu867  | 4        | 7       | 4       | 9       | 7       | 9       | 1        | 3        | 7        | 4        | 2        | 2        | Bacteria; Proteobacteria; Betaproteobacteria; MND1                                              |
| Otu864  | 8        | 3       | 9       | 6       | 0       | 9       | 13       | 6        | 14       | 8        | 14       | 4        | Bacteria; Planctomycetes; Planctomycetia; Gemmatales; Gemmataceae                               |
| Otu865  | 0        | 0       | 1       | 1       | 0       | 0       | 2        | 0        | 1        | 10       | 3        | 1        | Bacteria; Bacteroidetes; Sphingobacteria; Sphingobacteriales                                    |
| Otu862  | 1        | 8       | 5       | 6       | 4       | 5       | 5        | 3        | 6        | 2        | 9        | 6        | Bacteria; Acidobacteria; Chloracidobacteria; Ellin7246                                          |
| Otu863  | 5        | 0       | 3       | 0       | 0       | 3       | 8        | 7        | 2        | 0        | 2        | 1        | Bacteria; Chlamydiae; Chlamydia; Chlamydiales                                                   |
| Otu860  | 11       | 1       | 6       | 2       | 0       | 0       | 3        | 0        | 0        | 0        | 1        | 0        | Bacteria; Bacteroidetes; Saprospirae; Saprospirales; Chitinophagaceae; Chitinophaga             |
| Otu861  | 10       | 0       | 0       | 0       | 0       | 0       | 0        | 0        | 0        | 0        | 0        | 0        | Bacteria; Proteobacteria; Gammaproteobacteria; Xanthomonadales; Sinobacteraceae; Steroidobacter |

| #OTU ID | Z31DSO1r | Z31DSO2 | Z31DSO3 | Z31DSO4 | Z31DSO5 | Z31DSO6 | Z31JDSO1 | Z31JDSO2 | Z31JDSO3 | Z31JDSO4 | Z31JDSO5 | Z31JDSO6 | taxonomy                                                                                   |
|---------|----------|---------|---------|---------|---------|---------|----------|----------|----------|----------|----------|----------|--------------------------------------------------------------------------------------------|
| Otu2408 | 2        | 0       | 0       | 0       | 0       | 0       | 0        | 0        | 0        | 0        | 0        | 0        | Bacteria; Proteobacteria; Gammaproteobacteria; Legionellales; Legionellaceae               |
| Otu3189 | 0        | 0       | 0       | 2       | 0       | 1       | 1        | 0        | 1        | 1        | 1        | 2        | Bacteria; Chlamydiae; Chlamydia; Chlamydiales                                              |
| Otu3188 | 0        | 0       | 0       | 1       | 1       | 0       | 1        | 2        | 2        | 0        | 3        | 0        | Bacteria                                                                                   |
| Otu868  | 7        | 7       | 4       | 3       | 5       | 5       | 8        | 14       | 8        | 6        | 3        | 6        | Bacteria; Proteobacteria; Gammaproteobacteria                                              |
| Otu869  | 5        | 2       | 0       | 7       | 0       | 13      | 11       | 4        | 5        | 2        | 2        | 1        | Bacteria; Acidobacteria; iii1-8; 32-20                                                     |
| Otu3006 | 2        | 0       | 0       | 0       | 0       | 0       | 0        | 0        | 0        | 0        | 0        | 0        | Bacteria                                                                                   |
| Otu2106 | 0        | 0       | 1       | 0       | 0       | 1       | 0        | 0        | 0        | 3        | 0        | 0        | Bacteria; Proteobacteria; Gammaproteobacteria; Legionellales; Coxiellaceae; Aquicella      |
| Otu2107 | 0        | 0       | 1       | 4       | 0       | 1       | 4        | 0        | 4        | 3        | 3        | 2        | Bacteria; Actinobacteria; Actinobacteria; Actinomycetales; Nocardioideae                   |
| Otu2104 | 1        | 0       | 1       | 4       | 0       | 1       | 1        | 0        | 0        | 2        | 2        | 0        | Bacteria; Verrucomicrobia; Spartobacteria; Chthoniobacteriales; Chthoniobacteraceae        |
| Otu2105 | 0        | 5       | 0       | 0       | 2       | 0       | 0        | 0        | 0        | 0        | 0        | 0        | Bacteria; Proteobacteria; Alphaproteobacteria; Rhodobacteriales; Hyphomonadaceae           |
| Otu2102 | 1        | 1       | 0       | 0       | 0       | 0       | 4        | 0        | 1        | 1        | 4        | 0        | Bacteria; Planctomycetes; Planctomycetia; Gemmatales; Gemmataceae; Gemmata                 |
| Otu2103 | 5        | 3       | 0       | 1       | 2       | 0       | 0        | 0        | 0        | 0        | 1        | 0        | Bacteria; Actinobacteria; Acidimicrobia; Acidimicrobiales                                  |
| Otu2100 | 0        | 0       | 0       | 2       | 1       | 3       | 4        | 0        | 0        | 1        | 4        | 0        | Bacteria; Actinobacteria; Actinobacteria; Actinomycetales; Cellulomonadaceae; Cellulomonas |
| Otu2101 | 4        | 0       | 1       | 1       | 2       | 0       | 0        | 0        | 0        | 0        | 3        | 0        | Bacteria; Planctomycetes; Phycisphaerae; Phycisphaerales; Phycisphaeraeae                  |
| Otu2108 | 35       | 8       | 23      | 39      | 11      | 23      | 27       | 22       | 26       | 32       | 43       | 25       | Bacteria; Acidobacteria; Acidobacteriia; Acidobacteriales; Koribacteraceae                 |
| Otu2109 | 0        | 0       | 0       | 0       | 0       | 0       | 1        | 3        | 0        | 0        | 0        | 0        | Bacteria; Proteobacteria; Gammaproteobacteria                                              |
| Otu1619 | 2        | 1       | 5       | 11      | 3       | 5       | 7        | 2        | 2        | 4        | 4        | 1        | Bacteria; Proteobacteria; Deltaproteobacteria; Myxococcales                                |
| Otu1618 | 4        | 2       | 5       | 0       | 0       | 0       | 0        | 0        | 0        | 3        | 0        | 1        | Bacteria; Bacteroidetes                                                                    |
| Otu1613 | 4        | 0       | 2       | 1       | 1       | 1       | 0        | 1        | 1        | 4        | 2        | 1        | Bacteria; Proteobacteria                                                                   |
| Otu1612 | 0        | 2       | 2       | 5       | 3       | 4       | 7        | 2        | 3        | 1        | 2        | 1        | Bacteria; Proteobacteria; Alphaproteobacteria; Rhizobiales; Methylocystaceae               |
| Otu1611 | 0        | 1       | 2       | 1       | 2       | 2       | 7        | 1        | 2        | 2        | 3        | 0        | Bacteria; Planctomycetes; Planctomycetia; Gemmatales; Gemmataceae                          |
| Otu1610 | 5        | 0       | 2       | 0       | 1       | 2       | 0        | 4        | 4        | 3        | 1        | 0        | Bacteria; FBP                                                                              |

| #OTU ID | Z31DSO1r | Z31DSO2 | Z31DSO3 | Z31DSO4 | Z31DSO5 | Z31DSO6 | Z31JDSO1 | Z31JDSO2 | Z31JDSO3 | Z31JDSO4 | Z31JDSO5 | Z31JDSO6 | taxonomy                                                                                               |
|---------|----------|---------|---------|---------|---------|---------|----------|----------|----------|----------|----------|----------|--------------------------------------------------------------------------------------------------------|
| Otu1617 | 8        | 2       | 2       | 0       | 3       | 0       | 1        | 0        | 0        | 0        | 2        | 0        | Bacteria; Proteobacteria; Deltaproteobacteria; Myxococcales; OM27                                      |
| Otu1616 | 3        | 1       | 6       | 13      | 1       | 3       | 8        | 3        | 7        | 2        | 14       | 4        | Bacteria; Proteobacteria; Gammaproteobacteria; Legionellales; Coxiellaceae                             |
| Otu1615 | 0        | 1       | 0       | 0       | 0       | 1       | 5        | 0        | 0        | 14       | 0        | 0        | Bacteria; Proteobacteria; Alphaproteobacteria; Sphingomonadales; Sphingomonadaceae; Sphingopyxis       |
| Otu1614 | 0        | 0       | 1       | 1       | 0       | 0       | 4        | 0        | 2        | 1        | 2        | 0        | Bacteria; Chloroflexi; Ktedonobacteria; JG30-KF-AS9                                                    |
| Otu3291 | 0        | 0       | 0       | 1       | 0       | 0       | 2        | 0        | 0        | 0        | 0        | 0        | Bacteria; Planctomycetes; Planctomycetia; Gemmatales; Gemmataceae; Gemmata                             |
| Otu3290 | 0        | 0       | 2       | 0       | 0       | 1       | 0        | 0        | 0        | 0        | 0        | 0        | Bacteria; Proteobacteria; Alphaproteobacteria; Rickettsiales                                           |
| Otu3293 | 1        | 0       | 1       | 0       | 0       | 2       | 0        | 0        | 0        | 0        | 0        | 1        | Bacteria; Actinobacteria; Thermoleophilia; Solirubrobacterales                                         |
| Otu3292 | 0        | 1       | 0       | 5       | 0       | 0       | 2        | 1        | 0        | 1        | 2        | 2        | Bacteria; Proteobacteria; Gammaproteobacteria; Legionellales                                           |
| Otu3295 | 1        | 2       | 0       | 2       | 1       | 0       | 0        | 1        | 0        | 1        | 1        | 0        | Bacteria; Proteobacteria; Gammaproteobacteria; Xanthomonadales; Sinobacteraceae                        |
| Otu3294 | 3        | 1       | 3       | 1       | 2       | 1       | 3        | 0        | 1        | 0        | 0        | 0        | Bacteria; Chloroflexi; Anaerolineae; GCA004                                                            |
| Otu3297 | 15       | 6       | 7       | 7       | 1       | 0       | 2        | 1        | 0        | 0        | 3        | 0        | Bacteria; Bacteroidetes; Saprospirae; Saprospirales; Chitinophagaceae                                  |
| Otu3296 | 0        | 1       | 0       | 0       | 0       | 0       | 0        | 0        | 0        | 0        | 3        | 0        | Bacteria; Proteobacteria; Betaproteobacteria; Procabacteriales; Procabacteriaceae; Leeia; Leeia_oryzae |
| Otu3299 | 0        | 0       | 0       | 0       | 2       | 0       | 0        | 0        | 0        | 0        | 0        | 0        | Bacteria                                                                                               |
| Otu3298 | 0        | 0       | 1       | 0       | 0       | 1       | 2        | 0        | 3        | 1        | 3        | 1        | Bacteria; Planctomycetes; Planctomycetia; Gemmatales; Gemmataceae                                      |
| Otu3008 | 0        | 1       | 2       | 1       | 2       | 2       | 2        | 1        | 0        | 0        | 4        | 0        | Bacteria; Firmicutes; Clostridia; Clostridiales; Ruminococcaceae                                       |
| Otu3009 | 0        | 2       | 1       | 0       | 0       | 0       | 1        | 0        | 0        | 1        | 0        | 0        | Bacteria; Actinobacteria                                                                               |
| Otu3186 | 0        | 2       | 0       | 0       | 0       | 0       | 0        | 0        | 0        | 0        | 0        | 0        | Bacteria; Chlamydiae; Chlamydia; Chlamydiales                                                          |
| Otu1727 | 1        | 2       | 1       | 5       | 6       | 0       | 0        | 1        | 1        | 0        | 2        | 0        | Bacteria; Proteobacteria; Gammaproteobacteria; Legionellales; Coxiellaceae; Aquicella                  |
| Otu1726 | 0        | 0       | 1       | 0       | 0       | 1       | 2        | 0        | 4        | 2        | 0        | 3        | Bacteria; Proteobacteria; Alphaproteobacteria                                                          |
| Otu1725 | 2        | 0       | 4       | 0       | 0       | 0       | 1        | 1        | 1        | 1        | 0        | 0        | Bacteria; Firmicutes; Bacilli; Bacillales; Thermoactinomycetaceae; Thermoactinomyces                   |
| Otu1724 | 0        | 0       | 0       | 3       | 3       | 0       | 2        | 1        | 0        | 3        | 1        | 1        | Bacteria; Proteobacteria; Gammaproteobacteria; Legionellales                                           |
| Otu1723 | 0        | 1       | 1       | 3       | 3       | 9       | 4        | 3        | 7        | 5        | 1        | 7        | Bacteria; Chloroflexi; Ktedonobacteria                                                                 |



| #OTU ID | Z31DSO1r | Z31DSO2 | Z31DSO3 | Z31DSO4 | Z31DSO5 | Z31DSO6 | Z31J1DSO1 | Z31J1DSO2 | Z31J1DSO3 | Z31J1DSO4 | Z31J1DSO5 | Z31J1DSO6 | taxonomy                                                                                                              |
|---------|----------|---------|---------|---------|---------|---------|-----------|-----------|-----------|-----------|-----------|-----------|-----------------------------------------------------------------------------------------------------------------------|
| Otu1267 | 8        | 4       | 5       | 10      | 1       | 0       | 2         | 0         | 2         | 4         | 7         | 1         | Bacteria; Proteobacteria; Deltaproteobacteria; Myxococcales                                                           |
| Otu1264 | 0        | 0       | 1       | 0       | 0       | 0       | 1         | 0         | 0         | 1         | 7         | 6         | Bacteria; FBP                                                                                                         |
| Otu1265 | 1        | 3       | 1       | 2       | 6       | 1       | 0         | 0         | 0         | 2         | 2         | 0         | Bacteria; Proteobacteria; Gammaproteobacteria; Legionellales; Coxiellaceae                                            |
| Otu3275 | 2        | 1       | 0       | 0       | 0       | 1       | 0         | 0         | 1         | 0         | 1         | 0         | Bacteria; Proteobacteria; Deltaproteobacteria; FAC87                                                                  |
| Otu1468 | 0        | 0       | 1       | 0       | 2       | 0       | 2         | 0         | 3         | 1         | 4         | 0         | Bacteria; Verrucomicrobia; Pedosphaerae                                                                               |
| Otu1469 | 4        | 4       | 3       | 0       | 1       | 3       | 2         | 0         | 3         | 1         | 6         | 3         | Bacteria; Planctomycetes; Planctomycetia; Pirellulales; Pirellulaceae                                                 |
| Otu1464 | 9        | 4       | 8       | 3       | 5       | 5       | 1         | 4         | 5         | 8         | 4         | 1         | Bacteria; Proteobacteria; Gammaproteobacteria; Pseudomonadales; Moraxellaceae; Acinetobacter; Acinetobacter_johnsonii |
| Otu1465 | 0        | 0       | 3       | 3       | 1       | 5       | 2         | 0         | 1         | 0         | 0         | 0         | Bacteria; Planctomycetes; Planctomycetia; Gemmatales; Gemmataceae                                                     |
| Otu1466 | 2        | 4       | 0       | 1       | 1       | 0       | 0         | 0         | 0         | 0         | 1         | 0         | Bacteria; Planctomycetes; Planctomycetia; Pirellulales; Pirellulaceae                                                 |
| Otu1467 | 1        | 4       | 2       | 2       | 3       | 6       | 4         | 3         | 4         | 5         | 6         | 3         | Bacteria; Planctomycetes; Planctomycetia; Pirellulales; Pirellulaceae; Pirellula                                      |
| Otu1460 | 5        | 3       | 3       | 1       | 5       | 2       | 0         | 3         | 1         | 2         | 1         | 0         | Bacteria; Proteobacteria; Deltaproteobacteria; Myxococcales                                                           |
| Otu1461 | 5        | 1       | 2       | 1       | 1       | 0       | 2         | 0         | 2         | 1         | 2         | 2         | Bacteria; Proteobacteria; Deltaproteobacteria; Myxococcales                                                           |
| Otu1462 | 5        | 1       | 0       | 1       | 0       | 2       | 0         | 1         | 2         | 0         | 0         | 0         | Bacteria; Cyanobacteria; Oscillatoriothycideae; Oscillatoriales; Phormidiaceae; Phormidium                            |
| Otu1463 | 9        | 1       | 3       | 3       | 1       | 1       | 3         | 2         | 1         | 1         | 5         | 1         | Bacteria; TM7; SC3                                                                                                    |
| Otu3183 | 0        | 0       | 0       | 0       | 0       | 0       | 0         | 0         | 0         | 0         | 3         | 1         | Bacteria; Proteobacteria; Betaproteobacteria                                                                          |
| Otu3177 | 0        | 1       | 0       | 0       | 0       | 0       | 2         | 0         | 0         | 0         | 0         | 0         | Bacteria; Proteobacteria; Deltaproteobacteria; Myxococcales                                                           |
| Otu2814 | 2        | 0       | 0       | 1       | 0       | 0       | 0         | 0         | 0         | 0         | 0         | 0         | Bacteria                                                                                                              |
| Otu2815 | 0        | 2       | 0       | 1       | 0       | 0       | 0         | 0         | 0         | 0         | 1         | 0         | Bacteria; Planctomycetes; vadinHA49; DH61                                                                             |
| Otu2817 | 2        | 0       | 0       | 0       | 0       | 0       | 0         | 0         | 0         | 0         | 0         | 0         | Bacteria; Proteobacteria; Betaproteobacteria                                                                          |
| Otu2810 | 0        | 0       | 0       | 2       | 0       | 0       | 0         | 0         | 2         | 3         | 0         | 0         | Bacteria                                                                                                              |
| Otu2811 | 0        | 0       | 1       | 2       | 0       | 0       | 0         | 0         | 0         | 0         | 0         | 1         | Bacteria; Proteobacteria; Deltaproteobacteria; Myxococcales                                                           |
| Otu2812 | 1        | 0       | 0       | 2       | 0       | 0       | 0         | 0         | 0         | 0         | 0         | 0         | Bacteria; Cyanobacteria; ML635J-21                                                                                    |

| #OTU ID | Z31DSO1r | Z31DSO2 | Z31DSO3 | Z31DSO4 | Z31DSO5 | Z31DSO6 | Z31J1DSO1 | Z31J1DSO2 | Z31J1DSO3 | Z31J1DSO4 | Z31J1DSO5 | Z31J1DSO6 | taxonomy                                                                                                   |
|---------|----------|---------|---------|---------|---------|---------|-----------|-----------|-----------|-----------|-----------|-----------|------------------------------------------------------------------------------------------------------------|
| Otu2813 | 11       | 3       | 6       | 5       | 3       | 3       | 16        | 2         | 3         | 1         | 10        | 2         | Bacteria; Actinobacteria; Acidimicrobiia; Acidimicrobiales                                                 |
| Otu3435 | 0        | 1       | 1       | 0       | 0       | 0       | 2         | 0         | 1         | 0         | 3         | 0         | Bacteria; Chloroflexi; Chloroflexi; Roseiflexales                                                          |
| Otu3434 | 1        | 0       | 0       | 0       | 0       | 0       | 0         | 0         | 1         | 2         | 0         | 0         | Bacteria; Elusimicrobia; Elusimicrobia; Iib                                                                |
| Otu3437 | 4        | 1       | 2       | 0       | 2       | 0       | 0         | 0         | 1         | 0         | 0         | 0         | Bacteria; Chloroflexi; Chloroflexi; Roseiflexales                                                          |
| Otu3436 | 0        | 1       | 0       | 0       | 1       | 0       | 2         | 0         | 0         | 1         | 3         | 0         | Bacteria; Chloroflexi                                                                                      |
| Otu2818 | 0        | 1       | 0       | 0       | 0       | 0       | 0         | 2         | 0         | 0         | 0         | 0         | Bacteria; Proteobacteria; Gammaproteobacteria; Xanthomonadales; Xanthomonadaceae                           |
| Otu2819 | 0        | 0       | 2       | 0       | 0       | 0       | 0         | 0         | 1         | 0         | 0         | 0         | Bacteria; Chloroflexi; Chloroflexi; Roseiflexales                                                          |
| Otu3433 | 3        | 0       | 0       | 1       | 1       | 1       | 0         | 1         | 1         | 0         | 1         | 0         | Bacteria; Planctomycetes; Phycisphaerae; MSBL9                                                             |
| Otu3432 | 2        | 0       | 0       | 0       | 0       | 0       | 0         | 0         | 0         | 0         | 0         | 0         | Bacteria; Planctomycetes; Planctomycetia; Gemmatales; Isosphaeraceae                                       |
| Otu3182 | 2        | 1       | 1       | 0       | 0       | 0       | 0         | 0         | 0         | 0         | 2         | 0         | Bacteria; Chloroflexi; Anaerolineae; Caldilineales; Caldilineaceae; Caldilinea                             |
| Otu1598 | 1        | 0       | 3       | 1       | 1       | 2       | 1         | 3         | 5         | 3         | 4         | 1         | Bacteria; Chlamydiae; Chlamydia; Chlamydiales                                                              |
| Otu1599 | 1        | 1       | 1       | 0       | 0       | 1       | 3         | 0         | 0         | 1         | 5         | 1         | Bacteria; Proteobacteria; Alphaproteobacteria; Rickettsiales; mitochondria; Syntrophia; Syntrophia_ruralis |
| Otu1590 | 1        | 0       | 0       | 1       | 0       | 0       | 0         | 0         | 0         | 5         | 0         | 0         | Bacteria; Proteobacteria; Alphaproteobacteria; Caulobacteriales; Caulobacteraceae; Asticcacaulis           |
| Otu1591 | 5        | 0       | 2       | 4       | 0       | 1       | 0         | 0         | 1         | 1         | 8         | 0         | Bacteria; Planctomycetes; Phycisphaerae; WD2101                                                            |
| Otu1592 | 14       | 8       | 17      | 13      | 12      | 18      | 31        | 7         | 25        | 10        | 26        | 7         | Bacteria; Actinobacteria; Actinobacteria; Actinomycetales; Micromonosporaceae                              |
| Otu1593 | 1        | 6       | 2       | 1       | 6       | 2       | 1         | 4         | 4         | 3         | 8         | 1         | Bacteria; Verrucomicrobia; Pedosphaerae; Pedosphaerales                                                    |
| Otu1594 | 11       | 9       | 12      | 22      | 6       | 12      | 11        | 12        | 10        | 10        | 17        | 8         | Bacteria; Proteobacteria; Deltaproteobacteria; Myxococcales; Polyangiaceae                                 |
| Otu1595 | 0        | 3       | 1       | 5       | 1       | 1       | 0         | 0         | 0         | 11        | 1         | 0         | Bacteria; Verrucomicrobia; Verrucomicrobiae; Verrucomicrobiales; Verrucomicrobiaceae; Luteolibacter        |
| Otu1596 | 6        | 1       | 3       | 4       | 2       | 3       | 1         | 2         | 0         | 0         | 8         | 0         | Bacteria; Actinobacteria; Acidimicrobiia; Acidimicrobiales                                                 |
| Otu1597 | 3        | 1       | 0       | 0       | 0       | 7       | 0         | 0         | 0         | 3         | 6         | 2         | Bacteria; Cyanobacteria                                                                                    |
| Otu1042 | 12       | 3       | 1       | 4       | 0       | 0       | 2         | 0         | 0         | 0         | 0         | 0         | Bacteria; Planctomycetes; Phycisphaerae; WD2101                                                            |
| Otu1043 | 4        | 1       | 1       | 6       | 1       | 1       | 4         | 0         | 2         | 6         | 7         | 2         | Bacteria; Bacteroidetes; Saprospirae; Saprospirales; Chitinophagaceae                                      |



| #OTU ID | Z31DSO1r | Z31DSO2 | Z31DSO3 | Z31DSO4 | Z31DSO5 | Z31DSO6 | Z31J1DSO1 | Z31J1DSO2 | Z31J1DSO3 | Z31J1DSO4 | Z31J1DSO5 | Z31J1DSO6 | taxonomy                                                                                           |
|---------|----------|---------|---------|---------|---------|---------|-----------|-----------|-----------|-----------|-----------|-----------|----------------------------------------------------------------------------------------------------|
| Otu529  | 3        | 1       | 14      | 24      | 6       | 5       | 2         | 6         | 4         | 6         | 9         | 5         | Bacteria; Proteobacteria; Deltaproteobacteria; Myxococcales                                        |
| Otu528  | 6        | 1       | 3       | 5       | 1       | 12      | 9         | 21        | 22        | 12        | 5         | 9         | Bacteria; Gemmatimonadetes; Gemmatimonadetes                                                       |
| Otu1046 | 0        | 0       | 7       | 0       | 0       | 6       | 0         | 0         | 0         | 0         | 0         | 0         | Bacteria                                                                                           |
| Otu1047 | 7        | 3       | 2       | 1       | 4       | 0       | 3         | 5         | 4         | 4         | 11        | 2         | Bacteria; Proteobacteria; Deltaproteobacteria; Myxococcales                                        |
| Otu1044 | 2        | 1       | 0       | 9       | 0       | 0       | 1         | 4         | 0         | 1         | 0         | 0         | Bacteria; Proteobacteria; Gammaproteobacteria                                                      |
| Otu1045 | 8        | 5       | 0       | 9       | 2       | 0       | 3         | 0         | 3         | 10        | 2         | 7         | Bacteria; Proteobacteria; Gammaproteobacteria; Alteromonadales; Alteromonadaceae; Cellvibrio       |
| Otu523  | 30       | 10      | 7       | 29      | 2       | 7       | 9         | 2         | 18        | 20        | 9         | 6         | Bacteria; Fibrobacteres; Fibrobacteria; 258ds10                                                    |
| Otu522  | 30       | 15      | 13      | 24      | 9       | 6       | 12        | 13        | 24        | 8         | 17        | 9         | Bacteria; Elusimicrobia; Elusimicrobia; FAC88                                                      |
| Otu521  | 4        | 1       | 6       | 16      | 10      | 3       | 9         | 17        | 13        | 12        | 19        | 13        | Bacteria; Proteobacteria; Gammaproteobacteria; Legionellales; Coxiellaceae                         |
| Otu520  | 7        | 8       | 20      | 10      | 13      | 11      | 34        | 14        | 13        | 10        | 47        | 4         | Bacteria; Cyanobacteria; Chloroplast; Stramenopiles                                                |
| Otu527  | 4        | 13      | 27      | 48      | 10      | 28      | 27        | 18        | 28        | 22        | 2         | 37        | Bacteria; Bacteroidetes; Saprospirae; Saprospirales; Chitinophagaceae                              |
| Otu526  | 81       | 32      | 80      | 83      | 9       | 22      | 53        | 12        | 41        | 26        | 21        | 61        | Bacteria; Proteobacteria; Betaproteobacteria; Burkholderiales; Oxalobacteraceae; Cupriavidus       |
| Otu525  | 2        | 2       | 8       | 4       | 10      | 6       | 19        | 10        | 5         | 8         | 18        | 3         | Bacteria; Cyanobacteria; Chloroplast; Chlorophyta                                                  |
| Otu524  | 21       | 15      | 5       | 2       | 37      | 1       | 1         | 1         | 0         | 4         | 20        | 1         | Bacteria; Bacteroidetes                                                                            |
| Otu1284 | 0        | 0       | 0       | 0       | 0       | 0       | 1         | 1         | 0         | 1         | 0         | 5         | Bacteria; Proteobacteria; Deltaproteobacteria; Bdellovibrionales; Bdellovibrionaceae; Bdellovibrio |
| Otu1285 | 4        | 2       | 3       | 7       | 2       | 4       | 1         | 1         | 1         | 6         | 5         | 1         | Bacteria; Proteobacteria; TA18; PHOS-HD29                                                          |
| Otu1286 | 0        | 0       | 0       | 1       | 1       | 6       | 2         | 4         | 1         | 0         | 0         | 1         | Bacteria; Proteobacteria; Deltaproteobacteria; Myxococcales                                        |
| Otu1287 | 2        | 1       | 5       | 4       | 5       | 4       | 0         | 0         | 5         | 7         | 1         | 6         | Bacteria; Proteobacteria; Deltaproteobacteria; Myxococcales                                        |
| Otu1280 | 1        | 1       | 0       | 0       | 0       | 2       | 4         | 2         | 1         | 6         | 0         | 1         | Bacteria                                                                                           |
| Otu1281 | 4        | 7       | 8       | 13      | 3       | 0       | 26        | 5         | 3         | 6         | 3         | 53        | Bacteria; Bacteroidetes; Sphingobacteriia; Sphingobacteriales; Sphingobacteriaceae                 |
| Otu1282 | 12       | 9       | 12      | 11      | 6       | 13      | 23        | 14        | 12        | 14        | 23        | 18        | Bacteria; Actinobacteria; Thermoleophilia; Gaiellales; Gaiellaceae                                 |
| Otu1283 | 0        | 10      | 5       | 6       | 2       | 1       | 1         | 0         | 1         | 1         | 3         | 1         | Bacteria; Actinobacteria; Actinobacteria; Actinomycetales; Microbacteriaceae; Agromyces            |

| #OTU ID | Z31DSO1r | Z31DSO2 | Z31DSO3 | Z31DSO4 | Z31DSO5 | Z31DSO6 | Z31J1DSO1 | Z31J1DSO2 | Z31J1DSO3 | Z31J1DSO4 | Z31J1DSO5 | Z31J1DSO6 | taxonomy                                                                                             |
|---------|----------|---------|---------|---------|---------|---------|-----------|-----------|-----------|-----------|-----------|-----------|------------------------------------------------------------------------------------------------------|
| Otu3264 | 2        | 0       | 0       | 0       | 0       | 0       | 0         | 0         | 0         | 0         | 0         | 0         | Bacteria; Firmicutes; Clostridia; Clostridiales                                                      |
| Otu1288 | 7        | 12      | 5       | 2       | 5       | 2       | 1         | 0         | 0         | 2         | 6         | 3         | Bacteria; Actinobacteria; MB-A2-108; 0319-7L14                                                       |
| Otu1289 | 9        | 2       | 2       | 2       | 1       | 0       | 4         | 0         | 0         | 0         | 0         | 0         | Bacteria; Bacteroidetes; Cytophagia; Cytophagales; Cytophagaceae                                     |
| Otu3265 | 1        | 0       | 0       | 0       | 0       | 0       | 0         | 0         | 0         | 0         | 2         | 0         | Bacteria; Proteobacteria; Alphaproteobacteria                                                        |
| Otu2588 | 191      | 71      | 180     | 289     | 121     | 98      | 184       | 165       | 202       | 309       | 254       | 216       | Bacteria; Acidobacteria; Acidobacteriia; Acidobacteriales; Koribacteraceae                           |
| Otu2589 | 2        | 0       | 1       | 0       | 2       | 1       | 3         | 0         | 0         | 0         | 0         | 1         | Bacteria; Proteobacteria; Alphaproteobacteria; Caulobacterales; Caulobacteraceae                     |
| Otu2582 | 0        | 0       | 2       | 3       | 0       | 0       | 2         | 2         | 2         | 0         | 0         | 2         | Bacteria; Bacteroidetes; Saprospirae; Saprospirales                                                  |
| Otu2583 | 0        | 0       | 0       | 3       | 2       | 1       | 0         | 0         | 3         | 0         | 1         | 1         | Bacteria; Proteobacteria; Gammaproteobacteria; Xanthomonadales                                       |
| Otu2580 | 0        | 1       | 1       | 2       | 0       | 1       | 1         | 1         | 5         | 0         | 3         | 1         | Bacteria; Planctomycetes; Planctomycetia; Gemmatales; Gemmataceae                                    |
| Otu2581 | 0        | 2       | 0       | 0       | 0       | 0       | 0         | 0         | 0         | 0         | 0         | 0         | Bacteria; Proteobacteria; TA18; CV90                                                                 |
| Otu2586 | 0        | 2       | 0       | 0       | 0       | 0       | 0         | 0         | 1         | 1         | 0         | 0         | Bacteria; Proteobacteria; Gammaproteobacteria; Legionellales                                         |
| Otu2587 | 0        | 0       | 0       | 2       | 0       | 1       | 1         | 2         | 1         | 2         | 2         | 0         | Bacteria; Actinobacteria; Actinobacteria; Actinomycetales; Actinospicaceae                           |
| Otu2584 | 0        | 1       | 1       | 2       | 0       | 0       | 2         | 0         | 0         | 0         | 0         | 0         | Bacteria; Planctomycetes; Planctomycetia; Gemmatales; Gemmataceae; Gemmata                           |
| Otu2585 | 0        | 0       | 0       | 0       | 0       | 0       | 1         | 0         | 0         | 0         | 2         | 0         | Bacteria                                                                                             |
| Otu3268 | 0        | 0       | 0       | 0       | 0       | 0       | 2         | 0         | 0         | 0         | 0         | 1         | Bacteria; Proteobacteria; Gammaproteobacteria; Legionellales; Legionellaceae                         |
| Otu2748 | 2        | 3       | 3       | 1       | 0       | 1       | 2         | 1         | 0         | 3         | 4         | 0         | Bacteria; Proteobacteria; Alphaproteobacteria; Rhizobiales; Bradyrhizobiaceae                        |
| Otu2749 | 0        | 1       | 1       | 1       | 0       | 0       | 0         | 0         | 1         | 0         | 3         | 1         | Bacteria; Cyanobacteria; ML635J-21                                                                   |
| Otu3269 | 0        | 0       | 0       | 0       | 0       | 2       | 0         | 0         | 0         | 0         | 0         | 0         | Bacteria; Proteobacteria; Deltaproteobacteria; Myxococcales; Cystobacterineae                        |
| Otu2744 | 0        | 1       | 0       | 0       | 0       | 0       | 5         | 3         | 0         | 0         | 1         | 4         | Bacteria; Actinobacteria; Actinobacteria; Actinomycetales; Promicromonosporaceae; Cellulosimicrobium |
| Otu2745 | 2        | 0       | 1       | 3       | 1       | 1       | 3         | 2         | 6         | 0         | 3         | 0         | Bacteria; Bacteroidetes; Saprospirae; Saprospirales; Chitinophagaceae; Flavisolibacter               |
| Otu2746 | 0        | 0       | 0       | 0       | 0       | 0       | 0         | 0         | 0         | 0         | 2         | 0         | Bacteria; Armatimonadetes; SJA-176; RB046                                                            |
| Otu2747 | 0        | 2       | 0       | 1       | 0       | 0       | 3         | 1         | 0         | 0         | 0         | 0         | Bacteria; Armatimonadetes; Chthonomonadetes; SJA-22                                                  |

| #OTU ID | Z31DSO1r | Z31DSO2 | Z31DSO3 | Z31DSO4 | Z31DSO5 | Z31DSO6 | Z31J1DSO1 | Z31J1DSO2 | Z31J1DSO3 | Z31J1DSO4 | Z31J1DSO5 | Z31J1DSO6 | taxonomy                                                                                           |
|---------|----------|---------|---------|---------|---------|---------|-----------|-----------|-----------|-----------|-----------|-----------|----------------------------------------------------------------------------------------------------|
| Otu2741 | 0        | 0       | 0       | 2       | 2       | 0       | 2         | 0         | 0         | 0         | 2         | 0         | Bacteria; Firmicutes; Clostridia; OPB54                                                            |
| Otu2742 | 1        | 1       | 1       | 3       | 1       | 0       | 1         | 1         | 2         | 1         | 4         | 4         | Bacteria; Armatimonadetes; Fimbriimonadia; Fimbriimonadales;<br>Fimbriimonadaceae; Fimbriimonas    |
| Otu2743 | 0        | 0       | 0       | 0       | 0       | 0       | 0         | 0         | 0         | 0         | 2         | 0         | Bacteria                                                                                           |
| Otu417  | 24       | 10      | 15      | 27      | 8       | 4       | 8         | 13        | 8         | 10        | 18        | 4         | Bacteria; Verrucomicrobia; Pedosphaerae; Pedosphaerales; Ellin517                                  |
| Otu416  | 20       | 23      | 13      | 20      | 10      | 9       | 10        | 22        | 24        | 11        | 8         | 19        | Bacteria; Chlorobi                                                                                 |
| Otu415  | 19       | 11      | 15      | 13      | 13      | 2       | 28        | 4         | 6         | 1         | 45        | 4         | Bacteria; Proteobacteria; Alphaproteobacteria; Rhodospirillales;<br>Rhodospirillaceae; Skermanella |
| Otu414  | 21       | 29      | 27      | 7       | 0       | 1       | 14        | 5         | 31        | 3         | 9         | 4         | Bacteria; Bacteroidetes; Saprospirae; Saprospirales; Chitinophagaceae                              |
| Otu413  | 0        | 1       | 5       | 6       | 0       | 32      | 5         | 27        | 21        | 10        | 1         | 10        | Bacteria; Chloroflexi; Anaerolineae; SBR1031; oc28                                                 |
| Otu412  | 0        | 0       | 5       | 10      | 3       | 3       | 8         | 2         | 14        | 22        | 13        | 10        | Bacteria; Chlamydiae; Chlamydia; Chlamydiales                                                      |
| Otu411  | 48       | 7       | 10      | 18      | 6       | 12      | 28        | 5         | 19        | 22        | 16        | 11        | Bacteria; Proteobacteria; Alphaproteobacteria                                                      |
| Otu410  | 77       | 63      | 58      | 48      | 65      | 21      | 33        | 11        | 22        | 61        | 101       | 21        | Bacteria; Verrucomicrobia; Pedosphaerae; Pedosphaerales; Ellin517                                  |
| Otu419  | 17       | 8       | 11      | 29      | 8       | 30      | 30        | 12        | 31        | 25        | 24        | 25        | Bacteria; Bacteroidetes; Saprospirae; Saprospirales; Chitinophagaceae                              |
| Otu418  | 57       | 16      | 20      | 42      | 31      | 13      | 14        | 16        | 12        | 25        | 31        | 13        | Bacteria; Planctomycetes; Phycisphaerae; WD2101                                                    |
| Otu1138 | 0        | 0       | 1       | 1       | 0       | 4       | 0         | 1         | 8         | 0         | 1         | 1         | Bacteria; Chloroflexi; Ktedonobacteria; Thermogemmatisporales;<br>Thermogemmatisporaceae           |
| Otu1139 | 11       | 35      | 5       | 4       | 7       | 0       | 49        | 1         | 3         | 17        | 9         | 17        | Bacteria; Bacteroidetes; Sphingobacteriia; Sphingobacteriales;<br>Sphingobacteriaceae; Pedobacter  |
| Otu1136 | 2        | 6       | 11      | 1       | 2       | 1       | 0         | 0         | 1         | 0         | 6         | 0         | Bacteria; Proteobacteria; Gammaproteobacteria; Xanthomonadales;<br>Sinobacteraceae; Steroidobacter |
| Otu1137 | 0        | 0       | 6       | 0       | 0       | 0       | 0         | 0         | 0         | 0         | 0         | 0         | Bacteria; OP11; OP11-3                                                                             |
| Otu1134 | 3        | 6       | 1       | 1       | 0       | 1       | 0         | 0         | 0         | 0         | 4         | 1         | Bacteria; Planctomycetes; Phycisphaerae; WD2101                                                    |
| Otu1135 | 16       | 5       | 9       | 7       | 4       | 7       | 5         | 4         | 6         | 1         | 14        | 3         | Bacteria; Proteobacteria; Betaproteobacteria                                                       |
| Otu1132 | 1        | 10      | 1       | 2       | 1       | 1       | 0         | 0         | 4         | 3         | 0         | 2         | Bacteria; Bacteroidetes; Cytophagia; Cytophagales; Cytophagaceae                                   |
| Otu1133 | 1        | 0       | 0       | 4       | 0       | 1       | 8         | 0         | 0         | 3         | 0         | 1         | Bacteria; Gemmatimonadetes; Gemmatimonadetes; Ellin5290                                            |
| Otu1130 | 5        | 7       | 5       | 2       | 7       | 7       | 0         | 1         | 0         | 5         | 7         | 1         | Bacteria; Chloroflexi; Anaerolineae; SBR1031; oc28                                                 |

| #OTU ID | Z31DSO1r | Z31DSO2 | Z31DSO3 | Z31DSO4 | Z31DSO5 | Z31DSO6 | Z31JDSO1 | Z31JDSO2 | Z31JDSO3 | Z31JDSO4 | Z31JDSO5 | Z31JDSO6 | taxonomy                                                                                      |
|---------|----------|---------|---------|---------|---------|---------|----------|----------|----------|----------|----------|----------|-----------------------------------------------------------------------------------------------|
| Otu1131 | 6        | 6       | 0       | 4       | 1       | 0       | 2        | 0        | 0        | 0        | 5        | 1        | Bacteria; Planctomycetes; vadinHA49; DH61                                                     |
| Otu3149 | 0        | 1       | 0       | 0       | 0       | 0       | 1        | 0        | 0        | 0        | 5        | 0        | Bacteria; Proteobacteria; Alphaproteobacteria; Rickettsiales; mitochondria                    |
| Otu899  | 50       | 33      | 24      | 72      | 35      | 28      | 41       | 20       | 43       | 54       | 55       | 27       | Bacteria; Verrucomicrobia; Pedosphaerae; Pedosphaerales; Ellin515                             |
| Otu898  | 9        | 0       | 0       | 0       | 0       | 1       | 0        | 1        | 0        | 0        | 1        | 1        | Bacteria; Bacteroidetes                                                                       |
| Otu679  | 8        | 8       | 7       | 6       | 7       | 5       | 9        | 4        | 13       | 7        | 20       | 8        | Bacteria; Actinobacteria; Thermoleophilia; Solirubrobacterales                                |
| Otu678  | 13       | 2       | 5       | 4       | 1       | 2       | 8        | 4        | 1        | 1        | 5        | 2        | Bacteria; Acidobacteria; Solibacteres; Solibacterales; Solibacteraceae; Candidatus_Solibacter |
| Otu677  | 5        | 3       | 7       | 12      | 6       | 4       | 11       | 10       | 17       | 7        | 16       | 9        | Bacteria; Gemmatimonadetes; Gemmatimonadetes; Gemmatimonadales                                |
| Otu676  | 7        | 8       | 2       | 8       | 4       | 7       | 15       | 4        | 8        | 5        | 4        | 2        | Bacteria; Actinobacteria; Acidimicrobia; Acidimicrobiales; C111                               |
| Otu675  | 27       | 0       | 0       | 7       | 2       | 6       | 6        | 5        | 9        | 4        | 0        | 4        | Bacteria; Proteobacteria; Alphaproteobacteria; Ellin329                                       |
| Otu674  | 26       | 23      | 21      | 43      | 15      | 31      | 23       | 13       | 34       | 12       | 24       | 8        | Bacteria; Planctomycetes; BD7-11                                                              |
| Otu673  | 1        | 0       | 8       | 0       | 1       | 5       | 17       | 1        | 0        | 5        | 1        | 0        | Bacteria; Proteobacteria; Alphaproteobacteria; Rhizobiales; Rhizobiaceae; Kaistia             |
| Otu672  | 3        | 2       | 4       | 10      | 3       | 5       | 12       | 3        | 3        | 15       | 5        | 4        | Bacteria                                                                                      |
| Otu895  | 2        | 6       | 3       | 14      | 3       | 7       | 2        | 3        | 11       | 1        | 6        | 3        | Bacteria; Cyanobacteria; 4C0d-2; MLE1-12                                                      |
| Otu670  | 29       | 14      | 100     | 57      | 12      | 22      | 119      | 39       | 19       | 28       | 17       | 21       | Bacteria; Proteobacteria; Betaproteobacteria; Burkholderiales; Burkholderiaceae; Burkholderia |
| Otu2444 | 3        | 0       | 0       | 0       | 0       | 0       | 0        | 1        | 0        | 0        | 0        | 0        | Bacteria; Tenericutes; Mollicutes; Anaeroplasmatales; Anaeroplasmataceae; Asteroleplasma      |
| Otu389  | 61       | 22      | 14      | 15      | 10      | 29      | 22       | 9        | 17       | 13       | 25       | 12       | Bacteria; Proteobacteria; Gammaproteobacteria; Xanthomonadales; Xanthomonadaceae; Dokdonella  |
| Otu388  | 18       | 11      | 4       | 28      | 14      | 5       | 21       | 16       | 20       | 14       | 11       | 18       | Bacteria; Proteobacteria; Deltaproteobacteria; Myxococcales                                   |
| Otu387  | 9        | 5       | 10      | 27      | 1       | 22      | 11       | 19       | 35       | 3        | 10       | 5        | Bacteria; Actinobacteria; Thermoleophilia; Solirubrobacterales; Conexibacteraceae             |
| Otu386  | 23       | 50      | 59      | 73      | 37      | 56      | 93       | 72       | 94       | 82       | 25       | 115      | Bacteria; Proteobacteria; Betaproteobacteria; Methylophilales; Methylophilaceae               |
| Otu385  | 2        | 1       | 2       | 13      | 6       | 11      | 9        | 34       | 6        | 20       | 12       | 11       | Bacteria; Chloroflexi; Anaerolineae; SBR1031; oc28                                            |
| Otu384  | 19       | 27      | 9       | 27      | 36      | 16      | 27       | 19       | 42       | 22       | 23       | 25       | Bacteria; Gemmatimonadetes; Gemm-1                                                            |
| Otu383  | 36       | 34      | 22      | 24      | 28      | 5       | 17       | 4        | 9        | 11       | 40       | 5        | Bacteria; Acidobacteria; Acidobacteria-6; iii1-15                                             |

| #OTU ID | Z31DSO1r | Z31DSO2 | Z31DSO3 | Z31DSO4 | Z31DSO5 | Z31DSO6 | Z31JDSO1 | Z31JDSO2 | Z31JDSO3 | Z31JDSO4 | Z31JDSO5 | Z31JDSO6 | taxonomy                                                                                     |
|---------|----------|---------|---------|---------|---------|---------|----------|----------|----------|----------|----------|----------|----------------------------------------------------------------------------------------------|
| Otu382  | 7        | 5       | 10      | 4       | 19      | 15      | 6        | 3        | 3        | 1        | 29       | 1        | Bacteria; Chloroflexi; Anaerolineae; SBR1031; oc28                                           |
| Otu381  | 23       | 7       | 11      | 15      | 6       | 23      | 13       | 12       | 14       | 29       | 31       | 12       | Bacteria; Acidobacteria; Solibacteres; Solibacterales                                        |
| Otu380  | 21       | 9       | 17      | 10      | 12      | 9       | 62       | 9        | 10       | 3        | 17       | 8        | Bacteria; Actinobacteria; Actinobacteria; Actinomycetales; Nocardioideae; Kribbella          |
| Otu2328 | 0        | 0       | 0       | 0       | 0       | 1       | 0        | 0        | 3        | 1        | 0        | 0        | Bacteria                                                                                     |
| Otu2329 | 0        | 3       | 0       | 0       | 0       | 0       | 0        | 0        | 0        | 0        | 0        | 0        | Bacteria; Tenericutes; Mollicutes; Anaeroplasmatales; Anaeroplasmataceae; Asteroleplasma     |
| Otu251  | 37       | 22      | 17      | 58      | 7       | 25      | 18       | 11       | 20       | 30       | 20       | 20       | Bacteria; Bacteroidetes; Saprospirae; Saprospirales; Chitinophagaceae                        |
| Otu250  | 27       | 10      | 7       | 24      | 6       | 25      | 39       | 31       | 28       | 49       | 10       | 30       | Bacteria; Gemmatimonadetes; Gemmatimonadetes; Ellin5290                                      |
| Otu253  | 19       | 12      | 13      | 23      | 14      | 49      | 6        | 9        | 8        | 15       | 40       | 13       | Bacteria; Chloroflexi; Anaerolineae; SBR1031; oc28                                           |
| Otu252  | 92       | 53      | 33      | 36      | 23      | 14      | 71       | 34       | 37       | 70       | 55       | 69       | Bacteria; Gemmatimonadetes; Gemmatimonadetes; Ellin5290                                      |
| Otu255  | 39       | 38      | 34      | 54      | 41      | 51      | 63       | 33       | 57       | 31       | 117      | 28       | Bacteria; Actinobacteria; Thermoleophilia; Gaiellales; Gaiellaceae                           |
| Otu254  | 83       | 61      | 68      | 100     | 30      | 42      | 61       | 43       | 103      | 93       | 81       | 82       | Bacteria; Bacteroidetes; Saprospirae; Saprospirales; Chitinophagaceae                        |
| Otu257  | 91       | 13      | 7       | 10      | 7       | 8       | 9        | 2        | 4        | 21       | 8        | 15       | Bacteria; Proteobacteria; Gammaproteobacteria; HTCC2188; HTCC2089                            |
| Otu256  | 23       | 9       | 20      | 51      | 9       | 45      | 37       | 40       | 38       | 70       | 11       | 44       | Bacteria; Planctomycetes; Phycisphaerae; WD2101                                              |
| Otu259  | 84       | 26      | 23      | 25      | 20      | 15      | 23       | 16       | 10       | 15       | 33       | 7        | Bacteria; Acidobacteria; Chloracidobacteria; DS-100                                          |
| Otu258  | 6        | 9       | 8       | 51      | 0       | 0       | 10       | 1        | 0        | 1        | 2        | 2        | Bacteria; Proteobacteria; Gammaproteobacteria; Xanthomonadales; Xanthomonadaceae; Dokdonella |
| Otu709  | 6        | 5       | 7       | 15      | 3       | 6       | 6        | 10       | 3        | 7        | 11       | 2        | Bacteria; Chloroflexi; Anaerolineae; SBR1031; oc28                                           |
| Otu708  | 2        | 1       | 2       | 5       | 2       | 2       | 12       | 4        | 6        | 2        | 7        | 4        | Bacteria; Planctomycetes; Planctomycetia; Gemmatales; Gemmataceae                            |
| Otu3143 | 2        | 0       | 0       | 0       | 0       | 0       | 0        | 0        | 0        | 0        | 0        | 0        | Bacteria; Acidobacteria; AT-s54                                                              |
| Otu1860 | 1        | 1       | 1       | 1       | 1       | 4       | 0        | 0        | 0        | 0        | 0        | 0        | Bacteria; Proteobacteria; Deltaproteobacteria                                                |
| Otu1861 | 1        | 6       | 2       | 4       | 2       | 6       | 0        | 0        | 3        | 2        | 5        | 2        | Bacteria; Proteobacteria; Deltaproteobacteria; Myxococcales                                  |
| Otu1862 | 3        | 8       | 5       | 8       | 2       | 8       | 7        | 3        | 10       | 12       | 6        | 8        | Bacteria; Proteobacteria; Deltaproteobacteria; Myxococcales                                  |
| Otu1863 | 7        | 6       | 8       | 9       | 6       | 5       | 9        | 2        | 17       | 13       | 18       | 5        | Bacteria; Actinobacteria; Thermoleophilia; Gaiellales; Gaiellaceae                           |

| #OTU ID | Z31DSO1r | Z31DSO2 | Z31DSO3 | Z31DSO4 | Z31DSO5 | Z31DSO6 | Z31JDSO1 | Z31JDSO2 | Z31JDSO3 | Z31JDSO4 | Z31JDSO5 | Z31JDSO6 | taxonomy                                                                                                           |
|---------|----------|---------|---------|---------|---------|---------|----------|----------|----------|----------|----------|----------|--------------------------------------------------------------------------------------------------------------------|
| Otu1864 | 0        | 0       | 4       | 0       | 3       | 0       | 0        | 0        | 0        | 0        | 0        | 0        | Bacteria; Verrucomicrobia; Pedosphaerae; Pedosphaerales                                                            |
| Otu1865 | 6        | 1       | 0       | 4       | 0       | 1       | 2        | 0        | 3        | 0        | 1        | 0        | Bacteria; Armatimonadetes; Chthonomonadetes; Chthonomonadales; Chthonomonadaceae                                   |
| Otu1866 | 0        | 1       | 1       | 2       | 1       | 0       | 0        | 1        | 1        | 1        | 3        | 1        | Bacteria; Planctomycetes; Planctomycetia; Planctomycetales; Planctomycetaceae; Planctomyces                        |
| Otu1867 | 3        | 0       | 0       | 1       | 0       | 0       | 0        | 0        | 0        | 0        | 0        | 0        | Bacteria; Tenericutes; Mollicutes                                                                                  |
| Otu1868 | 3        | 0       | 1       | 2       | 2       | 0       | 7        | 5        | 5        | 2        | 3        | 3        | Bacteria; Proteobacteria; Alphaproteobacteria; Rhodospirillales; Rhodospirillaceae                                 |
| Otu1869 | 0        | 0       | 0       | 2       | 1       | 0       | 2        | 0        | 1        | 0        | 4        | 0        | Bacteria                                                                                                           |
| Otu2323 | 0        | 0       | 1       | 1       | 2       | 0       | 1        | 0        | 0        | 0        | 0        | 0        | Bacteria; Proteobacteria; Alphaproteobacteria; Rhodobacterales; Hyphomonadaceae                                    |
| Otu2362 | 0        | 0       | 1       | 0       | 1       | 1       | 2        | 0        | 2        | 0        | 0        | 0        | Bacteria; Firmicutes; Bacilli; Bacillales; Paenibacillaceae; Paenibacillus                                         |
| Otu2363 | 2        | 1       | 1       | 0       | 0       | 0       | 2        | 2        | 1        | 2        | 0        | 0        | Bacteria; Chlamydiae; Chlamydia; Chlamydiales                                                                      |
| Otu2360 | 2        | 0       | 0       | 0       | 0       | 0       | 0        | 0        | 0        | 0        | 0        | 0        | Bacteria; Acidobacteria; Solibacteres; Solibacterales                                                              |
| Otu2361 | 0        | 0       | 0       | 1       | 0       | 0       | 0        | 0        | 0        | 0        | 2        | 0        | Bacteria; Proteobacteria; Alphaproteobacteria; Rickettsiales; mitochondria                                         |
| Otu2366 | 0        | 0       | 1       | 1       | 0       | 0       | 0        | 0        | 0        | 2        | 2        | 1        | Bacteria; OP3; PBS-25                                                                                              |
| Otu2367 | 0        | 0       | 0       | 1       | 1       | 2       | 0        | 0        | 1        | 0        | 1        | 3        | Bacteria; Proteobacteria; Gammaproteobacteria; Legionellales                                                       |
| Otu2364 | 0        | 0       | 0       | 0       | 1       | 0       | 0        | 0        | 0        | 2        | 1        | 0        | Bacteria; OD1; SM2F11                                                                                              |
| Otu2365 | 6        | 8       | 15      | 7       | 8       | 5       | 14       | 3        | 4        | 9        | 16       | 4        | Bacteria; Verrucomicrobia; Spartobacteria; Chthoniobacteriales; Chthoniobacteraceae                                |
| Otu2368 | 0        | 2       | 0       | 0       | 0       | 0       | 1        | 1        | 0        | 0        | 0        | 0        | Bacteria; Proteobacteria; Alphaproteobacteria; Rhodospirillales; Rhodospirillaceae; Inquilinus; Inquilinus Jimosus |
| Otu2369 | 3        | 0       | 4       | 8       | 1       | 4       | 9        | 1        | 5        | 0        | 8        | 2        | Bacteria; Actinobacteria; Actinobacteria; Actinomycetales; Geodermatophilaceae; Geodermatophilus                   |
| Otu2564 | 0        | 1       | 0       | 0       | 0       | 2       | 0        | 0        | 0        | 2        | 0        | 1        | Bacteria; FBP                                                                                                      |
| Otu2565 | 0        | 0       | 2       | 0       | 1       | 0       | 0        | 0        | 0        | 1        | 0        | 0        | Bacteria; Firmicutes; Clostridia; Clostridiales; Clostridiaceae; Clostridium                                       |
| Otu2566 | 0        | 0       | 0       | 0       | 0       | 3       | 2        | 0        | 0        | 0        | 0        | 0        | Bacteria                                                                                                           |
| Otu2567 | 6        | 25      | 1       | 12      | 3       | 3       | 4        | 6        | 2        | 4        | 2        | 4        | Bacteria; Proteobacteria; Alphaproteobacteria; Sphingomonadales; Sphingomonadaceae; Novosphingobium                |
| Otu2560 | 2        | 0       | 0       | 0       | 0       | 0       | 0        | 0        | 0        | 0        | 0        | 0        | Bacteria; Planctomycetes; OM190; CL500-15                                                                          |

| #OTU ID | Z31DSO1r | Z31DSO2 | Z31DSO3 | Z31DSO4 | Z31DSO5 | Z31DSO6 | Z31J1DSO1 | Z31J1DSO2 | Z31J1DSO3 | Z31J1DSO4 | Z31J1DSO5 | Z31J1DSO6 | taxonomy                                                                                                                     |
|---------|----------|---------|---------|---------|---------|---------|-----------|-----------|-----------|-----------|-----------|-----------|------------------------------------------------------------------------------------------------------------------------------|
| Otu2561 | 0        | 0       | 0       | 0       | 0       | 0       | 0         | 0         | 0         | 0         | 2         | 0         | Bacteria; Bacteroidetes; Cytophagia; Cytophagales; Cytophagaceae; Hymenobacter                                               |
| Otu2562 | 2        | 0       | 0       | 0       | 0       | 0       | 0         | 0         | 0         | 0         | 0         | 1         | Bacteria; OD1; ZB2                                                                                                           |
| Otu2563 | 0        | 1       | 3       | 1       | 1       | 0       | 0         | 0         | 2         | 0         | 0         | 0         | Bacteria; TM7; SC3                                                                                                           |
| Otu2568 | 3        | 1       | 1       | 0       | 0       | 2       | 0         | 0         | 0         | 1         | 1         | 0         | Bacteria; Acidobacteria; Sva0725; Sva0725                                                                                    |
| Otu2569 | 0        | 0       | 0       | 0       | 0       | 0       | 2         | 0         | 0         | 0         | 0         | 0         | Bacteria; OD1; ZB2                                                                                                           |
| Otu3155 | 0        | 0       | 0       | 1       | 0       | 0       | 2         | 0         | 0         | 0         | 0         | 0         | Bacteria; Planctomycetes; Planctomycetia; Gemmatales; Gemmataceae                                                            |
| Otu3350 | 2        | 0       | 0       | 3       | 0       | 0       | 0         | 1         | 2         | 3         | 2         | 0         | Bacteria; Proteobacteria; Betaproteobacteria                                                                                 |
| Otu2325 | 0        | 0       | 0       | 0       | 2       | 0       | 0         | 0         | 0         | 0         | 1         | 0         | Bacteria; Proteobacteria; Alphaproteobacteria                                                                                |
| Otu3352 | 4        | 2       | 9       | 21      | 10      | 14      | 4         | 3         | 9         | 5         | 11        | 4         | Bacteria; Verrucomicrobia; Pedosphaerae; Pedosphaerales; Ellin515                                                            |
| Otu3353 | 0        | 2       | 0       | 0       | 0       | 0       | 0         | 0         | 0         | 0         | 0         | 0         | Bacteria; Planctomycetes; Planctomycetia; Pirellulales; Pirellulaceae                                                        |
| Otu1918 | 3        | 0       | 0       | 0       | 0       | 2       | 0         | 0         | 0         | 0         | 1         | 0         | Bacteria; Planctomycetes; Planctomycetia; Gemmatales; Gemmataceae                                                            |
| Otu1919 | 8        | 3       | 4       | 8       | 5       | 0       | 2         | 0         | 1         | 1         | 7         | 3         | Bacteria; Proteobacteria; Alphaproteobacteria; Sphingomonadales; Sphingomonadaceae; Sphingomonas; Sphingomonas_changbaiensis |
| Otu3356 | 0        | 0       | 1       | 0       | 0       | 1       | 3         | 2         | 2         | 1         | 1         | 0         | Bacteria; Armatimonadetes; Armatimonadia; FW68                                                                               |
| Otu3357 | 0        | 0       | 1       | 0       | 0       | 2       | 0         | 0         | 1         | 0         | 2         | 0         | Bacteria; Proteobacteria; Gammaproteobacteria; Legionellales                                                                 |
| Otu1914 | 1        | 1       | 0       | 0       | 1       | 0       | 0         | 1         | 2         | 4         | 5         | 0         | Bacteria; Chloroflexi; Anaerolineae; A31                                                                                     |
| Otu1915 | 0        | 0       | 0       | 0       | 0       | 0       | 1         | 0         | 1         | 1         | 3         | 3         | Bacteria; Bacteroidetes; Sphingobacteriia; Sphingobacteriales                                                                |
| Otu1916 | 1        | 0       | 2       | 1       | 0       | 1       | 1         | 2         | 1         | 0         | 1         | 5         | Bacteria; Proteobacteria; Deltaproteobacteria; Bdellovibrionales; Bdellovibrionaceae; Bdellovibrio                           |
| Otu1917 | 3        | 1       | 2       | 0       | 0       | 0       | 0         | 0         | 1         | 1         | 3         | 1         | Bacteria; AD3; ABS-6                                                                                                         |
| Otu1910 | 0        | 1       | 15      | 0       | 1       | 1       | 6         | 0         | 1         | 2         | 2         | 0         | Bacteria; Proteobacteria; Gammaproteobacteria; Xanthomonadales; Xanthomonadaceae                                             |
| Otu1911 | 0        | 1       | 5       | 0       | 1       | 4       | 5         | 4         | 5         | 0         | 5         | 4         | Bacteria; Actinobacteria; Actinobacteria; Actinomycetales; Thermomonosporaceae                                               |
| Otu1912 | 0        | 5       | 0       | 0       | 0       | 0       | 0         | 0         | 0         | 0         | 2         | 0         | Bacteria; Acidobacteria; Chloracidobacteria                                                                                  |
| Otu1913 | 3        | 1       | 1       | 4       | 2       | 0       | 4         | 0         | 1         | 1         | 2         | 2         | Bacteria                                                                                                                     |

| #OTU ID | Z31DSO1r | Z31DSO2 | Z31DSO3 | Z31DSO4 | Z31DSO5 | Z31DSO6 | Z31JDSO1 | Z31JDSO2 | Z31JDSO3 | Z31JDSO4 | Z31JDSO5 | Z31JDSO6 | taxonomy                                                                          |
|---------|----------|---------|---------|---------|---------|---------|----------|----------|----------|----------|----------|----------|-----------------------------------------------------------------------------------|
| Otu875  | 20       | 5       | 6       | 2       | 5       | 4       | 4        | 0        | 4        | 4        | 5        | 1        | Bacteria; Planctomycetes; Planctomycetia; Pirellulales; Pirellulaceae; A17        |
| Otu874  | 20       | 3       | 5       | 6       | 5       | 9       | 3        | 6        | 8        | 9        | 8        | 4        | Bacteria; Proteobacteria; Alphaproteobacteria; Rhodospirillales; Acetobacteraceae |
| Otu877  | 12       | 4       | 4       | 1       | 2       | 1       | 4        | 1        | 0        | 1        | 1        | 1        | Bacteria; Proteobacteria; Alphaproteobacteria; Rhizobiales                        |
| Otu876  | 4        | 2       | 9       | 5       | 3       | 9       | 6        | 1        | 7        | 2        | 13       | 5        | Bacteria; Planctomycetes; Planctomycetia; Pirellulales; Pirellulaceae             |
| Otu871  | 11       | 6       | 2       | 6       | 9       | 1       | 3        | 5        | 0        | 19       | 6        | 2        | Bacteria; Proteobacteria; Gammaproteobacteria; Legionellales                      |
| Otu870  | 9        | 0       | 4       | 1       | 2       | 3       | 5        | 1        | 3        | 0        | 3        | 3        | Bacteria; Acidobacteria; Solibacteres; Solibacterales                             |
| Otu873  | 7        | 2       | 4       | 7       | 4       | 6       | 7        | 8        | 4        | 8        | 10       | 10       | Bacteria; Planctomycetes; vadinHA49; DH61                                         |
| Otu872  | 2        | 4       | 5       | 3       | 2       | 10      | 6        | 3        | 3        | 0        | 8        | 3        | Bacteria; Proteobacteria; Alphaproteobacteria; Rickettsiales; mitochondria        |
| Otu3198 | 0        | 0       | 0       | 0       | 0       | 1       | 3        | 0        | 0        | 0        | 0        | 0        | Bacteria; Planctomycetes; Planctomycetia; Gemmatales; Gemmataceae; Gemmata        |
| Otu3199 | 0        | 1       | 0       | 0       | 0       | 1       | 1        | 0        | 0        | 3        | 0        | 0        | Bacteria; TM7; SC3                                                                |
| Otu879  | 9        | 2       | 6       | 13      | 11      | 4       | 8        | 3        | 4        | 15       | 13       | 3        | Bacteria; Bacteroidetes; Saprospirae; Saprospirales; Chitinophagaceae             |
| Otu878  | 8        | 9       | 5       | 1       | 3       | 1       | 1        | 1        | 4        | 12       | 3        | 9        | Bacteria; WS3; PRR-12; Sediment-1                                                 |
| Otu2322 | 2        | 1       | 3       | 2       | 2       | 1       | 3        | 1        | 0        | 0        | 0        | 2        | Bacteria; Chloroflexi; Chloroflexi; Roseiflexales                                 |
| Otu3429 | 0        | 2       | 0       | 0       | 0       | 0       | 0        | 0        | 1        | 0        | 0        | 0        | Bacteria; Verrucomicrobia; Pedosphaerae; Pedosphaerales                           |
| Otu3481 | 2        | 0       | 0       | 0       | 0       | 0       | 0        | 0        | 0        | 0        | 0        | 0        | Bacteria                                                                          |
| Otu2173 | 18       | 6       | 4       | 3       | 3       | 2       | 1        | 0        | 2        | 4        | 6        | 1        | Bacteria; Planctomycetes; Phycisphaerae; WD2101                                   |
| Otu2172 | 0        | 0       | 0       | 0       | 0       | 4       | 0        | 0        | 0        | 0        | 0        | 0        | Bacteria; Cyanobacteria; Nostocophycideae; Nostocales; Nostocaceae                |
| Otu2171 | 0        | 4       | 3       | 3       | 1       | 0       | 1        | 0        | 2        | 1        | 3        | 0        | Bacteria; Chloroflexi; Anaerolineae; A31                                          |
| Otu2170 | 3        | 0       | 0       | 0       | 0       | 0       | 0        | 0        | 0        | 0        | 0        | 0        | Bacteria; Chloroflexi; TK10                                                       |
| Otu2177 | 1        | 0       | 2       | 1       | 1       | 1       | 1        | 1        | 0        | 3        | 4        | 0        | Bacteria                                                                          |
| Otu2176 | 2        | 0       | 0       | 0       | 0       | 2       | 1        | 0        | 0        | 3        | 0        | 0        | Bacteria; TM7; SC3                                                                |
| Otu2175 | 0        | 0       | 0       | 0       | 0       | 1       | 0        | 0        | 1        | 1        | 0        | 3        | Bacteria; Bacteroidetes; Saprospirae; Saprospirales; Chitinophagaceae             |



| #OTU ID | Z31DSO1r | Z31DSO2 | Z31DSO3 | Z31DSO4 | Z31DSO5 | Z31DSO6 | Z31JDSO1 | Z31JDSO2 | Z31JDSO3 | Z31JDSO4 | Z31JDSO5 | Z31JDSO6 | taxonomy                                                                             |
|---------|----------|---------|---------|---------|---------|---------|----------|----------|----------|----------|----------|----------|--------------------------------------------------------------------------------------|
| Otu2174 | 0        | 2       | 0       | 4       | 2       | 0       | 2        | 2        | 5        | 3        | 0        | 0        | Bacteria; Bacteroidetes; Saprospirae; Saprospirales; Chitinophagaceae                |
| Otu2179 | 2        | 3       | 3       | 0       | 0       | 0       | 0        | 2        | 1        | 1        | 2        | 1        | Bacteria; Verrucomicrobia; Pedosphaerae; Pedosphaerales                              |
| Otu2178 | 0        | 2       | 1       | 0       | 0       | 0       | 0        | 0        | 0        | 0        | 3        | 0        | Bacteria; Planctomycetes; Planctomycetia; Pirellulales; Pirellulaceae                |
| Otu1608 | 3        | 1       | 1       | 9       | 0       | 0       | 4        | 0        | 2        | 4        | 6        | 3        | Bacteria; Proteobacteria; Alphaproteobacteria; Rhodospirillales; Rhodospirillaceae   |
| Otu1600 | 1        | 3       | 2       | 0       | 2       | 2       | 2        | 0        | 2        | 0        | 4        | 1        | Bacteria; Chloroflexi; Anaerolineae; Anaerolineales; Anaerolinaceae; Anaerolinea     |
| Otu1601 | 0        | 1       | 1       | 2       | 0       | 1       | 5        | 0        | 0        | 0        | 1        | 0        | Bacteria; Cyanobacteria; 4C0d-2; MLE1-12                                             |
| Otu1602 | 0        | 1       | 1       | 0       | 2       | 0       | 2        | 0        | 0        | 1        | 4        | 0        | Bacteria; Bacteroidetes; Saprospirae; Saprospirales                                  |
| Otu1603 | 5        | 1       | 0       | 0       | 3       | 0       | 1        | 1        | 2        | 0        | 0        | 0        | Bacteria; Proteobacteria; Deltaproteobacteria; Myxococcales                          |
| Otu1604 | 0        | 0       | 0       | 4       | 0       | 1       | 0        | 1        | 7        | 2        | 1        | 2        | Bacteria; Gemmatimonadetes; Gemmatimonadetes                                         |
| Otu1605 | 1        | 2       | 0       | 2       | 2       | 0       | 1        | 0        | 1        | 2        | 0        | 4        | Bacteria; Proteobacteria; Alphaproteobacteria                                        |
| Otu1606 | 12       | 1       | 3       | 2       | 1       | 2       | 2        | 4        | 0        | 1        | 3        | 1        | Bacteria; Planctomycetes; Planctomycetia; Gemmatales; Gemmataceae; Gemmata           |
| Otu1607 | 14       | 2       | 1       | 5       | 3       | 4       | 6        | 7        | 7        | 2        | 2        | 5        | Bacteria; Proteobacteria                                                             |
| Otu3288 | 7        | 2       | 1       | 14      | 2       | 1       | 5        | 5        | 6        | 4        | 6        | 7        | Bacteria; Bacteroidetes; Saprospirae; Saprospirales; Chitinophagaceae                |
| Otu3289 | 0        | 0       | 1       | 1       | 0       | 2       | 0        | 1        | 1        | 0        | 0        | 0        | Bacteria; OD1; SM2F11                                                                |
| Otu3286 | 3        | 2       | 1       | 1       | 5       | 1       | 0        | 0        | 2        | 1        | 4        | 0        | Bacteria; Acidobacteria; iii1-8; SJA-36                                              |
| Otu549  | 16       | 6       | 16      | 17      | 9       | 10      | 9        | 4        | 5        | 12       | 11       | 4        | Bacteria; Verrucomicrobia; Pedosphaerae; Pedosphaerales                              |
| Otu3284 | 0        | 0       | 1       | 1       | 0       | 0       | 2        | 1        | 1        | 0        | 0        | 0        | Bacteria; Armatimonadetes; Armatimonadia; Armatimonadales; Armatimonadaceae          |
| Otu3285 | 0        | 0       | 0       | 2       | 1       | 0       | 0        | 0        | 0        | 0        | 0        | 0        | Bacteria; Chloroflexi; Anaerolineae; SBR1031; oc28                                   |
| Otu3282 | 0        | 0       | 3       | 0       | 0       | 0       | 0        | 0        | 0        | 0        | 0        | 0        | Bacteria; Proteobacteria; Deltaproteobacteria; Bdellovibrionales; Bacteriovoracaceae |
| Otu3283 | 0        | 0       | 0       | 2       | 0       | 1       | 0        | 2        | 2        | 0        | 0        | 1        | Bacteria; Proteobacteria; Gammaproteobacteria; Xanthomonadales                       |
| Otu3280 | 1        | 0       | 0       | 0       | 0       | 1       | 1        | 2        | 0        | 0        | 1        | 2        | Bacteria; Firmicutes; Clostridia; Clostridiales; Gracilibacteraceae; Gracilibacter   |
| Otu548  | 13       | 8       | 7       | 7       | 7       | 2       | 6        | 4        | 10       | 5        | 23       | 2        | Bacteria; Verrucomicrobia; Spartobacteria; Chthoniobacteriales; Chthoniobacteraceae  |

| #OTU ID | Z31DSO1r | Z31DSO2 | Z31DSO3 | Z31DSO4 | Z31DSO5 | Z31DSO6 | Z31J1DSO1 | Z31J1DSO2 | Z31J1DSO3 | Z31J1DSO4 | Z31J1DSO5 | Z31J1DSO6 | taxonomy                                                                                                     |
|---------|----------|---------|---------|---------|---------|---------|-----------|-----------|-----------|-----------|-----------|-----------|--------------------------------------------------------------------------------------------------------------|
| Otu2018 | 3        | 1       | 1       | 1       | 0       | 1       | 2         | 2         | 1         | 1         | 1         | 0         | Bacteria; Planctomycetes; Planctomycetia; Gemmatales; Gemmataceae; Gemmata                                   |
| Otu1734 | 0        | 1       | 0       | 4       | 0       | 0       | 3         | 3         | 1         | 8         | 4         | 2         | Bacteria; Chloroflexi; TK10; AKYG885; 5B-12                                                                  |
| Otu1735 | 0        | 2       | 0       | 0       | 3       | 0       | 0         | 0         | 0         | 1         | 2         | 0         | Bacteria; GN02; 3BR-5F                                                                                       |
| Otu1736 | 557      | 261     | 347     | 634     | 283     | 285     | 461       | 476       | 557       | 574       | 638       | 426       | Bacteria; Acidobacteria; Acidobacteriia; Acidobacteriales; Koribacteraceae                                   |
| Otu1737 | 0        | 0       | 0       | 1       | 0       | 0       | 0         | 1         | 0         | 3         | 0         | 1         | Bacteria; Planctomycetes; Phycisphaerae; Phycisphaerales                                                     |
| Otu1730 | 0        | 0       | 3       | 0       | 0       | 0       | 0         | 0         | 0         | 0         | 0         | 0         | Bacteria; Chlorobi; SJA-28                                                                                   |
| Otu1731 | 9        | 1       | 1       | 6       | 2       | 2       | 0         | 3         | 6         | 7         | 5         | 8         | Bacteria; Elusimicrobia; Elusimicrobia; I1b                                                                  |
| Otu1732 | 0        | 0       | 0       | 0       | 0       | 0       | 4         | 0         | 2         | 0         | 0         | 0         | Bacteria; Chloroflexi; Ktedonobacteria; Thermogemmatissporales; Thermogemmatissporaceae                      |
| Otu1733 | 3        | 0       | 1       | 0       | 0       | 0       | 1         | 1         | 0         | 0         | 0         | 1         | Bacteria; Proteobacteria; Alphaproteobacteria                                                                |
| Otu2007 | 0        | 2       | 0       | 0       | 1       | 1       | 2         | 1         | 3         | 4         | 1         | 4         | Bacteria; Armatimonadetes; 0319-6E2                                                                          |
| Otu541  | 4        | 13      | 15      | 16      | 13      | 12      | 7         | 9         | 14        | 7         | 22        | 2         | Bacteria; Chloroflexi; Anaerolineae; GCA004                                                                  |
| Otu2005 | 9        | 1       | 5       | 5       | 1       | 2       | 14        | 4         | 4         | 1         | 4         | 2         | Bacteria; Actinobacteria; Actinobacteria; Actinomycetales; Micromonosporaceae; Pilimelia                     |
| Otu2004 | 4        | 0       | 0       | 0       | 0       | 1       | 0         | 0         | 0         | 1         | 0         | 0         | Bacteria; Proteobacteria; Alphaproteobacteria                                                                |
| Otu1738 | 3        | 0       | 0       | 0       | 0       | 0       | 0         | 0         | 0         | 0         | 0         | 0         | Bacteria                                                                                                     |
| Otu1739 | 5        | 4       | 6       | 5       | 6       | 2       | 4         | 5         | 4         | 1         | 7         | 1         | Bacteria; Actinobacteria; Acidimicrobia; Acidimicrobiales                                                    |
| Otu2001 | 0        | 1       | 5       | 1       | 0       | 1       | 1         | 0         | 0         | 7         | 3         | 1         | Bacteria; OP3; koll11                                                                                        |
| Otu540  | 95       | 29      | 13      | 20      | 12      | 6       | 43        | 6         | 8         | 21        | 35        | 15        | Bacteria; Proteobacteria; Alphaproteobacteria; Sphingomonadales; Sphingomonadaceae                           |
| Otu941  | 2        | 2       | 7       | 2       | 9       | 3       | 3         | 0         | 0         | 0         | 2         | 1         | Bacteria; Proteobacteria; Alphaproteobacteria; Rhizobiales; Rhizobiaceae; Agrobacterium; Agrobacterium_vitis |
| Otu940  | 11       | 3       | 3       | 0       | 0       | 0       | 4         | 0         | 0         | 1         | 4         | 0         | Bacteria; Chloroflexi; Thermomicrobia; JG30-KF-CM45                                                          |
| Otu767  | 0        | 1       | 6       | 8       | 3       | 0       | 7         | 2         | 4         | 8         | 11        | 0         | Bacteria; Chlamydiae; Chlamydia; Chlamydiales                                                                |
| Otu942  | 6        | 4       | 5       | 6       | 0       | 10      | 24        | 29        | 5         | 7         | 12        | 28        | Bacteria; TM7; TM7-1                                                                                         |
| Otu761  | 14       | 5       | 3       | 3       | 2       | 3       | 0         | 0         | 1         | 0         | 3         | 1         | Bacteria; Armatimonadetes; Chthonomonadetes; SJA-22                                                          |

| #OTU ID | Z31DSO1r | Z31DSO2 | Z31DSO3 | Z31DSO4 | Z31DSO5 | Z31DSO6 | Z31J1DSO1 | Z31J1DSO2 | Z31J1DSO3 | Z31J1DSO4 | Z31J1DSO5 | Z31J1DSO6 | taxonomy                                                                                           |
|---------|----------|---------|---------|---------|---------|---------|-----------|-----------|-----------|-----------|-----------|-----------|----------------------------------------------------------------------------------------------------|
| Otu2285 | 2        | 1       | 1       | 3       | 0       | 0       | 1         | 1         | 1         | 2         | 0         | 2         | Bacteria; Proteobacteria; Deltaproteobacteria; Bdellovibrionales; Bdellovibrionaceae; Bdellovibrio |
| Otu944  | 14       | 6       | 8       | 11      | 2       | 6       | 8         | 6         | 1         | 2         | 6         | 9         | Bacteria; Armatimonadetes; Fimbriimonadia; Fimbriimonadales; Fimbriimonadaceae; Fimbriimonas       |
| Otu1459 | 1        | 0       | 2       | 2       | 1       | 3       | 4         | 1         | 2         | 2         | 5         | 1         | Bacteria; Cyanobacteria; Chloroplast; Chlorophyta; Chlamydomonadaceae                              |
| Otu1458 | 2        | 2       | 1       | 2       | 0       | 1       | 5         | 1         | 4         | 4         | 5         | 0         | Bacteria; Proteobacteria; Alphaproteobacteria                                                      |
| Otu763  | 3        | 5       | 4       | 8       | 1       | 0       | 13        | 12        | 3         | 1         | 1         | 0         | Bacteria                                                                                           |
| Otu3401 | 2        | 2       | 0       | 0       | 1       | 2       | 0         | 0         | 0         | 0         | 1         | 0         | Bacteria; Proteobacteria; Alphaproteobacteria; Rhodobacterales; Hyphomonadaceae                    |
| Otu1451 | 8        | 5       | 1       | 1       | 2       | 0       | 5         | 0         | 0         | 2         | 0         | 1         | Bacteria; Acidobacteria; Chloracidobacteria; RB41; Ellin6075                                       |
| Otu1450 | 4        | 7       | 0       | 10      | 5       | 6       | 3         | 2         | 4         | 6         | 10        | 7         | Bacteria; Proteobacteria; Deltaproteobacteria; Myxococcales; Polyangiaceae                         |
| Otu1453 | 4        | 1       | 0       | 0       | 0       | 0       | 0         | 0         | 0         | 0         | 0         | 1         | Bacteria; Acidobacteria; TM1                                                                       |
| Otu762  | 7        | 2       | 8       | 8       | 0       | 23      | 4         | 3         | 5         | 6         | 3         | 8         | Bacteria; Verrucomicrobia; Pedosphaerae; Pedosphaerales; Ellin515                                  |
| Otu1455 | 5        | 1       | 1       | 1       | 0       | 2       | 0         | 0         | 0         | 0         | 2         | 0         | Bacteria; Proteobacteria; Deltaproteobacteria; Syntrophobacteriales; Syntrophobacteraceae          |
| Otu1454 | 1        | 1       | 3       | 7       | 1       | 0       | 4         | 2         | 1         | 4         | 4         | 1         | Bacteria; Gemmatimonadetes; Gemmatimonadetes; Gemmatimonadales                                     |
| Otu1457 | 1        | 6       | 1       | 1       | 3       | 1       | 2         | 1         | 3         | 1         | 1         | 0         | Bacteria; Actinobacteria; Actinobacteria; Actinomycetales; Micromonosporaceae; Pilimelia           |
| Otu1456 | 7        | 0       | 1       | 1       | 2       | 1       | 0         | 0         | 0         | 1         | 0         | 1         | Bacteria; BRC1; PRR-11                                                                             |
| Otu2284 | 4        | 3       | 0       | 0       | 0       | 1       | 0         | 0         | 0         | 0         | 1         | 0         | Bacteria; Verrucomicrobia; Verrucomicrobiae; Verrucomicrobiales; Verrucomicrobiaceae               |
| Otu2489 | 15       | 10      | 18      | 25      | 12      | 19      | 27        | 21        | 34        | 27        | 32        | 15        | Bacteria; Actinobacteria; Thermoleophilia; Gaiellales; Gaiellaceae                                 |
| Otu2821 | 1        | 2       | 0       | 0       | 0       | 0       | 0         | 0         | 0         | 0         | 0         | 0         | Bacteria; Verrucomicrobia; Pedosphaerae; Pedosphaerales                                            |
| Otu2820 | 0        | 2       | 0       | 0       | 0       | 0       | 1         | 0         | 0         | 0         | 0         | 0         | Bacteria; TM6; SJA-4                                                                               |
| Otu2823 | 0        | 0       | 1       | 0       | 0       | 0       | 2         | 0         | 0         | 0         | 0         | 0         | Bacteria; Proteobacteria; Alphaproteobacteria; Rhizobiales; Bradyrhizobiaceae                      |
| Otu2488 | 0        | 0       | 0       | 0       | 0       | 0       | 0         | 0         | 3         | 0         | 0         | 0         | Bacteria; Proteobacteria; Deltaproteobacteria; MIZ46                                               |
| Otu2825 | 37       | 38      | 35      | 18      | 50      | 11      | 3         | 3         | 2         | 27        | 46        | 7         | Bacteria; Verrucomicrobia; Pedosphaerae; Pedosphaerales; Ellin517                                  |
| Otu2824 | 4        | 0       | 0       | 1       | 0       | 0       | 0         | 0         | 0         | 0         | 0         | 2         | Bacteria; Gemmatimonadetes; Gemm-3                                                                 |

| #OTU ID | Z31DSO1r | Z31DSO2 | Z31DSO3 | Z31DSO4 | Z31DSO5 | Z31DSO6 | Z31J1DSO1 | Z31J1DSO2 | Z31J1DSO3 | Z31J1DSO4 | Z31J1DSO5 | Z31J1DSO6 | taxonomy                                                                           |
|---------|----------|---------|---------|---------|---------|---------|-----------|-----------|-----------|-----------|-----------|-----------|------------------------------------------------------------------------------------|
| Otu2827 | 0        | 0       | 4       | 1       | 4       | 2       | 2         | 0         | 0         | 2         | 3         | 0         | Bacteria; Chloroflexi; Chloroflexi; Roseiflexales                                  |
| Otu2826 | 7        | 14      | 34      | 39      | 10      | 59      | 15        | 48        | 44        | 15        | 17        | 37        | Bacteria; Verrucomicrobia; Pedosphaerae; Pedosphaerales; Ellin515                  |
| Otu2829 | 2        | 0       | 0       | 2       | 0       | 7       | 0         | 2         | 0         | 3         | 3         | 4         | Bacteria; Actinobacteria; Thermoleophilia; Gaiellales                              |
| Otu2828 | 1        | 2       | 1       | 1       | 0       | 2       | 2         | 2         | 6         | 3         | 3         | 0         | Bacteria; Bacteroidetes; Saprospirae; Saprospirales; Chitinophagaceae              |
| Otu3420 | 1        | 1       | 0       | 0       | 0       | 0       | 0         | 2         | 0         | 0         | 1         | 0         | Bacteria; Proteobacteria; Deltaproteobacteria; FAC87                               |
| Otu3421 | 4        | 3       | 2       | 6       | 1       | 2       | 2         | 2         | 4         | 0         | 1         | 0         | Bacteria; TM6; SJA-4                                                               |
| Otu3426 | 0        | 0       | 1       | 0       | 0       | 3       | 1         | 2         | 1         | 0         | 0         | 0         | Bacteria; Actinobacteria; Actinobacteria; Actinomycetales; Nocardiaceae            |
| Otu3427 | 2        | 1       | 0       | 0       | 0       | 0       | 0         | 0         | 0         | 0         | 0         | 0         | Bacteria; Proteobacteria; Deltaproteobacteria; Myxococcales                        |
| Otu3424 | 2        | 0       | 0       | 0       | 0       | 0       | 0         | 0         | 0         | 0         | 0         | 0         | Bacteria; Planctomycetes; OM190; agg27                                             |
| Otu3425 | 0        | 2       | 0       | 1       | 0       | 0       | 0         | 0         | 0         | 0         | 0         | 0         | Bacteria; Cyanobacteria; Synechococcophycidae; Pseudanabaenales; Pseudanabaenaceae |
| Otu3007 | 2        | 0       | 0       | 0       | 0       | 0       | 1         | 0         | 0         | 0         | 0         | 1         | Bacteria; Proteobacteria                                                           |
| Otu2955 | 2        | 1       | 0       | 0       | 0       | 0       | 1         | 0         | 3         | 0         | 0         | 1         | Bacteria; Proteobacteria; Alphaproteobacteria; Caulobacterales; Caulobacteraceae   |
| Otu2954 | 2        | 0       | 0       | 0       | 0       | 0       | 0         | 0         | 0         | 0         | 0         | 0         | Bacteria; Gemmatimonadetes; Gemm-3                                                 |
| Otu2957 | 0        | 0       | 0       | 1       | 0       | 0       | 0         | 0         | 2         | 1         | 2         | 0         | Bacteria; Armatimonadetes; 0319-6E2                                                |
| Otu2956 | 1        | 0       | 1       | 0       | 0       | 0       | 3         | 0         | 1         | 3         | 3         | 1         | Bacteria; Bacteroidetes; Saprospirae; Saprospirales; Chitinophagaceae              |
| Otu2951 | 3        | 0       | 0       | 0       | 0       | 0       | 0         | 0         | 0         | 0         | 0         | 0         | Bacteria                                                                           |
| Otu2950 | 3        | 2       | 2       | 0       | 5       | 1       | 0         | 0         | 1         | 1         | 1         | 1         | Bacteria; Spirochaetes; Leptospirae; Leptospirales; Leptospiraceae; Turneriella    |
| Otu2953 | 0        | 0       | 0       | 0       | 0       | 0       | 2         | 0         | 0         | 3         | 0         | 1         | Bacteria; Chlamydiae; Chlamydia; Chlamydiales                                      |
| Otu2952 | 0        | 0       | 0       | 2       | 0       | 0       | 0         | 1         | 0         | 0         | 0         | 0         | Bacteria; Proteobacteria; Gammaproteobacteria                                      |
| Otu2959 | 17       | 12      | 5       | 29      | 35      | 15      | 17        | 33        | 39        | 38        | 21        | 56        | Bacteria; Bacteroidetes; Cytophagia; Cytophagales; Cytophagaceae                   |
| Otu2958 | 0        | 0       | 0       | 1       | 0       | 0       | 0         | 0         | 1         | 0         | 1         | 2         | Bacteria; Bacteroidetes; Cytophagia; Cytophagales; Amoebophilaceae                 |
| Otu3400 | 0        | 0       | 0       | 2       | 0       | 0       | 0         | 0         | 1         | 0         | 0         | 1         | Bacteria                                                                           |

| #OTU ID | Z31DSO1r | Z31DSO2 | Z31DSO3 | Z31DSO4 | Z31DSO5 | Z31DSO6 | Z31JDSO1 | Z31JDSO2 | Z31JDSO3 | Z31JDSO4 | Z31JDSO5 | Z31JDSO6 | taxonomy                                                                                                               |
|---------|----------|---------|---------|---------|---------|---------|----------|----------|----------|----------|----------|----------|------------------------------------------------------------------------------------------------------------------------|
| Otu3317 | 1        | 0       | 0       | 2       | 0       | 0       | 0        | 1        | 1        | 2        | 0        | 7        | Bacteria; Proteobacteria; Gammaproteobacteria; Xanthomonadales; Sinobacteraceae; Alkanibacter; Alkanibacter_difficilis |
| Otu2806 | 0        | 0       | 0       | 0       | 0       | 0       | 0        | 1        | 0        | 0        | 2        | 0        | Bacteria; Chloroflexi; Anaerolineae; GCA004                                                                            |
| Otu3402 | 0        | 0       | 1       | 0       | 0       | 0       | 1        | 1        | 1        | 0        | 2        | 2        | Bacteria                                                                                                               |
| Otu2965 | 2        | 0       | 0       | 0       | 0       | 0       | 0        | 0        | 0        | 0        | 0        | 0        | Bacteria; Acidobacteria; Solibacteres; Solibacterales                                                                  |
| Otu3403 | 2        | 1       | 1       | 0       | 1       | 0       | 0        | 0        | 0        | 0        | 4        | 0        | Bacteria; Cyanobacteria; 4C0d-2; MLE1-12                                                                               |
| Otu3404 | 0        | 1       | 0       | 0       | 0       | 0       | 0        | 0        | 0        | 0        | 2        | 0        | Bacteria; Proteobacteria; Alphaproteobacteria; Rhizobiales; Rhodobiaceae; Afifella                                     |
| Otu3405 | 2        | 0       | 0       | 0       | 0       | 1       | 0        | 0        | 1        | 0        | 0        | 0        | Bacteria; Gemmatimonadetes; Gemmatimonadetes                                                                           |
| Otu3406 | 2        | 1       | 1       | 0       | 1       | 0       | 0        | 0        | 0        | 0        | 0        | 1        | Bacteria; Bacteroidetes                                                                                                |
| Otu2800 | 0        | 0       | 0       | 0       | 2       | 0       | 1        | 0        | 0        | 0        | 0        | 0        | Bacteria; Bacteroidetes; Cytophagia; Cytophagales                                                                      |
| Otu2473 | 0        | 1       | 1       | 1       | 0       | 2       | 2        | 1        | 2        | 1        | 1        | 1        | Bacteria                                                                                                               |
| Otu3341 | 0        | 0       | 0       | 0       | 0       | 0       | 0        | 3        | 1        | 0        | 0        | 1        | Bacteria; Proteobacteria; Gammaproteobacteria; Legionellales; Coxiellaceae; Aquicella                                  |
| Otu2779 | 2        | 4       | 10      | 9       | 5       | 6       | 15       | 6        | 8        | 7        | 6        | 3        | Bacteria; Proteobacteria; Alphaproteobacteria; Rhodospirillales; Rhodospirillaceae                                     |
| Otu2778 | 3        | 4       | 0       | 0       | 0       | 0       | 0        | 1        | 0        | 1        | 3        | 0        | Bacteria; Proteobacteria; Deltaproteobacteria; Myxococcales                                                            |
| Otu2771 | 2        | 0       | 0       | 0       | 0       | 0       | 0        | 0        | 0        | 0        | 0        | 0        | Bacteria; Actinobacteria; Thermoleophilia; Gaiellales                                                                  |
| Otu2770 | 2        | 0       | 1       | 2       | 0       | 0       | 0        | 1        | 0        | 0        | 0        | 0        | Bacteria; Proteobacteria; Deltaproteobacteria; MIZ46                                                                   |
| Otu2773 | 1        | 0       | 0       | 2       | 0       | 0       | 0        | 3        | 3        | 2        | 1        | 1        | Bacteria; Bacteroidetes; Saprospirae; Saprospirales                                                                    |
| Otu2772 | 0        | 0       | 1       | 1       | 1       | 0       | 2        | 0        | 2        | 0        | 1        | 0        | Bacteria; TM6; SJA-4                                                                                                   |
| Otu2775 | 0        | 0       | 0       | 0       | 1       | 0       | 1        | 0        | 2        | 0        | 0        | 0        | Bacteria; Chloroflexi; TK17                                                                                            |
| Otu2774 | 1        | 2       | 3       | 6       | 1       | 2       | 0        | 1        | 3        | 1        | 2        | 1        | Bacteria; Proteobacteria; Alphaproteobacteria; Rickettsiales                                                           |
| Otu2777 | 2        | 0       | 1       | 2       | 2       | 3       | 11       | 0        | 5        | 4        | 2        | 1        | Bacteria; Planctomycetes; Planctomycetia; Gemmatales; Isosphaeraceae                                                   |
| Otu2776 | 2        | 0       | 0       | 0       | 0       | 0       | 0        | 1        | 1        | 0        | 1        | 0        | Bacteria; Planctomycetes; BD7-11                                                                                       |
| Otu462  | 5        | 6       | 13      | 17      | 6       | 29      | 4        | 5        | 10       | 2        | 20       | 2        | Bacteria; Chloroflexi; Chloroflexi; Roseiflexales; Kouleothrixaceae                                                    |

| #OTU ID | Z31DSO1r | Z31DSO2 | Z31DSO3 | Z31DSO4 | Z31DSO5 | Z31DSO6 | Z31JDSO1 | Z31JDSO2 | Z31JDSO3 | Z31JDSO4 | Z31JDSO5 | Z31JDSO6 | taxonomy                                                                                      |
|---------|----------|---------|---------|---------|---------|---------|----------|----------|----------|----------|----------|----------|-----------------------------------------------------------------------------------------------|
| Otu463  | 4        | 2       | 10      | 23      | 7       | 10      | 14       | 5        | 18       | 20       | 28       | 5        | Bacteria; Bacteroidetes; Saprospirae; Saprospirales; Chitinophagaceae; Flavisolibacter        |
| Otu460  | 10       | 5       | 1       | 19      | 15      | 14      | 16       | 3        | 18       | 3        | 25       | 1        | Bacteria; Proteobacteria; Gammaproteobacteria; Legionellales; Coxiellaceae; Aquicella         |
| Otu461  | 9        | 7       | 13      | 6       | 11      | 3       | 3        | 1        | 1        | 0        | 24       | 0        | Bacteria; Chloroflexi; Anaerolineae; GCA004                                                   |
| Otu466  | 21       | 5       | 4       | 7       | 7       | 2       | 6        | 0        | 3        | 4        | 9        | 2        | Bacteria; Armatimonadetes; 0319-6E2                                                           |
| Otu467  | 4        | 8       | 20      | 36      | 10      | 10      | 12       | 9        | 9        | 14       | 23       | 8        | Bacteria; Proteobacteria; Gammaproteobacteria; Legionellales; Coxiellaceae; Aquicella         |
| Otu464  | 34       | 9       | 8       | 37      | 11      | 7       | 12       | 19       | 18       | 15       | 10       | 19       | Bacteria; Proteobacteria; Deltaproteobacteria; Myxococcales                                   |
| Otu465  | 15       | 18      | 27      | 94      | 7       | 24      | 81       | 70       | 57       | 42       | 36       | 24       | Bacteria; Bacteroidetes; Saprospirae; Saprospirales; Chitinophagaceae                         |
| Otu468  | 27       | 6       | 8       | 21      | 4       | 9       | 15       | 21       | 6        | 17       | 6        | 8        | Bacteria; Planctomycetes; Phycisphaerae; WD2101                                               |
| Otu469  | 9        | 4       | 11      | 2       | 2       | 3       | 2        | 1        | 0        | 7        | 25       | 0        | Bacteria; Verrucomicrobia; Pedosphaerae; Pedosphaerales; Ellin517                             |
| Otu1149 | 9        | 4       | 2       | 3       | 7       | 2       | 1        | 2        | 11       | 3        | 10       | 1        | Bacteria; OD1; SM2F11                                                                         |
| Otu1148 | 1        | 3       | 11      | 2       | 2       | 2       | 4        | 0        | 4        | 3        | 11       | 2        | Bacteria; Proteobacteria; Gammaproteobacteria; Legionellales; Legionellaceae; Legionella      |
| Otu1143 | 4        | 1       | 3       | 2       | 0       | 1       | 6        | 2        | 5        | 1        | 3        | 0        | Bacteria; Proteobacteria; Alphaproteobacteria; Rhodospirillales; Acetobacteraceae; Roseomonas |
| Otu1142 | 2        | 4       | 0       | 0       | 7       | 2       | 2        | 1        | 2        | 0        | 3        | 0        | Bacteria; Armatimonadetes; Fimbriimonadia; Fimbriimonadales; Fimbriimonadaceae                |
| Otu1141 | 2        | 1       | 0       | 4       | 0       | 0       | 7        | 3        | 0        | 3        | 3        | 4        | Bacteria; Gemmatimonadetes; Gemm-5                                                            |
| Otu1140 | 5        | 0       | 0       | 9       | 2       | 7       | 0        | 0        | 2        | 0        | 9        | 0        | Bacteria; Cyanobacteria                                                                       |
| Otu1147 | 3        | 1       | 2       | 2       | 9       | 0       | 0        | 0        | 4        | 2        | 4        | 1        | Bacteria; Chlamydiae; Chlamydia; Chlamydiales                                                 |
| Otu1146 | 7        | 5       | 1       | 8       | 0       | 1       | 4        | 6        | 1        | 7        | 3        | 0        | Bacteria; Bacteroidetes; Sphingobacteriia; Sphingobacteriales                                 |
| Otu1145 | 0        | 0       | 0       | 7       | 1       | 0       | 0        | 0        | 0        | 0        | 0        | 0        | Bacteria; Bacteroidetes; Cytophagia; Cytophagales                                             |
| Otu1144 | 2        | 1       | 4       | 1       | 2       | 11      | 3        | 4        | 0        | 1        | 5        | 0        | Bacteria; Tenericutes; Mollicutes; Anaeroplasmatales; Anaeroplasmataceae; Asteroleplasma      |
| Otu2483 | 170      | 120     | 51      | 39      | 73      | 14      | 23       | 11       | 12       | 38       | 74       | 17       | Bacteria; Acidobacteria; Acidobacteria-6; iii1-15                                             |
| Otu2482 | 0        | 0       | 0       | 0       | 0       | 0       | 0        | 0        | 2        | 0        | 0        | 0        | Bacteria; Proteobacteria; Gammaproteobacteria; Legionellales                                  |
| Otu608  | 15       | 11      | 2       | 5       | 6       | 5       | 3        | 2        | 1        | 6        | 14       | 2        | Bacteria; Acidobacteria; Acidobacteria-6; iii1-15                                             |

| #OTU ID | Z31DSO1r | Z31DSO2 | Z31DSO3 | Z31DSO4 | Z31DSO5 | Z31DSO6 | Z31JDSO1 | Z31JDSO2 | Z31JDSO3 | Z31JDSO4 | Z31JDSO5 | Z31JDSO6 | taxonomy                                                                                                                |
|---------|----------|---------|---------|---------|---------|---------|----------|----------|----------|----------|----------|----------|-------------------------------------------------------------------------------------------------------------------------|
| Otu609  | 13       | 12      | 16      | 6       | 17      | 1       | 10       | 4        | 2        | 8        | 17       | 4        | Bacteria; Proteobacteria; Deltaproteobacteria; Myxococcales                                                             |
| Otu2487 | 0        | 2       | 0       | 0       | 0       | 0       | 0        | 0        | 0        | 0        | 0        | 0        | Bacteria; Chloroflexi; Anaerolineae; H39                                                                                |
| Otu2486 | 1        | 0       | 1       | 1       | 0       | 0       | 2        | 0        | 0        | 0        | 1        | 0        | Bacteria; Actinobacteria; Actinobacteria; Actinomycetales; Micromonosporaceae; Catellatospora                           |
| Otu2485 | 0        | 0       | 0       | 0       | 0       | 0       | 2        | 0        | 0        | 0        | 0        | 0        | Bacteria; Acidobacteria; Solibacteres; Solibacterales; Solibacteraceae                                                  |
| Otu2484 | 2        | 0       | 0       | 0       | 0       | 0       | 0        | 0        | 0        | 0        | 0        | 0        | Bacteria; Proteobacteria; Deltaproteobacteria                                                                           |
| Otu602  | 30       | 3       | 5       | 13      | 2       | 3       | 10       | 12       | 5        | 15       | 7        | 7        | Bacteria; Gemmatimonadetes; Gemmatimonadetes; Ellin5290                                                                 |
| Otu603  | 29       | 8       | 12      | 6       | 5       | 1       | 7        | 2        | 2        | 4        | 13       | 2        | Bacteria; Proteobacteria; Deltaproteobacteria; Syntrophobacterales; Syntrophobacteraceae                                |
| Otu601  | 15       | 3       | 8       | 7       | 11      | 4       | 6        | 4        | 3        | 1        | 16       | 1        | Bacteria; Chloroflexi; C0119                                                                                            |
| Otu606  | 4        | 0       | 0       | 0       | 0       | 0       | 0        | 0        | 0        | 18       | 0        | 5        | Bacteria; Proteobacteria; Alphaproteobacteria; Caulobacterales; Caulobacteraceae; Brevundimonas; Brevundimonas_diminuta |
| Otu607  | 19       | 7       | 4       | 1       | 6       | 3       | 6        | 2        | 1        | 3        | 7        | 3        | Bacteria; Proteobacteria; Deltaproteobacteria; Syntrophobacterales; Syntrophobacteraceae                                |
| Otu604  | 1        | 1       | 4       | 14      | 5       | 10      | 13       | 10       | 5        | 6        | 24       | 6        | Bacteria; Proteobacteria; Alphaproteobacteria; Rhizobiales; Methylobacteriaceae; Methylobacterium                       |
| Otu605  | 5        | 9       | 7       | 13      | 7       | 4       | 16       | 20       | 15       | 11       | 7        | 17       | Bacteria; Proteobacteria; Deltaproteobacteria; Myxococcales                                                             |
| Otu268  | 118      | 18      | 16      | 52      | 14      | 40      | 83       | 64       | 65       | 65       | 52       | 57       | Bacteria; Proteobacteria; Gammaproteobacteria; Xanthomonadales; Xanthomonadaceae                                        |
| Otu269  | 48       | 14      | 44      | 78      | 28      | 44      | 105      | 76       | 96       | 58       | 80       | 42       | Bacteria; Actinobacteria; Thermoleophilia; Gaiellales; Gaiellaceae                                                      |
| Otu264  | 82       | 62      | 72      | 61      | 38      | 46      | 111      | 68       | 61       | 46       | 86       | 51       | Bacteria; Proteobacteria; Gammaproteobacteria; Xanthomonadales; Sinobacteraceae                                         |
| Otu265  | 35       | 38      | 143     | 126     | 46      | 53      | 118      | 40       | 66       | 26       | 129      | 42       | Bacteria; Actinobacteria; Actinobacteria; Actinomycetales; Nocardioideaceae                                             |
| Otu266  | 33       | 34      | 19      | 21      | 57      | 12      | 15       | 15       | 6        | 17       | 38       | 4        | Bacteria; Acidobacteria; Chloracidobacteria; RB41; Ellin6075                                                            |
| Otu267  | 44       | 51      | 42      | 145     | 26      | 34      | 105      | 79       | 69       | 36       | 68       | 60       | Bacteria; Bacteroidetes; Saprospirae; Saprospirales; Chitinophagaceae                                                   |
| Otu260  | 15       | 23      | 21      | 18      | 47      | 10      | 9        | 6        | 7        | 5        | 29       | 2        | Bacteria; Chloroflexi; Anaerolineae; GCA004                                                                             |
| Otu261  | 22       | 46      | 37      | 18      | 14      | 15      | 10       | 8        | 27       | 8        | 10       | 10       | Bacteria; Proteobacteria; Gammaproteobacteria; Xanthomonadales; Sinobacteraceae; Steroidobacter                         |
| Otu262  | 56       | 19      | 7       | 8       | 9       | 4       | 13       | 7        | 4        | 17       | 23       | 11       | Bacteria; Gemmatimonadetes; Gemmatimonadetes; N1423WL                                                                   |
| Otu263  | 121      | 26      | 14      | 26      | 18      | 17      | 27       | 13       | 19       | 19       | 45       | 11       | Bacteria; Proteobacteria; Betaproteobacteria; SC-I-84                                                                   |

| #OTU ID | Z31DSO1r | Z31DSO2 | Z31DSO3 | Z31DSO4 | Z31DSO5 | Z31DSO6 | Z31JDSO1 | Z31JDSO2 | Z31JDSO3 | Z31JDSO4 | Z31JDSO5 | Z31JDSO6 | taxonomy                                                                                                                  |
|---------|----------|---------|---------|---------|---------|---------|----------|----------|----------|----------|----------|----------|---------------------------------------------------------------------------------------------------------------------------|
| Otu116  | 100      | 65      | 15      | 10      | 16      | 15      | 17       | 7        | 8        | 14       | 44       | 15       | Bacteria; Proteobacteria; Gammaproteobacteria; Xanthomonadales; Sinobacteraceae; Steroidobacter                           |
| Otu117  | 119      | 85      | 52      | 69      | 40      | 56      | 59       | 30       | 45       | 40       | 50       | 44       | Bacteria; Nitrospirae; Nitrospira; Nitrospirales; O319-6A21                                                               |
| Otu114  | 87       | 100     | 256     | 105     | 80      | 143     | 312      | 49       | 78       | 38       | 134      | 54       | Bacteria; Actinobacteria; Actinobacteria; Actinomycetales; Streptomycetaceae; Streptomyces; Streptomyces_mirabilis        |
| Otu115  | 1        | 0       | 3       | 18      | 0       | 11      | 2        | 18       | 1        | 118      | 1        | 0        | Bacteria; Bacteroidetes; Flavobacteriia; Flavobacteriales; Weeksellaceae; Elizabethkingia; Elizabethkingia_meningoseptica |
| Otu112  | 3        | 1       | 15      | 34      | 15      | 107     | 11       | 42       | 35       | 33       | 16       | 8        | Bacteria; Chloroflexi; Anaerolineae; SBR1031; oc28                                                                        |
| Otu113  | 159      | 35      | 30      | 55      | 27      | 32      | 36       | 36       | 37       | 58       | 34       | 23       | Bacteria; Planctomycetes; Phycisphaerae; WD2101                                                                           |
| Otu110  | 203      | 90      | 73      | 127     | 88      | 74      | 124      | 143      | 67       | 169      | 120      | 58       | Bacteria; Acidobacteria; Chloracidobacteria; RB41; Ellin6075                                                              |
| Otu111  | 199      | 92      | 74      | 41      | 56      | 78      | 33       | 16       | 8        | 30       | 80       | 18       | Bacteria; Proteobacteria; Gammaproteobacteria; Xanthomonadales; Sinobacteraceae                                           |
| Otu1855 | 11       | 1       | 0       | 0       | 1       | 0       | 0        | 0        | 0        | 2        | 0        | 0        | Bacteria; Gemmatimonadetes; Gemm-3                                                                                        |
| Otu1854 | 3        | 0       | 0       | 0       | 0       | 0       | 0        | 0        | 0        | 0        | 0        | 0        | Bacteria; Proteobacteria; Deltaproteobacteria; Myxococcales                                                               |
| Otu1857 | 1        | 0       | 0       | 1       | 0       | 0       | 3        | 4        | 2        | 1        | 0        | 4        | Bacteria; Chlamydiae; Chlamydia; Chlamydiales                                                                             |
| Otu1856 | 0        | 0       | 1       | 1       | 1       | 0       | 1        | 0        | 4        | 0        | 0        | 2        | Bacteria; Bacteroidetes; Sphingobacteriia; Sphingobacteriales                                                             |
| Otu1851 | 0        | 0       | 1       | 1       | 4       | 0       | 0        | 0        | 1        | 0        | 0        | 1        | Bacteria; Proteobacteria; Gammaproteobacteria                                                                             |
| Otu1850 | 0        | 0       | 1       | 0       | 3       | 0       | 0        | 0        | 0        | 0        | 0        | 0        | Bacteria; Proteobacteria; Deltaproteobacteria; Myxococcales; Polyangiaceae                                                |
| Otu118  | 67       | 27      | 41      | 103     | 13      | 57      | 79       | 74       | 89       | 83       | 44       | 102      | Bacteria; Gemmatimonadetes; Gemmatimonadetes                                                                              |
| Otu119  | 73       | 26      | 34      | 96      | 16      | 18      | 19       | 19       | 28       | 44       | 11       | 98       | Bacteria; Proteobacteria; Gammaproteobacteria; Pseudomonadales; Pseudomonadaceae; Pseudomonas; Pseudomonas_nitroreducens  |
| Otu286  | 45       | 38      | 57      | 25      | 13      | 22      | 76       | 11       | 20       | 16       | 23       | 21       | Bacteria; Proteobacteria; Alphaproteobacteria; Rhizobiales; Phyllobacteriaceae; Mesorhizobium                             |
| Otu287  | 133      | 46      | 44      | 67      | 30      | 33      | 96       | 86       | 76       | 54       | 50       | 81       | Bacteria; Proteobacteria; Alphaproteobacteria; Ellin329                                                                   |
| Otu284  | 2        | 13      | 17      | 8       | 12      | 1       | 12       | 0        | 35       | 1        | 12       | 0        | Bacteria; Proteobacteria; Deltaproteobacteria; Myxococcales; Cystobacteraceae; Cystobacter                                |
| Otu285  | 15       | 6       | 28      | 13      | 9       | 6       | 60       | 46       | 22       | 12       | 16       | 35       | Bacteria; Acidobacteria; Acidobacteriia; Acidobacteriales; Acidobacteriaceae                                              |
| Otu282  | 11       | 5       | 12      | 59      | 9       | 16      | 24       | 44       | 63       | 55       | 39       | 29       | Bacteria; Proteobacteria; Gammaproteobacteria; Legionellales; Coxiellaceae                                                |
| Otu283  | 6        | 0       | 15      | 24      | 3       | 34      | 9        | 28       | 26       | 53       | 13       | 32       | Bacteria; Chloroflexi; Anaerolineae; SBR1031; oc28                                                                        |



| #OTU ID | Z31DSO1r | Z31DSO2 | Z31DSO3 | Z31DSO4 | Z31DSO5 | Z31DSO6 | Z31JDSO1 | Z31JDSO2 | Z31JDSO3 | Z31JDSO4 | Z31JDSO5 | Z31JDSO6 | taxonomy                                                                                          |
|---------|----------|---------|---------|---------|---------|---------|----------|----------|----------|----------|----------|----------|---------------------------------------------------------------------------------------------------|
| Otu280  | 162      | 68      | 70      | 69      | 55      | 27      | 72       | 22       | 48       | 51       | 104      | 24       | Bacteria; Proteobacteria; Betaproteobacteria                                                      |
| Otu281  | 44       | 0       | 2       | 2       | 0       | 0       | 1        | 1        | 10       | 4        | 1        | 1        | Bacteria; Proteobacteria; Gammaproteobacteria                                                     |
| Otu2397 | 0        | 1       | 1       | 4       | 1       | 1       | 0        | 1        | 1        | 4        | 0        | 1        | Bacteria; Planctomycetes; vadinHA49; DH61                                                         |
| Otu2396 | 0        | 0       | 0       | 0       | 2       | 2       | 0        | 0        | 0        | 0        | 2        | 0        | Bacteria; Cyanobacteria; Chloroplast; Streptophyta                                                |
| Otu2395 | 2        | 0       | 2       | 1       | 0       | 0       | 0        | 1        | 0        | 0        | 2        | 0        | Bacteria; Planctomycetes; Planctomycetia; Gemmatales; Gemmataceae                                 |
| Otu2394 | 5        | 1       | 0       | 1       | 1       | 0       | 0        | 0        | 0        | 1        | 0        | 1        | Bacteria; Chloroflexi; Ktedonobacteria; JG30-KF-AS9                                               |
| Otu2393 | 3        | 0       | 0       | 3       | 3       | 0       | 1        | 0        | 0        | 1        | 3        | 0        | Bacteria; Acidobacteria; Acidobacteria-6; iii1-15                                                 |
| Otu2392 | 3        | 0       | 0       | 0       | 0       | 0       | 0        | 0        | 0        | 0        | 0        | 0        | Bacteria; Planctomycetes; Brocadia; Brocadiiales; Brocadiaceae; Kuenenia; Kuenenia_stuttgariensis |
| Otu288  | 71       | 14      | 13      | 9       | 10      | 6       | 13       | 10       | 8        | 9        | 7        | 8        | Bacteria; Acidobacteria; Solibacteres; Solibacterales; Solibacteraceae; Candidatus_Solibacter     |
| Otu289  | 136      | 43      | 29      | 28      | 14      | 19      | 16       | 21       | 20       | 16       | 62       | 15       | Bacteria; Acidobacteria; iii1-8; 32-20                                                            |
| Otu2551 | 0        | 2       | 0       | 0       | 0       | 0       | 0        | 0        | 0        | 0        | 0        | 0        | Bacteria; Planctomycetes; Planctomycetia; Pirellulales; Pirellulaceae                             |
| Otu2550 | 0        | 0       | 0       | 2       | 0       | 0       | 1        | 0        | 0        | 0        | 0        | 1        | Bacteria; Proteobacteria; Gammaproteobacteria                                                     |
| Otu2553 | 0        | 0       | 1       | 0       | 0       | 1       | 0        | 1        | 0        | 2        | 0        | 2        | Bacteria; Verrucomicrobia; Verrucomicrobiae; Verrucomicrobiales; Verrucomicrobiaceae              |
| Otu2552 | 0        | 0       | 0       | 0       | 0       | 2       | 0        | 1        | 1        | 0        | 0        | 0        | Bacteria; Chloroflexi; Ktedonobacteria; Thermogemmatisporales; Thermogemmatisporaceae             |
| Otu2555 | 2        | 1       | 1       | 4       | 0       | 1       | 4        | 0        | 1        | 1        | 2        | 3        | Bacteria; Planctomycetes; Planctomycetia; Gemmatales; Isosphaeraceae                              |
| Otu2554 | 1        | 0       | 0       | 0       | 0       | 0       | 0        | 0        | 0        | 2        | 0        | 0        | Bacteria; Gemmatimonadetes; Gemmatimonadetes                                                      |
| Otu2557 | 1        | 1       | 0       | 0       | 0       | 0       | 0        | 0        | 0        | 2        | 0        | 2        | Bacteria; Proteobacteria; Betaproteobacteria; A21b; EB1003                                        |
| Otu2556 | 0        | 0       | 0       | 0       | 0       | 0       | 0        | 0        | 0        | 0        | 4        | 0        | Bacteria; Actinobacteria; Actinobacteria; Actinomycetales; Kineosporiaceae; Kineococcus           |
| Otu2559 | 3        | 1       | 1       | 0       | 3       | 1       | 1        | 1        | 0        | 2        | 3        | 0        | Bacteria                                                                                          |
| Otu2558 | 0        | 0       | 0       | 0       | 2       | 0       | 0        | 0        | 0        | 0        | 0        | 0        | Bacteria; Tenericutes; Mollicutes; Anaeroplasmatales; Anaeroplasmataceae; Asteroleplasma          |
| Otu1929 | 3        | 1       | 0       | 0       | 0       | 0       | 0        | 0        | 0        | 0        | 0        | 0        | Bacteria; Acidobacteria                                                                           |
| Otu1928 | 0        | 1       | 4       | 4       | 1       | 0       | 4        | 0        | 5        | 0        | 3        | 2        | Bacteria; Proteobacteria; Alphaproteobacteria; Rhodospirillales; Acetobacteraceae                 |

| #OTU ID | Z31DSO1r | Z31DSO2 | Z31DSO3 | Z31DSO4 | Z31DSO5 | Z31DSO6 | Z31JDSO1 | Z31JDSO2 | Z31JDSO3 | Z31JDSO4 | Z31JDSO5 | Z31JDSO6 | taxonomy                                                                                  |
|---------|----------|---------|---------|---------|---------|---------|----------|----------|----------|----------|----------|----------|-------------------------------------------------------------------------------------------|
| Otu3369 | 2        | 0       | 0       | 0       | 0       | 0       | 0        | 0        | 0        | 0        | 0        | 0        | Bacteria; OD1; ZB2                                                                        |
| Otu3368 | 0        | 0       | 0       | 0       | 0       | 0       | 0        | 0        | 0        | 0        | 2        | 0        | Bacteria                                                                                  |
| Otu1921 | 5        | 4       | 2       | 3       | 0       | 2       | 1        | 0        | 4        | 2        | 3        | 1        | Bacteria; Proteobacteria; Alphaproteobacteria; Rhodospirillales; Rhodospirillaceae        |
| Otu1859 | 3        | 7       | 5       | 2       | 3       | 2       | 1        | 1        | 0        | 3        | 5        | 0        | Bacteria; Armatimonadetes; Chthonomonadetes; SJA-22                                       |
| Otu1923 | 0        | 0       | 1       | 3       | 1       | 1       | 2        | 1        | 4        | 1        | 1        | 1        | Bacteria; Proteobacteria; Alphaproteobacteria; Rhodospirillales; Rhodospirillaceae        |
| Otu1922 | 0        | 0       | 0       | 2       | 0       | 1       | 4        | 2        | 0        | 0        | 1        | 1        | Bacteria; AD3; JG37-AG-4                                                                  |
| Otu1925 | 0        | 0       | 1       | 0       | 1       | 2       | 3        | 0        | 0        | 2        | 7        | 1        | Bacteria; Cyanobacteria; Chloroplast; Chlorophyta; Chlamydomonadaceae                     |
| Otu1924 | 5        | 0       | 0       | 2       | 2       | 1       | 2        | 1        | 1        | 0        | 1        | 1        | Bacteria; Armatimonadetes; Armatimonadia; Armatimonadales; Armatimonadaceae               |
| Otu1927 | 5        | 1       | 2       | 0       | 2       | 1       | 0        | 0        | 0        | 0        | 3        | 0        | Bacteria; Chloroflexi; Anaerolineae; CFB-26                                               |
| Otu1858 | 3        | 0       | 0       | 1       | 0       | 0       | 0        | 0        | 0        | 0        | 0        | 0        | Bacteria; Proteobacteria                                                                  |
| Otu840  | 20       | 2       | 6       | 16      | 3       | 4       | 24       | 11       | 14       | 6        | 12       | 11       | Bacteria; Planctomycetes; Phycisphaerae; WD2101                                           |
| Otu841  | 5        | 8       | 12      | 9       | 8       | 7       | 12       | 0        | 2        | 7        | 14       | 2        | Bacteria; Actinobacteria; MB-A2-108; 0319-7L14                                            |
| Otu842  | 7        | 4       | 2       | 11      | 2       | 0       | 4        | 0        | 4        | 5        | 1        | 1        | Bacteria; Proteobacteria; Gammaproteobacteria; Legionellales                              |
| Otu843  | 22       | 15      | 11      | 14      | 6       | 7       | 7        | 5        | 10       | 8        | 13       | 2        | Bacteria; Bacteroidetes; Saprospirae; Saprospirales; Chitinophagaceae                     |
| Otu844  | 2        | 0       | 3       | 11      | 1       | 3       | 4        | 0        | 5        | 4        | 4        | 4        | Bacteria; Gemmatimonadetes; Gemmatimonadetes                                              |
| Otu845  | 3        | 0       | 3       | 3       | 7       | 13      | 0        | 0        | 6        | 9        | 7        | 0        | Bacteria; Chloroflexi; Anaerolineae; CFB-26                                               |
| Otu846  | 0        | 1       | 6       | 2       | 1       | 10      | 5        | 1        | 11       | 1        | 6        | 4        | Bacteria; Chloroflexi; Ktedonobacteria                                                    |
| Otu847  | 1        | 6       | 5       | 14      | 6       | 1       | 13       | 6        | 14       | 27       | 6        | 30       | Bacteria; Bacteroidetes; Sphingobacteriia; Sphingobacteriales; Sphingobacteriaceae        |
| Otu848  | 6        | 5       | 8       | 8       | 3       | 1       | 16       | 6        | 5        | 4        | 4        | 6        | Bacteria; Acidobacteria; Acidobacteriia; Acidobacteriales; Acidobacteriaceae; Terriglobus |
| Otu849  | 16       | 11      | 1       | 2       | 4       | 0       | 5        | 0        | 0        | 1        | 6        | 1        | Bacteria; Gemmatimonadetes; Gemmatimonadetes; Ellin5290                                   |
| Otu3165 | 0        | 0       | 2       | 0       | 0       | 0       | 4        | 1        | 0        | 1        | 0        | 1        | Bacteria; Actinobacteria; Actinobacteria; Actinomycetales; Nocardiaceae; Nocardia         |
| Otu3164 | 2        | 0       | 0       | 0       | 0       | 0       | 0        | 0        | 0        | 0        | 0        | 0        | Bacteria; Proteobacteria                                                                  |

| #OTU ID | Z31DSO1r | Z31DSO2 | Z31DSO3 | Z31DSO4 | Z31DSO5 | Z31DSO6 | Z31JDSO1 | Z31JDSO2 | Z31JDSO3 | Z31JDSO4 | Z31JDSO5 | Z31JDSO6 | taxonomy                                                                                         |
|---------|----------|---------|---------|---------|---------|---------|----------|----------|----------|----------|----------|----------|--------------------------------------------------------------------------------------------------|
| Otu3163 | 0        | 0       | 0       | 1       | 0       | 0       | 0        | 0        | 0        | 1        | 1        | 2        | Bacteria; OD1; ZB2                                                                               |
| Otu3162 | 2        | 1       | 1       | 0       | 1       | 0       | 0        | 0        | 1        | 3        | 1        | 0        | Bacteria; Chloroflexi; TK17                                                                      |
| Otu3161 | 3        | 3       | 7       | 3       | 2       | 3       | 1        | 2        | 0        | 4        | 4        | 0        | Bacteria; Verrucomicrobia; Spartobacteria; Chthoniobacteriales; Chthoniobacteraceae              |
| Otu3160 | 2        | 0       | 1       | 0       | 0       | 0       | 0        | 0        | 0        | 0        | 0        | 0        | Bacteria; Actinobacteria; Acidimicrobia; Acidimicrobiales; EB1017                                |
| Otu2790 | 1        | 2       | 1       | 1       | 1       | 3       | 1        | 2        | 2        | 2        | 4        | 1        | Bacteria; Chloroflexi; Anaerolineae; SBR1031; oc28                                               |
| Otu3092 | 0        | 1       | 0       | 0       | 1       | 1       | 3        | 0        | 0        | 0        | 1        | 1        | Bacteria; Proteobacteria; Gammaproteobacteria; Legionellales                                     |
| Otu1635 | 5        | 3       | 2       | 5       | 0       | 2       | 3        | 6        | 5        | 1        | 1        | 2        | Bacteria; Armatimonadetes; 0319-6E2                                                              |
| Otu1583 | 7        | 4       | 4       | 9       | 0       | 5       | 4        | 4        | 12       | 7        | 4        | 4        | Bacteria; Proteobacteria; Alphaproteobacteria; Rhodospirillales                                  |
| Otu1637 | 3        | 0       | 3       | 4       | 1       | 2       | 9        | 4        | 1        | 2        | 8        | 3        | Bacteria; Actinobacteria; Acidimicrobia; Acidimicrobiales; EB1017                                |
| Otu1636 | 4        | 1       | 1       | 1       | 1       | 0       | 2        | 1        | 2        | 1        | 3        | 0        | Bacteria; Armatimonadetes; OPB50                                                                 |
| Otu1631 | 0        | 0       | 0       | 1       | 0       | 4       | 0        | 0        | 0        | 0        | 1        | 1        | Bacteria; Proteobacteria; Alphaproteobacteria                                                    |
| Otu1630 | 7        | 2       | 1       | 0       | 1       | 0       | 0        | 0        | 1        | 0        | 1        | 1        | Bacteria; Acidobacteria; Solibacteres; Solibacterales; Solibacteraceae; Candidatus_Solibacter    |
| Otu1582 | 13       | 0       | 2       | 6       | 3       | 1       | 5        | 1        | 3        | 6        | 1        | 3        | Bacteria; Proteobacteria; Alphaproteobacteria; Ellin329                                          |
| Otu2168 | 33       | 16      | 9       | 4       | 7       | 1       | 10       | 2        | 2        | 15       | 15       | 1        | Bacteria; Proteobacteria; Alphaproteobacteria; Sphingomonadales; Sphingomonadaceae; Kaistobacter |
| Otu2169 | 3        | 0       | 0       | 1       | 0       | 0       | 0        | 0        | 0        | 0        | 0        | 0        | Bacteria; Planctomycetes; Pla3                                                                   |
| Otu1852 | 234      | 120     | 77      | 61      | 59      | 43      | 53       | 28       | 35       | 63       | 69       | 17       | Bacteria; Acidobacteria; Acidobacteria-6; iii1-15                                                |
| Otu1639 | 3        | 4       | 1       | 0       | 4       | 0       | 2        | 1        | 2        | 3        | 4        | 0        | Bacteria; Gemmatimonadetes; Gemm-5                                                               |
| Otu1581 | 1        | 2       | 0       | 0       | 0       | 3       | 5        | 1        | 0        | 4        | 0        | 3        | Bacteria; OD1; SM2F11                                                                            |
| Otu1580 | 2        | 0       | 1       | 0       | 4       | 0       | 0        | 0        | 0        | 2        | 3        | 2        | Bacteria; Planctomycetes; Planctomycetia; Gemmatales; Gemmataceae                                |
| Otu2139 | 1        | 1       | 0       | 0       | 2       | 0       | 1        | 0        | 0        | 5        | 1        | 0        | Bacteria; Proteobacteria; Gammaproteobacteria; Legionellales; Coxiellaceae; Aquicella            |
| Otu1587 | 2        | 2       | 4       | 0       | 0       | 0       | 0        | 0        | 1        | 0        | 2        | 0        | Bacteria; Chlorobi; SJA-28                                                                       |
| Otu2138 | 0        | 0       | 0       | 4       | 0       | 0       | 1        | 0        | 0        | 0        | 1        | 0        | Bacteria; Planctomycetes; Phycisphaerae; WD2101                                                  |

| #OTU ID | Z31DSO1r | Z31DSO2 | Z31DSO3 | Z31DSO4 | Z31DSO5 | Z31DSO6 | Z31JDSO1 | Z31JDSO2 | Z31JDSO3 | Z31JDSO4 | Z31JDSO5 | Z31JDSO6 | taxonomy                                                                                             |
|---------|----------|---------|---------|---------|---------|---------|----------|----------|----------|----------|----------|----------|------------------------------------------------------------------------------------------------------|
| Otu1586 | 1        | 1       | 1       | 8       | 0       | 0       | 3        | 4        | 4        | 2        | 0        | 4        | Bacteria; Bacteroidetes; Saprospirae; Saprospirales; Chitinophagaceae                                |
| Otu3119 | 2        | 0       | 0       | 0       | 0       | 0       | 2        | 0        | 0        | 0        | 0        | 0        | Bacteria; Firmicutes; Clostridia; Clostridiales; Ruminococcaceae                                     |
| Otu1585 | 2        | 1       | 1       | 3       | 2       | 6       | 5        | 0        | 3        | 4        | 6        | 1        | Bacteria; Planctomycetes; Planctomycetia; Gemmatales; Isosphaeraceae                                 |
| Otu1584 | 1        | 2       | 0       | 0       | 8       | 1       | 0        | 1        | 0        | 0        | 4        | 0        | Bacteria; Chloroflexi; Anaerolineae; GCA004                                                          |
| Otu2399 | 0        | 0       | 0       | 1       | 0       | 1       | 0        | 2        | 0        | 0        | 0        | 0        | Bacteria; Proteobacteria; Deltaproteobacteria; FAC87                                                 |
| Otu2133 | 0        | 0       | 0       | 3       | 0       | 0       | 0        | 0        | 1        | 0        | 0        | 0        | Bacteria; Chlorobi                                                                                   |
| Otu2398 | 2        | 0       | 0       | 0       | 1       | 0       | 0        | 0        | 0        | 0        | 0        | 0        | Bacteria; Elusimicrobia; Elusimicrobia; I1b                                                          |
| Otu2132 | 0        | 4       | 0       | 2       | 0       | 0       | 0        | 0        | 0        | 0        | 1        | 0        | Bacteria; Actinobacteria; Thermoleophilia; Solirubrobacterales; Patulibacteraceae                    |
| Otu3113 | 0        | 0       | 1       | 0       | 0       | 3       | 0        | 0        | 0        | 0        | 1        | 0        | Bacteria; Proteobacteria; Alphaproteobacteria; Rhodospirillales                                      |
| Otu420  | 35       | 6       | 18      | 20      | 6       | 24      | 20       | 16       | 27       | 17       | 21       | 17       | Bacteria; Armatimonadetes; Chthonomonadetes; SJA-22                                                  |
| Otu1701 | 1        | 1       | 1       | 1       | 0       | 4       | 4        | 2        | 3        | 2        | 3        | 0        | Bacteria; Planctomycetes; Planctomycetia; Gemmatales; Gemmataceae                                    |
| Otu1700 | 3        | 0       | 1       | 0       | 2       | 0       | 3        | 1        | 3        | 3        | 2        | 0        | Bacteria; Actinobacteria; Actinobacteria; Actinomycetales; Micrococcaceae; Sinomonas                 |
| Otu1703 | 2        | 0       | 1       | 0       | 0       | 0       | 0        | 0        | 1        | 3        | 1        | 0        | Bacteria; Bacteroidetes; Saprospirae; Saprospirales; Chitinophagaceae; Chitinophaga                  |
| Otu1702 | 0        | 0       | 3       | 0       | 0       | 0       | 0        | 0        | 0        | 0        | 0        | 0        | Bacteria; Proteobacteria                                                                             |
| Otu1705 | 89       | 40      | 39      | 48      | 39      | 10      | 30       | 11       | 20       | 36       | 75       | 18       | Bacteria; Acidobacteria; Solibacteres; Solibacterales                                                |
| Otu1704 | 1        | 0       | 0       | 0       | 5       | 0       | 1        | 0        | 0        | 0        | 0        | 0        | Bacteria; Proteobacteria; Gammaproteobacteria; Legionellales; Coxiellaceae; Aquicella                |
| Otu1707 | 1        | 2       | 2       | 0       | 2       | 0       | 4        | 1        | 0        | 1        | 2        | 0        | Bacteria; Proteobacteria                                                                             |
| Otu1706 | 2        | 0       | 1       | 6       | 0       | 1       | 5        | 4        | 5        | 5        | 10       | 2        | Bacteria; Proteobacteria; Alphaproteobacteria; Rhodospirillales; Acetobacteraceae                    |
| Otu1709 | 1        | 0       | 1       | 6       | 0       | 0       | 3        | 1        | 0        | 7        | 0        | 0        | Bacteria; Bacteroidetes; Sphingobacteriai; Sphingobacteriales; Sphingobacteriaceae; Sphingobacterium |
| Otu1708 | 1        | 1       | 0       | 3       | 2       | 6       | 2        | 1        | 3        | 1        | 2        | 1        | Bacteria; Proteobacteria; Gammaproteobacteria; Legionellales                                         |
| Otu2016 | 4        | 4       | 2       | 2       | 2       | 2       | 1        | 0        | 1        | 1        | 3        | 0        | Bacteria; Proteobacteria; Alphaproteobacteria                                                        |
| Otu2017 | 3        | 0       | 0       | 0       | 0       | 0       | 0        | 0        | 0        | 3        | 0        | 0        | Bacteria; Acidobacteria; iii1-8; DS-18                                                               |

| #OTU ID | Z31DSO1r | Z31DSO2 | Z31DSO3 | Z31DSO4 | Z31DSO5 | Z31DSO6 | Z31JDSO1 | Z31JDSO2 | Z31JDSO3 | Z31JDSO4 | Z31JDSO5 | Z31JDSO6 | taxonomy                                                                                           |
|---------|----------|---------|---------|---------|---------|---------|----------|----------|----------|----------|----------|----------|----------------------------------------------------------------------------------------------------|
| Otu2011 | 3        | 0       | 3       | 7       | 1       | 3       | 5        | 4        | 6        | 7        | 5        | 2        | Bacteria; Proteobacteria; Deltaproteobacteria; Bdellovibrionales; Bdellovibrionaceae; Bdellovibrio |
| Otu2012 | 0        | 2       | 1       | 3       | 0       | 1       | 1        | 4        | 0        | 0        | 0        | 0        | Bacteria; Proteobacteria; Gammaproteobacteria; Legionellales                                       |
| Otu2013 | 2        | 3       | 0       | 0       | 3       | 0       | 0        | 0        | 0        | 0        | 1        | 0        | Bacteria; Actinobacteria; MB-A2-108; 0319-7L14                                                     |
| Otu3387 | 36       | 8       | 7       | 8       | 6       | 1       | 5        | 2        | 1        | 25       | 12       | 5        | Bacteria; Verrucomicrobia; Spartobacteria; Chthoniobacteriales; Chthoniobacteraceae; DA101         |
| Otu3386 | 2        | 0       | 0       | 0       | 0       | 0       | 0        | 0        | 0        | 0        | 0        | 0        | Bacteria; Proteobacteria; Gammaproteobacteria                                                      |
| Otu3385 | 0        | 0       | 0       | 0       | 1       | 2       | 0        | 0        | 0        | 0        | 1        | 0        | Bacteria; Chloroflexi; Anaerolineae; SBR1031; SHA-31                                               |
| Otu3384 | 0        | 1       | 0       | 2       | 2       | 0       | 0        | 1        | 0        | 0        | 2        | 0        | Bacteria; Actinobacteria; Thermoleophilia; Gaiellales; Gaiellaceae                                 |
| Otu3383 | 1        | 1       | 0       | 0       | 2       | 0       | 0        | 0        | 0        | 0        | 0        | 2        | Bacteria; WS3; PRR-12; Sediment-1; PRR-10                                                          |
| Otu2391 | 2        | 0       | 0       | 0       | 0       | 0       | 0        | 0        | 0        | 0        | 0        | 0        | Bacteria; Proteobacteria; Gammaproteobacteria                                                      |
| Otu3381 | 0        | 0       | 0       | 0       | 0       | 0       | 0        | 0        | 3        | 0        | 0        | 0        | Bacteria; Proteobacteria; Deltaproteobacteria                                                      |
| Otu3380 | 2        | 0       | 0       | 0       | 0       | 0       | 0        | 1        | 0        | 0        | 0        | 0        | Bacteria; Tenericutes; Mollicutes; Anaeroplasmatales; Anaeroplasmataceae; Asteroleplasma           |
| Otu2390 | 1        | 0       | 3       | 1       | 2       | 1       | 1        | 0        | 0        | 0        | 3        | 0        | Bacteria; Chloroflexi; Chloroflexi; Roseiflexales; Kouleothrixaceae                                |
| Otu3389 | 0        | 0       | 1       | 1       | 0       | 1       | 0        | 0        | 0        | 0        | 2        | 0        | Bacteria; Planctomycetes; C6; d113                                                                 |
| Otu3388 | 0        | 0       | 0       | 0       | 0       | 0       | 0        | 0        | 1        | 0        | 0        | 2        | Bacteria; Proteobacteria; Alphaproteobacteria; Rhodospirillales; Acetobacteraceae                  |
| Otu706  | 17       | 6       | 14      | 18      | 8       | 14      | 25       | 8        | 12       | 8        | 18       | 8        | Bacteria; Actinobacteria; Thermoleophilia; Solirubrobacteriales; Patulibacteraceae                 |
| Otu1446 | 11       | 0       | 4       | 4       | 1       | 1       | 3        | 0        | 4        | 1        | 2        | 0        | Bacteria; Acidobacteria; Solibacteres; Solibacteriales                                             |
| Otu1447 | 2        | 3       | 2       | 3       | 1       | 2       | 5        | 5        | 3        | 1        | 8        | 0        | Bacteria; Planctomycetes; Planctomycetia; Gemmatales; Isosphaeraceae                               |
| Otu1444 | 0        | 3       | 3       | 0       | 5       | 0       | 1        | 0        | 1        | 1        | 0        | 0        | Bacteria; Planctomycetes; Planctomycetia; Pirellulales; Pirellulaceae                              |
| Otu1445 | 0        | 2       | 1       | 3       | 0       | 0       | 1        | 4        | 6        | 1        | 1        | 3        | Bacteria; OD1; SM2F11                                                                              |
| Otu1442 | 0        | 3       | 1       | 2       | 1       | 2       | 1        | 1        | 2        | 4        | 4        | 1        | Bacteria; Proteobacteria; Alphaproteobacteria; BD7-3                                               |
| Otu1443 | 0        | 7       | 0       | 1       | 0       | 1       | 2        | 0        | 0        | 0        | 1        | 0        | Bacteria; Chloroflexi; Anaerolineae; SBR1031; oc28                                                 |
| Otu1440 | 4        | 2       | 6       | 1       | 4       | 1       | 0        | 1        | 3        | 0        | 4        | 0        | Bacteria; Acidobacteria; BPC102; B110                                                              |

| #OTU ID | Z31DSO1r | Z31DSO2 | Z31DSO3 | Z31DSO4 | Z31DSO5 | Z31DSO6 | Z31JDSO1 | Z31JDSO2 | Z31JDSO3 | Z31JDSO4 | Z31JDSO5 | Z31JDSO6 | taxonomy                                                                                                   |
|---------|----------|---------|---------|---------|---------|---------|----------|----------|----------|----------|----------|----------|------------------------------------------------------------------------------------------------------------|
| Otu1441 | 6        | 1       | 0       | 2       | 3       | 0       | 1        | 0        | 0        | 0        | 1        | 0        | Bacteria; Planctomycetes; Phycisphaerae; WD2101                                                            |
| Otu1448 | 6        | 4       | 3       | 0       | 2       | 4       | 2        | 0        | 0        | 3        | 0        | 3        | Bacteria; Acidobacteria; EC1113                                                                            |
| Otu1449 | 4        | 0       | 0       | 0       | 0       | 0       | 0        | 0        | 0        | 0        | 0        | 0        | Bacteria; Tenericutes; Mollicutes; Anaeroplasmatales; Anaeroplasmataceae; Asteroleplasma                   |
| Otu2699 | 2        | 0       | 1       | 2       | 0       | 0       | 0        | 0        | 0        | 1        | 0        | 2        | Bacteria; Proteobacteria; Deltaproteobacteria                                                              |
| Otu2413 | 2        | 0       | 0       | 0       | 0       | 0       | 0        | 0        | 0        | 0        | 0        | 0        | Bacteria; Proteobacteria; Deltaproteobacteria; Myxococcales; Polyangiaceae                                 |
| Otu2839 | 0        | 0       | 0       | 0       | 3       | 1       | 0        | 0        | 0        | 0        | 0        | 0        | Bacteria; Cyanobacteria; 4C0d-2; SM1D11                                                                    |
| Otu2836 | 3        | 2       | 4       | 2       | 0       | 2       | 5        | 4        | 6        | 2        | 8        | 5        | Bacteria; Proteobacteria; Alphaproteobacteria; Rhizobiales; Hyphomicrobiaceae                              |
| Otu2837 | 2        | 0       | 0       | 0       | 2       | 1       | 0        | 2        | 1        | 1        | 4        | 0        | Bacteria; FBP                                                                                              |
| Otu2834 | 0        | 0       | 1       | 0       | 0       | 0       | 2        | 1        | 2        | 0        | 4        | 2        | Bacteria; Proteobacteria; Gammaproteobacteria; Xanthomonadales; Sinobacteraceae                            |
| Otu2835 | 1        | 1       | 3       | 0       | 0       | 1       | 3        | 1        | 1        | 1        | 2        | 0        | Bacteria; Chloroflexi; C0119                                                                               |
| Otu2832 | 2        | 0       | 0       | 0       | 0       | 0       | 0        | 0        | 0        | 0        | 1        | 0        | Bacteria; BRC1; PRR-11                                                                                     |
| Otu2833 | 0        | 3       | 0       | 1       | 0       | 0       | 0        | 0        | 0        | 0        | 1        | 0        | Bacteria; Planctomycetes; 028H05-P-BN-P5                                                                   |
| Otu2830 | 2        | 0       | 0       | 0       | 0       | 0       | 0        | 0        | 0        | 0        | 0        | 0        | Bacteria; Planctomycetes; Phycisphaerae; WD2101                                                            |
| Otu2831 | 3        | 0       | 0       | 2       | 1       | 0       | 0        | 0        | 0        | 4        | 1        | 1        | Bacteria; OD1; ZB2                                                                                         |
| Otu2942 | 0        | 2       | 0       | 0       | 0       | 0       | 0        | 0        | 0        | 0        | 0        | 0        | Bacteria; Acidobacteria                                                                                    |
| Otu2943 | 0        | 0       | 0       | 0       | 0       | 0       | 0        | 0        | 2        | 0        | 2        | 0        | Bacteria; OD1; ZB2                                                                                         |
| Otu2940 | 1        | 3       | 0       | 1       | 0       | 0       | 0        | 0        | 0        | 1        | 1        | 0        | Bacteria; Proteobacteria; Deltaproteobacteria; Syntrophobacteriales; Syntrophobacteraceae; Syntrophobacter |
| Otu2941 | 117      | 58      | 51      | 100     | 56      | 43      | 45       | 67       | 66       | 107      | 105      | 69       | Bacteria; Verrucomicrobia; Pedosphaerae; Pedosphaerales; Ellin517                                          |
| Otu2946 | 3        | 3       | 0       | 0       | 1       | 0       | 0        | 0        | 0        | 0        | 1        | 0        | Bacteria; Planctomycetes; Phycisphaerae; WD2101                                                            |
| Otu2947 | 1        | 2       | 2       | 1       | 0       | 0       | 2        | 2        | 1        | 0        | 1        | 0        | Bacteria; Armatimonadetes; 0319-6E2                                                                        |
| Otu2944 | 0        | 0       | 1       | 0       | 1       | 3       | 0        | 0        | 0        | 0        | 2        | 1        | Bacteria; Proteobacteria; Deltaproteobacteria                                                              |
| Otu2945 | 0        | 2       | 0       | 0       | 0       | 0       | 0        | 0        | 1        | 0        | 1        | 0        | Bacteria; Actinobacteria; Actinobacteria; Actinomycetales; Thermomonosporaceae; Actinocorallia             |

| #OTU ID | Z31DSO1r | Z31DSO2 | Z31DSO3 | Z31DSO4 | Z31DSO5 | Z31DSO6 | Z31J1DSO1 | Z31J1DSO2 | Z31J1DSO3 | Z31J1DSO4 | Z31J1DSO5 | Z31J1DSO6 | taxonomy                                                                                   |
|---------|----------|---------|---------|---------|---------|---------|-----------|-----------|-----------|-----------|-----------|-----------|--------------------------------------------------------------------------------------------|
| Otu2948 | 0        | 0       | 0       | 0       | 0       | 1       | 0         | 2         | 2         | 0         | 2         | 0         | Bacteria; Proteobacteria; Deltaproteobacteria; Myxococcales                                |
| Otu2949 | 2        | 0       | 0       | 0       | 0       | 0       | 0         | 0         | 0         | 0         | 0         | 0         | Bacteria                                                                                   |
| Otu538  | 9        | 2       | 3       | 12      | 6       | 0       | 18        | 6         | 18        | 3         | 17        | 1         | Bacteria; Chlamydiae; Chlamydiia; Chlamydiales                                             |
| Otu539  | 115      | 42      | 34      | 44      | 28      | 29      | 42        | 39        | 29        | 60        | 54        | 30        | Bacteria; Acidobacteria; Acidobacteria-6; iii1-15                                          |
| Otu2262 | 3        | 9       | 6       | 1       | 1       | 1       | 6         | 1         | 0         | 3         | 3         | 1         | Bacteria; Proteobacteria; Alphaproteobacteria; Rhizobiales                                 |
| Otu2617 | 0        | 0       | 0       | 3       | 0       | 0       | 0         | 0         | 0         | 0         | 1         | 0         | Bacteria; Bacteroidetes; Cytophagia; Cytophagales                                          |
| Otu2766 | 2        | 0       | 0       | 0       | 1       | 0       | 0         | 0         | 0         | 0         | 0         | 0         | Bacteria; Actinobacteria; Acidimicrobia; Acidimicrobiales; EB1017                          |
| Otu2767 | 0        | 2       | 0       | 0       | 0       | 0       | 1         | 1         | 0         | 0         | 0         | 0         | Bacteria; Firmicutes; Clostridia; OPB54                                                    |
| Otu2764 | 0        | 1       | 1       | 0       | 0       | 1       | 1         | 0         | 0         | 1         | 0         | 2         | Bacteria                                                                                   |
| Otu2765 | 0        | 0       | 2       | 0       | 0       | 0       | 0         | 0         | 0         | 0         | 0         | 0         | Bacteria; Chlamydiae; Chlamydiia; Chlamydiales                                             |
| Otu2762 | 3        | 2       | 0       | 0       | 0       | 0       | 0         | 0         | 0         | 0         | 1         | 0         | Bacteria; Bacteroidetes; Saprospirae; Saprospirales; Chitinophagaceae                      |
| Otu2763 | 0        | 2       | 1       | 3       | 1       | 0       | 3         | 0         | 0         | 0         | 1         | 2         | Bacteria; Bacteroidetes; Sphingobacteriia; Sphingobacteriales                              |
| Otu2760 | 0        | 2       | 0       | 0       | 1       | 0       | 0         | 0         | 0         | 0         | 0         | 1         | Bacteria; Chlamydiae; Chlamydiia; Chlamydiales                                             |
| Otu2761 | 0        | 0       | 0       | 0       | 0       | 0       | 2         | 0         | 0         | 0         | 0         | 0         | Bacteria; Proteobacteria; Betaproteobacteria                                               |
| Otu530  | 54       | 30      | 38      | 33      | 15      | 30      | 80        | 21        | 19        | 15        | 46        | 20        | Bacteria; Actinobacteria; Actinobacteria; Actinomycetales; Mycobacteriaceae; Mycobacterium |
| Otu2768 | 1        | 0       | 1       | 1       | 1       | 2       | 1         | 1         | 1         | 0         | 5         | 1         | Bacteria; Firmicutes; Clostridia; Clostridiales; Clostridiaceae; Clostridium               |
| Otu531  | 6        | 12      | 20      | 25      | 17      | 27      | 11        | 12        | 21        | 11        | 20        | 10        | Bacteria; Proteobacteria; Deltaproteobacteria; Myxococcales                                |
| Otu471  | 22       | 23      | 28      | 23      | 15      | 17      | 14        | 27        | 43        | 18        | 25        | 18        | Bacteria; Bacteroidetes; Saprospirae; Saprospirales; Chitinophagaceae                      |
| Otu470  | 25       | 12      | 9       | 5       | 12      | 6       | 6         | 5         | 4         | 13        | 16        | 12        | Bacteria; Acidobacteria; Acidobacteria-5                                                   |
| Otu473  | 70       | 18      | 13      | 15      | 18      | 4       | 16        | 3         | 5         | 6         | 16        | 4         | Bacteria; Planctomycetes; Phycisphaerae; WD2101                                            |
| Otu472  | 26       | 5       | 3       | 1       | 1       | 1       | 5         | 2         | 8         | 2         | 2         | 3         | Bacteria; Gemmatimonadetes; Gemmatimonadetes; N1423WL                                      |
| Otu475  | 13       | 12      | 24      | 11      | 9       | 9       | 8         | 1         | 1         | 8         | 12        | 3         | Bacteria; Acidobacteria; Chloracidobacteria; RB41; Ellin6075                               |

| #OTU ID | Z31DSO1r | Z31DSO2 | Z31DSO3 | Z31DSO4 | Z31DSO5 | Z31DSO6 | Z31JDSO1 | Z31JDSO2 | Z31JDSO3 | Z31JDSO4 | Z31JDSO5 | Z31JDSO6 | taxonomy                                                                                                          |
|---------|----------|---------|---------|---------|---------|---------|----------|----------|----------|----------|----------|----------|-------------------------------------------------------------------------------------------------------------------|
| Otu474  | 17       | 16      | 16      | 10      | 8       | 5       | 6        | 2        | 7        | 2        | 26       | 3        | Bacteria; Chloroflexi; Anaerolineae; Anaerolineales; Anaerolinaceae                                               |
| Otu477  | 31       | 19      | 12      | 45      | 20      | 40      | 10       | 2        | 39       | 23       | 38       | 7        | Bacteria; Proteobacteria; Betaproteobacteria; Rhodocyclales; Rhodocyclaceae; Dechloromonas                        |
| Otu476  | 56       | 12      | 7       | 5       | 3       | 2       | 3        | 0        | 0        | 3        | 9        | 1        | Bacteria; Acidobacteria; Acidobacteria-6; iii1-15; mb2424                                                         |
| Otu479  | 9        | 10      | 12      | 14      | 9       | 9       | 36       | 8        | 15       | 11       | 15       | 15       | Bacteria; Proteobacteria; Alphaproteobacteria; Rhodospirillales; Rhodospirillaceae                                |
| Otu478  | 44       | 29      | 16      | 30      | 10      | 39      | 20       | 21       | 38       | 22       | 28       | 32       | Bacteria; Proteobacteria; Deltaproteobacteria; Myxococcales                                                       |
| Otu1158 | 3        | 2       | 1       | 2       | 6       | 0       | 3        | 0        | 0        | 0        | 6        | 1        | Bacteria; Proteobacteria; Deltaproteobacteria; Myxococcales; Polyangiaceae                                        |
| Otu1159 | 3        | 1       | 1       | 4       | 1       | 1       | 3        | 1        | 2        | 0        | 8        | 1        | Bacteria; Chloroflexi; C0119                                                                                      |
| Otu1150 | 1        | 0       | 0       | 1       | 2       | 1       | 1        | 0        | 6        | 1        | 0        | 51       | Bacteria; Firmicutes; Bacilli; Bacillales; Paenibacillaceae; Paenibacillus                                        |
| Otu1151 | 8        | 2       | 2       | 1       | 2       | 0       | 0        | 0        | 0        | 0        | 0        | 0        | Bacteria; Proteobacteria; Gammaproteobacteria; Xanthomonadales; Sinobacteraceae                                   |
| Otu1152 | 14       | 6       | 4       | 4       | 7       | 5       | 11       | 2        | 2        | 16       | 3        | 4        | Bacteria; Acidobacteria; Acidobacteria-6; iii1-15; RB40                                                           |
| Otu1153 | 203      | 121     | 83      | 145     | 81      | 107     | 131      | 122      | 175      | 170      | 168      | 119      | Bacteria; Proteobacteria; Betaproteobacteria; MND1                                                                |
| Otu1154 | 7        | 2       | 4       | 3       | 3       | 3       | 11       | 1        | 1        | 3        | 16       | 2        | Bacteria; Actinobacteria; Actinobacteria; Actinomycetales; Nocardioidaceae                                        |
| Otu1155 | 1        | 3       | 4       | 2       | 1       | 3       | 6        | 0        | 1        | 8        | 5        | 0        | Bacteria; Verrucomicrobia; Spartobacteria; Chthoniobacteriales; Chthoniobacteraceae; Candidatus_Xiphinematobacter |
| Otu1156 | 1        | 7       | 2       | 3       | 6       | 2       | 5        | 2        | 1        | 1        | 8        | 2        | Bacteria; Chloroflexi; Anaerolineae; SBR1031; oc28                                                                |
| Otu1157 | 49       | 19      | 16      | 23      | 21      | 16      | 29       | 11       | 22       | 12       | 46       | 8        | Bacteria; Acidobacteria; Acidobacteria-6; iii1-15                                                                 |
| Otu619  | 11       | 12      | 5       | 14      | 5       | 14      | 6        | 14       | 13       | 18       | 11       | 14       | Bacteria; Acidobacteria; Acidobacteria-5                                                                          |
| Otu618  | 9        | 1       | 2       | 16      | 2       | 1       | 5        | 4        | 7        | 11       | 11       | 15       | Bacteria; Cyanobacteria; 4C0d-2; MLE1-12                                                                          |
| Otu2492 | 3        | 6       | 2       | 1       | 8       | 3       | 1        | 0        | 1        | 0        | 1        | 1        | Bacteria; Bacteroidetes; Saprospirae; Saprospirales; Chitinophagaceae                                             |
| Otu2493 | 0        | 1       | 1       | 4       | 1       | 0       | 0        | 0        | 0        | 2        | 0        | 0        | Bacteria; Bacteroidetes; Saprospirae; Saprospirales; Chitinophagaceae                                             |
| Otu2494 | 0        | 0       | 0       | 0       | 0       | 0       | 0        | 0        | 0        | 2        | 0        | 0        | Bacteria; Proteobacteria; Deltaproteobacteria; Spirobacillales                                                    |
| Otu2495 | 0        | 0       | 0       | 2       | 1       | 0       | 0        | 0        | 0        | 0        | 1        | 0        | Bacteria; Proteobacteria; Gammaproteobacteria                                                                     |
| Otu2496 | 0        | 0       | 0       | 3       | 1       | 0       | 0        | 0        | 0        | 0        | 1        | 0        | Bacteria; Proteobacteria; Gammaproteobacteria; Legionellales; Coxiellaceae; Aquicella                             |



| #OTU ID | Z31DSO1r | Z31DSO2 | Z31DSO3 | Z31DSO4 | Z31DSO5 | Z31DSO6 | Z31JDSO1 | Z31JDSO2 | Z31JDSO3 | Z31JDSO4 | Z31JDSO5 | Z31JDSO6 | taxonomy                                                                                     |
|---------|----------|---------|---------|---------|---------|---------|----------|----------|----------|----------|----------|----------|----------------------------------------------------------------------------------------------|
| Otu2497 | 3        | 5       | 12      | 10      | 6       | 5       | 6        | 2        | 12       | 9        | 12       | 2        | Bacteria; Proteobacteria; Gammaproteobacteria; Legionellales; Coxiellaceae; Aquicella        |
| Otu611  | 21       | 3       | 0       | 3       | 5       | 2       | 5        | 2        | 7        | 0        | 5        | 3        | Bacteria; Planctomycetes; Planctomycetia; Pirellulales; Pirellulaceae                        |
| Otu610  | 18       | 8       | 2       | 2       | 5       | 0       | 6        | 1        | 1        | 0        | 2        | 1        | Bacteria; Actinobacteria; Actinobacteria; Actinomycetales                                    |
| Otu613  | 2        | 3       | 10      | 8       | 3       | 9       | 20       | 2        | 8        | 23       | 6        | 7        | Bacteria; Proteobacteria; Gammaproteobacteria; Legionellales; Coxiellaceae                   |
| Otu612  | 9        | 16      | 3       | 6       | 0       | 1       | 10       | 0        | 0        | 17       | 21       | 0        | Bacteria; Bacteroidetes; Saprospirae; Saprospirales; Chitinophagaceae; Flavisolibacter       |
| Otu615  | 0        | 1       | 4       | 3       | 0       | 3       | 3        | 5        | 4        | 7        | 0        | 28       | Bacteria; Actinobacteria; Actinobacteria; Actinomycetales; Pseudonocardiaceae; Amycolatopsis |
| Otu614  | 17       | 4       | 7       | 25      | 7       | 10      | 11       | 8        | 9        | 22       | 12       | 4        | Bacteria; Planctomycetes; Phycisphaerae; WD2101                                              |
| Otu617  | 14       | 2       | 3       | 12      | 0       | 3       | 7        | 11       | 9        | 11       | 3        | 7        | Bacteria; WPS-2                                                                              |
| Otu616  | 10       | 18      | 4       | 10      | 8       | 2       | 6        | 1        | 3        | 2        | 9        | 1        | Bacteria; Bacteroidetes; Saprospirae; Saprospirales; Chitinophagaceae                        |
| Otu3206 | 2        | 0       | 0       | 2       | 1       | 1       | 3        | 2        | 1        | 0        | 1        | 0        | Bacteria; Proteobacteria; Deltaproteobacteria; Myxococcales                                  |
| Otu279  | 3        | 0       | 4       | 11      | 2       | 0       | 0        | 7        | 4        | 49       | 0        | 0        | Bacteria; Bacteroidetes; Flavobacteriia; Flavobacteriales; Flavobacteriaceae; Flavobacterium |
| Otu278  | 104      | 30      | 18      | 29      | 16      | 15      | 14       | 15       | 6        | 28       | 28       | 14       | Bacteria; Planctomycetes; Phycisphaerae; WD2101                                              |
| Otu273  | 13       | 4       | 10      | 29      | 12      | 10      | 16       | 17       | 27       | 51       | 20       | 31       | Bacteria; Proteobacteria; Betaproteobacteria; Methylophilales                                |
| Otu272  | 23       | 10      | 20      | 34      | 9       | 33      | 61       | 58       | 46       | 21       | 45       | 18       | Bacteria; Chloroflexi; Ktedonobacteria; Ktedonobacteriales; Ktedonobacteraceae               |
| Otu271  | 68       | 14      | 15      | 26      | 13      | 24      | 24       | 22       | 27       | 21       | 36       | 13       | Bacteria; Acidobacteria; Acidobacteria-6; iii1-15                                            |
| Otu270  | 25       | 6       | 28      | 27      | 30      | 24      | 8        | 3        | 12       | 75       | 28       | 0        | Bacteria; Chloroflexi; Anaerolineae; CFB-26                                                  |
| Otu277  | 48       | 39      | 34      | 20      | 14      | 19      | 37       | 41       | 48       | 44       | 31       | 36       | Bacteria; Acidobacteria; Solibacteres; Solibacterales                                        |
| Otu276  | 10       | 3       | 8       | 46      | 5       | 9       | 16       | 15       | 21       | 10       | 5        | 16       | Bacteria; Armatimonadetes; Fimbriimonadia; Fimbriimonadales; Fimbriimonadaceae               |
| Otu275  | 34       | 15      | 30      | 46      | 24      | 13      | 38       | 5        | 9        | 46       | 30       | 10       | Bacteria; Proteobacteria; Gammaproteobacteria; Legionellales; Coxiellaceae                   |
| Otu274  | 31       | 14      | 43      | 62      | 16      | 42      | 94       | 58       | 53       | 83       | 48       | 60       | Bacteria; Acidobacteria; Solibacteres; Solibacterales; Solibacteraceae                       |
| Otu105  | 114      | 45      | 69      | 128     | 69      | 100     | 80       | 89       | 59       | 160      | 99       | 62       | Bacteria; Planctomycetes; Phycisphaerae; WD2101                                              |
| Otu104  | 273      | 81      | 80      | 155     | 76      | 79      | 149      | 104      | 98       | 128      | 144      | 61       | Bacteria; Proteobacteria; Betaproteobacteria; SC-I-84                                        |

| #OTU ID | Z31DSO1r | Z31DSO2 | Z31DSO3 | Z31DSO4 | Z31DSO5 | Z31DSO6 | Z31JDSO1 | Z31JDSO2 | Z31JDSO3 | Z31JDSO4 | Z31JDSO5 | Z31JDSO6 | taxonomy                                                                                      |
|---------|----------|---------|---------|---------|---------|---------|----------|----------|----------|----------|----------|----------|-----------------------------------------------------------------------------------------------|
| Otu107  | 149      | 64      | 75      | 82      | 42      | 99      | 57       | 46       | 77       | 79       | 52       | 27       | Bacteria; Proteobacteria; Deltaproteobacteria; Myxococcales                                   |
| Otu106  | 949      | 358     | 371     | 470     | 387     | 181     | 571      | 234      | 255      | 519      | 576      | 293      | Bacteria; Proteobacteria; Betaproteobacteria; Burkholderiales; Comamonadaceae; Methylibium    |
| Otu101  | 271      | 114     | 88      | 269     | 100     | 155     | 163      | 97       | 84       | 217      | 157      | 78       | Bacteria; Bacteroidetes; Saprospirae; Saprospirales; Chitinophagaceae                         |
| Otu100  | 84       | 23      | 66      | 146     | 37      | 46      | 87       | 56       | 72       | 121      | 98       | 76       | Bacteria; Acidobacteria; Acidobacteriia; Acidobacteriales; Koribacteraceae                    |
| Otu103  | 133      | 57      | 77      | 124     | 29      | 105     | 221      | 108      | 164      | 186      | 104      | 117      | Bacteria; Proteobacteria; Betaproteobacteria; Burkholderiales; Burkholderiaceae; Burkholderia |
| Otu102  | 125      | 68      | 29      | 41      | 20      | 45      | 33       | 21       | 8        | 41       | 61       | 26       | Bacteria; Proteobacteria; Gammaproteobacteria; Xanthomonadales; Xanthomonadaceae; Luteimonas  |
| Otu1842 | 16       | 11      | 14      | 15      | 17      | 10      | 11       | 6        | 4        | 50       | 23       | 13       | Bacteria; Planctomycetes; Phycisphaerae; WD2101                                               |
| Otu1843 | 3        | 1       | 0       | 0       | 1       | 0       | 0        | 0        | 0        | 0        | 0        | 0        | Bacteria; WS3; PRR-12; Sediment-1; PRR-10                                                     |
| Otu1840 | 0        | 3       | 0       | 0       | 1       | 0       | 0        | 0        | 0        | 0        | 0        | 0        | Bacteria; Proteobacteria; TA18; CV90                                                          |
| Otu1841 | 0        | 0       | 0       | 0       | 0       | 0       | 3        | 1        | 0        | 0        | 0        | 0        | Bacteria; Proteobacteria; Gammaproteobacteria; Legionellales                                  |
| Otu109  | 105      | 70      | 51      | 102     | 61      | 66      | 84       | 53       | 64       | 77       | 102      | 66       | Bacteria; Gemmatimonadetes; Gemm-1                                                            |
| Otu108  | 221      | 72      | 111     | 222     | 62      | 110     | 188      | 175      | 168      | 173      | 159      | 144      | Bacteria; Acidobacteria; Acidobacteriia; Acidobacteriales; Acidobacteriaceae                  |
| Otu1844 | 0        | 0       | 0       | 0       | 0       | 0       | 0        | 0        | 4        | 2        | 0        | 0        | Bacteria; Bacteroidetes; Sphingobacteriia; Sphingobacteriales                                 |
| Otu1845 | 3        | 8       | 3       | 2       | 3       | 0       | 4        | 0        | 2        | 4        | 3        | 3        | Bacteria; Proteobacteria; Alphaproteobacteria; Rhodospirillales; Rhodospirillaceae            |
| Otu295  | 46       | 20      | 17      | 36      | 18      | 34      | 42       | 29       | 18       | 27       | 15       | 12       | Bacteria; Proteobacteria; Deltaproteobacteria; Myxococcales                                   |
| Otu294  | 23       | 9       | 5       | 21      | 5       | 13      | 89       | 46       | 41       | 14       | 11       | 18       | Bacteria; Proteobacteria; Gammaproteobacteria                                                 |
| Otu297  | 34       | 15      | 11      | 40      | 77      | 51      | 6        | 13       | 34       | 21       | 31       | 43       | Bacteria; Proteobacteria; Betaproteobacteria; Neisseriales; Neisseriaceae; Chromobacterium    |
| Otu296  | 5        | 0       | 8       | 17      | 4       | 20      | 7        | 13       | 43       | 2        | 2        | 6        | Bacteria; Proteobacteria; Alphaproteobacteria; Rhodospirillales; Rhodospirillaceae            |
| Otu291  | 37       | 22      | 23      | 46      | 14      | 31      | 50       | 32       | 38       | 33       | 33       | 31       | Bacteria; Proteobacteria; Alphaproteobacteria; Rhodospirillales; Rhodospirillaceae            |
| Otu290  | 26       | 12      | 40      | 21      | 13      | 5       | 54       | 15       | 23       | 15       | 34       | 12       | Bacteria; Proteobacteria; Betaproteobacteria; Burkholderiales; Burkholderiaceae; Burkholderia |
| Otu293  | 18       | 4       | 25      | 49      | 12      | 14      | 38       | 27       | 16       | 56       | 22       | 25       | Bacteria; Proteobacteria; Gammaproteobacteria; Legionellales; Coxiellaceae                    |
| Otu292  | 14       | 11      | 23      | 28      | 22      | 9       | 43       | 23       | 31       | 31       | 54       | 26       | Bacteria; Actinobacteria; Thermoleophilia; Gaiellales; Gaiellaceae                            |

| #OTU ID | Z31DSO1r | Z31DSO2 | Z31DSO3 | Z31DSO4 | Z31DSO5 | Z31DSO6 | Z31J1DSO1 | Z31J1DSO2 | Z31J1DSO3 | Z31J1DSO4 | Z31J1DSO5 | Z31J1DSO6 | taxonomy                                                                              |
|---------|----------|---------|---------|---------|---------|---------|-----------|-----------|-----------|-----------|-----------|-----------|---------------------------------------------------------------------------------------|
| Otu2384 | 1        | 0       | 0       | 0       | 1       | 0       | 2         | 0         | 0         | 0         | 0         | 0         | Bacteria; Chlamydiae; Chlamydiia; Chlamydiales; Parachlamydiaceae                     |
| Otu2385 | 2        | 0       | 0       | 0       | 0       | 0       | 0         | 0         | 0         | 0         | 0         | 0         | Bacteria; Cyanobacteria                                                               |
| Otu2386 | 0        | 4       | 1       | 0       | 0       | 0       | 0         | 0         | 0         | 0         | 1         | 0         | Bacteria; Bacteroidetes; Sphingobacteriia; Sphingobacteriales                         |
| Otu2292 | 0        | 0       | 0       | 1       | 0       | 0       | 2         | 0         | 0         | 0         | 0         | 0         | Bacteria; Proteobacteria; Deltaproteobacteria; MIZ46                                  |
| Otu299  | 1        | 11      | 18      | 20      | 6       | 46      | 17        | 16        | 30        | 18        | 21        | 18        | Bacteria; Actinobacteria; Actinobacteria; Actinomycetales; Micromonosporaceae         |
| Otu298  | 45       | 6       | 11      | 24      | 9       | 41      | 24        | 11        | 24        | 15        | 16        | 9         | Bacteria; Chloroflexi; Ktedonobacteria; JG30-KF-AS9                                   |
| Otu2382 | 2        | 0       | 0       | 0       | 0       | 0       | 0         | 0         | 0         | 0         | 0         | 0         | Bacteria; Planctomycetes; Phycisphaerae; WD2101                                       |
| Otu2383 | 3        | 0       | 0       | 0       | 2       | 0       | 1         | 2         | 1         | 2         | 1         | 0         | Bacteria; OD1; SM2F11                                                                 |
| Otu3017 | 3        | 0       | 0       | 0       | 0       | 0       | 0         | 0         | 0         | 0         | 0         | 0         | Bacteria; Proteobacteria; Betaproteobacteria                                          |
| Otu3016 | 0        | 0       | 0       | 1       | 1       | 0       | 0         | 3         | 0         | 0         | 1         | 1         | Bacteria; OD1; ZB2                                                                    |
| Otu3015 | 5        | 5       | 4       | 5       | 9       | 2       | 1         | 1         | 4         | 7         | 5         | 3         | Bacteria; Verrucomicrobia; Pedosphaerae; Pedosphaerales                               |
| Otu3014 | 3        | 2       | 1       | 0       | 3       | 2       | 1         | 1         | 1         | 0         | 8         | 1         | Bacteria; Chloroflexi; Anaerolineae; Anaerolineales; Anaerolinaceae; Anaerolinea      |
| Otu3013 | 2        | 0       | 1       | 1       | 0       | 0       | 0         | 0         | 0         | 0         | 0         | 0         | Bacteria; Acidobacteria                                                               |
| Otu2610 | 0        | 0       | 0       | 3       | 0       | 0       | 0         | 1         | 0         | 0         | 0         | 0         | Bacteria; Planctomycetes; Planctomycetia; Gemmatales; Gemmataceae; Gemmata            |
| Otu2548 | 0        | 0       | 1       | 1       | 0       | 3       | 0         | 0         | 0         | 0         | 2         | 0         | Bacteria; Bacteroidetes; Sphingobacteriia; Sphingobacteriales                         |
| Otu2549 | 2        | 0       | 0       | 0       | 0       | 0       | 0         | 0         | 0         | 0         | 0         | 0         | Bacteria; Bacteroidetes; Saprospirae; Saprospirales; Chitinophagaceae                 |
| Otu2546 | 0        | 0       | 0       | 0       | 2       | 1       | 0         | 1         | 0         | 0         | 1         | 0         | Bacteria; Firmicutes; Clostridia; Clostridiales; Peptococcaceae; Pelotomaculum        |
| Otu2547 | 0        | 0       | 2       | 0       | 0       | 0       | 0         | 4         | 1         | 0         | 0         | 0         | Bacteria; Gemmatimonadetes; Gemmatimonadetes; KD8-87                                  |
| Otu2544 | 0        | 0       | 0       | 4       | 0       | 0       | 0         | 0         | 0         | 0         | 0         | 0         | Bacteria; Proteobacteria; Gammaproteobacteria; Legionellales; Coxiellaceae; Aquicella |
| Otu2545 | 0        | 2       | 4       | 2       | 0       | 2       | 6         | 4         | 3         | 0         | 1         | 0         | Bacteria; Actinobacteria; Actinobacteria; Actinomycetales; Actinosynnemataceae        |
| Otu2542 | 3        | 0       | 1       | 0       | 1       | 0       | 3         | 0         | 0         | 3         | 3         | 3         | Bacteria; Proteobacteria; Deltaproteobacteria; Myxococcales                           |
| Otu2543 | 0        | 0       | 1       | 1       | 0       | 0       | 0         | 0         | 2         | 0         | 0         | 1         | Bacteria; TM6; SBRH58                                                                 |

| #OTU ID | Z31DSO1r | Z31DSO2 | Z31DSO3 | Z31DSO4 | Z31DSO5 | Z31DSO6 | Z31JDSO1 | Z31JDSO2 | Z31JDSO3 | Z31JDSO4 | Z31JDSO5 | Z31JDSO6 | taxonomy                                                                                            |
|---------|----------|---------|---------|---------|---------|---------|----------|----------|----------|----------|----------|----------|-----------------------------------------------------------------------------------------------------|
| Otu2540 | 15       | 16      | 7       | 16      | 4       | 6       | 14       | 19       | 13       | 14       | 13       | 10       | Bacteria; Verrucomicrobia; Opitutae; Opitutales; Opitutaceae; Opitutus                              |
| Otu2541 | 3        | 0       | 4       | 2       | 1       | 4       | 3        | 2        | 1        | 1        | 5        | 0        | Bacteria; Planctomycetes; Planctomycetia; Gemmatales; Gemmataceae; Gemmata                          |
| Otu325  | 46       | 6       | 14      | 43      | 4       | 18      | 34       | 39       | 38       | 45       | 20       | 38       | Bacteria; Acidobacteria; Acidobacteriia; Acidobacteriales; Acidobacteriaceae                        |
| Otu3363 | 3        | 2       | 0       | 0       | 0       | 0       | 0        | 0        | 0        | 0        | 0        | 0        | Bacteria; Verrucomicrobia; Verrucomicrobiae; Verrucomicrobiales; Verrucomicrobiaceae; Luteolibacter |
| Otu324  | 1        | 3       | 0       | 2       | 0       | 38      | 6        | 0        | 0        | 0        | 38       | 1        | Bacteria; Cyanobacteria; Oscillatoriothycidae; Oscillatoriales; Phormidiaceae; Phormidium           |
| Otu1926 | 5        | 0       | 1       | 2       | 0       | 3       | 2        | 2        | 1        | 2        | 1        | 3        | Bacteria; Cyanobacteria; 4C0d-2; MLE1-12                                                            |
| Otu327  | 17       | 7       | 19      | 25      | 6       | 36      | 16       | 26       | 26       | 14       | 13       | 13       | Bacteria; Proteobacteria; Deltaproteobacteria; Myxococcales                                         |
| Otu1936 | 0        | 0       | 0       | 0       | 0       | 0       | 0        | 1        | 0        | 0        | 0        | 3        | Bacteria; Proteobacteria                                                                            |
| Otu1937 | 0        | 1       | 0       | 5       | 0       | 2       | 0        | 2        | 1        | 3        | 2        | 4        | Bacteria                                                                                            |
| Otu1934 | 0        | 3       | 0       | 0       | 0       | 0       | 0        | 0        | 0        | 0        | 0        | 0        | Bacteria; Chloroflexi; Anaerolineae; SBR1031; SJA-101                                               |
| Otu326  | 0        | 0       | 0       | 0       | 0       | 0       | 0        | 0        | 1        | 14       | 0        | 37       | Bacteria; Proteobacteria; Betaproteobacteria; Neisseriales; Neisseriaceae                           |
| Otu1932 | 0        | 3       | 0       | 2       | 0       | 0       | 1        | 1        | 0        | 1        | 1        | 2        | Bacteria; Bacteroidetes                                                                             |
| Otu1933 | 0        | 1       | 0       | 2       | 0       | 2       | 1        | 2        | 1        | 2        | 0        | 5        | Bacteria; Bacteroidetes; Saprospirae; Saprospirales; Chitinophagaceae                               |
| Otu1930 | 2        | 1       | 0       | 2       | 1       | 0       | 3        | 0        | 1        | 2        | 1        | 0        | Bacteria; Actinobacteria; Actinobacteria; Actinomycetales                                           |
| Otu1931 | 5        | 1       | 1       | 0       | 0       | 0       | 0        | 0        | 0        | 0        | 0        | 0        | Bacteria; Chlorobi; OPB56                                                                           |
| Otu321  | 19       | 11      | 24      | 55      | 11      | 42      | 50       | 65       | 50       | 40       | 37       | 49       | Bacteria; Gemmatimonadetes; Gemmatimonadetes                                                        |
| Otu1938 | 1        | 3       | 2       | 4       | 3       | 1       | 8        | 5        | 2        | 3        | 2        | 4        | Bacteria; Verrucomicrobia; Pedosphaerae; Pedosphaerales; auto67_4W                                  |
| Otu320  | 28       | 33      | 74      | 26      | 4       | 8       | 84       | 21       | 9        | 19       | 10       | 36       | Bacteria; Bacteroidetes; Sphingobacteriia; Sphingobacteriales; Sphingobacteriaceae                  |
| Otu3378 | 2        | 2       | 1       | 1       | 1       | 0       | 0        | 0        | 0        | 1        | 1        | 0        | Bacteria; Armatimonadetes; Chthonomonadetes; Chthonomonadales; Chthonomonadaceae                    |
| Otu3379 | 2        | 2       | 0       | 0       | 0       | 0       | 0        | 0        | 0        | 0        | 1        | 0        | Bacteria; Planctomycetes; Planctomycetia; Pirellulales; Pirellulaceae                               |
| Otu323  | 9        | 45      | 6       | 6       | 7       | 2       | 10       | 4        | 8        | 7        | 3        | 0        | Bacteria; Proteobacteria; Gammaproteobacteria; Legionellales; Coxiellaceae; Aquicella               |
| Otu3372 | 0        | 0       | 0       | 0       | 0       | 1       | 1        | 1        | 3        | 0        | 2        | 2        | Bacteria; Chloroflexi; Ktedonobacteria; Ktedonobacterales; Ktedonobacteraceae                       |

| #OTU ID | Z31DSO1r | Z31DSO2 | Z31DSO3 | Z31DSO4 | Z31DSO5 | Z31DSO6 | Z31JDSO1 | Z31JDSO2 | Z31JDSO3 | Z31JDSO4 | Z31JDSO5 | Z31JDSO6 | taxonomy                                                                                      |
|---------|----------|---------|---------|---------|---------|---------|----------|----------|----------|----------|----------|----------|-----------------------------------------------------------------------------------------------|
| Otu3373 | 0        | 0       | 2       | 1       | 1       | 0       | 1        | 0        | 0        | 0        | 0        | 0        | Bacteria; Actinobacteria; Actinobacteria; Actinomycetales; Actinospicaceae                    |
| Otu3370 | 0        | 0       | 0       | 1       | 0       | 0       | 2        | 1        | 0        | 1        | 1        | 0        | Bacteria; Firmicutes; Bacilli; Bacillales; Alicyclobacillaceae                                |
| Otu322  | 114      | 62      | 47      | 75      | 32      | 48      | 52       | 66       | 46       | 57       | 59       | 56       | Bacteria; Verrucomicrobia; Opitutae; Opitutaes; Opitutaceae; Opitutus                         |
| Otu3376 | 5        | 1       | 3       | 3       | 2       | 7       | 5        | 8        | 6        | 0        | 3        | 5        | Bacteria; Verrucomicrobia; Opitutae; Opitutaes; Opitutaceae; Opitutus                         |
| Otu3377 | 0        | 2       | 0       | 0       | 0       | 0       | 0        | 0        | 0        | 0        | 0        | 0        | Bacteria; Planctomycetes; Planctomycetia; Gemmatales; Gemmataceae                             |
| Otu3374 | 4        | 1       | 2       | 10      | 0       | 2       | 4        | 0        | 5        | 2        | 2        | 3        | Bacteria; Actinobacteria; Actinobacteria; Actinomycetales; Microbacteriaceae; Microbacterium  |
| Otu3375 | 2        | 0       | 1       | 0       | 3       | 1       | 0        | 0        | 0        | 1        | 3        | 1        | Bacteria; Proteobacteria; Alphaproteobacteria; Rhizobiales                                    |
| Otu3178 | 0        | 1       | 0       | 1       | 2       | 0       | 0        | 0        | 0        | 0        | 0        | 1        | Bacteria; OD1; ZB2                                                                            |
| Otu3169 | 2        | 0       | 0       | 0       | 0       | 0       | 0        | 0        | 0        | 0        | 0        | 0        | Bacteria; Proteobacteria; Gammaproteobacteria; Xanthomonadales; Xanthomonadaceae              |
| Otu859  | 13       | 4       | 5       | 12      | 2       | 11      | 10       | 5        | 8        | 6        | 8        | 9        | Bacteria; Planctomycetes; BD7-11                                                              |
| Otu858  | 11       | 3       | 1       | 1       | 1       | 2       | 0        | 1        | 3        | 3        | 3        | 1        | Bacteria; Armatimonadetes; Chthonomonadetes; Chthonomonadales; Chthonomonadaceae              |
| Otu856  | 3        | 3       | 2       | 3       | 2       | 5       | 4        | 1        | 3        | 2        | 9        | 0        | Bacteria                                                                                      |
| Otu855  | 4        | 3       | 5       | 5       | 0       | 0       | 6        | 12       | 6        | 9        | 2        | 5        | Bacteria                                                                                      |
| Otu854  | 16       | 3       | 6       | 1       | 5       | 2       | 1        | 0        | 0        | 4        | 8        | 1        | Bacteria; Planctomycetes; Phycisphaerae; WD2101                                               |
| Otu853  | 3        | 0       | 7       | 6       | 1       | 4       | 6        | 3        | 7        | 11       | 8        | 6        | Bacteria; Proteobacteria; Gammaproteobacteria; Legionellales; Coxiellaceae; Aquicella         |
| Otu852  | 5        | 6       | 3       | 3       | 12      | 2       | 3        | 2        | 3        | 3        | 3        | 0        | Bacteria; Chloroflexi; Anaerolineae; Anaerolineales; Anaerolinaceae; Anaerolinea              |
| Otu851  | 10       | 16      | 5       | 6       | 5       | 11      | 7        | 7        | 0        | 4        | 13       | 1        | Bacteria; Verrucomicrobia; Pedosphaerae; Pedosphaerales                                       |
| Otu850  | 20       | 13      | 18      | 24      | 15      | 10      | 16       | 12       | 13       | 7        | 16       | 6        | Bacteria; Acidobacteria; Solibacteres; Solibacterales; Solibacteraceae; Candidatus_Solibacter |
| Otu3167 | 0        | 1       | 0       | 1       | 0       | 2       | 0        | 0        | 0        | 1        | 0        | 1        | Bacteria; Planctomycetes; Planctomycetia; Gemmatales; Gemmataceae                             |
| Otu3166 | 4        | 0       | 0       | 1       | 0       | 0       | 0        | 0        | 0        | 0        | 1        | 0        | Bacteria; TM7; SC3                                                                            |
| Otu2859 | 0        | 1       | 2       | 2       | 0       | 1       | 3        | 2        | 4        | 1        | 4        | 0        | Bacteria; Bacteroidetes; Saprospirae; Saprospirales; Chitinophagaceae                         |
| Otu1622 | 7        | 8       | 0       | 1       | 0       | 0       | 6        | 0        | 0        | 0        | 3        | 0        | Bacteria; Gemmatimonadetes; Gemmatimonadetes; N1423WL                                         |

| #OTU ID | Z31DSO1r | Z31DSO2 | Z31DSO3 | Z31DSO4 | Z31DSO5 | Z31DSO6 | Z31JDSO1 | Z31JDSO2 | Z31JDSO3 | Z31JDSO4 | Z31JDSO5 | Z31JDSO6 | taxonomy                                                                                     |
|---------|----------|---------|---------|---------|---------|---------|----------|----------|----------|----------|----------|----------|----------------------------------------------------------------------------------------------|
| Otu1623 | 5        | 0       | 2       | 0       | 1       | 0       | 2        | 0        | 0        | 0        | 1        | 0        | Bacteria; Actinobacteria; Acidimicrobia; Acidimicrobiales; C111                              |
| Otu1620 | 0        | 0       | 0       | 4       | 1       | 0       | 0        | 0        | 0        | 2        | 1        | 0        | Bacteria; Proteobacteria; Gammaproteobacteria; Legionellales; Coxiellaceae; Aquicella        |
| Otu1621 | 0        | 0       | 0       | 0       | 2       | 0       | 0        | 1        | 1        | 1        | 4        | 3        | Bacteria; OD1; ZB2                                                                           |
| Otu1626 | 6        | 5       | 9       | 1       | 3       | 1       | 2        | 5        | 0        | 2        | 2        | 3        | Bacteria; Proteobacteria; Deltaproteobacteria; Myxococcales                                  |
| Otu1627 | 1        | 0       | 0       | 6       | 2       | 4       | 7        | 5        | 14       | 7        | 4        | 17       | Bacteria; OD1; SM2F11                                                                        |
| Otu1624 | 0        | 0       | 2       | 6       | 1       | 1       | 0        | 0        | 1        | 0        | 1        | 0        | Bacteria; Proteobacteria; Gammaproteobacteria; Legionellales                                 |
| Otu1625 | 20       | 14      | 13      | 12      | 8       | 11      | 2        | 5        | 13       | 12       | 17       | 6        | Bacteria; Proteobacteria; Betaproteobacteria; Rhodocyclales; Rhodocyclaceae                  |
| Otu2155 | 0        | 0       | 0       | 2       | 0       | 1       | 3        | 0        | 0        | 5        | 5        | 0        | Bacteria; Proteobacteria; Deltaproteobacteria; MIZ46                                         |
| Otu2154 | 6        | 2       | 0       | 0       | 2       | 2       | 0        | 0        | 0        | 1        | 4        | 1        | Bacteria; Actinobacteria; Rubrobacteria; Rubrobacterales; Rubrobacteraceae                   |
| Otu1628 | 3        | 0       | 1       | 2       | 1       | 0       | 0        | 0        | 1        | 1        | 4        | 2        | Bacteria; Acidobacteria; Acidobacteria; Acidobacteriales                                     |
| Otu1629 | 0        | 6       | 2       | 1       | 1       | 3       | 1        | 2        | 1        | 0        | 6        | 0        | Bacteria; Chloroflexi; Ktedonobacteria                                                       |
| Otu2151 | 1        | 0       | 0       | 0       | 1       | 0       | 0        | 0        | 0        | 7        | 0        | 2        | Bacteria; Elusimicrobia; Elusimicrobia; FAC88                                                |
| Otu2150 | 0        | 0       | 0       | 0       | 3       | 0       | 0        | 0        | 0        | 3        | 0        | 3        | Bacteria; Proteobacteria; Gammaproteobacteria; Legionellales                                 |
| Otu2153 | 0        | 2       | 2       | 0       | 0       | 0       | 2        | 5        | 6        | 3        | 0        | 2        | Bacteria; Proteobacteria; Alphaproteobacteria                                                |
| Otu2152 | 1        | 2       | 3       | 3       | 2       | 7       | 3        | 1        | 4        | 1        | 2        | 1        | Bacteria; Firmicutes; Bacilli; Bacillales; Alicyclobacillaceae; Alicyclobacillus             |
| Otu2498 | 1        | 1       | 3       | 0       | 1       | 2       | 3        | 0        | 1        | 3        | 2        | 1        | Bacteria; Proteobacteria; Deltaproteobacteria; Myxococcales; Haliangiaceae                   |
| Otu2455 | 2        | 0       | 0       | 2       | 0       | 0       | 0        | 0        | 0        | 0        | 2        | 2        | Bacteria; Proteobacteria; Alphaproteobacteria; Rhizobiales; Aurantimonadaceae                |
| Otu2499 | 0        | 0       | 2       | 2       | 0       | 1       | 0        | 0        | 1        | 0        | 0        | 0        | Bacteria; Proteobacteria; Gammaproteobacteria; Legionellales; Coxiellaceae; Aquicella        |
| Otu3371 | 0        | 0       | 0       | 1       | 0       | 0       | 0        | 0        | 0        | 0        | 2        | 0        | Bacteria                                                                                     |
| Otu2029 | 57       | 17      | 27      | 29      | 13      | 23      | 30       | 14       | 20       | 21       | 34       | 16       | Bacteria; Proteobacteria; Alphaproteobacteria; Rhizobiales; Hyphomicrobiaceae; Rhodoplanes   |
| Otu2028 | 7        | 3       | 4       | 7       | 3       | 10      | 5        | 3        | 7        | 8        | 6        | 5        | Bacteria; Armatimonadetes; Fimbriimonadia; Fimbriimonadales; Fimbriimonadaceae; Fimbriimonas |
| Otu1718 | 0        | 3       | 1       | 0       | 2       | 0       | 0        | 0        | 0        | 0        | 1        | 0        | Bacteria                                                                                     |

| #OTU ID | Z31DSO1r | Z31DSO2 | Z31DSO3 | Z31DSO4 | Z31DSO5 | Z31DSO6 | Z31JDSO1 | Z31JDSO2 | Z31JDSO3 | Z31JDSO4 | Z31JDSO5 | Z31JDSO6 | taxonomy                                                                                                             |
|---------|----------|---------|---------|---------|---------|---------|----------|----------|----------|----------|----------|----------|----------------------------------------------------------------------------------------------------------------------|
| Otu1719 | 11       | 9       | 7       | 12      | 11      | 5       | 20       | 5        | 11       | 15       | 20       | 4        | Bacteria; Proteobacteria; Alphaproteobacteria; Rhodospirillales; Rhodospirillaceae                                   |
| Otu1716 | 4        | 0       | 0       | 0       | 0       | 0       | 0        | 0        | 0        | 0        | 0        | 0        | Bacteria; Acidobacteria; Chloracidobacteria; RB41                                                                    |
| Otu1717 | 1        | 1       | 0       | 1       | 0       | 0       | 4        | 1        | 1        | 2        | 1        | 0        | Bacteria; Firmicutes; Bacilli; Bacillales; Bacillaceae; Terribacillus                                                |
| Otu1714 | 1        | 0       | 0       | 0       | 1       | 0       | 1        | 0        | 1        | 0        | 3        | 0        | Bacteria; Tenericutes; Mollicutes; Anaeroplasmatales; Anaeroplasmataceae; Asteroleplasma                             |
| Otu1715 | 5        | 1       | 5       | 3       | 4       | 2       | 1        | 0        | 0        | 1        | 6        | 0        | Bacteria; Planctomycetes; Planctomycetia; B97                                                                        |
| Otu1712 | 1        | 3       | 2       | 4       | 0       | 1       | 5        | 1        | 0        | 2        | 2        | 2        | Bacteria; Firmicutes; Clostridia; OPB54                                                                              |
| Otu1713 | 0        | 0       | 0       | 0       | 0       | 0       | 3        | 2        | 0        | 3        | 0        | 1        | Bacteria                                                                                                             |
| Otu1710 | 0        | 0       | 0       | 0       | 0       | 0       | 0        | 1        | 0        | 0        | 0        | 4        | Bacteria; Proteobacteria; Deltaproteobacteria                                                                        |
| Otu1711 | 0        | 0       | 1       | 2       | 4       | 0       | 2        | 0        | 2        | 1        | 0        | 0        | Bacteria                                                                                                             |
| Otu3394 | 0        | 0       | 1       | 1       | 0       | 0       | 2        | 0        | 2        | 1        | 1        | 1        | Bacteria; TM6; SJA-4                                                                                                 |
| Otu3395 | 1        | 0       | 2       | 0       | 0       | 0       | 1        | 2        | 0        | 0        | 0        | 0        | Bacteria; Planctomycetes; Planctomycetia; Gemmatales; Gemmataceae; Gemmata                                           |
| Otu3396 | 0        | 2       | 0       | 0       | 0       | 0       | 0        | 0        | 0        | 0        | 0        | 0        | Bacteria; Verrucomicrobia; Pedosphaerae; Pedosphaerales                                                              |
| Otu3397 | 5        | 4       | 1       | 1       | 1       | 0       | 3        | 0        | 1        | 1        | 4        | 0        | Bacteria; Proteobacteria; Alphaproteobacteria; Rhodospirillales; Rhodospirillaceae                                   |
| Otu3390 | 0        | 0       | 0       | 1       | 0       | 0       | 0        | 1        | 0        | 2        | 0        | 0        | Bacteria; Proteobacteria; Deltaproteobacteria; Syntrophobacteriales; Syntrophobacteraceae                            |
| Otu3391 | 0        | 0       | 0       | 0       | 0       | 0       | 0        | 0        | 0        | 0        | 2        | 0        | Bacteria                                                                                                             |
| Otu3392 | 2        | 0       | 0       | 0       | 0       | 0       | 0        | 0        | 0        | 0        | 1        | 0        | Bacteria; Actinobacteria; MB-A2-108; 0319-7L14                                                                       |
| Otu3393 | 1        | 0       | 0       | 0       | 1       | 0       | 1        | 0        | 0        | 0        | 2        | 0        | Bacteria; Tenericutes; Mollicutes; Anaeroplasmatales; Anaeroplasmataceae; Asteroleplasma                             |
| Otu3398 | 0        | 0       | 0       | 0       | 0       | 0       | 0        | 2        | 0        | 0        | 0        | 0        | Bacteria                                                                                                             |
| Otu3399 | 0        | 0       | 0       | 0       | 0       | 3       | 0        | 0        | 0        | 0        | 0        | 2        | Bacteria; Proteobacteria; Alphaproteobacteria; Rhodospirillales; Rhodospirillaceae                                   |
| Otu1433 | 5        | 4       | 4       | 2       | 2       | 1       | 0        | 1        | 1        | 6        | 1        | 2        | Bacteria; Nitrospirae; Nitrospira; Nitrospirales; Nitrospiraceae                                                     |
| Otu1432 | 2        | 2       | 6       | 0       | 0       | 3       | 5        | 0        | 0        | 1        | 5        | 2        | Bacteria; Proteobacteria; Alphaproteobacteria; Rickettsiales; mitochondria; Acanthamoeba; Acanthamoeba_palestinensis |
| Otu1431 | 0        | 0       | 1       | 2       | 0       | 0       | 4        | 0        | 1        | 0        | 1        | 0        | Bacteria                                                                                                             |

| #OTU ID | Z31DSO1r | Z31DSO2 | Z31DSO3 | Z31DSO4 | Z31DSO5 | Z31DSO6 | Z31JDSO1 | Z31JDSO2 | Z31JDSO3 | Z31JDSO4 | Z31JDSO5 | Z31JDSO6 | taxonomy                                                                                           |
|---------|----------|---------|---------|---------|---------|---------|----------|----------|----------|----------|----------|----------|----------------------------------------------------------------------------------------------------|
| Otu1430 | 4        | 2       | 2       | 0       | 0       | 0       | 0        | 0        | 0        | 1        | 2        | 0        | Bacteria; Proteobacteria; Deltaproteobacteria; Bdellovibrionales; Bdellovibrionaceae; Bdellovibrio |
| Otu1437 | 12       | 3       | 2       | 9       | 4       | 0       | 8        | 11       | 8        | 3        | 1        | 2        | Bacteria; Elusimicrobia; Elusimicrobia; FAC88                                                      |
| Otu1436 | 5        | 0       | 5       | 3       | 1       | 1       | 1        | 0        | 0        | 2        | 7        | 2        | Bacteria; Actinobacteria; MB-A2-108; 0319-7L14                                                     |
| Otu1435 | 4        | 0       | 3       | 0       | 2       | 2       | 3        | 3        | 3        | 1        | 6        | 1        | Bacteria; Proteobacteria; Alphaproteobacteria; Rhodospirillales; Rhodospirillaceae                 |
| Otu1434 | 0        | 1       | 1       | 3       | 1       | 3       | 5        | 0        | 2        | 2        | 4        | 0        | Bacteria; Armatimonadetes; Fimbriimonadia; Fimbriimonadales; Fimbriimonadaceae; Fimbriimonas       |
| Otu1439 | 8        | 5       | 1       | 3       | 4       | 0       | 2        | 0        | 0        | 1        | 6        | 0        | Bacteria; Gemmatimonadetes; Gemmatimonadetes                                                       |
| Otu1438 | 1        | 0       | 0       | 3       | 2       | 6       | 0        | 1        | 4        | 2        | 5        | 1        | Bacteria; Proteobacteria; Deltaproteobacteria                                                      |
| Otu1121 | 7        | 6       | 4       | 2       | 2       | 3       | 8        | 4        | 5        | 1        | 10       | 3        | Bacteria; Actinobacteria; Thermoleophilia; Solirubrobacterales                                     |
| Otu1120 | 6        | 1       | 2       | 1       | 0       | 0       | 0        | 0        | 1        | 1        | 0        | 0        | Bacteria; Proteobacteria; Alphaproteobacteria                                                      |
| Otu2849 | 10       | 6       | 11      | 11      | 4       | 12      | 11       | 15       | 14       | 11       | 11       | 20       | Bacteria; Acidobacteria; Acidobacteriia; Acidobacteriales; Koribacteraceae                         |
| Otu2848 | 0        | 0       | 0       | 2       | 0       | 0       | 1        | 0        | 0        | 0        | 0        | 0        | Bacteria; Firmicutes; Bacilli; Bacillales; Paenibacillaceae; Paenibacillus                         |
| Otu3407 | 0        | 1       | 0       | 0       | 0       | 0       | 2        | 0        | 0        | 0        | 0        | 0        | Bacteria; Planctomycetes; Planctomycetia; Gemmatales; Gemmataceae                                  |
| Otu2843 | 2        | 0       | 0       | 1       | 1       | 0       | 1        | 0        | 0        | 0        | 1        | 2        | Bacteria; OP11; OP11-3                                                                             |
| Otu2842 | 6        | 4       | 14      | 12      | 11      | 5       | 29       | 6        | 27       | 13       | 16       | 11       | Bacteria; Acidobacteria; Solibacteres; Solibacterales; Solibacteraceae; Candidatus_Solibacter      |
| Otu2841 | 2        | 1       | 0       | 0       | 0       | 0       | 0        | 0        | 0        | 0        | 0        | 0        | Bacteria; Chloroflexi; Thermomicrobia; JG30-KF-CM45                                                |
| Otu2847 | 3        | 1       | 3       | 4       | 0       | 1       | 4        | 5        | 7        | 4        | 7        | 4        | Bacteria; Proteobacteria; Gammaproteobacteria; Xanthomonadales; Xanthomonadaceae                   |
| Otu2846 | 2        | 0       | 1       | 1       | 0       | 2       | 2        | 0        | 1        | 2        | 3        | 1        | Bacteria; Proteobacteria; Deltaproteobacteria; MIZ46                                               |
| Otu2845 | 2        | 0       | 0       | 0       | 0       | 0       | 0        | 0        | 0        | 0        | 0        | 0        | Bacteria; Proteobacteria; Betaproteobacteria                                                       |
| Otu2844 | 0        | 0       | 0       | 1       | 0       | 0       | 2        | 1        | 3        | 1        | 0        | 0        | Bacteria; Bacteroidetes; Sphingobacteriia; Sphingobacteriales; Sphingobacteriaceae                 |
| Otu400  | 25       | 10      | 15      | 35      | 11      | 13      | 12       | 2        | 11       | 13       | 22       | 8        | Bacteria; Planctomycetes; Phycisphaerae; WD2101                                                    |
| Otu1389 | 6        | 1       | 1       | 0       | 0       | 1       | 2        | 0        | 0        | 2        | 1        | 0        | Bacteria; Nitrospirae; Nitrospira; Nitrospirales; 0319-6A21                                        |
| Otu1388 | 2        | 5       | 4       | 6       | 0       | 6       | 6        | 4        | 10       | 0        | 8        | 2        | Bacteria; Acidobacteria; Acidobacteria-6; iii1-15                                                  |



| #OTU ID | Z31DSO1r | Z31DSO2 | Z31DSO3 | Z31DSO4 | Z31DSO5 | Z31DSO6 | Z31JDSO1 | Z31JDSO2 | Z31JDSO3 | Z31JDSO4 | Z31JDSO5 | Z31JDSO6 | taxonomy                                                                                                    |
|---------|----------|---------|---------|---------|---------|---------|----------|----------|----------|----------|----------|----------|-------------------------------------------------------------------------------------------------------------|
| Otu401  | 16       | 1       | 2       | 9       | 3       | 32      | 1        | 0        | 3        | 3        | 33       | 0        | Bacteria; Cyanobacteria; Oscillatoriothricaceae; Oscillatoriales; Phormidiaceae; Phormidium                 |
| Otu1385 | 0        | 1       | 3       | 1       | 0       | 1       | 0        | 6        | 4        | 2        | 1        | 0        | Bacteria; Proteobacteria; Gammaproteobacteria; Legionellales                                                |
| Otu1384 | 0        | 2       | 1       | 1       | 1       | 3       | 3        | 2        | 0        | 3        | 8        | 1        | Bacteria; Proteobacteria; Deltaproteobacteria; Entotheonellales; Entotheonellaceae                          |
| Otu1387 | 6        | 9       | 6       | 0       | 9       | 3       | 10       | 1        | 1        | 0        | 8        | 1        | Bacteria; Actinobacteria; Actinobacteria; Actinomycetales; Kineosporiaceae                                  |
| Otu1386 | 9        | 4       | 2       | 5       | 2       | 7       | 8        | 7        | 7        | 4        | 4        | 5        | Bacteria; Proteobacteria; Alphaproteobacteria; Rhodospirillales; Acetobacteraceae                           |
| Otu1381 | 4        | 2       | 6       | 5       | 0       | 2       | 11       | 1        | 1        | 4        | 2        | 2        | Bacteria; Chloroflexi; TK10; B07_WMSP1                                                                      |
| Otu1380 | 53       | 57      | 44      | 24      | 42      | 17      | 23       | 9        | 23       | 33       | 43       | 14       | Bacteria; Acidobacteria; Chloracidobacteria; 11-24                                                          |
| Otu1383 | 8        | 2       | 4       | 3       | 0       | 0       | 3        | 2        | 2        | 1        | 3        | 2        | Bacteria; Verrucomicrobia; Pedosphaerae; Pedosphaerales; Ellin517                                           |
| Otu1382 | 0        | 0       | 1       | 5       | 0       | 0       | 0        | 0        | 0        | 0        | 1        | 0        | Bacteria; Bacteroidetes; Cytophagia; Cytophagales; Cytophagaceae; Siphonobacter; Siphonobacter_aquaclararum |
| Otu2160 | 0        | 0       | 0       | 0       | 1       | 0       | 1        | 0        | 0        | 0        | 3        | 0        | Bacteria; Actinobacteria; Actinobacteria; Actinomycetales                                                   |
| Otu1549 | 0        | 0       | 3       | 1       | 2       | 2       | 0        | 6        | 4        | 1        | 0        | 0        | Bacteria; WPS-2                                                                                             |
| Otu1548 | 4        | 0       | 0       | 0       | 0       | 0       | 0        | 0        | 0        | 0        | 0        | 0        | Bacteria; Bacteroidetes; Saprospirae; Saprospirales; Chitinophagaceae                                       |
| Otu1547 | 6        | 2       | 7       | 15      | 1       | 9       | 7        | 10       | 13       | 10       | 10       | 2        | Bacteria; Acidobacteria; Solibacteres; Solibacterales; Solibacteraceae; Candidatus_Solibacter               |
| Otu1546 | 0        | 6       | 10      | 1       | 1       | 1       | 2        | 0        | 0        | 4        | 5        | 0        | Bacteria; Actinobacteria; Actinobacteria; Actinomycetales; Micromonosporaceae; Actinoplanes                 |
| Otu1545 | 6        | 0       | 1       | 1       | 3       | 2       | 3        | 1        | 0        | 1        | 3        | 0        | Bacteria; Planctomycetes; Planctomycetia; Gemmatales; Gemmataceae                                           |
| Otu1544 | 0        | 0       | 0       | 1       | 1       | 1       | 4        | 1        | 1        | 2        | 2        | 0        | Bacteria; Proteobacteria; Gammaproteobacteria; Legionellales; Coxiellaceae                                  |
| Otu1543 | 0        | 0       | 3       | 1       | 1       | 2       | 1        | 0        | 1        | 1        | 4        | 1        | Bacteria                                                                                                    |
| Otu1542 | 0        | 1       | 1       | 0       | 6       | 1       | 2        | 4        | 3        | 6        | 3        | 2        | Bacteria; Proteobacteria; Gammaproteobacteria; Legionellales; Coxiellaceae                                  |
| Otu1541 | 3        | 4       | 6       | 6       | 4       | 4       | 5        | 2        | 3        | 9        | 9        | 1        | Bacteria; Planctomycetes; Planctomycetia; Gemmatales; Gemmataceae; Gemmata                                  |
| Otu1540 | 1        | 1       | 2       | 1       | 0       | 1       | 1        | 1        | 2        | 1        | 8        | 2        | Bacteria; Firmicutes; Bacilli; Bacillales; Alicyclobacillaceae; Alicyclobacillus                            |
| Otu1554 | 6        | 4       | 1       | 4       | 2       | 0       | 1        | 3        | 2        | 3        | 3        | 0        | Bacteria; TM7; SC3                                                                                          |
| Otu2163 | 0        | 0       | 0       | 0       | 0       | 0       | 0        | 0        | 0        | 0        | 3        | 0        | Bacteria; Proteobacteria; Alphaproteobacteria                                                               |

| #OTU ID | Z31DSO1r | Z31DSO2 | Z31DSO3 | Z31DSO4 | Z31DSO5 | Z31DSO6 | Z31J1DSO1 | Z31J1DSO2 | Z31J1DSO3 | Z31J1DSO4 | Z31J1DSO5 | Z31J1DSO6 | taxonomy                                                                             |
|---------|----------|---------|---------|---------|---------|---------|-----------|-----------|-----------|-----------|-----------|-----------|--------------------------------------------------------------------------------------|
| Otu1555 | 4        | 0       | 0       | 1       | 1       | 0       | 0         | 1         | 5         | 0         | 0         | 0         | Bacteria; Armatimonadetes; OPB50                                                     |
| Otu2164 | 0        | 0       | 0       | 0       | 0       | 0       | 0         | 0         | 0         | 1         | 2         | 5         | Bacteria; Proteobacteria; Gammaproteobacteria; Xanthomonadales; Sinobacteraceae      |
| Otu2738 | 2        | 0       | 0       | 0       | 0       | 0       | 0         | 0         | 0         | 0         | 0         | 0         | Bacteria                                                                             |
| Otu1556 | 16       | 0       | 6       | 6       | 2       | 1       | 12        | 0         | 1         | 3         | 8         | 2         | Bacteria; Proteobacteria; Betaproteobacteria                                         |
| Otu2165 | 1        | 2       | 4       | 2       | 2       | 2       | 7         | 1         | 4         | 3         | 4         | 1         | Bacteria; Planctomycetes; Planctomycetia; Gemmatales; Gemmataceae                    |
| Otu149  | 20       | 20      | 7       | 28      | 11      | 7       | 20        | 18        | 15        | 85        | 26        | 29        | Bacteria; Verrucomicrobia; Pedosphaerae; Pedosphaerales                              |
| Otu1557 | 0        | 0       | 0       | 0       | 0       | 0       | 0         | 0         | 1         | 0         | 6         | 0         | Bacteria; Cyanobacteria; Synechococcophycideae; Pseudanabaenales                     |
| Otu2166 | 3        | 2       | 2       | 0       | 0       | 0       | 3         | 0         | 0         | 0         | 0         | 0         | Bacteria; Chloroflexi; Chloroflexi; Roseiflexales; Kouleothrixaceae                  |
| Otu148  | 113      | 59      | 50      | 88      | 37      | 44      | 85        | 66        | 48        | 117       | 100       | 38        | Bacteria; Planctomycetes; Phycisphaerae; WD2101                                      |
| Otu1550 | 0        | 8       | 0       | 0       | 0       | 1       | 0         | 0         | 0         | 3         | 1         | 1         | Bacteria; Chloroflexi; Anaerolineae; SBR1031; A4b                                    |
| Otu1632 | 0        | 2       | 1       | 5       | 2       | 2       | 1         | 2         | 1         | 0         | 1         | 2         | Bacteria; Planctomycetes; Planctomycetia; Gemmatales; Gemmataceae; Gemmata           |
| Otu1498 | 0        | 1       | 3       | 4       | 1       | 2       | 4         | 2         | 0         | 1         | 8         | 2         | Bacteria; Cyanobacteria; Chloroplast; Chlorophyta                                    |
| Otu1552 | 5        | 4       | 6       | 3       | 3       | 4       | 9         | 0         | 3         | 4         | 5         | 2         | Bacteria; Actinobacteria; Actinobacteria; Actinomycetales; Frankiaceae               |
| Otu888  | 8        | 13      | 13      | 20      | 14      | 15      | 19        | 8         | 13        | 7         | 21        | 8         | Bacteria; Actinobacteria; Thermoleophilia; Solirubrobacterales                       |
| Otu1553 | 1        | 0       | 2       | 0       | 0       | 1       | 2         | 4         | 2         | 0         | 0         | 2         | Bacteria; Armatimonadetes; 0319-6E2                                                  |
| Otu889  | 2        | 8       | 2       | 0       | 2       | 0       | 4         | 0         | 0         | 1         | 7         | 2         | Bacteria; Proteobacteria; Deltaproteobacteria; Entotheonellales; Entotheonellaceae   |
| Otu1099 | 0        | 1       | 0       | 0       | 0       | 0       | 0         | 6         | 0         | 0         | 0         | 0         | Bacteria; Proteobacteria; Alphaproteobacteria                                        |
| Otu1098 | 3        | 12      | 5       | 2       | 3       | 0       | 3         | 1         | 0         | 3         | 1         | 0         | Bacteria; Gemmatimonadetes; Gemmatimonadetes; N1423WL                                |
| Otu1091 | 10       | 5       | 10      | 12      | 6       | 17      | 14        | 12        | 20        | 5         | 7         | 5         | Bacteria; Planctomycetes; Planctomycetia; Pirellulales; Pirellulaceae                |
| Otu1090 | 12       | 1       | 3       | 2       | 0       | 1       | 1         | 1         | 1         | 5         | 3         | 1         | Bacteria; Armatimonadetes; 0319-6E2                                                  |
| Otu1093 | 0        | 2       | 2       | 7       | 0       | 0       | 0         | 1         | 0         | 3         | 1         | 0         | Bacteria; Verrucomicrobia; Verrucomicrobiae; Verrucomicrobiales; Verrucomicrobiaceae |
| Otu1092 | 0        | 0       | 3       | 2       | 0       | 8       | 6         | 2         | 2         | 7         | 0         | 4         | Bacteria; Chloroflexi; Ktedonobacteria; JG30-KF-AS9                                  |

| #OTU ID | Z31DSO1r | Z31DSO2 | Z31DSO3 | Z31DSO4 | Z31DSO5 | Z31DSO6 | Z31JDSO1 | Z31JDSO2 | Z31JDSO3 | Z31JDSO4 | Z31JDSO5 | Z31JDSO6 | taxonomy                                                                                                               |
|---------|----------|---------|---------|---------|---------|---------|----------|----------|----------|----------|----------|----------|------------------------------------------------------------------------------------------------------------------------|
| Otu1095 | 6        | 2       | 2       | 2       | 1       | 2       | 7        | 2        | 1        | 2        | 2        | 1        | Bacteria; Proteobacteria; Alphaproteobacteria; Rhodospirillales; Rhodospirillaceae                                     |
| Otu1094 | 5        | 4       | 3       | 0       | 2       | 2       | 2        | 4        | 2        | 5        | 2        | 9        | Bacteria; Proteobacteria; Alphaproteobacteria; Rhodospirillales; Acetobacteraceae                                      |
| Otu1097 | 1        | 0       | 4       | 6       | 1       | 3       | 5        | 4        | 3        | 7        | 2        | 1        | Bacteria; Proteobacteria; Gammaproteobacteria; Legionellales                                                           |
| Otu1096 | 1        | 4       | 4       | 12      | 1       | 2       | 3        | 3        | 13       | 5        | 4        | 1        | Bacteria; Proteobacteria; Deltaproteobacteria; Spirobacillales                                                         |
| Otu668  | 36       | 8       | 20      | 30      | 14      | 26      | 25       | 18       | 24       | 42       | 28       | 10       | Bacteria; Armatimonadetes; Chthonomonadetes; Chthonomonadales; Chthonomonadaceae                                       |
| Otu669  | 13       | 6       | 17      | 7       | 4       | 4       | 13       | 7        | 10       | 6        | 15       | 7        | Bacteria; Proteobacteria                                                                                               |
| Otu2713 | 0        | 0       | 1       | 0       | 0       | 0       | 3        | 0        | 0        | 0        | 0        | 1        | Bacteria; Proteobacteria; Alphaproteobacteria; Rhizobiales; Bradyrhizobiaceae                                          |
| Otu2712 | 10       | 18      | 27      | 22      | 19      | 29      | 48       | 36       | 31       | 19       | 36       | 20       | Bacteria; Actinobacteria; Actinobacteria; Actinomycetales                                                              |
| Otu598  | 18       | 6       | 5       | 22      | 8       | 15      | 20       | 19       | 17       | 13       | 16       | 23       | Bacteria; Proteobacteria; Deltaproteobacteria; Myxococcales; Haliangiaceae                                             |
| Otu599  | 0        | 0       | 20      | 0       | 4       | 0       | 0        | 0        | 1        | 3        | 0        | 0        | Bacteria; Bacteroidetes                                                                                                |
| Otu2717 | 6        | 0       | 0       | 2       | 2       | 1       | 0        | 1        | 1        | 1        | 2        | 3        | Bacteria; Elusimicrobia; Elusimicrobia; FAC88                                                                          |
| Otu2716 | 0        | 0       | 0       | 0       | 0       | 0       | 0        | 0        | 0        | 0        | 2        | 0        | Bacteria                                                                                                               |
| Otu2715 | 2        | 3       | 0       | 1       | 1       | 0       | 2        | 0        | 1        | 2        | 2        | 2        | Bacteria; Proteobacteria; Alphaproteobacteria                                                                          |
| Otu2714 | 2        | 0       | 0       | 3       | 3       | 1       | 3        | 0        | 2        | 1        | 2        | 2        | Bacteria; TM7; TM7-1                                                                                                   |
| Otu592  | 15       | 7       | 11      | 15      | 3       | 10      | 18       | 12       | 10       | 5        | 18       | 5        | Bacteria; Acidobacteria; Acidobacteria-6; iii1-15                                                                      |
| Otu593  | 11       | 13      | 1       | 3       | 2       | 2       | 1        | 1        | 9        | 21       | 3        | 1        | Bacteria; Verrucomicrobia; Verrucomicrobiae; Verrucomicrobiales; Verrucomicrobiaceae                                   |
| Otu590  | 22       | 9       | 0       | 1       | 4       | 3       | 4        | 5        | 5        | 2        | 2        | 4        | Bacteria; Proteobacteria; Betaproteobacteria                                                                           |
| Otu591  | 0        | 0       | 0       | 0       | 0       | 0       | 0        | 0        | 1        | 14       | 0        | 0        | Bacteria; Chlamydiae; Chlamydia; Chlamydiales; Rhabdochlamydiae; Candidatus_Rhabdochlamydia                            |
| Otu596  | 0        | 4       | 0       | 19      | 2       | 0       | 9        | 0        | 0        | 1        | 2        | 3        | Bacteria; Bacteroidetes; Cytophagia; Cytophagales; Cytophagaceae; Cytophaga                                            |
| Otu597  | 26       | 5       | 2       | 2       | 6       | 9       | 2        | 1        | 2        | 2        | 8        | 2        | Bacteria; Proteobacteria; Gammaproteobacteria; Xanthomonadales; Sinobacteraceae                                        |
| Otu594  | 7        | 2       | 2       | 16      | 1       | 1       | 0        | 0        | 0        | 12       | 3        | 2        | Bacteria; Bacteroidetes; Flavobacteriia; Flavobacteriales; Flavobacteriaceae; Flavobacterium; Flavobacterium_columnare |
| Otu144  | 146      | 98      | 101     | 201     | 85      | 207     | 83       | 125      | 182      | 117      | 191      | 134      | Bacteria; Verrucomicrobia; Pedosphaerae; Pedosphaerales; Elin515                                                       |

| #OTU ID | Z31DSO1r | Z31DSO2 | Z31DSO3 | Z31DSO4 | Z31DSO5 | Z31DSO6 | Z31JDSO1 | Z31JDSO2 | Z31JDSO3 | Z31JDSO4 | Z31JDSO5 | Z31JDSO6 | taxonomy                                                                                          |
|---------|----------|---------|---------|---------|---------|---------|----------|----------|----------|----------|----------|----------|---------------------------------------------------------------------------------------------------|
| Otu147  | 49       | 18      | 35      | 88      | 23      | 93      | 66       | 85       | 84       | 70       | 41       | 70       | Bacteria; Acidobacteria; Solibacteres; Solibacterales                                             |
| Otu146  | 135      | 82      | 47      | 79      | 38      | 33      | 53       | 7        | 18       | 179      | 104      | 25       | Bacteria; Bacteroidetes; Flavobacteriia; Flavobacteriales; Flavobacteriaceae; Flavobacterium      |
| Otu1165 | 48       | 25      | 40      | 33      | 13      | 13      | 25       | 15       | 20       | 50       | 21       | 34       | Bacteria; Proteobacteria; Alphaproteobacteria; Sphingomonadales; Sphingomonadaceae                |
| Otu1164 | 1        | 2       | 0       | 1       | 0       | 1       | 7        | 0        | 0        | 1        | 1        | 2        | Bacteria; Planctomycetes; Planctomycetia; Gemmatales; Gemmataceae                                 |
| Otu1167 | 11       | 1       | 1       | 6       | 1       | 3       | 2        | 1        | 1        | 4        | 4        | 4        | Bacteria; Planctomycetes; Phycisphaerae; CPIa-3                                                   |
| Otu1166 | 0        | 0       | 0       | 1       | 0       | 0       | 0        | 0        | 0        | 0        | 11       | 0        | Bacteria; Bacteroidetes; Cytophagia; Cytophagales; Cytophagaceae; Larkinella                      |
| Otu1161 | 40       | 28      | 5       | 9       | 2       | 1       | 3        | 5        | 0        | 9        | 6        | 0        | Bacteria; Bacteroidetes; Cytophagia; Cytophagales; Cytophagaceae                                  |
| Otu1160 | 3        | 1       | 0       | 8       | 4       | 4       | 2        | 1        | 1        | 5        | 10       | 1        | Bacteria; Cyanobacteria; Synechococcophycideae; Pseudanabaenales; Pseudanabaenaceae; Leptolyngbya |
| Otu1163 | 10       | 0       | 2       | 5       | 2       | 3       | 3        | 3        | 5        | 7        | 3        | 2        | Bacteria; Elusimicrobia; Elusimicrobia; FAC88                                                     |
| Otu1162 | 0        | 0       | 3       | 7       | 1       | 10      | 4        | 0        | 0        | 1        | 0        | 0        | Bacteria; Cyanobacteria; 4C0d-2; SM1D11                                                           |
| Otu444  | 28       | 3       | 1       | 2       | 1       | 3       | 8        | 12       | 12       | 9        | 3        | 9        | Bacteria; Chlamydiae; Chlamydia; Chlamydiales; Rhabdochlamydiaceae; Candidatus_Rhabdochlamydia    |
| Otu445  | 16       | 27      | 18      | 27      | 31      | 49      | 24       | 19       | 23       | 19       | 25       | 14       | Bacteria; Chloroflexi; Anaerolineae; SBR1031; oc28                                                |
| Otu446  | 17       | 5       | 21      | 38      | 6       | 39      | 12       | 43       | 42       | 24       | 15       | 24       | Bacteria; Planctomycetes; Phycisphaerae; WD2101                                                   |
| Otu447  | 43       | 9       | 9       | 12      | 14      | 15      | 23       | 11       | 7        | 22       | 25       | 27       | Bacteria; Planctomycetes; Phycisphaerae; WD2101                                                   |
| Otu1169 | 6        | 4       | 4       | 7       | 5       | 3       | 8        | 3        | 9        | 7        | 7        | 4        | Bacteria; Gemmatimonadetes; Gemmatimonadetes                                                      |
| Otu1168 | 2        | 2       | 9       | 4       | 1       | 1       | 14       | 3        | 5        | 2        | 9        | 3        | Bacteria; Verrucomicrobia; Spartobacteria; Chthoniobacterales; Chthoniobacteraceae                |
| Otu442  | 27       | 16      | 19      | 18      | 14      | 10      | 15       | 9        | 18       | 33       | 10       | 9        | Bacteria; Proteobacteria; Deltaproteobacteria; Myxococcales                                       |
| Otu443  | 13       | 5       | 2       | 29      | 9       | 6       | 15       | 20       | 28       | 19       | 13       | 15       | Bacteria; Chlorobi                                                                                |
| Otu1367 | 0        | 1       | 0       | 0       | 1       | 0       | 0        | 0        | 5        | 0        | 0        | 2        | Bacteria; Cyanobacteria; 4C0d-2; MLE1-12                                                          |
| Otu1366 | 1        | 0       | 0       | 5       | 2       | 2       | 1        | 1        | 2        | 0        | 4        | 1        | Bacteria; Cyanobacteria                                                                           |
| Otu1365 | 1        | 2       | 1       | 0       | 0       | 2       | 1        | 0        | 1        | 1        | 1        | 6        | Bacteria; Proteobacteria; Deltaproteobacteria; Myxococcales                                       |
| Otu1364 | 4        | 4       | 3       | 6       | 3       | 13      | 8        | 7        | 9        | 3        | 4        | 3        | Bacteria; Planctomycetes; Planctomycetia; Planctomycetales; Planctomycetaceae; Planctomyces       |

| #OTU ID | Z31DSO1r | Z31DSO2 | Z31DSO3 | Z31DSO4 | Z31DSO5 | Z31DSO6 | Z31J1DSO1 | Z31J1DSO2 | Z31J1DSO3 | Z31J1DSO4 | Z31J1DSO5 | Z31J1DSO6 | taxonomy                                                                                                                       |
|---------|----------|---------|---------|---------|---------|---------|-----------|-----------|-----------|-----------|-----------|-----------|--------------------------------------------------------------------------------------------------------------------------------|
| Otu1363 | 3        | 5       | 4       | 2       | 2       | 3       | 4         | 9         | 3         | 4         | 6         | 2         | Bacteria; Planctomycetes; Planctomycetia; Gemmatales; Isosphaeraceae                                                           |
| Otu1362 | 9        | 3       | 0       | 2       | 2       | 2       | 1         | 0         | 2         | 1         | 3         | 0         | Bacteria                                                                                                                       |
| Otu1361 | 0        | 0       | 0       | 0       | 0       | 0       | 1         | 0         | 0         | 0         | 9         | 0         | Bacteria; Cyanobacteria; Nostocophycidae; Nostocales; Nostocaceae                                                              |
| Otu1360 | 4        | 2       | 3       | 10      | 1       | 8       | 2         | 4         | 12        | 5         | 1         | 2         | Bacteria; Bacteroidetes; Saprospirae; Saprospirales; Chitinophagaceae                                                          |
| Otu1369 | 3        | 2       | 1       | 0       | 1       | 1       | 0         | 1         | 1         | 0         | 6         | 0         | Bacteria; Actinobacteria; Actinobacteria; Actinomycetales; Micromonosporaceae; Catellatospora                                  |
| Otu1368 | 4        | 3       | 10      | 9       | 9       | 2       | 4         | 6         | 8         | 1         | 9         | 0         | Bacteria; Tenericutes; Mollicutes; Anaeroplasmatales; Anaeroplasmataceae; Asteroleplasma                                       |
| Otu2458 | 0        | 1       | 0       | 2       | 0       | 1       | 1         | 0         | 1         | 0         | 0         | 1         | Bacteria; Proteobacteria; Alphaproteobacteria; Rhizobiales                                                                     |
| Otu2629 | 4        | 0       | 2       | 3       | 0       | 5       | 2         | 3         | 6         | 8         | 1         | 4         | Bacteria; Chlorobi                                                                                                             |
| Otu2628 | 0        | 0       | 2       | 1       | 0       | 2       | 0         | 2         | 0         | 0         | 0         | 0         | Bacteria; Proteobacteria; Deltaproteobacteria; Bdellovibrionales; Bdellovibrionaceae; Bdellovibrio; Bdellovibrio_bacteriovorus |
| Otu2627 | 1        | 2       | 2       | 1       | 0       | 1       | 3         | 0         | 1         | 0         | 2         | 0         | Bacteria; Actinobacteria; Acidimicrobia; Acidimicrobiales; AKIW874                                                             |
| Otu2626 | 1        | 3       | 4       | 2       | 3       | 0       | 4         | 4         | 1         | 3         | 8         | 3         | Bacteria; Actinobacteria; Thermoleophilia; Solirubrobacterales; Patulibacteraceae                                              |
| Otu2625 | 1        | 0       | 0       | 0       | 1       | 3       | 1         | 0         | 1         | 1         | 2         | 1         | Bacteria; Cyanobacteria; ML635J-21                                                                                             |
| Otu2624 | 2        | 0       | 0       | 0       | 0       | 0       | 0         | 0         | 0         | 0         | 0         | 0         | Bacteria; Planctomycetes; Phycisphaerae                                                                                        |
| Otu2623 | 0        | 0       | 3       | 0       | 0       | 0       | 5         | 0         | 1         | 1         | 0         | 0         | Bacteria                                                                                                                       |
| Otu2622 | 0        | 3       | 1       | 2       | 1       | 1       | 1         | 1         | 1         | 1         | 1         | 0         | Bacteria; Proteobacteria; Alphaproteobacteria; Rhodospirillales; Rhodospirillaceae                                             |
| Otu2621 | 0        | 1       | 0       | 1       | 0       | 2       | 2         | 0         | 0         | 1         | 2         | 1         | Bacteria; Proteobacteria; Gammaproteobacteria; Legionellales; Coxiellaceae                                                     |
| Otu2459 | 0        | 0       | 0       | 0       | 0       | 0       | 0         | 0         | 0         | 0         | 2         | 0         | Bacteria; Proteobacteria; Deltaproteobacteria; FAC87                                                                           |
| Otu130  | 36       | 84      | 57      | 35      | 94      | 30      | 40        | 17        | 20        | 23        | 94        | 14        | Bacteria; Chloroflexi; Anaerolineae; GCA004                                                                                    |
| Otu131  | 48       | 63      | 66      | 72      | 81      | 80      | 36        | 35        | 33        | 59        | 92        | 35        | Bacteria; Chloroflexi; Anaerolineae; SBR1031; oc28                                                                             |
| Otu132  | 185      | 44      | 52      | 120     | 48      | 59      | 42        | 34        | 29        | 111       | 108       | 46        | Bacteria; Verrucomicrobia; Pedosphaerae; Pedosphaerales                                                                        |
| Otu133  | 267      | 142     | 123     | 215     | 187     | 127     | 186       | 118       | 56        | 304       | 247       | 86        | Bacteria; Acidobacteria; Chloracidobacteria; RB41; Ellin6075                                                                   |
| Otu134  | 4        | 12      | 44      | 24      | 19      | 48      | 109       | 11        | 20        | 32        | 112       | 26        | Bacteria; Firmicutes; Bacilli; Bacillales; Bacillaceae; Bacillus; Bacillus_cereus                                              |

| #OTU ID | Z31DSO1r | Z31DSO2 | Z31DSO3 | Z31DSO4 | Z31DSO5 | Z31DSO6 | Z31JDSO1 | Z31JDSO2 | Z31JDSO3 | Z31JDSO4 | Z31JDSO5 | Z31JDSO6 | taxonomy                                                                                                                 |
|---------|----------|---------|---------|---------|---------|---------|----------|----------|----------|----------|----------|----------|--------------------------------------------------------------------------------------------------------------------------|
| Otu135  | 47       | 7       | 28      | 49      | 8       | 68      | 58       | 102      | 78       | 82       | 48       | 111      | Bacteria; Acidobacteria; Acidobacteriia; Acidobacteriales; Koribacteraceae                                               |
| Otu136  | 17       | 33      | 23      | 72      | 14      | 29      | 93       | 89       | 59       | 26       | 70       | 29       | Bacteria; Actinobacteria; Thermoleophilia; Solirubrobacterales                                                           |
| Otu137  | 124      | 16      | 34      | 31      | 12      | 27      | 18       | 11       | 17       | 32       | 12       | 35       | Bacteria; Proteobacteria; Gammaproteobacteria                                                                            |
| Otu138  | 35       | 24      | 19      | 88      | 12      | 43      | 36       | 84       | 26       | 79       | 32       | 74       | Bacteria; Bacteroidetes; Saprospirae; Saprospirales; Chitinophagaceae                                                    |
| Otu139  | 37       | 15      | 45      | 108     | 22      | 119     | 109      | 162      | 170      | 131      | 72       | 140      | Bacteria; Acidobacteria; Acidobacteriia; Acidobacteriales; Koribacteraceae; Candidatus_Koribacter                        |
| Otu918  | 4        | 0       | 2       | 2       | 1       | 10      | 1        | 0        | 0        | 1        | 1        | 0        | Bacteria; Chloroflexi; Anaerolineae; CFB-26                                                                              |
| Otu919  | 17       | 6       | 1       | 0       | 2       | 10      | 0        | 2        | 2        | 5        | 7        | 2        | Bacteria; Proteobacteria; Deltaproteobacteria; Myxococcales                                                              |
| Otu916  | 4        | 0       | 10      | 10      | 3       | 2       | 12       | 2        | 3        | 4        | 15       | 0        | Bacteria; Proteobacteria; Gammaproteobacteria                                                                            |
| Otu917  | 1        | 10      | 0       | 0       | 2       | 0       | 0        | 0        | 0        | 0        | 10       | 0        | Bacteria; TM7; SC3                                                                                                       |
| Otu914  | 12       | 7       | 7       | 4       | 9       | 5       | 2        | 2        | 4        | 0        | 14       | 3        | Bacteria; Chloroflexi; Anaerolineae; SBR1031; oc28                                                                       |
| Otu915  | 5        | 2       | 2       | 8       | 0       | 1       | 4        | 1        | 11       | 14       | 4        | 3        | Bacteria; Proteobacteria; Alphaproteobacteria                                                                            |
| Otu912  | 22       | 11      | 12      | 7       | 9       | 5       | 21       | 5        | 6        | 5        | 17       | 2        | Bacteria; Acidobacteria; Solibacteres; Solibacterales                                                                    |
| Otu913  | 0        | 0       | 1       | 0       | 1       | 0       | 1        | 0        | 7        | 10       | 0        | 0        | Bacteria; Cyanobacteria; 4C0d-2; SM1D11                                                                                  |
| Otu910  | 2        | 0       | 0       | 10      | 4       | 3       | 1        | 4        | 4        | 0        | 2        | 2        | Bacteria                                                                                                                 |
| Otu911  | 14       | 3       | 7       | 9       | 0       | 7       | 19       | 16       | 9        | 7        | 4        | 6        | Bacteria; Proteobacteria; Deltaproteobacteria; Myxococcales                                                              |
| Otu3004 | 0        | 0       | 0       | 0       | 0       | 0       | 0        | 0        | 4        | 0        | 0        | 0        | Bacteria; OD1; ZB2                                                                                                       |
| Otu3005 | 0        | 92      | 0       | 0       | 0       | 0       | 9        | 4        | 0        | 1        | 0        | 5        | Bacteria; Bacteroidetes; Flavobacteriia; Flavobacteriales; Flavobacteriaceae; Flavobacterium; Flavobacterium_succinicans |
| Otu2539 | 3        | 3       | 3       | 5       | 2       | 16      | 8        | 10       | 11       | 6        | 8        | 13       | Bacteria; Proteobacteria; Deltaproteobacteria; Myxococcales; Haliangiaceae                                               |
| Otu2538 | 0        | 0       | 0       | 3       | 0       | 0       | 0        | 1        | 0        | 1        | 0        | 0        | Bacteria                                                                                                                 |
| Otu3000 | 0        | 3       | 0       | 1       | 0       | 0       | 0        | 0        | 0        | 2        | 1        | 0        | Bacteria; OD1                                                                                                            |
| Otu3001 | 2        | 1       | 1       | 0       | 0       | 0       | 1        | 0        | 0        | 0        | 0        | 0        | Bacteria; Proteobacteria; Deltaproteobacteria; Myxococcales                                                              |
| Otu3002 | 0        | 0       | 0       | 1       | 0       | 0       | 2        | 0        | 0        | 1        | 0        | 1        | Bacteria; Planctomycetes; Planctomycetia; Gemmatales; Gemmataceae; Gemmata                                               |

| #OTU ID | Z31DSO1r | Z31DSO2 | Z31DSO3 | Z31DSO4 | Z31DSO5 | Z31DSO6 | Z31JDSO1 | Z31JDSO2 | Z31JDSO3 | Z31JDSO4 | Z31JDSO5 | Z31JDSO6 | taxonomy                                                                                     |
|---------|----------|---------|---------|---------|---------|---------|----------|----------|----------|----------|----------|----------|----------------------------------------------------------------------------------------------|
| Otu3003 | 0        | 0       | 0       | 0       | 0       | 0       | 0        | 0        | 1        | 2        | 1        | 1        | Bacteria; Bacteroidetes; Sphingobacteriia; Sphingobacteriales                                |
| Otu2533 | 2        | 0       | 1       | 1       | 3       | 1       | 2        | 0        | 0        | 1        | 2        | 1        | Bacteria; Proteobacteria; Alphaproteobacteria                                                |
| Otu2532 | 0        | 2       | 0       | 0       | 1       | 0       | 0        | 0        | 0        | 0        | 0        | 0        | Bacteria                                                                                     |
| Otu2531 | 0        | 2       | 0       | 0       | 0       | 0       | 0        | 0        | 0        | 0        | 0        | 0        | Bacteria; Acidobacteria; Solibacteres; Solibacterales                                        |
| Otu2530 | 0        | 2       | 0       | 0       | 0       | 0       | 1        | 0        | 0        | 0        | 0        | 0        | Bacteria; Gemmatimonadetes; Gemmatimonadetes                                                 |
| Otu2537 | 2        | 0       | 0       | 2       | 0       | 0       | 1        | 0        | 1        | 2        | 1        | 1        | Bacteria; Proteobacteria; Gammaproteobacteria; Alteromonadales; Alteromonadaceae; Cellvibrio |
| Otu2536 | 2        | 1       | 2       | 0       | 1       | 0       | 2        | 0        | 0        | 0        | 2        | 0        | Bacteria; Planctomycetes; Planctomycetia; Gemmatales; Isosphaeraceae                         |
| Otu2535 | 0        | 0       | 0       | 0       | 0       | 0       | 2        | 0        | 2        | 0        | 1        | 0        | Bacteria; Proteobacteria; Alphaproteobacteria; Rhodospirillales; Acetobacteraceae            |
| Otu2534 | 2        | 0       | 0       | 0       | 0       | 0       | 0        | 0        | 0        | 0        | 0        | 0        | Bacteria; Acidobacteria; Solibacteres; Solibacterales                                        |
| Otu624  | 5        | 24      | 13      | 16      | 15      | 25      | 39       | 12       | 10       | 17       | 40       | 11       | Bacteria; Firmicutes; Bacilli; Bacillales; Planococcaceae                                    |
| Otu625  | 2        | 2       | 1       | 3       | 2       | 5       | 4        | 12       | 0        | 5        | 3        | 1        | Bacteria; TM6; SJA-4                                                                         |
| Otu626  | 15       | 2       | 4       | 2       | 2       | 1       | 2        | 1        | 2        | 1        | 3        | 0        | Bacteria; Planctomycetes; Phycisphaerae; WD2101                                              |
| Otu620  | 0        | 0       | 1       | 1       | 0       | 14      | 2        | 2        | 11       | 7        | 2        | 11       | Bacteria; Chloroflexi; Ktedonobacteria                                                       |
| Otu621  | 14       | 5       | 9       | 5       | 4       | 2       | 18       | 5        | 8        | 2        | 11       | 3        | Bacteria; Chloroflexi; C0119                                                                 |
| Otu622  | 3        | 16      | 14      | 12      | 11      | 8       | 5        | 0        | 2        | 9        | 10       | 7        | Bacteria; Chlorobi                                                                           |
| Otu623  | 2        | 1       | 2       | 6       | 3       | 5       | 4        | 8        | 11       | 19       | 5        | 11       | Bacteria; Proteobacteria; TA18; PHOS-HD29                                                    |
| Otu2480 | 0        | 0       | 0       | 0       | 0       | 2       | 0        | 0        | 0        | 0        | 0        | 0        | Bacteria; Proteobacteria; Deltaproteobacteria; Myxococcales                                  |
| Otu628  | 15       | 2       | 6       | 6       | 5       | 3       | 11       | 4        | 2        | 2        | 12       | 0        | Bacteria; Proteobacteria; Deltaproteobacteria; Syntrophobacteriales; Syntrophobacteraceae    |
| Otu629  | 16       | 5       | 1       | 6       | 2       | 1       | 6        | 1        | 5        | 5        | 7        | 2        | Bacteria; Armatimonadetes; Fimbriimonadia; Fimbriimonadales; Fimbriimonadaceae; Fimbriimonas |
| Otu1943 | 0        | 0       | 0       | 2       | 0       | 0       | 3        | 1        | 2        | 0        | 0        | 1        | Bacteria; Proteobacteria; Deltaproteobacteria; Myxococcales                                  |
| Otu1942 | 2        | 0       | 3       | 6       | 0       | 1       | 4        | 1        | 0        | 3        | 1        | 1        | Bacteria; Proteobacteria; Gammaproteobacteria                                                |
| Otu1941 | 1        | 0       | 1       | 0       | 0       | 1       | 4        | 0        | 2        | 0        | 0        | 0        | Bacteria; Planctomycetes; Planctomycetia; Gemmatales; Gemmataceae                            |

| #OTU ID | Z31DSO1r | Z31DSO2 | Z31DSO3 | Z31DSO4 | Z31DSO5 | Z31DSO6 | Z31JDSO1 | Z31JDSO2 | Z31JDSO3 | Z31JDSO4 | Z31JDSO5 | Z31JDSO6 | taxonomy                                                                                               |
|---------|----------|---------|---------|---------|---------|---------|----------|----------|----------|----------|----------|----------|--------------------------------------------------------------------------------------------------------|
| Otu1940 | 3        | 0       | 1       | 0       | 0       | 0       | 0        | 0        | 0        | 0        | 0        | 0        | Bacteria; Bacteroidetes; Cytophagia; Cytophagales; Cytophagaceae; Sporocytophaga                       |
| Otu1947 | 3        | 0       | 0       | 0       | 1       | 1       | 2        | 0        | 1        | 0        | 1        | 0        | Bacteria; Elusimicrobia; Elusimicrobia; FAC88                                                          |
| Otu1946 | 3        | 1       | 1       | 1       | 1       | 1       | 4        | 0        | 0        | 1        | 3        | 1        | Bacteria; Planctomycetes; vadinHA49; DH61                                                              |
| Otu1945 | 1        | 1       | 1       | 0       | 0       | 1       | 0        | 0        | 0        | 0        | 4        | 1        | Bacteria; Cyanobacteria; ML635J-21                                                                     |
| Otu1944 | 8        | 0       | 4       | 2       | 4       | 5       | 0        | 0        | 0        | 1        | 4        | 3        | Bacteria; Chloroflexi; Anaerolineae; SBR1031; A4b                                                      |
| Otu1949 | 1        | 4       | 5       | 10      | 3       | 2       | 10       | 5        | 5        | 7        | 6        | 4        | Bacteria; Gemmatimonadetes; Gemmatimonadetes; Gemmatimonadales                                         |
| Otu1948 | 3        | 0       | 1       | 2       | 4       | 0       | 0        | 0        | 0        | 2        | 1        | 2        | Bacteria; Bacteroidetes; Cytophagia; Cytophagales; Cytophagaceae                                       |
| Otu2447 | 0        | 0       | 0       | 1       | 1       | 2       | 0        | 3        | 1        | 0        | 1        | 0        | Bacteria; Actinobacteria; Thermoleophilia; Solirubrobacterales                                         |
| Otu242  | 70       | 28      | 44      | 66      | 23      | 39      | 35       | 28       | 35       | 43       | 44       | 35       | Bacteria; Acidobacteria; Solibacteres; Solibacterales; Solibacteraceae; Candidatus_Solibacter          |
| Otu828  | 8        | 13      | 9       | 4       | 11      | 5       | 2        | 1        | 3        | 0        | 4        | 5        | Bacteria; Verrucomicrobia; Opiritae; Opiritales; Opiritaceae                                           |
| Otu829  | 12       | 4       | 6       | 17      | 5       | 3       | 2        | 0        | 0        | 11       | 26       | 5        | Bacteria; Bacteroidetes; Cytophagia; Cytophagales; Cytophagaceae                                       |
| Otu2443 | 2        | 1       | 2       | 3       | 0       | 2       | 1        | 1        | 1        | 1        | 0        | 0        | Bacteria                                                                                               |
| Otu2442 | 1        | 0       | 1       | 0       | 0       | 0       | 2        | 0        | 3        | 0        | 2        | 1        | Bacteria                                                                                               |
| Otu2441 | 3        | 1       | 0       | 0       | 0       | 0       | 0        | 0        | 0        | 0        | 0        | 0        | Bacteria; Chloroflexi; Anaerolineae; SBR1031; SHA-31                                                   |
| Otu243  | 29       | 6       | 41      | 32      | 21      | 30      | 48       | 20       | 23       | 18       | 37       | 12       | Bacteria; Chloroflexi; C0119                                                                           |
| Otu822  | 9        | 5       | 14      | 12      | 6       | 11      | 11       | 2        | 5        | 1        | 4        | 10       | Bacteria; Proteobacteria; Deltaproteobacteria; Myxococcales; Haliangiaceae                             |
| Otu823  | 0        | 0       | 1       | 2       | 0       | 1       | 2        | 0        | 0        | 10       | 0        | 3        | Bacteria; Proteobacteria; Gammaproteobacteria; Legionellales                                           |
| Otu820  | 4        | 17      | 18      | 13      | 12      | 8       | 10       | 5        | 15       | 7        | 4        | 6        | Bacteria; Verrucomicrobia; Verrucomicrobiae; Verrucomicrobiales; Verrucomicrobiaceae; Prostheco bacter |
| Otu821  | 14       | 3       | 11      | 12      | 6       | 6       | 17       | 2        | 3        | 4        | 13       | 2        | Bacteria; Actinobacteria; Thermoleophilia; Gaiellales; Gaiellaceae                                     |
| Otu826  | 15       | 3       | 2       | 7       | 3       | 1       | 7        | 3        | 4        | 3        | 1        | 5        | Bacteria; Proteobacteria; Alphaproteobacteria; Rhodospirillales; Acetobacteraceae                      |
| Otu827  | 0        | 0       | 1       | 7       | 1       | 1       | 0        | 0        | 10       | 1        | 9        | 0        | Bacteria; Proteobacteria; TA18; CV90                                                                   |
| Otu824  | 2        | 2       | 9       | 2       | 7       | 3       | 2        | 1        | 2        | 2        | 4        | 0        | Bacteria; Armatimonadetes; Fimbriimonadia; Fimbriimonadales; Fimbriimonadaceae                         |



| #OTU ID | Z31DSO1r | Z31DSO2 | Z31DSO3 | Z31DSO4 | Z31DSO5 | Z31DSO6 | Z31JDSO1 | Z31JDSO2 | Z31JDSO3 | Z31JDSO4 | Z31JDSO5 | Z31JDSO6 | taxonomy                                                                                           |
|---------|----------|---------|---------|---------|---------|---------|----------|----------|----------|----------|----------|----------|----------------------------------------------------------------------------------------------------|
| Otu825  | 10       | 1       | 1       | 4       | 3       | 3       | 3        | 1        | 2        | 7        | 7        | 1        | Bacteria; Verrucomicrobia; Pedosphaerae; Pedosphaerales; Ellin517                                  |
| Otu241  | 60       | 120     | 44      | 33      | 24      | 25      | 42       | 21       | 28       | 83       | 37       | 40       | Bacteria; Bacteroidetes; Saprospirae; Saprospirales; Chitinophagaceae; Niastella                   |
| Otu246  | 139      | 278     | 527     | 298     | 155     | 144     | 250      | 476      | 281      | 219      | 148      | 431      | Bacteria; Bacteroidetes; Sphingobacteriia; Sphingobacteriales; Sphingobacteriaceae                 |
| Otu3428 | 3        | 0       | 0       | 0       | 0       | 0       | 0        | 0        | 0        | 0        | 0        | 0        | Bacteria                                                                                           |
| Otu247  | 56       | 2       | 7       | 8       | 2       | 10      | 5        | 4        | 8        | 3        | 3        | 3        | Bacteria; Planctomycetes; Phycisphaerae; Phycisphaerales                                           |
| Otu244  | 1        | 3       | 8       | 9       | 3       | 1       | 69       | 2        | 3        | 2        | 4        | 2        | Bacteria; Proteobacteria; Alphaproteobacteria; Rhizobiales; Xanthobacteraceae; Labrys              |
| Otu245  | 7        | 24      | 24      | 42      | 24      | 51      | 25       | 51       | 49       | 7        | 26       | 22       | Bacteria; Chloroflexi; Anaerolineae; SBR1031; oc28                                                 |
| Otu2148 | 1        | 0       | 0       | 2       | 1       | 0       | 1        | 0        | 0        | 0        | 4        | 0        | Bacteria; Planctomycetes; Planctomycetia; Gemmatales; Gemmataceae                                  |
| Otu2149 | 0        | 3       | 0       | 0       | 0       | 0       | 0        | 0        | 2        | 0        | 0        | 1        | Bacteria; Proteobacteria; Alphaproteobacteria; Rhodobacterales; Hyphomonadaceae                    |
| Otu2142 | 0        | 2       | 0       | 1       | 0       | 3       | 0        | 1        | 1        | 0        | 1        | 0        | Bacteria                                                                                           |
| Otu2143 | 3        | 4       | 0       | 5       | 2       | 3       | 1        | 1        | 1        | 1        | 1        | 1        | Bacteria; Planctomycetes; Planctomycetia; Pirellulales; Pirellulaceae                              |
| Otu2140 | 9        | 7       | 6       | 2       | 3       | 6       | 10       | 1        | 0        | 1        | 7        | 1        | Bacteria; Actinobacteria; Actinobacteria; Actinomycetales; Micromonosporaceae                      |
| Otu2141 | 14       | 0       | 3       | 4       | 4       | 13      | 5        | 6        | 5        | 10       | 12       | 6        | Bacteria; Proteobacteria; Alphaproteobacteria; Caulobacterales; Caulobacteraceae                   |
| Otu2146 | 3        | 0       | 0       | 0       | 1       | 0       | 0        | 1        | 3        | 1        | 0        | 0        | Bacteria; Proteobacteria; Deltaproteobacteria; Bdellovibrionales; Bdellovibrionaceae; Bdellovibrio |
| Otu2147 | 4        | 2       | 3       | 1       | 1       | 1       | 1        | 0        | 1        | 4        | 1        | 1        | Bacteria; Planctomycetes; Phycisphaerae; Phycisphaerales; Phycisphaeraceae                         |
| Otu2144 | 1        | 0       | 2       | 0       | 2       | 1       | 0        | 0        | 0        | 0        | 6        | 0        | Bacteria; Proteobacteria; Gammaproteobacteria; Legionellales; Coxiellaceae; Aquicella              |
| Otu2145 | 0        | 0       | 3       | 0       | 1       | 1       | 10       | 3        | 1        | 4        | 2        | 3        | Bacteria; Firmicutes; Bacilli; Bacillales                                                          |
| Otu1891 | 4        | 0       | 0       | 0       | 0       | 1       | 0        | 0        | 0        | 0        | 0        | 0        | Bacteria; Cyanobacteria; Synechococcophycideae; Pseudanabaenales; Pseudanabaenaceae; Leptolyngbya  |
| Otu1890 | 0        | 0       | 0       | 3       | 0       | 0       | 0        | 1        | 0        | 1        | 0        | 0        | Bacteria; Proteobacteria; Gammaproteobacteria; Legionellales; Coxiellaceae                         |
| Otu1893 | 0        | 0       | 0       | 3       | 1       | 0       | 0        | 0        | 0        | 0        | 1        | 0        | Bacteria; TM6; SJA-4                                                                               |
| Otu1892 | 0        | 1       | 1       | 3       | 1       | 1       | 1        | 0        | 1        | 1        | 3        | 1        | Bacteria; Firmicutes; Bacilli; Bacillales; Alicyclobacillaceae; Alicyclobacillus                   |
| Otu1895 | 1        | 0       | 0       | 0       | 0       | 0       | 1        | 1        | 0        | 0        | 3        | 1        | Bacteria; Bacteroidetes; Cytophagia; Cytophagales; Cytophagaceae; Sporocytophaga                   |

| #OTU ID | Z31DSO1r | Z31DSO2 | Z31DSO3 | Z31DSO4 | Z31DSO5 | Z31DSO6 | Z31J1DSO1 | Z31J1DSO2 | Z31J1DSO3 | Z31J1DSO4 | Z31J1DSO5 | Z31J1DSO6 | taxonomy                                                                                                          |
|---------|----------|---------|---------|---------|---------|---------|-----------|-----------|-----------|-----------|-----------|-----------|-------------------------------------------------------------------------------------------------------------------|
| Otu1894 | 0        | 0       | 0       | 0       | 0       | 0       | 0         | 0         | 3         | 0         | 0         | 1         | Bacteria; Armatimonadetes; Fimbriimonadia; Fimbriimonadales; Fimbriimonadaceae; Fimbriimonas                      |
| Otu1897 | 6        | 1       | 3       | 2       | 1       | 2       | 6         | 1         | 2         | 2         | 6         | 2         | Bacteria; Actinobacteria; Actinobacteria; Actinomycetales                                                         |
| Otu1896 | 0        | 0       | 0       | 0       | 0       | 0       | 0         | 0         | 5         | 0         | 0         | 0         | Bacteria; Actinobacteria                                                                                          |
| Otu1899 | 0        | 0       | 0       | 1       | 0       | 0       | 0         | 0         | 0         | 1         | 7         | 0         | Bacteria; ODI; SM2F11                                                                                             |
| Otu1898 | 1        | 5       | 0       | 1       | 0       | 1       | 1         | 0         | 0         | 1         | 0         | 1         | Bacteria; Planctomycetes; OM190; agg27                                                                            |
| Otu3365 | 0        | 5       | 1       | 0       | 0       | 0       | 0         | 1         | 0         | 0         | 0         | 1         | Bacteria; Acidobacteria; PAUC37f                                                                                  |
| Otu2036 | 1        | 2       | 1       | 0       | 0       | 1       | 0         | 1         | 3         | 0         | 1         | 0         | Bacteria; Elusimicrobia; Elusimicrobia; FAC88                                                                     |
| Otu2037 | 6        | 1       | 0       | 1       | 0       | 2       | 1         | 2         | 3         | 5         | 2         | 1         | Bacteria; Proteobacteria; Deltaproteobacteria; Myxococcales                                                       |
| Otu2034 | 2        | 2       | 2       | 0       | 1       | 0       | 2         | 0         | 0         | 0         | 3         | 1         | Bacteria; Planctomycetes; Planctomycetia; Gemmatales; Gemmataceae                                                 |
| Otu2035 | 105      | 73      | 167     | 201     | 62      | 334     | 325       | 336       | 298       | 330       | 185       | 414       | Bacteria; Acidobacteria; Acidobacteriia; Acidobacteriales; Koribacteraceae; Candidatus_Koribacter                 |
| Otu2032 | 3        | 1       | 0       | 1       | 1       | 0       | 0         | 0         | 0         | 0         | 0         | 1         | Bacteria; WS3; PRR-12; Sediment-1; PRR-10                                                                         |
| Otu2033 | 5        | 1       | 4       | 7       | 7       | 12      | 0         | 0         | 3         | 1         | 7         | 0         | Bacteria; Proteobacteria; Deltaproteobacteria; Desulfuromonadales; Geobacteraceae; Geobacter                      |
| Otu2030 | 3        | 0       | 1       | 1       | 0       | 0       | 1         | 0         | 0         | 0         | 0         | 0         | Bacteria; Gemmatimonadetes; Gemm-1                                                                                |
| Otu2031 | 3        | 1       | 3       | 0       | 0       | 3       | 2         | 0         | 0         | 0         | 2         | 0         | Bacteria; Acidobacteria; Solibacteres; Solibacterales                                                             |
| Otu2038 | 3        | 0       | 0       | 0       | 0       | 0       | 0         | 0         | 0         | 0         | 0         | 0         | Bacteria; Proteobacteria; Alphaproteobacteria                                                                     |
| Otu2039 | 3        | 7       | 1       | 0       | 2       | 1       | 0         | 0         | 0         | 0         | 0         | 5         | Bacteria; WS3; PRR-12; Sediment-1; PRR-10                                                                         |
| Otu1769 | 0        | 0       | 0       | 0       | 0       | 0       | 0         | 0         | 1         | 0         | 3         | 0         | Bacteria; Proteobacteria; Deltaproteobacteria; Bdellovibrionales; Bdellovibrionaceae                              |
| Otu1768 | 2        | 0       | 0       | 1       | 0       | 5       | 5         | 1         | 1         | 1         | 0         | 3         | Bacteria; Planctomycetes; Planctomycetia; Gemmatales; Gemmataceae                                                 |
| Otu2446 | 0        | 0       | 3       | 1       | 1       | 3       | 4         | 1         | 2         | 1         | 1         | 3         | Bacteria; Actinobacteria; Actinobacteria; Actinomycetales; Mycobacteriaceae; Mycobacterium; Mycobacterium_celatum |
| Otu1763 | 4        | 0       | 0       | 0       | 2       | 0       | 3         | 0         | 0         | 0         | 3         | 0         | Bacteria                                                                                                          |
| Otu1762 | 0        | 0       | 0       | 3       | 1       | 0       | 0         | 0         | 0         | 0         | 0         | 0         | Bacteria; Chlamydiae; Chlamydia; Chlamydiales; Parachlamydiaceae                                                  |
| Otu1761 | 0        | 3       | 0       | 1       | 0       | 0       | 0         | 0         | 0         | 0         | 0         | 6         | Bacteria; Chlamydiae; Chlamydia; Chlamydiales; Rhabdochlamydiaceae; Candidatus_Rhabdochlamydia                    |

| #OTU ID | Z31DSO1r | Z31DSO2 | Z31DSO3 | Z31DSO4 | Z31DSO5 | Z31DSO6 | Z31JDSO1 | Z31JDSO2 | Z31JDSO3 | Z31JDSO4 | Z31JDSO5 | Z31JDSO6 | taxonomy                                                                                                                          |
|---------|----------|---------|---------|---------|---------|---------|----------|----------|----------|----------|----------|----------|-----------------------------------------------------------------------------------------------------------------------------------|
| Otu1760 | 0        | 0       | 0       | 0       | 0       | 0       | 4        | 0        | 0        | 0        | 0        | 0        | Bacteria; Verrucomicrobia; Verrucomicrobiae; Verrucomicrobiales; Verrucomicrobiaceae; Prostheco bacter; Prostheco bacter_debontii |
| Otu1767 | 0        | 0       | 1       | 0       | 0       | 3       | 0        | 1        | 2        | 1        | 2        | 1        | Bacteria; Proteobacteria; Deltaproteobacteria; Myxococcales                                                                       |
| Otu1766 | 2        | 5       | 3       | 0       | 3       | 1       | 0        | 0        | 0        | 1        | 4        | 0        | Bacteria; Bacteroidetes                                                                                                           |
| Otu1765 | 0        | 0       | 0       | 3       | 4       | 1       | 0        | 0        | 0        | 0        | 1        | 0        | Bacteria                                                                                                                          |
| Otu1764 | 0        | 0       | 0       | 0       | 1       | 0       | 0        | 1        | 0        | 3        | 0        | 0        | Bacteria; Bacteroidetes; Saprospirae; Saprospirales; Chitinophagaceae; Segetibacter                                               |
| Otu2445 | 0        | 0       | 0       | 0       | 0       | 2       | 0        | 0        | 0        | 0        | 0        | 0        | Bacteria; Firmicutes; Bacilli; Bacillales                                                                                         |
| Otu3366 | 2        | 2       | 0       | 3       | 1       | 0       | 0        | 0        | 0        | 0        | 0        | 0        | Bacteria; Proteobacteria; Betaproteobacteria; SC-I-84                                                                             |
| Otu1420 | 1        | 0       | 3       | 0       | 1       | 0       | 0        | 0        | 0        | 1        | 4        | 0        | Bacteria; Chloroflexi; Anaerolineae; A31; S47                                                                                     |
| Otu1421 | 12       | 4       | 6       | 5       | 5       | 0       | 2        | 1        | 1        | 5        | 15       | 1        | Bacteria; Acidobacteria; Chloracidobacteria; RB41                                                                                 |
| Otu1422 | 0        | 4       | 1       | 1       | 1       | 0       | 0        | 3        | 0        | 6        | 1        | 2        | Bacteria; Proteobacteria; Gammaproteobacteria; Legionellales                                                                      |
| Otu1423 | 6        | 2       | 0       | 1       | 1       | 1       | 0        | 1        | 4        | 0        | 3        | 0        | Bacteria; Proteobacteria; Betaproteobacteria; MND1                                                                                |
| Otu1424 | 3        | 1       | 4       | 3       | 0       | 0       | 5        | 5        | 5        | 3        | 15       | 2        | Bacteria; Firmicutes; Clostridia; Clostridiales; Clostridiaceae; Clostridium                                                      |
| Otu1425 | 4        | 1       | 1       | 4       | 2       | 4       | 3        | 0        | 1        | 9        | 4        | 3        | Bacteria; Proteobacteria; Alphaproteobacteria                                                                                     |
| Otu1426 | 0        | 0       | 0       | 5       | 2       | 1       | 0        | 0        | 2        | 6        | 1        | 3        | Bacteria; Verrucomicrobia; Pedosphaerae; Pedosphaerales                                                                           |
| Otu1427 | 1        | 3       | 2       | 7       | 7       | 4       | 5        | 3        | 9        | 1        | 2        | 4        | Bacteria; Chloroflexi; Anaerolineae; SBR1031; oc28                                                                                |
| Otu1428 | 0        | 1       | 2       | 5       | 0       | 2       | 0        | 0        | 0        | 0        | 1        | 0        | Bacteria; Verrucomicrobia; Spartobacteria; Chthoniobacteriales; Chthoniobacteraceae                                               |
| Otu1429 | 0        | 3       | 3       | 3       | 0       | 6       | 2        | 6        | 10       | 11       | 3        | 5        | Bacteria; Proteobacteria; Alphaproteobacteria                                                                                     |
| Otu2019 | 4        | 0       | 2       | 2       | 4       | 2       | 2        | 0        | 1        | 2        | 1        | 3        | Bacteria; Armatimonadetes; OPB50                                                                                                  |
| Otu3130 | 0        | 0       | 0       | 0       | 0       | 0       | 0        | 0        | 0        | 1        | 0        | 2        | Bacteria; Elusimicrobia; Elusimicrobia; Iib                                                                                       |
| Otu3131 | 0        | 0       | 0       | 0       | 0       | 3       | 0        | 0        | 0        | 0        | 0        | 0        | Bacteria; Chlamydiae; Chlamydia; Chlamydiales                                                                                     |
| Otu3361 | 0        | 0       | 1       | 0       | 0       | 1       | 0        | 4        | 0        | 0        | 1        | 0        | Bacteria; Planctomycetes; Planctomycetia; Gemmatales; Isosphaeraeaceae                                                            |
| Otu3132 | 1        | 2       | 0       | 0       | 0       | 0       | 0        | 0        | 0        | 0        | 0        | 1        | Bacteria; Proteobacteria; Deltaproteobacteria; MIZ46                                                                              |

| #OTU ID | Z31DSO1r | Z31DSO2 | Z31DSO3 | Z31DSO4 | Z31DSO5 | Z31DSO6 | Z31J1DSO1 | Z31J1DSO2 | Z31J1DSO3 | Z31J1DSO4 | Z31J1DSO5 | Z31J1DSO6 | taxonomy                                                                                      |
|---------|----------|---------|---------|---------|---------|---------|-----------|-----------|-----------|-----------|-----------|-----------|-----------------------------------------------------------------------------------------------|
| Otu2014 | 0        | 1       | 1       | 1       | 1       | 3       | 1         | 1         | 8         | 4         | 4         | 2         | Bacteria; Actinobacteria; Thermoleophilia; Gaiellales; Gaiellaceae                            |
| Otu2376 | 0        | 2       | 0       | 0       | 1       | 1       | 4         | 0         | 0         | 0         | 1         | 1         | Bacteria; Proteobacteria; Deltaproteobacteria; Myxococcales                                   |
| Otu2015 | 1        | 0       | 0       | 6       | 0       | 1       | 1         | 0         | 0         | 0         | 0         | 0         | Bacteria; Proteobacteria; Alphaproteobacteria; Rickettsiales; mitochondria                    |
| Otu3134 | 3        | 0       | 1       | 0       | 0       | 0       | 4         | 1         | 0         | 0         | 3         | 0         | Bacteria; Proteobacteria; Deltaproteobacteria; Entotheonellales; Entotheonellaceae            |
| Otu3135 | 0        | 2       | 2       | 2       | 1       | 1       | 1         | 0         | 2         | 0         | 1         | 1         | Bacteria; Proteobacteria; Gammaproteobacteria; Legionellales; Coxiellaceae                    |
| Otu2858 | 0        | 0       | 1       | 2       | 0       | 0       | 0         | 0         | 0         | 2         | 0         | 0         | Bacteria                                                                                      |
| Otu2700 | 2        | 0       | 0       | 0       | 0       | 0       | 0         | 0         | 0         | 0         | 0         | 0         | Bacteria                                                                                      |
| Otu3136 | 1        | 0       | 0       | 2       | 1       | 1       | 2         | 2         | 2         | 2         | 0         | 2         | Bacteria; Actinobacteria; Acidimicrobiia; Acidimicrobiales                                    |
| Otu2701 | 3        | 1       | 0       | 1       | 0       | 0       | 0         | 1         | 1         | 0         | 0         | 0         | Bacteria; AD3; JG37-AG-4                                                                      |
| Otu2850 | 2        | 0       | 2       | 1       | 1       | 0       | 2         | 1         | 1         | 0         | 1         | 0         | Bacteria                                                                                      |
| Otu2851 | 5        | 0       | 0       | 1       | 1       | 2       | 0         | 1         | 2         | 0         | 0         | 1         | Bacteria; Proteobacteria; Gammaproteobacteria; Xanthomonadales; Xanthomonadaceae              |
| Otu2852 | 2        | 0       | 0       | 0       | 0       | 0       | 0         | 0         | 0         | 0         | 0         | 0         | Bacteria                                                                                      |
| Otu2853 | 2        | 1       | 1       | 3       | 2       | 0       | 3         | 0         | 0         | 0         | 1         | 2         | Bacteria; Actinobacteria; Actinobacteria; Actinomycetales; Micromonosporaceae; Catellatospora |
| Otu2854 | 2        | 2       | 0       | 0       | 0       | 0       | 1         | 0         | 2         | 2         | 1         | 0         | Bacteria; Actinobacteria; Acidimicrobiia; Acidimicrobiales; EB1017                            |
| Otu2855 | 0        | 0       | 0       | 2       | 0       | 0       | 0         | 0         | 0         | 0         | 0         | 0         | Bacteria                                                                                      |
| Otu2856 | 2        | 1       | 1       | 4       | 1       | 0       | 0         | 0         | 2         | 1         | 2         | 1         | Bacteria                                                                                      |
| Otu2857 | 0        | 0       | 0       | 0       | 1       | 0       | 3         | 0         | 0         | 0         | 0         | 0         | Bacteria; Chloroflexi; Gitt-GS-136                                                            |
| Otu1398 | 1        | 0       | 1       | 2       | 3       | 1       | 2         | 0         | 0         | 0         | 4         | 0         | Bacteria; Chloroflexi; Chloroflexi; Roseiflexales; Kouleothrixaceae                           |
| Otu1399 | 2        | 1       | 3       | 4       | 1       | 2       | 0         | 3         | 3         | 4         | 3         | 3         | Bacteria; Proteobacteria; Deltaproteobacteria; Myxococcales                                   |
| Otu1392 | 0        | 0       | 0       | 1       | 0       | 0       | 5         | 2         | 7         | 0         | 1         | 0         | Bacteria; Proteobacteria; Gammaproteobacteria; Legionellales; Coxiellaceae; Aquicella         |
| Otu1393 | 12       | 7       | 1       | 10      | 3       | 6       | 17        | 10        | 9         | 2         | 4         | 1         | Bacteria; Acidobacteria; Acidobacteria-6; iii1-15                                             |
| Otu1390 | 8        | 5       | 1       | 3       | 7       | 1       | 7         | 3         | 2         | 5         | 5         | 4         | Bacteria; Proteobacteria; Deltaproteobacteria; NB1-j                                          |

| #OTU ID | Z31DSO1r | Z31DSO2 | Z31DSO3 | Z31DSO4 | Z31DSO5 | Z31DSO6 | Z31JDSO1 | Z31JDSO2 | Z31JDSO3 | Z31JDSO4 | Z31JDSO5 | Z31JDSO6 | taxonomy                                                                                         |
|---------|----------|---------|---------|---------|---------|---------|----------|----------|----------|----------|----------|----------|--------------------------------------------------------------------------------------------------|
| Otu1391 | 10       | 6       | 5       | 1       | 7       | 9       | 12       | 10       | 19       | 13       | 11       | 4        | Bacteria; Bacteroidetes; Saprospirae; Saprospirales; Chitinophagaceae; Segetibacter              |
| Otu1396 | 1        | 7       | 3       | 2       | 3       | 7       | 0        | 1        | 4        | 3        | 3        | 7        | Bacteria; Proteobacteria; Alphaproteobacteria; Rhodospirillales; Rhodospirillaceae               |
| Otu1397 | 0        | 3       | 0       | 0       | 5       | 0       | 0        | 0        | 0        | 0        | 0        | 0        | Bacteria; OD1; SM2F11                                                                            |
| Otu1394 | 2        | 1       | 2       | 4       | 3       | 0       | 0        | 0        | 0        | 0        | 4        | 0        | Bacteria; Planctomycetes; vadinHA49; p04_C01                                                     |
| Otu1395 | 5        | 0       | 2       | 2       | 1       | 0       | 2        | 0        | 4        | 0        | 2        | 0        | Bacteria; Planctomycetes; Planctomycetia; Gemmatales; Isosphaeraceae                             |
| Otu29   | 39       | 19      | 41      | 22      | 21      | 15      | 290      | 12       | 21       | 318      | 22       | 20       | Bacteria; Proteobacteria; Alphaproteobacteria; Rhizobiales; Rhizobiaceae; Agrobacterium          |
| Otu25   | 670      | 304     | 356     | 658     | 267     | 394     | 555      | 548      | 473      | 464      | 496      | 372      | Bacteria; Planctomycetes; Phycisphaerae; WD2101                                                  |
| Otu27   | 263      | 124     | 219     | 339     | 114     | 355     | 320      | 368      | 334      | 555      | 285      | 446      | Bacteria; Acidobacteria; Acidobacteria; Acidobacteriales; Koribacteraceae; Candidatus_Koribacter |
| Otu26   | 335      | 110     | 218     | 365     | 191     | 93      | 303      | 76       | 115      | 302      | 314      | 60       | Bacteria; Verrucomicrobia; Spartobacteria; Chthoniobacteriales; Chthoniobacteraceae; DA101       |
| Otu21   | 64       | 106     | 321     | 61      | 15      | 99      | 546      | 52       | 240      | 64       | 4        | 106      | Bacteria; Bacteroidetes; Saprospirae; Saprospirales; Chitinophagaceae; Chitinophaga              |
| Otu20   | 650      | 342     | 543     | 609     | 194     | 383     | 721      | 881      | 661      | 645      | 529      | 501      | Bacteria; Acidobacteria; Acidobacteria; Acidobacteriales; Koribacteraceae; Candidatus_Koribacter |
| Otu23   | 316      | 142     | 356     | 178     | 204     | 136     | 600      | 142      | 218      | 243      | 192      | 198      | Bacteria; Proteobacteria; Alphaproteobacteria; Rhizobiales; Bradyrhizobiaceae; Bradyrhizobium    |
| Otu22   | 969      | 733     | 585     | 680     | 590     | 167     | 321      | 184      | 177      | 407      | 794      | 228      | Bacteria; Acidobacteria; Chloracidobacteria; RB41                                                |
| Otu2708 | 0        | 0       | 0       | 3       | 0       | 0       | 1        | 2        | 1        | 0        | 0        | 0        | Bacteria; Proteobacteria; Gammaproteobacteria; Legionellales                                     |
| Otu2709 | 0        | 1       | 0       | 1       | 1       | 0       | 0        | 4        | 0        | 0        | 1        | 0        | Bacteria                                                                                         |
| Otu3382 | 0        | 0       | 1       | 0       | 0       | 0       | 0        | 0        | 0        | 0        | 2        | 0        | Bacteria; OP3; PBS-25                                                                            |
| Otu3115 | 1        | 3       | 4       | 5       | 5       | 4       | 0        | 3        | 1        | 1        | 5        | 1        | Bacteria; Proteobacteria; Deltaproteobacteria; Myxococcales; Myxococcaceae; Anaeromyxobacter     |
| Otu3362 | 0        | 0       | 0       | 0       | 0       | 2       | 0        | 0        | 0        | 0        | 1        | 1        | Bacteria; Cyanobacteria                                                                          |
| Otu1086 | 0        | 0       | 2       | 2       | 6       | 0       | 5        | 0        | 1        | 1        | 8        | 1        | Bacteria; Bacteroidetes; Cytophagia; Cytophagales; Cytophagaceae; Hymenobacter                   |
| Otu1087 | 20       | 27      | 4       | 2       | 16      | 0       | 4        | 2        | 2        | 3        | 6        | 5        | Bacteria; Acidobacteria; Acidobacteria-6; iii1-15                                                |
| Otu1084 | 1        | 1       | 0       | 1       | 0       | 1       | 4        | 0        | 1        | 0        | 2        | 8        | Bacteria; Bacteroidetes; Cytophagia; Cytophagales; Cytophagaceae; Cytophaga                      |
| Otu1085 | 2        | 9       | 5       | 3       | 2       | 4       | 2        | 0        | 2        | 0        | 5        | 0        | Bacteria; Chloroflexi; Anaerolineae; H39                                                         |

| #OTU ID | Z31DSO1r | Z31DSO2 | Z31DSO3 | Z31DSO4 | Z31DSO5 | Z31DSO6 | Z31JDSO1 | Z31JDSO2 | Z31JDSO3 | Z31JDSO4 | Z31JDSO5 | Z31JDSO6 | taxonomy                                                                                      |
|---------|----------|---------|---------|---------|---------|---------|----------|----------|----------|----------|----------|----------|-----------------------------------------------------------------------------------------------|
| Otu1082 | 0        | 19      | 2       | 0       | 8       | 3       | 0        | 0        | 0        | 0        | 3        | 0        | Bacteria; Chloroflexi; Anaerolineae; CFB-26                                                   |
| Otu1083 | 0        | 0       | 1       | 0       | 0       | 4       | 3        | 4        | 1        | 5        | 0        | 7        | Bacteria; Planctomycetes; Phycisphaerae; WD2101                                               |
| Otu1080 | 9        | 4       | 2       | 11      | 7       | 1       | 2        | 0        | 1        | 0        | 0        | 2        | Bacteria; Proteobacteria; Gammaproteobacteria; Legionellales; Coxiellaceae; Aquicella         |
| Otu1081 | 2        | 1       | 1       | 8       | 0       | 8       | 5        | 8        | 9        | 3        | 3        | 3        | Bacteria; Elusimicrobia; Elusimicrobia; MVP-88                                                |
| Otu2440 | 0        | 3       | 0       | 0       | 0       | 1       | 0        | 0        | 1        | 2        | 1        | 0        | Bacteria; Proteobacteria; Gammaproteobacteria; Legionellales                                  |
| Otu1088 | 0        | 0       | 0       | 0       | 0       | 1       | 0        | 0        | 0        | 3        | 0        | 6        | Bacteria; TM6; SBRH58                                                                         |
| Otu1089 | 2        | 4       | 0       | 3       | 1       | 1       | 7        | 0        | 4        | 6        | 3        | 1        | Bacteria; Acidobacteria; Chloracidobacteria; PK29                                             |
| Otu2479 | 3        | 1       | 2       | 6       | 0       | 1       | 7        | 3        | 0        | 1        | 2        | 0        | Bacteria; Proteobacteria; Alphaproteobacteria; Rickettsiales                                  |
| Otu589  | 9        | 8       | 17      | 17      | 11      | 10      | 45       | 7        | 18       | 7        | 21       | 6        | Bacteria; Actinobacteria; Actinobacteria; Actinomycetales; Frankiaceae                        |
| Otu588  | 0        | 0       | 2       | 11      | 2       | 2       | 5        | 0        | 1        | 0        | 25       | 2        | Bacteria; Actinobacteria; Thermoleophilia; Solirubacteriales; Patulibacteraceae; Patulibacter |
| Otu2702 | 0        | 0       | 0       | 0       | 0       | 0       | 2        | 0        | 0        | 0        | 0        | 0        | Bacteria; Firmicutes; Clostridia; Clostridiales                                               |
| Otu2703 | 2        | 2       | 2       | 1       | 0       | 2       | 0        | 1        | 4        | 0        | 1        | 1        | Bacteria; Bacteroidetes; Sphingobacteriia; Sphingobacteriales                                 |
| Otu2704 | 0        | 0       | 1       | 2       | 0       | 0       | 0        | 1        | 1        | 0        | 3        | 0        | Bacteria; Proteobacteria; Gammaproteobacteria; Legionellales                                  |
| Otu2705 | 3        | 2       | 1       | 1       | 2       | 0       | 0        | 1        | 0        | 1        | 1        | 0        | Bacteria; Bacteroidetes; Saprospirae; Saprospirales; Chitinophagaceae; Flavisolibacter        |
| Otu2706 | 0        | 0       | 2       | 1       | 0       | 0       | 0        | 0        | 0        | 0        | 0        | 0        | Bacteria; Proteobacteria; Deltaproteobacteria                                                 |
| Otu2707 | 6        | 1       | 5       | 6       | 1       | 4       | 6        | 2        | 5        | 4        | 8        | 7        | Bacteria; Acidobacteria; Solibacteres; Solibacteriales                                        |
| Otu581  | 3        | 0       | 11      | 12      | 4       | 6       | 14       | 2        | 7        | 7        | 12       | 2        | Bacteria; Proteobacteria; Gammaproteobacteria; Legionellales                                  |
| Otu580  | 4        | 19      | 15      | 10      | 27      | 6       | 8        | 5        | 10       | 3        | 28       | 2        | Bacteria; Chloroflexi; Anaerolineae; GCA004                                                   |
| Otu583  | 9        | 28      | 37      | 30      | 17      | 20      | 35       | 18       | 32       | 22       | 40       | 20       | Bacteria; Proteobacteria; Deltaproteobacteria; Myxococcales; Polyangiaceae                    |
| Otu582  | 0        | 0       | 0       | 0       | 0       | 0       | 0        | 0        | 0        | 16       | 0        | 0        | Bacteria; Bacteroidetes; Flavobacteriia; Flavobacteriales; Weeksellaceae                      |
| Otu585  | 4        | 3       | 2       | 11      | 4       | 2       | 7        | 6        | 21       | 19       | 12       | 5        | Bacteria; Bacteroidetes; Sphingobacteriia; Sphingobacteriales                                 |
| Otu584  | 14       | 5       | 5       | 5       | 7       | 3       | 6        | 2        | 3        | 7        | 22       | 3        | Bacteria; Proteobacteria; Alphaproteobacteria; Rhodospirillales; Rhodospirillaceae            |

| #OTU ID | Z31DSO1r | Z31DSO2 | Z31DSO3 | Z31DSO4 | Z31DSO5 | Z31DSO6 | Z31JDSO1 | Z31JDSO2 | Z31JDSO3 | Z31JDSO4 | Z31JDSO5 | Z31JDSO6 | taxonomy                                                                                      |
|---------|----------|---------|---------|---------|---------|---------|----------|----------|----------|----------|----------|----------|-----------------------------------------------------------------------------------------------|
| Otu587  | 9        | 6       | 17      | 3       | 1       | 20      | 16       | 3        | 7        | 7        | 3        | 4        | Bacteria; Proteobacteria; Betaproteobacteria; Burkholderiales; Alcaligenaceae; Achromobacter  |
| Otu586  | 39       | 20      | 11      | 27      | 18      | 7       | 22       | 30       | 22       | 38       | 22       | 23       | Bacteria; Proteobacteria; Alphaproteobacteria                                                 |
| Otu1172 | 1        | 0       | 0       | 0       | 1       | 0       | 0        | 0        | 2        | 0        | 8        | 0        | Bacteria; Proteobacteria; Betaproteobacteria; Procabacteriales; Procabacteriaceae             |
| Otu1173 | 9        | 0       | 2       | 0       | 1       | 0       | 3        | 0        | 1        | 0        | 0        | 0        | Bacteria; Chloroflexi; Thermomicrobia; JG30-KF-CM45                                           |
| Otu1170 | 2        | 1       | 0       | 0       | 2       | 8       | 4        | 5        | 3        | 1        | 10       | 2        | Bacteria; TM7; SC3                                                                            |
| Otu458  | 71       | 59      | 41      | 33      | 36      | 42      | 75       | 31       | 47       | 32       | 63       | 26       | Bacteria; Proteobacteria; Alphaproteobacteria; Rhizobiales; Hyphomicrobiaceae; Rhodoplanes    |
| Otu1176 | 12       | 2       | 4       | 7       | 1       | 0       | 8        | 5        | 6        | 8        | 8        | 0        | Bacteria; Proteobacteria; Alphaproteobacteria; Rhodospirillales; Rhodospirillaceae            |
| Otu1177 | 42       | 6       | 9       | 13      | 9       | 10      | 10       | 11       | 11       | 17       | 19       | 8        | Bacteria; Armatimonadetes; Chthonomonadetes; Chthonomonadales; Chthonomonadaceae              |
| Otu1174 | 1        | 2       | 2       | 2       | 2       | 1       | 3        | 1        | 1        | 1        | 10       | 1        | Bacteria; Acidobacteria; Solibacteres; Solibacterales; Solibacteraceae; Candidatus_Solibacter |
| Otu1175 | 31       | 11      | 6       | 4       | 4       | 2       | 8        | 3        | 0        | 4        | 16       | 2        | Bacteria; Acidobacteria; Chloracidobacteria; DS-100                                           |
| Otu453  | 4        | 0       | 7       | 22      | 0       | 0       | 0        | 0        | 0        | 0        | 0        | 0        | Bacteria; Proteobacteria                                                                      |
| Otu452  | 21       | 3       | 0       | 0       | 1       | 0       | 0        | 0        | 0        | 1        | 2        | 0        | Bacteria; Gemmatimonadetes; Gemm-3                                                            |
| Otu451  | 0        | 0       | 0       | 4       | 0       | 24      | 1        | 0        | 0        | 2        | 1        | 6        | Bacteria; Cyanobacteria                                                                       |
| Otu450  | 14       | 4       | 8       | 15      | 11      | 12      | 4        | 9        | 13       | 9        | 29       | 14       | Bacteria; Proteobacteria; Gammaproteobacteria; Xanthomonadales; Xanthomonadaceae              |
| Otu457  | 20       | 9       | 7       | 23      | 11      | 12      | 18       | 10       | 29       | 12       | 15       | 6        | Bacteria; Gemmatimonadetes; Gemmatimonadetes; Gemmatimonadales                                |
| Otu456  | 32       | 21      | 9       | 13      | 6       | 3       | 2        | 2        | 4        | 8        | 4        | 8        | Bacteria; Proteobacteria; Gammaproteobacteria; Thiotrichales; Piscirickettsiaceae             |
| Otu455  | 16       | 20      | 18      | 18      | 7       | 14      | 33       | 21       | 25       | 12       | 29       | 4        | Bacteria; Actinobacteria; Thermoleophilia; Solirubrobacterales                                |
| Otu454  | 18       | 28      | 4       | 30      | 1       | 0       | 5        | 6        | 8        | 28       | 6        | 3        | Bacteria; Bacteroidetes; Saprospirae; Saprospirales; Chitinophagaceae; Flavihumibacter        |
| Otu1374 | 2        | 2       | 0       | 1       | 0       | 2       | 7        | 0        | 0        | 0        | 1        | 1        | Bacteria; Armatimonadetes; Armatimonadia; Armatimonadales; Armatimonadaceae                   |
| Otu1375 | 15       | 7       | 8       | 1       | 3       | 5       | 0        | 2        | 1        | 2        | 3        | 6        | Bacteria; Planctomycetes; Phycisphaerae; WD2101                                               |
| Otu1376 | 0        | 4       | 6       | 2       | 3       | 0       | 14       | 4        | 2        | 0        | 0        | 1        | Bacteria; Firmicutes; Bacilli; Bacillales; Paenibacillaceae; Paenibacillus                    |
| Otu1377 | 4        | 1       | 0       | 9       | 0       | 2       | 1        | 0        | 1        | 2        | 1        | 1        | Bacteria; Bacteroidetes; Cytophagia; Cytophagales; Cytophagaceae; Sporocytophaga              |

| #OTU ID | Z31DSO1r | Z31DSO2 | Z31DSO3 | Z31DSO4 | Z31DSO5 | Z31DSO6 | Z31J1DSO1 | Z31J1DSO2 | Z31J1DSO3 | Z31J1DSO4 | Z31J1DSO5 | Z31J1DSO6 | taxonomy                                                                                 |
|---------|----------|---------|---------|---------|---------|---------|-----------|-----------|-----------|-----------|-----------|-----------|------------------------------------------------------------------------------------------|
| Otu1370 | 5        | 2       | 12      | 20      | 13      | 6       | 9         | 4         | 12        | 14        | 8         | 1         | Bacteria; Proteobacteria; Gammaproteobacteria; Legionellales; Coxiellaceae               |
| Otu1371 | 14       | 15      | 2       | 3       | 8       | 0       | 4         | 2         | 0         | 1         | 5         | 3         | Bacteria; Nitrospirae; Nitrospira; Nitrospirales; 0319-6A21                              |
| Otu1372 | 4        | 3       | 4       | 7       | 0       | 4       | 7         | 5         | 6         | 7         | 10        | 15        | Bacteria; Gemmatimonadetes; Gemmatimonadetes; Ellin5290                                  |
| Otu1373 | 4        | 6       | 3       | 4       | 3       | 3       | 4         | 0         | 0         | 5         | 9         | 0         | Bacteria; Acidobacteria; Acidobacteria-6; CCU21                                          |
| Otu1378 | 5        | 3       | 4       | 0       | 1       | 0       | 1         | 1         | 2         | 0         | 7         | 2         | Bacteria; Planctomycetes; Planctomycetia; Pirellulales; Pirellulaceae                    |
| Otu1379 | 0        | 0       | 0       | 0       | 0       | 3       | 1         | 7         | 7         | 0         | 0         | 2         | Bacteria; Gemmatimonadetes; Gemm-1                                                       |
| Otu1853 | 2        | 4       | 0       | 3       | 0       | 3       | 6         | 4         | 5         | 5         | 3         | 3         | Bacteria; Proteobacteria; Alphaproteobacteria; Caulobacterales; Caulobacteraceae         |
| Otu459  | 43       | 65      | 94      | 98      | 100     | 116     | 61        | 74        | 41        | 32        | 96        | 18        | Bacteria; Chloroflexi; Anaerolineae; SBR1031; A4b                                        |
| Otu1171 | 2        | 0       | 0       | 8       | 3       | 0       | 1         | 0         | 0         | 1         | 1         | 0         | Bacteria                                                                                 |
| Otu2638 | 2        | 1       | 2       | 2       | 2       | 2       | 2         | 1         | 0         | 0         | 2         | 0         | Bacteria; Planctomycetes; Planctomycetia; Gemmatales; Gemmataceae                        |
| Otu2639 | 2        | 1       | 2       | 0       | 1       | 0       | 1         | 0         | 1         | 0         | 1         | 0         | Bacteria; Actinobacteria; Acidimicrobia; Acidimicrobiales                                |
| Otu2634 | 2        | 0       | 0       | 0       | 0       | 0       | 0         | 0         | 0         | 1         | 0         | 1         | Bacteria; TM7; TM7-1                                                                     |
| Otu2635 | 3        | 0       | 2       | 1       | 0       | 0       | 1         | 5         | 2         | 1         | 0         | 1         | Bacteria; Proteobacteria; Alphaproteobacteria; Rhodospirillales; Rhodospirillaceae       |
| Otu2636 | 0        | 0       | 0       | 0       | 0       | 0       | 0         | 1         | 0         | 2         | 0         | 0         | Bacteria; Actinobacteria; Acidimicrobia; Acidimicrobiales                                |
| Otu2637 | 0        | 0       | 0       | 0       | 4       | 0       | 0         | 3         | 0         | 0         | 1         | 0         | Bacteria; Tenericutes; Mollicutes; Anaeroplasmatales; Anaeroplasmataceae; Asteroleplasma |
| Otu2630 | 0        | 0       | 2       | 0       | 1       | 2       | 0         | 1         | 0         | 0         | 2         | 0         | Bacteria; Bacteroidetes; Cytophagia; Cytophagales; Cytophagaceae                         |
| Otu2631 | 0        | 2       | 1       | 4       | 0       | 0       | 2         | 1         | 3         | 2         | 1         | 0         | Bacteria; Chlamydiae; Chlamydia; Chlamydiales                                            |
| Otu2632 | 0        | 2       | 0       | 1       | 0       | 3       | 1         | 1         | 1         | 0         | 2         | 0         | Bacteria; Proteobacteria; Alphaproteobacteria; Rickettsiales; mitochondria               |
| Otu2633 | 2        | 0       | 1       | 0       | 0       | 0       | 0         | 0         | 0         | 0         | 0         | 0         | Bacteria; Proteobacteria; Gammaproteobacteria; Legionellales; Coxiellaceae; Aquicella    |
| Otu1529 | 1        | 3       | 1       | 8       | 4       | 3       | 1         | 1         | 2         | 8         | 1         | 2         | Bacteria; Planctomycetes; vadinHA49; DH61                                                |
| Otu1178 | 13       | 1       | 2       | 9       | 2       | 1       | 4         | 2         | 6         | 3         | 5         | 3         | Bacteria; Proteobacteria; Alphaproteobacteria; Rhodospirillales; Rhodospirillaceae       |
| Otu1528 | 0        | 4       | 0       | 1       | 0       | 0       | 1         | 0         | 0         | 0         | 0         | 1         | Bacteria; Acidobacteria; Acidobacteria-6; iii1-15; RB40                                  |



| #OTU ID | Z31DSO1r | Z31DSO2 | Z31DSO3 | Z31DSO4 | Z31DSO5 | Z31DSO6 | Z31JDSO1 | Z31JDSO2 | Z31JDSO3 | Z31JDSO4 | Z31JDSO5 | Z31JDSO6 | taxonomy                                                                                     |
|---------|----------|---------|---------|---------|---------|---------|----------|----------|----------|----------|----------|----------|----------------------------------------------------------------------------------------------|
| Otu1179 | 6        | 1       | 7       | 0       | 3       | 3       | 1        | 2        | 1        | 3        | 5        | 1        | Bacteria                                                                                     |
| Otu129  | 40       | 53      | 47      | 49      | 51      | 36      | 70       | 82       | 46       | 83       | 88       | 32       | Bacteria; Proteobacteria; Deltaproteobacteria; Myxococcales; Myxococcaceae                   |
| Otu128  | 26       | 24      | 14      | 59      | 20      | 36      | 41       | 155      | 170      | 28       | 16       | 29       | Bacteria; Bacteroidetes; Cytophagia; Cytophagales; Cytophagaceae                             |
| Otu127  | 2        | 26      | 16      | 96      | 44      | 3       | 9        | 11       | 28       | 28       | 45       | 5        | Bacteria; Chlamydiae; Chlamydia; Chlamydiales                                                |
| Otu126  | 3        | 0       | 4       | 3       | 1       | 86      | 4        | 35       | 28       | 12       | 0        | 19       | Bacteria; Acidobacteria; DA052; Ellin6513                                                    |
| Otu125  | 40       | 44      | 54      | 89      | 70      | 86      | 59       | 44       | 67       | 46       | 97       | 27       | Bacteria; Chloroflexi; Anaerolineae; WCHB1-50                                                |
| Otu124  | 113      | 11      | 57      | 67      | 28      | 150     | 3        | 6        | 25       | 18       | 68       | 8        | Bacteria; Verrucomicrobia; Pedosphaerae; Pedosphaerales; Ellin515                            |
| Otu123  | 57       | 31      | 36      | 24      | 20      | 23      | 112      | 25       | 35       | 15       | 69       | 19       | Bacteria; Proteobacteria; Deltaproteobacteria; Myxococcales; Myxococcaceae                   |
| Otu122  | 120      | 60      | 75      | 73      | 32      | 67      | 90       | 62       | 98       | 58       | 75       | 90       | Bacteria; Acidobacteria; Solibacteres; Solibacterales                                        |
| Otu121  | 0        | 3       | 11      | 3       | 2       | 3       | 10       | 27       | 7        | 9        | 3        | 96       | Bacteria; Firmicutes; Bacilli; Bacillales; Paenibacillaceae; Paenibacillus                   |
| Otu120  | 72       | 68      | 60      | 123     | 37      | 62      | 116      | 52       | 76       | 85       | 66       | 76       | Bacteria; Proteobacteria; Betaproteobacteria; Burkholderiales; Oxalobacteraceae              |
| Otu909  | 8        | 5       | 14      | 10      | 5       | 8       | 31       | 13       | 7        | 12       | 13       | 9        | Bacteria; Actinobacteria; Actinobacteria; Actinomycetales; Microbacteriaceae; Cryocolla      |
| Otu908  | 0        | 2       | 3       | 11      | 1       | 1       | 3        | 1        | 4        | 5        | 0        | 11       | Bacteria; Proteobacteria; Gammaproteobacteria; Legionellales                                 |
| Otu905  | 16       | 15      | 8       | 8       | 13      | 7       | 17       | 2        | 0        | 11       | 7        | 11       | Bacteria; Gemmatimonadetes; Gemmatimonadetes                                                 |
| Otu904  | 2        | 4       | 2       | 16      | 2       | 8       | 5        | 15       | 16       | 4        | 4        | 4        | Bacteria; Verrucomicrobia; Pedosphaerae; Pedosphaerales                                      |
| Otu907  | 7        | 1       | 7       | 9       | 5       | 7       | 11       | 3        | 8        | 11       | 6        | 1        | Bacteria; Proteobacteria; Deltaproteobacteria; Myxococcales                                  |
| Otu906  | 0        | 1       | 10      | 2       | 0       | 0       | 0        | 0        | 0        | 0        | 0        | 0        | Bacteria; Bacteroidetes; Saprospirae; Saprospirales; Chitinophagaceae                        |
| Otu901  | 2        | 0       | 7       | 1       | 0       | 9       | 3        | 1        | 0        | 15       | 0        | 0        | Bacteria; Bacteroidetes; Flavobacteriia; Flavobacteriales; Flavobacteriaceae; Flavobacterium |
| Otu900  | 16       | 4       | 1       | 5       | 1       | 2       | 8        | 1        | 1        | 2        | 11       | 0        | Bacteria; TM7; SC3                                                                           |
| Otu903  | 2        | 15      | 0       | 1       | 2       | 0       | 0        | 0        | 0        | 0        | 0        | 0        | Bacteria; Verrucomicrobia; Pedosphaerae; Pedosphaerales                                      |
| Otu902  | 5        | 1       | 4       | 7       | 3       | 6       | 10       | 5        | 4        | 4        | 12       | 5        | Bacteria; Actinobacteria; Thermoleophilia; Gaiellales                                        |
| Otu2528 | 3        | 0       | 0       | 0       | 1       | 1       | 1        | 0        | 0        | 0        | 0        | 0        | Bacteria; Bacteroidetes; Cytophagia; Cytophagales; Cytophagaceae; Sporocytophaga             |

| #OTU ID | Z31DSO1r | Z31DSO2 | Z31DSO3 | Z31DSO4 | Z31DSO5 | Z31DSO6 | Z31JDSO1 | Z31JDSO2 | Z31JDSO3 | Z31JDSO4 | Z31JDSO5 | Z31JDSO6 | taxonomy                                                                                           |
|---------|----------|---------|---------|---------|---------|---------|----------|----------|----------|----------|----------|----------|----------------------------------------------------------------------------------------------------|
| Otu2529 | 0        | 0       | 0       | 0       | 0       | 0       | 0        | 1        | 1        | 0        | 2        | 0        | Bacteria; Proteobacteria; Deltaproteobacteria; Bdellovibrionales; Bdellovibrionaceae; Bdellovibrio |
| Otu3033 | 0        | 0       | 0       | 0       | 0       | 0       | 0        | 2        | 1        | 2        | 0        | 0        | Bacteria                                                                                           |
| Otu1526 | 0        | 0       | 0       | 0       | 0       | 1       | 0        | 1        | 5        | 0        | 0        | 0        | Bacteria; Proteobacteria                                                                           |
| Otu3035 | 28       | 2       | 4       | 18      | 8       | 24      | 10       | 17       | 16       | 15       | 14       | 8        | Bacteria; Proteobacteria; Deltaproteobacteria; Myxococcales                                        |
| Otu3034 | 2        | 0       | 0       | 0       | 0       | 0       | 0        | 0        | 0        | 0        | 0        | 0        | Bacteria; Planctomycetes; Phycisphaerae; WD2101                                                    |
| Otu3037 | 2        | 0       | 0       | 0       | 0       | 0       | 0        | 0        | 0        | 0        | 0        | 0        | Bacteria; Proteobacteria; Deltaproteobacteria; Myxococcales                                        |
| Otu3036 | 3        | 0       | 0       | 0       | 0       | 0       | 0        | 0        | 0        | 0        | 0        | 0        | Bacteria; Actinobacteria; Actinobacteria; Actinomycetales; Micromonosporaceae                      |
| Otu2520 | 0        | 0       | 0       | 3       | 0       | 0       | 0        | 0        | 0        | 0        | 1        | 0        | Bacteria; Proteobacteria; Gammaproteobacteria                                                      |
| Otu2521 | 12       | 6       | 11      | 10      | 5       | 15      | 23       | 14       | 14       | 7        | 13       | 12       | Bacteria; Proteobacteria; Alphaproteobacteria; Rhizobiales                                         |
| Otu2522 | 0        | 2       | 0       | 0       | 0       | 0       | 0        | 0        | 1        | 0        | 0        | 0        | Bacteria; Proteobacteria; Deltaproteobacteria; Syntrophobacterales; Syntrophobacteraceae           |
| Otu2449 | 2        | 1       | 1       | 2       | 2       | 0       | 0        | 0        | 0        | 0        | 1        | 0        | Bacteria; Proteobacteria; Deltaproteobacteria; Myxococcales                                        |
| Otu2524 | 3        | 0       | 0       | 0       | 0       | 0       | 0        | 0        | 0        | 1        | 1        | 0        | Bacteria                                                                                           |
| Otu2525 | 0        | 0       | 0       | 0       | 0       | 0       | 2        | 0        | 0        | 0        | 0        | 0        | Bacteria; Firmicutes; Clostridia; Clostridiales                                                    |
| Otu2526 | 2        | 2       | 0       | 0       | 0       | 0       | 0        | 0        | 1        | 1        | 0        | 0        | Bacteria                                                                                           |
| Otu2527 | 7        | 2       | 8       | 10      | 4       | 2       | 6        | 3        | 8        | 2        | 16       | 3        | Bacteria; Verrucomicrobia; Pedosphaerae; Pedosphaerales; Ellin515                                  |
| Otu633  | 2        | 14      | 4       | 1       | 4       | 0       | 1        | 0        | 1        | 0        | 5        | 0        | Bacteria; Verrucomicrobia; Pedosphaerae; Pedosphaerales; Ellin515                                  |
| Otu632  | 6        | 13      | 15      | 3       | 6       | 11      | 2        | 0        | 0        | 1        | 8        | 2        | Bacteria; Chloroflexi; Anaerolineae; GCA004                                                        |
| Otu631  | 0        | 0       | 0       | 2       | 0       | 3       | 0        | 0        | 16       | 3        | 5        | 2        | Bacteria; Proteobacteria; Gammaproteobacteria; Legionellales                                       |
| Otu630  | 5        | 4       | 3       | 10      | 1       | 5       | 11       | 9        | 13       | 9        | 11       | 14       | Bacteria; Gemmatimonadetes; Gemmatimonadetes; Ellin5290                                            |
| Otu637  | 0        | 0       | 1       | 8       | 0       | 4       | 0        | 15       | 6        | 0        | 0        | 0        | Bacteria; Proteobacteria; Gammaproteobacteria; Legionellales                                       |
| Otu636  | 0        | 0       | 0       | 2       | 8       | 3       | 3        | 4        | 7        | 0        | 3        | 22       | Bacteria; Acidobacteria; Holophagae; Holophagales; Holophagaceae                                   |
| Otu635  | 0        | 4       | 7       | 17      | 3       | 25      | 11       | 11       | 15       | 9        | 11       | 18       | Bacteria; Actinobacteria; Actinobacteria; Actinomycetales                                          |



| #OTU ID | Z31DSO1r | Z31DSO2 | Z31DSO3 | Z31DSO4 | Z31DSO5 | Z31DSO6 | Z31J1DSO1 | Z31J1DSO2 | Z31J1DSO3 | Z31J1DSO4 | Z31J1DSO5 | Z31J1DSO6 | taxonomy                                                                                                       |
|---------|----------|---------|---------|---------|---------|---------|-----------|-----------|-----------|-----------|-----------|-----------|----------------------------------------------------------------------------------------------------------------|
| Otu3151 | 2        | 0       | 1       | 0       | 0       | 0       | 0         | 0         | 0         | 0         | 1         | 0         | Bacteria; Bacteroidetes; Saprospirae; Saprospirales; Chitinophagaceae                                          |
| Otu3158 | 0        | 0       | 0       | 0       | 0       | 0       | 1         | 0         | 1         | 2         | 0         | 1         | Bacteria                                                                                                       |
| Otu3159 | 0        | 0       | 1       | 1       | 2       | 0       | 0         | 3         | 2         | 2         | 0         | 2         | Bacteria; Proteobacteria; Alphaproteobacteria; Rickettsiales; mitochondria                                     |
| Otu839  | 20       | 3       | 7       | 12      | 7       | 7       | 6         | 6         | 8         | 21        | 7         | 6         | Bacteria; Acidobacteria; Solibacteres; Solibacterales                                                          |
| Otu838  | 25       | 9       | 3       | 8       | 2       | 1       | 2         | 2         | 1         | 1         | 2         | 0         | Bacteria; Proteobacteria; Betaproteobacteria; SC-I-84                                                          |
| Otu2456 | 0        | 1       | 0       | 0       | 0       | 0       | 0         | 0         | 0         | 0         | 2         | 0         | Bacteria; TM6; SBRH58                                                                                          |
| Otu2457 | 2        | 0       | 3       | 1       | 2       | 1       | 0         | 0         | 0         | 0         | 0         | 1         | Bacteria; Proteobacteria; Deltaproteobacteria; Myxococcales; Haliangiaceae                                     |
| Otu2450 | 1        | 1       | 1       | 5       | 2       | 1       | 2         | 0         | 0         | 0         | 3         | 1         | Bacteria; Nitrospirae; Nitrospira; Nitrospirales; FW; 4-29                                                     |
| Otu2451 | 0        | 0       | 1       | 0       | 3       | 0       | 0         | 0         | 0         | 0         | 0         | 0         | Bacteria; Verrucomicrobia; Pedosphaerae; Pedosphaerales                                                        |
| Otu2452 | 0        | 0       | 1       | 4       | 0       | 0       | 1         | 0         | 0         | 1         | 2         | 1         | Bacteria; Proteobacteria; Gammaproteobacteria; Legionellales                                                   |
| Otu2453 | 0        | 0       | 2       | 0       | 1       | 0       | 3         | 0         | 1         | 0         | 0         | 0         | Bacteria; Firmicutes; Clostridia; Clostridiales; Peptococcaceae; Desulfosporosinus; Desulfosporosinus_meridiei |
| Otu831  | 0        | 0       | 2       | 1       | 2       | 1       | 0         | 1         | 4         | 3         | 0         | 15        | Bacteria; Bacteroidetes; Cytophagia; Cytophagales; Cytophagaceae; Cytophaga                                    |
| Otu830  | 8        | 4       | 1       | 12      | 5       | 8       | 8         | 12        | 27        | 21        | 5         | 16        | Bacteria; Proteobacteria; Gammaproteobacteria                                                                  |
| Otu833  | 0        | 1       | 2       | 2       | 7       | 13      | 0         | 0         | 4         | 2         | 3         | 4         | Bacteria; Chloroflexi; Anaerolineae; CFB-26                                                                    |
| Otu832  | 15       | 7       | 3       | 1       | 7       | 0       | 3         | 1         | 2         | 5         | 12        | 1         | Bacteria; Gemmatimonadetes; Gemmatimonadetes; Ellin5290                                                        |
| Otu835  | 21       | 27      | 15      | 30      | 21      | 4       | 18        | 4         | 18        | 11        | 20        | 14        | Bacteria; Bacteroidetes; Saprospirae; Saprospirales; Chitinophagaceae                                          |
| Otu834  | 29       | 28      | 26      | 26      | 20      | 34      | 21        | 21        | 17        | 37        | 32        | 20        | Bacteria; Planctomycetes; Phycisphaerae; WD2101                                                                |
| Otu837  | 10       | 3       | 3       | 0       | 2       | 0       | 1         | 0         | 0         | 2         | 1         | 0         | Bacteria; Proteobacteria; Deltaproteobacteria; Myxococcales                                                    |
| Otu836  | 12       | 3       | 6       | 30      | 9       | 9       | 12        | 6         | 17        | 25        | 20        | 2         | Bacteria; Proteobacteria; Gammaproteobacteria; Legionellales; Coxiellaceae                                     |
| Otu3340 | 0        | 0       | 0       | 0       | 0       | 0       | 0         | 0         | 0         | 0         | 3         | 0         | Bacteria; Chloroflexi; Anaerolineae                                                                            |
| Otu3252 | 5        | 2       | 1       | 7       | 2       | 10      | 15        | 3         | 6         | 3         | 19        | 8         | Bacteria; Actinobacteria; Thermoleophilia; Solirubrobacterales                                                 |
| Otu3346 | 0        | 0       | 0       | 0       | 1       | 0       | 0         | 0         | 0         | 0         | 2         | 0         | Bacteria; Proteobacteria; Gammaproteobacteria                                                                  |

| #OTU ID | Z31DSO1r | Z31DSO2 | Z31DSO3 | Z31DSO4 | Z31DSO5 | Z31DSO6 | Z31J1DSO1 | Z31J1DSO2 | Z31J1DSO3 | Z31J1DSO4 | Z31J1DSO5 | Z31J1DSO6 | taxonomy                                                                                      |
|---------|----------|---------|---------|---------|---------|---------|-----------|-----------|-----------|-----------|-----------|-----------|-----------------------------------------------------------------------------------------------|
| Otu3345 | 2        | 0       | 0       | 0       | 0       | 4       | 0         | 0         | 0         | 1         | 0         | 0         | Bacteria                                                                                      |
| Otu3355 | 1        | 4       | 1       | 2       | 0       | 1       | 0         | 3         | 4         | 1         | 3         | 0         | Bacteria; Proteobacteria; Betaproteobacteria; Burkholderiales; Comamonadaceae                 |
| Otu2663 | 0        | 1       | 3       | 0       | 1       | 0       | 0         | 0         | 0         | 0         | 3         | 0         | Bacteria; Proteobacteria; Deltaproteobacteria; Myxococcales                                   |
| Otu2212 | 4        | 0       | 0       | 0       | 0       | 0       | 0         | 0         | 0         | 0         | 0         | 0         | Bacteria; Chloroflexi                                                                         |
| Otu2213 | 0        | 0       | 3       | 0       | 0       | 0       | 0         | 0         | 0         | 0         | 0         | 0         | Bacteria; Proteobacteria; Alphaproteobacteria; Rhizobiales; Methylocystaceae; Pleomorphomonas |
| Otu2210 | 4        | 2       | 0       | 1       | 2       | 2       | 1         | 1         | 2         | 0         | 6         | 4         | Bacteria; Actinobacteria; Acidimicrobia; Acidimicrobiales                                     |
| Otu2211 | 0        | 0       | 0       | 0       | 0       | 0       | 0         | 0         | 0         | 0         | 3         | 0         | Bacteria; Bacteroidetes; Saprospirae; Saprospirales; Chitinophagaceae; Flavisolibacter        |
| Otu1888 | 9        | 16      | 15      | 7       | 8       | 10      | 19        | 7         | 8         | 2         | 24        | 8         | Bacteria; Actinobacteria; Thermoleophilia; Solirubrobacterales                                |
| Otu1889 | 0        | 0       | 1       | 2       | 2       | 0       | 0         | 0         | 1         | 0         | 4         | 0         | Bacteria; Tenericutes; Mollicutes; Anaeroplasmatales; Anaeroplasmataceae; Asteroleplasma      |
| Otu1886 | 3        | 3       | 0       | 1       | 0       | 0       | 1         | 0         | 0         | 2         | 2         | 0         | Bacteria; Armatimonadetes; Chthonomonadetes; SJA-22                                           |
| Otu1887 | 3        | 1       | 2       | 0       | 0       | 0       | 1         | 0         | 0         | 0         | 1         | 0         | Bacteria; Chloroflexi; Chloroflexi; Roseiflexales                                             |
| Otu1884 | 1        | 0       | 0       | 3       | 0       | 1       | 0         | 0         | 0         | 1         | 0         | 0         | Bacteria; Planctomycetes; vadinHA49; DH61                                                     |
| Otu1885 | 0        | 1       | 0       | 2       | 0       | 1       | 0         | 1         | 1         | 6         | 1         | 0         | Bacteria; Proteobacteria; Betaproteobacteria; Neisseriales; Neisseriaceae                     |
| Otu1882 | 4        | 3       | 2       | 1       | 2       | 1       | 4         | 1         | 3         | 4         | 4         | 2         | Bacteria; Actinobacteria; Thermoleophilia; Gaiellales                                         |
| Otu1883 | 8        | 4       | 8       | 5       | 2       | 4       | 6         | 7         | 17        | 2         | 3         | 8         | Bacteria; TM7; TM7-1                                                                          |
| Otu1880 | 0        | 1       | 1       | 0       | 1       | 1       | 0         | 0         | 5         | 0         | 0         | 0         | Bacteria; Firmicutes; Bacilli; Bacillales; Staphylococcaceae; Staphylococcus                  |
| Otu1881 | 3        | 0       | 0       | 0       | 0       | 0       | 0         | 0         | 0         | 0         | 0         | 0         | Bacteria; OD1; ZB2                                                                            |
| Otu732  | 3        | 16      | 3       | 3       | 4       | 1       | 3         | 1         | 1         | 5         | 4         | 1         | Bacteria; Chloroflexi; Anaerolineae; S0208                                                    |
| Otu2214 | 0        | 0       | 0       | 2       | 1       | 0       | 1         | 0         | 0         | 4         | 0         | 0         | Bacteria; Chloroflexi; Anaerolineae; SBR1031; oc28                                            |
| Otu733  | 14       | 4       | 6       | 1       | 0       | 1       | 0         | 0         | 0         | 0         | 2         | 3         | Bacteria; Proteobacteria; Gammaproteobacteria; Pseudomonadales; Pseudomonadaceae              |
| Otu2215 | 1        | 0       | 4       | 3       | 1       | 1       | 2         | 3         | 3         | 1         | 1         | 1         | Bacteria; Chlamydiae; Chlamydiai; Chlamydiales; Rhabdochlamydiae; Candidatus_Rhabdochlamydia  |
| Otu730  | 53       | 15      | 21      | 60      | 20      | 22      | 32        | 21        | 37        | 47        | 33        | 20        | Bacteria; Planctomycetes; Phycisphaerae; WD2101                                               |

| #OTU ID | Z31DSO1r | Z31DSO2 | Z31DSO3 | Z31DSO4 | Z31DSO5 | Z31DSO6 | Z31J1DSO1 | Z31J1DSO2 | Z31J1DSO3 | Z31J1DSO4 | Z31J1DSO5 | Z31J1DSO6 | taxonomy                                                                                             |
|---------|----------|---------|---------|---------|---------|---------|-----------|-----------|-----------|-----------|-----------|-----------|------------------------------------------------------------------------------------------------------|
| Otu3185 | 2        | 0       | 0       | 0       | 0       | 0       | 0         | 0         | 0         | 0         | 0         | 0         | Bacteria; Chloroflexi; Chloroflexi; Roseiflexales                                                    |
| Otu731  | 1        | 4       | 3       | 15      | 5       | 6       | 0         | 0         | 3         | 1         | 15        | 3         | Bacteria                                                                                             |
| Otu3184 | 0        | 0       | 1       | 1       | 1       | 3       | 0         | 0         | 0         | 0         | 0         | 0         | Bacteria; Chlamydiae; Chlamydia; Chlamydiales                                                        |
| Otu736  | 7        | 16      | 16      | 11      | 2       | 2       | 7         | 7         | 4         | 3         | 4         | 7         | Bacteria; Planctomycetes; Phycisphaerae; WD2101                                                      |
| Otu3187 | 0        | 0       | 2       | 0       | 1       | 0       | 0         | 0         | 0         | 0         | 1         | 0         | Bacteria; TM6                                                                                        |
| Otu3123 | 0        | 0       | 1       | 2       | 0       | 0       | 1         | 0         | 1         | 0         | 2         | 0         | Bacteria; Proteobacteria; Gammaproteobacteria; Legionellales                                         |
| Otu737  | 11       | 4       | 0       | 2       | 1       | 0       | 0         | 1         | 2         | 1         | 2         | 0         | Bacteria; Bacteroidetes; Saprospirae; Saprospirales; Chitinophagaceae                                |
| Otu2043 | 1        | 0       | 0       | 2       | 0       | 0       | 0         | 3         | 0         | 0         | 1         | 0         | Bacteria; OD1; SM2F11                                                                                |
| Otu2042 | 3        | 0       | 0       | 0       | 0       | 0       | 0         | 0         | 0         | 0         | 0         | 0         | Bacteria; Proteobacteria; Gammaproteobacteria; Xanthomonadales; Xanthomonadaceae                     |
| Otu2041 | 0        | 0       | 1       | 1       | 0       | 0       | 1         | 2         | 1         | 0         | 2         | 4         | Bacteria; Proteobacteria; Gammaproteobacteria; Legionellales                                         |
| Otu2040 | 6        | 3       | 3       | 1       | 0       | 1       | 3         | 0         | 1         | 1         | 1         | 1         | Bacteria; Proteobacteria; Alphaproteobacteria; Rhizobiales                                           |
| Otu2047 | 0        | 0       | 0       | 0       | 3       | 1       | 0         | 0         | 0         | 1         | 0         | 0         | Bacteria; Chlamydiae; Chlamydia; Chlamydiales                                                        |
| Otu734  | 3        | 0       | 2       | 7       | 5       | 10      | 0         | 2         | 0         | 0         | 7         | 0         | Bacteria; Proteobacteria; Alphaproteobacteria; Rickettsiales; mitochondria                           |
| Otu2045 | 0        | 1       | 1       | 0       | 2       | 1       | 1         | 0         | 0         | 0         | 3         | 0         | Bacteria; Planctomycetes; Planctomycetia; Gemmatales; Gemmataceae; Gemmata                           |
| Otu2044 | 4        | 3       | 2       | 6       | 4       | 0       | 1         | 1         | 1         | 2         | 0         | 0         | Bacteria; Bacteroidetes; Saprospirae; Saprospirales; Chitinophagaceae                                |
| Otu2069 | 0        | 0       | 0       | 0       | 0       | 0       | 0         | 0         | 0         | 0         | 3         | 0         | Bacteria; Acidobacteria; Solibacteres; Solibacterales; AKIW659                                       |
| Otu3181 | 0        | 1       | 0       | 0       | 0       | 1       | 1         | 0         | 0         | 0         | 0         | 5         | Bacteria; Proteobacteria; Alphaproteobacteria; Rickettsiales; mitochondria; Pythium; Pythium_ultimum |
| Otu2049 | 0        | 2       | 2       | 6       | 1       | 0       | 3         | 0         | 0         | 5         | 0         | 2         | Bacteria; Bacteroidetes; Saprospirae; Saprospirales; Chitinophagaceae                                |
| Otu735  | 12       | 3       | 2       | 0       | 0       | 0       | 0         | 0         | 0         | 0         | 4         | 0         | Bacteria; TM6; SJA-4                                                                                 |
| Otu3180 | 1        | 1       | 0       | 2       | 1       | 1       | 1         | 1         | 2         | 1         | 0         | 0         | Bacteria; Proteobacteria; Deltaproteobacteria; Myxococcales                                          |
| Otu1778 | 0        | 1       | 1       | 0       | 0       | 0       | 0         | 1         | 0         | 0         | 5         | 0         | Bacteria; Chlamydiae; Chlamydia; Chlamydiales                                                        |
| Otu1779 | 1        | 0       | 0       | 0       | 2       | 0       | 0         | 1         | 0         | 1         | 0         | 3         | Bacteria; Proteobacteria; Gammaproteobacteria; Legionellales; Coxiellaceae                           |

| #OTU ID | Z31DSO1r | Z31DSO2 | Z31DSO3 | Z31DSO4 | Z31DSO5 | Z31DSO6 | Z31JDSO1 | Z31JDSO2 | Z31JDSO3 | Z31JDSO4 | Z31JDSO5 | Z31JDSO6 | taxonomy                                                                                                                            |
|---------|----------|---------|---------|---------|---------|---------|----------|----------|----------|----------|----------|----------|-------------------------------------------------------------------------------------------------------------------------------------|
| Otu2287 | 0        | 0       | 0       | 0       | 0       | 0       | 2        | 3        | 0        | 2        | 0        | 0        | Bacteria; Proteobacteria; Alphaproteobacteria; Rickettsiales; mitochondria                                                          |
| Otu2286 | 0        | 0       | 1       | 2       | 3       | 0       | 0        | 0        | 0        | 0        | 1        | 0        | Bacteria; Proteobacteria; Gammaproteobacteria; Legionellales; Coxiellaceae; Aquicella                                               |
| Otu2281 | 1        | 1       | 1       | 2       | 2       | 2       | 1        | 0        | 2        | 1        | 0        | 2        | Bacteria; Proteobacteria; Deltaproteobacteria; Myxococcales; Haliangiaceae                                                          |
| Otu2280 | 2        | 1       | 1       | 4       | 3       | 3       | 1        | 2        | 1        | 2        | 1        | 1        | Bacteria; Armatimonadetes; 0319-6E2                                                                                                 |
| Otu2283 | 0        | 0       | 2       | 0       | 0       | 0       | 0        | 0        | 0        | 3        | 0        | 0        | Bacteria; Chlorobi; OPB56                                                                                                           |
| Otu2282 | 2        | 0       | 0       | 2       | 0       | 0       | 1        | 4        | 2        | 2        | 2        | 3        | Bacteria; Bacteroidetes; Cytophagia; Cytophagales; Cytophagaceae; Siphonobacter; Siphonobacter_aquaclararum                         |
| Otu1770 | 0        | 2       | 0       | 0       | 0       | 1       | 3        | 1        | 0        | 0        | 0        | 1        | Bacteria                                                                                                                            |
| Otu1772 | 2        | 0       | 1       | 2       | 0       | 2       | 0        | 1        | 0        | 4        | 3        | 2        | Bacteria; Acidobacteria; Acidobacteria-5                                                                                            |
| Otu1773 | 4        | 0       | 0       | 1       | 0       | 0       | 3        | 0        | 2        | 1        | 1        | 1        | Bacteria; Elusimicrobia; Elusimicrobia; IIb                                                                                         |
| Otu1774 | 4        | 1       | 1       | 3       | 1       | 0       | 0        | 0        | 2        | 0        | 5        | 1        | Bacteria; Verrucomicrobia; Spartobacteria; Chthoniobacteriales; Chthoniobacteraceae; Candidatus_Xiphinematobacter                   |
| Otu1775 | 0        | 3       | 0       | 0       | 0       | 0       | 0        | 0        | 0        | 0        | 1        | 0        | Bacteria; Bacteroidetes; Sphingobacteriia; Sphingobacteriales                                                                       |
| Otu1776 | 0        | 0       | 1       | 0       | 0       | 2       | 1        | 2        | 1        | 9        | 1        | 9        | Bacteria; Chlamydiae; Chlamydia; Chlamydiales; Rhabdochlamydiaceae; Candidatus_Rhabdochlamydia                                      |
| Otu1777 | 5        | 0       | 1       | 4       | 0       | 1       | 2        | 2        | 2        | 2        | 0        | 0        | Bacteria; Armatimonadetes; Chthonomonadetes; Chthonomonadales                                                                       |
| Otu3359 | 0        | 0       | 0       | 1       | 0       | 0       | 4        | 1        | 0        | 1        | 0        | 0        | Bacteria; Proteobacteria; Gammaproteobacteria; Xanthomonadales; Xanthomonadaceae; Stenotrophomonas; Stenotrophomonas_acidaminiphila |
| Otu2936 | 0        | 0       | 0       | 4       | 0       | 0       | 0        | 0        | 1        | 0        | 2        | 0        | Bacteria; Proteobacteria                                                                                                            |
| Otu2934 | 0        | 0       | 0       | 1       | 1       | 1       | 0        | 1        | 2        | 2        | 1        | 0        | Bacteria; OD1; Mb-NB09                                                                                                              |
| Otu1419 | 1        | 2       | 3       | 1       | 0       | 1       | 5        | 6        | 0        | 2        | 2        | 3        | Bacteria; Bacteroidetes; Saprospirae; Saprospirales; Chitinophagaceae                                                               |
| Otu1418 | 0        | 2       | 2       | 4       | 0       | 2       | 2        | 3        | 3        | 1        | 1        | 4        | Bacteria; Actinobacteria; Actinobacteria; Actinomycetales                                                                           |
| Otu1415 | 2        | 0       | 0       | 6       | 1       | 2       | 4        | 4        | 1        | 1        | 2        | 0        | Bacteria; Planctomycetes; Planctomycetia; Gemmatales; Isosphaeraceae                                                                |
| Otu1414 | 0        | 1       | 3       | 2       | 0       | 4       | 1        | 3        | 3        | 8        | 6        | 4        | Bacteria; Proteobacteria; Deltaproteobacteria; Myxococcales                                                                         |
| Otu1417 | 0        | 0       | 1       | 1       | 1       | 0       | 1        | 0        | 0        | 4        | 1        | 1        | Bacteria; Proteobacteria; Gammaproteobacteria                                                                                       |
| Otu1416 | 5        | 7       | 0       | 1       | 4       | 1       | 6        | 1        | 1        | 2        | 4        | 2        | Bacteria; Planctomycetes; Planctomycetia; Pirellulales; Pirellulaceae; Pirellula                                                    |

| #OTU ID | Z31DSO1r | Z31DSO2 | Z31DSO3 | Z31DSO4 | Z31DSO5 | Z31DSO6 | Z31JDSO1 | Z31JDSO2 | Z31JDSO3 | Z31JDSO4 | Z31JDSO5 | Z31JDSO6 | taxonomy                                                                                                                 |
|---------|----------|---------|---------|---------|---------|---------|----------|----------|----------|----------|----------|----------|--------------------------------------------------------------------------------------------------------------------------|
| Otu1411 | 1        | 0       | 1       | 1       | 4       | 0       | 0        | 0        | 2        | 1        | 2        | 0        | Bacteria; Bacteroidetes; Saprospirae; Saprospirales; Chitinophagaceae; Filimonas; Filimonas_lacunae                      |
| Otu1410 | 0        | 0       | 1       | 7       | 3       | 5       | 0        | 0        | 0        | 2        | 1        | 1        | Bacteria; Verrucomicrobia; Spartobacteria; Chthoniobacteriales; Chthoniobacteraceae; Candidatus_Xiphinematobacter        |
| Otu1413 | 6        | 4       | 2       | 0       | 0       | 0       | 0        | 0        | 0        | 0        | 0        | 0        | Bacteria; Acidobacteria; iii1-8; DS-18                                                                                   |
| Otu1412 | 4        | 0       | 0       | 2       | 4       | 0       | 2        | 4        | 1        | 5        | 1        | 1        | Bacteria; Proteobacteria; Alphaproteobacteria                                                                            |
| Otu2662 | 0        | 0       | 4       | 1       | 0       | 1       | 0        | 1        | 1        | 0        | 0        | 0        | Bacteria; Tenericutes; Mollicutes; Anaeroplasmatales; Anaeroplasmataceae; Asteroleplasma                                 |
| Otu2930 | 1        | 0       | 0       | 0       | 1       | 2       | 0        | 0        | 0        | 0        | 0        | 0        | Bacteria; Verrucomicrobia; Pedosphaerae; Pedosphaerales                                                                  |
| Otu2191 | 0        | 0       | 1       | 2       | 2       | 0       | 2        | 0        | 7        | 0        | 9        | 0        | Bacteria; Tenericutes; Mollicutes; Anaeroplasmatales; Anaeroplasmataceae; Asteroleplasma                                 |
| Otu2190 | 3        | 0       | 0       | 0       | 0       | 0       | 0        | 0        | 0        | 0        | 0        | 0        | Bacteria; Cyanobacteria                                                                                                  |
| Otu2193 | 0        | 0       | 0       | 1       | 3       | 4       | 0        | 0        | 0        | 0        | 0        | 0        | Bacteria; Bacteroidetes; Sphingobacteriia; Sphingobacteriales                                                            |
| Otu2192 | 3        | 3       | 1       | 0       | 1       | 3       | 1        | 0        | 0        | 0        | 1        | 1        | Bacteria; Proteobacteria; Deltaproteobacteria; Myxococcales                                                              |
| Otu2195 | 0        | 1       | 0       | 2       | 0       | 1       | 4        | 0        | 0        | 0        | 1        | 1        | Bacteria; Bacteroidetes; Cytophagia; Cytophagales                                                                        |
| Otu2194 | 1        | 1       | 1       | 0       | 0       | 0       | 1        | 0        | 1        | 1        | 3        | 0        | Bacteria; Actinobacteria; Thermoleophilia; Gaiellales                                                                    |
| Otu2197 | 4        | 2       | 0       | 2       | 0       | 3       | 4        | 4        | 1        | 2        | 0        | 1        | Bacteria; Proteobacteria; Gammaproteobacteria; Legionellales; Coxiellaceae; Aquicella                                    |
| Otu2196 | 3        | 0       | 0       | 0       | 0       | 0       | 0        | 0        | 0        | 0        | 0        | 0        | Bacteria; Chloroflexi; Anaerolineae; envOPS12                                                                            |
| Otu2199 | 0        | 1       | 1       | 0       | 0       | 3       | 0        | 0        | 0        | 0        | 1        | 2        | Bacteria; Proteobacteria; Betaproteobacteria                                                                             |
| Otu2198 | 0        | 0       | 0       | 0       | 0       | 0       | 0        | 1        | 3        | 1        | 2        | 0        | Bacteria; TM6; SJA-4                                                                                                     |
| Otu2009 | 1        | 2       | 0       | 1       | 2       | 0       | 4        | 0        | 4        | 0        | 0        | 0        | Bacteria; Planctomycetes; Planctomycetia; Gemmatales; Gemmataceae                                                        |
| Otu2938 | 4        | 0       | 0       | 0       | 0       | 1       | 0        | 0        | 0        | 3        | 0        | 1        | Bacteria; OD1; ZB2                                                                                                       |
| Otu1569 | 5        | 5       | 5       | 8       | 2       | 1       | 4        | 1        | 4        | 9        | 2        | 8        | Bacteria; Proteobacteria; Alphaproteobacteria; Rhodospirillales; Rhodospirillaceae                                       |
| Otu1568 | 0        | 1       | 7       | 4       | 1       | 0       | 0        | 0        | 0        | 3        | 5        | 0        | Bacteria; Chloroflexi; Chloroflexi; Roseiflexales                                                                        |
| Otu38   | 26       | 29      | 30      | 49      | 24      | 10      | 170      | 8        | 44       | 409      | 21       | 169      | Bacteria; Bacteroidetes; Flavobacteriia; Flavobacteriales; Flavobacteriaceae; Flavobacterium; Flavobacterium_succinicans |
| Otu39   | 397      | 149     | 73      | 91      | 73      | 63      | 63       | 56       | 60       | 70       | 95       | 43       | Bacteria; Acidobacteria; Acidobacteria-6; iii1-15                                                                        |



| #OTU ID | Z31DSO1r | Z31DSO2 | Z31DSO3 | Z31DSO4 | Z31DSO5 | Z31DSO6 | Z31JDSO1 | Z31JDSO2 | Z31JDSO3 | Z31JDSO4 | Z31JDSO5 | Z31JDSO6 | taxonomy                                                                                   |
|---------|----------|---------|---------|---------|---------|---------|----------|----------|----------|----------|----------|----------|--------------------------------------------------------------------------------------------|
| Otu36   | 66       | 155     | 67      | 89      | 63      | 56      | 77       | 20       | 11       | 18       | 288      | 47       | Bacteria; Actinobacteria; Actinobacteria; Actinomycetales; Nocardioidaceae; Aeromicrobium  |
| Otu37   | 20       | 2       | 11      | 32      | 0       | 12      | 22       | 220      | 66       | 5        | 2        | 3        | Bacteria; Armatimonadetes; Fimbriimonadia; Fimbriimonadales; Fimbriimonadaceae             |
| Otu34   | 348      | 230     | 359     | 501     | 373     | 276     | 415      | 181      | 265      | 337      | 627      | 180      | Bacteria; Verrucomicrobia; Spartobacteria; Chthoniobacteriales; Chthoniobacteraceae; DA101 |
| Otu35   | 266      | 173     | 110     | 216     | 125     | 99      | 178      | 110      | 101      | 269      | 281      | 160      | Bacteria; Nitrospirae; Nitrospira; Nitrospirales; Nitrospiraceae; Nitrospira               |
| Otu32   | 83       | 140     | 162     | 118     | 175     | 83      | 56       | 56       | 98       | 60       | 251      | 44       | Bacteria; Chloroflexi; Anaerolineae; A31                                                   |
| Otu33   | 0        | 0       | 5       | 3       | 4       | 243     | 8        | 6        | 38       | 22       | 5        | 30       | Bacteria; Chloroflexi; Anaerolineae; SBR1031; A4b                                          |
| Otu31   | 441      | 86      | 45      | 130     | 77      | 70      | 71       | 31       | 33       | 108      | 154      | 29       | Bacteria; Verrucomicrobia; Spartobacteria; Chthoniobacteriales; Chthoniobacteraceae; DA101 |
| Otu2999 | 42       | 32      | 16      | 8       | 6       | 8       | 18       | 22       | 10       | 8        | 10       | 6        | Bacteria; Bacteroidetes; Cytophagia; Cytophagales; Cytophagaceae                           |
| Otu2998 | 4        | 2       | 2       | 2       | 1       | 0       | 2        | 0        | 0        | 1        | 0        | 2        | Bacteria; Proteobacteria; Alphaproteobacteria; Sphingomonadales; Erythrobacteraceae        |
| Otu2991 | 0        | 0       | 0       | 3       | 0       | 0       | 2        | 0        | 0        | 1        | 2        | 2        | Bacteria; Firmicutes; Clostridia; Clostridiales; Lachnospiraceae; Coprococcus              |
| Otu2990 | 0        | 0       | 0       | 0       | 2       | 1       | 2        | 0        | 1        | 1        | 0        | 2        | Bacteria; Proteobacteria; Gammaproteobacteria; Legionellales; Coxiellaceae; Coxiella       |
| Otu2993 | 14       | 4       | 1       | 1       | 3       | 0       | 1        | 0        | 0        | 0        | 5        | 0        | Bacteria; Verrucomicrobia; Spartobacteria; Chthoniobacteriales; Chthoniobacteraceae; DA101 |
| Otu2992 | 2        | 1       | 0       | 1       | 0       | 1       | 2        | 0        | 0        | 0        | 0        | 0        | Bacteria; Proteobacteria; Alphaproteobacteria; Rhodospirillales; Rhodospirillaceae         |
| Otu2995 | 0        | 1       | 0       | 0       | 0       | 0       | 1        | 1        | 0        | 0        | 2        | 0        | Bacteria; Proteobacteria; Alphaproteobacteria; Rickettsiales; mitochondria                 |
| Otu2994 | 0        | 0       | 0       | 0       | 0       | 0       | 0        | 0        | 0        | 0        | 2        | 0        | Bacteria; Chloroflexi; Chloroflexi; Roseiflexales                                          |
| Otu2997 | 0        | 0       | 0       | 0       | 0       | 1       | 0        | 1        | 2        | 0        | 0        | 0        | Bacteria; OD1; ZB2                                                                         |
| Otu2996 | 1        | 0       | 0       | 0       | 0       | 1       | 0        | 0        | 0        | 0        | 2        | 0        | Bacteria; Cyanobacteria                                                                    |
| Otu3251 | 3        | 0       | 2       | 1       | 3       | 0       | 1        | 0        | 1        | 0        | 1        | 1        | Bacteria; Planctomycetes; Planctomycetia; Pirellulales; Pirellulaceae                      |
| Otu2865 | 3        | 0       | 1       | 1       | 1       | 1       | 1        | 1        | 1        | 1        | 1        | 1        | Bacteria; TM7; TM7-1                                                                       |
| Otu2864 | 2        | 0       | 0       | 0       | 0       | 0       | 0        | 0        | 1        | 1        | 0        | 4        | Bacteria; Acidobacteria; Acidobacteriia; Acidobacteriales; Acidobacteriaceae               |
| Otu2867 | 2        | 0       | 0       | 1       | 0       | 0       | 0        | 0        | 1        | 0        | 1        | 0        | Bacteria; OP11; OP11-3                                                                     |
| Otu2866 | 0        | 0       | 2       | 0       | 0       | 0       | 1        | 0        | 0        | 0        | 0        | 0        | Bacteria; Planctomycetes; Planctomycetia; Gemmatales; Gemmataceae; Gemmata                 |

| #OTU ID | Z31DSO1r | Z31DSO2 | Z31DSO3 | Z31DSO4 | Z31DSO5 | Z31DSO6 | Z31J1DSO1 | Z31J1DSO2 | Z31J1DSO3 | Z31J1DSO4 | Z31J1DSO5 | Z31J1DSO6 | taxonomy                                                                                         |
|---------|----------|---------|---------|---------|---------|---------|-----------|-----------|-----------|-----------|-----------|-----------|--------------------------------------------------------------------------------------------------|
| Otu2861 | 0        | 0       | 1       | 1       | 0       | 1       | 4         | 3         | 3         | 4         | 0         | 2         | Bacteria; Bacteroidetes; Saprospirae; Saprospirales                                              |
| Otu2860 | 2        | 0       | 0       | 0       | 0       | 0       | 0         | 0         | 0         | 0         | 0         | 0         | Bacteria                                                                                         |
| Otu2863 | 11       | 5       | 2       | 3       | 4       | 0       | 2         | 2         | 4         | 3         | 17        | 4         | Bacteria; Proteobacteria; Alphaproteobacteria; Sphingomonadales; Sphingomonadaceae; Kaistobacter |
| Otu2862 | 0        | 0       | 1       | 0       | 0       | 0       | 0         | 0         | 0         | 0         | 2         | 0         | Bacteria; Proteobacteria; Deltaproteobacteria; MIZ46                                             |
| Otu1103 | 16       | 3       | 2       | 4       | 2       | 3       | 4         | 4         | 8         | 14        | 5         | 3         | Bacteria; Chlorobi                                                                               |
| Otu2869 | 3        | 0       | 2       | 0       | 1       | 0       | 1         | 0         | 3         | 0         | 1         | 0         | Bacteria; Chloroflexi; Anaerolineae; A31                                                         |
| Otu2868 | 6        | 3       | 7       | 2       | 6       | 5       | 2         | 0         | 3         | 2         | 3         | 0         | Bacteria; Chloroflexi; Anaerolineae; WCHB1-50                                                    |
| Otu1102 | 24       | 21      | 8       | 4       | 6       | 7       | 6         | 3         | 0         | 15        | 11        | 8         | Bacteria; Gemmatimonadetes; Gemm-1                                                               |
| Otu2739 | 0        | 0       | 2       | 0       | 0       | 0       | 0         | 0         | 0         | 0         | 0         | 0         | Bacteria; Proteobacteria; Alphaproteobacteria; Rhodospirillales; Rhodospirillaceae               |
| Otu1101 | 0        | 2       | 3       | 0       | 6       | 0       | 0         | 0         | 0         | 1         | 0         | 0         | Bacteria; Chloroflexi; Anaerolineae; CFB-26                                                      |
| Otu2216 | 0        | 0       | 0       | 0       | 0       | 3       | 0         | 0         | 1         | 3         | 1         | 0         | Bacteria; Cyanobacteria; 4C0d-2; MLE1-12                                                         |
| Otu2735 | 0        | 1       | 0       | 1       | 0       | 1       | 0         | 0         | 1         | 0         | 2         | 0         | Bacteria; Proteobacteria; Deltaproteobacteria; Myxococcales                                      |
| Otu2734 | 0        | 1       | 3       | 0       | 0       | 0       | 1         | 2         | 0         | 0         | 1         | 0         | Bacteria; Proteobacteria; Gammaproteobacteria; Legionellales                                     |
| Otu2737 | 0        | 0       | 0       | 0       | 2       | 0       | 0         | 0         | 0         | 0         | 3         | 1         | Bacteria; Proteobacteria; Deltaproteobacteria; Myxococcales                                      |
| Otu1100 | 4        | 2       | 5       | 14      | 1       | 3       | 1         | 0         | 3         | 3         | 0         | 2         | Bacteria; Armatimonadetes; Armatimonadia; FW68                                                   |
| Otu2731 | 0        | 0       | 0       | 0       | 2       | 0       | 0         | 0         | 0         | 0         | 1         | 0         | Bacteria; Planctomycetes; Phycisphaerae; WD2101                                                  |
| Otu2730 | 2        | 0       | 0       | 0       | 0       | 0       | 0         | 0         | 0         | 0         | 0         | 0         | Bacteria; Planctomycetes; Planctomycetia; Gemmatales; Gemmataceae                                |
| Otu2733 | 0        | 2       | 2       | 1       | 0       | 0       | 1         | 1         | 0         | 0         | 3         | 1         | Bacteria; Cyanobacteria; ML635J-21                                                               |
| Otu2732 | 2        | 0       | 0       | 0       | 0       | 0       | 0         | 0         | 0         | 0         | 1         | 0         | Bacteria; Proteobacteria                                                                         |
| Otu426  | 21       | 16      | 22      | 27      | 1       | 25      | 41        | 26        | 3         | 6         | 4         | 14        | Bacteria; Proteobacteria; Gammaproteobacteria; Xanthomonadales; Xanthomonadaceae; Rhodanobacter  |
| Otu427  | 38       | 42      | 24      | 31      | 17      | 31      | 36        | 21        | 25        | 12        | 38        | 24        | Bacteria; Actinobacteria; Actinobacteria; Actinomycetales; Micromonosporaceae; Catellatospora    |
| Otu424  | 6        | 1       | 6       | 7       | 0       | 27      | 11        | 12        | 6         | 7         | 1         | 14        | Bacteria; Acidobacteria; DA052; Ellin6513                                                        |

| #OTU ID | Z31DSO1r | Z31DSO2 | Z31DSO3 | Z31DSO4 | Z31DSO5 | Z31DSO6 | Z31JDSO1 | Z31JDSO2 | Z31JDSO3 | Z31JDSO4 | Z31JDSO5 | Z31JDSO6 | taxonomy                                                                                                      |
|---------|----------|---------|---------|---------|---------|---------|----------|----------|----------|----------|----------|----------|---------------------------------------------------------------------------------------------------------------|
| Otu3488 | 2        | 0       | 0       | 0       | 0       | 0       | 0        | 0        | 0        | 0        | 1        | 0        | Bacteria; Bacteroidetes                                                                                       |
| Otu425  | 27       | 17      | 40      | 29      | 31      | 45      | 33       | 15       | 19       | 19       | 52       | 12       | Bacteria; Chloroflexi; Chloroflexi; Roseiflexales; Kouleothrixaceae                                           |
| Otu2217 | 0        | 1       | 4       | 2       | 0       | 1       | 3        | 1        | 1        | 0        | 3        | 0        | Bacteria; Proteobacteria; Deltaproteobacteria; Myxococcales; Nannocystaceae; Nannocystis; Nannocystis_exedens |
| Otu1189 | 2        | 2       | 7       | 1       | 5       | 4       | 1        | 2        | 2        | 1        | 3        | 0        | Bacteria; Proteobacteria; Deltaproteobacteria; Myxococcales                                                   |
| Otu1188 | 2        | 0       | 2       | 3       | 0       | 7       | 0        | 2        | 9        | 1        | 3        | 2        | Bacteria; Armatimonadetes; Chthonomonadetes; Chthonomonadales; Chthonomonadaceae                              |
| Otu1187 | 3        | 0       | 0       | 0       | 0       | 0       | 7        | 0        | 0        | 0        | 0        | 0        | Bacteria; Proteobacteria; Gammaproteobacteria; Xanthomonadales; Xanthomonadaceae                              |
| Otu422  | 42       | 10      | 15      | 9       | 6       | 9       | 13       | 13       | 18       | 8        | 19       | 5        | Bacteria; Proteobacteria; Alphaproteobacteria; Rhodospirillales; Acetobacteraceae                             |
| Otu1185 | 6        | 3       | 1       | 4       | 1       | 2       | 0        | 0        | 0        | 1        | 1        | 2        | Bacteria; Armatimonadetes; Fimbriimonadia; Fimbriimonadales; Fimbriimonadaceae; Fimbriimonas                  |
| Otu1184 | 0        | 0       | 0       | 1       | 0       | 2       | 1        | 3        | 3        | 10       | 2        | 2        | Bacteria; Proteobacteria; Alphaproteobacteria; Rhodospirillales; Rhodospirillaceae                            |
| Otu1183 | 3        | 8       | 3       | 5       | 3       | 7       | 3        | 7        | 5        | 15       | 4        | 6        | Bacteria; Verrucomicrobia; Pedosphaerae; Pedosphaerales                                                       |
| Otu1182 | 2        | 3       | 1       | 0       | 2       | 1       | 2        | 1        | 1        | 2        | 6        | 1        | Bacteria; Chloroflexi; Anaerolineae; GCA004                                                                   |
| Otu1181 | 84       | 17      | 28      | 25      | 7       | 14      | 48       | 32       | 28       | 26       | 15       | 25       | Bacteria; Proteobacteria; Alphaproteobacteria; Ellin329                                                       |
| Otu423  | 2        | 29      | 7       | 0       | 0       | 0       | 0        | 0        | 0        | 0        | 0        | 0        | Bacteria; Chloroflexi; Anaerolineae; CFB-26                                                                   |
| Otu1341 | 5        | 0       | 3       | 1       | 1       | 1       | 1        | 0        | 0        | 1        | 2        | 1        | Bacteria; Acidobacteria; Solibacteres; Solibacterales; Solibacteraceae; Candidatus_Solibacter                 |
| Otu1340 | 12       | 8       | 2       | 6       | 2       | 4       | 13       | 4        | 5        | 5        | 6        | 3        | Bacteria; Planctomycetes; Planctomycetia; Pirellulales; Pirellulaceae                                         |
| Otu1343 | 14       | 3       | 8       | 5       | 3       | 4       | 9        | 5        | 13       | 4        | 14       | 2        | Bacteria; Planctomycetes; Planctomycetia; Gemmatales; Gemmataceae; Gemmata                                    |
| Otu1342 | 9        | 1       | 1       | 1       | 0       | 1       | 6        | 1        | 1        | 0        | 1        | 1        | Bacteria; Chloroflexi; Thermomicrobia; Ellin6537                                                              |
| Otu1345 | 6        | 2       | 5       | 2       | 5       | 2       | 0        | 1        | 0        | 2        | 3        | 0        | Bacteria; Verrucomicrobia; Pedosphaerae; Pedosphaerales                                                       |
| Otu352  | 2        | 0       | 4       | 3       | 1       | 29      | 0        | 2        | 0        | 5        | 3        | 13       | Bacteria; Chloroflexi; Ktedonobacteria                                                                        |
| Otu1347 | 1        | 0       | 0       | 0       | 6       | 0       | 0        | 0        | 0        | 0        | 0        | 0        | Bacteria; Proteobacteria; Alphaproteobacteria                                                                 |
| Otu1346 | 5        | 1       | 0       | 3       | 0       | 2       | 1        | 0        | 1        | 0        | 0        | 0        | Bacteria; Chloroflexi; Ellin6529                                                                              |
| Otu1349 | 6        | 1       | 5       | 2       | 6       | 1       | 0        | 0        | 0        | 0        | 2        | 0        | Bacteria; WS3; PRR-12; Sediment-1                                                                             |

| #OTU ID | Z31DSO1r | Z31DSO2 | Z31DSO3 | Z31DSO4 | Z31DSO5 | Z31DSO6 | Z31JDSO1 | Z31JDSO2 | Z31JDSO3 | Z31JDSO4 | Z31JDSO5 | Z31JDSO6 | taxonomy                                                                                           |
|---------|----------|---------|---------|---------|---------|---------|----------|----------|----------|----------|----------|----------|----------------------------------------------------------------------------------------------------|
| Otu1348 | 1        | 0       | 0       | 5       | 0       | 3       | 1        | 0        | 0        | 2        | 1        | 4        | Bacteria; Proteobacteria; Alphaproteobacteria; Rickettsiales                                       |
| Otu421  | 49       | 3       | 0       | 7       | 2       | 1       | 0        | 2        | 1        | 1        | 5        | 0        | Bacteria; Bacteroidetes; Saprospirae; Saprospirales; Chitinophagaceae                              |
| Otu2068 | 10       | 3       | 2       | 4       | 1       | 6       | 4        | 3        | 3        | 4        | 4        | 2        | Bacteria; TM7; SC3                                                                                 |
| Otu480  | 3        | 2       | 4       | 20      | 2       | 2       | 11       | 8        | 3        | 0        | 7        | 0        | Bacteria; Proteobacteria; Gammaproteobacteria; Legionellales; Coxiellaceae; Aquicella              |
| Otu481  | 9        | 5       | 3       | 4       | 5       | 3       | 7        | 5        | 23       | 8        | 5        | 13       | Bacteria; Bacteroidetes; Sphingobacteriia; Sphingobacteriales                                      |
| Otu482  | 3        | 6       | 5       | 13      | 6       | 9       | 6        | 13       | 13       | 15       | 20       | 6        | Bacteria; Proteobacteria                                                                           |
| Otu483  | 40       | 9       | 16      | 28      | 14      | 18      | 21       | 14       | 17       | 26       | 13       | 15       | Bacteria; Planctomycetes; Phycisphaerae; WD2101                                                    |
| Otu484  | 8        | 4       | 19      | 27      | 9       | 12      | 31       | 12       | 25       | 17       | 29       | 7        | Bacteria; Chloroflexi; C0119                                                                       |
| Otu485  | 26       | 8       | 2       | 1       | 4       | 0       | 5        | 3        | 2        | 2        | 10       | 0        | Bacteria; Gemmatimonadetes; Gemm-5                                                                 |
| Otu486  | 1        | 2       | 11      | 10      | 10      | 16      | 16       | 23       | 1        | 7        | 12       | 27       | Bacteria; Proteobacteria; Gammaproteobacteria; Xanthomonadales; Xanthomonadaceae; Stenotrophomonas |
| Otu487  | 0        | 1       | 0       | 22      | 0       | 0       | 0        | 0        | 0        | 0        | 4        | 0        | Bacteria; Bacteroidetes                                                                            |
| Otu488  | 1        | 0       | 6       | 2       | 7       | 2       | 7        | 5        | 3        | 24       | 1        | 4        | Bacteria; Firmicutes; Bacilli; Bacillales; Paenibacillaceae; Cohnella                              |
| Otu489  | 10       | 31      | 27      | 24      | 29      | 13      | 1        | 0        | 6        | 16       | 26       | 7        | Bacteria; Chloroflexi; Anaerolineae; SBR1031; A4b                                                  |
| Otu334  | 63       | 10      | 5       | 6       | 6       | 5       | 11       | 4        | 1        | 2        | 2        | 2        | Bacteria; Proteobacteria; Betaproteobacteria                                                       |
| Otu335  | 24       | 14      | 19      | 14      | 2       | 12      | 68       | 41       | 13       | 7        | 11       | 5        | Bacteria; Actinobacteria; Thermoleophilia; Solirubrobacterales                                     |
| Otu332  | 24       | 10      | 16      | 39      | 11      | 24      | 28       | 11       | 25       | 30       | 40       | 20       | Bacteria                                                                                           |
| Otu333  | 60       | 11      | 25      | 41      | 13      | 15      | 16       | 15       | 24       | 46       | 34       | 20       | Bacteria; Acidobacteria; Solibacteres; Solibacterales                                              |
| Otu330  | 100      | 45      | 46      | 48      | 19      | 26      | 79       | 32       | 58       | 40       | 46       | 33       | Bacteria; Proteobacteria; Alphaproteobacteria; Rhizobiales; Hyphomicrobiaceae; Rhodoplanes         |
| Otu331  | 57       | 14      | 27      | 21      | 26      | 7       | 25       | 6        | 8        | 12       | 55       | 4        | Bacteria; Acidobacteria; Solibacteres; Solibacterales                                              |
| Otu2609 | 0        | 2       | 0       | 4       | 0       | 2       | 0        | 0        | 0        | 0        | 2        | 0        | Bacteria; Acidobacteria; Solibacteres; Solibacterales                                              |
| Otu2608 | 0        | 0       | 0       | 0       | 1       | 1       | 1        | 1        | 2        | 0        | 2        | 0        | Bacteria; Proteobacteria; Gammaproteobacteria; Legionellales                                       |
| Otu2601 | 2        | 0       | 0       | 0       | 1       | 0       | 0        | 0        | 0        | 0        | 1        | 0        | Bacteria; Bacteroidetes; Sphingobacteriia; Sphingobacteriales                                      |

| #OTU ID | Z31DSO1r | Z31DSO2 | Z31DSO3 | Z31DSO4 | Z31DSO5 | Z31DSO6 | Z31JDSO1 | Z31JDSO2 | Z31JDSO3 | Z31JDSO4 | Z31JDSO5 | Z31JDSO6 | taxonomy                                                                                    |
|---------|----------|---------|---------|---------|---------|---------|----------|----------|----------|----------|----------|----------|---------------------------------------------------------------------------------------------|
| Otu2600 | 0        | 1       | 1       | 0       | 0       | 0       | 0        | 0        | 2        | 0        | 0        | 0        | Bacteria; Proteobacteria; Alphaproteobacteria                                               |
| Otu2603 | 0        | 0       | 2       | 1       | 2       | 0       | 0        | 0        | 1        | 0        | 3        | 0        | Bacteria; Planctomycetes; Planctomycetia; Gemmatales; Gemmataceae                           |
| Otu2602 | 0        | 0       | 0       | 4       | 0       | 0       | 1        | 0        | 1        | 0        | 0        | 0        | Bacteria; Verrucomicrobia; Spartobacteria; Chthoniobacteriales; Chthoniobacteraceae         |
| Otu2605 | 2        | 0       | 0       | 0       | 0       | 0       | 0        | 0        | 0        | 0        | 0        | 0        | Bacteria; Acidobacteria; Acidobacteria-6                                                    |
| Otu2067 | 1        | 0       | 2       | 0       | 2       | 0       | 1        | 0        | 4        | 0        | 1        | 1        | Bacteria; Chloroflexi; Thermomicrobia; AKYG1722                                             |
| Otu2607 | 2        | 0       | 0       | 0       | 0       | 0       | 0        | 0        | 0        | 0        | 0        | 0        | Bacteria                                                                                    |
| Otu2606 | 0        | 0       | 0       | 0       | 0       | 0       | 2        | 0        | 0        | 0        | 0        | 0        | Bacteria; Chlamydiae; Chlamydia; Chlamydiales                                               |
| Otu2066 | 24       | 33      | 20      | 21      | 23      | 35      | 9        | 12       | 24       | 39       | 42       | 11       | Bacteria; Chloroflexi; Anaerolineae; SBR1031; oc28                                          |
| Otu158  | 6        | 3       | 16      | 8       | 6       | 5       | 110      | 3        | 8        | 4        | 3        | 10       | Bacteria; Proteobacteria; Alphaproteobacteria; Rhizobiales                                  |
| Otu3122 | 0        | 0       | 0       | 2       | 0       | 0       | 0        | 0        | 0        | 0        | 1        | 0        | Bacteria; Cyanobacteria                                                                     |
| Otu152  | 225      | 125     | 143     | 204     | 108     | 70      | 105      | 86       | 126      | 151      | 88       | 239      | Bacteria; Proteobacteria; Betaproteobacteria; Burkholderiales; Comamonadaceae               |
| Otu153  | 60       | 35      | 62      | 106     | 67      | 87      | 70       | 45       | 67       | 93       | 84       | 37       | Bacteria; Bacteroidetes; Saprospirae; Saprospirales; Chitinophagaceae                       |
| Otu150  | 142      | 42      | 28      | 34      | 28      | 32      | 49       | 21       | 31       | 49       | 67       | 15       | Bacteria; Acidobacteria; Acidobacteria-6; iii1-15                                           |
| Otu151  | 70       | 11      | 12      | 20      | 7       | 13      | 19       | 7        | 9        | 13       | 9        | 5        | Bacteria; Planctomycetes; Planctomycetia; Planctomycetales; Planctomycetaceae; Planctomyces |
| Otu156  | 57       | 31      | 54      | 96      | 63      | 99      | 154      | 104      | 117      | 49       | 53       | 59       | Bacteria; Bacteroidetes; Sphingobacteriia; Sphingobacteriales; Sphingobacteriaceae          |
| Otu157  | 122      | 43      | 18      | 59      | 37      | 4       | 34       | 23       | 18       | 27       | 67       | 26       | Bacteria; Gemmatimonadetes; Gemmatimonadetes; Gemmatimonadales; Ellin5301                   |
| Otu154  | 48       | 14      | 44      | 43      | 21      | 54      | 46       | 50       | 45       | 83       | 42       | 21       | Bacteria; Verrucomicrobia; Opitutae; Opitutales; Opitutaceae; Opitutus                      |
| Otu155  | 86       | 21      | 21      | 14      | 11      | 7       | 36       | 4        | 3        | 25       | 25       | 9        | Bacteria; Proteobacteria; Alphaproteobacteria; Rhodospirillales; Rhodospirillaceae          |
| Otu938  | 5        | 1       | 5       | 5       | 8       | 1       | 0        | 1        | 3        | 4        | 5        | 0        | Bacteria                                                                                    |
| Otu939  | 21       | 13      | 12      | 11      | 20      | 6       | 15       | 6        | 7        | 3        | 13       | 9        | Bacteria; Acidobacteria; Acidobacteria-6; iii1-15                                           |
| Otu2517 | 2        | 2       | 3       | 4       | 2       | 2       | 1        | 0        | 0        | 5        | 2        | 0        | Bacteria; Proteobacteria; Alphaproteobacteria; Ellin329                                     |
| Otu2516 | 22       | 18      | 16      | 7       | 2       | 4       | 12       | 2        | 0        | 2        | 12       | 4        | Bacteria; Actinobacteria; Actinobacteria; Actinomycetales; Micromonosporaceae               |

| #OTU ID | Z31DSO1r | Z31DSO2 | Z31DSO3 | Z31DSO4 | Z31DSO5 | Z31DSO6 | Z31J1DSO1 | Z31J1DSO2 | Z31J1DSO3 | Z31J1DSO4 | Z31J1DSO5 | Z31J1DSO6 | taxonomy                                                                                           |
|---------|----------|---------|---------|---------|---------|---------|-----------|-----------|-----------|-----------|-----------|-----------|----------------------------------------------------------------------------------------------------|
| Otu2511 | 3        | 3       | 2       | 1       | 0       | 0       | 0         | 0         | 1         | 2         | 1         | 0         | Bacteria; Acidobacteria; Acidobacteria-5                                                           |
| Otu2510 | 0        | 0       | 2       | 0       | 0       | 0       | 2         | 1         | 0         | 0         | 1         | 0         | Bacteria; Planctomycetes; Planctomycetia; Gemmatales; Gemmataceae                                  |
| Otu2513 | 4        | 0       | 1       | 0       | 0       | 0       | 0         | 0         | 1         | 0         | 1         | 1         | Bacteria; Actinobacteria; Thermoleophilia; Solirubrobacterales; Patulibacteraceae                  |
| Otu2512 | 2        | 0       | 2       | 0       | 0       | 1       | 0         | 0         | 0         | 0         | 0         | 0         | Bacteria; AD3; ABS-6                                                                               |
| Otu930  | 2        | 1       | 0       | 2       | 0       | 3       | 3         | 9         | 9         | 4         | 0         | 3         | Bacteria; Acidobacteria; Acidobacteria-6; iii1-15; RB40                                            |
| Otu931  | 53       | 30      | 23      | 50      | 27      | 27      | 50        | 17        | 33        | 34        | 61        | 22        | Bacteria; Proteobacteria; Deltaproteobacteria; Myxococcales                                        |
| Otu932  | 3        | 1       | 4       | 10      | 4       | 18      | 7         | 5         | 11        | 11        | 3         | 8         | Bacteria; Proteobacteria; Deltaproteobacteria; Syntrophobacterales; Syntrophobacteraceae           |
| Otu933  | 13       | 1       | 4       | 4       | 3       | 0       | 5         | 8         | 2         | 9         | 12        | 5         | Bacteria; Gemmatimonadetes; Gemmatimonadetes; Gemmatimonadales; Ellin5301                          |
| Otu934  | 7        | 0       | 0       | 9       | 0       | 0       | 0         | 0         | 2         | 6         | 1         | 1         | Bacteria; Bacteroidetes; Flavobacteriia; Flavobacteriales; Cryomorphaceae; Fluviicola              |
| Otu935  | 2        | 11      | 4       | 5       | 1       | 3       | 10        | 6         | 4         | 3         | 14        | 2         | Bacteria; Firmicutes; Bacilli; Bacillales; Bacillaceae; Bacillus                                   |
| Otu936  | 8        | 2       | 8       | 7       | 2       | 5       | 8         | 2         | 4         | 5         | 3         | 5         | Bacteria; Planctomycetes; Phycisphaerae; WD2101                                                    |
| Otu937  | 11       | 4       | 1       | 1       | 0       | 1       | 1         | 0         | 1         | 2         | 2         | 1         | Bacteria; Verrucomicrobia; Spartobacteria; Chthoniobacterales; Chthoniobacteraceae; OR-59          |
| Otu2269 | 3        | 1       | 0       | 1       | 1       | 0       | 0         | 0         | 0         | 0         | 0         | 0         | Bacteria; Proteobacteria; Deltaproteobacteria; Bdellovibrionales; Bdellovibrionaceae; Bdellovibrio |
| Otu3028 | 2        | 3       | 0       | 0       | 0       | 0       | 0         | 0         | 0         | 0         | 0         | 0         | Bacteria; Bacteroidetes; Saprospirae; Saprospirales; Chitinophagaceae                              |
| Otu3029 | 0        | 0       | 1       | 0       | 0       | 0       | 0         | 1         | 0         | 2         | 0         | 1         | Bacteria; Proteobacteria; Alphaproteobacteria                                                      |
| Otu3026 | 2        | 3       | 1       | 0       | 0       | 0       | 0         | 0         | 2         | 2         | 2         | 2         | Bacteria; Bacteroidetes; Sphingobacteriia; Sphingobacteriales                                      |
| Otu3027 | 1        | 1       | 0       | 0       | 0       | 0       | 0         | 2         | 0         | 0         | 1         | 0         | Bacteria; Chloroflexi; Anaerolineae; Caldilineales; Caldilineaceae                                 |
| Otu3024 | 8        | 17      | 14      | 12      | 16      | 7       | 10        | 5         | 11        | 4         | 24        | 14        | Bacteria; Verrucomicrobia; Pedosphaerae; Pedosphaerales; Ellin515                                  |
| Otu2268 | 6        | 3       | 11      | 13      | 4       | 3       | 7         | 4         | 6         | 6         | 3         | 5         | Bacteria; Planctomycetes; Phycisphaerae; WD2101                                                    |
| Otu3022 | 1        | 0       | 1       | 1       | 2       | 0       | 0         | 1         | 1         | 2         | 4         | 1         | Bacteria; Proteobacteria; TA18; PHOS-HD29                                                          |
| Otu3023 | 2        | 0       | 0       | 1       | 1       | 0       | 1         | 0         | 2         | 0         | 0         | 0         | Bacteria; Proteobacteria; Deltaproteobacteria; FAC87                                               |
| Otu3020 | 0        | 0       | 1       | 0       | 0       | 0       | 0         | 2         | 0         | 2         | 0         | 0         | Bacteria; Proteobacteria; Alphaproteobacteria; Rickettsiales; mitochondria                         |

| #OTU ID | Z31DSO1r | Z31DSO2 | Z31DSO3 | Z31DSO4 | Z31DSO5 | Z31DSO6 | Z31J1DSO1 | Z31J1DSO2 | Z31J1DSO3 | Z31J1DSO4 | Z31J1DSO5 | Z31J1DSO6 | taxonomy                                                                                     |
|---------|----------|---------|---------|---------|---------|---------|-----------|-----------|-----------|-----------|-----------|-----------|----------------------------------------------------------------------------------------------|
| Otu3021 | 0        | 0       | 0       | 2       | 0       | 1       | 0         | 0         | 0         | 0         | 0         | 0         | Bacteria; Chloroflexi; TK10                                                                  |
| Otu2616 | 0        | 0       | 0       | 0       | 0       | 0       | 0         | 2         | 0         | 0         | 0         | 0         | Bacteria; Proteobacteria                                                                     |
| Otu1969 | 1        | 0       | 2       | 6       | 2       | 0       | 8         | 2         | 0         | 6         | 6         | 1         | Bacteria; Bacteroidetes; Cytophagia; Cytophagales; Cytophagaceae; Dyadobacter                |
| Otu1968 | 0        | 0       | 0       | 3       | 0       | 1       | 0         | 0         | 0         | 0         | 1         | 0         | Bacteria; Proteobacteria; Deltaproteobacteria                                                |
| Otu1965 | 0        | 0       | 1       | 0       | 0       | 0       | 0         | 0         | 0         | 0         | 3         | 0         | Bacteria; Proteobacteria; Gammaproteobacteria                                                |
| Otu1964 | 3        | 2       | 0       | 1       | 0       | 1       | 2         | 0         | 1         | 2         | 3         | 1         | Bacteria; Proteobacteria; Deltaproteobacteria                                                |
| Otu1967 | 4        | 5       | 2       | 2       | 0       | 1       | 4         | 2         | 0         | 3         | 4         | 2         | Bacteria; Actinobacteria; Acidimicrobiia; Acidimicrobiales; Iamiaceae; Iamia                 |
| Otu1966 | 0        | 0       | 0       | 1       | 3       | 3       | 0         | 1         | 1         | 0         | 1         | 0         | Bacteria; Proteobacteria; Alphaproteobacteria; Rickettsiales; mitochondria                   |
| Otu1961 | 2        | 3       | 0       | 0       | 0       | 0       | 0         | 1         | 0         | 1         | 1         | 1         | Bacteria; Actinobacteria; Acidimicrobiia; Acidimicrobiales                                   |
| Otu1960 | 3        | 0       | 2       | 0       | 0       | 0       | 0         | 0         | 0         | 0         | 0         | 0         | Bacteria; Proteobacteria; Deltaproteobacteria; Myxococcales                                  |
| Otu1963 | 38       | 11      | 7       | 12      | 3       | 11      | 21        | 16        | 17        | 5         | 3         | 22        | Bacteria; Proteobacteria; Alphaproteobacteria; Ellin329                                      |
| Otu1962 | 1        | 0       | 1       | 1       | 0       | 1       | 0         | 0         | 3         | 0         | 0         | 1         | Bacteria; WS3; PRR-12; LD1-PA13                                                              |
| Otu804  | 2        | 10      | 2       | 10      | 5       | 8       | 10        | 7         | 7         | 5         | 6         | 13        | Bacteria; Armatimonadetes; Fimbriimonadia; Fimbriimonadales; Fimbriimonadaceae; Fimbriimonas |
| Otu805  | 0        | 3       | 11      | 0       | 1       | 0       | 0         | 0         | 0         | 0         | 1         | 2         | Bacteria; Bacteroidetes; Saprospirae; Saprospirales; Saprospiraceae                          |
| Otu806  | 10       | 5       | 0       | 7       | 2       | 2       | 16        | 15        | 11        | 19        | 11        | 10        | Bacteria; Proteobacteria; Alphaproteobacteria; Rhodospirillales; Rhodospirillaceae           |
| Otu807  | 1        | 4       | 4       | 16      | 2       | 4       | 1         | 7         | 4         | 6         | 5         | 7         | Bacteria; Bacteroidetes; Sphingobacteriia; Sphingobacteriales                                |
| Otu800  | 3        | 1       | 3       | 1       | 1       | 2       | 1         | 7         | 8         | 4         | 10        | 6         | Bacteria; Planctomycetes; Phycisphaerae; WD2101                                              |
| Otu801  | 15       | 6       | 3       | 10      | 9       | 3       | 9         | 2         | 5         | 12        | 19        | 5         | Bacteria; Nitrospirae; Nitrospira; Nitrospirales; Nitrospiraceae; Nitrospira                 |
| Otu802  | 28       | 25      | 7       | 11      | 12      | 1       | 8         | 5         | 2         | 7         | 21        | 1         | Bacteria; Gemmatimonadetes; Gemmatimonadetes; N1423WL                                        |
| Otu803  | 1        | 0       | 0       | 3       | 5       | 0       | 0         | 0         | 0         | 0         | 9         | 0         | Bacteria; Cyanobacteria; Nostocophycidae; Nostocales; Nostocaceae                            |
| Otu3129 | 1        | 2       | 0       | 0       | 0       | 0       | 0         | 0         | 0         | 0         | 0         | 0         | Bacteria; Verrucomicrobia; Spartobacteria; Chthoniobacteriales; Chthoniobacteraceae          |
| Otu3128 | 0        | 0       | 0       | 0       | 0       | 0       | 0         | 0         | 0         | 0         | 3         | 0         | Bacteria; Cyanobacteria; Chloroplast                                                         |

| #OTU ID | Z31DSO1r | Z31DSO2 | Z31DSO3 | Z31DSO4 | Z31DSO5 | Z31DSO6 | Z31JDSO1 | Z31JDSO2 | Z31JDSO3 | Z31JDSO4 | Z31JDSO5 | Z31JDSO6 | taxonomy                                                                                                         |
|---------|----------|---------|---------|---------|---------|---------|----------|----------|----------|----------|----------|----------|------------------------------------------------------------------------------------------------------------------|
| Otu808  | 1        | 2       | 6       | 18      | 9       | 28      | 2        | 11       | 26       | 1        | 9        | 2        | Bacteria; Chloroflexi; Anaerolineae; SBR1031; oc28                                                               |
| Otu809  | 19       | 5       | 1       | 1       | 3       | 4       | 5        | 2        | 2        | 0        | 6        | 2        | Bacteria; Proteobacteria; Deltaproteobacteria; Syntrophobacterales; Syntrophobacteraceae                         |
| Otu2461 | 1        | 3       | 5       | 4       | 2       | 0       | 1        | 0        | 0        | 2        | 0        | 2        | Bacteria; Verrucomicrobia; Spartobacteria; Chthoniobacterales; Chthoniobacteraceae; Candidatus_Xiphinematobacter |
| Otu2460 | 3        | 0       | 0       | 2       | 0       | 0       | 0        | 0        | 0        | 0        | 0        | 0        | Bacteria; AD3; JG37-AG-4                                                                                         |
| Otu2463 | 2        | 1       | 3       | 4       | 5       | 0       | 5        | 1        | 2        | 1        | 4        | 1        | Bacteria; Actinobacteria; Thermoleophilia; Gaiellales; Gaiellaceae                                               |
| Otu2462 | 0        | 0       | 1       | 2       | 1       | 5       | 1        | 1        | 7        | 0        | 3        | 2        | Bacteria; Chloroflexi; Ktedonobacteria; Thermogemmatisporales; Thermogemmatisporaceae                            |
| Otu2465 | 0        | 0       | 0       | 4       | 0       | 2       | 1        | 1        | 1        | 0        | 0        | 0        | Bacteria; TM6; SJA-4                                                                                             |
| Otu2464 | 0        | 4       | 4       | 4       | 1       | 1       | 2        | 3        | 5        | 1        | 2        | 1        | Bacteria; Verrucomicrobia; Pedosphaerae; Pedosphaerales                                                          |
| Otu2467 | 2        | 1       | 1       | 0       | 1       | 0       | 0        | 0        | 0        | 2        | 0        | 1        | Bacteria; Verrucomicrobia; Spartobacteria; Chthoniobacterales; Chthoniobacteraceae                               |
| Otu2466 | 0        | 0       | 0       | 3       | 0       | 0       | 0        | 0        | 0        | 0        | 4        | 0        | Bacteria; Actinobacteria; Actinobacteria; Actinomycetales; Kineosporiaceae; Kineosporia                          |
| Otu2469 | 0        | 0       | 1       | 0       | 0       | 2       | 1        | 0        | 0        | 0        | 0        | 0        | Bacteria; Proteobacteria; Alphaproteobacteria; Rhodospirillales; Rhodospirillaceae                               |
| Otu2468 | 2        | 0       | 0       | 0       | 0       | 0       | 0        | 0        | 0        | 1        | 1        | 0        | Bacteria                                                                                                         |
| Otu3133 | 1        | 0       | 0       | 0       | 2       | 0       | 0        | 1        | 0        | 0        | 0        | 0        | Bacteria; Verrucomicrobia; Pedosphaerae                                                                          |
| Otu1108 | 2        | 9       | 5       | 12      | 2       | 7       | 16       | 7        | 9        | 9        | 9        | 7        | Bacteria; BRC1; PRR-11                                                                                           |
| Otu3031 | 1        | 1       | 0       | 0       | 0       | 0       | 0        | 0        | 0        | 0        | 0        | 2        | Bacteria; Chloroflexi; TK17                                                                                      |
| Otu3030 | 0        | 0       | 0       | 0       | 0       | 0       | 0        | 0        | 2        | 0        | 0        | 0        | Bacteria; Bacteroidetes; Saprospirae; Saprospirales; Chitinophagaceae                                            |
| Otu3032 | 3        | 2       | 0       | 1       | 1       | 0       | 0        | 2        | 0        | 0        | 1        | 0        | Bacteria; Proteobacteria; Deltaproteobacteria; Myxococcales                                                      |
| Otu3239 | 0        | 0       | 1       | 1       | 0       | 0       | 0        | 1        | 0        | 3        | 2        | 4        | Bacteria; Firmicutes; Bacilli; Bacillales; Thermoactinomycetaceae; Shimazuella                                   |
| Otu3238 | 1        | 0       | 1       | 1       | 0       | 2       | 0        | 2        | 1        | 2        | 2        | 0        | Bacteria; Planctomycetes; Planctomycetia; Gemmatales; Gemmataceae                                                |
| Otu3237 | 0        | 0       | 0       | 0       | 0       | 0       | 0        | 0        | 2        | 0        | 0        | 0        | Bacteria; Proteobacteria                                                                                         |
| Otu3236 | 1        | 2       | 1       | 1       | 1       | 0       | 1        | 1        | 1        | 0        | 2        | 1        | Bacteria                                                                                                         |
| Otu3234 | 15       | 9       | 6       | 19      | 5       | 4       | 12       | 7        | 10       | 10       | 17       | 12       | Bacteria; Bacteroidetes; Saprospirae; Saprospirales; Chitinophagaceae; Sediminibacterium                         |



| #OTU ID | Z31DSO1r | Z31DSO2 | Z31DSO3 | Z31DSO4 | Z31DSO5 | Z31DSO6 | Z31J1DSO1 | Z31J1DSO2 | Z31J1DSO3 | Z31J1DSO4 | Z31J1DSO5 | Z31J1DSO6 | taxonomy                                                                                          |
|---------|----------|---------|---------|---------|---------|---------|-----------|-----------|-----------|-----------|-----------|-----------|---------------------------------------------------------------------------------------------------|
| Otu3233 | 0        | 0       | 0       | 2       | 0       | 0       | 0         | 0         | 0         | 0         | 1         | 0         | Bacteria; Fibrobacteres; Fibrobacteria; 258ds10                                                   |
| Otu3232 | 9        | 10      | 1       | 2       | 0       | 1       | 0         | 0         | 1         | 0         | 4         | 0         | Bacteria; Proteobacteria; Gammaproteobacteria; Xanthomonadales; Xanthomonadaceae                  |
| Otu3231 | 7        | 2       | 7       | 7       | 4       | 17      | 3         | 6         | 11        | 18        | 12        | 10        | Bacteria; Acidobacteria; Acidobacteriia; Acidobacteriales; Koribacteraceae                        |
| Otu3230 | 0        | 2       | 0       | 0       | 0       | 0       | 0         | 0         | 0         | 0         | 0         | 0         | Bacteria; Planctomycetes; Planctomycetia; Pirellulales; Pirellulaceae                             |
| Otu2612 | 2        | 0       | 0       | 0       | 0       | 0       | 0         | 0         | 0         | 0         | 0         | 0         | Bacteria                                                                                          |
| Otu3039 | 0        | 0       | 0       | 0       | 0       | 0       | 0         | 0         | 0         | 0         | 1         | 2         | Bacteria; FBP                                                                                     |
| Otu2688 | 0        | 0       | 0       | 2       | 0       | 0       | 0         | 0         | 0         | 0         | 0         | 0         | Bacteria; Chloroflexi; Ktedonobacteria; Thermogemmatisporales; Thermogemmatisporaceae             |
| Otu3449 | 0        | 0       | 0       | 0       | 0       | 0       | 0         | 0         | 0         | 0         | 3         | 0         | Bacteria; OD1; SM2F11                                                                             |
| Otu2523 | 2        | 4       | 4       | 4       | 0       | 0       | 4         | 0         | 2         | 0         | 1         | 0         | Bacteria; Actinobacteria; Thermoleophilia; Solirubrobacterales                                    |
| Otu2613 | 0        | 0       | 1       | 0       | 0       | 1       | 0         | 0         | 0         | 0         | 3         | 1         | Bacteria; Proteobacteria; Alphaproteobacteria; Rhodospirillales; Acetobacteraceae                 |
| Otu1745 | 0        | 1       | 0       | 1       | 0       | 0       | 4         | 0         | 0         | 1         | 2         | 1         | Bacteria; Firmicutes; Bacilli; Bacillales; Paenibacillaceae; Paenibacillus                        |
| Otu1744 | 0        | 0       | 1       | 3       | 0       | 1       | 1         | 0         | 0         | 3         | 0         | 0         | Bacteria; Proteobacteria; Gammaproteobacteria; Legionellales; Coxiellaceae                        |
| Otu1747 | 3        | 5       | 1       | 0       | 0       | 0       | 1         | 1         | 0         | 3         | 1         | 2         | Bacteria; Proteobacteria; Gammaproteobacteria; Xanthomonadales; Xanthomonadaceae; Lysobacter      |
| Otu1746 | 1        | 0       | 2       | 5       | 0       | 2       | 0         | 6         | 1         | 0         | 1         | 1         | Bacteria; Proteobacteria; Gammaproteobacteria; Xanthomonadales; Xanthomonadaceae                  |
| Otu1741 | 10       | 6       | 3       | 6       | 5       | 1       | 6         | 3         | 2         | 6         | 7         | 2         | Bacteria; Gemmatimonadetes; Gemmatimonadetes; Gemmatimonadales                                    |
| Otu1740 | 0        | 2       | 1       | 4       | 2       | 1       | 0         | 1         | 1         | 1         | 2         | 2         | Bacteria; Elusimicrobia; Elusimicrobia; MVP-88                                                    |
| Otu1743 | 1        | 1       | 1       | 5       | 3       | 0       | 7         | 2         | 3         | 2         | 2         | 0         | Bacteria; Chloroflexi; TK10; B07_WMSP1                                                            |
| Otu1742 | 22       | 11      | 14      | 31      | 14      | 21      | 42        | 31        | 38        | 34        | 18        | 25        | Bacteria; Proteobacteria; Alphaproteobacteria; Sphingomonadales; Sphingomonadaceae                |
| Otu2058 | 3        | 0       | 0       | 0       | 0       | 0       | 0         | 1         | 1         | 1         | 3         | 0         | Bacteria; Planctomycetes; Planctomycetia; Gemmatales; Gemmataceae; Gemmata                        |
| Otu2059 | 23       | 13      | 27      | 32      | 20      | 22      | 35        | 23        | 17        | 35        | 32        | 21        | Bacteria; Acidobacteria; Acidobacteriia; Acidobacteriales; Koribacteraceae; Candidatus_Koribacter |
| Otu1749 | 1        | 3       | 0       | 1       | 2       | 0       | 0         | 0         | 0         | 0         | 5         | 4         | Bacteria; Proteobacteria; Alphaproteobacteria; Rhizobiales; Hyphomicrobiaceae; Parvibaculum       |
| Otu1748 | 2        | 1       | 0       | 1       | 2       | 0       | 4         | 1         | 1         | 2         | 0         | 4         | Bacteria; Proteobacteria; Gammaproteobacteria; Xanthomonadales; Xanthomonadaceae                  |

| #OTU ID | Z31DSO1r | Z31DSO2 | Z31DSO3 | Z31DSO4 | Z31DSO5 | Z31DSO6 | Z31J1DSO1 | Z31J1DSO2 | Z31J1DSO3 | Z31J1DSO4 | Z31J1DSO5 | Z31J1DSO6 | taxonomy                                                                              |
|---------|----------|---------|---------|---------|---------|---------|-----------|-----------|-----------|-----------|-----------|-----------|---------------------------------------------------------------------------------------|
| Otu1987 | 3        | 0       | 0       | 1       | 3       | 1       | 2         | 0         | 2         | 2         | 2         | 1         | Bacteria; Acidobacteria; Solibacteres; Solibacterales                                 |
| Otu1986 | 0        | 0       | 0       | 0       | 1       | 0       | 0         | 0         | 0         | 0         | 3         | 0         | Bacteria; Planctomycetes; Planctomycetia; Gemmatales; Gemmataceae                     |
| Otu1985 | 11       | 2       | 0       | 3       | 0       | 0       | 1         | 0         | 1         | 1         | 0         | 0         | Bacteria; Proteobacteria; Deltaproteobacteria; Myxococcales                           |
| Otu1984 | 1        | 3       | 3       | 4       | 0       | 4       | 4         | 3         | 8         | 2         | 3         | 4         | Bacteria; OP3; PBS-25                                                                 |
| Otu1983 | 2        | 1       | 2       | 0       | 1       | 3       | 0         | 2         | 3         | 0         | 1         | 0         | Bacteria; Proteobacteria; Deltaproteobacteria; Myxococcales                           |
| Otu1982 | 4        | 1       | 1       | 1       | 0       | 0       | 0         | 0         | 0         | 1         | 1         | 1         | Bacteria; Planctomycetes; Phycisphaerae; WD2101                                       |
| Otu1981 | 7        | 4       | 1       | 5       | 4       | 4       | 8         | 4         | 6         | 3         | 6         | 5         | Bacteria; Proteobacteria; Alphaproteobacteria; Sphingomonadales; Sphingomonadaceae    |
| Otu1980 | 0        | 2       | 0       | 0       | 0       | 0       | 1         | 1         | 0         | 0         | 3         | 0         | Bacteria                                                                              |
| Otu2053 | 0        | 0       | 0       | 0       | 1       | 0       | 0         | 0         | 0         | 0         | 4         | 0         | Bacteria; Planctomycetes; Planctomycetia; Gemmatales; Gemmataceae; Gemmata            |
| Otu2298 | 0        | 0       | 0       | 0       | 0       | 0       | 0         | 0         | 0         | 0         | 3         | 0         | Bacteria; Firmicutes; Clostridia; Clostridiales; Lachnospiraceae; Epulopiscium        |
| Otu2299 | 1        | 0       | 0       | 0       | 0       | 0       | 0         | 0         | 0         | 2         | 0         | 0         | Bacteria                                                                              |
| Otu1989 | 0        | 1       | 0       | 4       | 0       | 0       | 1         | 0         | 2         | 2         | 2         | 0         | Bacteria; Verrucomicrobia; Methylacidiphilae; S-BQ2-57                                |
| Otu1988 | 7        | 1       | 4       | 3       | 0       | 1       | 7         | 1         | 2         | 2         | 2         | 3         | Bacteria; Planctomycetes; Phycisphaerae; WD2101                                       |
| Otu3344 | 0        | 2       | 0       | 0       | 0       | 0       | 0         | 0         | 0         | 0         | 0         | 0         | Bacteria                                                                              |
| Otu215  | 22       | 21      | 68      | 21      | 66      | 29      | 48        | 104       | 17        | 13        | 15        | 23        | Bacteria; Firmicutes; Bacilli; Bacillales; Paenibacillaceae; Paenibacillus            |
| Otu2054 | 0        | 0       | 1       | 3       | 1       | 2       | 0         | 0         | 5         | 0         | 5         | 0         | Bacteria; Proteobacteria; Alphaproteobacteria; Rickettsiales                          |
| Otu2611 | 1        | 3       | 1       | 3       | 1       | 3       | 2         | 2         | 2         | 1         | 2         | 0         | Bacteria; Proteobacteria; Deltaproteobacteria; Myxococcales; Polyangiaceae            |
| Otu214  | 62       | 21      | 35      | 45      | 21      | 59      | 59        | 67        | 116       | 52        | 34        | 60        | Bacteria; Acidobacteria; Acidobacteriia; Acidobacteriales; Koribacteraceae            |
| Otu1408 | 1        | 1       | 2       | 5       | 0       | 3       | 8         | 2         | 1         | 3         | 5         | 3         | Bacteria; Chloroflexi; Chloroflexi; AKIW781                                           |
| Otu1409 | 1        | 4       | 1       | 1       | 2       | 0       | 1         | 0         | 0         | 1         | 5         | 3         | Bacteria; Proteobacteria; Deltaproteobacteria; NB1-j; NB1-i                           |
| Otu1402 | 7        | 0       | 2       | 1       | 0       | 3       | 4         | 0         | 0         | 1         | 1         | 2         | Bacteria; Chloroflexi; Ktedonobacteria; JG30-KF-AS9                                   |
| Otu1403 | 0        | 0       | 0       | 0       | 5       | 0       | 2         | 0         | 0         | 2         | 1         | 0         | Bacteria; Proteobacteria; Gammaproteobacteria; Legionellales; Coxiellaceae; Aquicella |

| #OTU ID | Z31DSO1r | Z31DSO2 | Z31DSO3 | Z31DSO4 | Z31DSO5 | Z31DSO6 | Z31J1DSO1 | Z31J1DSO2 | Z31J1DSO3 | Z31J1DSO4 | Z31J1DSO5 | Z31J1DSO6 | taxonomy                                                                                                   |
|---------|----------|---------|---------|---------|---------|---------|-----------|-----------|-----------|-----------|-----------|-----------|------------------------------------------------------------------------------------------------------------|
| Otu1400 | 6        | 1       | 1       | 2       | 2       | 5       | 3         | 5         | 3         | 3         | 1         | 4         | Bacteria; Proteobacteria                                                                                   |
| Otu1401 | 0        | 0       | 1       | 1       | 0       | 0       | 0         | 4         | 0         | 0         | 0         | 0         | Bacteria; Tenericutes; Mollicutes; Anaeroplasmatales; Anaeroplasmataceae; Asteroleplasma                   |
| Otu1406 | 0        | 0       | 0       | 0       | 2       | 0       | 0         | 0         | 0         | 1         | 2         | 7         | Bacteria; Verrucomicrobia; Opitutae; Cerasiococcales; Cerasiococcaceae                                     |
| Otu1407 | 1        | 0       | 6       | 3       | 2       | 2       | 2         | 0         | 1         | 1         | 3         | 0         | Bacteria; Chlamydiae; Chlamydiia; Chlamydiales; Parachlamydiaceae                                          |
| Otu1404 | 0        | 0       | 2       | 2       | 0       | 1       | 1         | 7         | 1         | 0         | 1         | 0         | Bacteria; Planctomycetes; Planctomycetia; Gemmatales; Gemmataceae                                          |
| Otu1405 | 4        | 0       | 0       | 0       | 0       | 0       | 0         | 0         | 0         | 0         | 0         | 0         | Bacteria; Cyanobacteria; Chloroplast; Streptophyta                                                         |
| Otu3142 | 2        | 0       | 0       | 0       | 0       | 1       | 1         | 2         | 2         | 0         | 0         | 0         | Bacteria; Proteobacteria; Alphaproteobacteria; Rhodospirillales; Rhodospirillaceae                         |
| Otu1531 | 3        | 4       | 4       | 5       | 2       | 0       | 0         | 5         | 1         | 6         | 1         | 1         | Bacteria; Planctomycetes; vadinHA49; p04_C01                                                               |
| Otu217  | 72       | 44      | 76      | 70      | 46      | 43      | 43        | 30        | 32        | 47        | 134       | 34        | Bacteria; Verrucomicrobia; Pedosphaerae; Pedosphaerales                                                    |
| Otu2188 | 0        | 2       | 1       | 3       | 0       | 0       | 0         | 0         | 3         | 0         | 0         | 2         | Bacteria; Bacteroidetes; Saprospirae; Saprospirales; Chitinophagaceae                                      |
| Otu2189 | 1        | 0       | 2       | 4       | 0       | 4       | 2         | 6         | 3         | 0         | 2         | 4         | Bacteria; Actinobacteria; Actinobacteria; Actinomycetales                                                  |
| Otu2186 | 2        | 4       | 2       | 0       | 1       | 0       | 4         | 2         | 0         | 5         | 4         | 2         | Bacteria; Actinobacteria; Acidimicrobiia; Acidimicrobiales                                                 |
| Otu2187 | 0        | 2       | 1       | 1       | 4       | 2       | 2         | 3         | 0         | 4         | 2         | 2         | Bacteria; Chlamydiae; Chlamydiia; Chlamydiales                                                             |
| Otu2184 | 0        | 0       | 0       | 3       | 0       | 0       | 1         | 0         | 3         | 3         | 2         | 1         | Bacteria; Proteobacteria; Alphaproteobacteria                                                              |
| Otu2185 | 3        | 0       | 0       | 1       | 0       | 0       | 1         | 0         | 0         | 0         | 0         | 0         | Bacteria; Actinobacteria; Actinobacteria; Actinomycetales; Nocardiaceae; Rhodococcus; Rhodococcus_fascians |
| Otu2182 | 3        | 0       | 0       | 0       | 0       | 0       | 0         | 0         | 0         | 0         | 0         | 0         | Bacteria; Cyanobacteria; Chloroplast; Stramenopiles                                                        |
| Otu2183 | 0        | 1       | 0       | 1       | 0       | 0       | 3         | 0         | 0         | 1         | 1         | 0         | Bacteria; Proteobacteria; Gammaproteobacteria; Xanthomonadales; Sinobacteraceae; Steroidobacter            |
| Otu2180 | 0        | 0       | 0       | 3       | 0       | 0       | 3         | 0         | 0         | 0         | 1         | 0         | Bacteria; Bacteroidetes; Saprospirae; Saprospirales; Chitinophagaceae; Flavisolibacter                     |
| Otu2181 | 0        | 3       | 1       | 0       | 0       | 0       | 2         | 0         | 0         | 0         | 1         | 1         | Bacteria; Proteobacteria; Deltaproteobacteria; Myxococcales                                                |
| Otu1536 | 0        | 0       | 0       | 0       | 0       | 0       | 0         | 1         | 0         | 1         | 3         | 4         | Bacteria; OD1; SM2F11                                                                                      |
| Otu3349 | 196      | 107     | 136     | 229     | 91      | 101     | 167       | 158       | 157       | 121       | 206       | 105       | Bacteria; Acidobacteria; Acidobacteriia; Acidobacteriales; Koribacteraceae                                 |
| Otu216  | 63       | 13      | 13      | 31      | 10      | 48      | 53        | 40        | 37        | 39        | 29        | 29        | Bacteria; Chloroflexi; Ktedonobacteria; JG30-KF-AS9                                                        |

| #OTU ID | Z31DSO1r | Z31DSO2 | Z31DSO3 | Z31DSO4 | Z31DSO5 | Z31DSO6 | Z31J1DSO1 | Z31J1DSO2 | Z31J1DSO3 | Z31J1DSO4 | Z31J1DSO5 | Z31J1DSO6 | taxonomy                                                                                                            |
|---------|----------|---------|---------|---------|---------|---------|-----------|-----------|-----------|-----------|-----------|-----------|---------------------------------------------------------------------------------------------------------------------|
| Otu1576 | 0        | 1       | 3       | 2       | 1       | 0       | 0         | 1         | 0         | 0         | 10        | 0         | Bacteria; Bacteroidetes; Sphingobacteriia; Sphingobacteriales; Sphingobacteriaceae; Solitalea; Solitalea_canadensis |
| Otu1577 | 0        | 4       | 2       | 2       | 0       | 0       | 0         | 0         | 0         | 0         | 0         | 0         | Bacteria; Acidobacteria; BPC102                                                                                     |
| Otu1574 | 4        | 7       | 3       | 1       | 1       | 0       | 1         | 0         | 0         | 3         | 3         | 1         | Bacteria; Chloroflexi; Chloroflexi; Roseiflexales                                                                   |
| Otu1575 | 6        | 1       | 1       | 0       | 0       | 0       | 0         | 0         | 0         | 0         | 0         | 0         | Bacteria; Planctomycetes; Planctomycetia; Pirellulales; Pirellulaceae                                               |
| Otu1572 | 1        | 1       | 0       | 2       | 4       | 0       | 1         | 1         | 0         | 2         | 1         | 1         | Bacteria; Planctomycetes; Planctomycetia; Planctomycetales; Planctomycetaceae; Planctomyces                         |
| Otu1573 | 0        | 0       | 0       | 0       | 0       | 2       | 1         | 0         | 5         | 0         | 0         | 0         | Bacteria; Chlamydiae; Chlamydia; Chlamydiales                                                                       |
| Otu1570 | 3        | 0       | 3       | 5       | 1       | 3       | 6         | 5         | 4         | 3         | 7         | 3         | Bacteria; Verrucomicrobia; Spartobacteria; Chthoniobacteriales; Chthoniobacteraceae                                 |
| Otu1571 | 1        | 0       | 1       | 1       | 0       | 3       | 1         | 5         | 0         | 2         | 2         | 1         | Bacteria; Acidobacteria; DA052; Ellin6513                                                                           |
| Otu1578 | 1        | 0       | 0       | 3       | 4       | 1       | 3         | 1         | 1         | 1         | 2         | 0         | Bacteria; Chloroflexi; Thermomicrobia                                                                               |
| Otu1579 | 0        | 2       | 1       | 0       | 4       | 0       | 1         | 1         | 1         | 0         | 5         | 0         | Bacteria; Chloroflexi; Anaerolineae; Caldilineales; Caldilineaceae                                                  |
| Otu2057 | 0        | 0       | 0       | 1       | 0       | 2       | 0         | 1         | 3         | 1         | 0         | 0         | Bacteria; Chlamydiae; Chlamydia; Chlamydiales                                                                       |
| Otu2987 | 0        | 1       | 0       | 2       | 0       | 0       | 0         | 1         | 0         | 0         | 0         | 0         | Bacteria; Proteobacteria                                                                                            |
| Otu2984 | 0        | 0       | 0       | 1       | 1       | 0       | 0         | 0         | 0         | 2         | 2         | 0         | Bacteria; Chloroflexi; TK10                                                                                         |
| Otu2985 | 2        | 0       | 0       | 3       | 1       | 1       | 0         | 0         | 0         | 1         | 1         | 1         | Bacteria; Gemmatimonadetes; Gemmatimonadetes; N1423WL                                                               |
| Otu2982 | 1        | 0       | 0       | 2       | 0       | 1       | 0         | 0         | 0         | 1         | 0         | 0         | Bacteria                                                                                                            |
| Otu2983 | 2        | 5       | 4       | 1       | 1       | 3       | 3         | 1         | 1         | 3         | 2         | 3         | Bacteria; Proteobacteria; Gammaproteobacteria; Xanthomonadales; Sinobacteraceae                                     |
| Otu2980 | 3        | 0       | 0       | 1       | 1       | 0       | 0         | 1         | 0         | 1         | 3         | 0         | Bacteria; Verrucomicrobia; Spartobacteria; Chthoniobacteriales; Chthoniobacteraceae; Candidatus_Xiphinematobacter   |
| Otu2981 | 1        | 1       | 1       | 0       | 3       | 1       | 2         | 1         | 1         | 1         | 2         | 2         | Bacteria; Proteobacteria; Alphaproteobacteria; Rickettsiales; mitochondria                                          |
| Otu3348 | 0        | 0       | 0       | 0       | 0       | 0       | 0         | 0         | 2         | 0         | 0         | 0         | Bacteria; OD1; ZB2                                                                                                  |
| Otu211  | 44       | 35      | 50      | 26      | 28      | 12      | 40        | 9         | 16        | 15        | 80        | 15        | Bacteria; Chloroflexi; Chloroflexi; Roseiflexales; Kouleothrixaceae                                                 |
| Otu2988 | 2        | 1       | 2       | 0       | 0       | 0       | 2         | 0         | 0         | 0         | 6         | 2         | Bacteria; Bacteroidetes; Sphingobacteriia; Sphingobacteriales                                                       |
| Otu2989 | 1        | 1       | 1       | 0       | 2       | 1       | 0         | 0         | 2         | 0         | 2         | 0         | Bacteria; Acidobacteria; Solibacteres; Solibacteriales; Solibacteraceae; Candidatus_Solibacter                      |

| #OTU ID | Z31DSO1r | Z31DSO2 | Z31DSO3 | Z31DSO4 | Z31DSO5 | Z31DSO6 | Z31JDSO1 | Z31JDSO2 | Z31JDSO3 | Z31JDSO4 | Z31JDSO5 | Z31JDSO6 | taxonomy                                                                                            |
|---------|----------|---------|---------|---------|---------|---------|----------|----------|----------|----------|----------|----------|-----------------------------------------------------------------------------------------------------|
| Otu1534 | 5        | 0       | 4       | 0       | 1       | 0       | 0        | 0        | 0        | 0        | 1        | 0        | Bacteria; Proteobacteria; Alphaproteobacteria; Sphingomonadales; Sphingomonadaceae; Sphingobium     |
| Otu210  | 8        | 4       | 18      | 14      | 17      | 3       | 70       | 3        | 17       | 6        | 4        | 6        | Bacteria; Proteobacteria; Betaproteobacteria; Rhodocyclales; Rhodocyclaceae                         |
| Otu213  | 65       | 9       | 3       | 10      | 1       | 2       | 18       | 11       | 1        | 1        | 5        | 1        | Bacteria; Proteobacteria; Alphaproteobacteria; Rickettsiales; mitochondria; Lupinus; Lupinus_luteus |
| Otu2872 | 7        | 2       | 8       | 10      | 2       | 10      | 14       | 6        | 12       | 8        | 12       | 7        | Bacteria; Actinobacteria; Actinobacteria; Actinomycetales                                           |
| Otu2873 | 0        | 1       | 1       | 2       | 0       | 0       | 0        | 0        | 0        | 0        | 0        | 1        | Bacteria; Bacteroidetes; Cytophagia; Cytophagales; Cytophagaceae; Spirosoma                         |
| Otu2870 | 3        | 0       | 0       | 1       | 0       | 2       | 0        | 0        | 0        | 3        | 1        | 3        | Bacteria; Proteobacteria; Alphaproteobacteria; Sphingomonadales; Sphingomonadaceae; Sphingomonas    |
| Otu2871 | 4        | 1       | 0       | 0       | 1       | 0       | 0        | 0        | 0        | 0        | 0        | 2        | Bacteria; Proteobacteria; Alphaproteobacteria                                                       |
| Otu2876 | 0        | 0       | 0       | 2       | 0       | 0       | 0        | 0        | 0        | 0        | 0        | 0        | Bacteria; Planctomycetes; Planctomycetia; Gemmatales; Gemmataceae; Gemmata                          |
| Otu2877 | 3        | 0       | 0       | 2       | 0       | 0       | 2        | 0        | 2        | 1        | 0        | 0        | Bacteria; FBP                                                                                       |
| Otu2874 | 2        | 2       | 0       | 4       | 0       | 0       | 0        | 1        | 0        | 0        | 0        | 0        | Bacteria; Verrucomicrobia; Spartobacteria; Chthoniobacteriales; Chthoniobacteraceae                 |
| Otu2875 | 0        | 0       | 2       | 1       | 0       | 0       | 0        | 3        | 5        | 0        | 0        | 0        | Bacteria; Proteobacteria; Gammaproteobacteria; Legionellales; Coxiellaceae; Aquicella               |
| Otu2878 | 4        | 0       | 2       | 1       | 1       | 1       | 1        | 0        | 1        | 3        | 1        | 0        | Bacteria; Armatimonadetes; 0319-6E2                                                                 |
| Otu2879 | 3        | 0       | 0       | 0       | 0       | 0       | 0        | 0        | 1        | 0        | 0        | 0        | Bacteria                                                                                            |
| Otu2728 | 2        | 1       | 3       | 5       | 3       | 2       | 4        | 3        | 5        | 1        | 6        | 0        | Bacteria; Planctomycetes; Planctomycetia; Pirellulales; Pirellulaceae; A17                          |
| Otu2729 | 0        | 1       | 0       | 0       | 0       | 1       | 0        | 1        | 2        | 0        | 0        | 0        | Bacteria                                                                                            |
| Otu212  | 69       | 10      | 7       | 1       | 1       | 0       | 2        | 0        | 0        | 1        | 12       | 2        | Bacteria; Bacteroidetes; Sphingobacteriia; Sphingobacteriales                                       |
| Otu2722 | 0        | 7       | 1       | 0       | 0       | 0       | 3        | 2        | 0        | 0        | 4        | 0        | Bacteria; TM7; TM7-1                                                                                |
| Otu2723 | 3        | 0       | 0       | 0       | 1       | 0       | 3        | 1        | 0        | 0        | 4        | 0        | Bacteria; Proteobacteria; Alphaproteobacteria; Rhodospirillales; Rhodospirillaceae                  |
| Otu2720 | 0        | 2       | 0       | 0       | 0       | 0       | 0        | 0        | 0        | 0        | 0        | 0        | Bacteria; Chloroflexi; Anaerolineae                                                                 |
| Otu2721 | 0        | 0       | 0       | 0       | 4       | 1       | 0        | 0        | 0        | 0        | 1        | 0        | Bacteria; Tenericutes; Mollicutes; Anaeroplasmatales; Anaeroplasmataceae; Asteroleplasma            |
| Otu2726 | 0        | 0       | 1       | 2       | 2       | 1       | 0        | 0        | 0        | 4        | 1        | 0        | Bacteria; Acidobacteria; Solibacteres; Solibacteriales                                              |
| Otu2727 | 1        | 2       | 0       | 0       | 0       | 1       | 0        | 2        | 2        | 1        | 0        | 0        | Bacteria; Proteobacteria; Deltaproteobacteria; Bdellovibrionales; Bdellovibrionaceae; Bdellovibrio  |

| #OTU ID | Z31DSO1r | Z31DSO2 | Z31DSO3 | Z31DSO4 | Z31DSO5 | Z31DSO6 | Z31J1DSO1 | Z31J1DSO2 | Z31J1DSO3 | Z31J1DSO4 | Z31J1DSO5 | Z31J1DSO6 | taxonomy                                                                                                |
|---------|----------|---------|---------|---------|---------|---------|-----------|-----------|-----------|-----------|-----------|-----------|---------------------------------------------------------------------------------------------------------|
| Otu2724 | 0        | 1       | 0       | 0       | 0       | 3       | 0         | 1         | 0         | 0         | 0         | 1         | Bacteria; Proteobacteria; Gammaproteobacteria; Legionellales                                            |
| Otu2725 | 0        | 0       | 0       | 0       | 0       | 0       | 0         | 1         | 2         | 0         | 1         | 1         | Bacteria; Proteobacteria                                                                                |
| Otu3255 | 0        | 0       | 0       | 0       | 0       | 0       | 0         | 0         | 0         | 0         | 2         | 0         | Bacteria; Proteobacteria; Alphaproteobacteria; Rickettsiales; mitochondria                              |
| Otu3254 | 0        | 0       | 2       | 3       | 0       | 0       | 0         | 0         | 0         | 2         | 15        | 0         | Bacteria; Bacteroidetes; Sphingobacteriia; Sphingobacteriales; Sphingobacteriaceae                      |
| Otu2618 | 0        | 2       | 0       | 0       | 0       | 0       | 0         | 0         | 0         | 0         | 0         | 0         | Bacteria; Chloroflexi; Anaerolineae; H39                                                                |
| Otu3257 | 2        | 0       | 0       | 0       | 0       | 0       | 0         | 0         | 0         | 0         | 0         | 0         | Bacteria; Proteobacteria; Alphaproteobacteria                                                           |
| Otu2161 | 7        | 1       | 5       | 3       | 2       | 6       | 3         | 3         | 2         | 0         | 9         | 4         | Bacteria; Firmicutes; Clostridia; Clostridiales; Clostridiaceae; Clostridium                            |
| Otu3256 | 2        | 0       | 0       | 0       | 1       | 1       | 0         | 0         | 0         | 0         | 1         | 0         | Bacteria; TM7; TM7-1                                                                                    |
| Otu1198 | 6        | 5       | 2       | 2       | 5       | 4       | 2         | 1         | 2         | 2         | 7         | 2         | Bacteria; Gemmatimonadetes; Gemm-5                                                                      |
| Otu1199 | 0        | 5       | 3       | 2       | 7       | 1       | 5         | 2         | 1         | 0         | 2         | 3         | Bacteria; Chloroflexi; Anaerolineae; GCA004                                                             |
| Otu1194 | 10       | 3       | 12      | 20      | 6       | 14      | 22        | 14        | 19        | 5         | 22        | 2         | Bacteria; Actinobacteria; Actinobacteria; Actinomycetales; Frankiaceae                                  |
| Otu1195 | 6        | 12      | 2       | 3       | 10      | 0       | 3         | 1         | 1         | 0         | 12        | 0         | Bacteria; Chloroflexi; Anaerolineae; GCA004                                                             |
| Otu1197 | 2        | 0       | 0       | 0       | 1       | 0       | 1         | 0         | 1         | 0         | 2         | 6         | Bacteria; Proteobacteria; Gammaproteobacteria; Legionellales                                            |
| Otu1190 | 0        | 5       | 7       | 2       | 2       | 1       | 3         | 2         | 1         | 1         | 8         | 1         | Bacteria; Chloroflexi; Chloroflexi; Roseiflexales; Kouleothrixaceae                                     |
| Otu1191 | 3        | 7       | 8       | 7       | 2       | 1       | 13        | 5         | 5         | 1         | 9         | 16        | Bacteria; Firmicutes; Bacilli; Bacillales; Paenibacillaceae; Paenibacillus; Paenibacillus_chondroitinus |
| Otu1192 | 2        | 2       | 1       | 7       | 4       | 0       | 4         | 1         | 3         | 0         | 8         | 1         | Bacteria; Bacteroidetes; Saprospirae; Saprospirales; Chitinophagaceae                                   |
| Otu1193 | 1        | 5       | 2       | 3       | 2       | 2       | 10        | 0         | 0         | 0         | 5         | 0         | Bacteria; Proteobacteria; Alphaproteobacteria; Rhizobiales; Hyphomicrobiaceae; Rhodoplanes              |
| Otu3253 | 1        | 0       | 1       | 3       | 2       | 6       | 2         | 1         | 2         | 1         | 3         | 0         | Bacteria; Verrucomicrobia; Pedosphaerae; Pedosphaerales                                                 |
| Otu1358 | 2        | 6       | 3       | 6       | 4       | 3       | 4         | 6         | 6         | 7         | 8         | 4         | Bacteria; Verrucomicrobia; Pedosphaerae; Pedosphaerales; Ellin517                                       |
| Otu1359 | 10       | 2       | 2       | 4       | 2       | 1       | 5         | 1         | 1         | 3         | 4         | 1         | Bacteria                                                                                                |
| Otu1356 | 0        | 0       | 0       | 0       | 5       | 0       | 0         | 0         | 0         | 0         | 1         | 0         | Bacteria; Verrucomicrobia; Pedosphaerae; Pedosphaerales; Ellin517                                       |
| Otu1357 | 6        | 1       | 4       | 5       | 2       | 4       | 9         | 3         | 4         | 5         | 3         | 2         | Bacteria; Planctomycetes; Phycisphaerae; WD2101                                                         |

| #OTU ID | Z31DSO1r | Z31DSO2 | Z31DSO3 | Z31DSO4 | Z31DSO5 | Z31DSO6 | Z31J1DSO1 | Z31J1DSO2 | Z31J1DSO3 | Z31J1DSO4 | Z31J1DSO5 | Z31J1DSO6 | taxonomy                                                                                            |
|---------|----------|---------|---------|---------|---------|---------|-----------|-----------|-----------|-----------|-----------|-----------|-----------------------------------------------------------------------------------------------------|
| Otu1354 | 8        | 2       | 3       | 2       | 4       | 0       | 1         | 0         | 1         | 0         | 5         | 0         | Bacteria; Proteobacteria; Betaproteobacteria; Burkholderiales; Alcaligenaceae                       |
| Otu1355 | 2        | 0       | 3       | 1       | 5       | 3       | 0         | 0         | 0         | 4         | 7         | 1         | Bacteria; Gemmatimonadetes; Gemmatimonadetes; Ellin5290                                             |
| Otu1352 | 0        | 2       | 0       | 2       | 1       | 1       | 0         | 0         | 3         | 6         | 4         | 1         | Bacteria; Bacteroidetes; Sphingobacteriia; Sphingobacteriales                                       |
| Otu1353 | 11       | 2       | 8       | 17      | 4       | 2       | 4         | 0         | 4         | 5         | 11        | 0         | Bacteria; Proteobacteria; Deltaproteobacteria; Myxococcales; Polyangiaceae                          |
| Otu1350 | 0        | 1       | 4       | 3       | 2       | 0       | 7         | 4         | 0         | 7         | 1         | 9         | Bacteria; Proteobacteria; Gammaproteobacteria; Legionellales; Coxiellaceae; Aquicella               |
| Otu1351 | 0        | 0       | 1       | 2       | 2       | 0       | 0         | 0         | 1         | 6         | 6         | 0         | Bacteria; Proteobacteria; Gammaproteobacteria; Legionellales; Coxiellaceae                          |
| Otu2162 | 2        | 1       | 1       | 4       | 1       | 5       | 4         | 1         | 3         | 1         | 0         | 3         | Bacteria; Proteobacteria; Deltaproteobacteria; Myxococcales                                         |
| Otu2454 | 3        | 0       | 2       | 2       | 0       | 0       | 3         | 1         | 2         | 0         | 1         | 1         | Bacteria; Proteobacteria; Alphaproteobacteria; Rickettsiales                                        |
| Otu2614 | 2        | 0       | 0       | 0       | 0       | 0       | 0         | 0         | 0         | 0         | 0         | 0         | Bacteria; Proteobacteria; Deltaproteobacteria; Myxococcales                                         |
| Otu2615 | 3        | 0       | 2       | 0       | 1       | 0       | 3         | 2         | 0         | 1         | 0         | 2         | Bacteria; Planctomycetes; Planctomycetia; Gemmatales; Gemmataceae; Gemmata                          |
| Otu329  | 11       | 63      | 19      | 6       | 22      | 5       | 4         | 2         | 2         | 3         | 17        | 2         | Bacteria; Acidobacteria; Chloracidobacteria; 11-24                                                  |
| Otu328  | 58       | 48      | 35      | 49      | 34      | 25      | 56        | 16        | 41        | 33        | 99        | 24        | Bacteria; Actinobacteria; Thermoleophilina; Gaiellales; Gaiellaceae                                 |
| Otu499  | 3        | 1       | 10      | 7       | 7       | 1       | 19        | 10        | 5         | 9         | 7         | 0         | Bacteria; Chlamydiae; Chlamydia; Chlamydiales                                                       |
| Otu498  | 14       | 3       | 5       | 14      | 1       | 5       | 6         | 18        | 21        | 3         | 6         | 4         | Bacteria; Gemmatimonadetes; Gemmatimonadetes; Ellin5290                                             |
| Otu497  | 0        | 3       | 19      | 3       | 0       | 1       | 1         | 0         | 0         | 1         | 1         | 0         | Bacteria; Proteobacteria; Alphaproteobacteria                                                       |
| Otu496  | 28       | 20      | 21      | 22      | 12      | 9       | 33        | 11        | 18        | 16        | 20        | 12        | Bacteria; Verrucomicrobia; Spartobacteria; Chthoniobacteriales; Chthoniobacteraceae; Chthoniobacter |
| Otu495  | 21       | 19      | 32      | 40      | 5       | 10      | 25        | 24        | 41        | 33        | 7         | 46        | Bacteria; Bacteroidetes; Saprospirae; Saprospirales; Chitinophagaceae                               |
| Otu494  | 40       | 13      | 17      | 22      | 22      | 4       | 7         | 0         | 5         | 28        | 24        | 12        | Bacteria; Bacteroidetes; Sphingobacteriia; Sphingobacteriales                                       |
| Otu493  | 1        | 0       | 2       | 3       | 3       | 0       | 0         | 0         | 3         | 19        | 2         | 6         | Bacteria; Proteobacteria; Gammaproteobacteria                                                       |
| Otu492  | 4        | 1       | 3       | 1       | 0       | 0       | 7         | 5         | 4         | 3         | 20        | 6         | Bacteria; Gemmatimonadetes; Gemm-3                                                                  |
| Otu491  | 45       | 29      | 18      | 12      | 9       | 9       | 22        | 14        | 11        | 12        | 45        | 7         | Bacteria; Chloroflexi; Ellin6529                                                                    |
| Otu490  | 25       | 20      | 13      | 11      | 5       | 2       | 8         | 4         | 4         | 17        | 13        | 5         | Bacteria; Acidobacteria; Acidobacteria-5                                                            |

| #OTU ID | Z31DSO1r | Z31DSO2 | Z31DSO3 | Z31DSO4 | Z31DSO5 | Z31DSO6 | Z31JDSO1 | Z31JDSO2 | Z31JDSO3 | Z31JDSO4 | Z31JDSO5 | Z31JDSO6 | taxonomy                                                                                           |
|---------|----------|---------|---------|---------|---------|---------|----------|----------|----------|----------|----------|----------|----------------------------------------------------------------------------------------------------|
| Otu1753 | 0        | 0       | 0       | 0       | 0       | 1       | 3        | 0        | 1        | 0        | 1        | 2        | Bacteria; Proteobacteria; Deltaproteobacteria; Bdellovibrionales; Bdellovibrionaceae; Bdellovibrio |
| Otu2769 | 0        | 0       | 3       | 0       | 0       | 0       | 0        | 0        | 0        | 0        | 2        | 1        | Bacteria; Proteobacteria; Deltaproteobacteria; Myxococcales; Cystobacterineae                      |
| Otu1118 | 0        | 0       | 1       | 0       | 0       | 0       | 0        | 0        | 1        | 0        | 0        | 7        | Bacteria; Proteobacteria; Gammaproteobacteria; Legionellales                                       |
| Otu927  | 2        | 0       | 2       | 3       | 0       | 9       | 0        | 5        | 4        | 3        | 2        | 2        | Bacteria; Elusimicrobia; Elusimicrobia; FAC88                                                      |
| Otu926  | 4        | 0       | 2       | 3       | 2       | 1       | 2        | 1        | 1        | 10       | 8        | 9        | Bacteria; Proteobacteria; Alphaproteobacteria                                                      |
| Otu925  | 2        | 5       | 9       | 1       | 5       | 0       | 2        | 0        | 0        | 0        | 1        | 0        | Bacteria; Acidobacteria; Acidobacteria-6; CCU21                                                    |
| Otu924  | 0        | 1       | 1       | 0       | 2       | 0       | 0        | 2        | 0        | 21       | 1        | 5        | Bacteria; Proteobacteria; Gammaproteobacteria; Legionellales; Coxiellaceae                         |
| Otu923  | 0        | 1       | 0       | 6       | 0       | 0       | 0        | 0        | 1        | 1        | 3        | 8        | Bacteria; Verrucomicrobia; Opitutae; Opitiales; Opitutaceae; Opitutus                              |
| Otu922  | 0        | 4       | 4       | 3       | 4       | 2       | 9        | 4        | 8        | 7        | 9        | 4        | Bacteria; Chlamydiae; Chlamydia; Chlamydiales                                                      |
| Otu921  | 5        | 4       | 5       | 9       | 5       | 2       | 9        | 4        | 5        | 4        | 11       | 2        | Bacteria; Actinobacteria; Thermoleophilia; Solirubrobacterales                                     |
| Otu920  | 13       | 3       | 1       | 0       | 3       | 1       | 1        | 0        | 1        | 5        | 0        | 1        | Bacteria                                                                                           |
| Otu141  | 86       | 102     | 223     | 189     | 129     | 184     | 234      | 71       | 86       | 59       | 258      | 73       | Bacteria; Actinobacteria; Actinobacteria; Actinomycetales; Intrasporangiaceae                      |
| Otu140  | 90       | 216     | 223     | 267     | 179     | 255     | 168      | 215      | 115      | 151      | 149      | 84       | Bacteria; Chloroflexi; Anaerolineae; SBR1031; A4b                                                  |
| Otu143  | 49       | 53      | 64      | 55      | 21      | 17      | 117      | 34       | 38       | 27       | 49       | 26       | Bacteria; Proteobacteria; Alphaproteobacteria; Sphingomonadales; Sphingomonadaceae; Sphingomonas   |
| Otu142  | 172      | 61      | 54      | 126     | 25      | 91      | 129      | 122      | 128      | 76       | 49       | 164      | Bacteria; Proteobacteria; Gammaproteobacteria; Xanthomonadales; Xanthomonadaceae                   |
| Otu145  | 352      | 127     | 92      | 173     | 99      | 60      | 93       | 83       | 106      | 108      | 180      | 65       | Bacteria; Acidobacteria; iii1-8; DS-18                                                             |
| Otu1119 | 3        | 0       | 0       | 2       | 0       | 2       | 0        | 0        | 0        | 8        | 1        | 0        | Bacteria; Gemmatimonadetes; Gemmatimonadetes; Ellin5290                                            |
| Otu929  | 21       | 4       | 4       | 12      | 7       | 5       | 7        | 3        | 6        | 11       | 12       | 10       | Bacteria; Proteobacteria; Deltaproteobacteria; Myxococcales; Myxococcaceae                         |
| Otu928  | 25       | 18      | 13      | 13      | 8       | 10      | 18       | 13       | 12       | 10       | 14       | 14       | Bacteria; Proteobacteria; Alphaproteobacteria; Caulobacterales; Caulobacteraceae                   |
| Otu2502 | 0        | 0       | 0       | 0       | 0       | 1       | 1        | 0        | 3        | 1        | 2        | 0        | Bacteria; Chloroflexi                                                                              |
| Otu2503 | 0        | 0       | 0       | 0       | 0       | 0       | 2        | 0        | 0        | 0        | 0        | 0        | Bacteria                                                                                           |
| Otu2500 | 0        | 1       | 1       | 0       | 0       | 0       | 0        | 0        | 0        | 0        | 2        | 0        | Bacteria; Armatimonadetes; 0319-6E2                                                                |



| #OTU ID | Z31DSO1r | Z31DSO2 | Z31DSO3 | Z31DSO4 | Z31DSO5 | Z31DSO6 | Z31JDSO1 | Z31JDSO2 | Z31JDSO3 | Z31JDSO4 | Z31JDSO5 | Z31JDSO6 | taxonomy                                                                                                                       |
|---------|----------|---------|---------|---------|---------|---------|----------|----------|----------|----------|----------|----------|--------------------------------------------------------------------------------------------------------------------------------|
| Otu2501 | 2        | 0       | 2       | 2       | 2       | 0       | 0        | 1        | 0        | 2        | 3        | 2        | Bacteria; Proteobacteria; Deltaproteobacteria; Bdellovibrionales; Bdellovibrionaceae; Bdellovibrio; Bdellovibrio_bacteriovorus |
| Otu2506 | 0        | 0       | 0       | 1       | 1       | 2       | 0        | 6        | 0        | 5        | 2        | 1        | Bacteria; Proteobacteria; Alphaproteobacteria                                                                                  |
| Otu2507 | 1        | 1       | 0       | 0       | 0       | 6       | 0        | 0        | 0        | 0        | 1        | 0        | Bacteria; Chloroflexi; Anaerolineae; CFB-26                                                                                    |
| Otu2504 | 0        | 0       | 0       | 2       | 2       | 0       | 0        | 1        | 1        | 1        | 0        | 0        | Bacteria; Chloroflexi; Chloroflexi; Roseiflexales                                                                              |
| Otu2505 | 2        | 1       | 4       | 1       | 4       | 1       | 1        | 0        | 1        | 0        | 5        | 2        | Bacteria; Acidobacteria; Solibacteres; Solibacterales                                                                          |
| Otu2508 | 0        | 0       | 2       | 2       | 0       | 3       | 3        | 0        | 1        | 0        | 4        | 0        | Bacteria; Firmicutes; Bacilli; Bacillales; Bacillaceae                                                                         |
| Otu2509 | 4        | 8       | 8       | 5       | 5       | 3       | 4        | 2        | 1        | 5        | 0        | 2        | Bacteria; Acidobacteria; Acidobacteria-5                                                                                       |
| Otu3059 | 17       | 8       | 5       | 5       | 6       | 6       | 15       | 3        | 3        | 8        | 13       | 10       | Bacteria; Proteobacteria; Alphaproteobacteria; Sphingomonadales                                                                |
| Otu3058 | 0        | 0       | 0       | 0       | 1       | 0       | 0        | 0        | 2        | 1        | 0        | 0        | Bacteria; Proteobacteria; Alphaproteobacteria; BD7-3                                                                           |
| Otu3053 | 2        | 1       | 0       | 2       | 0       | 1       | 1        | 0        | 2        | 1        | 1        | 0        | Bacteria; Armatimonadetes; Armatimonadia; Armatimonadales; Armatimonadaceae                                                    |
| Otu3052 | 2        | 0       | 0       | 3       | 1       | 0       | 0        | 1        | 2        | 1        | 1        | 0        | Bacteria; OP3; PBS-25                                                                                                          |
| Otu3051 | 0        | 0       | 2       | 0       | 0       | 0       | 0        | 0        | 0        | 1        | 1        | 0        | Bacteria; Chlamydiae; Chlamydiai; Chlamydiales; Parachlamydiaceae                                                              |
| Otu3050 | 0        | 0       | 0       | 1       | 0       | 0       | 2        | 0        | 2        | 2        | 0        | 0        | Bacteria; Planctomycetes; Planctomycetia; Gemmatales; Gemmataceae; Gemmata                                                     |
| Otu3057 | 0        | 0       | 1       | 2       | 1       | 0       | 0        | 1        | 1        | 0        | 2        | 0        | Bacteria                                                                                                                       |
| Otu3056 | 0        | 0       | 1       | 0       | 0       | 1       | 0        | 0        | 2        | 0        | 0        | 0        | Bacteria; OD1; Mb-NB09                                                                                                         |
| Otu3055 | 0        | 0       | 1       | 2       | 0       | 0       | 0        | 0        | 0        | 0        | 0        | 0        | Bacteria; Proteobacteria; Deltaproteobacteria; Myxococcales                                                                    |
| Otu3054 | 10       | 4       | 4       | 3       | 6       | 1       | 3        | 1        | 2        | 0        | 5        | 1        | Bacteria; Chloroflexi; Chloroflexi; Roseiflexales; Kouleothrixaceae                                                            |
| Otu3279 | 0        | 0       | 0       | 1       | 0       | 1       | 1        | 3        | 0        | 2        | 1        | 0        | Bacteria; Planctomycetes; Planctomycetia; Gemmatales; Gemmataceae                                                              |
| Otu1978 | 3        | 0       | 0       | 0       | 0       | 0       | 3        | 0        | 2        | 1        | 1        | 1        | Bacteria; Firmicutes; Bacilli; Bacillales; Paenibacillaceae; Brevibacillus                                                     |
| Otu1979 | 4        | 0       | 2       | 0       | 0       | 1       | 2        | 0        | 0        | 0        | 2        | 5        | Bacteria; Chloroflexi; TK10; B07_WMSP1                                                                                         |
| Otu1972 | 10       | 5       | 1       | 7       | 0       | 0       | 0        | 0        | 0        | 1        | 0        | 1        | Bacteria; Bacteroidetes; Cytophagia; Cytophagales; Cytophagaceae                                                               |
| Otu1973 | 4        | 0       | 0       | 1       | 0       | 1       | 0        | 0        | 0        | 0        | 0        | 0        | Bacteria; Proteobacteria; Deltaproteobacteria; Bdellovibrionales; Bdellovibrionaceae; Bdellovibrio                             |

| #OTU ID | Z31DSO1r | Z31DSO2 | Z31DSO3 | Z31DSO4 | Z31DSO5 | Z31DSO6 | Z31JDSO1 | Z31JDSO2 | Z31JDSO3 | Z31JDSO4 | Z31JDSO5 | Z31JDSO6 | taxonomy                                                                               |
|---------|----------|---------|---------|---------|---------|---------|----------|----------|----------|----------|----------|----------|----------------------------------------------------------------------------------------|
| Otu1970 | 3        | 1       | 0       | 0       | 0       | 0       | 0        | 1        | 0        | 0        | 0        | 0        | Bacteria; Proteobacteria; Deltaproteobacteria; Myxococcales                            |
| Otu1971 | 0        | 0       | 0       | 0       | 0       | 3       | 2        | 1        | 2        | 0        | 0        | 0        | Bacteria                                                                               |
| Otu1976 | 1        | 1       | 1       | 3       | 3       | 0       | 3        | 0        | 1        | 3        | 5        | 1        | Bacteria; Bacteroidetes; Saprospirae; Saprospirales; Chitinophagaceae                  |
| Otu1977 | 0        | 0       | 0       | 2       | 1       | 1       | 4        | 1        | 3        | 2        | 0        | 1        | Bacteria; Planctomycetes; Planctomycetia; Gemmatales; Gemmataceae                      |
| Otu1974 | 5        | 0       | 0       | 0       | 0       | 0       | 0        | 1        | 0        | 0        | 0        | 1        | Bacteria; Bacteroidetes; Saprospirae; Saprospirales; Chitinophagaceae                  |
| Otu1975 | 0        | 1       | 2       | 0       | 3       | 0       | 0        | 0        | 0        | 0        | 0        | 0        | Bacteria; Chloroflexi; Anaerolineae; SBR1031; oc28                                     |
| Otu813  | 7        | 3       | 6       | 8       | 3       | 3       | 14       | 9        | 10       | 14       | 4        | 9        | Bacteria; Acidobacteria; Solibacteres; Solibacterales; Solibacteraceae                 |
| Otu812  | 2        | 3       | 8       | 5       | 3       | 19      | 10       | 16       | 16       | 12       | 6        | 11       | Bacteria; Verrucomicrobia; Pedosphaerae; Pedosphaerales                                |
| Otu811  | 5        | 1       | 23      | 0       | 8       | 1       | 2        | 19       | 14       | 2        | 0        | 1        | Bacteria; Verrucomicrobia; Opiritae; Opiritales; Opiritaceae; Opiritus                 |
| Otu810  | 11       | 6       | 1       | 2       | 2       | 1       | 4        | 5        | 1        | 4        | 3        | 0        | Bacteria                                                                               |
| Otu817  | 19       | 1       | 2       | 4       | 3       | 7       | 1        | 2        | 2        | 2        | 4        | 1        | Bacteria; Planctomycetes; Phycisphaerae; CPLa-3                                        |
| Otu816  | 3        | 13      | 5       | 3       | 4       | 2       | 6        | 2        | 3        | 5        | 12       | 1        | Bacteria; Chloroflexi; Chloroflexi; Roseiflexales                                      |
| Otu815  | 11       | 3       | 7       | 11      | 6       | 4       | 8        | 1        | 5        | 4        | 4        | 2        | Bacteria; Proteobacteria; Deltaproteobacteria; Myxococcales                            |
| Otu814  | 4        | 17      | 0       | 0       | 0       | 1       | 1        | 0        | 0        | 0        | 1        | 0        | Bacteria; Proteobacteria; Gammaproteobacteria; Aeromonadales; Aeromonadaceae           |
| Otu3138 | 0        | 0       | 1       | 0       | 0       | 0       | 0        | 0        | 0        | 0        | 2        | 0        | Bacteria; Planctomycetes; Planctomycetia; Pirellulales; Pirellulaceae                  |
| Otu3139 | 2        | 0       | 2       | 1       | 0       | 0       | 0        | 0        | 0        | 0        | 1        | 0        | Bacteria; Proteobacteria; Gammaproteobacteria; Legionellales                           |
| Otu819  | 7        | 0       | 7       | 13      | 4       | 2       | 12       | 6        | 3        | 8        | 7        | 5        | Bacteria; WPS-2                                                                        |
| Otu818  | 59       | 24      | 13      | 21      | 32      | 19      | 26       | 17       | 15       | 103      | 101      | 20       | Bacteria; Bacteroidetes; Saprospirae; Saprospirales; Chitinophagaceae; Flavisolibacter |
| Otu1503 | 11       | 8       | 6       | 4       | 5       | 7       | 7        | 3        | 4        | 1        | 12       | 3        | Bacteria; Actinobacteria; Thermoleophilia; Gaiellales; Gaiellaceae                     |
| Otu2478 | 1        | 1       | 2       | 2       | 0       | 0       | 0        | 2        | 3        | 3        | 0        | 1        | Bacteria; Bacteroidetes; Sphingobacteriia; Sphingobacteriales                          |
| Otu1502 | 1        | 1       | 0       | 1       | 0       | 0       | 6        | 0        | 3        | 2        | 1        | 1        | Bacteria                                                                               |
| Otu2476 | 0        | 0       | 0       | 0       | 0       | 3       | 0        | 0        | 0        | 0        | 0        | 0        | Bacteria; OP3; koll11                                                                  |

| #OTU ID | Z31DSO1r | Z31DSO2 | Z31DSO3 | Z31DSO4 | Z31DSO5 | Z31DSO6 | Z31J1DSO1 | Z31J1DSO2 | Z31J1DSO3 | Z31J1DSO4 | Z31J1DSO5 | Z31J1DSO6 | taxonomy                                                                                 |
|---------|----------|---------|---------|---------|---------|---------|-----------|-----------|-----------|-----------|-----------|-----------|------------------------------------------------------------------------------------------|
| Otu2477 | 0        | 2       | 0       | 0       | 0       | 1       | 2         | 0         | 0         | 0         | 2         | 0         | Bacteria                                                                                 |
| Otu2474 | 2        | 0       | 0       | 1       | 0       | 0       | 0         | 0         | 1         | 0         | 1         | 0         | Bacteria; OD1; SM2F11                                                                    |
| Otu2475 | 1        | 1       | 1       | 2       | 0       | 4       | 0         | 1         | 2         | 2         | 3         | 4         | Bacteria; OD1; SM2F11                                                                    |
| Otu2472 | 3        | 2       | 1       | 0       | 1       | 1       | 1         | 1         | 0         | 2         | 1         | 1         | Bacteria; Firmicutes; Clostridia; Clostridiales                                          |
| Otu1501 | 1        | 2       | 2       | 1       | 0       | 7       | 0         | 3         | 4         | 4         | 2         | 2         | Bacteria; Chloroflexi; Ktedonobacteria; Ktedonobacteriales; Ktedonobacteraceae           |
| Otu2470 | 2        | 0       | 0       | 0       | 0       | 0       | 0         | 2         | 0         | 0         | 2         | 0         | Bacteria; Proteobacteria; Gammaproteobacteria                                            |
| Otu1500 | 2        | 1       | 1       | 5       | 2       | 0       | 0         | 1         | 1         | 2         | 0         | 0         | Bacteria; Planctomycetes; Phycisphaerae; WD2101                                          |
| Otu1507 | 0        | 0       | 3       | 5       | 5       | 0       | 1         | 0         | 0         | 0         | 1         | 0         | Bacteria; Proteobacteria; Gammaproteobacteria; Legionellales; Coxiellaceae; Aquicella    |
| Otu11   | 298      | 210     | 331     | 617     | 188     | 468     | 469       | 413       | 573       | 860       | 460       | 668       | Bacteria; Acidobacteria; Acidobacteriia; Acidobacteriales; Koribacteraceae               |
| Otu1505 | 5        | 4       | 1       | 1       | 1       | 0       | 0         | 0         | 0         | 0         | 2         | 0         | Bacteria; Planctomycetes; Phycisphaerae; WD2101                                          |
| Otu1504 | 9        | 5       | 5       | 1       | 2       | 5       | 1         | 0         | 0         | 6         | 5         | 6         | Bacteria; Proteobacteria; Alphaproteobacteria; Rickettsiales                             |
| Otu578  | 20       | 2       | 2       | 1       | 8       | 1       | 1         | 3         | 1         | 1         | 11        | 0         | Bacteria; Planctomycetes; Phycisphaerae; WD2101                                          |
| Otu1508 | 9        | 0       | 2       | 6       | 2       | 1       | 4         | 0         | 3         | 2         | 2         | 1         | Bacteria; Planctomycetes; Planctomycetia; Gemmatales; Gemmataceae                        |
| Otu3228 | 0        | 0       | 0       | 2       | 0       | 0       | 0         | 0         | 0         | 0         | 3         | 0         | Bacteria; Proteobacteria; Deltaproteobacteria; Myxococcales                              |
| Otu3229 | 7        | 0       | 2       | 5       | 1       | 3       | 3         | 5         | 3         | 6         | 4         | 0         | Bacteria; Acidobacteria; Chloracidobacteria; RB41; Ellin6075                             |
| Otu579  | 20       | 16      | 5       | 22      | 8       | 2       | 27        | 10        | 8         | 18        | 11        | 15        | Bacteria; Gemmatimonadetes; Gemmatimonadetes; Ellin5290                                  |
| Otu3224 | 2        | 0       | 0       | 0       | 0       | 0       | 0         | 0         | 0         | 0         | 0         | 0         | Bacteria; Proteobacteria; Alphaproteobacteria; Rhodospirillales; Rhodospirillaceae       |
| Otu3225 | 3        | 0       | 1       | 0       | 0       | 0       | 0         | 0         | 0         | 0         | 0         | 0         | Bacteria; Planctomycetes; Planctomycetia; Pirellulales; Pirellulaceae                    |
| Otu3226 | 0        | 0       | 0       | 0       | 1       | 0       | 0         | 0         | 1         | 0         | 2         | 0         | Bacteria; Tenericutes; Mollicutes; Anaeroplasmatales; Anaeroplasmataceae; Asteroleplasma |
| Otu3227 | 0        | 0       | 0       | 0       | 0       | 2       | 0         | 0         | 0         | 1         | 0         | 1         | Bacteria; Chloroflexi; C0119                                                             |
| Otu3220 | 47       | 19      | 8       | 3       | 19      | 0       | 4         | 3         | 3         | 9         | 18        | 5         | Bacteria; Bacteroidetes; Saprospirae; Saprospirales; Chitinophagaceae; Flavisolibacter   |
| Otu3221 | 0        | 0       | 0       | 0       | 0       | 0       | 0         | 0         | 0         | 0         | 2         | 0         | Bacteria; Bacteroidetes                                                                  |

| #OTU ID | Z31DSO1r | Z31DSO2 | Z31DSO3 | Z31DSO4 | Z31DSO5 | Z31DSO6 | Z31J1DSO1 | Z31J1DSO2 | Z31J1DSO3 | Z31J1DSO4 | Z31J1DSO5 | Z31J1DSO6 | taxonomy                                                                                            |
|---------|----------|---------|---------|---------|---------|---------|-----------|-----------|-----------|-----------|-----------|-----------|-----------------------------------------------------------------------------------------------------|
| Otu3222 | 1        | 1       | 1       | 2       | 0       | 0       | 2         | 0         | 0         | 0         | 0         | 0         | Bacteria; Firmicutes; Clostridia; Clostridiales                                                     |
| Otu3223 | 0        | 0       | 0       | 0       | 0       | 3       | 0         | 0         | 0         | 0         | 0         | 1         | Bacteria; Acidobacteria; Solibacteres; Solibacterales; Solibacteraceae; Candidatus_Solibacter       |
| Otu3487 | 3        | 0       | 0       | 1       | 0       | 0       | 0         | 0         | 0         | 0         | 0         | 0         | Bacteria; Armatimonadetes; Armatimonadia; Armatimonadales; Armatimonadaceae                         |
| Otu1752 | 0        | 0       | 0       | 0       | 0       | 0       | 0         | 0         | 0         | 1         | 0         | 3         | Bacteria; Bacteroidetes; Saprospirae; Saprospirales; Chitinophagaceae                               |
| Otu1019 | 16       | 3       | 7       | 15      | 7       | 2       | 5         | 2         | 9         | 4         | 14        | 0         | Bacteria; Proteobacteria; Betaproteobacteria                                                        |
| Otu1750 | 1        | 0       | 2       | 3       | 1       | 1       | 0         | 2         | 0         | 3         | 3         | 1         | Bacteria; Armatimonadetes; 0319-6E2                                                                 |
| Otu1751 | 0        | 0       | 0       | 3       | 1       | 0       | 0         | 0         | 0         | 1         | 0         | 0         | Bacteria; Planctomycetes; Planctomycetia; Gemmatales; Gemmataceae; Gemmata                          |
| Otu1756 | 2        | 7       | 4       | 8       | 3       | 5       | 3         | 5         | 5         | 6         | 10        | 4         | Bacteria; Firmicutes; Bacilli; Bacillales; Paenibacillaceae; Ammoniphilus                           |
| Otu1757 | 0        | 0       | 0       | 3       | 0       | 2       | 0         | 0         | 0         | 1         | 1         | 2         | Bacteria; Planctomycetes; vadinHA49; DH61                                                           |
| Otu1754 | 3        | 0       | 7       | 1       | 0       | 0       | 2         | 0         | 1         | 0         | 4         | 1         | Bacteria; Proteobacteria; Betaproteobacteria; Methylophilales; Methylophilaceae                     |
| Otu1018 | 0        | 7       | 3       | 3       | 2       | 5       | 4         | 3         | 2         | 11        | 3         | 0         | Bacteria; Proteobacteria; Gammaproteobacteria; Legionellales; Coxiellaceae                          |
| Otu2065 | 0        | 0       | 1       | 3       | 0       | 1       | 1         | 0         | 3         | 1         | 1         | 0         | Bacteria; Actinobacteria; Acidimicrobia; Acidimicrobiales                                           |
| Otu2064 | 3        | 0       | 0       | 4       | 0       | 1       | 1         | 0         | 0         | 0         | 1         | 1         | Bacteria; Proteobacteria; Alphaproteobacteria; Sphingomonadales; Sphingomonadaceae; Novosphingobium |
| Otu1758 | 5        | 0       | 2       | 2       | 1       | 5       | 3         | 3         | 2         | 2         | 5         | 1         | Bacteria; Planctomycetes; Planctomycetia; Planctomycetales; Planctomycetaceae; Planctomyces         |
| Otu1759 | 0        | 0       | 1       | 1       | 0       | 3       | 1         | 1         | 1         | 1         | 0         | 0         | Bacteria; Planctomycetes; Planctomycetia; Gemmatales; Gemmataceae                                   |
| Otu2061 | 1        | 0       | 0       | 0       | 0       | 0       | 0         | 0         | 2         | 3         | 0         | 0         | Bacteria; Chlamydiae; Chlamydia; Chlamydiales                                                       |
| Otu2060 | 1        | 1       | 1       | 2       | 1       | 0       | 0         | 1         | 2         | 5         | 2         | 0         | Bacteria; Planctomycetes; Phycisphaerae; WD2101                                                     |
| Otu2063 | 0        | 0       | 0       | 3       | 0       | 1       | 0         | 0         | 0         | 0         | 0         | 0         | Bacteria; Proteobacteria; Alphaproteobacteria; Ellin329                                             |
| Otu2062 | 3        | 0       | 1       | 2       | 1       | 3       | 4         | 2         | 2         | 1         | 3         | 1         | Bacteria; Chloroflexi; Ktedonobacteria; JG30-KF-AS9                                                 |
| Otu1994 | 0        | 1       | 1       | 0       | 0       | 0       | 1         | 0         | 0         | 0         | 3         | 0         | Bacteria; Planctomycetes; Planctomycetia; Gemmatales; Gemmataceae                                   |
| Otu1995 | 0        | 0       | 3       | 1       | 2       | 2       | 1         | 3         | 3         | 2         | 0         | 2         | Bacteria; Chloroflexi; Anaerolineae; SBR1031; oc28                                                  |
| Otu1996 | 0        | 1       | 0       | 0       | 0       | 0       | 0         | 0         | 0         | 0         | 3         | 0         | Bacteria; Proteobacteria                                                                            |

| #OTU ID | Z31DSO1r | Z31DSO2 | Z31DSO3 | Z31DSO4 | Z31DSO5 | Z31DSO6 | Z31JDSO1 | Z31JDSO2 | Z31JDSO3 | Z31JDSO4 | Z31JDSO5 | Z31JDSO6 | taxonomy                                                                                 |
|---------|----------|---------|---------|---------|---------|---------|----------|----------|----------|----------|----------|----------|------------------------------------------------------------------------------------------|
| Otu1997 | 0        | 4       | 4       | 1       | 4       | 4       | 9        | 2        | 3        | 4        | 5        | 6        | Bacteria; Firmicutes; Bacilli; Bacillales; Paenibacillaceae; Brevibacillus               |
| Otu1990 | 0        | 0       | 1       | 3       | 0       | 0       | 4        | 1        | 4        | 3        | 2        | 1        | Bacteria; Actinobacteria                                                                 |
| Otu1991 | 10       | 0       | 0       | 0       | 0       | 6       | 1        | 1        | 1        | 3        | 2        | 1        | Bacteria; Proteobacteria; Deltaproteobacteria; Myxococcales                              |
| Otu1992 | 0        | 0       | 0       | 0       | 0       | 5       | 1        | 0        | 0        | 1        | 0        | 0        | Bacteria; ODI; ZB2                                                                       |
| Otu1993 | 5        | 5       | 4       | 4       | 4       | 2       | 4        | 2        | 0        | 0        | 4        | 0        | Bacteria; Tenericutes; Mollicutes; Anaeroplasmatales; Anaeroplasmataceae; Asteroleplasma |
| Otu2267 | 0        | 0       | 0       | 0       | 0       | 0       | 1        | 0        | 0        | 2        | 0        | 0        | Bacteria; TM7; SC3                                                                       |
| Otu2266 | 2        | 2       | 2       | 2       | 3       | 6       | 3        | 2        | 2        | 5        | 2        | 4        | Bacteria; Proteobacteria; Deltaproteobacteria; Myxococcales                              |
| Otu2265 | 2        | 0       | 0       | 1       | 0       | 1       | 0        | 0        | 0        | 0        | 0        | 1        | Bacteria                                                                                 |
| Otu2264 | 0        | 2       | 0       | 0       | 0       | 0       | 0        | 0        | 0        | 0        | 0        | 0        | Bacteria; Proteobacteria; Gammaproteobacteria; Alteromonadales; 125ds10                  |
| Otu1998 | 3        | 0       | 0       | 5       | 3       | 0       | 1        | 1        | 0        | 1        | 6        | 0        | Bacteria; Chloroflexi; Anaerolineae; SBR1031; oc28                                       |
| Otu1999 | 2        | 1       | 0       | 3       | 0       | 1       | 1        | 1        | 2        | 0        | 3        | 5        | Bacteria; Proteobacteria; Betaproteobacteria                                             |
| Otu2261 | 0        | 2       | 1       | 0       | 3       | 2       | 4        | 0        | 1        | 0        | 1        | 2        | Bacteria; Actinobacteria; Acidimicrobiia; Acidimicrobiales; EB1017                       |
| Otu2260 | 0        | 1       | 0       | 2       | 0       | 2       | 1        | 0        | 1        | 0        | 0        | 0        | Bacteria                                                                                 |
| Otu2791 | 0        | 0       | 2       | 1       | 1       | 0       | 2        | 0        | 0        | 0        | 0        | 0        | Bacteria; Proteobacteria; Alphaproteobacteria                                            |
| Otu2490 | 0        | 0       | 0       | 0       | 0       | 0       | 2        | 0        | 0        | 0        | 0        | 0        | Bacteria                                                                                 |
| Otu2491 | 0        | 0       | 2       | 1       | 2       | 1       | 2        | 0        | 0        | 1        | 1        | 0        | Bacteria; Chloroflexi; Chloroflexi; Roseiflexales; Kouleothrixaceae                      |
| Otu978  | 15       | 5       | 11      | 1       | 6       | 1       | 3        | 1        | 4        | 2        | 2        | 3        | Bacteria; Proteobacteria; Betaproteobacteria; A21b; UD5                                  |
| Otu979  | 16       | 10      | 13      | 14      | 6       | 1       | 19       | 7        | 7        | 24       | 6        | 6        | Bacteria; TM6; SJA-4                                                                     |
| Otu206  | 0        | 0       | 66      | 3       | 0       | 1       | 6        | 0        | 0        | 0        | 2        | 1        | Bacteria; Proteobacteria; Alphaproteobacteria; Rickettsiales; mitochondria               |
| Otu208  | 35       | 41      | 58      | 90      | 21      | 44      | 81       | 59       | 43       | 58       | 48       | 88       | Bacteria; Verrucomicrobia; Pedosphaerae; Pedosphaerales                                  |
| Otu757  | 12       | 6       | 0       | 8       | 6       | 2       | 6        | 1        | 3        | 2        | 9        | 3        | Bacteria; Proteobacteria; Betaproteobacteria; SC-I-84                                    |
| Otu1527 | 6        | 0       | 0       | 2       | 0       | 2       | 0        | 0        | 0        | 2        | 4        | 0        | Bacteria; Proteobacteria; Deltaproteobacteria; Myxococcales; Cystobacterineae            |

| #OTU ID | Z31DSO1r | Z31DSO2 | Z31DSO3 | Z31DSO4 | Z31DSO5 | Z31DSO6 | Z31JDSO1 | Z31JDSO2 | Z31JDSO3 | Z31JDSO4 | Z31JDSO5 | Z31JDSO6 | taxonomy                                                                                        |
|---------|----------|---------|---------|---------|---------|---------|----------|----------|----------|----------|----------|----------|-------------------------------------------------------------------------------------------------|
| Otu207  | 103      | 83      | 81      | 104     | 34      | 150     | 89       | 101      | 158      | 111      | 80       | 159      | Bacteria; Acidobacteria; Solibacteres; Solibacterales                                           |
| Otu204  | 239      | 105     | 186     | 180     | 90      | 87      | 192      | 119      | 173      | 148      | 123      | 161      | Bacteria; Proteobacteria; Betaproteobacteria; Burkholderiales; Comamonadaceae                   |
| Otu205  | 109      | 88      | 121     | 48      | 64      | 124     | 167      | 50       | 75       | 36       | 106      | 60       | Bacteria; Actinobacteria; Actinobacteria; Actinomycetales; Micromonosporaceae                   |
| Otu202  | 61       | 44      | 40      | 82      | 27      | 83      | 138      | 66       | 113      | 53       | 94       | 65       | Bacteria; Actinobacteria; Thermoleophilia; Gaiellales; Gaiellaceae                              |
| Otu203  | 1        | 2       | 0       | 0       | 0       | 0       | 0        | 0        | 0        | 57       | 2        | 3        | Bacteria; Proteobacteria; Alphaproteobacteria; Caulobacterales; Caulobacteraceae; Asticcacaulis |
| Otu14   | 680      | 382     | 318     | 886     | 398     | 280     | 650      | 488      | 461      | 926      | 886      | 335      | Bacteria; Bacteroidetes; Saprospirae; Saprospirales; Chitinophagaceae; Flavisolibacter          |
| Otu15   | 310      | 78      | 247     | 449     | 121     | 342     | 342      | 425      | 399      | 711      | 377      | 608      | Bacteria; Acidobacteria; Acidobacteriia; Acidobacteriales; Koribacteraceae                      |
| Otu16   | 80       | 62      | 436     | 340     | 157     | 218     | 689      | 122      | 86       | 64       | 390      | 118      | Bacteria; Actinobacteria; Actinobacteria; Actinomycetales; Micrococcaceae                       |
| Otu17   | 636      | 259     | 266     | 340     | 237     | 157     | 388      | 169      | 254      | 229      | 445      | 148      | Bacteria; Proteobacteria; Betaproteobacteria                                                    |
| Otu10   | 823      | 38      | 61      | 63      | 20      | 63      | 45       | 49       | 70       | 44       | 29       | 72       | Bacteria; Bacteroidetes; Cytophagia; Cytophagales; Cytophagaceae                                |
| Otu200  | 1        | 1       | 2       | 8       | 67      | 0       | 4        | 2        | 1        | 2        | 8        | 2        | Bacteria; Bacteroidetes; Saprospirae; Saprospirales; Chitinophagaceae                           |
| Otu12   | 585      | 259     | 525     | 774     | 342     | 332     | 664      | 561      | 619      | 846      | 653      | 568      | Bacteria; Acidobacteria; Acidobacteriia; Acidobacteriales; Koribacteraceae                      |
| Otu13   | 72       | 10      | 245     | 240     | 192     | 65      | 146      | 703      | 347      | 58       | 7        | 889      | Bacteria; Bacteroidetes; Sphingobacteriia; Sphingobacteriales; Sphingobacteriaceae              |
| Otu1509 | 1        | 4       | 5       | 1       | 10      | 0       | 0        | 0        | 0        | 2        | 6        | 2        | Bacteria; Chloroflexi; Anaerolineae; SBR1031; oc28                                              |
| Otu973  | 6        | 4       | 6       | 10      | 4       | 8       | 14       | 6        | 11       | 6        | 9        | 3        | Bacteria; Actinobacteria; Thermoleophilia; Solirubrobacterales                                  |
| Otu18   | 4        | 5       | 21      | 23      | 4       | 5       | 32       | 11       | 19       | 841      | 2        | 13       | Bacteria; Bacteroidetes; Flavobacteriia; Flavobacteriales; Weeksellaceae; Chryseobacterium      |
| Otu19   | 1260     | 761     | 307     | 326     | 427     | 98      | 241      | 97       | 112      | 471      | 406      | 227      | Bacteria; Acidobacteria; Chloracidobacteria; RB41                                               |
| Otu2087 | 0        | 1       | 1       | 3       | 1       | 0       | 3        | 0        | 2        | 2        | 0        | 2        | Bacteria; TM6; SJA-4                                                                            |
| Otu2086 | 0        | 0       | 2       | 3       | 0       | 0       | 0        | 0        | 0        | 2        | 1        | 0        | Bacteria; Proteobacteria; Gammaproteobacteria; Xanthomonadales; Sinobacteraceae; Nevskia        |
| Otu2085 | 9        | 0       | 0       | 0       | 1       | 2       | 2        | 0        | 0        | 0        | 0        | 0        | Bacteria; Gemmatimonadetes; Gemmatimonadetes                                                    |
| Otu2084 | 2        | 2       | 1       | 2       | 1       | 1       | 1        | 1        | 4        | 4        | 4        | 1        | Bacteria; Actinobacteria; Acidimicrobiia; Acidimicrobiales                                      |
| Otu2083 | 3        | 1       | 3       | 1       | 2       | 0       | 1        | 0        | 1        | 1        | 2        | 0        | Bacteria; Chloroflexi; Chloroflexi; Roseiflexales; Kouleothrixaceae                             |

| #OTU ID | Z31DSO1r | Z31DSO2 | Z31DSO3 | Z31DSO4 | Z31DSO5 | Z31DSO6 | Z31JDSO1 | Z31JDSO2 | Z31JDSO3 | Z31JDSO4 | Z31JDSO5 | Z31JDSO6 | taxonomy                                                                           |
|---------|----------|---------|---------|---------|---------|---------|----------|----------|----------|----------|----------|----------|------------------------------------------------------------------------------------|
| Otu2082 | 0        | 1       | 1       | 3       | 0       | 0       | 1        | 0        | 0        | 0        | 3        | 1        | Bacteria; Chlamydiae; Chlamydiia; Chlamydiales                                     |
| Otu2081 | 0        | 0       | 1       | 2       | 3       | 0       | 2        | 1        | 0        | 0        | 2        | 0        | Bacteria; Armatimonadetes; Chthonomonadetes; SJA-22                                |
| Otu2080 | 3        | 0       | 0       | 0       | 2       | 0       | 0        | 1        | 0        | 0        | 0        | 0        | Bacteria; Verrucomicrobia; Opitutae; Cerasiococcales; Cerasiococcaceae             |
| Otu2089 | 3        | 2       | 5       | 3       | 1       | 0       | 2        | 3        | 2        | 0        | 1        | 0        | Bacteria; Verrucomicrobia; Spartobacteria; Chthoniobacterales; Chthoniobacteraceae |
| Otu2088 | 0        | 0       | 0       | 1       | 0       | 4       | 5        | 5        | 3        | 0        | 0        | 2        | Bacteria; Gemmatimonadetes; Gemmatimonadetes; Ellin5290                            |





| group    | shared OTU_number/<br>uniuqe OTU_number | OTU_ID                                                                                                                                                                                                                                                                                                                                                                                                                                                                                                                                                                                                                                                                                                                                                                                                                                                                                                                                                                                                                                                                                                                                                                                                                                                                                                                                                                                                                                                                                                                                                                                                                                                                                                                                                                                                                                                                                                                                                                                                                                                                                                                                                                                                                                                                                                                                                                                                                                                                                                                                                                        |
|----------|-----------------------------------------|-------------------------------------------------------------------------------------------------------------------------------------------------------------------------------------------------------------------------------------------------------------------------------------------------------------------------------------------------------------------------------------------------------------------------------------------------------------------------------------------------------------------------------------------------------------------------------------------------------------------------------------------------------------------------------------------------------------------------------------------------------------------------------------------------------------------------------------------------------------------------------------------------------------------------------------------------------------------------------------------------------------------------------------------------------------------------------------------------------------------------------------------------------------------------------------------------------------------------------------------------------------------------------------------------------------------------------------------------------------------------------------------------------------------------------------------------------------------------------------------------------------------------------------------------------------------------------------------------------------------------------------------------------------------------------------------------------------------------------------------------------------------------------------------------------------------------------------------------------------------------------------------------------------------------------------------------------------------------------------------------------------------------------------------------------------------------------------------------------------------------------------------------------------------------------------------------------------------------------------------------------------------------------------------------------------------------------------------------------------------------------------------------------------------------------------------------------------------------------------------------------------------------------------------------------------------------------|
| Z31DSO   | 310                                     | <p>Otu1022,Otu1046,Otu1066,Otu1137,Otu1145,Otu1151,Otu1202,Otu1224,Otu1234,Otu1266,Otu1272,Otu1303,Otu1332,Otu1347,Otu1397,Otu1405,Otu1413,Otu1449,Otu1548,Otu1575,Otu1577,Otu1660,Otu1678,Otu1699,Otu1702,Otu1716,Otu1728,Otu1729,Otu1730,Otu1738,Otu1762,Otu1825,Otu1840,Otu1843,Otu1848,Otu1850,Otu1854,Otu1858,Otu1860,Otu1864,Otu1867,Otu1881,Otu1891,Otu1909,Otu1929,Otu1931,Otu1934,Otu1940,Otu1960,Otu1973,Otu1975,Otu2038,Otu2042,Otu2048,Otu2056,Otu2063,Otu2079,Otu2094,Otu2098,Otu2105,Otu2135,Otu2169,Otu2170,Otu2172,Otu2182,Otu2190,Otu2193,Otu2196,Otu2209,Otu2212,Otu2213,Otu2218,Otu2228,Otu2240,Otu2250,Otu2251,Otu2254,Otu2258,Otu2263,Otu2264,Otu2269,Otu2276,Otu2277,Otu2308,Otu2312,Otu2315,Otu2326,Otu2329,Otu2332,Otu2339,Otu2340,Otu2359,Otu2360,Otu2375,Otu2382,Otu2385,Otu2391,Otu2392,Otu2398,Otu2404,Otu2408,Otu2413,Otu2429,Otu2436,Otu2441,Otu2445,Otu2448,Otu2451,Otu2460,Otu2476,Otu2480,Otu2481,Otu2484,Otu2487,Otu2512,Otu2514,Otu2531,Otu2532,Otu2534,Otu2544,Otu2549,Otu2551,Otu2558,Otu2560,Otu2571,Otu2574,Otu2575,Otu2577,Otu2579,Otu2581,Otu2591,Otu2595,Otu2597,Otu2598,Otu2599,Otu2605,Otu2607,Otu2612,Otu2614,Otu2618,Otu2624,Otu2633,Otu2641,Otu2643,Otu2660,Otu2668,Otu2671,Otu2673,Otu2688,Otu2690,Otu2700,Otu2706,Otu2720,Otu2730,Otu2738,Otu2739,Otu2753,Otu2759,Otu2765,Otu2766,Otu2771,Otu2782,Otu2785,Otu2793,Otu2797,Otu2805,Otu2809,Otu2812,Otu2814,Otu2817,Otu2821,Otu2830,Otu2839,Otu2841,Otu2845,Otu2852,Otu2855,Otu2860,Otu2876,Otu2885,Otu2886,Otu2887,Otu2890,Otu2899,Otu2901,Otu2907,Otu2908,Otu2909,Otu2915,Otu2921,Otu2922,Otu2930,Otu2931,Otu2937,Otu2942,Otu2949,Otu2951,Otu2954,Otu2965,Otu2967,Otu2976,Otu3006,Otu3013,Otu3017,Otu3021,Otu3028,Otu3034,Otu3036,Otu3037,Otu3040,Otu3044,Otu3046,Otu3048,Otu3055,Otu3064,Otu3065,Otu3071,Otu3080,Otu3083,Otu3084,Otu3085,Otu3095,Otu3106,Otu3111,Otu3114,Otu3117,Otu3125,Otu3129,Otu3131,Otu3143,Otu3146,Otu3147,Otu3150,Otu3160,Otu3164,Otu3169,Otu3171,Otu3179,Otu3184,Otu3185,Otu3186,Otu3193,Otu3197,Otu3210,Otu3213,Otu3224,Otu3225,Otu3230,Otu3241,Otu3243,Otu3257,Otu3264,Otu3267,Otu3269,Otu3278,Otu3281,Otu3282,Otu3285,Otu3287,Otu3290,Otu3299,Otu3302,Otu3304,Otu3309,Otu3311,Otu3312,Otu3315,Otu3321,Otu3322,Otu3329,Otu3331,Otu3344,Otu3353,Otu3363,Otu3366,Otu3367,Otu3369,Otu3377,Otu3386,Otu3396,Otu3408,Otu3414,Otu3416,Otu3422,Otu3424,Otu3425,Otu3427,Otu3428,Otu3432,Otu3440,Otu3443,Otu3454,Otu3459,Otu3462,Otu3469,Otu3471,Otu3473,Otu3474,Otu3479,Otu3481,Otu3487,Otu423,Otu433,Otu453,Otu649,Otu650,Otu861,Otu903,Otu906,Otu950</p> |
| Z31J1DSO | 143                                     | <p>Otu1001,Otu1271,Otu1284,Otu1314,Otu1361,Otu1476,Otu1536,Otu1557,Otu1565,Otu1694,Otu1710,Otu1713,Otu1732,Otu1752,Otu1760,Otu1769,Otu1784,Otu1834,Otu1841,Otu1844,Otu1846,Otu1894,Otu1896,Otu1908,Otu1915,Otu1936,Otu2069,Otu2077,Otu2109,Otu2118,Otu2120,Otu2163,Otu2164,Otu2198,Otu2207,Otu2211,Otu2243,Otu2253,Otu2267,Otu2287,Otu2298,Otu2334,Otu2346,Otu2347,Otu2357,Otu2371,Otu2387,Otu2419,Otu2424,Otu2425,Otu2428,Otu2432,Otu2459,Otu2482,Otu2485,Otu2488,Otu2490,Otu2494,Otu2503,Otu2525,Otu2529,Otu2535,Otu2556,Otu2561,Otu2569,Otu2570,Otu2578,Otu2585,Otu2604,Otu2606,Otu2616,Otu2636,Otu2656,Otu2696,Otu2702,Otu2716,Otu2725,Otu2743,Otu2746,Otu2761,Otu2788,Otu2806,Otu2880,Otu2895,Otu2898,Otu2924,Otu2943,Otu2953,Otu2961,Otu2974,Otu2994,Otu3003,Otu3004,Otu3018,Otu3030,Otu3033,Otu3039,Otu3072,Otu3076,Otu3077,Otu3079,Otu3086,Otu3089,Otu3096,Otu3101,Otu3107,Otu3126,Otu3127,Otu3128,Otu3130,Otu3158,Otu3183,Otu3215,Otu3221,Otu3237,Otu3255,Otu326,Otu3268,Otu3310,Otu3323,Otu3327,Otu3340,Otu3341,Otu3347,Otu3348,Otu3364,Otu3368,Otu338,Otu3381,Otu3388,Otu3391,Otu3398,Otu3410,Otu3412,Otu3415,Otu3438,Otu3441,Otu3445,Otu3447,Otu3449,Otu582,Otu591,Otu764</p>                                                                                                                                                                                                                                                                                                                                                                                                                                                                                                                                                                                                                                                                                                                                                                                                                                                                                                                                                                                                                                                                                                                                                                                                                                                                                                                                                                                     |

**Table S5. Comparison of alpha diversity of rhizosphere soils between glyphosate treated transgenic soybean line Z31 and its control line Z31 in pod-setting stage.**

| Alpha diversity        | Rhizosphere of glyphosate treated line Z31<br>(Z31J1DRh) |                 | Rhizosphere of the control line Z31<br>(Z31DRh) |                 | <i>p</i> -value<br>(Wilcoxon) <sup>2</sup> |
|------------------------|----------------------------------------------------------|-----------------|-------------------------------------------------|-----------------|--------------------------------------------|
|                        | Mean                                                     | SD <sup>1</sup> | Mean                                            | SD <sup>1</sup> |                                            |
| Observed OTU<br>number | 2518                                                     | 262.34          | 2340                                            | 218.95          | 0.30952                                    |
| Chao 1                 | 2818.32                                                  | 206.99          | 2689.36                                         | 192.89          | 0.30952                                    |
| ACE                    | 2880.83                                                  | 204.10          | 2741.20                                         | 210.66          | 0.30952                                    |
| Shannon                | 6.19996                                                  | 0.21245         | 6.11519                                         | 0.28287         | 0.58874                                    |
| Simpson                | 0.00707                                                  | 0.00284         | 0.00859                                         | 0.00513         | 0.69913                                    |

<sup>1</sup> SD means standard deviation.

<sup>2</sup> The significance test method is Wilcoxon Rank-Sum Test.

**Table S6. Comparison of alpha diversity of surrounding soils between glyphosate treated transgenic soybean line Z31 and its control line Z31 in pod-setting stage.**

| Alpha diversity        | Surrounding soil of glyphosate treated line Z31<br>(Z31J1DSO) |                 | Surrounding soil of the control line Z31<br>(Z31DSO) |                 | <i>p</i> -value<br>(Wilcoxon) <sup>2</sup> |
|------------------------|---------------------------------------------------------------|-----------------|------------------------------------------------------|-----------------|--------------------------------------------|
|                        | Mean                                                          | SD <sup>1</sup> | Mean                                                 | SD <sup>1</sup> |                                            |
| Observed OTU<br>number | 2224                                                          | 154.98          | 2171                                                 | 201.23          | 0.5887                                     |
| Chao 1                 | 2568.98                                                       | 97.90           | 2548.90                                              | 139.03          | 0.69913                                    |
| ACE                    | 2612.08                                                       | 96.49           | 2567.72                                              | 144.55          | 0.58874                                    |
| Shannon                | 6.29488                                                       | 0.07906         | 6.16241                                              | 0.17981         | 0.17965                                    |
| Simpson                | 0.00540                                                       | 0.00129         | 0.00594                                              | 0.00134         | 0.69913                                    |

<sup>1</sup> SD means standard deviation.

<sup>2</sup> The significance test method is Wilcoxon Rank-Sum Test.

Table S7. Differentially relative abundances of bacterial phyla, classes and families between Z31&amp;Z31J1 under systematic contrast(16S)

| Phylum                  | mean of Z31DRh (%) | variance of Z31DRh (%) | std.err of Z31DRh (%) | mean of Z31J1DRh (%) | variance of Z31J1DRh (%) | std.err of Z31J1DRh (%) | p -value        | FDR      | Phylum                  | mean of Z31J1DSO (%) | variance of Z31J1DSO (%) | std.err of Z31J1DSO (%) | mean of Z31DRh (%) | variance of Z31DRh (%) | std.err of Z31DRh (%) | p -value       | FDR     |
|-------------------------|--------------------|------------------------|-----------------------|----------------------|--------------------------|-------------------------|-----------------|----------|-------------------------|----------------------|--------------------------|-------------------------|--------------------|------------------------|-----------------------|----------------|---------|
| <i>Proteobacteria</i>   | <b>38.081640</b>   | 0.188697               | 1.773401              | <b>37.919398</b>     | 0.278392                 | 2.154034                | 0.933939        | 0.953818 | <i>Proteobacteria</i>   | 26.953130            | 0.055287                 | 0.95992                 | 26.912121          | 0.107206               | 1.336702              | 0.94977        | 0.94977 |
| <i>Bacteroidetes</i>    | <b>19.147369</b>   | 0.222783               | 1.926929              | 17.033245            | 0.568928                 | 3.079308                | 0.599576        | 0.841594 | <i>Bacteroidetes</i>    | 13.745794            | 0.031685                 | 0.726689                | <b>16.049835</b>   | 0.232053               | 1.966609              | 0.28726        | 0.65555 |
| <i>Acidobacteria</i>    | 15.643221          | 0.167131               | 1.668987              | <b>18.036485</b>     | 0.270022                 | 2.121406                | 0.400061        | 0.685819 | <i>Acidobacteria</i>    | 23.831791            | 0.038456                 | 0.800579                | 24.472932          | 0.097794               | 1.276673              | 0.6621         | 0.77486 |
| <i>Verrucomicrobia</i>  | 7.014079           | 0.018906               | 0.561336              | 5.703316             | 0.007703                 | 0.358302                | 0.056667        | 0.467114 | <i>Verrucomicrobia</i>  | 7.883529             | 0.003094                 | 0.227094                | 6.499706           | 0.015777               | 0.512785              | <b>0.03358</b> | 0.5373  |
| <i>Planctomycetes</i>   | 4.869870           | 0.010942               | 0.427038              | 5.241979             | 0.014781                 | 0.496337                | 0.607818        | 0.841594 | <i>Planctomycetes</i>   | 5.223058             | 0.006057                 | 0.317729                | 4.680021           | 0.003951               | 0.256601              | 0.207          | 0.65555 |
| <i>Actinobacteria</i>   | 4.613389           | 0.011531               | 0.438383              | 4.999473             | 0.020974                 | 0.591243                | 0.637273        | 0.846357 | <i>Actinobacteria</i>   | 6.579834             | 0.030387                 | 0.711654                | 6.734844           | 0.064987               | 1.040728              | 0.87168        | 0.8998  |
| <i>Chloroflexi</i>      | 3.005337           | 0.007121               | 0.344508              | 2.671856             | 0.008625                 | 0.37915                 | 0.547939        | 0.821908 | <i>Chloroflexi</i>      | 6.219373             | 0.049458                 | 0.907909                | 4.333134           | 0.018598               | 0.556751              | 0.10765        | 0.65555 |
| <i>Gemmatimonadetes</i> | 2.341397           | 0.003472               | 0.240566              | <b>3.429752</b>      | 0.009779                 | 0.403711                | <b>0.030939</b> | 0.467114 | <i>Gemmatimonadetes</i> | 3.595855             | 0.007162                 | 0.345496                | <b>4.152964</b>    | 0.000656               | 0.104598              | 0.15129        | 0.65555 |
| <i>Armatimonadetes</i>  | 1.125770           | 0.000333               | 0.074477              | 0.984257             | 0.001464                 | 0.156216                | 0.438455        | 0.717472 | <i>Armatimonadetes</i>  | 1.118260             | 0.000605                 | 0.10038                 | 1.142159           | 0.001086               | 0.134532              | 0.8571         | 0.8998  |
| <i>Cyanobacteria</i>    | 1.103534           | 0.020409               | 0.583225              | 0.279285             | 0.000172                 | 0.053538                | 0.175121        | 0.467114 | <i>Cyanobacteria</i>    | 0.948873             | 0.002534                 | 0.205489                | 0.737345           | 0.001844               | 0.175292              | 0.43761        | 0.70282 |
| <i>Nitrospirae</i>      | 0.701020           | 0.001116               | 0.136398              | 0.722921             | 0.000595                 | 0.099618                | 0.888667        | 0.953818 | <i>Nitrospirae</i>      | 0.859211             | 0.000577                 | 0.098046                | 0.740864           | 0.000348               | 0.076195              | 0.35055        | 0.65986 |
| <i>Firmicutes</i>       | 0.605389           | 0.000176               | 0.054108              | 0.939715             | 0.002747                 | 0.213965                | 0.145545        | 0.467114 | <i>Firmicutes</i>       | 1.025537             | 0.001758                 | 0.171167                | 1.465142           | 0.001166               | 0.139379              | 0.07468        | 0.65555 |
| <i>Unclassified</i>     | 0.546695           | 9.00E-05               | 0.038643              | 0.552321             | 0.000187                 | 0.055766                | 0.918333        | 0.953818 | <i>Unclassified</i>     | 0.515545             | 5.00E-05                 | 0.028834                | 0.486765           | 0.000114               | 0.043589              | 0.57736        | 0.75613 |
| <i>Chlamydiae</i>       | 0.175353           | 0.000105               | 0.041768              | 0.282466             | 0.000195                 | 0.057001                | 0.145303        | 0.467114 | <i>Chlamydiae</i>       | 0.298994             | 0.000173                 | 0.053703                | 0.372160           | 6.50E-05               | 0.032823              | 0.26358        | 0.65555 |
| <i>TM7</i>              | 0.172268           | 6.00E-06               | 0.010259              | 0.235024             | 0.000128                 | 0.046207                | 0.207606        | 0.467114 | <i>TM7</i>              | 0.138993             | 2.00E-05                 | 0.018393                | 0.182691           | 1.50E-05               | 0.015576              | 0.10203        | 0.65555 |
| <i>Elusimicrobia</i>    | 0.161498           | 6.80E-05               | 0.033644              | 0.241461             | 0.000105                 | 0.04186                 | 0.152515        | 0.467114 | <i>Elusimicrobia</i>    | 0.232576             | 4.50E-05                 | 0.027317                | 0.255978           | 8.70E-05               | 0.038118              | 0.61084        | 0.75613 |
| <i>WS3</i>              | 0.153693           | 0.000151               | 0.050233              | 0.061129             | 3.30E-05                 | 0.02344                 | 0.102242        | 0.467114 | <i>WS3</i>              | 0.154478             | 2.80E-05                 | 0.021433                | 0.062375           | 1.40E-05               | 0.015274              | <b>0.00594</b> | 0.18992 |
| <i>Chlorobi</i>         | 0.110242           | 1.60E-05               | 0.016285              | 0.113946             | 3.60E-05                 | 0.024385                | 0.890758        | 0.953818 | <i>Chlorobi</i>         | 0.191008             | 1.20E-05                 | 0.014323                | 0.205956           | 4.30E-05               | 0.026684              | 0.61436        | 0.75613 |
| <i>OD1</i>              | 0.088695           | 3.70E-05               | 0.024959              | 0.167844             | 0.000166                 | 0.05267                 | 0.196909        | 0.467114 | <i>OD1</i>              | 0.102606             | 1.40E-05                 | 0.015371                | 0.149532           | 3.70E-05               | 0.024737              | 0.13836        | 0.65555 |
| <i>TM6</i>              | 0.074766           | 3.50E-05               | 0.023992              | 0.074032             | 1.40E-05                 | 0.015401                | 0.953818        | 0.953818 | <i>TM6</i>              | 0.086738             | 8.00E-06                 | 0.011891                | 0.091836           | 7.00E-06               | 0.010643              | 0.73355        | 0.80943 |
| <i>WPS-2</i>            | 0.055106           | 9.00E-06               | 0.011975              | 0.08314              | 6.00E-06                 | 0.009748                | 0.076758        | 0.467114 | <i>WPS-2</i>            | 0.036376             | 5.00E-06                 | 0.008768                | 0.049519           | 5.00E-06               | 0.008899              | 0.30507        | 0.65555 |
| <i>FBP</i>              | 0.033639           | 2.00E-06               | 0.006448              | 0.032932             | 2.00E-06                 | 0.005249                | 0.917242        | 0.953818 | <i>FBP</i>              | 0.018365             | 1.00E-06                 | 0.003254                | 0.024764           | 1.00E-06               | 0.003523              | 0.20548        | 0.65555 |
| <i>BRC1</i>             | 0.033311           | 2.00E-06               | 0.005724              | 0.028476             | 1.00E-06                 | 0.003978                | 0.524758        | 0.82136  | <i>BRC1</i>             | 0.024742             | 1.00E-06                 | 0.003164                | 0.026609           | 0                      | 0.001768              | 0.60152        | 0.75613 |
| <i>Tenericutes</i>      | 0.032764           | 1.00E-06               | 0.003848              | 0.034502             | 7.00E-06                 | 0.010585                | 0.87397         | 0.953818 | <i>Tenericutes</i>      | 0.098607             | 2.50E-05                 | 0.020567                | 0.068856           | 2.80E-05               | 0.021521              | 0.32865        | 0.65729 |
| <i>Fibrobacteres</i>    | 0.031297           | 1.00E-06               | 0.00413               | 0.018172             | 2.00E-06                 | 0.006052                | 0.080848        | 0.467114 | <i>Fibrobacteres</i>    | 0.032945             | 5.00E-06                 | 0.008749                | 0.028319           | 3.00E-06               | 0.007511              | 0.678          | 0.77486 |
| <i>Spirochaetes</i>     | 0.02335            | 2.00E-06               | 0.005025              | 0.026302             | 3.00E-06                 | 0.007556                | 0.770515        | 0.953818 | <i>Spirochaetes</i>     | 0.030187             | 2.00E-06                 | 0.006015                | 0.019624           | 3.00E-06               | 0.007307              | 0.27971        | 0.65555 |
| <i>OP3</i>              | 0.022811           | 4.00E-06               | 0.008135              | 0.041978             | 2.10E-05                 | 0.018924                | 0.379727        | 0.683509 | <i>OP3</i>              | 0.024698             | 2.00E-06                 | 0.00609                 | 0.030468           | 1.00E-06               | 0.004794              | 0.46123        | 0.70282 |
| <i>Fusobacteria</i>     | 0.017086           | 9.00E-06               | 0.012398              | 0.001347             | 0                        | 0.001347                | 0.229273        | 0.485519 | <i>Fusobacteria</i>     | ND                   |                          |                         |                    |                        |                       |                |         |
| <i>AD3</i>              | 0.007463           | 0                      | 0.001421              | 0.014223             | 1.00E-06                 | 0.00405                 | 0.126909        | 0.467114 | <i>AD3</i>              | 0.014424             | 1.00E-06                 | 0.002956                | 0.011556           | 0                      | 0.002316              | 0.44852        | 0.70282 |
| <i>FCPU426</i>          | 0.003797           | 0                      | 0.001608              | 0.014439             | 2.00E-06                 | 0.005368                | 0.066121        | 0.467114 | <i>FCPU426</i>          | 0.005823             | 0                        | 0.00263                 | 0.00844            | 0                      | 0.002184              | 0.44736        | 0.70282 |
| <i>OP11</i>             | 0.003445           | 0                      | 0.001306              | 0.008125             | 1.00E-06                 | 0.003911                | 0.289091        | 0.547751 | <i>OP11</i>             | 0.005174             | 0                        | 0.002493                | 0.002399           | 0                      | 0.00091               | 0.30729        | 0.65555 |
| <i>WS2</i>              | 0.000531           | 0                      | 0.000365              | 0.001098             | 0                        | 0.001098                | 0.658278        | 0.846357 | <i>WS2</i>              | 0.000581             | 0                        | 0.000581                | 0                  | 0                      | 0                     | 0.22947        | 0.65555 |
| <i>GN02</i>             | 0.000173           | 0                      | 0.000173              | 0.003261             | 0                        | 0.002517                | 0.250424        | 0.500848 | <i>GN02</i>             | 0.002893             | 0                        | 0.001902                | 0.001082           | 0                      | 0.00074               | 0.49224        | 0.71599 |
| <i>NKB19</i>            | 0                  | 0                      | 0                     | 0.000732             | 0                        | 0.000732                | 0.187649        | 0.467114 |                         | ND                   |                          |                         |                    |                        |                       |                |         |
| <i>SBR1093</i>          | 0                  | 0                      | 0                     | 0.000699             | 0                        | 0.000699                | 0.187649        | 0.467114 |                         | ND                   |                          |                         |                    |                        |                       |                |         |
| <i>Thermi</i>           | 0                  | 0                      | 0                     | 0.000671             | 0                        | 0.000671                | 0.187649        | 0.467114 |                         | ND                   |                          |                         |                    |                        |                       |                |         |

Note 1. The relative abundances of taxons, whose p-value were labeled by orange color, were significantly different ( $p < 0.05$ ) between the transgenic soybean line ZUTS31 treated by with glyphosate (or simply Z31J1) versus Z31 treated by with water as control.

Note 2. ND = Not Detected.

Note 3. Digits with red color indicated that the relative abundances of the taxon was significantly different between Z31DRh and Z31J1DRh.

Table S7. Differentially relative abundance of bacterial phyla &amp; classes between Z31&amp;Z31J1 under systematic contrast(16S)

| Class                        | mean of Z31DRh (%) | variance of Z31DRh (%) | std.err of Z31DRh (%) | mean of Z31J1DRh (%) | variance of Z31J1DRh (%) | std.err of Z31J1DRh (%) | p-vlaue  | FDR      | Class                        | mean of Z31J1DRO (%) | variance of Z31J1DRO (%) | std.err of Z31J1DRO (%) | mean of Z31J1DRO (%) | variance of Z31J1DRO (%) | std.err of Z31J1DRO (%) | p-vlaue  | FDR      |
|------------------------------|--------------------|------------------------|-----------------------|----------------------|--------------------------|-------------------------|----------|----------|------------------------------|----------------------|--------------------------|-------------------------|----------------------|--------------------------|-------------------------|----------|----------|
| <i>Betaproteobacteria</i>    | 17.455971          | 0.105316               | 1.32486               | 18.715852            | 0.273845                 | 2.136373                | 0.674763 | 0.915759 | <i>Betaproteobacteria</i>    | 11.311726            | 0.015494                 | 0.508167                | 11.165983            | 0.027417                 | 0.675977                | 0.866392 | 0.925797 |
| <i>Alphaproteobacteria</i>   | 10.718895          | 0.048095               | 0.89532               | 11.061916            | 0.006789                 | 0.336388                | 0.769124 | 0.969385 | <i>Alphaproteobacteria</i>   | 6.960561             | 0.024759                 | 0.642374                | 7.70233              | 0.022114                 | 0.607096                | 0.434928 | 0.761124 |
| <i>Saprospirae</i>           | 9.884602           | 0.121358               | 1.4222                | 6.162623             | 0.014435                 | 0.490497                | 0.023366 | 0.448524 | <i>Saprospirae</i>           | 6.14265              | 0.012442                 | 0.455367                | 5.801089             | 0.006696                 | 0.340586                | 0.574969 | 0.822769 |
| <i>Gammaproteobacteria</i>   | 6.231352           | 0.114506               | 1.38146               | 4.486325             | 0.012096                 | 0.449004                | 0.275072 | 0.660173 | <i>Gammaproteobacter</i>     | 4.810395             | 0.0031                   | 0.227321                | 4.63635              | 0.006565                 | 0.330785                | 0.683979 | 0.886639 |
| <i>Acidobacteriia</i>        | 6.203373           | 0.006661               | 0.3332                | 9.709899             | 0.086258                 | 1.199016                | 0.01233  | 0.448524 | <i>Acidobacteriia</i>        | 9.967443             | 0.059746                 | 0.997884                | 14.265329            | 0.063943                 | 1.032333                | 0.010990 | 0.461664 |
| <i>Chloracidobacteria</i>    | 4.537631           | 0.078855               | 1.1464                | 2.697094             | 0.013354                 | 0.471766                | 0.165866 | 0.596062 | <i>Chloracidobacteria</i>    | 7.256402             | 0.071153                 | 1.08898                 | 4.542056             | 0.025432                 | 0.651056                | 0.049588 | 0.461664 |
| <i>Sphingobacteriia</i>      | 4.180498           | 0.053407               | 0.94346               | 4.522974             | 0.297607                 | 2.22713                 | 0.906381 | 1        | <i>Sphingobacteriia</i>      | 5.294259             | 0.067106                 | 1.057562                | 6.464097             | 0.120753                 | 1.418642                | 0.539082 | 0.820342 |
| <i>Phycisphaerae</i>         | 3.756575           | 0.006792               | 0.33646               | 4.141317             | 0.009674                 | 0.401537                | 0.52266  | 0.854632 | <i>Phycisphaerae</i>         | 4.085359             | 0.00404                  | 0.259478                | 3.724211             | 0.002998                 | 0.223545                | 0.325711 | 0.68098  |
| <i>Deltaproteobacteria</i>   | 3.497309           | 0.009339               | 0.39453               | 3.46069              | 0.007184                 | 0.346022                | 0.949433 | 1        | <i>Deltaproteobacteria</i>   | 3.699662             | 0.000728                 | 0.110121                | 3.202453             | 0.001986                 | 0.181924                | 0.034938 | 0.461664 |
| <i>Actinobacteria</i>        | 3.389393           | 0.004424               | 0.27154               | 3.371274             | 0.022323                 | 0.609961                | 0.973082 | 1        | <i>Actinobacteria</i>        | 4.415468             | 0.028083                 | 0.684143                | 4.072657             | 0.035859                 | 0.773082                | 0.753464 | 0.925797 |
| <i>Spartobacteria</i>        | 3.208331           | 0.021249               | 0.5951                | 2.386847             | 0.002547                 | 0.206017                | 0.225835 | 0.625389 | <i>Spartobacteria</i>        | 2.720665             | 0.001916                 | 0.178684                | 2.080648             | 0.005661                 | 0.307172                | 0.091361 | 0.461664 |
| <i>Solibacteres</i>          | 2.713475           | 0.002605               | 0.20838               | 3.473984             | 0.01002                  | 0.408665                | 0.117041 | 0.596062 | <i>Solibacteres</i>          | 3.278048             | 0.003711                 | 0.248702                | 3.411976             | 0.003738                 | 0.249615                | 0.719959 | 0.910792 |
| <i>Cytophagia</i>            | 2.638113           | 0.003214               | 0.23144               | 4.605912             | 0.045992                 | 0.875517                | 0.041557 | 0.456496 | <i>Cytophagia</i>            | 1.59583              | 0.004158                 | 0.263251                | 1.665251             | 0.002838                 | 0.217487                | 0.843856 | 0.925797 |
| <i>Pedospaerae</i>           | 2.292208           | 0.003481               | 0.24087               | 2.467931             | 0.009042                 | 0.388206                | 0.75334  | 0.96858  | <i>Pedospaerae</i>           | 4.47853              | 0.002559                 | 0.206528                | 3.76443              | 0.00509                  | 0.291252                | 0.063082 | 0.461664 |
| <i>Flavobacteriia</i>        | 2.234088           | 0.034012               | 0.75291               | 1.65216              | 0.035389                 | 0.768                   | 0.650814 | 0.911462 | <i>Flavobacteriia</i>        | 0.586071             | 0.000719                 | 0.109472                | 2.052236             | 0.054952                 | 0.957009                | 0.155918 | 0.583492 |
| <i>Gemmatimonadetes</i>      | 1.977103           | 0.001926               | 0.17915               | 2.964461             | 0.006625                 | 0.332286                | 0.018041 | 0.448524 | <i>Gemmatimonadetes</i>      | 3.022383             | 0.005709                 | 0.308462                | 3.663555             | 0.000791                 | 0.114814                | 0.069732 | 0.461664 |
| <i>Anaerolineae</i>          | 1.565376           | 0.002792               | 0.21571               | 1.31439              | 0.003971                 | 0.257256                | 0.514536 | 0.854632 | <i>Anaerolineae</i>          | 4.589181             | 0.04074                  | 0.824016                | 2.914933             | 0.01038                  | 0.415942                | 0.089072 | 0.461664 |
| <i>Unclassified</i>          | 1.466065           | 0.002682               | 0.21144               | 1.142485             | 0.000932                 | 0.124631                | 0.220907 | 0.625389 | <i>Unclassified</i>          | 1.265179             | 0.000644                 | 0.103597                | 1.126265             | 0.000424                 | 0.084022                | 0.330443 | 0.68098  |
| <i>Acidobacteria-6</i>       | 1.29916            | 0.00508                | 0.29098               | 1.222452             | 0.002118                 | 0.187904                | 0.858    | 1        | <i>Acidobacteria-6</i>       | 1.897501             | 0.00745                  | 0.352367                | 1.07284              | 0.000795                 | 0.115076                | 0.043093 | 0.461664 |
| <i>Thermoleophilia</i>       | 1.018295           | 0.002236               | 0.19306               | 1.418465             | 0.002003                 | 0.182718                | 0.158876 | 0.596062 | <i>Thermoleophilia</i>       | 1.823459             | 0.000609                 | 0.100781                | 2.360233             | 0.004631                 | 0.277813                | 0.088814 | 0.461664 |
| <i>Opitutae</i>              | 0.873779           | 0.000221               | 0.06066               | 0.518329             | 7.30E-05                 | 0.034916                | 0.000216 | 0.023328 | <i>Opitutae</i>              | 0.583323             | 3.00E-05                 | 0.022178                | 0.593597             | 0.000221                 | 0.06064                 | 0.875567 | 0.925797 |
| <i>Planctomycetia</i>        | 0.863849           | 0.000665               | 0.10526               | 0.795463             | 0.000184                 | 0.055339                | 0.628505 | 0.8996   | <i>Planctomycetia</i>        | 0.863663             | 0.000254                 | 0.065088                | 0.757219             | 0.000344                 | 0.075742                | 0.320825 | 0.68098  |
| <i>Nitrospira</i>            | 0.70102            | 0.001116               | 0.1364                | 0.722921             | 0.000595                 | 0.099618                | 0.913402 | 1        | <i>Nitrospira</i>            | 0.859211             | 0.000577                 | 0.098046                | 0.740864             | 0.000348                 | 0.076195                | 0.370515 | 0.712583 |
| <i>Chthonomonadetes</i>      | 0.636733           | 9.70E-05               | 0.04027               | 0.495626             | 0.000306                 | 0.071413                | 0.102876 | 0.596062 | <i>Chthonomonadetes</i>      | 0.577791             | 0.000287                 | 0.069208                | 0.493377             | 0.000235                 | 0.062647                | 0.398474 | 0.733096 |
| <i>Verrucomicrobiae</i>      | 0.608206           | 0.001884               | 0.1772                | 0.300263             | 0.001361                 | 0.150606                | 0.21866  | 0.625389 | <i>Verrucomicrobiae</i>      | 0.092404             | 1.40E-05                 | 0.015261                | 0.052867             | 1.20E-05                 | 0.014048                | 0.075495 | 0.461664 |
| <i>iii1-8</i>                | 0.598308           | 0.000555               | 0.09622               | 0.554375             | 0.000498                 | 0.091065                | 0.787289 | 0.975112 | <i>iii1-8</i>                | 0.887099             | 0.001437                 | 0.154753                | 0.712375             | 0.000252                 | 0.064862                | 0.330474 | 0.68098  |
| <i>Bacilli</i>               | 0.546372           | 0.000151               | 0.05016               | 0.88289              | 0.002895                 | 0.219643                | 0.162485 | 0.596062 | <i>Bacilli</i>               | 0.873029             | 0.001378                 | 0.151574                | 1.267899             | 0.000737                 | 0.110827                | 0.053021 | 0.461664 |
| <i>Ktedonobacteria</i>       | 0.508611           | 0.000651               | 0.1042                | 0.633939             | 0.000261                 | 0.065992                | 0.364649 | 0.787642 | <i>Ktedonobacteria</i>       | 0.430159             | 0.00104                  | 0.131661                | 0.46667              | 9.00E-05                 | 0.038739                | 0.800289 | 0.925797 |
| <i>Chloroflexi</i>           | 0.422077           | 8.40E-05               | 0.03746               | 0.267858             | 0.000156                 | 0.05094                 | 0.024918 | 0.448524 | <i>Chloroflexi</i>           | 0.565148             | 0.00016                  | 0.05165                 | 0.372469             | 0.000596                 | 0.099679                | 0.108072 | 0.461664 |
| <i>Oscillatoriothycideae</i> | 0.337274           | 0.002907               | 0.22013               | 0.029862             | 3.00E-05                 | 0.022239                | 0.194722 | 0.600856 | <i>Oscillatoriothycideae</i> | 0.053802             | 7.30E-05                 | 0.034951                | 0.032174             | 3.60E-05                 | 0.024451                | 0.632691 | 0.839445 |
| <i>Chloroplast</i>           | 0.257463           | 0.000563               | 0.09688               | 0.115893             | 2.60E-05                 | 0.02088                 | 0.181938 | 0.596062 | <i>Chloroplast</i>           | 0.58094              | 0.000558                 | 0.096424                | 0.463733             | 0.000585                 | 0.098742                | 0.428505 | 0.761124 |
| <i>Fimbrimonadia</i>         | 0.23918            | 6.70E-05               | 0.03346               | 0.301164             | 0.000422                 | 0.083837                | 0.553928 | 0.854632 | <i>Fimbrimonadia</i>         | 0.369464             | 0.000112                 | 0.043243                | 0.505261             | 0.000683                 | 0.106729                | 0.273268 | 0.68098  |
| <i>Gemm-1</i>                | 0.22616            | 0.000106               | 0.04203               | 0.290769             | 0.000249                 | 0.064424                | 0.460825 | 0.820395 | <i>Gemm-1</i>                | 0.405866             | 0.00014                  | 0.04837                 | 0.322556             | 2.20E-05                 | 0.018938                | 0.134165 | 0.54182  |
| <i>TK10</i>                  | 0.184673           | 2.20E-05               | 0.01922               | 0.205695             | 3.90E-05                 | 0.025428                | 0.571103 | 0.86872  | <i>TK10</i>                  | 0.169071             | 9.00E-06                 | 0.012422                | 0.177655             | 1.80E-05                 | 0.017293                | 0.704124 | 0.901622 |
| <i>Acidimicrobiia</i>        | 0.178729           | 3.40E-05               | 0.02373               | 0.193334             | 9.10E-05                 | 0.039042                | 0.794536 | 0.975112 | <i>Acidimicrobiia</i>        | 0.260725             | 1.90E-05                 | 0.017818                | 0.252307             | 6.60E-05                 | 0.033127                | 0.829371 | 0.925797 |
| <i>Chlamydiia</i>            | 0.175353           | 0.000105               | 0.04177               | 0.282466             | 0.000195                 | 0.057001                | 0.156031 | 0.596062 | <i>Chlamydiia</i>            | 0.298994             | 0.000173                 | 0.053703                | 0.37216              | 6.50E-05                 | 0.032823                | 0.279505 | 0.68098  |
| <i>Elusimicrobia</i>         | 0.160763           | 6.70E-05               | 0.03334               | 0.241095             | 0.000104                 | 0.041627                | 0.15868  | 0.596062 | <i>Elusimicrobia</i>         | 0.232576             | 4.50E-05                 | 0.027317                | 0.255978             | 8.70E-05                 | 0.038118                | 0.637495 | 0.839445 |
| <i>PRR-12</i>                | 0.153693           | 0.000151               | 0.05023               | 0.061129             | 3.30E-05                 | 0.02344                 | 0.111856 | 0.596062 | <i>PRR-12</i>                | 0.154478             | 2.80E-05                 | 0.021433                | 0.062375             | 1.40E-05                 | 0.015274                | 0.004412 | 0.461664 |
| <i>Ellin6529</i>             | 0.126487           | 6.50E-05               | 0.03288               | 0.075668             | 2.40E-05                 | 0.020195                | 0.221598 | 0.625389 | <i>Ellin6529</i>             | 0.135292             | 1.70E-05                 | 0.016795                | 0.095099             | 3.20E-05                 | 0.023257                | 0.190845 | 0.658737 |
| <i>C0119</i>                 | 0.126275           | 1.10E-05               | 0.01368               | 0.105913             | 1.60E-05                 | 0.016161                | 0.395598 | 0.791196 | <i>C0119</i>                 | 0.234887             | 3.40E-05                 | 0.023793                | 0.230139             | 0.000111                 | 0.043099                | 0.920412 | 0.938284 |



|                          |          |   |         |          |          |          |          |          |
|--------------------------|----------|---|---------|----------|----------|----------|----------|----------|
| <i>TM1</i>               | 0.004768 | 0 | 0.00138 | 0.00671  | 0        | 0.001464 | 0.393763 | 0.791196 |
| <i>SHA-37</i>            | 0.004189 | 0 | 0.00095 | 0.00429  | 0        | 0.001967 | 0.962289 | 1        |
| <i>Gemm-2</i>            | 0.004006 | 0 | 0.00095 | 0.005554 | 0        | 0.001998 | 0.545814 | 0.854632 |
| <i>OP11-3</i>            | 0.003445 | 0 | 0.00131 | 0.007452 | 1.00E-06 | 0.003901 | 0.386412 | 0.791196 |
| <i>SBRH58</i>            | 0.003116 | 0 | 0.00249 | 0.004635 | 0        | 0.002633 | 0.729845 | 0.96858  |
| <i>Leptospirae</i>       | 0.003081 | 0 | 0.00083 | 0.006044 | 1.00E-06 | 0.003959 | 0.523577 | 0.854632 |
| <i>SJA-28</i>            | 0.001428 | 0 | 0.0009  | 0.00035  | 0        | 0.00035  | 0.31567  | 0.725369 |
| <i>BPC102</i>            | 0.001112 | 0 | 0.00078 | 0        | 0        | 0        | 0.138432 | 0.596062 |
| <i>JG37-AG-4</i>         | 0.001085 | 0 | 0.00041 | 0.001037 | 0        | 0.000697 | 1        | 1        |
| <i>SJA-176</i>           | 0.000743 | 0 | 0.00074 | 0.000366 | 0        | 0.000366 | 1        | 1        |
| <i>Endomicrobia</i>      | 0.000735 | 0 | 0.00074 | 0.000366 | 0        | 0.000366 | 1        | 1        |
| <i>Methylacidiphilae</i> | 0.000735 | 0 | 0.00074 | 0.000713 | 0        | 0.000452 | 1        | 1        |
| <i>BSV26</i>             | 0.000714 | 0 | 0.00045 | 0.000732 | 0        | 0.000732 | 1        | 1        |
| <i>SHA-109</i>           | 0.000531 | 0 | 0.00037 | 0.001098 | 0        | 0.001098 | 0.658278 | 0.911462 |
| <i>Mb-NB09</i>           | 0.000383 | 0 | 0.00038 | 0.00818  | 1.00E-06 | 0.004701 | 0.118361 | 0.596062 |
| <i>AT-s54</i>            | 0.000368 | 0 | 0.00037 | 0.003206 | 0        | 0.002226 | 0.248577 | 0.654788 |
| <i>3BR-5F</i>            | 0.000173 | 0 | 0.00017 | 0.003261 | 0        | 0.002517 | 0.263804 | 0.660173 |
| <i>CK-1C4-19</i>         | 0.000173 | 0 | 0.00017 | 0.001133 | 0        | 0.001133 | 0.322729 | 0.72614  |
| <i>At12OctB3</i>         | 0        | 0 | 0       | 0.001345 | 0        | 0.000995 | 0.035212 | 0.456496 |
| <i>Deinococci</i>        | 0        | 0 | 0       | 0.000671 | 0        | 0.000671 | 0.187649 | 0.596062 |
| <i>OP11-4</i>            | 0        | 0 | 0       | 0.000673 | 0        | 0.000673 | 0.187649 | 0.596062 |
| <i>Verruco-5</i>         | 0        | 0 | 0       | 0.000732 | 0        | 0.000732 | 0.187649 | 0.596062 |

Note 1. SUM of relative abundances of major bacterial classes in Z31DRh and Z31J1DRh

98.7044

98.618589

Note 2. SUM of relative abundances of major bacterial classes in Z31DSO and Z31J1DSO.

98.254213

98.360744

Note 3. Digits with red color indicated that the relative abundances of the taxon was significantly different between Z31DRh and Z31J1DRh.





|                             |          |          |          |          |          |          |          |         |
|-----------------------------|----------|----------|----------|----------|----------|----------|----------|---------|
| <i>Rhodocyclaceae</i>       | 0.383889 | 0.001032 | 0.131158 | 0.281264 | 0.000406 | 0.082296 | 0.568515 | 0.86472 |
| <i>Kouleothrixaceae</i>     | 0.359628 | 9.50E-05 | 0.039784 | 0.227863 | 8.20E-05 | 0.037027 | 0.024613 | 0.41462 |
| <i>Phormidiaceae</i>        | 0.337274 | 0.002907 | 0.220126 | 0.029862 | 3.00E-05 | 0.022239 | 0.18327  | 0.65758 |
| <i>Gemmataceae</i>          | 0.328655 | 7.30E-05 | 0.034997 | 0.316873 | 3.60E-05 | 0.024462 | 0.815202 | 0.9705  |
| <i>Rhizobiaceae</i>         | 0.322539 | 0.00021  | 0.059209 | 0.17913  | 0.000157 | 0.05112  | 0.081067 | 0.55399 |
| <i>Pirellulaceae</i>        | 0.258828 | 8.10E-05 | 0.036716 | 0.220628 | 3.70E-05 | 0.024912 | 0.452571 | 0.82743 |
| <i>Frankiaceae</i>          | 0.249466 | 0.00033  | 0.074161 | 0.316287 | 0.000377 | 0.079292 | 0.602871 | 0.88343 |
| <i>Fimbrimonadaceae</i>     | 0.23918  | 6.70E-05 | 0.033463 | 0.301164 | 0.000422 | 0.083837 | 0.554902 | 0.86182 |
| <i>Paenibacillaceae</i>     | 0.233197 | 0.00019  | 0.056264 | 0.530909 | 0.002833 | 0.217295 | 0.205067 | 0.65758 |
| <i>Polyangiaceae</i>        | 0.209134 | 1.50E-05 | 0.015812 | 0.232221 | 3.60E-05 | 0.024371 | 0.490387 | 0.82987 |
| <i>Syntrophobacteraceae</i> | 0.197707 | 0.000179 | 0.054604 | 0.189272 | 0.000143 | 0.048819 | 0.918804 | 0.9705  |
| <i>Acetobacteraceae</i>     | 0.192459 | 2.00E-05 | 0.018036 | 0.246752 | 4.30E-05 | 0.026833 | 0.107988 | 0.57488 |
| <i>Intrasporangiaceae</i>   | 0.191243 | 3.40E-05 | 0.023857 | 0.179467 | 3.20E-05 | 0.022943 | 0.766282 | 0.94998 |
| <i>Planctomycetaceae</i>    | 0.190599 | 5.30E-05 | 0.029633 | 0.149924 | 8.00E-06 | 0.011341 | 0.223356 | 0.66033 |
| <i>Planococcaceae</i>       | 0.181657 | 5.40E-05 | 0.029875 | 0.195635 | 0.000114 | 0.043561 | 0.822859 | 0.9705  |
| <i>Pseudonocardiaceae</i>   | 0.18106  | 5.00E-05 | 0.028905 | 0.247874 | 0.000367 | 0.078207 | 0.485957 | 0.82987 |
| <i>0319-6A21</i>            | 0.170247 | 0.000144 | 0.049018 | 0.115315 | 5.10E-05 | 0.029105 | 0.392497 | 0.78129 |
| <i>Methylophilaceae</i>     | 0.155167 | 2.40E-05 | 0.020046 | 0.293225 | 0.000186 | 0.055621 | 0.028669 | 0.41462 |
| <i>auto67_4W</i>            | 0.143322 | 4.70E-05 | 0.028061 | 0.105744 | 1.70E-05 | 0.016975 | 0.281933 | 0.67324 |
| <i>Phyllobacteriaceae</i>   | 0.142944 | 1.20E-05 | 0.014201 | 0.139812 | 4.60E-05 | 0.027747 | 0.927601 | 0.9705  |
| <i>Myxococcaceae</i>        | 0.140741 | 2.60E-05 | 0.020726 | 0.23959  | 0.000161 | 0.051826 | 0.091687 | 0.55399 |
| <i>Mycobacteriaceae</i>     | 0.131889 | 5.70E-05 | 0.030742 | 0.088811 | 1.20E-05 | 0.014095 | 0.22619  | 0.66033 |
| <i>Nitrosomonadaceae</i>    | 0.125021 | 2.80E-05 | 0.021634 | 0.186274 | 3.10E-05 | 0.022648 | 0.062571 | 0.51479 |
| <i>Xanthobacteraceae</i>    | 0.119016 | 8.90E-05 | 0.038414 | 0.055349 | 1.00E-06 | 0.004733 | 0.114387 | 0.58686 |
| <i>Bdellovibrionaceae</i>   | 0.117312 | 2.70E-05 | 0.02106  | 0.098827 | 5.00E-06 | 0.008828 | 0.482012 | 0.82987 |
| <i>Bacillaceae</i>          | 0.110387 | 2.70E-05 | 0.021103 | 0.12577  | 2.80E-05 | 0.021467 | 0.667061 | 0.89628 |
| <i>Neisseriaceae</i>        | 0.109256 | 0.00013  | 0.046527 | 0.146455 | 0.000116 | 0.043913 | 0.62216  | 0.88343 |
| <i>Armatimonadaceae</i>     | 0.096176 | 1.10E-05 | 0.013589 | 0.051499 | 4.00E-06 | 0.007719 | 0.010521 | 0.41462 |
| <i>PRR-10</i>               | 0.093093 | 7.10E-05 | 0.034503 | 0.031137 | 6.00E-06 | 0.010113 | 0.099497 | 0.57488 |
| <i>Alcaligenaceae</i>       | 0.089824 | 3.80E-05 | 0.025049 | 0.051023 | 3.20E-05 | 0.023244 | 0.286319 | 0.67324 |
| <i>Micrococcaceae</i>       | 0.087959 | 1.90E-05 | 0.017891 | 0.095749 | 4.00E-06 | 0.008472 | 0.73908  | 0.93467 |
| <i>Dolo_23</i>              | 0.081945 | 3.00E-06 | 0.006747 | 0.075933 | 7.00E-06 | 0.010719 | 0.689933 | 0.90491 |
| <i>Isosphaeraceae</i>       | 0.081316 | 1.10E-05 | 0.013393 | 0.101551 | 9.00E-06 | 0.012349 | 0.298577 | 0.67324 |
| <i>mitochondria</i>         | 0.079011 | 5.00E-06 | 0.009086 | 0.070817 | 5.00E-06 | 0.009514 | 0.597577 | 0.88343 |
| <i>Microbacteriaceae</i>    | 0.077472 | 1.00E-05 | 0.012707 | 0.053545 | 1.80E-05 | 0.0175   | 0.300031 | 0.67324 |
| <i>UD5</i>                  | 0.067529 | 4.00E-06 | 0.007655 | 0.068306 | 3.00E-06 | 0.006699 | 0.943577 | 0.97593 |
| <i>Nannocystaceae</i>       | 0.058752 | 0.000165 | 0.052361 | 0.002733 | 0        | 0.001926 | 0.31735  | 0.68381 |
| <i>Cryomorphaceae</i>       | 0.057496 | 2.30E-05 | 0.019385 | 0.02051  | 6.00E-06 | 0.010148 | 0.105436 | 0.57488 |
| <i>EB1017</i>               | 0.050679 | 3.00E-06 | 0.006573 | 0.051327 | 2.00E-06 | 0.005232 | 0.943025 | 0.97593 |
| <i>Pseudanabaenaceae</i>    | 0.047161 | 4.60E-05 | 0.027595 | 0.005523 | 0        | 0.002289 | 0.149577 | 0.60311 |
| <i>Solirubrobacteraceae</i> | 0.045902 | 1.00E-05 | 0.013103 | 0.041312 | 3.00E-06 | 0.006958 | 0.795319 | 0.96613 |
| <i>mb2424</i>               | 0.044116 | 6.00E-06 | 0.010103 | 0.020243 | 1.00E-06 | 0.003832 | 0.037166 | 0.42044 |
| <i>Moraxellaceae</i>        | 0.039652 | 1.60E-05 | 0.016119 | 0.015193 | 2.00E-06 | 0.005268 | 0.166982 | 0.65704 |
| <i>Conexibacteraceae</i>    | 0.039417 | 1.00E-06 | 0.003401 | 0.076129 | 4.70E-05 | 0.027995 | 0.216607 | 0.65758 |

|                            |          |          |          |          |          |          |          |         |
|----------------------------|----------|----------|----------|----------|----------|----------|----------|---------|
| <i>Brucellaceae</i>        | 0.038937 | 1.40E-05 | 0.015502 | 0.013809 | 2.00E-06 | 0.005434 | 0.142466 | 0.60311 |
| <i>Rhabdochlamydiaceae</i> | 0.037935 | 7.00E-06 | 0.01111  | 0.058469 | 8.00E-06 | 0.011266 | 0.217982 | 0.65758 |
| <i>Patulibacteraceae</i>   | 0.037033 | 2.00E-06 | 0.005039 | 0.045067 | 3.00E-06 | 0.007154 | 0.418761 | 0.79788 |
| <i>Ktedonobacteraceae</i>  | 0.035235 | 1.00E-05 | 0.012833 | 0.045315 | 2.00E-06 | 0.005571 | 0.537123 | 0.85139 |
| <i>Cystobacterineae</i>    | 0.033694 | 3.00E-06 | 0.006767 | 0.031614 | 8.00E-06 | 0.011203 | 0.891411 | 0.9705  |
| <i>Anaerolinaceae</i>      | 0.03301  | 3.00E-06 | 0.007598 | 0.01321  | 0        | 0.002756 | 0.023669 | 0.41462 |
| <i>Nostocaceae</i>         | 0.032915 | 1.20E-05 | 0.013846 | 0.003095 | 0        | 0.001544 | 0.04365  | 0.42074 |
| <i>Nocardiaceae</i>        | 0.030018 | 3.00E-06 | 0.007356 | 0.017685 | 3.00E-06 | 0.007267 | 0.260669 | 0.66214 |
| <i>Methylobacteriaceae</i> | 0.029682 | 1.00E-06 | 0.003722 | 0.026807 | 1.00E-06 | 0.004554 | 0.680926 | 0.89962 |
| <i>Geobacteraceae</i>      | 0.028744 | 7.00E-06 | 0.010833 | 0.046767 | 9.80E-05 | 0.040407 | 0.716466 | 0.91972 |
| <i>Clostridiaceae</i>      | 0.028712 | 1.00E-06 | 0.004108 | 0.034365 | 5.00E-06 | 0.008901 | 0.624748 | 0.88343 |
| <i>HTCC2089</i>            | 0.027906 | 3.00E-06 | 0.006791 | 0.019917 | 2.00E-06 | 0.005317 | 0.414571 | 0.79788 |
| <i>Caldilineaceae</i>      | 0.025523 | 1.00E-06 | 0.004351 | 0.014538 | 0        | 0.002851 | 0.046491 | 0.42074 |
| <i>RB40</i>                | 0.024872 | 8.00E-06 | 0.011384 | 0.037036 | 3.00E-06 | 0.006782 | 0.418779 | 0.79788 |
| <i>C111</i>                | 0.024597 | 1.00E-06 | 0.004846 | 0.026633 | 9.00E-06 | 0.012    | 0.892368 | 0.9705  |
| <i>Anaeroplasmataceae</i>  | 0.02387  | 1.00E-06 | 0.00341  | 0.03303  | 7.00E-06 | 0.010829 | 0.483221 | 0.82987 |
| <i>Bacteriovoraceae</i>    | 0.021353 | 2.00E-06 | 0.005956 | 0.006342 | 0        | 0.002117 | 0.026595 | 0.41462 |
| <i>Spirochaetaceae</i>     | 0.020269 | 1.00E-06 | 0.004528 | 0.020258 | 1.00E-06 | 0.00485  | 0.992914 | 1       |
| <i>Geodermatophilaceae</i> | 0.020214 | 1.00E-06 | 0.003071 | 0.035425 | 1.00E-06 | 0.003865 | 0.007098 | 0.41462 |
| <i>Alteromonadaceae</i>    | 0.019965 | 2.00E-06 | 0.00603  | 0.016187 | 1.00E-06 | 0.004096 | 0.661834 | 0.89628 |
| <i>FFCH4570</i>            | 0.018429 | 1.00E-06 | 0.003359 | 0.035451 | 3.00E-06 | 0.006483 | 0.028847 | 0.41462 |
| <i>Piscirickettsiaceae</i> | 0.017763 | 2.00E-06 | 0.005191 | 0.014404 | 1.00E-06 | 0.00409  | 0.668933 | 0.89628 |
| <i>Legionellaceae</i>      | 0.017262 | 2.00E-06 | 0.005122 | 0.007608 | 0        | 0.001568 | 0.085387 | 0.55399 |
| <i>Fusobacteriaceae</i>    | 0.017086 | 9.00E-06 | 0.012398 | 0.000673 | 0        | 0.000673 | 0.208448 | 0.65758 |
| <i>Erythrobacteraceae</i>  | 0.015452 | 0        | 0.002861 | 0.023422 | 0        | 0.001832 | 0.028196 | 0.41462 |
| <i>Cerasiococcaceae</i>    | 0.015233 | 6.00E-06 | 0.009954 | 0.011175 | 1.00E-06 | 0.003312 | 0.743601 | 0.93467 |
| <i>Alicyclobacillaceae</i> | 0.013967 | 0        | 0.001866 | 0.015097 | 0        | 0.002821 | 0.779853 | 0.95374 |
| <i>0319-6G20</i>           | 0.011928 | 1.00E-06 | 0.003555 | 0.004755 | 0        | 0.001935 | 0.091393 | 0.55399 |
| <i>Thermogemmatimonas</i>  | 0.011231 | 1.00E-06 | 0.003515 | 0.023942 | 6.00E-06 | 0.010088 | 0.261767 | 0.66214 |
| <i>Actinosynnemataceae</i> | 0.009202 | 1.00E-06 | 0.002951 | 0.008458 | 0        | 0.002554 | 0.870865 | 0.9705  |
| <i>Parachlamydiaceae</i>   | 0.009062 | 1.00E-06 | 0.003861 | 0.008412 | 0        | 0.002219 | 0.899092 | 0.9705  |
| <i>EB1003</i>              | 0.00849  | 0        | 0.001859 | 0.01045  | 1.00E-06 | 0.004065 | 0.711681 | 0.91972 |
| <i>Procabacteriaceae</i>   | 0.007977 | 1.00E-06 | 0.00444  | 0.025615 | 1.50E-05 | 0.015888 | 0.317344 | 0.68381 |
| <i>Bacteroidaceae</i>      | 0.007791 | 4.00E-06 | 0.007791 | 0.000338 | 0        | 0.000338 | 0.395994 | 0.78129 |
| <i>Aurantimonadaceae</i>   | 0.00755  | 0        | 0.002694 | 0.004101 | 0        | 0.002836 | 0.439859 | 0.82167 |
| <i>OM27</i>                | 0.007056 | 1.00E-06 | 0.003205 | 0.006432 | 0        | 0.002215 | 0.890656 | 0.9705  |
| <i>Holophagaceae</i>       | 0.006933 | 0        | 0.002033 | 0.033618 | 1.30E-05 | 0.014936 | 0.091822 | 0.55399 |
| <i>Methylocystaceae</i>    | 0.006006 | 0        | 0.001734 | 0.004207 | 0        | 0.001113 | 0.444883 | 0.82167 |
| <i>Sporichthyaceae</i>     | 0.005838 | 0        | 0.001384 | 0.007646 | 1.00E-06 | 0.003192 | 0.660939 | 0.89628 |
| <i>Aeromonadaceae</i>      | 0.005787 | 1.00E-06 | 0.003812 | 0.002403 | 0        | 0.001216 | 0.463687 | 0.82987 |
| <i>Hyphomonadaceae</i>     | 0.005684 | 1.00E-06 | 0.003435 | 0.004945 | 0        | 0.002641 | 0.882859 | 0.9705  |
| <i>Entotheonellaceae</i>   | 0.005449 | 0        | 0.002192 | 0.005971 | 0        | 0.001452 | 0.866362 | 0.9705  |
| <i>Nakamurellaceae</i>     | 0.005393 | 0        | 0.001319 | 0.010123 | 1.00E-06 | 0.004004 | 0.292141 | 0.67324 |
| <i>Peptococcaceae</i>      | 0.005296 | 0        | 0.002266 | 0.003559 | 0        | 0.001183 | 0.558693 | 0.86182 |

|                              |          |          |          |          |          |          |          |         |
|------------------------------|----------|----------|----------|----------|----------|----------|----------|---------|
| <i>Rubrobacteraceae</i>      | 0.005261 | 0        | 0.001756 | 0.005303 | 0        | 0.002474 | 0.983577 | 1       |
| <i>Phycisphaeraceae</i>      | 0.005126 | 0        | 0.001284 | 0.004183 | 0        | 9.00E-04 | 0.610926 | 0.88343 |
| <i>Shewanellaceae</i>        | 0.004819 | 0        | 0.002763 | 0.010511 | 0        | 0.002204 | 0.121896 | 0.5963  |
| <i>Lachnospiraceae</i>       | 0.004793 | 0        | 0.002532 | 0.002416 | 0        | 0.000976 | 0.442822 | 0.82167 |
| <i>Chlamydomonadaceae</i>    | 0.004636 | 0        | 0.001173 | 0.00524  | 0        | 0.00165  | 0.801847 | 0.96756 |
| <i>5B-12</i>                 | 0.004292 | 0        | 0.001129 | 0.00349  | 0        | 0.00176  | 0.758245 | 0.9465  |
| <i>NB1-i</i>                 | 0.004188 | 0        | 0.001952 | 0.002908 | 0        | 0.00136  | 0.648939 | 0.89628 |
| <i>Streptosporangiaceae</i>  | 0.004151 | 0        | 0.001888 | 0.003127 | 0        | 0.000678 | 0.667656 | 0.89628 |
| <i>Pedosphaeraceae</i>       | 0.003779 | 0        | 0.001893 | 0.007474 | 0        | 0.002405 | 0.256202 | 0.66214 |
| <i>Thermoactinomyces</i>     | 0.003653 | 0        | 0.001584 | 0.003185 | 0        | 0.00095  | 0.830933 | 0.9705  |
| <i>Cellulomonadaceae</i>     | 0.003461 | 0        | 0.00249  | 0.000675 | 0        | 0.000427 | 0.301564 | 0.67324 |
| <i>Rickettsiaceae</i>        | 0.003409 | 0        | 0.001506 | 0.007516 | 1.00E-06 | 0.002925 | 0.237785 | 0.66214 |
| <i>Ruminococcaceae</i>       | 0.003249 | 0        | 0.000895 | 0.001352 | 0        | 0.001004 | 0.177221 | 0.65758 |
| <i>Amoebophilaceae</i>       | 0.003125 | 0        | 0.002292 | 0.002761 | 0        | 0.001012 | 0.899387 | 0.9705  |
| <i>Leptospiraceae</i>        | 0.003081 | 0        | 0.000827 | 0.006044 | 1.00E-06 | 0.003959 | 0.529663 | 0.85139 |
| <i>Kineosporiaceae</i>       | 0.003063 | 0        | 0.000718 | 0.003856 | 0        | 0.000848 | 0.540147 | 0.85139 |
| <i>Mycoplasmataceae</i>      | 0.002909 | 1.00E-06 | 0.002909 | 0        | 0        | 0        | 0.35584  | 0.72368 |
| <i>Thermomonosporaceae</i>   | 0.002897 | 0        | 0.001083 | 0.001421 | 0        | 0.000691 | 0.280975 | 0.67324 |
| <i>S47</i>                   | 0.002869 | 0        | 0.001542 | 0.000732 | 0        | 0.000732 | 0.236184 | 0.66214 |
| <i>AKIW659</i>               | 0.002444 | 0        | 0.001842 | 0.001741 | 0        | 0.000846 | 0.772331 | 0.95097 |
| <i>Cystobacteraceae</i>      | 0.002341 | 0        | 0.000813 | 0.001711 | 0        | 0.000963 | 0.673448 | 0.89628 |
| <i>Peptostreptococcaceae</i> | 0.002282 | 0        | 0.001127 | 0.002064 | 0        | 0.000904 | 0.902847 | 0.9705  |
| <i>Oscillochloridaceae</i>   | 0.002163 | 0        | 0.001755 | 0        | 0        | 0        | 0.243595 | 0.66214 |
| <i>R4-41B</i>                | 0.002163 | 0        | 0.000969 | 0.001742 | 0        | 0.001123 | 0.810129 | 0.9705  |
| <i>Bryobacteraceae</i>       | 0.001959 | 0        | 0.000967 | 0.003094 | 0        | 0.001267 | 0.540939 | 0.85139 |
| <i>Gracilibacteraceae</i>    | 0.001811 | 0        | 0.000364 | 0.001359 | 0        | 0.000674 | 0.617767 | 0.88343 |
| <i>FFCH7168</i>              | 0.001747 | 0        | 0.00087  | 0.001039 | 0        | 0.000699 | 0.589675 | 0.88343 |
| <i>Beijerinckiaceae</i>      | 0.001436 | 0        | 0.000729 | 0.001025 | 0        | 0.000458 | 1        | 1       |
| <i>Beutenbergiaceae</i>      | 0.001433 | 0        | 0.001433 | 0        | 0        | 0        | 0.138432 | 0.60311 |
| <i>JTB36</i>                 | 0.001304 | 0        | 0.000749 | 0.004264 | 0        | 0.001175 | 0.045074 | 0.42074 |
| <i>AKIW874</i>               | 0.001276 | 0        | 0.001082 | 0        | 0        | 0        | 0.138432 | 0.60311 |
| <i>Rhodobiaceae</i>          | 0.000937 | 0        | 0.000751 | 0.001742 | 0        | 0.001123 | 0.305005 | 0.67324 |
| <i>Syntrophomonadaceae</i>   | 0.00089  | 0        | 0.000703 | 0        | 0        | 0        | 0.263392 | 0.66214 |
| <i>kpj58rc</i>               | 0.000887 | 0        | 0.000702 | 0        | 0        | 0        | 0.263392 | 0.66214 |
| <i>FW</i>                    | 0.000887 | 0        | 0.000573 | 0.000366 | 0        | 0.000366 | 0.39712  | 0.78129 |
| <i>MVS-65</i>                | 0.000766 | 0        | 0.000766 | 0        | 0        | 0        | 0.508928 | 0.82987 |
| <i>Blattabacteriaceae</i>    | 0.000743 | 0        | 0.000743 | 0        | 0        | 0        | 0.508928 | 0.82987 |
| <i>Caldicoprobacteraceae</i> | 0.000735 | 0        | 0.000735 | 0        | 0        | 0        | 0.508928 | 0.82987 |
| <i>Simkaniaceae</i>          | 0.000735 | 0        | 0.000735 | 0        | 0        | 0        | 0.508928 | 0.82987 |
| <i>SHA-31</i>                | 0.000735 | 0        | 0.000735 | 0.000337 | 0        | 0.000337 | 1        | 1       |
| <i>Veillonellaceae</i>       | 0.000346 | 0        | 0.000346 | 0.003745 | 1.00E-06 | 0.003312 | 0.345123 | 0.72368 |
| <i>Desulfovibrionaceae</i>   | 0.000346 | 0        | 0.000346 | 0        | 0        | 0        | 0.508928 | 0.82987 |
| <i>Criblamydiaceae</i>       | 0.000342 | 0        | 0.000342 | 0.000671 | 0        | 0.000671 | 1        | 1       |
| <i>Promicromonospora</i>     | 0.000171 | 0        | 0.000171 | 0.004492 | 0        | 0.002548 | 0.105    | 0.57488 |

|                           |          |   |          |          |          |          |          |         |
|---------------------------|----------|---|----------|----------|----------|----------|----------|---------|
| <i>Streptococcaceae</i>   | 0.000171 | 0 | 0.000171 | 0.007826 | 3.00E-06 | 0.006959 | 0.303147 | 0.67324 |
| <i>Gemellaceae</i>        | 0        | 0 | 0        | 0.001684 | 0        | 0.001684 | 0.015253 | 0.41462 |
| <i>211ds20</i>            | 0        | 0 | 0        | 0.001405 | 0        | 0.00089  | 0.035212 | 0.42044 |
| <i>Prevotellaceae</i>     | 0        | 0 | 0        | 0.002947 | 0        | 0.001588 | 0.076988 | 0.55399 |
| <i>Turicibacteraceae</i>  | 0        | 0 | 0        | 0.001015 | 0        | 0.001015 | 0.081286 | 0.55399 |
| <i>Deinococcaceae</i>     | 0        | 0 | 0        | 0.000671 | 0        | 0.000671 | 0.187649 | 0.65758 |
| <i>Leptotrichiaceae</i>   | 0        | 0 | 0        | 0.000673 | 0        | 0.000673 | 0.187649 | 0.65758 |
| <i>Hydrogenophilaceae</i> | 0        | 0 | 0        | 0.009169 | 3.00E-06 | 0.007472 | 0.248209 | 0.66214 |
| <i>Saprosiraceae</i>      | 0        | 0 | 0        | 0.00306  | 0        | 0.002645 | 0.273472 | 0.67324 |
| <i>Desulfobulbaceae</i>   | 0        | 0 | 0        | 0.002196 | 0        | 0.002196 | 0.35584  | 0.72368 |
| <i>Pasteurellaceae</i>    | 0        | 0 | 0        | 0.004377 | 1.00E-06 | 0.004377 | 0.35584  | 0.72368 |

Note 1. SUM of relative abundances of major bacterial families in Z31DRh and Z31J1DRh

82.976674

82.556299

Note 1. SUM of relative abundances of major bacterial families in Z31DSO and Z31J1DSO.

76.756124

78.387135

Note 3. Digits with red color indicated that the relative abundances of the taxon was significantly different between Z31DRh and Z31J1DRh.

Table S8. Differentially relative abundance of bacterial genera between Z31DRh &amp; Z31J1DRh under systematic contrast(16S)

| Genus                        | mean of Z31DRh (%) | variance of Z31DRh (%) | std.err of Z31DRh (%) | mean of Z31J1DRh (%) | variance of Z31J1DRh (%) | std.err of Z31J1DRh (%) | p -value | FDR      | Genus                        | mean of Z31DSO (%) | variance of Z31DSO (%) | std.err of Z31DSO (%) | mean of Z31J1DSO (%) | variance of Z31J1DSO (%) | std.err of Z31J1DSO (%) | p -value | FDR      |
|------------------------------|--------------------|------------------------|-----------------------|----------------------|--------------------------|-------------------------|----------|----------|------------------------------|--------------------|------------------------|-----------------------|----------------------|--------------------------|-------------------------|----------|----------|
| <i>Candidatus_Koribacter</i> | 2.172926           | 0.002582               | 0.207426              | 3.637111             | 0.014839                 | 0.497307                | 0.013264 | 0.514066 | <i>Candidatus_Koribacter</i> | 3.421781           | 0.01233                | 0.45333               | 5.096233             | 0.01414                  | 0.48546                 | 0.023082 | 0.702747 |
| <i>Burkholderia</i>          | 0.805959           | 0.000786               | 0.11448               | 1.139264             | 0.000774                 | 0.113578                | 0.047444 | 0.546803 | <i>Burkholderia</i>          | 0.370188           | 0.000192               | 0.056543              | 0.503716             | 0.000198                 | 0.057432                | 0.116462 | 0.702747 |
| <i>Opitutus</i>              | 0.695120           | 0.000104               | 0.041533              | 0.412054             | 0.000129                 | 0.046415                | 0.000573 | 0.125487 | <i>Opitutus</i>              | 0.475873           | 6.00E-05               | 0.031692              | 0.517703             | 0.000216                 | 0.059956                | 0.591351 | 0.913906 |
| <i>Comamonas</i>             | 0.308888           | 0.000393               | 0.080947              | 0.110912             | 2.30E-05                 | 0.019509                | 0.025713 | 0.514066 | <i>Comamonas</i>             | 0.126141           | 0.000102               | 0.041257              | 0.144225             | 0.000139                 | 0.048059                | 0.798602 | 1        |
| <i>Dyella</i>                | 0.099063           | 6.30E-05               | 0.032422              | 0.028736             | 1.00E-06                 | 0.003557                | 0.039713 | 0.543572 | <i>Dyella</i>                | 0.039208           | 1.40E-05               | 0.015163              | 0.021757             | 3.00E-06                 | 0.007066                | 0.341327 | 0.787755 |
| <i>OR-59</i>                 | 0.067893           | 7.00E-06               | 0.011041              | 0.03055              | 3.00E-06                 | 0.006844                | 0.009719 | 0.514066 | <i>OR-59</i>                 | 0.054524           | 1.30E-05               | 0.01447               | 0.016748             | 2.00E-06                 | 0.006171                | 0.028825 | 0.702747 |
| <i>Enterobacter</i>          | 0.066067           | 4.90E-05               | 0.028574              | 0.001105             | 0                        | 0.000767                | 0.031022 | 0.514066 | ND                           |                    |                        |                       |                      |                          |                         |          |          |
| <i>Segetibacter</i>          | 0.040253           | 3.00E-06               | 0.00689               | 0.072439             | 7.00E-06                 | 0.010432                | 0.017831 | 0.514066 | <i>Segetibacter</i>          | 0.065594           | 3.00E-06               | 0.006941              | 0.088632             | 1.00E-05                 | 0.012863                | 0.137047 | 0.711163 |
| <i>Siphonobacter</i>         | 0.037072           | 5.00E-06               | 0.009113              | 0.010529             | 2.00E-06                 | 0.005806                | 0.022287 | 0.514066 | <i>Siphonobacter</i>         | 0.003434           | 0                      | 0.002278              | 0.006356             | 0                        | 0.00139                 | 0.315456 | 0.787755 |
| <i>Thermomonas</i>           | 0.027731           | 1.00E-06               | 0.003895              | 0.053956             | 3.00E-06                 | 0.007108                | 0.005146 | 0.514066 | <i>Thermomonas</i>           | 0.040615           | 2.00E-06               | 0.005484              | 0.02363              | 0                        | 0.00172                 | 0.010035 | 0.524352 |
| <i>Actinoplanes</i>          | 0.021183           | 2.00E-06               | 0.00503               | 0.008602             | 0                        | 0.002575                | 0.034039 | 0.514066 | <i>Actinoplanes</i>          | 0.00935            | 1.00E-06               | 0.004652              | 0.003874             | 0                        | 0.001968                | 0.320994 | 0.787755 |
| <i>Devosia</i>               | 0.005737           | 0                      | 0.001684              | 0.001362             | 0                        | 0.000679                | 0.024118 | 0.514066 | <i>Devosia</i>               | 0                  | 0                      | 0                     | 0.002201             | 0                        | 0.002201                | 0.362965 | 0.804319 |
| <i>Peredibacter</i>          | 0.004971           | 0                      | 0.001574              | 0.001077             | 0                        | 0.000725                | 0.032820 | 0.514066 | ND                           |                    |                        |                       |                      |                          |                         |          |          |
| <i>Acanthamoeba</i>          | 0.000541           | 0                      | 0.000374              | 0.003794             | 0                        | 0.001329                | 0.026646 | 0.514066 | <i>Acanthamoeba</i>          | 0.010259           | 1.00E-06               | 0.00358               | 0.006909             | 1.00E-06                 | 0.00324                 | 0.545632 | 0.913906 |
| <i>Rothia</i>                | 0                  | 0                      | 0                     | 0.001684             | 0                        | 0.001684                | 0.015252 | 0.514066 | ND                           |                    |                        |                       |                      |                          |                         |          |          |
| <i>Aggregatibacter</i>       | 0                  | 0                      | 0                     | 0.001347             | 0                        | 0.001347                | 0.035210 | 0.514066 | ND                           |                    |                        |                       |                      |                          |                         |          |          |
| <i>Desulfobulbus</i>         | 0                  | 0                      | 0                     | 0.001464             | 0                        | 0.001464                | 0.035210 | 0.514066 | ND                           |                    |                        |                       |                      |                          |                         |          |          |
| <i>Planctomyces</i>          | 0.190633           | 5.30E-05               | 0.029636              | 0.149954             | 8.00E-06                 | 0.011348                | 0.215382 | 0.649378 | <i>Planctomyces</i>          | 0.144524           | 1.40E-05               | 0.015435              | 0.085474             | 4.00E-06                 | 0.008611                | 0.004895 | 0.524352 |
| <i>Luteolibacter</i>         | 0.147817           | 0.000352               | 0.076622              | 0.040844             | 2.50E-05                 | 0.020348                | 0.188506 | 0.63512  | <i>Luteolibacter</i>         | 0.023406           | 2.00E-06               | 0.005079              | 0.004806             | 1.00E-06                 | 0.003817                | 0.010450 | 0.524352 |
| <i>Dokdonella</i>            | 0.309687           | 0.001932               | 0.179425              | 0.204075             | 0.000724                 | 0.109839                | 0.694202 | 0.945884 | <i>Dokdonella</i>            | 0.090495           | 1.40E-05               | 0.015086              | 0.043861             | 2.00E-06                 | 0.005544                | 0.010924 | 0.524352 |
| <i>Azospirillum</i>          | 0.040289           | 2.70E-05               | 0.021146              | 0.003953             | 0                        | 0.001598                | 0.091242 | 0.546803 | <i>Azospirillum</i>          | 0.004117           | 0                      | 0.000712              | 0.001491             | 0                        | 0.00074                 | 0.021632 | 0.702747 |
| <i>Ralstonia</i>             | 1.67874            | 0.010599               | 0.42029               | 1.785367             | 0.027585                 | 0.678044                | 0.914483 | 1        | <i>Ralstonia</i>             | 0.230510           | 3.60E-05               | 0.024544              | 0.359219             | 0.000146                 | 0.04928                 | 0.032415 | 0.702747 |
| <i>Cellulosimicrobium</i>    | 0.000171           | 0                      | 0.000171              | 0.004493             | 0                        | 0.002548                | 0.095382 | 0.546803 | <i>Cellulosimicrobium</i>    | 0.000556           | 0                      | 0.000556              | 0.005222             | 0                        | 0.002055                | 0.041556 | 0.702747 |

Note 1. SUM of relative abundances of bacterial genera with significant difference in Z31DRh or Z31J1DRh.

4.353404      0.544983      5.515986      0.721126

Note 2. SUM of relative abundances of bacterial genera correspondingly in Z31DSO or Z31J1DSO.

4.616967      0.63539      6.431984      0.687526

Note 3. In the rhizosphere soils, only 17 genera, whose p-value were labeled by orange color, were significantly different ( $p < 0.05$ ) between the glyphosate treated line Z31 and its control Z31 without glyphosate treatment

Note 4. The obviously increased or decreased mean value of genera in the rhizosphere soils of control Z31 or the glyphosate treated line Z31 were labeled with red or purple color, respectively, under comparative analysis of the surrounding

Note 5. ND = Not Detected.

| Genus                        | mean of Z31DRh (%) | variance of Z31DRh (%) | std.err of Z31DRh (%) | mean of Z31J1DRh (%) | variance of Z31J1DRh (%) | std.err of Z31J1DRh (%) | <i>p</i> -vlaue | FDR      |
|------------------------------|--------------------|------------------------|-----------------------|----------------------|--------------------------|-------------------------|-----------------|----------|
| <i>Opitutus</i>              | 0.69512            | 0.000104               | 0.041533              | 0.412054             | 0.000129                 | 0.046415                | 0.000573        | 0.125487 |
| <i>Thermomonas</i>           | 0.027731           | 1.00E-06               | 0.003895              | 0.053956             | 3.00E-06                 | 0.007108                | 0.005146        | 0.514066 |
| <i>OR-59</i>                 | 0.067893           | 7.00E-06               | 0.011041              | 0.03055              | 3.00E-06                 | 0.006844                | 0.009719        | 0.514066 |
| <i>Candidatus_Koribacter</i> | 2.172926           | 0.002582               | 0.207426              | 3.637111             | 0.014839                 | 0.497307                | 0.013264        | 0.514066 |
| <i>Rothia</i>                | 0                  | 0                      | 0                     | 0.001684             | 0                        | 0.001684                | 0.015252        | 0.514066 |
| <i>Segetibacter</i>          | 0.040253           | 3.00E-06               | 0.00689               | 0.072439             | 7.00E-06                 | 0.010432                | 0.017831        | 0.514066 |
| <i>Siphonobacter</i>         | 0.037072           | 5.00E-06               | 0.009113              | 0.010529             | 2.00E-06                 | 0.005806                | 0.022287        | 0.514066 |
| <i>Devosia</i>               | 0.005737           | 0                      | 0.001684              | 0.001362             | 0                        | 0.000679                | 0.024118        | 0.514066 |
| <i>Comamonas</i>             | 0.308888           | 0.000393               | 0.080947              | 0.110912             | 2.30E-05                 | 0.019509                | 0.025713        | 0.514066 |
| <i>Acanthamoeba</i>          | 0.000541           | 0                      | 0.000374              | 0.003794             | 0                        | 0.001329                | 0.026646        | 0.514066 |
| <i>Enterobacter</i>          | 0.066067           | 4.90E-05               | 0.028574              | 0.001105             | 0                        | 0.000767                | 0.031022        | 0.514066 |
| <i>Peredibacter</i>          | 0.004971           | 0                      | 0.001574              | 0.001077             | 0                        | 0.000725                | 0.032820        | 0.514066 |
| <i>Actinoplanes</i>          | 0.021183           | 2.00E-06               | 0.00503               | 0.008602             | 0                        | 0.002575                | 0.034039        | 0.514066 |
| <i>Aggregatibacter</i>       | 0                  | 0                      | 0                     | 0.001347             | 0                        | 0.001347                | 0.035210        | 0.514066 |
| <i>Desulfobulbus</i>         | 0                  | 0                      | 0                     | 0.001464             | 0                        | 0.001464                | 0.035210        | 0.514066 |
| <i>Dyella</i>                | 0.099063           | 6.30E-05               | 0.032422              | 0.028736             | 1.00E-06                 | 0.003557                | 0.039713        | 0.543572 |
| <i>Burkholderia</i>          | 0.805959           | 0.000786               | 0.11448               | 1.139264             | 0.000774                 | 0.113578                | 0.047444        | 0.546803 |
| <i>Solitalea</i>             | 0.040248           | 2.20E-05               | 0.019144              | 0.001815             | 0                        | 0.001048                | 0.052837        | 0.546803 |
| <i>Edaphobacter</i>          | 0.009756           | 0                      | 0.002401              | 0.019338             | 1.00E-06                 | 0.004196                | 0.054331        | 0.546803 |
| <i>Rhodanobacter</i>         | 0.002694           | 0                      | 0.001107              | 0.009676             | 1.00E-06                 | 0.003398                | 0.057084        | 0.546803 |
| <i>Asticcacaulis</i>         | 0.009336           | 0                      | 0.002238              | 0.003889             | 0                        | 0.001712                | 0.059006        | 0.546803 |
| <i>Oryzihumus</i>            | 0.005146           | 0                      | 0.001227              | 0.010757             | 0                        | 0.002731                | 0.066051        | 0.546803 |
| <i>Janthinobacterium</i>     | 0.024712           | 1.00E-06               | 0.002889              | 0.034789             | 1.00E-06                 | 0.004537                | 0.066101        | 0.546803 |
| <i>Candidatus_Solibacter</i> | 1.166306           | 0.000519               | 0.093022              | 1.549767             | 0.002015                 | 0.183275                | 0.066994        | 0.546803 |
| <i>Rhizobium</i>             | 0.125225           | 8.40E-05               | 0.037487              | 0.051258             | 1.00E-05                 | 0.013152                | 0.067831        | 0.546803 |

| Genus                               | mean of Z31DRh (%) | variance of Z31DRh (%) | std.err of Z31DRh (%) | mean of Z31J1DRh (%) | variance of Z31J1DRh (%) | std.err of Z31J1DRh (%) | <i>p</i> -value | FDR      |
|-------------------------------------|--------------------|------------------------|-----------------------|----------------------|--------------------------|-------------------------|-----------------|----------|
| <i>Prevotella</i>                   | 0                  | 0                      | 0                     | 0.002947             | 0                        | 0.001589                | 0.068466        | 0.546803 |
| <i>Crocinitomix</i>                 | 0.001838           | 0                      | 0.001838              | 0                    | 0                        | 0                       | 0.073761        | 0.546803 |
| <i>Terriglobus</i>                  | 0.066973           | 3.60E-05               | 0.024494              | 0.02087              | 2.00E-06                 | 0.006394                | 0.074051        | 0.546803 |
| <i>Novosphingobium</i>              | 0.457758           | 0.001523               | 0.159303              | 0.156279             | 0.000122                 | 0.045115                | 0.07414         | 0.546803 |
| <i>Turicibacter</i>                 | 0                  | 0                      | 0                     | 0.001016             | 0                        | 0.001016                | 0.081284        | 0.546803 |
| <i>Anaerolinea</i>                  | 0.017657           | 3.00E-06               | 0.006612              | 0.005838             | 0                        | 0.001287                | 0.084208        | 0.546803 |
| <i>Chitinophaga</i>                 | 2.688741           | 0.09665                | 1.269184              | 0.466952             | 0.002422                 | 0.200919                | 0.088944        | 0.546803 |
| <i>Azospirillum</i>                 | 0.040289           | 2.70E-05               | 0.021146              | 0.003953             | 0                        | 0.001598                | 0.091242        | 0.546803 |
| <i>Terribacillus</i>                | 0.000173           | 0                      | 0.000173              | 0.001768             | 0                        | 0.000861                | 0.091643        | 0.546803 |
| <i>Cellulosimicrobium</i>           | 0.000171           | 0                      | 0.000171              | 0.004493             | 0                        | 0.002548                | 0.095382        | 0.546803 |
| <i>Sphingomonas</i>                 | 0.562216           | 0.000425               | 0.084151              | 0.381034             | 0.000266                 | 0.066525                | 0.096455        | 0.546803 |
| <i>Lupinus</i>                      | 0.013064           | 1.00E-06               | 0.004093              | 0.005296             | 0                        | 0.002116                | 0.097371        | 0.546803 |
| <i>Adhaeribacter</i>                | 0.008092           | 0                      | 0.002086              | 0.003839             | 0                        | 0.001445                | 0.099388        | 0.546803 |
| <i>Fluviicola</i>                   | 0.054235           | 2.30E-05               | 0.019602              | 0.018373             | 5.00E-06                 | 0.009016                | 0.102236        | 0.546803 |
| <i>Niastella</i>                    | 0.919664           | 0.000462               | 0.087748              | 0.657739             | 0.001029                 | 0.130963                | 0.102315        | 0.546803 |
| <i>Kaistobacter</i>                 | 2.810375           | 0.023601               | 0.627175              | 3.917252             | 0.003549                 | 0.243193                | 0.105758        | 0.546803 |
| <i>Elbe</i>                         | 0.013443           | 2.00E-06               | 0.006395              | 0.002748             | 0                        | 0.001356                | 0.108399        | 0.546803 |
| <i>Labrys</i>                       | 0.116187           | 9.00E-05               | 0.038796              | 0.052217             | 2.00E-06                 | 0.006018                | 0.109854        | 0.546803 |
| <i>Chryseobacterium</i>             | 1.272696           | 0.018748               | 0.558994              | 0.329465             | 0.00136                  | 0.150578                | 0.10986         | 0.546803 |
| <i>Shewanella</i>                   | 0.00482            | 0                      | 0.002764              | 0.010513             | 0                        | 0.002205                | 0.114202        | 0.555655 |
| <i>Candidatus_Xiphinematobacter</i> | 0.032194           | 3.00E-06               | 0.007301              | 0.017073             | 2.00E-06                 | 0.006007                | 0.116713        | 0.555655 |
| <i>Phaeospirillum</i>               | 0.00333            | 0                      | 0.002116              | 0                    | 0                        | 0                       | 0.123258        | 0.57433  |
| <i>Ochrobactrum</i>                 | 0.038944           | 1.40E-05               | 0.015504              | 0.013811             | 2.00E-06                 | 0.005434                | 0.133584        | 0.594448 |
| <i>Flavisolibacter</i>              | 1.417275           | 0.000685               | 0.106886              | 1.803985             | 0.003214                 | 0.231448                | 0.136404        | 0.594448 |
| <i>Salana</i>                       | 0.001433           | 0                      | 0.001433              | 0                    | 0                        | 0                       | 0.138433        | 0.594448 |

| Genus                       | mean of Z31DRh (%) | variance of Z31DRh (%) | std.err of Z31DRh (%) | mean of Z31J1DRh (%) | variance of Z31J1DRh (%) | std.err of Z31J1DRh (%) | <i>p</i> -vlaue | FDR      |
|-----------------------------|--------------------|------------------------|-----------------------|----------------------|--------------------------|-------------------------|-----------------|----------|
| <i>heteroC45_4W</i>         | 0.001078           | 0                      | 0.000746              | 0                    | 0                        | 0                       | 0.138433        | 0.594448 |
| <i>Legionella</i>           | 0.003402           | 0                      | 0.001163              | 0.001406             | 0                        | 0.000721                | 0.151556        | 0.619539 |
| <i>Paenibacillus</i>        | 0.14963            | 0.000108               | 0.042387              | 0.389685             | 0.001555                 | 0.16099                 | 0.155208        | 0.619539 |
| <i>Leptolyngbya</i>         | 0.009797           | 2.00E-06               | 0.005545              | 0.001796             | 0                        | 0.000688                | 0.158118        | 0.619539 |
| <i>Unclassified</i>         | 64.17851           | 0.288191               | 2.191618              | 68.288321            | 0.2061                   | 1.853377                | 0.158129        | 0.619539 |
| <i>Cetobacterium</i>        | 0.01501            | 7.00E-06               | 0.010493              | 0                    | 0                        | 0                       | 0.158421        | 0.619539 |
| <i>Desulfosporosinus</i>    | 0.003311           | 0                      | 0.001268              | 0.001006             | 0                        | 0.001006                | 0.16327         | 0.627301 |
| <i>Phormidium</i>           | 0.334871           | 0.002881               | 0.219113              | 0.027477             | 2.50E-05                 | 0.020316                | 0.171702        | 0.63512  |
| <i>Chlamydomonas</i>        | 0.000372           | 0                      | 0.000372              | 0.001409             | 0                        | 0.000892                | 0.173551        | 0.63512  |
| <i>Caulobacter</i>          | 0.159519           | 0.000564               | 0.096952              | 0.025715             | 5.00E-06                 | 0.008966                | 0.178843        | 0.63512  |
| <i>Rhodoplanes</i>          | 0.552245           | 0.000127               | 0.046057              | 0.652737             | 0.000195                 | 0.057053                | 0.180522        | 0.63512  |
| <i>Acidovorax</i>           | 0.218097           | 0.000335               | 0.074758              | 0.100042             | 0.00012                  | 0.044755                | 0.186753        | 0.63512  |
| <i>Deinococcus</i>          | 0                  | 0                      | 0                     | 0.000671             | 0                        | 0.000671                | 0.187645        | 0.63512  |
| <i>Leptotrichia</i>         | 0                  | 0                      | 0                     | 0.000674             | 0                        | 0.000674                | 0.187645        | 0.63512  |
| <i>Luteolibacter</i>        | 0.147817           | 0.000352               | 0.076622              | 0.040844             | 2.50E-05                 | 0.020348                | 0.188506        | 0.63512  |
| <i>Bradyrhizobium</i>       | 1.184853           | 0.006234               | 0.322327              | 0.678573             | 0.002391                 | 0.199621                | 0.196045        | 0.636192 |
| <i>Spirosoma</i>            | 0.016574           | 1.00E-06               | 0.004364              | 0.009835             | 0                        | 0.002554                | 0.196787        | 0.636192 |
| <i>Acinetobacter</i>        | 0.035084           | 1.80E-05               | 0.017349              | 0.011412             | 1.00E-06                 | 0.003993                | 0.197539        | 0.636192 |
| <i>Agrobacterium</i>        | 0.191973           | 7.70E-05               | 0.035877              | 0.122559             | 9.30E-05                 | 0.039331                | 0.206725        | 0.644869 |
| <i>Candidatus_Rhizobium</i> | 0.037941           | 7.00E-06               | 0.011112              | 0.058482             | 8.00E-06                 | 0.011271                | 0.208787        | 0.644869 |
| <i>Pythium</i>              | 0.019235           | 1.00E-06               | 0.004555              | 0.011463             | 1.00E-06                 | 0.003893                | 0.209067        | 0.644869 |
| <i>Planctomyces</i>         | 0.190633           | 5.30E-05               | 0.029636              | 0.149954             | 8.00E-06                 | 0.011348                | 0.215382        | 0.649378 |
| <i>Mycobacterium</i>        | 0.131913           | 5.70E-05               | 0.030747              | 0.088826             | 1.20E-05                 | 0.014095                | 0.218393        | 0.649378 |
| <i>Nocardia</i>             | 0.025567           | 2.00E-06               | 0.006432              | 0.014278             | 2.00E-06                 | 0.006212                | 0.223354        | 0.649378 |
| <i>JG37-AG-70</i>           | 0.003789           | 0                      | 0.000685              | 0.002134             | 0                        | 0.001122                | 0.224685        | 0.649378 |



| Genus                   | mean of Z31DRh (%) | variance of Z31DRh (%) | std.err of Z31DRh (%) | mean of Z31J1DRh (%) | variance of Z31J1DRh (%) | std.err of Z31J1DRh (%) | <i>p</i> -vlaue | FDR      |
|-------------------------|--------------------|------------------------|-----------------------|----------------------|--------------------------|-------------------------|-----------------|----------|
| <i>Lysobacter</i>       | 0.028078           | 8.00E-06               | 0.011467              | 0.013053             | 1.00E-06                 | 0.003603                | 0.228169        | 0.649378 |
| <i>Alkanibacter</i>     | 0.0041             | 0                      | 0.002185              | 0.017936             | 7.00E-06                 | 0.010855                | 0.22832         | 0.649378 |
| <i>Oscillochloris</i>   | 0.002163           | 0                      | 0.001755              | 0                    | 0                        | 0                       | 0.234719        | 0.650211 |
| <i>Sorangium</i>        | 0.009926           | 1.00E-06               | 0.004534              | 0.003868             | 0                        | 0.001914                | 0.237803        | 0.650211 |
| <i>Thiobacillus</i>     | 0                  | 0                      | 0                     | 0.00917              | 3.00E-06                 | 0.007472                | 0.239433        | 0.650211 |
| <i>Lacibacter</i>       | 0.015437           | 2.00E-06               | 0.006365              | 0.006928             | 0                        | 0.002753                | 0.240489        | 0.650211 |
| <i>Sphingobium</i>      | 0.008555           | 2.00E-06               | 0.006138              | 0.001077             | 0                        | 0.000725                | 0.249848        | 0.650322 |
| <i>Pedosphaera</i>      | 0.00378            | 0                      | 0.001893              | 0.007476             | 0                        | 0.002406                | 0.251022        | 0.650322 |
| <i>Sphingobacterium</i> | 0.218557           | 0.00055                | 0.095717              | 0.08679              | 0.000171                 | 0.053354                | 0.253517        | 0.650322 |
| <i>Pedomicrobium</i>    | 0.001075           | 0                      | 0.001075              | 0                    | 0                        | 0                       | 0.263393        | 0.650322 |
| <i>Syntrophomonas</i>   | 0.00089            | 0                      | 0.000703              | 0                    | 0                        | 0                       | 0.263393        | 0.650322 |
| <i>Dorea</i>            | 0.000519           | 0                      | 0.000519              | 0                    | 0                        | 0                       | 0.263393        | 0.650322 |
| <i>Buchnera</i>         | 0.000513           | 0                      | 0.000513              | 0                    | 0                        | 0                       | 0.263393        | 0.650322 |
| <i>Rickettsia</i>       | 0.000726           | 0                      | 0.000459              | 0.003734             | 0                        | 0.002521                | 0.268489        | 0.650322 |
| <i>Pantoea</i>          | 1.052743           | 0.047832               | 0.892856              | 0.005604             | 0                        | 0.002277                | 0.269045        | 0.650322 |
| <i>Conexibacter</i>     | 0.033472           | 1.00E-06               | 0.004279              | 0.066105             | 4.60E-05                 | 0.027552                | 0.270225        | 0.650322 |
| <i>Leeia</i>            | 0.002205           | 0                      | 0.001822              | 0.021539             | 1.70E-05                 | 0.016631                | 0.278646        | 0.663299 |
| <i>Achromobacter</i>    | 0.081919           | 4.30E-05               | 0.026724              | 0.040362             | 3.60E-05                 | 0.024378                | 0.282365        | 0.664924 |
| <i>Veillonella</i>      | 0                  | 0                      | 0                     | 0.003746             | 1.00E-06                 | 0.003313                | 0.290309        | 0.676358 |
| <i>Afifella</i>         | 0.000937           | 0                      | 0.000751              | 0.001742             | 0                        | 0.001123                | 0.305001        | 0.68854  |
| <i>Tepidibacter</i>     | 0.000703           | 0                      | 0.000356              | 0.001726             | 0                        | 0.000968                | 0.305001        | 0.68854  |
| <i>Cellulomonas</i>     | 0.003461           | 0                      | 0.002491              | 0.000675             | 0                        | 0.000427                | 0.30614         | 0.68854  |
| <i>Streptococcus</i>    | 0.000171           | 0                      | 0.000171              | 0.007828             | 3.00E-06                 | 0.006961                | 0.3085          | 0.68854  |
| <i>Amycolatopsis</i>    | 0.085338           | 1.50E-05               | 0.01586               | 0.165438             | 0.000305                 | 0.071285                | 0.311258        | 0.68854  |
| <i>Ammoniphilus</i>     | 0.0034             | 0                      | 0.001668              | 0.00681              | 0                        | 0.002685                | 0.318112        | 0.696665 |

| Genus                           | mean of Z31DRh (%) | variance of Z31DRh (%) | std.err of Z31DRh (%) | mean of Z31J1DRh (%) | variance of Z31J1DRh (%) | std.err of Z31J1DRh (%) | <i>p</i> -value | FDR      |
|---------------------------------|--------------------|------------------------|-----------------------|----------------------|--------------------------|-------------------------|-----------------|----------|
| <i>Kineococcus</i>              | 0.000173           | 0                      | 0.000173              | 0.001037             | 0                        | 0.000697                | 0.322727        | 0.699774 |
| <i>Nannocystis</i>              | 0.05766            | 0.000166               | 0.052593              | 0.001724             | 0                        | 0.000968                | 0.325972        | 0.699881 |
| <i>Phenylobacterium</i>         | 0.501511           | 2.00E-04               | 0.05777               | 0.43054              | 7.60E-05                 | 0.035516                | 0.337034        | 0.714744 |
| <i>Hyphomicrobium</i>           | 0.033476           | 3.00E-06               | 0.006962              | 0.042516             | 2.00E-06                 | 0.005225                | 0.341809        | 0.714744 |
| <i>Roseomonas</i>               | 0.00425            | 0                      | 0.001452              | 0.002427             | 0                        | 0.000993                | 0.343           | 0.714744 |
| <i>Filimonas</i>                | 0.192555           | 0.002075               | 0.185948              | 0.001037             | 0                        | 0.000697                | 0.345949        | 0.714744 |
| <i>Aquicella</i>                | 0.224412           | 0.000147               | 0.049424              | 0.364493             | 0.001003                 | 0.129298                | 0.356006        | 0.724928 |
| <i>Patulibacter</i>             | 0.001198           | 0                      | 0.001198              | 0                    | 0                        | 0                       | 0.360809        | 0.724928 |
| <i>Haemophilus</i>              | 0                  | 0                      | 0                     | 0.003031             | 1.00E-06                 | 0.003031                | 0.360809        | 0.724928 |
| <i>Mycoplasma</i>               | 0.002909           | 1.00E-06               | 0.002909              | 0                    | 0                        | 0                       | 0.372045        | 0.734035 |
| <i>SC3-56</i>                   | 0.001711           | 0                      | 0.001711              | 0                    | 0                        | 0                       | 0.372045        | 0.734035 |
| <i>Aminobacter</i>              | 0.001246           | 0                      | 0.001054              | 0.000337             | 0                        | 0.000337                | 0.397123        | 0.75626  |
| <i>Kineosporia</i>              | 0.000896           | 0                      | 0.000576              | 0.000335             | 0                        | 0.000335                | 0.397123        | 0.75626  |
| <i>4/29/2016</i>                | 0.000887           | 0                      | 0.000573              | 0.000366             | 0                        | 0.000366                | 0.397123        | 0.75626  |
| <i>Blautia</i>                  | 0.000693           | 0                      | 0.000693              | 0.00035              | 0                        | 0.00035                 | 0.397123        | 0.75626  |
| <i>Bacteroides</i>              | 0.007792           | 4.00E-06               | 0.007792              | 0.000339             | 0                        | 0.000339                | 0.41159         | 0.774096 |
| <i>Stenotrophomonas</i>         | 0.080699           | 4.30E-05               | 0.026801              | 0.043544             | 5.00E-05                 | 0.028937                | 0.422163        | 0.774096 |
| <i>Niabella</i>                 | 0.181948           | 0.000316               | 0.072576              | 0.10547              | 8.20E-05                 | 0.036997                | 0.42409         | 0.774096 |
| <i>Candidatus_Glomeribacter</i> | 0.001993           | 0                      | 0.000729              | 0.001043             | 0                        | 0.000702                | 0.42418         | 0.774096 |
| <i>Kribbella</i>                | 0.0209             | 2.00E-06               | 0.005526              | 0.028262             | 2.00E-06                 | 0.005613                | 0.426427        | 0.774096 |
| <i>Hymenobacter</i>             | 0.005493           | 0                      | 0.001833              | 0.008828             | 1.00E-06                 | 0.003074                | 0.427697        | 0.774096 |
| <i>Gemmata</i>                  | 0.197433           | 3.00E-05               | 0.022516              | 0.174735             | 9.00E-06                 | 0.011981                | 0.454011        | 0.814987 |
| <i>Bdellovibrio</i>             | 0.115787           | 2.40E-05               | 0.020206              | 0.096799             | 5.00E-06                 | 0.008805                | 0.475264        | 0.824569 |
| <i>FFCH10602</i>                | 0.000513           | 0                      | 0.000513              | 0.001403             | 0                        | 0.000889                | 0.475774        | 0.824569 |
| <i>Chthoniobacter</i>           | 1.237277           | 0.010388               | 0.4161                | 0.814932             | 0.004518                 | 0.274411                | 0.485697        | 0.824569 |

| Genus                     | mean of Z31DRh (%) | variance of Z31DRh (%) | std.err of Z31DRh (%) | mean of Z31J1DRh (%) | variance of Z31J1DRh (%) | std.err of Z31J1DRh (%) | <i>p</i> -vlaue | FDR      |
|---------------------------|--------------------|------------------------|-----------------------|----------------------|--------------------------|-------------------------|-----------------|----------|
| <i>Prostheco bacter</i>   | 0.32366            | 0.001218               | 0.142461              | 0.168636             | 0.000871                 | 0.120471                | 0.494309        | 0.824569 |
| <i>Azospira</i>           | 0.023343           | 2.80E-05               | 0.021626              | 0.005422             | 1.00E-06                 | 0.003465                | 0.500674        | 0.824569 |
| <i>Sporocytophaga</i>     | 0.003473           | 0                      | 0.001395              | 0.002055             | 0                        | 0.001048                | 0.503837        | 0.824569 |
| <i>Asteroleplasma</i>     | 0.023875           | 1.00E-06               | 0.003411              | 0.033038             | 7.00E-06                 | 0.010833                | 0.506584        | 0.824569 |
| <i>Caldicoprobacter</i>   | 0.000735           | 0                      | 0.000735              | 0                    | 0                        | 0                       | 0.508929        | 0.824569 |
| <i>Akkermansia</i>        | 0.000346           | 0                      | 0.000346              | 0                    | 0                        | 0                       | 0.508929        | 0.824569 |
| <i>Bilophila</i>          | 0.000346           | 0                      | 0.000346              | 0                    | 0                        | 0                       | 0.508929        | 0.824569 |
| <i>Faecalibacterium</i>   | 0.000346           | 0                      | 0.000346              | 0                    | 0                        | 0                       | 0.508929        | 0.824569 |
| <i>Oscillospira</i>       | 0.000346           | 0                      | 0.000346              | 0                    | 0                        | 0                       | 0.508929        | 0.824569 |
| <i>Roseburia</i>          | 0.000346           | 0                      | 0.000346              | 0                    | 0                        | 0                       | 0.508929        | 0.824569 |
| <i>Pimelobacter</i>       | 0.003808           | 0                      | 0.000682              | 0.002521             | 0                        | 0.001465                | 0.514034        | 0.824569 |
| <i>Brevundimonas</i>      | 0.001604           | 0                      | 0.001409              | 0.006772             | 2.00E-06                 | 0.006362                | 0.515826        | 0.824569 |
| <i>Perlucidibaca</i>      | 0.004575           | 1.00E-06               | 0.003953              | 0.001415             | 0                        | 0.000687                | 0.520938        | 0.826706 |
| <i>Myxococcus</i>         | 0.001223           | 0                      | 0.000861              | 0.003371             | 0                        | 0.002644                | 0.53518         | 0.835911 |
| <i>Pseudoxanthomonas</i>  | 0.031455           | 3.00E-05               | 0.022244              | 0.013992             | 2.00E-06                 | 0.005614                | 0.541079        | 0.835911 |
| <i>Uliginosibacterium</i> | 0.025034           | 2.00E-06               | 0.005909              | 0.032762             | 4.00E-06                 | 0.008271                | 0.541652        | 0.835911 |
| <i>Actinomycespora</i>    | 0.00127            | 0                      | 0.000442              | 0.002038             | 0                        | 0.000908                | 0.542006        | 0.835911 |
| <i>Turneriella</i>        | 0.003082           | 0                      | 0.000827              | 0.006046             | 1.00E-06                 | 0.00396                 | 0.557798        | 0.85425  |
| <i>Dyadobacter</i>        | 0.197859           | 0.000324               | 0.073504              | 0.132848             | 0.000168                 | 0.052899                | 0.565933        | 0.86069  |
| <i>Inquilinus</i>         | 0.002526           | 0                      | 0.001291              | 0.001429             | 0                        | 0.000906                | 0.577854        | 0.872759 |
| <i>Geothrix</i>           | 0.00164            | 0                      | 0.000786              | 0.002554             | 0                        | 0.001079                | 0.583888        | 0.875832 |
| <i>Pirellula</i>          | 0.136024           | 1.60E-05               | 0.016347              | 0.12084              | 1.50E-05                 | 0.015571                | 0.590601        | 0.879875 |
| <i>Sediminibacterium</i>  | 0.138225           | 1.60E-05               | 0.016156              | 0.156685             | 3.10E-05                 | 0.022905                | 0.5975          | 0.884139 |
| <i>Fusobacterium</i>      | 0.002078           | 0                      | 0.002078              | 0.000674             | 0                        | 0.000674                | 0.606421        | 0.891317 |
| <i>Dechloromonas</i>      | 0.084312           | 3.70E-05               | 0.024953              | 0.110017             | 7.40E-05                 | 0.035198                | 0.637803        | 0.931192 |

| Genus                    | mean of Z31DRh (%) | variance of Z31DRh (%) | std.err of Z31DRh (%) | mean of Z31J1DRh (%) | variance of Z31J1DRh (%) | std.err of Z31J1DRh (%) | <i>p</i> -vlaue | FDR      |
|--------------------------|--------------------|------------------------|-----------------------|----------------------|--------------------------|-------------------------|-----------------|----------|
| <i>Cryocola</i>          | 0.017093           | 0                      | 0.002401              | 0.014548             | 1.00E-06                 | 0.003844                | 0.656596        | 0.945884 |
| <i>Rickettsiella</i>     | 0.007915           | 1.00E-06               | 0.004848              | 0.013654             | 5.00E-06                 | 0.009131                | 0.660275        | 0.945884 |
| <i>Parvibaculum</i>      | 0.001985           | 0                      | 0.000588              | 0.002738             | 0                        | 0.001266                | 0.669663        | 0.945884 |
| <i>Sporichthya</i>       | 0.005839           | 0                      | 0.001385              | 0.007647             | 1.00E-06                 | 0.003193                | 0.680803        | 0.945884 |
| <i>Cellvibrio</i>        | 0.019969           | 2.00E-06               | 0.006032              | 0.01619              | 1.00E-06                 | 0.004096                | 0.681545        | 0.945884 |
| <i>Flavobacterium</i>    | 0.877362           | 0.004492               | 0.273603              | 1.273172             | 0.030878                 | 0.717384                | 0.682955        | 0.945884 |
| <i>Pedobacter</i>        | 0.171838           | 0.000488               | 0.090172              | 0.118845             | 0.000151                 | 0.050128                | 0.683787        | 0.945884 |
| <i>Nitrospira</i>        | 0.445815           | 0.000467               | 0.088269              | 0.503638             | 0.000302                 | 0.070958                | 0.685663        | 0.945884 |
| <i>Bacillus</i>          | 0.107684           | 2.70E-05               | 0.0213                | 0.122934             | 2.80E-05                 | 0.02143                 | 0.692652        | 0.945884 |
| <i>Dokdonella</i>        | 0.309687           | 0.001932               | 0.179425              | 0.204075             | 0.000724                 | 0.109839                | 0.694202        | 0.945884 |
| <i>Cystobacter</i>       | 0.002341           | 0                      | 0.000814              | 0.001711             | 0                        | 0.000963                | 0.695376        | 0.945884 |
| <i>Rhodococcus</i>       | 0.004456           | 0                      | 0.001643              | 0.003412             | 0                        | 0.001343                | 0.700882        | 0.947308 |
| <i>Erwinia</i>           | 0.001658           | 0                      | 0.001463              | 0.000674             | 0                        | 0.000674                | 0.706332        | 0.947308 |
| <i>Kaistia</i>           | 0.003577           | 0                      | 0.001393              | 0.004667             | 0                        | 0.001828                | 0.709725        | 0.947308 |
| <i>DA101</i>             | 1.337443           | 0.004595               | 0.276748              | 1.186485             | 0.001666                 | 0.166646                | 0.713725        | 0.947308 |
| <i>Nonomuraea</i>        | 0.000684           | 0                      | 0.000684              | 0.001388             | 0                        | 0.001005                | 0.73367         | 0.957283 |
| <i>Geobacter</i>         | 0.028749           | 7.00E-06               | 0.010836              | 0.04678              | 9.80E-05                 | 0.040419                | 0.734348        | 0.957283 |
| <i>Steroidobacter</i>    | 0.130123           | 5.00E-05               | 0.0288                | 0.112753             | 4.80E-05                 | 0.028216                | 0.734354        | 0.957283 |
| <i>Dactylosporangium</i> | 0.046263           | 3.00E-06               | 0.007461              | 0.042145             | 3.00E-06                 | 0.006769                | 0.747208        | 0.96664  |
| <i>Clostridium</i>       | 0.001841           | 0                      | 0.000684              | 0.001352             | 0                        | 0.001004                | 0.75118         | 0.96664  |
| <i>Shimazuella</i>       | 0.001862           | 0                      | 0.000892              | 0.001728             | 0                        | 0.000818                | 0.754774        | 0.96664  |
| <i>Methylotenera</i>     | 0.009481           | 2.00E-06               | 0.005889              | 0.0128               | 2.00E-06                 | 0.006356                | 0.761893        | 0.970085 |
| <i>Sinomonas</i>         | 0.010163           | 1.00E-06               | 0.00314               | 0.012312             | 1.00E-06                 | 0.004955                | 0.772567        | 0.974766 |
| <i>Catellatospora</i>    | 0.042085           | 9.00E-06               | 0.012458              | 0.047819             | 6.00E-06                 | 0.009681                | 0.774472        | 0.974766 |
| <i>Alicyclobacillus</i>  | 0.01397            | 0                      | 0.001866              | 0.0151               | 0                        | 0.002822                | 0.79132         | 0.984019 |

| Genus                   | mean of Z31DRh (%) | variance of Z31DRh (%) | std.err of Z31DRh (%) | mean of Z31J1DRh (%) | variance of Z31J1DRh (%) | std.err of Z31J1DRh (%) | <i>p</i> -vlaue | FDR      |
|-------------------------|--------------------|------------------------|-----------------------|----------------------|--------------------------|-------------------------|-----------------|----------|
| <i>Methylobacterium</i> | 0.017552           | 1.00E-06               | 0.003815              | 0.019404             | 1.00E-06                 | 0.004326                | 0.800219        | 0.984019 |
| <i>Skermanella</i>      | 0.012896           | 0                      | 0.002486              | 0.011973             | 0                        | 0.001848                | 0.812916        | 0.984019 |
| <i>Pilimelia</i>        | 0.038136           | 1.00E-06               | 0.004274              | 0.035706             | 3.00E-06                 | 0.007016                | 0.814174        | 0.984019 |
| <i>Pseudonocardia</i>   | 0.023413           | 1.00E-06               | 0.003065              | 0.021871             | 1.00E-06                 | 0.004404                | 0.819337        | 0.984019 |
| <i>Flaviumibacter</i>   | 0.062034           | 1.90E-05               | 0.017619              | 0.072936             | 7.50E-05                 | 0.03527                 | 0.826798        | 0.984019 |
| <i>Methylibium</i>      | 1.157847           | 0.000351               | 0.076527              | 1.110888             | 0.001418                 | 0.153754                | 0.828421        | 0.984019 |
| <i>Ellin506</i>         | 0.030047           | 1.00E-06               | 0.00494               | 0.027028             | 6.00E-06                 | 0.010038                | 0.830225        | 0.984019 |
| <i>Sphingopyxis</i>     | 0.02672            | 8.00E-06               | 0.011413              | 0.033248             | 2.80E-05                 | 0.021759                | 0.832893        | 0.984019 |
| <i>Fimbriimonas</i>     | 0.213259           | 6.00E-05               | 0.031492              | 0.202583             | 4.20E-05                 | 0.026305                | 0.836528        | 0.984019 |
| <i>Planifilum</i>       | 0.001791           | 0                      | 0.00105               | 0.001457             | 0                        | 0.000746                | 0.836803        | 0.984019 |
| <i>Zoogloea</i>         | 0.036866           | 1.20E-05               | 0.013934              | 0.031157             | 1.80E-05                 | 0.017129                | 0.83764         | 0.984019 |
| <i>Nevskia</i>          | 0.016681           | 0                      | 0.00269               | 0.015755             | 0                        | 0.002729                | 0.847831        | 0.984019 |
| <i>Arthrobacter</i>     | 0.077811           | 1.40E-05               | 0.015146              | 0.081771             | 3.00E-06                 | 0.007191                | 0.851719        | 0.984019 |
| <i>Telmatospirillum</i> | 0.001795           | 0                      | 0.000987              | 0.00209              | 0                        | 0.00077                 | 0.852011        | 0.984019 |
| <i>Emticicia</i>        | 0.037206           | 1.50E-05               | 0.016059              | 0.030975             | 3.00E-05                 | 0.022525                | 0.857904        | 0.984019 |
| <i>Anaeromyxobacter</i> | 0.036357           | 9.00E-06               | 0.012167              | 0.043983             | 6.00E-05                 | 0.031696                | 0.858208        | 0.984019 |
| <i>Rubrivivax</i>       | 0.409686           | 9.40E-05               | 0.039644              | 0.387794             | 0.000544                 | 0.095216                | 0.866539        | 0.988385 |
| <i>Cupriavidus</i>      | 1.152182           | 0.005052               | 0.290164              | 1.0729               | 0.003979                 | 0.257535                | 0.87168         | 0.988385 |
| <i>A17</i>              | 0.012369           | 1.00E-06               | 0.002946              | 0.013414             | 1.00E-06                 | 0.004352                | 0.875556        | 0.988385 |
| <i>Brevibacillus</i>    | 0.003069           | 0                      | 0.001149              | 0.003396             | 0                        | 0.001539                | 0.892663        | 0.99936  |
| <i>Cohnella</i>         | 0.03695            | 3.00E-06               | 0.007061              | 0.040822             | 2.90E-05                 | 0.022039                | 0.894404        | 0.99936  |
| <i>Cytophaga</i>        | 0.02787            | 7.00E-06               | 0.011158              | 0.030919             | 1.80E-05                 | 0.017129                | 0.905034        | 1        |
| <i>Streptomyces</i>     | 0.854708           | 0.00074                | 0.111048              | 0.935916             | 0.017861                 | 0.545601                | 0.906921        | 1        |
| <i>Ralstonia</i>        | 1.67874            | 0.010599               | 0.42029               | 1.785367             | 0.027585                 | 0.678044                | 0.914483        | 1        |
| <i>Aeromicrobium</i>    | 0.235477           | 0.000916               | 0.123541              | 0.215688             | 0.00074                  | 0.111059                | 0.923051        | 1        |

| Genus                             | mean of Z31DRh (%) | variance of Z31DRh (%) | std.err of Z31DRh (%) | mean of Z31J1DRh (%) | variance of Z31J1DRh (%) | std.err of Z31J1DRh (%) | <i>p</i> -vlaue | FDR |
|-----------------------------------|--------------------|------------------------|-----------------------|----------------------|--------------------------|-------------------------|-----------------|-----|
| <i>Elizabethkingia</i>            | 0.025119           | 4.00E-06               | 0.00764               | 0.027306             | 1.80E-05                 | 0.017369                | 0.925478        | 1   |
| <i>Vermamoeba</i>                 | 0.002566           | 0                      | 0.000634              | 0.002413             | 0                        | 0.001212                | 0.927354        | 1   |
| <i>Spirochaeta</i>                | 0.017629           | 1.00E-06               | 0.004565              | 0.018098             | 1.00E-06                 | 0.003807                | 0.947685        | 1   |
| <i>Pseudomonas</i>                | 0.56006            | 0.000236               | 0.062759              | 0.542984             | 0.002749                 | 0.214058                | 0.949056        | 1   |
| <i>Mesorhizobium</i>              | 0.141725           | 1.10E-05               | 0.013719              | 0.139498             | 4.60E-05                 | 0.027765                | 0.952174        | 1   |
| <i>Nocardioides</i>               | 0.076133           | 5.00E-06               | 0.009436              | 0.076746             | 6.00E-06                 | 0.009847                | 0.967309        | 1   |
| <i>Rubrobacter</i>                | 0.005261           | 0                      | 0.001756              | 0.005304             | 0                        | 0.002474                | 0.984472        | 1   |
| <i>Balneimonas</i>                | 0.008188           | 0                      | 0.002316              | 0.008182             | 0                        | 0.002425                | 0.993253        | 1   |
| <i>Agromyces</i>                  | 0.020619           | 4.00E-06               | 0.007978              | 0.020638             | 4.00E-06                 | 0.008085                | 0.993494        | 1   |
| <i>Oophila</i>                    | 0.001261           | 0                      | 0.000707              | 0.001008             | 0                        | 0.000688                | 1               | 1   |
| <i>Streptosporangium</i>          | 0.001134           | 0                      | 0.000781              | 0.00104              | 0                        | 0.000466                | 1               | 1   |
| <i>Plesiocystis</i>               | 0.001103           | 0                      | 0.001103              | 0.00101              | 0                        | 0.00101                 | 1               | 1   |
| <i>Singulisphaera</i>             | 0.001074           | 0                      | 0.000552              | 0.001421             | 0                        | 0.000692                | 1               | 1   |
| <i>Candidatus_Amoebophilus</i>    | 0.001043           | 0                      | 0.000706              | 0.001359             | 0                        | 0.000676                | 1               | 1   |
| <i>Candidatus_Proteochlamydic</i> | 0.000744           | 0                      | 0.000744              | 0.000688             | 0                        | 0.000435                | 1               | 1   |
| <i>Gracilibacter</i>              | 0.000725           | 0                      | 0.00046               | 0.001009             | 0                        | 0.000688                | 1               | 1   |
| <i>Dunaliella</i>                 | 0.000346           | 0                      | 0.000346              | 0.000339             | 0                        | 0.000339                | 1               | 1   |
| <i>Ruminococcus</i>               | 0.000346           | 0                      | 0.000346              | 0.000339             | 0                        | 0.000339                | 1               | 1   |
| <i>Oxobacter</i>                  | 0.000342           | 0                      | 0.000342              | 0.000699             | 0                        | 0.000699                | 1               | 1   |

Note 1. The relative abundances of taxa in the surrounding soils, whose *p*-value were labeled by orange color, were significantly different ( $p < 0.05$ ) between the glyphosate treated line Z31 and its control Z31 without glyphosate treatment.

| Genus                               | mean of Z31DSO (%) | variance of Z31DSO (%) | std.err of Z31DSO (%) | mean of Z31J1DSO (%) | variance of Z31J1DSO (%) | std.err of Z31J1DSO (%) | p -vlaue | FDR      |
|-------------------------------------|--------------------|------------------------|-----------------------|----------------------|--------------------------|-------------------------|----------|----------|
| <i>Planctomyces</i>                 | 0.144524           | 1.40E-05               | 0.015435              | 0.085474             | 4.00E-06                 | 0.008611                | 0.004895 | 0.524352 |
| <i>Thermomonas</i>                  | 0.040615           | 2.00E-06               | 0.005484              | 0.02363              | 0                        | 0.00172                 | 0.010035 | 0.524352 |
| <i>Luteolibacter</i>                | 0.023406           | 2.00E-06               | 0.005079              | 0.004806             | 1.00E-06                 | 0.003817                | 0.010450 | 0.524352 |
| <i>Dokdonella</i>                   | 0.090495           | 1.40E-05               | 0.015086              | 0.043861             | 2.00E-06                 | 0.005544                | 0.010924 | 0.524352 |
| <i>Azospirillum</i>                 | 0.004117           | 0                      | 0.000712              | 0.001491             | 0                        | 0.00074                 | 0.021632 | 0.702747 |
| <i>Candidatus_Koribacter</i>        | 3.421781           | 0.01233                | 0.45333               | 5.096233             | 0.01414                  | 0.48546                 | 0.023082 | 0.702747 |
| <i>OR-59</i>                        | 0.054524           | 1.30E-05               | 0.01447               | 0.016748             | 2.00E-06                 | 0.006171                | 0.028825 | 0.702747 |
| <i>Ralstonia</i>                    | 0.230510           | 3.60E-05               | 0.024544              | 0.359219             | 0.000146                 | 0.04928                 | 0.032415 | 0.702747 |
| <i>Cellulosimicrobium</i>           | 0.000556           | 0                      | 0.000556              | 0.005222             | 0                        | 0.002055                | 0.041556 | 0.702747 |
| <i>Unclassified</i>                 | 73.72133           | 0.0355                 | 0.769195              | 68.903703            | 0.281275                 | 2.165161                | 0.050193 | 0.702747 |
| <i>Anaeromyxobacter</i>             | 0.108878           | 4.30E-05               | 0.0267                | 0.047781             | 1.00E-05                 | 0.012977                | 0.053649 | 0.702747 |
| <i>Spirosoma</i>                    | 0.008587           | 0                      | 0.002612              | 0.002669             | 0                        | 0.001304                | 0.056602 | 0.702747 |
| <i>Steroidobacter</i>               | 0.273937           | 0.000153               | 0.050479              | 0.162436             | 3.30E-05                 | 0.023628                | 0.059713 | 0.702747 |
| <i>Luteimonas</i>                   | 0.136889           | 5.00E-05               | 0.028914              | 0.072922             | 1.30E-05                 | 0.014849                | 0.063719 | 0.702747 |
| <i>Candidatus_Xiphinematobacter</i> | 0.034862           | 1.00E-06               | 0.003307              | 0.020342             | 3.00E-06                 | 0.006856                | 0.072292 | 0.702747 |
| <i>Candidatus_Rhabdochlamydia</i>   | 0.040559           | 6.00E-06               | 0.010174              | 0.07007              | 8.00E-06                 | 0.011703                | 0.072655 | 0.702747 |
| <i>Turneriella</i>                  | 0.006389           | 0                      | 0.002477              | 0.001629             | 0                        | 0.000525                | 0.076076 | 0.702747 |
| <i>Shimazuella</i>                  | 0.000798           | 0                      | 0.000512              | 0.004105             | 0                        | 0.001697                | 0.078111 | 0.702747 |
| <i>A17</i>                          | 0.034135           | 1.00E-06               | 0.003821              | 0.02446              | 1.00E-06                 | 0.003581                | 0.081094 | 0.702747 |
| <i>Agromyces</i>                    | 0.011601           | 1.00E-06               | 0.004842              | 0.002667             | 0                        | 0.000871                | 0.086316 | 0.702747 |
| <i>Uliginosibacterium</i>           | 0.019097           | 0                      | 0.001679              | 0.047564             | 1.50E-05                 | 0.015786                | 0.090094 | 0.702747 |
| <i>Terribacillus</i>                | 0.001189           | 0                      | 0.000574              | 0.003286             | 0                        | 0.001027                | 0.092076 | 0.702747 |
| <i>Sporosarcina</i>                 | 0.454482           | 0.000416               | 0.083258              | 0.646244             | 0.000303                 | 0.071024                | 0.096684 | 0.702747 |
| <i>JG37-AG-70</i>                   | 0.011356           | 1.00E-06               | 0.003717              | 0.004511             | 0                        | 0.001207                | 0.09693  | 0.702747 |
| <i>Pilimelia</i>                    | 0.074507           | 2.00E-06               | 0.006319              | 0.052617             | 7.00E-06                 | 0.011072                | 0.103228 | 0.702747 |
| <i>Kuenenia</i>                     | 0.000872           | 0                      | 0.000872              | 0                    | 0                        | 0                       | 0.10992  | 0.702747 |
| <i>Magnetospirillum</i>             | 0.000872           | 0                      | 0.000872              | 0                    | 0                        | 0                       | 0.10992  | 0.702747 |
| <i>Pleomorphomonas</i>              | 0.001366           | 0                      | 0.001366              | 0                    | 0                        | 0                       | 0.10992  | 0.702747 |
| <i>Rickettsia</i>                   | 0.00217            | 0                      | 0.001569              | 0.008145             | 1.00E-06                 | 0.003206                | 0.112216 | 0.702747 |

| Genus                   | mean of Z31DSO (%) | variance of Z31DSO (%) | std.err of Z31DSO (%) | mean of Z31J1DSO (%) | variance of Z31J1DSO (%) | std.err of Z31J1DSO (%) | <i>p</i> -vlaue | FDR      |
|-------------------------|--------------------|------------------------|-----------------------|----------------------|--------------------------|-------------------------|-----------------|----------|
| <i>Burkholderia</i>     | 0.370188           | 0.000192               | 0.056543              | 0.503716             | 0.000198                 | 0.057432                | 0.116462        | 0.702747 |
| <i>Chryseobacterium</i> | 0.146475           | 8.90E-05               | 0.038446              | 1.350151             | 0.032448                 | 0.735394                | 0.121175        | 0.702747 |
| <i>Zoogloea</i>         | 0.010831           | 1.00E-06               | 0.002918              | 0.003908             | 1.00E-06                 | 0.003074                | 0.121287        | 0.702747 |
| <i>Kineococcus</i>      | 0                  | 0                      | 0                     | 0.001446             | 0                        | 0.001446                | 0.126318        | 0.702747 |
| <i>Sphingobacterium</i> | 0.140192           | 0.000278               | 0.068069              | 0.83543              | 0.010947                 | 0.427137                | 0.127567        | 0.702747 |
| <i>Prostheco bacter</i> | 0.034587           | 3.00E-06               | 0.007484              | 0.020373             | 1.00E-06                 | 0.004739                | 0.128105        | 0.702747 |
| <i>Geobacter</i>        | 0.061397           | 2.30E-05               | 0.019624              | 0.025324             | 8.00E-06                 | 0.011533                | 0.134199        | 0.711163 |
| <i>Segetibacter</i>     | 0.065594           | 3.00E-06               | 0.006941              | 0.088632             | 1.00E-05                 | 0.012863                | 0.137047        | 0.711163 |
| <i>Rubrivivax</i>       | 0.116772           | 4.30E-05               | 0.026762              | 0.072266             | 7.00E-06                 | 0.010476                | 0.144596        | 0.716527 |
| <i>Rickettsiella</i>    | 0.004827           | 1.00E-06               | 0.003516              | 0.028619             | 1.40E-05                 | 0.015245                | 0.151386        | 0.716527 |
| <i>Adhaeribacter</i>    | 0.012532           | 2.00E-06               | 0.005518              | 0.003562             | 0                        | 0.00215                 | 0.152848        | 0.716527 |
| <i>Cryocola</i>         | 0.022076           | 1.00E-06               | 0.003594              | 0.032424             | 2.00E-06                 | 0.005821                | 0.153339        | 0.716527 |
| <i>Gracilibacter</i>    | 4/29/2016 0.004727 | 0                      | 0.001339              | 0.002167             | 0                        | 0.001093                | 0.162386        | 0.716527 |
| <i>Sphingopyxis</i>     | 0.000816           | 0                      | 0.000547              | 0.002566             | 0                        | 0.001052                | 0.164012        | 0.716527 |
| <i>DA101</i>            | 0.003099           | 0                      | 0.001085              | 0.0275               | 1.60E-05                 | 0.016498                | 0.164427        | 0.716527 |
| <i>Bdellovibrio</i>     | 1.938413           | 0.001208               | 0.141904              | 1.523979             | 0.003591                 | 0.244629                | 0.167936        | 0.716527 |
| <i>Brevibacillus</i>    | 0.062337           | 2.00E-06               | 0.005359              | 0.075728             | 4.00E-06                 | 0.007815                | 0.184883        | 0.741281 |
| <i>Catellatospora</i>   | 0.009736           | 0                      | 0.002019              | 0.014171             | 0                        | 0.002427                | 0.187345        | 0.741281 |
| <i>Caulobacter</i>      | 0.090765           | 1.00E-05               | 0.012696              | 0.068283             | 6.00E-06                 | 0.00983                 | 0.188719        | 0.741281 |
| <i>Pedobacter</i>       | 0.012809           | 1.00E-06               | 0.003512              | 0.033563             | 1.20E-05                 | 0.014418                | 0.189181        | 0.741281 |
| <i>Agrobacterium</i>    | 0.270533           | 0.000219               | 0.060419              | 1.048449             | 0.018955                 | 0.56206                 | 0.196287        | 0.753742 |
| <i>Alkanibacter</i>     | 0.080939           | 1.00E-05               | 0.012899              | 0.240053             | 0.000881                 | 0.121152                | 0.220918        | 0.780912 |
| <i>Sphingobium</i>      | 0.000975           | 0                      | 0.000688              | 0.004837             | 1.00E-06                 | 0.002923                | 0.228491        | 0.780912 |
| <i>Dechloromonas</i>    | 0.012414           | 2.00E-06               | 0.006003              | 0.004182             | 0                        | 0.002224                | 0.228749        | 0.780912 |
| <i>Gemmatimonas</i>     | 0.073333           | 1.10E-05               | 0.01325               | 0.047062             | 1.60E-05                 | 0.016403                | 0.242526        | 0.780912 |
| <i>Epulopiscium</i>     | 0.006344           | 2.00E-06               | 0.005128              | 0                    | 0                        | 0                       | 0.245836        | 0.780912 |
| <i>Dyadobacter</i>      | 0                  | 0                      | 0                     | 0.001085             | 0                        | 0.001085                | 0.251318        | 0.780912 |
| <i>Sporichthya</i>      | 0.010152           | 2.00E-06               | 0.005146              | 0.15252              | 0.00081                  | 0.116221                | 0.253801        | 0.780912 |
|                         | 0.006744           | 0                      | 0.002437              | 0.010562             | 0                        | 0.001979                | 0.25645         | 0.780912 |



| Genus                    | mean of Z31DSO (%) | variance of Z31DSO (%) | std.err of Z31DSO (%) | mean of Z31J1DSO (%) | variance of Z31J1DSO (%) | std.err of Z31J1DSO (%) | p -vlaue | FDR      |
|--------------------------|--------------------|------------------------|-----------------------|----------------------|--------------------------|-------------------------|----------|----------|
| <i>Streptosporangium</i> | 0.017344           | 4.00E-06               | 0.008432              | 0.00657              | 0                        | 0.002787                | 0.257725 | 0.780912 |
| <i>Sinomonas</i>         | 0.002515           | 0                      | 0.00126               | 0.004603             | 0                        | 0.001176                | 0.25886  | 0.780912 |
| <i>Anaerolinea</i>       | 0.049636           | 9.00E-06               | 0.012207              | 0.030244             | 7.00E-06                 | 0.010445                | 0.261444 | 0.780912 |
| <i>Escherichia</i>       | 0.083375           | 0.00033                | 0.074167              | 0.229443             | 0.000554                 | 0.096098                | 0.262982 | 0.780912 |
| <i>Hyphomicrobium</i>    | 0.058466           | 2.00E-06               | 0.006265              | 0.045451             | 5.00E-06                 | 0.008923                | 0.266854 | 0.780912 |
| <i>Planifilum</i>        | 0.001853           | 0                      | 0.000898              | 0.003338             | 0                        | 0.000873                | 0.270602 | 0.780912 |
| <i>Ferruginibacter</i>   | 0.009051           | 1.00E-06               | 0.003387              | 0.014156             | 0                        | 0.002751                | 0.277251 | 0.780912 |
| <i>Brevundimonas</i>     | 0.001163           | 0                      | 0.001163              | 0.008732             | 2.00E-06                 | 0.00641                 | 0.28038  | 0.780912 |
| <i>Chromobacterium</i>   | 0.10944            | 8.60E-05               | 0.03782               | 0.061998             | 1.50E-05                 | 0.015701                | 0.284053 | 0.780912 |
| <i>Methylobacterium</i>  | 0.015684           | 2.00E-06               | 0.00515               | 0.024839             | 2.00E-06                 | 0.006064                | 0.287485 | 0.780912 |
| <i>Flavisolibacter</i>   | 1.684902           | 0.001962               | 0.180816              | 2.056275             | 0.004313                 | 0.268114                | 0.288725 | 0.780912 |
| <i>Coproccoccus</i>      | 0.001027           | 0                      | 0.001027              | 0.002617             | 0                        | 0.000934                | 0.289918 | 0.780912 |
| <i>Cupriavidus</i>       | 0.248941           | 0.000223               | 0.060952              | 0.16165              | 0.000126                 | 0.045839                | 0.290789 | 0.780912 |
| <i>Gemmata</i>           | 0.160887           | 1.10E-05               | 0.013265              | 0.133444             | 2.40E-05                 | 0.020091                | 0.292842 | 0.780912 |
| <i>Niastella</i>         | 0.245382           | 0.00019                | 0.056231              | 0.177707             | 3.80E-05                 | 0.025311                | 0.314526 | 0.787755 |
| <i>Ophila</i>            | 0.006309           | 1.00E-06               | 0.003797              | 0.002121             | 0                        | 0.000444                | 0.315374 | 0.787755 |
| <i>Siphonobacter</i>     | 0.003434           | 0                      | 0.002278              | 0.006356             | 0                        | 0.00139                 | 0.315456 | 0.787755 |
| <i>Actinoplanes</i>      | 0.00935            | 1.00E-06               | 0.004652              | 0.003874             | 0                        | 0.001968                | 0.320994 | 0.787755 |
| <i>Dactylosporangium</i> | 0.087437           | 9.00E-06               | 0.012079              | 0.07079              | 6.00E-06                 | 0.00964                 | 0.325041 | 0.787755 |
| <i>Afifella</i>          | 0.001302           | 0                      | 0.000618              | 0.002387             | 0                        | 0.000803                | 0.328579 | 0.787755 |
| <i>Pseudoxanthomonas</i> | 0.004412           | 0                      | 0.002004              | 0.002024             | 0                        | 0.001013                | 0.332053 | 0.787755 |
| <i>Mesorhizobium</i>     | 0.087997           | 1.90E-05               | 0.017897              | 0.061998             | 1.70E-05                 | 0.016811                | 0.334076 | 0.787755 |
| <i>Methylibium</i>       | 1.129602           | 0.001391               | 0.152249              | 0.938322             | 0.000577                 | 0.098064                | 0.335503 | 0.787755 |
| <i>Dyella</i>            | 0.039208           | 1.40E-05               | 0.015163              | 0.021757             | 3.00E-06                 | 0.007066                | 0.341327 | 0.787755 |
| <i>Achromobacter</i>     | 0.025822           | 6.00E-06               | 0.009712              | 0.015107             | 1.00E-06                 | 0.003533                | 0.344643 | 0.787755 |
| <i>Streptomyces</i>      | 0.366997           | 0.000393               | 0.080953              | 0.252387             | 0.00034                  | 0.075279                | 0.344643 | 0.787755 |
| <i>Clostridium</i>       | 0.082905           | 9.00E-06               | 0.012439              | 0.112996             | 4.30E-05                 | 0.026835                | 0.354228 | 0.800139 |
| <i>Devosia</i>           | 0                  | 0                      | 0                     | 0.002201             | 0                        | 0.002201                | 0.362965 | 0.804319 |
| <i>Flavobacterium</i>    | 0.418371           | 0.000531               | 0.094035              | 0.639753             | 0.002501                 | 0.204181                | 0.376637 | 0.804319 |

| Genus                    | mean of Z31DSO (%) | variance of Z31DSO (%) | std.err of Z31DSO (%) | mean of Z31J1DSO (%) | variance of Z31J1DSO (%) | std.err of Z31J1DSO (%) | <i>p</i> -vlaue | FDR      |
|--------------------------|--------------------|------------------------|-----------------------|----------------------|--------------------------|-------------------------|-----------------|----------|
| <i>Chthonomonas</i>      | 0.000291           | 0                      | 0.000291              | 0.001446             | 0                        | 0.001446                | 0.377195        | 0.804319 |
| <i>Paracoccus</i>        | 0.000594           | 0                      | 0.000594              | 0.001853             | 0                        | 0.000915                | 0.377195        | 0.804319 |
| <i>Stenotrophomonas</i>  | 0.024522           | 3.00E-06               | 0.007454              | 0.038002             | 8.00E-06                 | 0.011763                | 0.384626        | 0.804319 |
| <i>Syntrichia</i>        | 0.001827           | 0                      | 0.00062               | 0.003564             | 0                        | 0.001689                | 0.386053        | 0.804319 |
| <i>Cohnella</i>          | 0.008916           | 1.00E-06               | 0.003973              | 0.016825             | 3.00E-06                 | 0.007213                | 0.388246        | 0.804319 |
| <i>Roseomonas</i>        | 0.004295           | 0                      | 0.001199              | 0.006592             | 0                        | 0.002129                | 0.400152        | 0.804319 |
| <i>Elizabethkingia</i>   | 0.013599           | 3.00E-06               | 0.007142              | 0.052703             | 0.000102                 | 0.041188                | 0.402632        | 0.804319 |
| <i>Kaistobacter</i>      | 1.946907           | 0.006578               | 0.331107              | 2.283934             | 0.001249                 | 0.144255                | 0.403556        | 0.804319 |
| <i>Paenibacillus</i>     | 0.174227           | 0.000131               | 0.04665               | 0.284235             | 0.00072                  | 0.109521                | 0.408942        | 0.804319 |
| <i>Bacillus</i>          | 0.094189           | 3.10E-05               | 0.022603              | 0.137099             | 0.000102                 | 0.041148                | 0.414421        | 0.804319 |
| <i>Larkinella</i>        | 0.000342           | 0                      | 0.000342              | 0.003977             | 1.00E-06                 | 0.003977                | 0.41652         | 0.804319 |
| <i>Asticcacaulis</i>     | 0.006485           | 0                      | 0.001941              | 0.027738             | 3.30E-05                 | 0.023392                | 0.422281        | 0.804319 |
| <i>Syntrophobacter</i>   | 0.003967           | 1.00E-06               | 0.00323               | 0.001035             | 0                        | 0.000465                | 0.426637        | 0.804319 |
| <i>Lupinus</i>           | 0.030332           | 1.80E-05               | 0.017104              | 0.014151             | 2.00E-06                 | 0.006177                | 0.430942        | 0.804319 |
| <i>Alicyclobacillus</i>  | 0.044715           | 4.00E-06               | 0.008517              | 0.056138             | 6.00E-06                 | 0.009658                | 0.432532        | 0.804319 |
| <i>Caldilinea</i>        | 0.001593           | 0                      | 0.00072               | 0.000723             | 0                        | 0.000723                | 0.435589        | 0.804319 |
| <i>Ureibacillus</i>      | 0.000798           | 0                      | 0.000512              | 0.00245              | 0                        | 0.001804                | 0.435673        | 0.804319 |
| <i>Asteroleplasma</i>    | 0.095441           | 2.80E-05               | 0.021559              | 0.068856             | 2.80E-05                 | 0.021521                | 0.441006        | 0.806411 |
| <i>Chthoniobacter</i>    | 0.341071           | 0.000273               | 0.067436              | 0.269928             | 0.000165                 | 0.052477                | 0.463345        | 0.839266 |
| <i>Labrys</i>            | 0.01099            | 1.00E-06               | 0.003278              | 0.02712              | 2.60E-05                 | 0.020625                | 0.498427        | 0.882282 |
| <i>Conexibacter</i>      | 0                  | 0                      | 0                     | 0.000985             | 0                        | 0.000985                | 0.500879        | 0.882282 |
| <i>SC3-56</i>            | 0                  | 0                      | 0                     | 0.000723             | 0                        | 0.000723                | 0.500879        | 0.882282 |
| <i>Sediminibacterium</i> | 0.091665           | 1.10E-05               | 0.013821              | 0.106085             | 1.10E-05                 | 0.013436                | 0.51507         | 0.899031 |
| <i>Acanthamoeba</i>      | 0.010259           | 1.00E-06               | 0.00358               | 0.006909             | 1.00E-06                 | 0.00324                 | 0.545632        | 0.913906 |
| <i>Leptolyngbya</i>      | 0.010332           | 0                      | 0.002836              | 0.007442             | 1.00E-06                 | 0.003122                | 0.550977        | 0.913906 |
| <i>Flaviumibacter</i>    | 0.033478           | 1.40E-05               | 0.015172              | 0.021757             | 4.00E-06                 | 0.008                   | 0.551784        | 0.913906 |
| <i>Nevskia</i>           | 0.018762           | 3.00E-06               | 0.006991              | 0.028477             | 9.00E-06                 | 0.012574                | 0.556784        | 0.913906 |
| <i>Nocardia</i>          | 0.003132           | 0                      | 0.001242              | 0.004498             | 0                        | 0.001639                | 0.563398        | 0.913906 |
| <i>Rubrobacter</i>       | 0.017522           | 3.00E-06               | 0.007525              | 0.012088             | 1.00E-06                 | 0.00338                 | 0.566854        | 0.913906 |

| Genus                          | mean of Z31DSO (%) | variance of Z31DSO (%) | std.err of Z31DSO (%) | mean of Z31J1DSO (%) | variance of Z31J1DSO (%) | std.err of Z31J1DSO (%) | p -vlaue | FDR      |
|--------------------------------|--------------------|------------------------|-----------------------|----------------------|--------------------------|-------------------------|----------|----------|
| <i>Emticicia</i>               | 0.00519            | 0                      | 0.002414              | 0.003062             | 0                        | 0.002165                | 0.568094 | 0.913906 |
| <i>Rhodanobacter</i>           | 0.047989           | 7.00E-06               | 0.010463              | 0.037002             | 1.10E-05                 | 0.013447                | 0.575643 | 0.913906 |
| <i>Sphingomonas</i>            | 0.187299           | 5.10E-05               | 0.029296              | 0.16113              | 4.90E-05                 | 0.028642                | 0.578696 | 0.913906 |
| <i>Terriglobus</i>             | 0.013212           | 0                      | 0.00266               | 0.015863             | 1.00E-06                 | 0.003255                | 0.582906 | 0.913906 |
| <i>Opitutus</i>                | 0.475873           | 6.00E-05               | 0.031692              | 0.517703             | 0.000216                 | 0.059956                | 0.591351 | 0.913906 |
| <i>Hymenobacter</i>            | 0.006993           | 1.00E-06               | 0.003817              | 0.010843             | 2.00E-06                 | 0.005032                | 0.595819 | 0.913906 |
| <i>Filimonas</i>               | 0.003464           | 0                      | 0.002205              | 0.001993             | 0                        | 0.000992                | 0.596795 | 0.913906 |
| <i>Fimbrimonas</i>             | 0.261773           | 3.00E-05               | 0.022424              | 0.280094             | 2.50E-05                 | 0.020564                | 0.600123 | 0.913906 |
| <i>Pythium</i>                 | 0.059636           | 5.00E-06               | 0.009433              | 0.072951             | 2.40E-05                 | 0.020048                | 0.600596 | 0.913906 |
| <i>Cytophaga</i>               | 0.014596           | 2.00E-06               | 0.006155              | 0.021516             | 6.00E-06                 | 0.010264                | 0.614544 | 0.913906 |
| <i>Balneimonas</i>             | 0.01579            | 0                      | 0.00287               | 0.012995             | 1.00E-06                 | 0.003904                | 0.615345 | 0.913906 |
| <i>Aeromicrobium</i>           | 0.233133           | 0.000205               | 0.058506              | 0.17096              | 0.000517                 | 0.092801                | 0.62045  | 0.913906 |
| <i>Caloramator</i>             | 0.000342           | 0                      | 0.000342              | 0.00108              | 0                        | 0.000737                | 0.626317 | 0.913906 |
| <i>Candidatus_Amoebophilus</i> | 0.000525           | 0                      | 0.000525              | 0.000991             | 0                        | 0.00066                 | 0.626317 | 0.913906 |
| <i>Leeia</i>                   | 0.000556           | 0                      | 0.000556              | 0.001085             | 0                        | 0.001085                | 0.626317 | 0.913906 |
| <i>heteroC45_4W</i>            | 0.002113           | 0                      | 0.000976              | 0.001344             | 0                        | 0.000978                | 0.628427 | 0.913906 |
| <i>Patulibacter</i>            | 0.006915           | 1.00E-06               | 0.003387              | 0.011973             | 4.00E-06                 | 0.008578                | 0.63307  | 0.913906 |
| <i>Phormidium</i>              | 0.053802           | 7.30E-05               | 0.034951              | 0.032174             | 3.60E-05                 | 0.024451                | 0.657819 | 0.942547 |
| <i>Mycobacterium</i>           | 0.089522           | 5.00E-06               | 0.008746              | 0.079969             | 2.00E-05                 | 0.018036                | 0.675029 | 0.953696 |
| <i>Pelotomaculum</i>           | 0.001713           | 0                      | 0.001199              | 0.000854             | 0                        | 0.000549                | 0.675535 | 0.953696 |
| <i>Aquicella</i>               | 0.39314            | 0.000313               | 0.072225              | 0.435687             | 0.000208                 | 0.058927                | 0.687246 | 0.963148 |
| <i>Niabella</i>                | 0.024625           | 5.00E-06               | 0.009133              | 0.030634             | 7.00E-06                 | 0.01064                 | 0.70586  | 0.976011 |
| <i>Spirochaeta</i>             | 0.017414           | 2.00E-06               | 0.005675              | 0.013652             | 3.00E-06                 | 0.006734                | 0.706591 | 0.976011 |
| <i>Thermoactinomyces</i>       | 0.002403           | 0                      | 0.001798              | 0.001621             | 0                        | 0.000536                | 0.712854 | 0.977129 |
| <i>Actinomycetospora</i>       | 0.003158           | 0                      | 0.001243              | 0.003825             | 0                        | 0.001058                | 0.717579 | 0.977129 |
| <i>Pseudomonas</i>             | 1.013387           | 0.005975               | 0.315563              | 0.831478             | 0.007382                 | 0.350753                | 0.73317  | 0.991328 |
| <i>Lysobacter</i>              | 0.004106           | 0                      | 0.002656              | 0.003152             | 0                        | 0.000979                | 0.763567 | 1        |
| <i>Tepidibacter</i>            | 0.003348           | 0                      | 0.001816              | 0.004199             | 0                        | 0.001839                | 0.768094 | 1        |
| <i>Geodermatophilus</i>        | 0.008128           | 0                      | 0.002531              | 0.009398             | 1.00E-06                 | 0.00308                 | 0.774959 | 1        |

| Genus                    | mean of Z31DSO (%) | variance of Z31DSO (%) | std.err of Z31DSO (%) | mean of Z31J1DSO (%) | variance of Z31J1DSO (%) | std.err of Z31J1DSO (%) | <i>p</i> -vlaue | FDR |
|--------------------------|--------------------|------------------------|-----------------------|----------------------|--------------------------|-------------------------|-----------------|-----|
| <i>Fluviicola</i>        | 0.005116           | 1.00E-06               | 0.003336              | 0.003881             | 0                        | 0.001991                | 0.775327        | 1   |
| <i>Kribbella</i>         | 0.034127           | 1.00E-06               | 0.003947              | 0.03933              | 1.50E-05                 | 0.016054                | 0.777468        | 1   |
| <i>Nannocystis</i>       | 0.003588           | 0                      | 0.001635              | 0.002976             | 0                        | 0.001117                | 0.782392        | 1   |
| <i>Novosphingobium</i>   | 0.123594           | 2.10E-05               | 0.018662              | 0.110767             | 8.40E-05                 | 0.037315                | 0.783749        | 1   |
| <i>Rhizobium</i>         | 0.07609            | 2.20E-05               | 0.0191                | 0.09785              | 0.000291                 | 0.069608                | 0.788164        | 1   |
| <i>Comamonas</i>         | 0.126141           | 0.000102               | 0.041257              | 0.144225             | 0.000139                 | 0.048059                | 0.798602        | 1   |
| <i>Hylemonella</i>       | 1.09342            | 0.002347               | 0.197765              | 1.245899             | 0.015392                 | 0.506484                | 0.802702        | 1   |
| <i>Cellvibrio</i>        | 0.010639           | 1.00E-06               | 0.003934              | 0.012099             | 1.00E-06                 | 0.004009                | 0.816889        | 1   |
| <i>Solitalea</i>         | 0.003201           | 0                      | 0.001244              | 0.004108             | 1.00E-06                 | 0.00355                 | 0.829789        | 1   |
| <i>Coxiella</i>          | 0.005021           | 0                      | 0.002207              | 0.004344             | 0                        | 0.001801                | 0.83245         | 1   |
| <i>Chitinophaga</i>      | 0.59642            | 0.003035               | 0.224925              | 0.532463             | 0.001689                 | 0.167798                | 0.839515        | 1   |
| <i>Amycolatopsis</i>     | 0.06161            | 4.00E-06               | 0.008236              | 0.058325             | 8.00E-06                 | 0.011836                | 0.839854        | 1   |
| <i>Microbacterium</i>    | 0.007104           | 0                      | 0.002879              | 0.006335             | 0                        | 0.001885                | 0.843228        | 1   |
| <i>Kaistia</i>           | 0.007155           | 1.00E-06               | 0.003808              | 0.008625             | 2.00E-06                 | 0.005682                | 0.84862         | 1   |
| <i>Ellin506</i>          | 0.041657           | 3.00E-06               | 0.006923              | 0.038846             | 8.00E-06                 | 0.011552                | 0.852994        | 1   |
| <i>Shewanella</i>        | 0.014265           | 1.00E-06               | 0.003263              | 0.015183             | 1.00E-06                 | 0.003237                | 0.860023        | 1   |
| <i>Phycococcus</i>       | 0.007553           | 0                      | 0.002113              | 0.006981             | 0                        | 0.002128                | 0.865117        | 1   |
| <i>Phenyllobacterium</i> | 0.279938           | 1.80E-05               | 0.017301              | 0.283617             | 8.00E-06                 | 0.011441                | 0.875322        | 1   |
| <i>Legionella</i>        | 0.009891           | 1.00E-06               | 0.004192              | 0.00904              | 1.00E-06                 | 0.003301                | 0.886251        | 1   |
| <i>Pseudonocardia</i>    | 0.031432           | 1.00E-06               | 0.003959              | 0.032513             | 2.00E-06                 | 0.005534                | 0.886456        | 1   |
| <i>Halomonas</i>         | 0.03672            | 5.00E-06               | 0.009365              | 0.03824              | 1.00E-06                 | 0.003646                | 0.892357        | 1   |
| <i>Rhodococcus</i>       | 0.223317           | 0.000345               | 0.075803              | 0.209916             | 0.000143                 | 0.048742                | 0.894667        | 1   |
| <i>Iamia</i>             | 0.006062           | 0                      | 0.002329              | 0.005673             | 0                        | 0.001231                | 0.894994        | 1   |
| <i>Rhodoplanes</i>       | 0.550006           | 0.00014                | 0.048269              | 0.5594               | 0.000114                 | 0.043591                | 0.896842        | 1   |
| <i>Acinetobacter</i>     | 0.027249           | 2.00E-06               | 0.005131              | 0.028849             | 6.00E-06                 | 0.010231                | 0.899901        | 1   |
| <i>Bradyrhizobium</i>    | 0.586447           | 0.000513               | 0.092502              | 0.604263             | 0.000718                 | 0.109381                | 0.910602        | 1   |
| <i>Cellulomonas</i>      | 0.002855           | 0                      | 0.001529              | 0.003064             | 0                        | 0.001639                | 0.932292        | 1   |
| <i>Nocardioides</i>      | 0.187506           | 4.80E-05               | 0.028151              | 0.183506             | 6.30E-05                 | 0.032529                | 0.93255         | 1   |
| <i>Cystobacter</i>       | 0.025938           | 4.00E-06               | 0.008407              | 0.024409             | 1.40E-05                 | 0.015016                | 0.935135        | 1   |

| Genus                           | mean of Z31DSO (%) | variance of Z31DSO (%) | std.err of Z31DSO (%) | mean of Z31J1DSO (%) | variance of Z31J1DSO (%) | std.err of Z31J1DSO (%) | <i>p</i> -value | FDR |
|---------------------------------|--------------------|------------------------|-----------------------|----------------------|--------------------------|-------------------------|-----------------|-----|
| <i>Nitrospira</i>               | 0.478792           | 0.000167               | 0.052696              | 0.472578             | 0.00027                  | 0.067033                | 0.946784        | 1   |
| <i>Candidatus_Solibacter</i>    | 1.249083           | 0.001061               | 0.132949              | 1.261896             | 0.000904                 | 0.122725                | 0.948292        | 1   |
| <i>Oryzihumus</i>               | 0.032702           | 2.00E-06               | 0.005943              | 0.032004             | 4.00E-06                 | 0.007888                | 0.948374        | 1   |
| <i>Ammoniphilus</i>             | 0.01344            | 0                      | 0.00274               | 0.013265             | 0                        | 0.002138                | 0.961912        | 1   |
| <i>Sporocytophaga</i>           | 0.014223           | 0                      | 0.002599              | 0.014012             | 1.00E-06                 | 0.003657                | 0.96393         | 1   |
| <i>Parvibaculum</i>             | 0.003488           | 0                      | 0.001684              | 0.00362              | 0                        | 0.002289                | 0.964749        | 1   |
| <i>Janthinobacterium</i>        | 0.401154           | 0.000124               | 0.045468              | 0.398251             | 0.000383                 | 0.079927                | 0.974064        | 1   |
| <i>Candidatus_Glomeribacter</i> | 0.00836            | 1.00E-06               | 0.003095              | 0.008276             | 0                        | 0.00254                 | 0.981596        | 1   |
| <i>Skermanella</i>              | 0.031689           | 2.00E-06               | 0.005764              | 0.031949             | 1.30E-05                 | 0.014977                | 0.984111        | 1   |
| <i>Pirellula</i>                | 0.155017           | 2.50E-05               | 0.020556              | 0.155064             | 5.00E-06                 | 0.009417                | 0.992906        | 1   |
| <i>Actinocorallia</i>           | 0.001111           | 0                      | 0.001111              | 0.000817             | 0                        | 0.000522                | 1               | 1   |
| <i>Chlamydomonas</i>            | 0.001467           | 0                      | 0.000968              | 0.001129             | 0                        | 0.000517                | 1               | 1   |
| <i>Desulfosporosinus</i>        | 0.001505           | 0                      | 0.000983              | 0.001399             | 0                        | 0.000962                | 1               | 1   |
| <i>Erwinia</i>                  | 0.001576           | 0                      | 0.001576              | 0.001477             | 0                        | 0.001477                | 1               | 1   |
| <i>Inquilius</i>                | 0.001111           | 0                      | 0.001111              | 0.000807             | 0                        | 0.000529                | 1               | 1   |
| <i>Kineosporia</i>              | 0.001027           | 0                      | 0.001027              | 0.001446             | 0                        | 0.001446                | 1               | 1   |
| <i>Staphylococcus</i>           | 0.00213            | 0                      | 0.000683              | 0.002277             | 0                        | 0.002277                | 1               | 1   |
| <i>Syntrophomonas</i>           | 0.000846           | 0                      | 0.000573              | 0.000911             | 0                        | 0.000911                | 1               | 1   |

Note 1. The relative abundances of taxons in the surrounding soils, whose *p*-value were labeled by orange color, were significantly different ( $p < 0.05$ ) between the glyphosate treated line Z31 and its control Z31 without glyphosate treatment.

Table S9. Differentially relative abundances of main N-fixing genera between Z31DRh &amp; Z31J1DRh(16S).

| Genus                   | mean of Z31DRh (%) | variance of Z31DRh (%) | std.err of Z31DRh (%) | mean of Z31J1DRh (%) | variance of Z31J1DRh (%) | std.err of Z31J1DRh (%) | <i>p</i> -value | FDR      | Genus                   | mean of Z31DSO (%) | variance of Z31DSO (%) | std.err of Z31DSO (%) | mean of Z31J1DSO (%) | variance of Z31J1DSO (%) | std.err of Z31J1DSO (%) | <i>p</i> -value | FDR      |
|-------------------------|--------------------|------------------------|-----------------------|----------------------|--------------------------|-------------------------|-----------------|----------|-------------------------|--------------------|------------------------|-----------------------|----------------------|--------------------------|-------------------------|-----------------|----------|
| <i>Aminobacter</i>      | 0.001246           | 0                      | 0.001054              | 0.000337             | 0                        | 0.000337                | 0.397123        | 0.75626  | <i>Aminobacter</i>      | ND                 |                        |                       | ND                   |                          |                         |                 |          |
| <i>Bradyrhizobium</i>   | <b>1.184853</b>    | 0.006234               | 0.322327              | <b>0.678573</b>      | 0.002391                 | 0.199621                | 0.196045        | 0.636192 | <i>Bradyrhizobium</i>   | 0.586447           | 0.000513               | 0.092502              | 0.604263             | 0.000718                 | 0.109381                | 0.910602        | 1        |
| <i>Devosia</i>          | 0.005737           | 0                      | 0.001684              | 0.001362             | 0                        | 0.000679                | <b>0.024118</b> | 0.514066 | <i>Devosia</i>          | 0                  | 0                      | 0                     | 0.002201             | 0                        | 0.002201                | 0.362965        | 0.804319 |
| <i>Mesorhizobium</i>    | 0.141725           | 1.10E-05               | 0.013719              | 0.139498             | 4.60E-05                 | 0.027765                | 0.952174        | 1        | <i>Mesorhizobium</i>    | 0.087997           | 1.90E-05               | 0.017897              | 0.061998             | 1.70E-05                 | 0.016811                | 0.334076        | 0.787755 |
| <i>Methylobacterium</i> | 0.017552           | 1.00E-06               | 0.003815              | 0.019404             | 1.00E-06                 | 0.004326                | 0.800219        | 0.984019 | <i>Methylobacterium</i> | 0.015684           | 2.00E-06               | 0.00515               | 0.024839             | 2.00E-06                 | 0.006064                | 0.287485        | 0.780912 |
| <i>Ochrobactrum</i>     | 0.038944           | 1.40E-05               | 0.015504              | 0.013811             | 2.00E-06                 | 0.005434                | 0.133584        | 0.594448 | <i>Ochrobactrum</i>     | ND                 |                        |                       | ND                   |                          |                         |                 |          |
| <i>Rhizobium</i>        | <b>0.125225</b>    | 8.40E-05               | 0.037487              | 0.051258             | 1.00E-05                 | 0.013152                | 0.067831        | 0.546803 | <i>Rhizobium</i>        | 0.076090           | 2.20E-05               | 0.0191                | 0.09785              | 0.000291                 | 0.069608                | 0.788164        | 1        |
| <i>Burkholderia</i>     | <b>0.805959</b>    | 0.000786               | 0.11448               | <b>1.139264</b>      | 0.000774                 | 0.113578                | <b>0.047444</b> | 0.546803 | <i>Burkholderia</i>     | 0.370188           | 0.000192               | 0.056543              | 0.503716             | 0.000198                 | 0.057432                | 0.116462        | 0.702747 |
| <i>Agrobacterium</i>    | 0.191973           | 7.70E-05               | 0.035877              | 0.122559             | 9.30E-05                 | 0.039331                | 0.206725        | 0.644869 | <i>Agrobacterium</i>    | 0.080939           | 1.00E-05               | 0.012899              | 0.240053             | 0.000881                 | 0.121152                | 0.220918        | 0.780912 |
| <i>Achromobacter</i>    | <b>0.081919</b>    | 4.30E-05               | 0.026724              | 0.040362             | 3.60E-05                 | 0.024378                | 0.282365        | 0.664924 | <i>Achromobacter</i>    | 0.025822           | 6.00E-06               | 0.009712              | 0.015107             | 1.00E-06                 | 0.003533                | 0.344643        | 0.787755 |
| <i>Acinetobacter</i>    | 0.035084           | 1.80E-05               | 0.017349              | 0.011412             | 1.00E-06                 | 0.003993                | 0.197539        | 0.636192 | <i>Acinetobacter</i>    | 0.027249           | 2.00E-06               | 0.005131              | 0.028849             | 6.00E-06                 | 0.010231                | 0.899901        | 1        |
| <i>Bacillus</i>         | 0.107684           | 2.70E-05               | 0.0213                | 0.122934             | 2.80E-05                 | 0.02143                 | 0.692652        | 0.945884 | <i>Bacillus</i>         | 0.094189           | 3.10E-05               | 0.022603              | 0.137099             | 0.000102                 | 0.041148                | 0.414421        | 0.804319 |
| <i>Paenibacillus</i>    | 0.149630           | 0.000108               | 0.042387              | 0.389685             | 0.001555                 | 0.16099                 | 0.155208        | 0.619539 | <i>Paenibacillus</i>    | 0.174227           | 0.000131               | 0.04665               | 0.284235             | 0.00072                  | 0.109521                | 0.408942        | 0.804319 |
| <i>Pseudomonas</i>      | 0.560060           | 0.000236               | 0.062759              | 0.542984             | 0.002749                 | 0.214058                | 0.949056        | 1        | <i>Pseudomonas</i>      | 1.013387           | 0.005975               | 0.315563              | 0.831478             | 0.007382                 | 0.350753                | 0.733170        | 0.991328 |
| <i>Stenotrophomonas</i> | <b>0.080699</b>    | 4.30E-05               | 0.026801              | 0.043544             | 5.00E-05                 | 0.028937                | 0.422163        | 0.774096 | <i>Stenotrophomonas</i> | 0.024522           | 3.00E-06               | 0.007454              | 0.038002             | 8.00E-06                 | 0.011763                | 0.384626        | 0.804319 |

Note 1. SUM of main symbiotic nitrogen-fixing bacterial genera

2.513

0.546

2.166

0.404

Note 2. SUM of above main symbiotic and associate nitrogen-fixing bacterial genera

3.528

0.743

3.317

0.858

Note 3. SUM of main symbiotic nitrogen-fixing bacterial genera

1.217

0.204

1.535

0.383

Note 4. SUM of above main symbiotic and associate nitrogen-fixing bacterial genera.

2.577

0.611

2.870

0.910

Note 5. Table cells were filled with grey color indicated those genera are associate nitrogen fixing genera.

Note 6. Digits with red color indicated that the relative abundance of the genus in one sample was obviously higher than that of the other sample.

Note 7. Table cells were filled with orange color indicated that *p*-value was less than 0.05.

**Table S10. Absolute abundances of main N-fixing genera in rhizosphere and surrounding soils of Z31&Z31J1(16S)**

| Absolute abundance of main nitrogen-fixing genera in Rhizosphere soil                                   |                                                                                                           |         |         |         |         |         |         |                   |           |           |           |           |           | Absolute abundance of main nitrogen-fixing genera in Surrounding soil |                     |         |          |         |         |         |         |         |                   |           |           |           |           |           |           |                     |   |
|---------------------------------------------------------------------------------------------------------|-----------------------------------------------------------------------------------------------------------|---------|---------|---------|---------|---------|---------|-------------------|-----------|-----------|-----------|-----------|-----------|-----------------------------------------------------------------------|---------------------|---------|----------|---------|---------|---------|---------|---------|-------------------|-----------|-----------|-----------|-----------|-----------|-----------|---------------------|---|
| OTU No.                                                                                                 | Taxonomy                                                                                                  | Z31DRh1 | Z31DRh2 | Z31DRh3 | Z31DRh4 | Z31DRh5 | Z31DRh6 | Average of Z31DRh | Z31J1DRh1 | Z31J1DRh2 | Z31J1DRh3 | Z31J1DRh4 | Z31J1DRh5 | Z31J1DRh6                                                             | Average of Z31J1DRh | OTU No. | Z31DSO1r | Z31DSO2 | Z31DSO3 | Z31DSO4 | Z31DSO5 | Z31DSO6 | Average of Z31DSO | Z31J1DSO1 | Z31J1DSO2 | Z31J1DSO3 | Z31J1DSO4 | Z31J1DSO5 | Z31J1DSO6 | Average of Z31J1DSO |   |
| Otu2514                                                                                                 | <i>Bacteria; Proteobacteria; Alphaproteobacteria; Rhizobiales; Phyllobacteriaceae; Aminobacter</i>        | 3       | 0       | 0       | 0       | 0       | 0       | 1                 | 0.7       | 1         | 0         | 0         | 0         | 0                                                                     | 0                   | 0.0     | ND       | ND      | ND      | ND      | ND      | ND      | ND                | ND        | ND        | ND        | ND        | ND        | ND        | ND                  |   |
| Otu8                                                                                                    | <i>Bacteria; Proteobacteria; Alphaproteobacteria; Rhizobiales; Bradyrhizobiaceae; Bradyrhizobium</i>      | 426     | 216     | 349     | 1817    | 1090    | 580     | 746.3             | 353       | 274       | 220       | 139       | 197       | 721                                                                   | 310.2               | Otu23   | 316      | 142     | 356     | 178     | 204     | 136     | 222.0             | 600       | 142       | 218       | 243       | 192       | 198       | 198.6               |   |
| Otu1363                                                                                                 | <i>Bacteria; Proteobacteria; Alphaproteobacteria; Rhizobiales; Hyphomicrobiaceae; Devosia</i>             | 5       | 1       | 3       | 2       | 1       | 10      | 3.7               | 0         | 2         | 1         | 1         | 0         | 0                                                                     | 0.8                 | Otu1314 | 0        | 0       | 0       | 0       | 0       | 0       | 0.0               | 7         | 0         | 0         | 0         | 0         | 0         | 0                   | 0 |
| Otu245                                                                                                  | <i>Bacteria; Proteobacteria; Alphaproteobacteria; Rhizobiales; Phyllobacteriaceae; Mesorhizobium</i>      | 80      | 55      | 84      | 121     | 47      | 130     | 86.2              | 65        | 36        | 108       | 50        | 37        | 101                                                                   | 66.4                | Otu286  | 45       | 38      | 57      | 25      | 13      | 22      | 33.3              | 76        | 11        | 20        | 16        | 23        | 21        | 18.2                |   |
| Otu555                                                                                                  | <i>Bacteria; Proteobacteria; Alphaproteobacteria; Rhizobiales; Methylobacteriaceae; Methylobacterium</i>  | 7       | 4       | 9       | 12      | 6       | 34      | 12.0              | 10        | 5         | 19        | 8         | 10        | 4                                                                     | 9.2                 | Otu604  | 1        | 1       | 4       | 14      | 5       | 10      | 5.8               | 13        | 10        | 5         | 6         | 24        | 6         | 10.2                |   |
| Otu243                                                                                                  | <i>Bacteria; Proteobacteria; Alphaproteobacteria; Rhizobiales; Brucellaceae; Ochrobactrum</i>             | 11      | 8       | 6       | 29      | 15      | 112     | 30.2              | 3         | 3         | 1         | 6         | 8         | 17                                                                    | 7.0                 | ND      | ND       | ND      | ND      | ND      | ND      | ND      | ND                | ND        | ND        | ND        | ND        | ND        | ND        | ND                  |   |
| Otu114                                                                                                  | <i>Bacteria; Proteobacteria; Alphaproteobacteria; Rhizobiales; Rhizobiaceae; Rhizobium</i>                | 57      | 25      | 59      | 286     | 19      | 96      | 90.3              | 43        | 17        | 8         | 21        | 14        | 42                                                                    | 20.4                | Otu41   | 29       | 13      | 47      | 17      | 40      | 18      | 27.3              | 236       | 8         | 4         | 16        | 16        | 14        | 11.6                |   |
| MIXED                                                                                                   | <i>Bacteria; Proteobacteria; Betaproteobacteria; Burkholderiales; Burkholderiaceae; Burkholderia</i>      | 277     | 224     | 528     | 697     | 328     | 1049    | 517.2             | 570       | 475       | 646       | 637       | 306       | 622                                                                   | 537.2               | MIXED   | 188      | 83      | 217     | 202     | 54      | 132     | 146.0             | 394       | 162       | 206       | 229       | 155       | 150       | 180.4               |   |
| MIXED                                                                                                   | <i>Bacteria; Proteobacteria; Alphaproteobacteria; Rhizobiales; Rhizobiaceae; Agrobacterium</i>            | 63      | 29      | 117     | 239     | 127     | 148     | 120.5             | 52        | 71        | 37        | 42        | 10        | 133                                                                   | 58.6                | MIXED   | 41       | 21      | 48      | 24      | 30      | 18      | 30.3              | 293       | 12        | 21        | 318       | 24        | 21        | 79.2                |   |
| Otu140                                                                                                  | <i>Bacteria; Proteobacteria; Betaproteobacteria; Burkholderiales; Alcaligenaceae; Achromobacter</i>       | 43      | 12      | 36      | 66      | 9       | 196     | 60.3              | 2         | 13        | 20        | 4         | 2         | 70                                                                    | 21.8                | Otu587  | 9        | 6       | 17      | 3       | 1       | 20      | 9.3               | 16        | 3         | 7         | 7         | 3         | 4         | 4.8                 |   |
| MIXED                                                                                                   | <i>Bacteria; Proteobacteria; Gammaproteobacteria; Pseudomonadales; Moraxellaceae; Acinetobacter;</i>      | 6       | 0       | 42      | 79      | 3       | 12      | 23.7              | 11        | 10        | 5         | 0         | 0         | 7                                                                     | 4.4                 | MIXED   | 11       | 5       | 9       | 10      | 9       | 16      | 10.0              | 5         | 19        | 6         | 8         | 4         | 24        | 12.2                |   |
| MIXED                                                                                                   | <i>Bacteria; Firmicutes; Bacilli; Bacillales; Bacillaceae; Bacillus;</i>                                  | 34      | 95      | 35      | 72      | 51      | 92      | 63.2              | 91        | 77        | 31        | 80        | 42        | 33                                                                    | 52.6                | Otu134  | 4        | 12      | 44      | 24      | 19      | 48      | 25.2              | 109       | 11        | 20        | 32        | 112       | 26        | 40.2                |   |
| MIXED                                                                                                   | <i>Bacteria; Firmicutes; Bacilli; Bacillales; Paenibacillaceae; Paenibacillus</i>                         | 96      | 46      | 65      | 312     | 37      | 33      | 98.2              | 209       | 41        | 121       | 210       | 14        | 493                                                                   | 175.8               | MIXED   | 30       | 41      | 115     | 42      | 89      | 44      | 60.2              | 111       | 142       | 50        | 36        | 43        | 283       | 110.8               |   |
| MIXED                                                                                                   | <i>Bacteria; Proteobacteria; Gammaproteobacteria; Pseudomonadales; Pseudomonadaceae; Pseudomonas;</i>     | 259     | 226     | 259     | 514     | 158     | 802     | 369.7             | 110       | 67        | 588       | 99        | 117       | 552                                                                   | 284.6               | Otu119  | 73       | 26      | 34      | 96      | 16      | 18      | 43.8              | 19        | 19        | 28        | 44        | 11        | 98        | 40                  |   |
| MIXED                                                                                                   | <i>Bacteria; Proteobacteria; Gammaproteobacteria; Xanthomonadales; Xanthomonadaceae; Stenotrophomonas</i> | 46      | 7       | 84      | 58      | 9       | 94      | 49.7              | 16        | 14        | 2         | 4         | 1         | 82                                                                    | 20.6                | MIXED   | 1        | 2       | 11      | 11      | 10      | 16      | 8.5               | 20        | 24        | 1         | 8         | 12        | 27        | 14.4                |   |
| SUM of absolute abundance of above main symbiotic nitrogen-fixing bacteria at genus level               |                                                                                                           | 929     | 562     | 1155    | 3203    | 1633    | 2160    | 1607.0            | 1097      | 883       | 1040      | 904       | 582       | 1640                                                                  | 1024.33             | 0       | 620      | 298     | 729     | 460     | 346     | 336     | 464.8             | 1619      | 345       | 474       | 828       | 434       | 410       | 498.2               |   |
| SUM of absolute abundance of above main symbiotic and associate nitrogen-fixing bacteria at genus level |                                                                                                           | 1413    | 948     | 1676    | 4304    | 1900    | 3389    | 2271.7            | 1536      | 1105      | 1807      | 1301      | 758       | 2877                                                                  | 1564.0              | 0       | 748      | 390     | 959     | 646     | 490     | 498     | 621.8             | 1899      | 563       | 586       | 963       | 619       | 872       | 720.6               |   |

Note 1. ND = Not Detected.

| #OTU_number                    | Z31DRh1    | Z31DRh2    | Z31DRh3    | Z31DRh4r   | Z31DRh5    | Z31DRh6r    | Z31J1DRh1  | Z31J1DRh2  | Z31J1DRh3  | Z31J1DRh4  | Z31J1DRh5  | Z31J1DRh6  | Taxonomy                                                                                                                            |
|--------------------------------|------------|------------|------------|------------|------------|-------------|------------|------------|------------|------------|------------|------------|-------------------------------------------------------------------------------------------------------------------------------------|
| Otu3824                        | 0          | 0          | 1          | 2          | 0          | 3           | 2          | 1          | 0          | 1          | 0          | 0          | 0 Bacteria; Firmicutes; Bacilli; Bacillales; Paenibacillaceae; Paenibacillus                                                        |
| Otu4029                        | 0          | 0          | 2          | 3          | 0          | 1           | 1          | 0          | 0          | 1          | 1          | 1          | 1 Bacteria; Firmicutes; Bacilli; Bacillales; Paenibacillaceae; Paenibacillus                                                        |
| Otu2677                        | 0          | 0          | 2          | 0          | 0          | 2           | 0          | 0          | 0          | 1          | 0          | 0          | 0 Bacteria; Firmicutes; Bacilli; Bacillales; Paenibacillaceae; Paenibacillus                                                        |
| Otu183                         | 54         | 16         | 21         | 176        | 12         | 4           | 112        | 16         | 55         | 130        | 0          | 0          | 116 Bacteria; Firmicutes; Bacilli; Bacillales; Paenibacillaceae; Paenibacillus                                                      |
| Otu1819                        | 0          | 0          | 2          | 5          | 0          | 0           | 0          | 0          | 0          | 0          | 0          | 0          | 2 Bacteria; Firmicutes; Bacilli; Bacillales; Paenibacillaceae; Paenibacillus                                                        |
| Otu4194                        | 0          | 0          | 0          | 0          | 1          | 1           | 3          | 1          | 0          | 2          | 1          | 0          | 2 Bacteria; Firmicutes; Bacilli; Bacillales; Paenibacillaceae; Paenibacillus                                                        |
| Otu3631                        | 3          | 0          | 0          | 0          | 0          | 0           | 0          | 0          | 0          | 0          | 0          | 0          | 0 Bacteria; Firmicutes; Bacilli; Bacillales; Paenibacillaceae; Paenibacillus                                                        |
| Otu3246                        | 0          | 0          | 0          | 0          | 0          | 0           | 0          | 0          | 0          | 2          | 0          | 0          | 0 Bacteria; Firmicutes; Bacilli; Bacillales; Paenibacillaceae; Paenibacillus                                                        |
| Otu714                         | 3          | 1          | 0          | 34         | 14         | 5           | 1          | 0          | 1          | 1          | 0          | 0          | 4 Bacteria; Firmicutes; Bacilli; Bacillales; Paenibacillaceae; Paenibacillus                                                        |
| Otu1878                        | 0          | 0          | 10         | 13         | 3          | 8           | 5          | 3          | 0          | 3          | 1          | 1          | 1 Bacteria; Firmicutes; Bacilli; Bacillales; Paenibacillaceae; Paenibacillus                                                        |
| Otu3605                        | 0          | 0          | 0          | 0          | 0          | 0           | 0          | 0          | 2          | 0          | 0          | 0          | 0 Bacteria; Firmicutes; Bacilli; Bacillales; Paenibacillaceae; Paenibacillus                                                        |
| Otu2833                        | 0          | 0          | 0          | 0          | 0          | 0           | 0          | 2          | 0          | 0          | 0          | 0          | 0 Bacteria; Firmicutes; Bacilli; Bacillales; Paenibacillaceae; Paenibacillus                                                        |
| Otu3571                        | 0          | 0          | 0          | 6          | 0          | 3           | 0          | 0          | 0          | 0          | 0          | 1          | 0 Bacteria; Firmicutes; Bacilli; Bacillales; Paenibacillaceae; Paenibacillus                                                        |
| Otu277                         | 1          | 12         | 6          | 13         | 4          | 4           | 32         | 5          | 3          | 34         | 6          | 6          | 88 Bacteria; Firmicutes; Bacilli; Bacillales; Paenibacillaceae; Paenibacillus; Paenibacillus_chondroitinus                          |
| Otu2540                        | 0          | 0          | 0          | 0          | 0          | 0           | 0          | 0          | 0          | 2          | 0          | 0          | 6 Bacteria; Firmicutes; Bacilli; Bacillales; Paenibacillaceae; Paenibacillus                                                        |
| Otu1553                        | 0          | 0          | 0          | 9          | 1          | 0           | 2          | 2          | 1          | 2          | 1          | 1          | 1 Bacteria; Firmicutes; Bacilli; Bacillales; Paenibacillaceae; Paenibacillus                                                        |
| Otu4307                        | 0          | 0          | 0          | 0          | 0          | 0           | 0          | 1          | 0          | 0          | 2          | 0          | 0 Bacteria; Firmicutes; Bacilli; Bacillales; Paenibacillaceae; Paenibacillus                                                        |
| Otu125                         | 34         | 16         | 21         | 48         | 1          | 2           | 49         | 10         | 53         | 23         | 1          | 1          | 175 Bacteria; Firmicutes; Bacilli; Bacillales; Paenibacillaceae; Paenibacillus                                                      |
| Otu1770                        | 1          | 1          | 0          | 3          | 1          | 0           | 2          | 0          | 6          | 8          | 0          | 0          | 97 Bacteria; Firmicutes; Bacilli; Bacillales; Paenibacillaceae; Paenibacillus                                                       |
| <b>SUM of Paenibacillus</b>    | <b>96</b>  | <b>46</b>  | <b>65</b>  | <b>312</b> | <b>37</b>  | <b>33</b>   | <b>209</b> | <b>41</b>  | <b>121</b> | <b>210</b> | <b>14</b>  | <b>493</b> |                                                                                                                                     |
| Otu34                          | 215        | 172        | 331        | 412        | 286        | 867         | 474        | 352        | 535        | 596        | 237        | 513        | Bacteria; Proteobacteria; Betaproteobacteria; Burkholderiales; Burkholderiaceae; Burkholderia                                       |
| Otu210                         | 35         | 34         | 114        | 111        | 29         | 121         | 56         | 75         | 41         | 21         | 38         | 60         | Bacteria; Proteobacteria; Betaproteobacteria; Burkholderiales; Burkholderiaceae; Burkholderia                                       |
| Otu1129                        | 27         | 18         | 83         | 174        | 13         | 61          | 40         | 48         | 70         | 20         | 31         | 49         | Bacteria; Proteobacteria; Betaproteobacteria; Burkholderiales; Burkholderiaceae; Burkholderia                                       |
| <b>SUM of Burkholderia</b>     | <b>277</b> | <b>224</b> | <b>528</b> | <b>697</b> | <b>328</b> | <b>1049</b> | <b>570</b> | <b>475</b> | <b>646</b> | <b>637</b> | <b>306</b> | <b>622</b> |                                                                                                                                     |
| Otu355                         | 9          | 1          | 18         | 48         | 10         | 11          | 0          | 1          | 1          | 2          | 2          | 4          | Bacteria; Proteobacteria; Alphaproteobacteria; Rhizobiales; Rhizobiaceae; Agrobacterium; Agrobacterium_vitis                        |
| Otu155                         | 54         | 28         | 99         | 191        | 117        | 137         | 52         | 70         | 36         | 40         | 8          | 129        | Bacteria; Proteobacteria; Alphaproteobacteria; Rhizobiales; Rhizobiaceae; Agrobacterium                                             |
| <b>SUM of Agrobacterium</b>    | <b>63</b>  | <b>29</b>  | <b>117</b> | <b>239</b> | <b>127</b> | <b>148</b>  | <b>52</b>  | <b>71</b>  | <b>37</b>  | <b>42</b>  | <b>10</b>  | <b>133</b> |                                                                                                                                     |
| Otu337                         | 2          | 0          | 31         | 73         | 3          | 7           | 2          | 5          | 5          | 0          | 0          | 5          | Bacteria; Proteobacteria; Gammaproteobacteria; Pseudomonadales; Moraxellaceae; Acinetobacter; Acinetobacter_johnsonii               |
| Otu1047                        | 4          | 0          | 11         | 6          | 0          | 5           | 9          | 5          | 0          | 0          | 0          | 2          | Bacteria; Proteobacteria; Gammaproteobacteria; Pseudomonadales; Moraxellaceae; Acinetobacter; Acinetobacter_rhizosphaerae           |
| <b>SUM of Acinetobacter</b>    | <b>6</b>   | <b>0</b>   | <b>42</b>  | <b>79</b>  | <b>3</b>   | <b>12</b>   | <b>11</b>  | <b>10</b>  | <b>5</b>   | <b>0</b>   | <b>0</b>   | <b>7</b>   |                                                                                                                                     |
| Otu1075                        | 2          | 14         | 1          | 5          | 3          | 10          | 8          | 6          | 1          | 10         | 3          | 3          | Bacteria; Firmicutes; Bacilli; Bacillales; Bacillaceae; Bacillus; Bacillus_selenatarsenatis                                         |
| Otu3005                        | 28         | 74         | 29         | 56         | 39         | 64          | 73         | 61         | 30         | 49         | 31         | 24         | Bacteria; Firmicutes; Bacilli; Bacillales; Bacillaceae; Bacillus; Bacillus_flexus                                                   |
| Otu627                         | 4          | 7          | 5          | 11         | 9          | 18          | 10         | 10         | 0          | 21         | 8          | 6          | Bacteria; Firmicutes; Bacilli; Bacillales; Bacillaceae; Bacillus; Bacillus_cereus                                                   |
| <b>SUM of Bacillus</b>         | <b>34</b>  | <b>95</b>  | <b>35</b>  | <b>72</b>  | <b>51</b>  | <b>92</b>   | <b>91</b>  | <b>77</b>  | <b>31</b>  | <b>80</b>  | <b>42</b>  | <b>33</b>  |                                                                                                                                     |
| Otu26                          | 201        | 127        | 176        | 382        | 144        | 577         | 45         | 42         | 541        | 90         | 98         | 446        | Bacteria; Proteobacteria; Gammaproteobacteria; Pseudomonadales; Pseudomonadaceae; Pseudomonas; Pseudomonas_nitroreducens            |
| Otu128                         | 58         | 98         | 82         | 124        | 13         | 210         | 63         | 25         | 47         | 9          | 16         | 106        | Bacteria; Proteobacteria; Gammaproteobacteria; Pseudomonadales; Pseudomonadaceae; Pseudomonas; Pseudomonas_pseudoalcaligenes        |
| Otu1882                        | 0          | 1          | 1          | 8          | 1          | 15          | 2          | 0          | 0          | 0          | 3          | 0          | Bacteria; Proteobacteria; Gammaproteobacteria; Pseudomonadales; Pseudomonadaceae; Pseudomonas; Pseudomonas_veronii                  |
| <b>SUM of Pseudomonas</b>      | <b>259</b> | <b>226</b> | <b>259</b> | <b>514</b> | <b>158</b> | <b>802</b>  | <b>110</b> | <b>67</b>  | <b>588</b> | <b>99</b>  | <b>117</b> | <b>552</b> |                                                                                                                                     |
| Otu280                         | 44         | 7          | 84         | 58         | 9          | 84          | 10         | 14         | 2          | 3          | 0          | 42         | Bacteria; Proteobacteria; Gammaproteobacteria; Xanthomonadales; Xanthomonadaceae; Stenotrophomonas                                  |
| Otu578                         | 2          | 0          | 0          | 0          | 0          | 10          | 6          | 0          | 0          | 1          | 1          | 40         | Bacteria; Proteobacteria; Gammaproteobacteria; Xanthomonadales; Xanthomonadaceae; Stenotrophomonas; Stenotrophomonas_acidaminiphila |
| <b>SUM of Stenotrophomonas</b> | <b>46</b>  | <b>7</b>   | <b>84</b>  | <b>58</b>  | <b>9</b>   | <b>94</b>   | <b>16</b>  | <b>14</b>  | <b>2</b>   | <b>4</b>   | <b>1</b>   | <b>82</b>  |                                                                                                                                     |



| #OTU_number                    | Z31DSO1r   | Z31DSO2   | Z31DSO3    | Z31DSO4    | Z31DSO5   | Z31DSO6    | Z31JDSO1   | Z31JDSO2   | Z31JDSO3   | Z31JDSO4   | Z31JDSO5   | Z31JDSO6   | Taxonomy                                                                                                                              |
|--------------------------------|------------|-----------|------------|------------|-----------|------------|------------|------------|------------|------------|------------|------------|---------------------------------------------------------------------------------------------------------------------------------------|
| Otu1699                        | 0          | 0         | 3          | 0          | 0         | 0          | 0          | 0          | 0          | 0          | 0          | 0          | 0 Bacteria; Firmicutes; Bacilli; Bacillales; Paenibacillaceae; Paenibacillus                                                          |
| Otu976                         | 2          | 3         | 4          | 0          | 3         | 9          | 12         | 0          | 4          | 8          | 7          | 7          | 4 Bacteria; Firmicutes; Bacilli; Bacillales; Paenibacillaceae; Paenibacillus                                                          |
| Otu2426                        | 2          | 0         | 4          | 1          | 5         | 0          | 3          | 1          | 2          | 1          | 5          | 5          | 1 Bacteria; Firmicutes; Bacilli; Bacillales; Paenibacillaceae; Paenibacillus                                                          |
| Otu194                         | 0          | 0         | 6          | 3          | 2         | 0          | 1          | 0          | 3          | 0          | 0          | 0          | 88 Bacteria; Firmicutes; Bacilli; Bacillales; Paenibacillaceae; Paenibacillus                                                         |
| Otu3084                        | 0          | 0         | 2          | 1          | 0         | 0          | 0          | 0          | 0          | 0          | 0          | 0          | 0 Bacteria; Firmicutes; Bacilli; Bacillales; Paenibacillaceae; Paenibacillus                                                          |
| Otu2698                        | 0          | 2         | 2          | 0          | 3         | 0          | 2          | 1          | 2          | 2          | 2          | 2          | 2 Bacteria; Firmicutes; Bacilli; Bacillales; Paenibacillaceae; Paenibacillus                                                          |
| Otu2362                        | 0          | 0         | 1          | 0          | 1         | 1          | 2          | 0          | 2          | 0          | 0          | 0          | 0 Bacteria; Firmicutes; Bacilli; Bacillales; Paenibacillaceae; Paenibacillus                                                          |
| Otu1150                        | 1          | 0         | 0          | 1          | 2         | 1          | 1          | 0          | 6          | 1          | 0          | 0          | 51 Bacteria; Firmicutes; Bacilli; Bacillales; Paenibacillaceae; Paenibacillus                                                         |
| Otu2848                        | 0          | 0         | 0          | 2          | 0         | 0          | 1          | 0          | 0          | 0          | 0          | 0          | 0 Bacteria; Firmicutes; Bacilli; Bacillales; Paenibacillaceae; Paenibacillus                                                          |
| Otu1376                        | 0          | 4         | 6          | 2          | 3         | 0          | 14         | 4          | 2          | 0          | 0          | 0          | 1 Bacteria; Firmicutes; Bacilli; Bacillales; Paenibacillaceae; Paenibacillus                                                          |
| Otu121                         | 0          | 3         | 11         | 3          | 2         | 3          | 10         | 27         | 7          | 9          | 3          | 3          | 96 Bacteria; Firmicutes; Bacilli; Bacillales; Paenibacillaceae; Paenibacillus                                                         |
| Otu1745                        | 0          | 1         | 0          | 1          | 0         | 0          | 4          | 0          | 0          | 1          | 2          | 2          | 1 Bacteria; Firmicutes; Bacilli; Bacillales; Paenibacillaceae; Paenibacillus                                                          |
| Otu215                         | 22         | 21        | 68         | 21         | 66        | 29         | 48         | 104        | 17         | 13         | 15         | 15         | 23 Bacteria; Firmicutes; Bacilli; Bacillales; Paenibacillaceae; Paenibacillus                                                         |
| Otu1191                        | 3          | 7         | 8          | 7          | 2         | 1          | 13         | 5          | 5          | 1          | 9          | 9          | 16 Bacteria; Firmicutes; Bacilli; Bacillales; Paenibacillaceae; Paenibacillus; Paenibacillus_chondroitinus                            |
| <b>SUM of Paenibacillus</b>    | <b>30</b>  | <b>41</b> | <b>115</b> | <b>42</b>  | <b>89</b> | <b>44</b>  | <b>111</b> | <b>142</b> | <b>50</b>  | <b>36</b>  | <b>43</b>  | <b>283</b> |                                                                                                                                       |
| Otu103                         | 133        | 57        | 77         | 124        | 29        | 105        | 221        | 108        | 164        | 186        | 104        | 104        | 117 Bacteria; Proteobacteria; Betaproteobacteria; Burkholderiales; Burkholderiaceae; Burkholderia                                     |
| Otu670                         | 29         | 14        | 100        | 57         | 12        | 22         | 119        | 39         | 19         | 28         | 17         | 17         | 21 Bacteria; Proteobacteria; Betaproteobacteria; Burkholderiales; Burkholderiaceae; Burkholderia                                      |
| Otu290                         | 26         | 12        | 40         | 21         | 13        | 5          | 54         | 15         | 23         | 15         | 34         | 34         | 12 Bacteria; Proteobacteria; Betaproteobacteria; Burkholderiales; Burkholderiaceae; Burkholderia                                      |
| <b>SUM of Burkholderia</b>     | <b>188</b> | <b>83</b> | <b>217</b> | <b>202</b> | <b>54</b> | <b>132</b> | <b>394</b> | <b>162</b> | <b>206</b> | <b>229</b> | <b>155</b> | <b>150</b> |                                                                                                                                       |
| Otu941                         | 2          | 2         | 7          | 2          | 9         | 3          | 3          | 0          | 0          | 0          | 2          | 2          | 1 Bacteria; Proteobacteria; Alphaproteobacteria; Rhizobiales; Rhizobiaceae; Agrobacterium; Agrobacterium_vitis                        |
| Otu29                          | 39         | 19        | 41         | 22         | 21        | 15         | 290        | 12         | 21         | 318        | 22         | 22         | 20 Bacteria; Proteobacteria; Alphaproteobacteria; Rhizobiales; Rhizobiaceae; Agrobacterium                                            |
| <b>SUM of Agrobacterium</b>    | <b>41</b>  | <b>21</b> | <b>48</b>  | <b>24</b>  | <b>30</b> | <b>18</b>  | <b>293</b> | <b>12</b>  | <b>21</b>  | <b>318</b> | <b>24</b>  | <b>21</b>  |                                                                                                                                       |
| Otu1464                        | 9          | 4         | 8          | 3          | 5         | 5          | 1          | 4          | 5          | 8          | 4          | 4          | 1 Bacteria; Proteobacteria; Gammaproteobacteria; Pseudomonadales; Moraxellaceae; Acinetobacter; Acinetobacter_johnsonii               |
| Otu512                         | 2          | 1         | 1          | 7          | 4         | 11         | 4          | 15         | 1          | 0          | 0          | 0          | 23 Bacteria; Proteobacteria; Gammaproteobacteria; Pseudomonadales; Moraxellaceae; Acinetobacter; Acinetobacter_rhizosphaerae          |
| <b>SUM of Acinetobacter</b>    | <b>11</b>  | <b>5</b>  | <b>9</b>   | <b>10</b>  | <b>9</b>  | <b>16</b>  | <b>5</b>   | <b>19</b>  | <b>6</b>   | <b>8</b>   | <b>4</b>   | <b>24</b>  |                                                                                                                                       |
| ND                             | ND         | ND        | ND         | ND         | ND        | ND         | ND         | ND         | ND         | ND         | ND         | ND         | Bacteria; Firmicutes; Bacilli; Bacillales; Bacillaceae; Bacillus; Bacillus_selenatarsenatis                                           |
| ND                             | ND         | ND        | ND         | ND         | ND        | ND         | ND         | ND         | ND         | ND         | ND         | ND         | Bacteria; Firmicutes; Bacilli; Bacillales; Bacillaceae; Bacillus; Bacillus_flexus                                                     |
| Otu134                         | 4          | 12        | 44         | 24         | 19        | 48         | 109        | 11         | 20         | 32         | 112        | 112        | 26 Bacteria; Firmicutes; Bacilli; Bacillales; Bacillaceae; Bacillus; Bacillus_cereus                                                  |
| <b>SUM of Bacillus</b>         |            |           |            |            |           |            |            |            |            |            |            |            |                                                                                                                                       |
| Otu119                         | 73         | 26        | 34         | 96         | 16        | 18         | 19         | 19         | 28         | 44         | 11         | 11         | 98 Bacteria; Proteobacteria; Gammaproteobacteria; Pseudomonadales; Pseudomonadaceae; Pseudomonas; Pseudomonas_nitroreducens           |
| ND                             | ND         | ND        | ND         | ND         | ND        | ND         | ND         | ND         | ND         | ND         | ND         | ND         | Bacteria; Proteobacteria; Gammaproteobacteria; Pseudomonadales; Pseudomonadaceae; Pseudomonas; Pseudomonas_pseudoalcaligenes          |
| ND                             | ND         | ND        | ND         | ND         | ND        | ND         | ND         | ND         | ND         | ND         | ND         | ND         | Bacteria; Proteobacteria; Gammaproteobacteria; Pseudomonadales; Pseudomonadaceae; Pseudomonas; Pseudomonas_yeronii                    |
| <b>SUM of Pseudomonas</b>      | <b>73</b>  | <b>26</b> | <b>34</b>  | <b>96</b>  | <b>16</b> | <b>18</b>  | <b>19</b>  | <b>19</b>  | <b>28</b>  | <b>44</b>  | <b>11</b>  | <b>98</b>  |                                                                                                                                       |
| Otu486                         | 1          | 2         | 11         | 10         | 10        | 16         | 16         | 23         | 1          | 7          | 12         | 12         | 27 Bacteria; Proteobacteria; Gammaproteobacteria; Xanthomonadales; Xanthomonadaceae; Stenotrophomonas                                 |
| Otu3359                        | 0          | 0         | 0          | 1          | 0         | 0          | 4          | 1          | 0          | 1          | 0          | 0          | 0 Bacteria; Proteobacteria; Gammaproteobacteria; Xanthomonadales; Xanthomonadaceae; Stenotrophomonas; Stenotrophomonas_acidaminiphila |
| <b>SUM of Stenotrophomonas</b> | <b>1</b>   | <b>2</b>  | <b>11</b>  | <b>11</b>  | <b>10</b> | <b>16</b>  | <b>20</b>  | <b>24</b>  | <b>1</b>   | <b>8</b>   | <b>12</b>  | <b>27</b>  |                                                                                                                                       |

**Table S11. Quality control report and statistical summary of assembled metagenome sequencing data.**

| Assembly Software             | IDBA-UD     |             | SOAPdenovo2 |            |
|-------------------------------|-------------|-------------|-------------|------------|
|                               | MGZ31DRh    | MGZ31J1DRh  | MGZ31DRh    | MGZ31J1DRh |
| Raw reads                     | 76,137,196  | 76,136,810  | 76,137,196  | 76,136,810 |
| Total clean reads             | 74,051,686  | 73,890,210  | 74,051,686  | 73,890,210 |
| Clean reads/Raw reads (%)     | 97.26       | 97.05       | 97.26       | 97.05      |
| Read length (bp)              | 125         | 125         | 125         | 125        |
| Total Clean Data (Gbp)        | 9.26        | 9.24        | 9.26        | 9.24       |
| Q20 (%) <sup>1</sup>          | 92.56       | 92.68       | 92.56       | 92.68      |
| Q30 (%) <sup>2</sup>          | 85.31       | 85.49       | 85.31       | 85.49      |
| Kmer (bp)                     | 25 ~ 115    | 25 ~ 115    | 49          | 49         |
| Contig Number                 | 278,027     | 311,185     | 30,740      | 38,765     |
| Assembly Length (bp)          | 284,282,204 | 331,098,452 | 34,031,196  | 40,198,245 |
| N50 (bp)                      | 1036        | 1099        | 1173        | 1084       |
| N90 (bp)                      | 548         | 555         | 580         | 576        |
| Max size (bp)                 | 131,028     | 133,181     | 99,923      | 36,645     |
| Min size (bp)                 | 500         | 500         | 500         | 500        |
| Average Size (bp)             | 1023        | 1064        | 1107        | 1036       |
| Mapped reads                  | 1,933,928   | 3,628,691   | 272,249     | 321,585    |
| Mapping rate (%) <sup>3</sup> | 2.6116      | 4.9109      | 0.3676      | 0.4352     |

<sup>1</sup> Q20 of MGZ31DRh or MGZ31J1DRh were more than 85%, the quality control standard.

<sup>2</sup> Q30 of MGZ31DRh or MGZ31J1DRh were more than 75%, the quality control standard.

<sup>3</sup> Mapping rate was the number of total clean reads divided by the number of mapped reads.

Table S12. The absolute and relative abundances of major taxons at different classification level in rhizobacteria based on genes number(SOAP).

| KINGDOM<br>#Taxonomy | Absolute abundance (gene number) |            | Relative abundance (%) |            |
|----------------------|----------------------------------|------------|------------------------|------------|
|                      | MGZ31DRh                         | MGZ31J1DRh | MGZ31DRh               | MGZ31J1DRh |
| <i>Bacteria</i>      | 30194                            | 32108      | 63.407                 | 60.933     |
| <i>Unknown</i>       | 10083                            | 12115      | 21.174                 | 22.991     |
| <i>Unclassified</i>  | 6841                             | 7657       | 14.366                 | 14.531     |
| <i>Archaea</i>       | 257                              | 552        | 0.540                  | 1.048      |
| <i>Viruses</i>       | 180                              | 193        | 0.378                  | 0.366      |
| <i>Fungi</i>         | 64                               | 69         | 0.134                  | 0.131      |
| SUM                  | 47619                            | 52694      | 100.000                | 100.000    |

| PHYLUM<br>#Taxonomy     | Absolute abundance(gene number) |            | Relative abundance (%) |             |
|-------------------------|---------------------------------|------------|------------------------|-------------|
|                         | MGZ31DRh                        | MGZ31J1DRh | MGZ31DRh               | MGZ31J1DRh  |
| <i>Proteobacteria</i>   | 18361                           | 19239      | 38.55813856            | 36.51079819 |
| <i>Unknown</i>          | 10083                           | 12115      | 21.17432117            | 22.9912324  |
| <i>Unclassified</i>     | 9316                            | 10451      | 19.56361956            | 19.83337761 |
| <i>Actinobacteria</i>   | 3609                            | 3828       | 7.578907579            | 7.264584203 |
| <i>Bacteroidetes</i>    | 2072                            | 2209       | 4.351204351            | 4.192128136 |
| <i>Gemmatimonadetes</i> | 1307                            | 1403       | 2.744702745            | 2.662542225 |
| <i>Acidobacteria</i>    | 952                             | 1065       | 1.999201999            | 2.021102972 |
| <i>Firmicutes</i>       | 608                             | 706        | 1.276801277            | 1.339810984 |
| <i>Cyanobacteria</i>    | 330                             | 357        | 0.693000693            | 0.677496489 |
| <i>Chloroflexi</i>      | 258                             | 290        | 0.541800542            | 0.550347288 |
| <i>Thaumarchaeota</i>   | 117                             | 336        | 0.245700246            | 0.637643755 |
| <i>Verrucomicrobia</i>  | 96                              | 105        | 0.201600202            | 0.199263673 |
| <i>Planctomycetes</i>   | 90                              | 100        | 0.189000189            | 0.189774927 |
| SUM                     | 47199                           | 52204      | 99.118                 | 99.070      |

| CLASS<br>#Taxonomy         | Absolute abundance (gene number) |            | Relative abundance (%) |             |
|----------------------------|----------------------------------|------------|------------------------|-------------|
|                            | MGZ31DRh                         | MGZ31J1DRh | MGZ31DRh               | MGZ31J1DRh  |
| <i>Unclassified</i>        | 11995                            | 13581      | 25.18952519            | 25.77333283 |
| <i>Alphaproteobacteria</i> | 10317                            | 10333      | 21.66572167            | 19.6094432  |
| <i>Unknown</i>             | 10083                            | 12115      | 21.17432117            | 22.9912324  |
| <i>Betaproteobacteria</i>  | 4831                             | 5325       | 10.14511015            | 10.10551486 |
| <i>Actinobacteria</i>      | 3459                             | 3652       | 7.263907264            | 6.930580332 |
| <i>Gammaproteobacteria</i> | 1760                             | 1962       | 3.696003696            | 3.723384066 |
| <i>Gemmatimonadetes</i>    | 1307                             | 1403       | 2.744702745            | 2.662542225 |
| <i>Acidobacteriia</i>      | 906                              | 1015       | 1.902601903            | 1.926215508 |
| <i>Sphingobacteriia</i>    | 879                              | 926        | 1.845901846            | 1.757315823 |
| <i>Deltaproteobacteria</i> | 307                              | 342        | 0.644700645            | 0.64903025  |
| <i>Bacilli</i>             | 289                              | 352        | 0.606900607            | 0.668007743 |
| <i>Ktedonobacteria</i>     | 197                              | 221        | 0.413700414            | 0.419402589 |
| <i>Clostridia</i>          | 161                              | 176        | 0.338100338            | 0.334003871 |
| <i>Bacteroidia</i>         | 150                              | 168        | 0.315000315            | 0.318821877 |
| <i>Cytophagia</i>          | 130                              | 140        | 0.273000273            | 0.265684898 |
| <i>Thermoleophilia</i>     | 119                              | 142        | 0.24990025             | 0.269480396 |
| <i>Planctomycetia</i>      | 90                               | 100        | 0.189000189            | 0.189774927 |
| <i>Flavobacteriia</i>      | 69                               | 78         | 0.144900145            | 0.148024443 |
| <i>Verrucomicrobiae</i>    | 50                               | 54         | 0.105000105            | 0.102478461 |
| <i>Halobacteria</i>        | 44                               | 49         | 0.092400092            | 0.092989714 |
| SUM                        | 47143                            | 52134      | 99.00039901            | 98.93726041 |

| ORDER | Order<br>#Taxonomy         | Absolute abundance (gene number) |            | Relative abundance (%) |             |
|-------|----------------------------|----------------------------------|------------|------------------------|-------------|
|       |                            | MGZ31DRh                         | MGZ31J1DRh | MGZ31DRh               | MGZ31J1DRh  |
|       | <i>Unclassified</i>        | 13897                            | 15468      | 29.18372918            | 29.3543857  |
|       | <i>Unknown</i>             | 10083                            | 12115      | 21.17432117            | 22.9912324  |
|       | <i>Rhizobiales</i>         | 7593                             | 7560       | 15.94531595            | 14.34698448 |
|       | <i>Burkholderiales</i>     | 4464                             | 4901       | 9.374409374            | 9.300869169 |
|       | <i>Sphingomonadales</i>    | 1969                             | 1962       | 4.134904135            | 3.723384066 |
|       | <i>Actinomycetales</i>     | 1190                             | 1241       | 2.499002499            | 2.355106843 |
|       | <i>Acidobacteriales</i>    | 906                              | 1015       | 1.902601903            | 1.926215508 |
|       | <i>Sphingobacteriales</i>  | 879                              | 926        | 1.845901846            | 1.757315823 |
|       | <i>Xanthomonadales</i>     | 632                              | 653        | 1.327201327            | 1.239230273 |
|       | <i>Propionibacteriales</i> | 602                              | 616        | 1.264201264            | 1.16901355  |
|       | <i>Pseudomonadales</i>     | 446                              | 508        | 0.936600937            | 0.964056629 |
|       | <i>Corynebacteriales</i>   | 385                              | 425        | 0.808500809            | 0.806543439 |
|       | <i>Streptomycetales</i>    | 353                              | 378        | 0.741300741            | 0.717349224 |
|       | <i>Bacillales</i>          | 237                              | 283        | 0.497700498            | 0.537063043 |
|       | <i>Pseudonocardiales</i>   | 204                              | 214        | 0.428400428            | 0.406118344 |
|       | <i>Enterobacteriales</i>   | 200                              | 230        | 0.42000042             | 0.436482332 |
|       | <i>Micrococcales</i>       | 199                              | 220        | 0.417900418            | 0.417504839 |
|       | <i>Ktedonobacterales</i>   | 197                              | 221        | 0.413700414            | 0.419402589 |
|       | <i>Caulobacterales</i>     | 175                              | 187        | 0.367500368            | 0.354879113 |
|       | <i>Caudovirales</i>        | 153                              | 166        | 0.321300321            | 0.315026379 |
|       | <i>Bacteroidales</i>       | 150                              | 168        | 0.315000315            | 0.318821877 |
|       | <i>Micromonosporales</i>   | 139                              | 147        | 0.291900292            | 0.278969143 |

| ORDER | Order<br>#Taxonomy         | Absolute abundance (gene number) |            | Relative abundance (%) |             |
|-------|----------------------------|----------------------------------|------------|------------------------|-------------|
|       |                            | MGZ31DRh                         | MGZ31J1DRh | MGZ31DRh               | MGZ31J1DRh  |
|       | <i>Clostridiales</i>       | 132                              | 144        | 0.277200277            | 0.273275895 |
|       | <i>Cytophagales</i>        | 130                              | 140        | 0.273000273            | 0.265684898 |
|       | <i>Solirubrobacterales</i> | 119                              | 142        | 0.24990025             | 0.269480396 |
|       | <i>Myxococcales</i>        | 117                              | 127        | 0.245700246            | 0.241014157 |
|       | <i>Frankiales</i>          | 111                              | 116        | 0.233100233            | 0.220138915 |
|       | <i>Rhodospirillales</i>    | 109                              | 123        | 0.228900229            | 0.23342316  |
|       | <i>Nitrosopumilales</i>    | 106                              | 302        | 0.222600223            | 0.573120279 |
|       | <i>Streptosporangiales</i> | 106                              | 112        | 0.222600223            | 0.212547918 |
|       | <i>Rhodobacterales</i>     | 101                              | 114        | 0.212100212            | 0.216343417 |
|       | <i>Rhodocyclales</i>       | 83                               | 102        | 0.174300174            | 0.193570425 |
|       | <i>Flavobacteriales</i>    | 64                               | 72         | 0.134400134            | 0.136637947 |
|       | <i>Planctomycetales</i>    | 64                               | 72         | 0.134400134            | 0.136637947 |
|       | <i>Oscillatoriales</i>     | 58                               | 60         | 0.121800122            | 0.113864956 |
|       | <i>Desulfobacterales</i>   | 55                               | 63         | 0.115500116            | 0.119558204 |
|       | <i>Verrucomicrobiales</i>  | 50                               | 54         | 0.105000105            | 0.102478461 |
|       | <i>Chroococcales</i>       | 49                               | 60         | 0.102900103            | 0.113864956 |
|       | <i>Alteromonadales</i>     | 44                               | 51         | 0.092400092            | 0.096785213 |
|       | <i>Stigonematales</i>      | 43                               | 43         | 0.09030009             | 0.081603219 |
|       | <i>Desulfuromonadales</i>  | 41                               | 47         | 0.086100086            | 0.089194216 |
|       | <i>Lactobacillales</i>     | 40                               | 52         | 0.084000084            | 0.098682962 |
|       | <i>Desulfovibrionales</i>  | 38                               | 40         | 0.07980008             | 0.075909971 |
|       | <i>Neisseriales</i>        | 38                               | 46         | 0.07980008             | 0.087296466 |

| ORDER      | Order<br>#Taxonomy         | Absolute abundance (gene number) |            | Relative abundance (%) |             |
|------------|----------------------------|----------------------------------|------------|------------------------|-------------|
|            |                            | MGZ31DRh                         | MGZ31J1DRh | MGZ31DRh               | MGZ31J1DRh  |
|            | <i>Chromatiales</i>        | 38                               | 40         | 0.07980008             | 0.075909971 |
|            | <i>Nostocales</i>          | 36                               | 37         | 0.075600076            | 0.070216723 |
|            | <i>Vibrionales</i>         | 36                               | 37         | 0.075600076            | 0.070216723 |
|            | <i>Selenomonadales</i>     | 35                               | 41         | 0.073500074            | 0.07780772  |
|            | <i>Chloroflexales</i>      | 34                               | 39         | 0.071400071            | 0.074012222 |
|            | <i>Thiotrichales</i>       | 33                               | 43         | 0.069300069            | 0.081603219 |
|            | <i>Rubrobacterales</i>     | 29                               | 31         | 0.060900061            | 0.058830227 |
|            | <i>Gloeobacterales</i>     | 27                               | 30         | 0.056700057            | 0.056932478 |
|            | <i>Nitrospirales</i>       | 24                               | 30         | 0.05040005             | 0.056932478 |
|            | <i>Sordariales</i>         | 23                               | 26         | 0.048300048            | 0.049341481 |
|            | <i>Geodermatophilales</i>  | 22                               | 24         | 0.046200046            | 0.045545982 |
|            | <i>Acidithiobacillales</i> | 22                               | 25         | 0.046200046            | 0.047443732 |
|            | <i>Solibacterales</i>      | 21                               | 22         | 0.044100044            | 0.041750484 |
|            | <i>Oceanospirillales</i>   | 21                               | 23         | 0.044100044            | 0.043648233 |
|            | <i>Methylococcales</i>     | 21                               | 30         | 0.044100044            | 0.056932478 |
| SUM(genes) | SUM                        | 47173                            | 52164      | 99.06339906            | 98.99419289 |



| FAMILY | Family                     | Absolute abundance (gene number) |            | Relative abundance (%) |             |
|--------|----------------------------|----------------------------------|------------|------------------------|-------------|
|        | #Taxonomy                  | MGZ31DRh                         | MGZ31J1DRh | MGZ31DRh               | MGZ31J1DRh  |
|        | <i>Unclassified</i>        | 16127                            | 17834      | 33.86673387            | 33.84446047 |
|        | <i>Unknown</i>             | 10083                            | 12115      | 21.17432117            | 22.9912324  |
|        | <i>Bradyrhizobiaceae</i>   | 6899                             | 6843       | 14.48791449            | 12.98629825 |
|        | <i>Burkholderiaceae</i>    | 3068                             | 3204       | 6.442806443            | 6.080388659 |
|        | <i>Sphingomonadaceae</i>   | 1817                             | 1813       | 3.815703816            | 3.440619425 |
|        | <i>Comamonadaceae</i>      | 920                              | 1139       | 1.932001932            | 2.161536418 |
|        | <i>Acidobacteriaceae</i>   | 906                              | 1015       | 1.902601903            | 1.926215508 |
|        | <i>Sphingobacteriaceae</i> | 778                              | 811        | 1.633801634            | 1.539074657 |
|        | <i>Xanthomonadaceae</i>    | 618                              | 638        | 1.297801298            | 1.210764034 |
|        | <i>Nocardioideae</i>       | 587                              | 600        | 1.232701233            | 1.138649562 |
|        | <i>Pseudomonadaceae</i>    | 393                              | 449        | 0.825300825            | 0.852089422 |
|        | <i>Streptomycetaceae</i>   | 353                              | 378        | 0.741300741            | 0.717349224 |
|        | <i>Rhizobiaceae</i>        | 236                              | 250        | 0.495600496            | 0.474437317 |
|        | <i>Pseudonocardiaceae</i>  | 204                              | 214        | 0.428400428            | 0.406118344 |
|        | <i>Enterobacteriaceae</i>  | 200                              | 230        | 0.42000042             | 0.436482332 |
|        | <i>Ktedonobacteraceae</i>  | 197                              | 221        | 0.413700414            | 0.419402589 |
|        | <i>Caulobacteraceae</i>    | 175                              | 187        | 0.367500368            | 0.354879113 |
|        | <i>Mycobacteriaceae</i>    | 144                              | 156        | 0.302400302            | 0.296048886 |
|        | <i>Micromonosporaceae</i>  | 139                              | 147        | 0.291900292            | 0.278969143 |
|        | <i>Nocardiaceae</i>        | 116                              | 128        | 0.243600244            | 0.242911906 |
|        | <i>Patulibacteraceae</i>   | 115                              | 138        | 0.241500242            | 0.261889399 |
|        | <i>Oxalobacteraceae</i>    | 113                              | 132        | 0.237300237            | 0.250502904 |
|        | <i>Cytophagaceae</i>       | 111                              | 117        | 0.233100233            | 0.222036665 |
|        | <i>Phyllobacteriaceae</i>  | 111                              | 108        | 0.233100233            | 0.204956921 |
|        | <i>Nitrosopumilaceae</i>   | 106                              | 302        | 0.222600223            | 0.573120279 |
|        | <i>Rhodobacteraceae</i>    | 92                               | 104        | 0.193200193            | 0.197365924 |
|        | <i>Rhodocyclaceae</i>      | 83                               | 102        | 0.174300174            | 0.193570425 |
|        | <i>Paenibacillaceae</i>    | 79                               | 89         | 0.165900166            | 0.168899685 |

| FAMILY | Family<br>#Taxonomy                  | Absolute abundance (gene number) |            |  | Relative abundance (%) |             |
|--------|--------------------------------------|----------------------------------|------------|--|------------------------|-------------|
|        |                                      | MGZ31DRh                         | MGZ31J1DRh |  | MGZ31DRh               | MGZ31J1DRh  |
|        | <i>Bacillaceae</i>                   | 77                               | 95         |  | 0.161700162            | 0.180286181 |
|        | <i>Frankiaceae</i>                   | 76                               | 80         |  | 0.15960016             | 0.151819942 |
|        | <i>Methylobacteriaceae</i>           | 75                               | 77         |  | 0.157500158            | 0.146126694 |
|        | <i>Microbacteriaceae</i>             | 73                               | 81         |  | 0.153300153            | 0.153717691 |
|        | <i>Siphoviridae</i>                  | 73                               | 77         |  | 0.153300153            | 0.146126694 |
|        | <i>Chitinophagaceae</i>              | 65                               | 76         |  | 0.136500137            | 0.144228944 |
|        | <i>Planctomycetaceae</i>             | 64                               | 72         |  | 0.134400134            | 0.136637947 |
|        | <i>Cystobacteraceae</i>              | 60                               | 64         |  | 0.126000126            | 0.121455953 |
|        | <i>Flavobacteriaceae</i>             | 59                               | 66         |  | 0.123900124            | 0.125251452 |
|        | <i>Alcaligenaceae</i>                | 59                               | 70         |  | 0.123900124            | 0.132842449 |
|        | <i>Bacteroidaceae</i>                | 58                               | 65         |  | 0.121800122            | 0.123353703 |
|        | <i>Desulfobacteraceae</i>            | 55                               | 63         |  | 0.115500116            | 0.119558204 |
|        | <i>Brucellaceae</i>                  | 55                               | 57         |  | 0.115500116            | 0.108171708 |
|        | <i>Acetobacteraceae</i>              | 53                               | 57         |  | 0.111300111            | 0.108171708 |
|        | <i>Rhodospirillaceae</i>             | 52                               | 62         |  | 0.109200109            | 0.117660455 |
|        | <i>Myoviridae</i>                    | 46                               | 53         |  | 0.096600097            | 0.100580711 |
|        | <i>Nocardiopsaceae</i>               | 43                               | 45         |  | 0.09030009             | 0.085398717 |
|        | <i>Clostridiaceae</i>                | 38                               | 42         |  | 0.07980008             | 0.079705469 |
|        | <i>Intrasporangiaceae</i>            | 37                               | 40         |  | 0.077700078            | 0.075909971 |
|        | <i>Vibrionaceae</i>                  | 36                               | 37         |  | 0.075600076            | 0.070216723 |
|        | <i>Geobacteraceae</i>                | 36                               | 39         |  | 0.075600076            | 0.074012222 |
|        | <i>Leptospiraceae</i>                | 35                               | 40         |  | 0.073500074            | 0.075909971 |
|        | <i>Desulfovibrionaceae</i>           | 34                               | 36         |  | 0.071400071            | 0.068318974 |
|        | <i>Gordoniaceae</i>                  | 33                               | 38         |  | 0.069300069            | 0.072114472 |
|        | <i>Micrococcaceae</i>                | 33                               | 42         |  | 0.069300069            | 0.079705469 |
|        | <i>Verrucomicrobia subdivision 3</i> | 32                               | 37         |  | 0.067200067            | 0.070216723 |
|        | <i>Veillonellaceae</i>               | 31                               | 37         |  | 0.065100065            | 0.070216723 |
|        | <i>Moraxellaceae</i>                 | 31                               | 37         |  | 0.065100065            | 0.070216723 |
|        | <i>Thiotrichaceae</i>                | 31                               | 39         |  | 0.065100065            | 0.074012222 |

| FAMILY | Family<br>#Taxonomy            | Absolute abundance (gene number) |            | Relative abundance (%) |             |
|--------|--------------------------------|----------------------------------|------------|------------------------|-------------|
|        |                                | MGZ31DRh                         | MGZ31J1DRh | MGZ31DRh               | MGZ31J1DRh  |
|        | <i>Streptosporangiaceae</i>    | 30                               | 34         | 0.063000063            | 0.064523475 |
|        | <i>Rubrobacteraceae</i>        | 29                               | 31         | 0.060900061            | 0.058830227 |
|        | <i>Porphyromonadaceae</i>      | 27                               | 32         | 0.056700057            | 0.060727977 |
|        | <i>Polyangiaceae</i>           | 27                               | 32         | 0.056700057            | 0.060727977 |
|        | <i>Neisseriaceae</i>           | 26                               | 30         | 0.054600055            | 0.056932478 |
|        | <i>Marinilabiliaceae</i>       | 25                               | 31         | 0.052500053            | 0.058830227 |
|        | <i>Peptococcaceae</i>          | 24                               | 26         | 0.05040005             | 0.049341481 |
|        | <i>Nitrospiraceae</i>          | 24                               | 30         | 0.05040005             | 0.056932478 |
|        | <i>Ectothiorhodospiraceae</i>  | 23                               | 23         | 0.048300048            | 0.043648233 |
|        | <i>Thermomonosporaceae</i>     | 23                               | 23         | 0.048300048            | 0.043648233 |
|        | <i>Sordariaceae</i>            | 22                               | 25         | 0.046200046            | 0.047443732 |
|        | <i>Acidithiobacillaceae</i>    | 22                               | 25         | 0.046200046            | 0.047443732 |
|        | <i>Geodermatophilaceae</i>     | 22                               | 24         | 0.046200046            | 0.045545982 |
|        | <i>Pseudoalteromonadaceae</i>  | 21                               | 20         | 0.044100044            | 0.037954985 |
|        | <i>Solibacteraceae</i>         | 21                               | 22         | 0.044100044            | 0.041750484 |
|        | <i>Candidatus Brocadiaceae</i> | 21                               | 23         | 0.044100044            | 0.043648233 |
|        | <i>Chloroflexaceae</i>         | 21                               | 24         | 0.044100044            | 0.045545982 |
|        | <i>Corynebacteriaceae</i>      | 20                               | 23         | 0.042000042            | 0.043648233 |
|        | <i>Halobacteriaceae</i>        | 19                               | 21         | 0.03990004             | 0.039852735 |
|        | <i>Nostocaceae</i>             | 19                               | 20         | 0.03990004             | 0.037954985 |
|        | <i>Methylococcaceae</i>        | 19                               | 17         | 0.03990004             | 0.032261738 |
|        | <i>Thermaceae</i>              | 18                               | 22         | 0.037800038            | 0.041750484 |
|        | <i>Erythrobacteraceae</i>      | 18                               | 18         | 0.037800038            | 0.034159487 |
|        | <i>Podoviridae</i>             | 18                               | 21         | 0.037800038            | 0.039852735 |
|        | <i>Deinococcaceae</i>          | 17                               | 21         | 0.035700036            | 0.039852735 |
|        | <i>Methylocystaceae</i>        | 17                               | 16         | 0.035700036            | 0.030363988 |
|        | <i>Aquificaceae</i>            | 17                               | 21         | 0.035700036            | 0.039852735 |
|        | <i>Listeriaceae</i>            | 16                               | 21         | 0.033600034            | 0.039852735 |
|        | <i>Sporichthyaceae</i>         | 16                               | 16         | 0.033600034            | 0.030363988 |

| FAMILY     | Family<br>#Taxonomy              | Absolute abundance (gene number) |            | Relative abundance (%) |             |
|------------|----------------------------------|----------------------------------|------------|------------------------|-------------|
|            |                                  | MGZ31DRh                         | MGZ31J1DRh | MGZ31DRh               | MGZ31J1DRh  |
|            | <i>Alteromonadaceae</i>          | 15                               | 21         | 0.031500032            | 0.039852735 |
|            | <i>Methylophilaceae</i>          | 15                               | 16         | 0.031500032            | 0.030363988 |
|            | <i>Lachnospiraceae</i>           | 15                               | 15         | 0.031500032            | 0.028466239 |
|            | <i>Chromatiaceae</i>             | 15                               | 17         | 0.031500032            | 0.032261738 |
|            | <i>Prevotellaceae</i>            | 15                               | 16         | 0.031500032            | 0.030363988 |
|            | <i>Nitrospinaceae</i>            | 15                               | 15         | 0.031500032            | 0.028466239 |
|            | <i>Actinomycetaceae</i>          | 14                               | 17         | 0.029400029            | 0.032261738 |
|            | <i>Propionibacteriaceae</i>      | 14                               | 15         | 0.029400029            | 0.028466239 |
|            | <i>Streptococcaceae</i>          | 14                               | 17         | 0.029400029            | 0.032261738 |
|            | <i>Pasteurellaceae</i>           | 14                               | 19         | 0.029400029            | 0.036057236 |
|            | <i>Hydrogenophilaceae</i>        | 14                               | 16         | 0.029400029            | 0.030363988 |
|            | <i>Cryptosporangiaceae</i>       | 14                               | 15         | 0.029400029            | 0.028466239 |
|            | <i>Natrialbaceae</i>             | 14                               | 15         | 0.029400029            | 0.028466239 |
|            | <i>Thermoanaerobacteraceae</i>   | 14                               | 17         | 0.029400029            | 0.032261738 |
|            | <i>Gemmatimonadaceae</i>         | 13                               | 14         | 0.027300027            | 0.02656849  |
|            | <i>Sinobacteraceae</i>           | 13                               | 14         | 0.027300027            | 0.02656849  |
|            | <i>Thermodesulfobacteriaceae</i> | 12                               | 13         | 0.025200025            | 0.024670741 |
|            | <i>Chromobacteriaceae</i>        | 12                               | 16         | 0.025200025            | 0.030363988 |
|            | <i>Hyphomicrobiaceae</i>         | 12                               |            | 0.025200025            |             |
|            | <i>Rhodothermaceae</i>           | 11                               |            | 0.023100023            |             |
|            | <i>Haloferacaceae</i>            | 11                               | 13         | 0.023100023            | 0.024670741 |
|            | <i>Cellulomonadaceae</i>         | 11                               |            | 0.023100023            |             |
|            | <i>Lactobacillaceae</i>          |                                  | 13         |                        | 0.024670741 |
|            | <i>Nitrosomonadaceae</i>         |                                  | 14         |                        | 0.02656849  |
|            | <i>Thermodesulfobacteriaceae</i> |                                  | 13         |                        | 0.024670741 |
|            | <i>Halomonadaceae</i>            |                                  | 13         |                        | 0.024670741 |
| SUM(genes) | SUM                              | 47139                            | 52134      | 98.991999              | 98.93726042 |

| GENUS<br>#Taxonomy      | Absolute abundance (gene number) |            | Relative abundance (%) |             |
|-------------------------|----------------------------------|------------|------------------------|-------------|
|                         | MGZ31DRh                         | MGZ31J1DRh | MGZ31DRh               | MGZ31J1DRh  |
| <i>Unclassified</i>     | 18777                            | 20784      | 39.43173943            | 39.44282081 |
| <i>Unknown</i>          | 10083                            | 12115      | 21.17432117            | 22.9912324  |
| <i>Bradyrhizobium</i>   | 6645                             | 6586       | 13.95451395            | 12.49857669 |
| <i>Ralstonia</i>        | 2256                             | 2298       | 4.737604738            | 4.361027821 |
| <i>Burkholderia</i>     | 642                              | 714        | 1.348201348            | 1.354992978 |
| <i>Sphingomonas</i>     | 502                              | 516        | 1.054201054            | 0.979238623 |
| <i>Mucilaginibacter</i> | 467                              | 483        | 0.980700981            | 0.916612897 |
| <i>Aeromicrobium</i>    | 423                              | 427        | 0.888300888            | 0.810338938 |
| <i>Pseudomonas</i>      | 392                              | 448        | 0.823200823            | 0.850191673 |
| <i>Novosphingobium</i>  | 377                              | 365        | 0.791700792            | 0.692678483 |
| <i>Streptomyces</i>     | 343                              | 367        | 0.72030072             | 0.696473982 |
| <i>Variovorax</i>       | 326                              | 354        | 0.684600685            | 0.671803241 |
| <i>Rudaea</i>           | 312                              | 323        | 0.655200655            | 0.612973014 |
| <i>Ktedonobacter</i>    | 197                              | 221        | 0.413700414            | 0.419402589 |
| <i>Pedobacter</i>       | 180                              | 193        | 0.378000378            | 0.366265609 |
| <i>Sphingobium</i>      | 143                              | 148        | 0.3003003              | 0.280866892 |

| GENUS<br>#Taxonomy           | Absolute abundance (gene number) |            |  | Relative abundance (%) |             |
|------------------------------|----------------------------------|------------|--|------------------------|-------------|
|                              | MGZ31DRh                         | MGZ31J1DRh |  | MGZ31DRh               | MGZ31J1DRh  |
| <i>Mycobacterium</i>         | 143                              | 156        |  | 0.3003003              | 0.296048886 |
| <i>Caulobacter</i>           | 123                              | 130        |  | 0.258300258            | 0.246707405 |
| <i>Xanthomonas</i>           | 117                              | 123        |  | 0.245700246            | 0.23342316  |
| <i>Patulibacter</i>          | 115                              | 138        |  | 0.241500242            | 0.261889399 |
| <i>Rhizobium</i>             | 108                              | 119        |  | 0.226800227            | 0.225832163 |
| <i>Candidatus Koribacter</i> | 106                              | 118        |  | 0.222600223            | 0.223934414 |
| <i>Rhodococcus</i>           | 83                               | 94         |  | 0.174300174            | 0.178388431 |
| <i>Mesorhizobium</i>         | 80                               | 81         |  | 0.168000168            | 0.153717691 |
| <i>Cupriavidus</i>           | 77                               | 85         |  | 0.161700162            | 0.161308688 |
| <i>Frankia</i>               | 76                               | 80         |  | 0.15960016             | 0.151819942 |
| <i>Acidovorax</i>            | 75                               | 110        |  | 0.157500158            | 0.20875242  |
| <i>Polaromonas</i>           | 73                               | 99         |  | 0.153300153            | 0.187877178 |
| <i>Amycolatopsis</i>         | 68                               | 69         |  | 0.142800143            | 0.1309447   |
| <i>Sinorhizobium</i>         | 59                               | 58         |  | 0.123900124            | 0.110069458 |
| <i>Bacteroides</i>           | 58                               | 65         |  | 0.121800122            | 0.123353703 |
| <i>Rhodopseudomonas</i>      | 51                               | 50         |  | 0.107100107            | 0.094887463 |

| GENUS<br>#Taxonomy      | Absolute abundance (gene number) |            |  | Relative abundance (%) |             |
|-------------------------|----------------------------------|------------|--|------------------------|-------------|
|                         | MGZ31DRh                         | MGZ31J1DRh |  | MGZ31DRh               | MGZ31J1DRh  |
| <i>Methylobacterium</i> | 51                               | 51         |  | 0.107100107            | 0.096785213 |
| <i>Bacillus</i>         | 49                               | 63         |  | 0.102900103            | 0.119558204 |
| <i>Terriglobus</i>      | 43                               | 45         |  | 0.09030009             | 0.085398717 |
| <i>Nocardiopsis</i>     | 40                               | 42         |  | 0.084000084            | 0.079705469 |
| <i>Paenibacillus</i>    | 40                               | 46         |  | 0.084000084            | 0.087296466 |
| <i>Afipia</i>           | 39                               | 38         |  | 0.081900082            | 0.072114472 |
| <i>Nocardioides</i>     | 39                               | 41         |  | 0.081900082            | 0.07780772  |
| <i>Rhodanobacter</i>    | 39                               | 41         |  | 0.081900082            | 0.07780772  |
| <i>Cystobacter</i>      | 39                               | 42         |  | 0.081900082            | 0.079705469 |
| <i>Brucella</i>         | 36                               | 38         |  | 0.075600076            | 0.072114472 |
| <i>Escherichia</i>      | 35                               | 44         |  | 0.073500074            | 0.083500968 |
| <i>Leptospira</i>       | 35                               | 39         |  | 0.073500074            | 0.074012222 |
| <i>Curvibacter</i>      | 34                               | 45         |  | 0.071400071            | 0.085398717 |
| <i>Dyella</i>           | 34                               | 33         |  | 0.071400071            | 0.062625726 |
| <i>Gordonia</i>         | 33                               | 38         |  | 0.069300069            | 0.072114472 |
| <i>Pedosphaera</i>      | 32                               | 37         |  | 0.067200067            | 0.070216723 |

| GENUS<br>#Taxonomy    | Absolute abundance (gene number) |            |  | Relative abundance (%) |             |
|-----------------------|----------------------------------|------------|--|------------------------|-------------|
|                       | MGZ31DRh                         | MGZ31J1DRh |  | MGZ31DRh               | MGZ31J1DRh  |
| <i>Thauera</i>        | 32                               | 36         |  | 0.067200067            | 0.068318974 |
| <i>Desulfovibrio</i>  | 32                               | 32         |  | 0.067200067            | 0.060727977 |
| <i>Agrobacterium</i>  | 31                               | 34         |  | 0.065100065            | 0.064523475 |
| <i>Acinetobacter</i>  | 31                               | 36         |  | 0.065100065            | 0.068318974 |
| <i>Kutzneria</i>      | 31                               | 34         |  | 0.065100065            | 0.064523475 |
| <i>Clostridium</i>    | 29                               | 33         |  | 0.060900061            | 0.062625726 |
| <i>Herbaspirillum</i> | 29                               | 36         |  | 0.060900061            | 0.068318974 |
| <i>Smaragdicoccus</i> | 29                               | 29         |  | 0.060900061            | 0.055034729 |
| <i>Vibrio</i>         | 29                               | 30         |  | 0.060900061            | 0.056932478 |
| <i>Rubrobacter</i>    | 29                               | 31         |  | 0.060900061            | 0.058830227 |
| <i>Actinoplanes</i>   | 28                               | 31         |  | 0.058800059            | 0.058830227 |
| <i>Gloeobacter</i>    | 27                               | 30         |  | 0.056700057            | 0.056932478 |
| <i>Segetibacter</i>   | 27                               | 30         |  | 0.056700057            | 0.056932478 |
| <i>Bordetella</i>     | 27                               | 28         |  | 0.056700057            | 0.05313698  |
| <i>Kribbella</i>      | 26                               | 28         |  | 0.054600055            | 0.05313698  |
| <i>Brevibacillus</i>  | 26                               | 29         |  | 0.054600055            | 0.055034729 |



| GENUS<br>#Taxonomy                | Absolute abundance (gene number) |            |  | Relative abundance (%) |             |
|-----------------------------------|----------------------------------|------------|--|------------------------|-------------|
|                                   | MGZ31DRh                         | MGZ31J1DRh |  | MGZ31DRh               | MGZ31J1DRh  |
| <i>Arthrobacter</i>               | 26                               | 33         |  | 0.054600055            | 0.062625726 |
| <i>Micromonospora</i>             | 26                               | 26         |  | 0.054600055            | 0.049341481 |
| <i>Salinispora</i>                | 26                               | 30         |  | 0.054600055            | 0.056932478 |
| <i>Candidatus Magnetoglobus</i>   | 25                               | 33         |  | 0.052500053            | 0.062625726 |
| <i>Chondromyces</i>               | 25                               | 27         |  | 0.052500053            | 0.05123923  |
| <i>Geobacter</i>                  | 25                               | 28         |  | 0.052500053            | 0.05313698  |
| <i>Candidatus Nitrosoarchaeum</i> | 25                               | 83         |  | 0.052500053            | 0.157513189 |
| <i>Flavobacterium</i>             | 24                               | 28         |  | 0.05040005             | 0.05313698  |
| <i>Janthinobacterium</i>          | 24                               | 29         |  | 0.05040005             | 0.055034729 |
| <i>Microvirga</i>                 | 24                               | 26         |  | 0.05040005             | 0.049341481 |
| <i>Hydrogenophaga</i>             | 24                               | 28         |  | 0.05040005             | 0.05313698  |
| <i>Caldithrix</i>                 | 24                               | 25         |  | 0.05040005             | 0.047443732 |
| <i>Actinomadura</i>               | 23                               | 23         |  | 0.048300048            | 0.043648233 |
| <i>Beggiatoa</i>                  | 23                               | 29         |  | 0.048300048            | 0.055034729 |
| <i>Salmonella</i>                 | 23                               | 31         |  | 0.048300048            | 0.058830227 |
| <i>Pontibacter</i>                | 22                               | 22         |  | 0.046200046            | 0.041750484 |

| GENUS<br>#Taxonomy           | Absolute abundance (gene number) |            |  | Relative abundance (%) |             |
|------------------------------|----------------------------------|------------|--|------------------------|-------------|
|                              | MGZ31DRh                         | MGZ31J1DRh |  | MGZ31DRh               | MGZ31J1DRh  |
| <i>Verminephrobacter</i>     | 22                               | 30         |  | 0.046200046            | 0.056932478 |
| <i>Acidithiobacillus</i>     | 22                               | 25         |  | 0.046200046            | 0.047443732 |
| <i>Yersinia</i>              | 22                               | 24         |  | 0.046200046            | 0.045545982 |
| <i>Rubellimicrobium</i>      | 22                               | 21         |  | 0.046200046            | 0.039852735 |
| <i>Sordaria</i>              | 22                               | 25         |  | 0.046200046            | 0.047443732 |
| <i>Niabella</i>              | 22                               | 31         |  | 0.046200046            | 0.058830227 |
| <i>Granulicella</i>          | 22                               | 24         |  | 0.046200046            | 0.045545982 |
| <i>Chloroflexus</i>          | 21                               | 24         |  | 0.044100044            | 0.045545982 |
| <i>Fischerella</i>           | 21                               | 19         |  | 0.044100044            | 0.036057236 |
| <i>Pseudoalteromonas</i>     | 21                               | 20         |  | 0.044100044            | 0.037954985 |
| <i>Intrasporangium</i>       | 21                               | 22         |  | 0.044100044            | 0.041750484 |
| <i>Ideonella</i>             | 21                               | 27         |  | 0.044100044            | 0.05123923  |
| <i>Candidatus Solibacter</i> | 21                               | 22         |  | 0.044100044            | 0.041750484 |
| <i>Methyloversatilis</i>     | 20                               | 20         |  | 0.042000042            | 0.037954985 |
| <i>Stigmatella</i>           | 20                               | 21         |  | 0.042000042            | 0.039852735 |
| <i>Microbacterium</i>        | 20                               | 21         |  | 0.042000042            | 0.039852735 |

| GENUS<br>#Taxonomy      | Absolute abundance (gene number) |            |  | Relative abundance (%) |             |
|-------------------------|----------------------------------|------------|--|------------------------|-------------|
|                         | MGZ31DRh                         | MGZ31J1DRh |  | MGZ31DRh               | MGZ31J1DRh  |
| <i>Neisseria</i>        | 20                               | 22         |  | 0.042000042            | 0.041750484 |
| <i>Saccharicrinis</i>   | 20                               | 25         |  | 0.042000042            | 0.047443732 |
| <i>Nitrobacter</i>      | 20                               | 19         |  | 0.042000042            | 0.036057236 |
| <i>Microbispora</i>     | 19                               | 22         |  | 0.03990004             | 0.041750484 |
| <i>Crocospaera</i>      | 19                               | 22         |  | 0.03990004             | 0.041750484 |
| <i>Comamonas</i>        | 18                               | 21         |  | 0.037800038            | 0.039852735 |
| <i>Sphingobacterium</i> | 18                               | 18         |  | 0.037800038            | 0.034159487 |
| <i>Stenotrophomonas</i> | 18                               | 16         |  | 0.037800038            | 0.030363988 |
| <i>Erythrobacter</i>    | 18                               | 18         |  | 0.037800038            | 0.034159487 |
| <i>Spirosoma</i>        | 17                               | 19         |  | 0.035700036            | 0.036057236 |
| <i>Deinococcus</i>      | 17                               | 21         |  | 0.035700036            | 0.039852735 |
| <i>Massilia</i>         | 17                               | 18         |  | 0.035700036            | 0.034159487 |
| <i>Azospirillum</i>     | 17                               | 23         |  | 0.035700036            | 0.043648233 |
| <i>Achromobacter</i>    | 17                               | 23         |  | 0.035700036            | 0.043648233 |
| <i>Ochrobactrum</i>     | 16                               | 16         |  | 0.033600034            | 0.030363988 |
| <i>Sporichthya</i>      | 16                               | 16         |  | 0.033600034            | 0.030363988 |

| GENUS<br>#Taxonomy         | Absolute abundance (gene number) |            |  | Relative abundance (%) |             |
|----------------------------|----------------------------------|------------|--|------------------------|-------------|
|                            | MGZ31DRh                         | MGZ31J1DRh |  | MGZ31DRh               | MGZ31J1DRh  |
| <i>Listeria</i>            | 16                               | 16         |  | 0.033600034            | 0.030363988 |
| <i>Blastococcus</i>        | 15                               | 16         |  | 0.031500032            | 0.030363988 |
| <i>Corynebacterium</i>     | 15                               | 16         |  | 0.031500032            | 0.030363988 |
| <i>Thioalkalivibrio</i>    | 15                               | 16         |  | 0.031500032            | 0.030363988 |
| <i>Chloracidobacterium</i> | 15                               | 16         |  | 0.031500032            | 0.030363988 |
| <i>Nitrospina</i>          | 15                               | 15         |  | 0.031500032            | 0.028466239 |
| <i>Saccharomonospora</i>   | 15                               | 15         |  | 0.031500032            | 0.028466239 |
| <i>Gemmata</i>             | 15                               | 17         |  | 0.031500032            | 0.032261738 |
| <i>Actinokineospora</i>    | 15                               | 15         |  | 0.031500032            | 0.028466239 |
| <i>Brevundimonas</i>       | 14                               | 18         |  | 0.029400029            | 0.034159487 |
| <i>Cryptosporangium</i>    | 14                               | 15         |  | 0.029400029            | 0.028466239 |
| <i>Acidobacterium</i>      | 14                               | 18         |  | 0.029400029            | 0.034159487 |
| <i>Parabacteroides</i>     | 14                               | 16         |  | 0.029400029            | 0.030363988 |
| <i>Nitrosopumilus</i>      | 13                               | 49         |  | 0.027300027            | 0.092989714 |
| <i>Thiobacillus</i>        | 13                               | 15         |  | 0.027300027            | 0.028466239 |
| <i>Prevotella</i>          | 13                               | 14         |  | 0.027300027            | 0.02656849  |

| GENUS<br>#Taxonomy         | Absolute abundance (gene number) |            |  | Relative abundance (%) |             |
|----------------------------|----------------------------------|------------|--|------------------------|-------------|
|                            | MGZ31DRh                         | MGZ31J1DRh |  | MGZ31DRh               | MGZ31J1DRh  |
| <i>Candidatus Kuenenia</i> | 13                               | 14         |  | 0.027300027            | 0.02656849  |
| <i>Gemmatimonas</i>        | 13                               | 14         |  | 0.027300027            | 0.02656849  |
| <i>Thermus</i>             | 13                               | 16         |  | 0.027300027            | 0.030363988 |
| <i>Curtobacterium</i>      | 13                               | 15         |  | 0.027300027            | 0.028466239 |
| <i>Azoarcus</i>            | 13                               | 15         |  | 0.027300027            | 0.028466239 |
| <i>Actinopolymorpha</i>    | 13                               | 15         |  | 0.027300027            | 0.028466239 |
| <i>Citromicrobium</i>      | 12                               | 13         |  | 0.025200025            | 0.024670741 |
| <i>Pseudonocardia</i>      | 12                               | 12         |  | 0.025200025            | 0.022772991 |
| <i>Nitratireductor</i>     | 12                               | 11         |  | 0.025200025            | 0.020875242 |
| <i>Leifsonia</i>           | 12                               | 14         |  | 0.025200025            | 0.02656849  |
| <i>Dyadobacter</i>         | 12                               | 12         |  | 0.025200025            | 0.022772991 |
| <i>Catelliglobospora</i>   | 12                               | 13         |  | 0.025200025            | 0.024670741 |
| <i>Streptococcus</i>       | 12                               | 15         |  | 0.025200025            | 0.028466239 |
| <i>Chthoniobacter</i>      | 12                               | 16         |  | 0.025200025            | 0.030363988 |
| <i>Desulfococcus</i>       | 11                               | 11         |  | 0.023100023            | 0.020875242 |
| <i>Ramlibacter</i>         | 11                               | 17         |  | 0.023100023            | 0.032261738 |

| GENUS<br>#Taxonomy        | Absolute abundance (gene number) |            |  | Relative abundance (%) |             |
|---------------------------|----------------------------------|------------|--|------------------------|-------------|
|                           | MGZ31DRh                         | MGZ31J1DRh |  | MGZ31DRh               | MGZ31J1DRh  |
| <i>Propionibacterium</i>  | 11                               | 12         |  | 0.023100023            | 0.022772991 |
| <i>Actinomyces</i>        | 11                               | 13         |  | 0.023100023            | 0.024670741 |
| <i>Limnohabitans</i>      | 11                               | 14         |  | 0.023100023            | 0.02656849  |
| <i>Longispora</i>         | 11                               | 10         |  | 0.023100023            | 0.018977493 |
| <i>Chlorogloeopsis</i>    | 11                               | 12         |  | 0.023100023            | 0.022772991 |
| <i>Hymenobacter</i>       | 11                               | 12         |  | 0.023100023            | 0.022772991 |
| <i>Zavarzinella</i>       | 10                               | 12         |  | 0.021000021            | 0.022772991 |
| <i>Rubrivivax</i>         | 10                               | 12         |  | 0.021000021            | 0.022772991 |
| <i>Thermodesulfatator</i> | 10                               | 11         |  | 0.021000021            | 0.020875242 |
| <i>Kaistia</i>            | 10                               | 9          |  | 0.021000021            | 0.017079743 |
| <i>Hydrogenivirga</i>     | 10                               | 13         |  | 0.021000021            | 0.024670741 |
| <i>Desulfosporosinus</i>  | 10                               | 12         |  | 0.021000021            | 0.022772991 |
| <i>Oscillatoria</i>       | 10                               | 10         |  | 0.021000021            | 0.018977493 |
| <i>Methylocystis</i>      | 10                               | 9          |  | 0.021000021            | 0.017079743 |
| <i>Delftia</i>            | 10                               | 12         |  | 0.021000021            | 0.022772991 |
| <i>Oscillochloris</i>     | 10                               | 12         |  | 0.021000021            | 0.022772991 |

| GENUS<br>#Taxonomy      | Absolute abundance (gene number) |            |  | Relative abundance (%) |             |
|-------------------------|----------------------------------|------------|--|------------------------|-------------|
|                         | MGZ31DRh                         | MGZ31J1DRh |  | MGZ31DRh               | MGZ31J1DRh  |
| <i>Nitrosospira</i>     | 10                               | 12         |  | 0.021000021            | 0.022772991 |
| <i>Acidiphilium</i>     | 9                                | 9          |  | 0.018900019            | 0.017079743 |
| <i>Janibacter</i>       | 9                                | 11         |  | 0.018900019            | 0.020875242 |
| <i>Nonomuraea</i>       | 9                                | 10         |  | 0.018900019            | 0.018977493 |
| <i>Hylemonella</i>      | 9                                | 9          |  | 0.018900019            | 0.017079743 |
| <i>Moorella</i>         | 9                                | 9          |  | 0.018900019            | 0.017079743 |
| <i>Geobacillus</i>      | 9                                | 11         |  | 0.018900019            | 0.020875242 |
| <i>Verrucomicrobium</i> | 9                                | 8          |  | 0.018900019            | 0.015181994 |
| <i>T4likevirus</i>      | 9                                | 9          |  | 0.018900019            | 0.017079743 |
| <i>Oceanicola</i>       | 9                                | 8          |  | 0.018900019            | 0.015181994 |
| <i>Bcep78likevirus</i>  | 9                                | 15         |  | 0.018900019            | 0.028466239 |
| <i>Singulisphaera</i>   | 9                                | 10         |  | 0.018900019            | 0.018977493 |
| <i>Scytonema</i>        | 9                                | 9          |  | 0.018900019            | 0.017079743 |
| <i>Ruegeria</i>         | 9                                | 13         |  | 0.018900019            | 0.024670741 |
| <i>Bartonella</i>       | 9                                | 9          |  | 0.018900019            | 0.017079743 |
| <i>Rhodomicrobium</i>   | 9                                | 8          |  | 0.018900019            | 0.015181994 |

| GENUS<br>#Taxonomy       | Absolute abundance (gene number) |            |  | Relative abundance (%) |             |
|--------------------------|----------------------------------|------------|--|------------------------|-------------|
|                          | MGZ31DRh                         | MGZ31J1DRh |  | MGZ31DRh               | MGZ31J1DRh  |
| <i>Actinotalea</i>       | 9                                | 11         |  | 0.018900019            | 0.020875242 |
| <i>Lactobacillus</i>     | 9                                | 13         |  | 0.018900019            | 0.024670741 |
| <i>Geopsychrobacter</i>  | 9                                | 9          |  | 0.018900019            | 0.017079743 |
| <i>Nitrospira</i>        | 8                                | 9          |  | 0.016800017            | 0.017079743 |
| <i>Solimonas</i>         | 8                                | 10         |  | 0.016800017            | 0.018977493 |
| <i>Saccharopolyspora</i> | 8                                | 11         |  | 0.016800017            | 0.020875242 |
| <i>Gracilimonas</i>      | 8                                | 7          |  | 0.016800017            | 0.013284245 |
| <i>Fibrisoma</i>         | 8                                | 8          |  | 0.016800017            | 0.015181994 |
| <i>Rhodobacter</i>       | 8                                | 8          |  | 0.016800017            | 0.015181994 |
| <i>Wolbachia</i>         | 8                                | 4          |  | 0.016800017            | 0.007590997 |
| <i>Klebsiella</i>        | 8                                | 6          |  | 0.016800017            | 0.011386496 |
| <i>Leptospirillum</i>    | 8                                | 11         |  | 0.016800017            | 0.020875242 |
| <i>Dehalobacter</i>      | 8                                | 7          |  | 0.016800017            | 0.013284245 |
| <i>Marinobacter</i>      | 8                                | 10         |  | 0.016800017            | 0.018977493 |
| <i>Thermaerobacter</i>   | 8                                | 9          |  | 0.016800017            | 0.017079743 |
| <i>Sphingopyxis</i>      | 8                                | 8          |  | 0.016800017            | 0.015181994 |



| GENUS<br>#Taxonomy         | Absolute abundance (gene number) |            |    | Relative abundance (%) |             |
|----------------------------|----------------------------------|------------|----|------------------------|-------------|
|                            | MGZ31DRh                         | MGZ31J1DRh |    | MGZ31DRh               | MGZ31J1DRh  |
| <i>Candidatus Jettenia</i> |                                  | 8          | 9  | 0.016800017            | 0.017079743 |
| <i>Halomonas</i>           |                                  | 8          | 10 | 0.016800017            | 0.018977493 |
| <i>Asticcacaulis</i>       |                                  | 8          | 8  | 0.016800017            | 0.015181994 |
| <i>Calothrix</i>           |                                  | 7          | 7  | 0.014700015            | 0.013284245 |
| <i>Treponema</i>           |                                  | 7          | 10 | 0.014700015            | 0.018977493 |
| <i>Salinibacter</i>        |                                  | 7          | 7  | 0.014700015            | 0.013284245 |
| <i>Pseudogulbenkiania</i>  |                                  | 7          | 10 | 0.014700015            | 0.018977493 |
| <i>Rudanella</i>           |                                  | 7          | 7  | 0.014700015            | 0.013284245 |
| <i>Cyanothece</i>          |                                  | 7          | 8  | 0.014700015            | 0.015181994 |
| <i>Roseomonas</i>          |                                  | 7          | 7  | 0.014700015            | 0.013284245 |
| <i>Zymomonas</i>           |                                  | 7          | 7  | 0.014700015            | 0.013284245 |
| <i>Microcystis</i>         |                                  | 7          | 10 | 0.014700015            | 0.018977493 |
| <i>Xylella</i>             |                                  | 7          | 6  | 0.014700015            | 0.011386496 |
| <i>Phaeospirillum</i>      |                                  | 7          | 7  | 0.014700015            | 0.013284245 |
| <i>Komagataeibacter</i>    |                                  | 7          | 7  | 0.014700015            | 0.013284245 |
| <i>Xanthobacter</i>        |                                  | 7          | 7  | 0.014700015            | 0.013284245 |

| GENUS<br>#Taxonomy         | Absolute abundance (gene number) |            |  | Relative abundance (%) |             |
|----------------------------|----------------------------------|------------|--|------------------------|-------------|
|                            | MGZ31DRh                         | MGZ31J1DRh |  | MGZ31DRh               | MGZ31J1DRh  |
| <i>Acetobacter</i>         | 7                                | 8          |  | 0.014700015            | 0.015181994 |
| <i>Richelia</i>            | 7                                | 8          |  | 0.014700015            | 0.015181994 |
| <i>Thermodesulfovibrio</i> | 7                                | 8          |  | 0.014700015            | 0.015181994 |
| <i>Caldilinea</i>          | 7                                | 7          |  | 0.014700015            | 0.013284245 |
| <i>Methylosinus</i>        | 7                                | 8          |  | 0.014700015            | 0.015181994 |
| <i>Methylobacter</i>       | 7                                | 9          |  | 0.014700015            | 0.017079743 |
| <i>Roseovarius</i>         | 6                                | 6          |  | 0.012600013            | 0.011386496 |
| <i>Elizabethkingia</i>     | 6                                | 5          |  | 0.012600013            | 0.009488746 |
| <i>Myxococcus</i>          | 6                                | 8          |  | 0.012600013            | 0.015181994 |
| <i>Halococcus</i>          | 6                                | 6          |  | 0.012600013            | 0.011386496 |
| <i>Uliginosibacterium</i>  | 6                                | 17         |  | 0.012600013            | 0.032261738 |
| <i>Dictyoglomus</i>        | 6                                | 6          |  | 0.012600013            | 0.011386496 |
| <i>Promicromonospora</i>   | 6                                | 6          |  | 0.012600013            | 0.011386496 |
| <i>Rhodovulum</i>          | 6                                | 6          |  | 0.012600013            | 0.011386496 |
| <i>Pelosinus</i>           | 6                                | 6          |  | 0.012600013            | 0.011386496 |
| <i>Haemophilus</i>         | 6                                | 7          |  | 0.012600013            | 0.013284245 |

| GENUS<br>#Taxonomy       | Absolute abundance (gene number) |            |  | Relative abundance (%) |             |
|--------------------------|----------------------------------|------------|--|------------------------|-------------|
|                          | MGZ31DRh                         | MGZ31J1DRh |  | MGZ31DRh               | MGZ31J1DRh  |
| <i>Actinoalloteichus</i> | 6                                | 6          |  | 0.012600013            | 0.011386496 |
| <i>Thiothrix</i>         | 6                                | 8          |  | 0.012600013            | 0.015181994 |
| <i>Desmospora</i>        | 6                                | 6          |  | 0.012600013            | 0.011386496 |
| <i>Schlesneria</i>       | 6                                | 6          |  | 0.012600013            | 0.011386496 |
| <i>Lyngbya</i>           | 6                                | 8          |  | 0.012600013            | 0.015181994 |
| <i>Magnetospirillum</i>  | 6                                | 5          |  | 0.012600013            | 0.009488746 |
| <i>Peptoclostridium</i>  | 6                                | 6          |  | 0.012600013            | 0.011386496 |
| <i>Acaryochloris</i>     | 6                                | 7          |  | 0.012600013            | 0.013284245 |
| <i>Aquamicrobium</i>     | 6                                | 5          |  | 0.012600013            | 0.009488746 |
| <i>Methyloferula</i>     | 5                                | 5          |  | 0.010500011            | 0.009488746 |
| <i>Desulfobacter</i>     | 5                                | 5          |  | 0.010500011            | 0.009488746 |
| <i>Leptolyngbya</i>      | 5                                | 6          |  | 0.010500011            | 0.011386496 |
| <i>Alcaligenes</i>       | 5                                | 6          |  | 0.010500011            | 0.011386496 |
| <i>Meiothermus</i>       | 5                                | 5          |  | 0.010500011            | 0.009488746 |
| <i>Amorphus</i>          | 5                                | 5          |  | 0.010500011            | 0.009488746 |
| <i>Enterococcus</i>      | 5                                | 8          |  | 0.010500011            | 0.015181994 |

| GENUS<br>#Taxonomy        | Absolute abundance (gene number) |            |   | Relative abundance (%) |             |
|---------------------------|----------------------------------|------------|---|------------------------|-------------|
|                           | MGZ31DRh                         | MGZ31J1DRh |   | MGZ31DRh               | MGZ31J1DRh  |
| <i>Sandarakinorhabdus</i> | 5                                | 5          | 5 | 0.010500011            | 0.009488746 |
| <i>Pseudaminobacter</i>   | 5                                | 5          | 5 | 0.010500011            | 0.009488746 |
| <i>Gluconacetobacter</i>  | 5                                | 5          | 5 | 0.010500011            | 0.009488746 |
| <i>Moorea</i>             | 5                                | 5          | 5 | 0.010500011            | 0.009488746 |
| <i>Coleofasciculus</i>    | 5                                | 5          | 5 | 0.010500011            | 0.009488746 |
| <i>Helicobacter</i>       | 5                                | 5          | 6 | 0.010500011            | 0.011386496 |
| <i>Nitrococcus</i>        | 5                                | 5          | 5 | 0.010500011            | 0.009488746 |
| <i>Rhodopirellula</i>     | 5                                | 5          | 5 | 0.010500011            | 0.009488746 |
| <i>Anaerophaga</i>        | 5                                | 5          | 5 | 0.010500011            | 0.009488746 |
| <i>Aeromonas</i>          | 5                                | 5          | 7 | 0.010500011            | 0.013284245 |
| <i>Lewinella</i>          | 5                                | 5          | 5 | 0.010500011            | 0.009488746 |
| <i>Plesiocystis</i>       | 5                                | 5          | 4 | 0.010500011            | 0.007590997 |
| <i>Thiomonas</i>          | 5                                | 5          | 5 | 0.010500011            | 0.009488746 |
| <i>Gimesia</i>            | 5                                | 5          | 5 | 0.010500011            | 0.009488746 |
| <i>Duganella</i>          | 5                                | 5          | 7 | 0.010500011            | 0.013284245 |
| <i>Rhodospirillum</i>     | 5                                | 5          | 5 | 0.010500011            | 0.009488746 |

| GENUS<br>#Taxonomy         | Absolute abundance (gene number) |            |   | Relative abundance (%) |             |
|----------------------------|----------------------------------|------------|---|------------------------|-------------|
|                            | MGZ31DRh                         | MGZ31J1DRh |   | MGZ31DRh               | MGZ31J1DRh  |
| <i>Kineosphaera</i>        |                                  | 5          | 6 | 0.010500011            | 0.011386496 |
| <i>Diplorickettsia</i>     |                                  | 5          | 7 | 0.010500011            | 0.013284245 |
| <i>Methanothermobacter</i> |                                  | 4          | 5 | 0.008400008            | 0.009488746 |
| <i>Microscilla</i>         |                                  | 4          | 4 | 0.008400008            | 0.007590997 |
| <i>Teredinibacter</i>      |                                  | 4          | 4 | 0.008400008            | 0.007590997 |
| <i>Arthrospira</i>         |                                  | 4          | 5 | 0.008400008            | 0.009488746 |
| <i>Thermosinus</i>         |                                  | 4          | 5 | 0.008400008            | 0.009488746 |
| <i>Pseudogymnoascus</i>    |                                  | 4          | 3 | 0.008400008            | 0.005693248 |
| <i>Thanatephorus</i>       |                                  | 4          | 4 | 0.008400008            | 0.007590997 |
| <i>Photorhabdus</i>        |                                  | 4          | 5 | 0.008400008            | 0.009488746 |
| <i>Chryseobacterium</i>    |                                  | 4          | 4 | 0.008400008            | 0.007590997 |
| <i>Methylosarcina</i>      |                                  | 4          | 4 | 0.008400008            | 0.007590997 |
| <i>Rhodonellum</i>         |                                  | 4          | 4 | 0.008400008            | 0.007590997 |
| <i>Hahella</i>             |                                  | 4          | 4 | 0.008400008            | 0.007590997 |
| <i>Winogradskyella</i>     |                                  | 4          | 3 | 0.008400008            | 0.005693248 |
| <i>Gryllotalpicola</i>     |                                  | 4          | 5 | 0.008400008            | 0.009488746 |

| GENUS<br>#Taxonomy                | Absolute abundance (gene number) |            |   | Relative abundance (%) |             |
|-----------------------------------|----------------------------------|------------|---|------------------------|-------------|
|                                   | MGZ31DRh                         | MGZ31J1DRh |   | MGZ31DRh               | MGZ31J1DRh  |
| <i>Candidatus Caldiarchaeum</i>   |                                  | 4          | 5 | 0.008400008            | 0.009488746 |
| <i>Candidatus Arthromitus</i>     |                                  | 4          | 4 | 0.008400008            | 0.007590997 |
| <i>Erwinia</i>                    |                                  | 4          | 4 | 0.008400008            | 0.007590997 |
| <i>Sporomusa</i>                  |                                  | 4          | 5 | 0.008400008            | 0.009488746 |
| <i>Synechococcus</i>              |                                  | 4          | 6 | 0.008400008            | 0.011386496 |
| <i>Glaciibacter</i>               |                                  | 4          | 4 | 0.008400008            | 0.007590997 |
| <i>Desulfonatronospira</i>        |                                  | 4          | 4 | 0.008400008            | 0.007590997 |
| <i>Enterobacter</i>               |                                  | 4          | 3 | 0.008400008            | 0.005693248 |
| <i>Aneurinibacillus</i>           |                                  | 4          | 5 | 0.008400008            | 0.009488746 |
| <i>Modestobacter</i>              |                                  | 4          | 5 | 0.008400008            | 0.009488746 |
| <i>Yualikevirus</i>               |                                  | 4          | 8 | 0.008400008            | 0.015181994 |
| <i>Marichromatium</i>             |                                  | 4          | 4 | 0.008400008            | 0.007590997 |
| <i>Labrenzia</i>                  |                                  | 4          | 6 | 0.008400008            | 0.011386496 |
| <i>Chitiniphilus</i>              |                                  | 4          | 5 | 0.008400008            | 0.009488746 |
| <i>Porphyromonas</i>              |                                  | 4          | 5 | 0.008400008            | 0.009488746 |
| <i>Candidatus Methyloirabilis</i> |                                  | 4          | 5 | 0.008400008            | 0.009488746 |

| GENUS<br>#Taxonomy       | Absolute abundance (gene number) |            |  | Relative abundance (%) |             |
|--------------------------|----------------------------------|------------|--|------------------------|-------------|
|                          | MGZ31DRh                         | MGZ31J1DRh |  | MGZ31DRh               | MGZ31J1DRh  |
| <i>Haloferax</i>         | 4                                | 5          |  | 0.008400008            | 0.009488746 |
| <i>Chlorobium</i>        | 4                                | 4          |  | 0.008400008            | 0.007590997 |
| <i>Staphylococcus</i>    | 4                                | 6          |  | 0.008400008            | 0.011386496 |
| <i>Pseudanabaena</i>     | 4                                | 3          |  | 0.008400008            | 0.005693248 |
| <i>Dietzia</i>           | 4                                | 5          |  | 0.008400008            | 0.009488746 |
| <i>Natronococcus</i>     | 4                                | 4          |  | 0.008400008            | 0.007590997 |
| <i>Actinomycetospora</i> | 4                                | 3          |  | 0.008400008            | 0.005693248 |
| <i>Pandoraea</i>         | 4                                | 6          |  | 0.008400008            | 0.011386496 |
| <i>Desulfospira</i>      | 4                                | 4          |  | 0.008400008            | 0.007590997 |
| <i>Proteiniphilum</i>    | 4                                | 4          |  | 0.008400008            | 0.007590997 |
| <i>Anaerolinea</i>       | 3                                | 3          |  | 0.006300006            | 0.005693248 |
| <i>Selenomonas</i>       | 3                                | 5          |  | 0.006300006            | 0.009488746 |
| <i>Anaeromusa</i>        | 3                                | 3          |  | 0.006300006            | 0.005693248 |
| <i>Nesterenkonia</i>     | 3                                | 3          |  | 0.006300006            | 0.005693248 |
| <i>Roseobacter</i>       | 3                                | 3          |  | 0.006300006            | 0.005693248 |
| <i>Desulfurispora</i>    | 3                                | 3          |  | 0.006300006            | 0.005693248 |

| GENUS<br>#Taxonomy           | Absolute abundance (gene number) |            |  | Relative abundance (%) |             |
|------------------------------|----------------------------------|------------|--|------------------------|-------------|
|                              | MGZ31DRh                         | MGZ31J1DRh |  | MGZ31DRh               | MGZ31J1DRh  |
| <i>Gillisia</i>              | 3                                | 3          |  | 0.006300006            | 0.005693248 |
| <i>Balneola</i>              | 3                                | 3          |  | 0.006300006            | 0.005693248 |
| <i>Candidatus Microthrix</i> | 3                                | 5          |  | 0.006300006            | 0.009488746 |
| <i>Methylophilus</i>         | 3                                | 2          |  | 0.006300006            | 0.003795499 |
| <i>Leisingera</i>            | 3                                | 3          |  | 0.006300006            | 0.005693248 |
| <i>Methylacidiphilum</i>     | 3                                | 3          |  | 0.006300006            | 0.005693248 |
| <i>Anaerobaculum</i>         | 3                                | 4          |  | 0.006300006            | 0.007590997 |
| <i>Legionella</i>            | 3                                | 7          |  | 0.006300006            | 0.013284245 |
| <i>Macrophomina</i>          | 3                                | 3          |  | 0.006300006            | 0.005693248 |
| <i>Methylovulum</i>          | 3                                | 3          |  | 0.006300006            | 0.005693248 |
| <i>Ruminiclostridium</i>     | 3                                | 5          |  | 0.006300006            | 0.009488746 |
| <i>Caenispirillum</i>        | 3                                | 3          |  | 0.006300006            | 0.005693248 |
| <i>Oceanibaculum</i>         | 3                                | 5          |  | 0.006300006            | 0.009488746 |
| <i>Heliobacillus</i>         | 3                                | 4          |  | 0.006300006            | 0.007590997 |
| <i>Coprococcus</i>           | 3                                | 3          |  | 0.006300006            | 0.005693248 |
| <i>Arenimonas</i>            | 3                                | 4          |  | 0.006300006            | 0.007590997 |



| GENUS<br>#Taxonomy     | Absolute abundance (gene number) |            |  | Relative abundance (%) |             |
|------------------------|----------------------------------|------------|--|------------------------|-------------|
|                        | MGZ31DRh                         | MGZ31J1DRh |  | MGZ31DRh               | MGZ31J1DRh  |
| <i>Rickettsia</i>      | 3                                | 7          |  | 0.006300006            | 0.013284245 |
| <i>Bifidobacterium</i> | 3                                | 4          |  | 0.006300006            | 0.007590997 |
| <i>Thalassobium</i>    | 3                                | 3          |  | 0.006300006            | 0.005693248 |
| <i>Advenella</i>       | 3                                | 3          |  | 0.006300006            | 0.005693248 |
| <i>Methanosarcina</i>  | 3                                | 4          |  | 0.006300006            | 0.007590997 |
| <i>Laceyella</i>       | 3                                | 4          |  | 0.006300006            | 0.007590997 |
| <i>Mariprofundus</i>   | 3                                | 4          |  | 0.006300006            | 0.007590997 |
| <i>Caldimonas</i>      | 3                                | 5          |  | 0.006300006            | 0.009488746 |
| <i>Marteella</i>       | 3                                | 6          |  | 0.006300006            | 0.011386496 |
| <i>Clavibacter</i>     | 3                                | 3          |  | 0.006300006            | 0.005693248 |
| <i>Solitalea</i>       | 3                                |            |  | 0.006300006            |             |
| <i>Chlorobaculum</i>   | 3                                | 3          |  | 0.006300006            | 0.005693248 |
| <i>Dasania</i>         | 3                                | 3          |  | 0.006300006            | 0.005693248 |
| <i>Alcanivorax</i>     | 3                                | 3          |  | 0.006300006            | 0.005693248 |
| <i>Cecembia</i>        | 3                                | 3          |  | 0.006300006            | 0.005693248 |
| <i>T7likevirus</i>     | 3                                | 6          |  | 0.006300006            | 0.011386496 |

| GENUS<br>#Taxonomy            | Absolute abundance (gene number) |            |  | Relative abundance (%) |             |
|-------------------------------|----------------------------------|------------|--|------------------------|-------------|
|                               | MGZ31DRh                         | MGZ31J1DRh |  | MGZ31DRh               | MGZ31J1DRh  |
| <i>Kordiimonas</i>            | 3                                | 3          |  | 0.006300006            | 0.005693248 |
| <i>Candidatus Korarchaeum</i> | 3                                | 6          |  | 0.006300006            | 0.011386496 |
| <i>Serratia</i>               | 3                                | 3          |  | 0.006300006            | 0.005693248 |
| <i>Myroides</i>               | 3                                | 4          |  | 0.006300006            | 0.007590997 |
| <i>Phenylobacterium</i>       | 3                                | 3          |  | 0.006300006            | 0.005693248 |
| <i>Pantoea</i>                | 3                                | 3          |  | 0.006300006            | 0.005693248 |
| <i>Hyphomicrobium</i>         | 3                                | 3          |  | 0.006300006            | 0.005693248 |
| <i>Sulfurihydrogenibium</i>   | 3                                | 5          |  | 0.006300006            | 0.009488746 |
| <i>Kiloniella</i>             | 3                                | 3          |  | 0.006300006            | 0.005693248 |
| <i>Caldalkalibacillus</i>     | 3                                |            |  | 0.006300006            |             |
| <i>Roseibium</i>              | 3                                | 3          |  | 0.006300006            | 0.005693248 |
| <i>Tomitella</i>              | 3                                | 4          |  | 0.006300006            | 0.007590997 |
| <i>Effusibacillus</i>         | 3                                | 3          |  | 0.006300006            | 0.005693248 |
| <i>Fluoribacter</i>           | 3                                | 3          |  | 0.006300006            | 0.005693248 |
| <i>Methylotenera</i>          | 3                                | 5          |  | 0.006300006            | 0.009488746 |
| <i>Nevskia</i>                | 3                                |            |  | 0.006300006            |             |

| GENUS<br>#Taxonomy       | Absolute abundance (gene number) |            |       | Relative abundance (%) |             |
|--------------------------|----------------------------------|------------|-------|------------------------|-------------|
|                          | MGZ31DRh                         | MGZ31J1DRh |       | MGZ31DRh               | MGZ31J1DRh  |
| <i>Edwardsiella</i>      |                                  | 3          |       | 0.006300006            |             |
| <i>Conexibacter</i>      |                                  | 3          | 3     | 0.006300006            | 0.005693248 |
| <i>Actinobaculum</i>     |                                  | 3          | 3     | 0.006300006            | 0.005693248 |
| <i>Chlamydia</i>         |                                  | 3          | 4     | 0.006300006            | 0.007590997 |
| <i>Lachnoclostridium</i> |                                  | 3          | 3     | 0.006300006            | 0.005693248 |
| <i>Fulvivirga</i>        |                                  | 3          | 3     | 0.006300006            | 0.005693248 |
| <i>Thermotoga</i>        |                                  | 3          | 5     | 0.006300006            | 0.009488746 |
| <i>Alicyclobacillus</i>  |                                  | 3          | 6     | 0.006300006            | 0.011386496 |
| SUM                      |                                  | 47185      | 52141 | 99.08859908            | 98.95054465 |

| SPECIES<br>#Taxonomy                                   | Absolute abundance (gene number) |            | Relative abundance (%) |             |
|--------------------------------------------------------|----------------------------------|------------|------------------------|-------------|
|                                                        | MGZ31DRh                         | MGZ31J1DRh | MGZ31DRh               | MGZ31J1DRh  |
| <i>Unclassified</i>                                    | 19866                            | 21836      | 41.71864172            | 41.43925305 |
| <i>Unknown</i>                                         | 10083                            | 12115      | 21.17432117            | 22.9912324  |
| <i>Bradyrhizobium elkanii</i>                          | 4778                             | 4724       | 10.03381003            | 8.964967548 |
| <i>Ralstonia pickettii</i>                             | 1685                             | 1707       | 3.538503539            | 3.239458003 |
| <i>Gemmatimonadetes bacterium KBS708</i>               | 1278                             | 1371       | 2.683802684            | 2.601814248 |
| <i>Acidobacteriaceae bacterium TAA166</i>              | 676                              | 761        | 1.41960142             | 1.444187194 |
| <i>Mucilaginibacter paludis</i>                        | 467                              | 483        | 0.980700981            | 0.916612897 |
| <i>Aeromicrobium marinum</i>                           | 419                              | 423        | 0.87990088             | 0.802747941 |
| <i>Bradyrhizobium japonicum</i>                        | 356                              | 346        | 0.747600748            | 0.656621247 |
| <i>Rudaea cellulositytica</i>                          | 312                              | 323        | 0.655200655            | 0.612973014 |
| <i>Cytophagales bacterium B6</i>                       | 273                              | 296        | 0.573300573            | 0.561733784 |
| <i>Ktedonobacter racemifer</i>                         | 197                              | 221        | 0.413700414            | 0.419402589 |
| <i>Variovorax paradoxus</i>                            | 129                              | 135        | 0.270900271            | 0.256196151 |
| <i>Pseudomonas syringae</i>                            | 106                              | 126        | 0.222600223            | 0.239116408 |
| <i>Candidatus Koribacter versatilis</i>                | 106                              | 118        | 0.222600223            | 0.223934414 |
| <i>Ralstonia solanacearum</i>                          | 88                               | 96         | 0.184800185            | 0.18218393  |
| <i>Burkholderia sp. TJI49</i>                          | 84                               | 98         | 0.176400176            | 0.185979428 |
| <i>Sphingomonas wittichii</i>                          | 72                               | 70         | 0.151200151            | 0.132842449 |
| <i>Pedobacter sp. V48</i>                              | 72                               | 77         | 0.151200151            | 0.146126694 |
| <i>candidate division TM7 single-cell isolate TM7c</i> | 68                               | 73         | 0.142800143            | 0.138535697 |
| <i>Novosphingobium sp. AP12</i>                        | 66                               | 64         | 0.138600139            | 0.121455953 |
| <i>Sphingomonas-like bacterium B12</i>                 | 65                               | 63         | 0.136500137            | 0.119558204 |
| <i>Polaromonas sp. CF318</i>                           | 62                               | 87         | 0.13020013             | 0.165104186 |

| SPECIES<br>#Taxonomy                     | Absolute abundance (gene number) |            | Relative abundance (%) |             |
|------------------------------------------|----------------------------------|------------|------------------------|-------------|
|                                          | MGZ31DRh                         | MGZ31J1DRh | MGZ31DRh               | MGZ31J1DRh  |
| <i>Burkholderia pseudomallei</i>         | 58                               | 65         | 0.121800122            | 0.123353703 |
| <i>Sphingomonas sp. KC8</i>              | 55                               | 56         | 0.115500116            | 0.106273959 |
| <i>Bradyrhizobium sp. Tv2a-2</i>         | 50                               | 49         | 0.105000105            | 0.092989714 |
| <i>Rhodopseudomonas sp. B29</i>          | 48                               | 47         | 0.100800101            | 0.089194216 |
| <i>Patulibacter medicamentivorans</i>    | 47                               | 58         | 0.098700099            | 0.110069458 |
| <i>Burkholderia sp. JPY347</i>           | 47                               | 55         | 0.098700099            | 0.10437621  |
| <i>Pseudomonas aeruginosa</i>            | 45                               | 47         | 0.094500095            | 0.089194216 |
| <i>Caulobacter vibrioides</i>            | 44                               | 44         | 0.092400092            | 0.083500968 |
| <i>Pedobacter agri</i>                   | 42                               | 46         | 0.088200088            | 0.087296466 |
| <i>Xanthomonas axonopodis</i>            | 41                               | 43         | 0.086100086            | 0.081603219 |
| <i>Cystobacter fuscus</i>                | 38                               | 42         | 0.07980008             | 0.079705469 |
| <i>Sphingomonas sp. PR090111-T3T-6A</i>  | 35                               | 35         | 0.073500074            | 0.066421224 |
| <i>Bradyrhizobium sp. DOA9</i>           | 35                               | 36         | 0.073500074            | 0.068318974 |
| <i>Escherichia coli</i>                  | 35                               | 43         | 0.073500074            | 0.081603219 |
| <i>Novosphingobium pentaromativorans</i> | 35                               | 36         | 0.073500074            | 0.068318974 |
| <i>Nocardioides sp. CF8</i>              | 34                               | 36         | 0.071400071            | 0.068318974 |
| <i>Novosphingobium nitrogenifigens</i>   | 33                               | 27         | 0.069300069            | 0.05123923  |
| <i>Sinorhizobium meliloti</i>            | 33                               | 32         | 0.069300069            | 0.060727977 |
| <i>Nocardioidaceae bacterium Broad-1</i> | 33                               | 36         | 0.069300069            | 0.068318974 |
| <i>Terriglobus roseus</i>                | 33                               | 33         | 0.069300069            | 0.062625726 |
| <i>Rhizobium leguminosarum</i>           | 32                               | 35         | 0.067200067            | 0.066421224 |
| <i>Pedosphaera parvula</i>               | 32                               | 37         | 0.067200067            | 0.070216723 |
| <i>Sphingomonas sp. LH128</i>            | 31                               | 34         | 0.065100065            | 0.064523475 |

| SPECIES<br>#Taxonomy                            | Absolute abundance (gene number) |            | Relative abundance (%) |             |
|-------------------------------------------------|----------------------------------|------------|------------------------|-------------|
|                                                 | MGZ31DRh                         | MGZ31J1DRh | MGZ31DRh               | MGZ31J1DRh  |
| <i>Kutzneria sp. 744</i>                        | 31                               | 34         | 0.065100065            | 0.064523475 |
| <i>Bradyrhizobium sp. YR681</i>                 | 31                               | 33         | 0.065100065            | 0.062625726 |
| <i>Caulobacter sp. AP07</i>                     | 30                               | 34         | 0.063000063            | 0.064523475 |
| <i>Smaragdicoccus niigatensis</i>               | 29                               | 29         | 0.060900061            | 0.055034729 |
| <i>Patulibacter americanus</i>                  | 29                               | 38         | 0.060900061            | 0.072114472 |
| <i>Mycobacterium avium</i>                      | 29                               | 33         | 0.060900061            | 0.062625726 |
| <i>Agrobacterium tumefaciens</i>                | 29                               | 32         | 0.060900061            | 0.060727977 |
| <i>Segetibacter koreensis</i>                   | 27                               | 30         | 0.056700057            | 0.056932478 |
| <i>Gloeobacter violaceus</i>                    | 27                               | 30         | 0.056700057            | 0.056932478 |
| <i>Rubrobacter radiotolerans</i>                | 27                               | 29         | 0.056700057            | 0.055034729 |
| <i>Novosphingobium tardaugens</i>               | 26                               | 27         | 0.054600055            | 0.05123923  |
| <i>Cupriavidus basilensis</i>                   | 26                               | 26         | 0.054600055            | 0.049341481 |
| <i>Candidatus Magnetoglobus multicellularis</i> | 25                               | 33         | 0.052500053            | 0.062625726 |
| <i>Kribbella catacumbae</i>                     | 25                               | 27         | 0.052500053            | 0.05123923  |
| <i>Bradyrhizobium sp. WSM1253</i>               | 25                               | 24         | 0.052500053            | 0.045545982 |
| <i>Chondromyces apiculatus</i>                  | 25                               | 27         | 0.052500053            | 0.05123923  |
| <i>Microvirga lotononidis</i>                   | 24                               | 26         | 0.05040005             | 0.049341481 |
| <i>Caldithrix abyssi</i>                        | 24                               | 25         | 0.05040005             | 0.047443732 |
| <i>Mesorhizobium alhagi</i>                     | 24                               | 23         | 0.05040005             | 0.043648233 |
| <i>Salmonella enterica</i>                      | 23                               | 31         | 0.048300048            | 0.058830227 |
| <i>Verminephrobacter aporrectodeae</i>          | 22                               | 30         | 0.046200046            | 0.056932478 |
| <i>Rubellimicrobium mesophilum</i>              | 22                               | 21         | 0.046200046            | 0.039852735 |
| <i>Geobacter sulfurreducens</i>                 | 22                               | 23         | 0.046200046            | 0.043648233 |

| SPECIES<br>#Taxonomy                                     | Absolute abundance (gene number) |            | Relative abundance (%) |             |
|----------------------------------------------------------|----------------------------------|------------|------------------------|-------------|
|                                                          | MGZ31DRh                         | MGZ31J1DRh | MGZ31DRh               | MGZ31J1DRh  |
| <i>Sordaria macrospora</i>                               | 22                               | 25         | 0.046200046            | 0.047443732 |
| <i>Sphingomonas paucimobilis</i>                         | 21                               | 21         | 0.044100044            | 0.039852735 |
| <i>Candidatus Solibacter usitatus</i>                    | 21                               | 22         | 0.044100044            | 0.041750484 |
| <i>Chloroflexus aurantiacus</i>                          | 21                               | 24         | 0.044100044            | 0.045545982 |
| <i>Ideonella sp. B508-1</i>                              | 21                               | 27         | 0.044100044            | 0.05123923  |
| <i>Intrasporangium chromatireducens</i>                  | 20                               | 21         | 0.042000042            | 0.039852735 |
| <i>Saccharicrinis fermentans</i>                         | 20                               | 25         | 0.042000042            | 0.047443732 |
| <i>Stigmatella aurantiaca</i>                            | 20                               | 21         | 0.042000042            | 0.039852735 |
| <i>Bradyrhizobium sp. STM 3843</i>                       | 20                               | 20         | 0.042000042            | 0.037954985 |
| <i>Nitrobacter sp. Nb-311A</i>                           | 20                               | 19         | 0.042000042            | 0.036057236 |
| <i>Curvibacter putative symbiont of Hydra magnipapil</i> | 20                               | 29         | 0.042000042            | 0.055034729 |
| <i>Acidovorax sp. CF316</i>                              | 20                               | 27         | 0.042000042            | 0.05123923  |
| <i>Novosphingobium sp. Rr 2-17</i>                       | 20                               | 20         | 0.042000042            | 0.037954985 |
| <i>Novosphingobium resinovorum</i>                       | 19                               | 18         | 0.03990004             | 0.034159487 |
| <i>Crocospaera watsonii</i>                              | 19                               | 22         | 0.03990004             | 0.041750484 |
| <i>Burkholderia multivorans</i>                          | 19                               | 20         | 0.03990004             | 0.037954985 |
| <i>Variovorax sp. CF313</i>                              | 19                               | 25         | 0.03990004             | 0.047443732 |
| <i>Microbispora sp. ATCC PTA-5024</i>                    | 19                               | 22         | 0.03990004             | 0.041750484 |
| <i>Candidatus Nitrosoarchaeum limnia</i>                 | 18                               | 51         | 0.037800038            | 0.096785213 |
| <i>Sphingobium sp. AP49</i>                              | 18                               | 17         | 0.037800038            | 0.032261738 |
| <i>Frankia sp. EUN1f</i>                                 | 18                               | 20         | 0.037800038            | 0.037954985 |
| <i>Sphingobium yanoikuyae</i>                            | 18                               | 18         | 0.037800038            | 0.034159487 |
| <i>Sphingobacterium spiritivorum</i>                     | 17                               | 17         | 0.035700036            | 0.032261738 |

| SPECIES<br>#Taxonomy                    | Absolute abundance (gene number) |            | Relative abundance (%) |             |
|-----------------------------------------|----------------------------------|------------|------------------------|-------------|
|                                         | MGZ31DRh                         | MGZ31J1DRh | MGZ31DRh               | MGZ31J1DRh  |
| <i>Sphingomonas melonis</i>             | 17                               | 18         | 0.035700036            | 0.034159487 |
| <i>Acidithiobacillus sp. GGI-221</i>    | 17                               | 19         | 0.035700036            | 0.036057236 |
| <i>Methylobacterium extorquens</i>      | 17                               | 18         | 0.035700036            | 0.034159487 |
| <i>Pseudomonas putida</i>               | 17                               | 18         | 0.035700036            | 0.034159487 |
| <i>Mesorhizobium loti</i>               | 16                               | 17         | 0.033600034            | 0.032261738 |
| <i>Actinoplanes globisporus</i>         | 16                               | 18         | 0.033600034            | 0.034159487 |
| <i>Beggiatoa sp. PS</i>                 | 16                               | 19         | 0.033600034            | 0.036057236 |
| <i>Pedobacter arcticus</i>              | 16                               | 16         | 0.033600034            | 0.030363988 |
| <i>Sphingobium quisquiliarum</i>        | 16                               | 19         | 0.033600034            | 0.036057236 |
| <i>Sphingomonas sp. PAMC 26605</i>      | 16                               | 15         | 0.033600034            | 0.028466239 |
| <i>Dyella japonica</i>                  | 16                               | 16         | 0.033600034            | 0.030363988 |
| <i>Burkholderia ubonensis</i>           | 16                               | 16         | 0.033600034            | 0.030363988 |
| <i>Xanthomonas oryzae</i>               | 16                               | 16         | 0.033600034            | 0.030363988 |
| <i>Sporichthya polymorpha</i>           | 16                               | 16         | 0.033600034            | 0.030363988 |
| <i>Acinetobacter baumannii</i>          | 16                               | 18         | 0.033600034            | 0.034159487 |
| <i>Chloracidobacterium thermophilum</i> | 15                               | 16         | 0.031500032            | 0.030363988 |
| <i>Niabella soli</i>                    | 15                               | 16         | 0.031500032            | 0.030363988 |
| <i>Sphingomonas elodea</i>              | 15                               | 17         | 0.031500032            | 0.032261738 |
| <i>Burkholderia sp. RPE67</i>           | 15                               | 19         | 0.031500032            | 0.036057236 |
| <i>Stenotrophomonas maltophilia</i>     | 15                               | 14         | 0.031500032            | 0.02656849  |
| <i>Actinomadura madurae</i>             | 15                               | 15         | 0.031500032            | 0.028466239 |
| <i>Blastococcus saxobidens</i>          | 15                               | 16         | 0.031500032            | 0.030363988 |
| <i>Pontibacter sp. BAB1700</i>          | 15                               | 15         | 0.031500032            | 0.028466239 |



| SPECIES<br>#Taxonomy                       | Absolute abundance (gene number) |            | Relative abundance (%) |             |
|--------------------------------------------|----------------------------------|------------|------------------------|-------------|
|                                            | MGZ31DRh                         | MGZ31J1DRh | MGZ31DRh               | MGZ31J1DRh  |
| <i>Cryptosporangium arzum</i>              | 14                               | 15         | 0.029400029            | 0.028466239 |
| <i>Gemmata obscuriglobus</i>               | 14                               | 16         | 0.029400029            | 0.030363988 |
| <i>Acidobacterium capsulatum</i>           | 14                               | 18         | 0.029400029            | 0.034159487 |
| <i>Azospirillum brasilense</i>             | 14                               | 19         | 0.029400029            | 0.036057236 |
| <i>Acidovorax delafieldii</i>              | 14                               | 22         | 0.029400029            | 0.041750484 |
| <i>Candidatus Poribacteria sp. WGA-4E</i>  | 13                               | 14         | 0.027300027            | 0.02656849  |
| <i>Ralstonia syzygii</i>                   | 13                               | 16         | 0.027300027            | 0.030363988 |
| <i>Rhodococcus opacus</i>                  | 13                               | 15         | 0.027300027            | 0.028466239 |
| <i>Actinopolymorpha alba</i>               | 13                               | 15         | 0.027300027            | 0.028466239 |
| <i>Candidatus Kuenenia stuttgartiensis</i> | 13                               | 14         | 0.027300027            | 0.02656849  |
| <i>Burkholderia thailandensis</i>          | 13                               | 16         | 0.027300027            | 0.030363988 |
| <i>Dyella ginsengisoli</i>                 | 13                               | 12         | 0.027300027            | 0.022772991 |
| <i>Janthinobacterium sp. Marseille</i>     | 13                               | 11         | 0.027300027            | 0.020875242 |
| <i>Gemmatimonas aurantiaca</i>             | 13                               | 14         | 0.027300027            | 0.02656849  |
| <i>Yersinia pestis</i>                     | 13                               | 13         | 0.027300027            | 0.024670741 |
| <i>Curvibacter lanceolatus</i>             | 13                               | 15         | 0.027300027            | 0.028466239 |
| <i>Pseudoalteromonas haloplanktis</i>      | 13                               | 12         | 0.027300027            | 0.022772991 |
| <i>Burkholderiales bacterium JOSHI_001</i> | 13                               | 15         | 0.027300027            | 0.028466239 |
| <i>Neisseria meningitidis</i>              | 12                               | 12         | 0.025200025            | 0.022772991 |
| <i>Comamonas testosteroni</i>              | 12                               | 13         | 0.025200025            | 0.024670741 |
| <i>Streptomyces sp. TOR3209</i>            | 12                               | 11         | 0.025200025            | 0.020875242 |
| <i>Salinispora arenicola</i>               | 12                               | 13         | 0.025200025            | 0.024670741 |
| <i>Chthoniobacter flavus</i>               | 12                               | 16         | 0.025200025            | 0.030363988 |

| SPECIES<br>#Taxonomy                    | Absolute abundance (gene number) |            | Relative abundance (%) |             |
|-----------------------------------------|----------------------------------|------------|------------------------|-------------|
|                                         | MGZ31DRh                         | MGZ31J1DRh | MGZ31DRh               | MGZ31J1DRh  |
| <i>Frankia sp. BMG5.12</i>              | 12                               | 12         | 0.025200025            | 0.022772991 |
| <i>Catelliglobospora koreensis</i>      | 12                               | 13         | 0.025200025            | 0.024670741 |
| <i>Granulicella tundricola</i>          | 12                               | 12         | 0.025200025            | 0.022772991 |
| <i>Dyadobacter beijingsensis</i>        | 11                               | 11         | 0.023100023            | 0.020875242 |
| <i>Leptospira interrogans</i>           | 11                               | 13         | 0.023100023            | 0.024670741 |
| <i>Ramlibacter tataouinensis</i>        | 11                               | 17         | 0.023100023            | 0.032261738 |
| <i>Desulfococcus multivorans</i>        | 11                               | 11         | 0.023100023            | 0.020875242 |
| <i>Streptomyces turgidiscabies</i>      | 11                               | 10         | 0.023100023            | 0.018977493 |
| <i>Erythrobacter sp. SD-21</i>          | 11                               | 10         | 0.023100023            | 0.018977493 |
| <i>Massilia niastensis</i>              | 11                               | 12         | 0.023100023            | 0.022772991 |
| <i>Burkholderia sp. H160</i>            | 11                               | 14         | 0.023100023            | 0.02656849  |
| <i>Oxalobacteraceae bacterium AB_14</i> | 11                               | 13         | 0.023100023            | 0.024670741 |
| <i>Bordetella pertussis</i>             | 11                               | 11         | 0.023100023            | 0.020875242 |
| <i>Herbaspirillum lusitanum</i>         | 11                               | 12         | 0.023100023            | 0.022772991 |
| <i>Fischerella muscicola</i>            | 11                               | 10         | 0.023100023            | 0.018977493 |
| <i>Longispora albida</i>                | 11                               | 10         | 0.023100023            | 0.018977493 |
| <i>Frankia sp. BCU110501</i>            | 11                               | 12         | 0.023100023            | 0.022772991 |
| <i>Micromonospora sp. M42</i>           | 11                               | 11         | 0.023100023            | 0.020875242 |
| <i>Leifsonia aquatica</i>               | 11                               | 13         | 0.023100023            | 0.024670741 |
| <i>Rhizobium sp. LPU83</i>              | 10                               | 10         | 0.021000021            | 0.018977493 |
| <i>Hydrogenivirga sp. 128-5-R1-1</i>    | 10                               | 13         | 0.021000021            | 0.024670741 |
| <i>Oscillochloris trichoides</i>        | 10                               | 12         | 0.021000021            | 0.022772991 |
| <i>Methylobacterium sp. WSM2598</i>     | 10                               | 11         | 0.021000021            | 0.020875242 |

| SPECIES<br>#Taxonomy                      | Absolute abundance (gene number) |            | Relative abundance (%) |             |
|-------------------------------------------|----------------------------------|------------|------------------------|-------------|
|                                           | MGZ31DRh                         | MGZ31J1DRh | MGZ31DRh               | MGZ31J1DRh  |
| <i>Streptomyces roseochromogenus</i>      | 10                               | 10         | 0.021000021            | 0.018977493 |
| <i>Burkholderia glumae</i>                | 10                               | 10         | 0.021000021            | 0.018977493 |
| <i>Oscillatoria sp. PCC 10802</i>         | 10                               | 10         | 0.021000021            | 0.018977493 |
| <i>Thermodesulfatator atlanticus</i>      | 10                               | 11         | 0.021000021            | 0.020875242 |
| <i>Pedobacter sp. BAL39</i>               | 10                               | 11         | 0.021000021            | 0.020875242 |
| <i>Mesorhizobium ciceri</i>               | 10                               | 10         | 0.021000021            | 0.018977493 |
| <i>Chlorogloeopsis fritschii</i>          | 10                               | 11         | 0.021000021            | 0.020875242 |
| <i>Acetobacteraceae bacterium AT-5844</i> | 10                               | 10         | 0.021000021            | 0.018977493 |
| <i>Kaistia granuli</i>                    | 10                               | 9          | 0.021000021            | 0.017079743 |
| <i>Zavarzinella formosa</i>               | 10                               | 12         | 0.021000021            | 0.022772991 |
| <i>Nocardiopsis lucentensis</i>           | 9                                | 10         | 0.018900019            | 0.018977493 |
| <i>Geopsychrobacter electrodiphilus</i>   | 9                                | 9          | 0.018900019            | 0.017079743 |
| <i>Burkholderia kururiensis</i>           | 9                                | 10         | 0.018900019            | 0.018977493 |
| <i>Cupriavidus sp. SK-4</i>               | 9                                | 11         | 0.018900019            | 0.020875242 |
| <i>Rhodococcus wratislaviensis</i>        | 9                                | 11         | 0.018900019            | 0.020875242 |
| <i>Granulicella mallensis</i>             | 9                                | 11         | 0.018900019            | 0.020875242 |
| <i>Delftia acidovorans</i>                | 9                                | 10         | 0.018900019            | 0.018977493 |
| <i>Pseudonocardia sp. P1</i>              | 9                                | 9          | 0.018900019            | 0.017079743 |
| <i>Singulisphaera acidiphila</i>          | 9                                | 10         | 0.018900019            | 0.018977493 |
| <i>Streptomyces bottropensis</i>          | 9                                | 10         | 0.018900019            | 0.018977493 |
| <i>Sphingomonas echinoides</i>            | 9                                | 8          | 0.018900019            | 0.015181994 |
| <i>Nitrosospira briensis</i>              | 9                                | 11         | 0.018900019            | 0.020875242 |
| <i>Actinotalea ferrariae</i>              | 9                                | 11         | 0.018900019            | 0.020875242 |

| SPECIES<br>#Taxonomy                  | Absolute abundance (gene number) |            | Relative abundance (%) |             |
|---------------------------------------|----------------------------------|------------|------------------------|-------------|
|                                       | MGZ31DRh                         | MGZ31J1DRh | MGZ31DRh               | MGZ31J1DRh  |
| <i>Streptomyces scabrisporus</i>      | 9                                | 10         | 0.018900019            | 0.018977493 |
| <i>Afipia clevelandensis</i>          | 9                                | 7          | 0.018900019            | 0.013284245 |
| <i>Pseudomonas savastanoi</i>         | 9                                | 8          | 0.018900019            | 0.015181994 |
| <i>Hylemonella gracilis</i>           | 9                                | 9          | 0.018900019            | 0.017079743 |
| <i>Moorella thermoacetica</i>         | 9                                | 9          | 0.018900019            | 0.017079743 |
| <i>Thauera phenylacetica</i>          | 9                                | 9          | 0.018900019            | 0.017079743 |
| <i>Burkholderia terrae</i>            | 9                                | 10         | 0.018900019            | 0.018977493 |
| <i>Nitrospina gracilis</i>            | 9                                | 8          | 0.018900019            | 0.015181994 |
| <i>Bacillus cereus</i>                | 9                                | 12         | 0.018900019            | 0.022772991 |
| <i>Rhodomicrobium udaipurensis</i>    | 9                                | 8          | 0.018900019            | 0.015181994 |
| <i>Terriglobus saanensis</i>          | 9                                | 11         | 0.018900019            | 0.020875242 |
| <i>Mycobacterium tuberculosis</i>     | 9                                | 11         | 0.018900019            | 0.020875242 |
| <i>Frankia sp. QA3</i>                | 9                                | 8          | 0.018900019            | 0.015181994 |
| <i>Scytonema hofmanni</i>             | 9                                | 9          | 0.018900019            | 0.017079743 |
| <i>Candidatus Nitrospira defluvii</i> | 8                                | 9          | 0.016800017            | 0.017079743 |
| <i>Pseudomonas stutzeri</i>           | 8                                | 8          | 0.016800017            | 0.015181994 |
| <i>Solimonas variicoloris</i>         | 8                                | 10         | 0.016800017            | 0.018977493 |
| <i>Sinorhizobium medicae</i>          | 8                                | 6          | 0.016800017            | 0.011386496 |
| <i>Bacillus subtilis</i>              | 8                                | 11         | 0.016800017            | 0.020875242 |
| <i>Brucella abortus</i>               | 8                                | 8          | 0.016800017            | 0.015181994 |
| <i>Acidovorax avenae</i>              | 8                                | 12         | 0.016800017            | 0.022772991 |
| <i>Sphingobium ummariense</i>         | 8                                | 7          | 0.016800017            | 0.013284245 |
| <i>Xanthomonas phage Xp15</i>         | 8                                | 6          | 0.016800017            | 0.011386496 |

| SPECIES<br>#Taxonomy                    | Absolute abundance (gene number) |            | Relative abundance (%) |             |
|-----------------------------------------|----------------------------------|------------|------------------------|-------------|
|                                         | MGZ31DRh                         | MGZ31J1DRh | MGZ31DRh               | MGZ31J1DRh  |
| <i>delta proteobacterium MLMS-1</i>     | 8                                | 10         | 0.016800017            | 0.018977493 |
| <i>Achromobacter xylosoxidans</i>       | 8                                | 12         | 0.016800017            | 0.022772991 |
| <i>Azoarcus toluclasticus</i>           | 8                                | 10         | 0.016800017            | 0.018977493 |
| <i>Fibrisoma limi</i>                   | 8                                | 8          | 0.016800017            | 0.015181994 |
| <i>Flavobacterium sp. CF136</i>         | 8                                | 9          | 0.016800017            | 0.017079743 |
| <i>Gracilimonas tropica</i>             | 8                                | 7          | 0.016800017            | 0.013284245 |
| <i>Streptomyces sp. PRh5</i>            | 8                                | 8          | 0.016800017            | 0.015181994 |
| <i>Hymenobacter norwichensis</i>        | 8                                | 9          | 0.016800017            | 0.017079743 |
| <i>Parabacteroides johnsonii</i>        | 8                                | 9          | 0.016800017            | 0.017079743 |
| <i>Streptomyces zinciresistens</i>      | 8                                | 9          | 0.016800017            | 0.017079743 |
| <i>Sphingomonas sp. Mn802worker</i>     | 8                                | 8          | 0.016800017            | 0.015181994 |
| <i>Streptomyces albulus</i>             | 8                                | 8          | 0.016800017            | 0.015181994 |
| <i>Mycobacterium abscessus</i>          | 8                                | 10         | 0.016800017            | 0.018977493 |
| <i>Deinococcus apachensis</i>           | 8                                | 8          | 0.016800017            | 0.015181994 |
| <i>Pseudomonas fluorescens</i>          | 8                                | 10         | 0.016800017            | 0.018977493 |
| <i>Citromicrobium bathyomarinum</i>     | 8                                | 9          | 0.016800017            | 0.017079743 |
| <i>Candidatus Jettenia caeni</i>        | 8                                | 9          | 0.016800017            | 0.017079743 |
| <i>Burkholderia cenocepacia</i>         | 7                                | 9          | 0.014700015            | 0.017079743 |
| <i>Thermodesulfovibrio yellowstonii</i> | 7                                | 8          | 0.014700015            | 0.015181994 |
| <i>Sphingopyxis baekryungensis</i>      | 7                                | 7          | 0.014700015            | 0.013284245 |
| <i>Janthinobacterium lividum</i>        | 7                                | 11         | 0.014700015            | 0.020875242 |
| <i>Saccharopolyspora spinosa</i>        | 7                                | 8          | 0.014700015            | 0.015181994 |
| <i>Arthrobacter sp. TB 26</i>           | 7                                | 10         | 0.014700015            | 0.018977493 |

| SPECIES<br>#Taxonomy                             | Absolute abundance (gene number) |            | Relative abundance (%) |             |
|--------------------------------------------------|----------------------------------|------------|------------------------|-------------|
|                                                  | MGZ31DRh                         | MGZ31J1DRh | MGZ31DRh               | MGZ31J1DRh  |
| <i>Micromonospora sp. ATCC 39149</i>             | 7                                | 7          | 0.014700015            | 0.013284245 |
| <i>Burkholderia sp. Ch1-1</i>                    | 7                                | 7          | 0.014700015            | 0.013284245 |
| <i>Verrucomicrobia bacterium SCGC AAA164-I21</i> | 7                                | 5          | 0.014700015            | 0.009488746 |
| <i>Nonomurea coxensis</i>                        | 7                                | 8          | 0.014700015            | 0.015181994 |
| <i>Zymomonas mobilis</i>                         | 7                                | 7          | 0.014700015            | 0.013284245 |
| <i>Salinibacter ruber</i>                        | 7                                | 7          | 0.014700015            | 0.013284245 |
| <i>Mycobacterium bovis</i>                       | 7                                | 7          | 0.014700015            | 0.013284245 |
| <i>Rhodanobacter fulvus</i>                      | 7                                | 8          | 0.014700015            | 0.015181994 |
| <i>Richelia intracellularis</i>                  | 7                                | 8          | 0.014700015            | 0.015181994 |
| <i>Sphingobium lactosutens</i>                   | 7                                | 7          | 0.014700015            | 0.013284245 |
| <i>Acidovorax radicus</i>                        | 7                                | 11         | 0.014700015            | 0.020875242 |
| <i>Amycolatopsis sp. ATCC 39116</i>              | 7                                | 7          | 0.014700015            | 0.013284245 |
| <i>Polaromonas sp. JS666</i>                     | 7                                | 8          | 0.014700015            | 0.015181994 |
| <i>Klebsiella pneumoniae</i>                     | 7                                | 5          | 0.014700015            | 0.009488746 |
| <i>Streptomyces viridochromogenes</i>            | 7                                | 7          | 0.014700015            | 0.013284245 |
| <i>Salinispora pacifica</i>                      | 7                                | 7          | 0.014700015            | 0.013284245 |
| <i>Caldilinea aerophila</i>                      | 7                                | 7          | 0.014700015            | 0.013284245 |
| <i>Xylella fastidiosa</i>                        | 7                                | 6          | 0.014700015            | 0.011386496 |
| <i>Acidiphilium sp. PM</i>                       | 7                                | 7          | 0.014700015            | 0.013284245 |
| <i>Streptomyces canus</i>                        | 7                                | 8          | 0.014700015            | 0.015181994 |
| <i>Calothrix sp. PCC 7103</i>                    | 7                                | 7          | 0.014700015            | 0.013284245 |
| <i>Actinokineospora enzanensis</i>               | 7                                | 7          | 0.014700015            | 0.013284245 |
| <i>Amycolatopsis mediterranei</i>                | 7                                | 7          | 0.014700015            | 0.013284245 |

| SPECIES<br>#Taxonomy                    | Absolute abundance (gene number) |            | Relative abundance (%) |             |
|-----------------------------------------|----------------------------------|------------|------------------------|-------------|
|                                         | MGZ31DRh                         | MGZ31J1DRh | MGZ31DRh               | MGZ31J1DRh  |
| <i>Actinoplanes missouriensis</i>       | 7                                | 8          | 0.014700015            | 0.015181994 |
| <i>Sphingobium chinhatense</i>          | 7                                | 7          | 0.014700015            | 0.013284245 |
| <i>Verrucomicrobium spinosum</i>        | 7                                | 6          | 0.014700015            | 0.011386496 |
| <i>Ochrobactrum intermedium</i>         | 7                                | 8          | 0.014700015            | 0.015181994 |
| <i>Beggiatoa sp. SS</i>                 | 7                                | 8          | 0.014700015            | 0.015181994 |
| <i>Vibrio cholerae</i>                  | 7                                | 7          | 0.014700015            | 0.013284245 |
| <i>Bradyrhizobium sp. WSM471</i>        | 7                                | 7          | 0.014700015            | 0.013284245 |
| <i>Flavobacterium rivuli</i>            | 7                                | 8          | 0.014700015            | 0.015181994 |
| <i>Burkholderia sp. lig30</i>           | 7                                | 8          | 0.014700015            | 0.015181994 |
| <i>Rudanella lutea</i>                  | 7                                | 7          | 0.014700015            | 0.013284245 |
| <i>Rhodanobacter sp. 115</i>            | 7                                | 6          | 0.014700015            | 0.011386496 |
| <i>Peptoclostridium difficile</i>       | 6                                | 6          | 0.012600013            | 0.011386496 |
| <i>Burkholderia sp. WSM4176</i>         | 6                                | 5          | 0.012600013            | 0.009488746 |
| <i>Xanthomonas vasicola</i>             | 6                                | 7          | 0.012600013            | 0.013284245 |
| <i>Bradyrhizobium sp. ORS 285</i>       | 6                                | 6          | 0.012600013            | 0.011386496 |
| <i>Janibacter sp. HTCC2649</i>          | 6                                | 8          | 0.012600013            | 0.015181994 |
| <i>Rhodanobacter thiooxydans</i>        | 6                                | 7          | 0.012600013            | 0.013284245 |
| <i>Afipia felis</i>                     | 6                                | 4          | 0.012600013            | 0.007590997 |
| <i>Rubrivivax benzoatilyticus</i>       | 6                                | 7          | 0.012600013            | 0.013284245 |
| <i>Desmospora sp. 8437</i>              | 6                                | 6          | 0.012600013            | 0.011386496 |
| <i>Actinokineospora spheciospongiae</i> | 6                                | 6          | 0.012600013            | 0.011386496 |
| <i>Bacteroides xylanisolvens</i>        | 6                                | 6          | 0.012600013            | 0.011386496 |
| <i>Rhodococcus rhodochrous</i>          | 6                                | 5          | 0.012600013            | 0.009488746 |

| SPECIES<br>#Taxonomy                                 | Absolute abundance (gene number) |            | Relative abundance (%) |             |
|------------------------------------------------------|----------------------------------|------------|------------------------|-------------|
|                                                      | MGZ31DRh                         | MGZ31J1DRh | MGZ31DRh               | MGZ31J1DRh  |
| <i>Streptococcus sobrinus</i>                        | 6                                | 8          | 0.012600013            | 0.015181994 |
| <i>Desulfosporosinus youngiae</i>                    | 6                                | 7          | 0.012600013            | 0.013284245 |
| <i>Thioalkalivibrio thiocyanodenitrificans</i>       | 6                                | 6          | 0.012600013            | 0.011386496 |
| <i>Aquamicrobium defluvii</i>                        | 6                                | 5          | 0.012600013            | 0.009488746 |
| <i>Rhodovulum sp. PH10</i>                           | 6                                | 6          | 0.012600013            | 0.011386496 |
| <i>Curtobacterium sp. B18</i>                        | 6                                | 7          | 0.012600013            | 0.013284245 |
| <i>Asticcacaulis benevestitus</i>                    | 6                                | 6          | 0.012600013            | 0.011386496 |
| <i>Mesorhizobium amorphae</i>                        | 6                                | 6          | 0.012600013            | 0.011386496 |
| <i>Amycolatopsis methanolica</i>                     | 6                                | 6          | 0.012600013            | 0.011386496 |
| <i>Promicromonospora sukumoe</i>                     | 6                                | 6          | 0.012600013            | 0.011386496 |
| <i>Burkholderia graminis</i>                         | 6                                | 6          | 0.012600013            | 0.011386496 |
| <i>Methylobacterium mesophilicum</i>                 | 6                                | 5          | 0.012600013            | 0.009488746 |
| <i>alpha proteobacterium BAL199</i>                  | 6                                | 6          | 0.012600013            | 0.011386496 |
| <i>Hydrogenophaga intermedia</i>                     | 6                                | 8          | 0.012600013            | 0.015181994 |
| <i>Leptospirillum rubarum</i>                        | 6                                | 6          | 0.012600013            | 0.011386496 |
| <i>Rhizobium grahamii</i>                            | 6                                | 9          | 0.012600013            | 0.017079743 |
| <i>Brucella melitensis</i>                           | 6                                | 7          | 0.012600013            | 0.013284245 |
| <i>Microcystis aeruginosa</i>                        | 6                                | 10         | 0.012600013            | 0.018977493 |
| <i>Brucella ovis</i>                                 | 6                                | 6          | 0.012600013            | 0.011386496 |
| <i>Ruegeria mobilis</i>                              | 6                                | 10         | 0.012600013            | 0.018977493 |
| <i>Limnohabitans sp. Rim28</i>                       | 6                                | 7          | 0.012600013            | 0.013284245 |
| <i>Verrucomicrobiae bacterium DG1235</i>             | 6                                | 6          | 0.012600013            | 0.011386496 |
| <i>Marine Group I thaumarchaeote SCGC AB-629-I23</i> | 6                                | 20         | 0.012600013            | 0.037954985 |



| SPECIES<br>#Taxonomy                       | Absolute abundance (gene number) |            | Relative abundance (%) |             |
|--------------------------------------------|----------------------------------|------------|------------------------|-------------|
|                                            | MGZ31DRh                         | MGZ31J1DRh | MGZ31DRh               | MGZ31J1DRh  |
| <i>Oxalobacteraceae bacterium IMCC9480</i> | 6                                | 7          | 0.012600013            | 0.013284245 |
| <i>Thermaerobacter subterraneus</i>        | 6                                | 7          | 0.012600013            | 0.013284245 |
| <i>Streptomyces coelicoflavus</i>          | 6                                | 8          | 0.012600013            | 0.015181994 |
| <i>Nitratireductor aquibiodomus</i>        | 6                                | 5          | 0.012600013            | 0.009488746 |
| <i>Acaryochloris sp. CCMEE 5410</i>        | 6                                | 7          | 0.012600013            | 0.013284245 |
| <i>Magnetospirillum gryphiswaldense</i>    | 6                                | 5          | 0.012600013            | 0.009488746 |
| <i>Dehalobacter sp. FTH1</i>               | 6                                | 6          | 0.012600013            | 0.011386496 |
| <i>Myxococcus xanthus</i>                  | 6                                | 8          | 0.012600013            | 0.015181994 |
| <i>Streptomyces prunicolor</i>             | 6                                | 8          | 0.012600013            | 0.015181994 |
| <i>Rhodanobacter spathiphylli</i>          | 6                                | 7          | 0.012600013            | 0.013284245 |
| <i>Uliginosibacterium gangwonense</i>      | 6                                | 17         | 0.012600013            | 0.032261738 |
| <i>Actinoalloteichus spitiensis</i>        | 6                                | 6          | 0.012600013            | 0.011386496 |
| <i>Frankia sp. BMG5.23</i>                 | 6                                | 6          | 0.012600013            | 0.011386496 |
| <i>Sphingomonas sp. PAMC 26617</i>         | 6                                | 6          | 0.012600013            | 0.011386496 |
| <i>Dictyoglomus turgidum</i>               | 6                                | 6          | 0.012600013            | 0.011386496 |
| <i>Afipia sp. 1NLS2</i>                    | 6                                | 6          | 0.012600013            | 0.011386496 |
| <i>Curtobacterium sp. B8</i>               | 6                                | 6          | 0.012600013            | 0.011386496 |
| <i>Rhizobium sp. AP16</i>                  | 6                                | 7          | 0.012600013            | 0.013284245 |
| <i>Brevibacillus agri</i>                  | 6                                | 6          | 0.012600013            | 0.011386496 |
| <i>Ralstonia sp. PBA</i>                   | 6                                | 6          | 0.012600013            | 0.011386496 |
| <i>Rhizobium sp. CCGE 510</i>              | 6                                | 6          | 0.012600013            | 0.011386496 |
| <i>Schlesneria paludicola</i>              | 6                                | 6          | 0.012600013            | 0.011386496 |
| <i>Pseudomonas amygdali</i>                | 5                                | 6          | 0.010500011            | 0.011386496 |

| SPECIES<br>#Taxonomy                     | Absolute abundance (gene number) |            | Relative abundance (%) |             |
|------------------------------------------|----------------------------------|------------|------------------------|-------------|
|                                          | MGZ31DRh                         | MGZ31J1DRh | MGZ31DRh               | MGZ31J1DRh  |
| <i>Thiobacillus denitrificans</i>        | 5                                | 5          | 0.010500011            | 0.009488746 |
| <i>delta proteobacterium NaphS2</i>      | 5                                | 5          | 0.010500011            | 0.009488746 |
| <i>Methyloferula stellata</i>            | 5                                | 5          | 0.010500011            | 0.009488746 |
| <i>Rhizobium sp. PDO1-076</i>            | 5                                | 7          | 0.010500011            | 0.013284245 |
| <i>Bradyrhizobium sp. ORS 375</i>        | 5                                | 5          | 0.010500011            | 0.009488746 |
| <i>Bacteroides thetaiotaomicron</i>      | 5                                | 5          | 0.010500011            | 0.009488746 |
| <i>Komagataeibacter europaeus</i>        | 5                                | 4          | 0.010500011            | 0.007590997 |
| <i>Roseobacter phage SIO1</i>            | 5                                | 4          | 0.010500011            | 0.007590997 |
| <i>Amycolatopsis vancoresmycina</i>      | 5                                | 5          | 0.010500011            | 0.009488746 |
| <i>Actinomadura atramentaria</i>         | 5                                | 5          | 0.010500011            | 0.009488746 |
| <i>Sandarakinorhabdus limnophila</i>     | 5                                | 5          | 0.010500011            | 0.009488746 |
| <i>Methylobacterium sp. GXF4</i>         | 5                                | 5          | 0.010500011            | 0.009488746 |
| <i>Cupriavidus taiwanensis</i>           | 5                                | 4          | 0.010500011            | 0.007590997 |
| <i>Kineosphaera limosa</i>               | 5                                | 6          | 0.010500011            | 0.011386496 |
| <i>Coleofasciculus chthonoplastes</i>    | 5                                | 5          | 0.010500011            | 0.009488746 |
| <i>Plesiocystis pacifica</i>             | 5                                | 4          | 0.010500011            | 0.007590997 |
| <i>Diplorickettsia massiliensis</i>      | 5                                | 7          | 0.010500011            | 0.013284245 |
| <i>Pseudogulbenkiania ferrooxidans</i>   | 5                                | 7          | 0.010500011            | 0.013284245 |
| <i>Pseudaminobacter salicylatoxidans</i> | 5                                | 5          | 0.010500011            | 0.009488746 |
| <i>Nitrosopumilus maritimus</i>          | 5                                | 20         | 0.010500011            | 0.037954985 |
| <i>Moorea producens</i>                  | 5                                | 5          | 0.010500011            | 0.009488746 |
| <i>Duganella zoogloeooides</i>           | 5                                | 7          | 0.010500011            | 0.013284245 |
| <i>Oceanicola sp. S124</i>               | 5                                | 5          | 0.010500011            | 0.009488746 |

| SPECIES<br>#Taxonomy                            | Absolute abundance (gene number) |            | Relative abundance (%) |             |
|-------------------------------------------------|----------------------------------|------------|------------------------|-------------|
|                                                 | MGZ31DRh                         | MGZ31J1DRh | MGZ31DRh               | MGZ31J1DRh  |
| <i>Xanthomonas gardneri</i>                     | 5                                | 5          | 0.010500011            | 0.009488746 |
| <i>Amorphus coralli</i>                         | 5                                | 5          | 0.010500011            | 0.009488746 |
| <i>Microbacterium sp. B19</i>                   | 5                                | 5          | 0.010500011            | 0.009488746 |
| <i>Methylocystis rosea</i>                      | 5                                | 5          | 0.010500011            | 0.009488746 |
| <i>Sphingomonas sp. PAMC 26621</i>              | 5                                | 6          | 0.010500011            | 0.011386496 |
| <i>Xanthomonas sacchari</i>                     | 5                                | 4          | 0.010500011            | 0.007590997 |
| <i>Cyanothece sp. CCY0110</i>                   | 5                                | 5          | 0.010500011            | 0.009488746 |
| <i>Sphingobium indicum</i>                      | 5                                | 6          | 0.010500011            | 0.011386496 |
| <i>Bacillus phage G</i>                         | 5                                | 5          | 0.010500011            | 0.009488746 |
| <i>Xanthomonas arboricola</i>                   | 5                                | 6          | 0.010500011            | 0.011386496 |
| <i>Paenibacillus sp. P22</i>                    | 5                                | 5          | 0.010500011            | 0.009488746 |
| <i>Thiomonas sp. FB-6</i>                       | 5                                | 5          | 0.010500011            | 0.009488746 |
| <i>Nitrococcus mobilis</i>                      | 5                                | 5          | 0.010500011            | 0.009488746 |
| <i>Ochrobactrum sp. CDB2</i>                    | 5                                | 5          | 0.010500011            | 0.009488746 |
| <i>Burkholderia andropogonis</i>                | 5                                | 5          | 0.010500011            | 0.009488746 |
| <i>Thiobacillus thioparus</i>                   | 5                                | 7          | 0.010500011            | 0.013284245 |
| <i>Rhodococcus erythropolis</i>                 | 5                                | 6          | 0.010500011            | 0.011386496 |
| <i>Nitratireductor indicus</i>                  | 5                                | 5          | 0.010500011            | 0.009488746 |
| <i>Pseudomonas fuscovaginae</i>                 | 5                                | 5          | 0.010500011            | 0.009488746 |
| <i>Spirosoma panaciterrae</i>                   | 5                                | 6          | 0.010500011            | 0.011386496 |
| <i>SAR202 cluster bacterium SCGC AAA240-N13</i> | 5                                | 6          | 0.010500011            | 0.011386496 |
| <i>Burkholderia oklahomensis</i>                | 5                                | 5          | 0.010500011            | 0.009488746 |
| <i>Burkholderia mallei</i>                      | 5                                | 5          | 0.010500011            | 0.009488746 |

| SPECIES<br>#Taxonomy                            | Absolute abundance (gene number) |            | Relative abundance (%) |             |
|-------------------------------------------------|----------------------------------|------------|------------------------|-------------|
|                                                 | MGZ31DRh                         | MGZ31J1DRh | MGZ31DRh               | MGZ31J1DRh  |
| <i>Desulfovibrio vulgaris</i>                   | 5                                | 4          | 0.010500011            | 0.007590997 |
| <i>Acetobacter aceti</i>                        | 5                                | 5          | 0.010500011            | 0.009488746 |
| <i>Clostridium botulinum</i>                    | 5                                | 4          | 0.010500011            | 0.007590997 |
| <i>Pontibacter roseus</i>                       | 5                                | 5          | 0.010500011            | 0.009488746 |
| <i>Rhizobium etli</i>                           | 5                                | 6          | 0.010500011            | 0.011386496 |
| <i>Bordetella sp. FB-8</i>                      | 5                                | 5          | 0.010500011            | 0.009488746 |
| <i>SAR324 cluster bacterium SCGC AAA240-J09</i> | 5                                | 6          | 0.010500011            | 0.011386496 |
| <i>Yersinia enterocolitica</i>                  | 5                                | 5          | 0.010500011            | 0.009488746 |
| <i>Meiothermus timidus</i>                      | 5                                | 5          | 0.010500011            | 0.009488746 |
| <i>Mesorhizobium metallidurans</i>              | 5                                | 3          | 0.010500011            | 0.005693248 |
| <i>Streptomyces vitaminophilus</i>              | 5                                | 5          | 0.010500011            | 0.009488746 |
| <i>Phaeospirillum fulvum</i>                    | 5                                | 5          | 0.010500011            | 0.009488746 |
| <i>Synechococcus phage S-CBS4</i>               | 5                                | 7          | 0.010500011            | 0.013284245 |
| <i>Streptomyces purpureus</i>                   | 5                                | 5          | 0.010500011            | 0.009488746 |
| <i>Novosphingobium aromaticivorans</i>          | 5                                | 6          | 0.010500011            | 0.011386496 |
| <i>Brevibacillus massiliensis</i>               | 5                                | 5          | 0.010500011            | 0.009488746 |
| <i>Sinorhizobium fredii</i>                     | 5                                | 8          | 0.010500011            | 0.015181994 |
| <i>Streptomyces somaliensis</i>                 | 5                                | 5          | 0.010500011            | 0.009488746 |
| <i>Gimesia maris</i>                            | 5                                | 5          | 0.010500011            | 0.009488746 |
| <i>Desulfovibrio oxyclinae</i>                  | 4                                | 4          | 0.008400008            | 0.007590997 |
| <i>Winogradskyella sp. PG-2</i>                 | 4                                | 3          | 0.008400008            | 0.005693248 |
| <i>Achromobacter piechaudii</i>                 | 4                                | 6          | 0.008400008            | 0.011386496 |
| <i>Xanthobacter sp. 126</i>                     | 4                                | 5          | 0.008400008            | 0.009488746 |

| SPECIES<br>#Taxonomy                    | Absolute abundance (gene number) |            | Relative abundance (%) |             |
|-----------------------------------------|----------------------------------|------------|------------------------|-------------|
|                                         | MGZ31DRh                         | MGZ31J1DRh | MGZ31DRh               | MGZ31J1DRh  |
| <i>Actinomycetospora chiangmaiensis</i> | 4                                | 3          | 0.008400008            | 0.005693248 |
| <i>Nitrospina sp. SCGC AAA288-L16</i>   | 4                                | 4          | 0.008400008            | 0.007590997 |
| <i>Methyloversatilis discipulorum</i>   | 4                                | 4          | 0.008400008            | 0.007590997 |
| <i>Phage phiJL001</i>                   | 4                                | 6          | 0.008400008            | 0.011386496 |
| <i>Nocardiopsis synnemataformans</i>    | 4                                | 4          | 0.008400008            | 0.007590997 |
| <i>Rhodonellum psychrophilum</i>        | 4                                | 4          | 0.008400008            | 0.007590997 |
| <i>Burkholderia sp. JPY251</i>          | 4                                | 4          | 0.008400008            | 0.007590997 |
| <i>Hahella ganghwensis</i>              | 4                                | 4          | 0.008400008            | 0.007590997 |
| <i>Flavobacteria bacterium MS024-2A</i> | 4                                | 5          | 0.008400008            | 0.009488746 |
| <i>Brevundimonas diminuta</i>           | 4                                | 5          | 0.008400008            | 0.009488746 |
| <i>Pseudomonas nitroreducens</i>        | 4                                | 4          | 0.008400008            | 0.007590997 |
| <i>Xanthomonas campestris</i>           | 4                                | 12         | 0.008400008            | 0.022772991 |
| <i>Niabella aurantiaca</i>              | 4                                | 12         | 0.008400008            | 0.022772991 |
| <i>Pseudomonas tolaasii</i>             | 4                                | 5          | 0.008400008            | 0.009488746 |
| <i>Gordonia otitidis</i>                | 4                                | 5          | 0.008400008            | 0.009488746 |
| <i>Microbacterium yannicii</i>          | 4                                | 4          | 0.008400008            | 0.007590997 |
| <i>Bacteroides cellulosilyticus</i>     | 4                                | 5          | 0.008400008            | 0.009488746 |
| <i>Mycobacterium vaccae</i>             | 4                                | 4          | 0.008400008            | 0.007590997 |
| <i>Bordetella bronchiseptica</i>        | 4                                | 5          | 0.008400008            | 0.009488746 |
| <i>Herbaspirillum sp. YR522</i>         | 4                                | 5          | 0.008400008            | 0.009488746 |
| <i>Pseudogymnoascus destructans</i>     | 4                                | 3          | 0.008400008            | 0.005693248 |
| <i>Gordonia rhizosphaera</i>            | 4                                | 5          | 0.008400008            | 0.009488746 |
| <i>Teredinibacter turnerae</i>          | 4                                | 4          | 0.008400008            | 0.007590997 |

| SPECIES<br>#Taxonomy                         | Absolute abundance (gene number) |            | Relative abundance (%) |             |
|----------------------------------------------|----------------------------------|------------|------------------------|-------------|
|                                              | MGZ31DRh                         | MGZ31J1DRh | MGZ31DRh               | MGZ31J1DRh  |
| <i>Flavobacterium branchiophilum</i>         | 4                                | 4          | 0.008400008            | 0.007590997 |
| <i>Helicobacter pylori</i>                   | 4                                | 5          | 0.008400008            | 0.009488746 |
| <i>Sphingomonas phyllosphaerae</i>           | 4                                | 5          | 0.008400008            | 0.009488746 |
| <i>Pseudomonas taiwanensis</i>               | 4                                | 4          | 0.008400008            | 0.007590997 |
| <i>Photorhabdus temperata</i>                | 4                                | 4          | 0.008400008            | 0.007590997 |
| <i>Sphingomonas sp. ATCC 31555</i>           | 4                                | 4          | 0.008400008            | 0.007590997 |
| <i>Desulfovibrio magneticus</i>              | 4                                | 3          | 0.008400008            | 0.005693248 |
| <i>Marichromatium purpuratum</i>             | 4                                | 4          | 0.008400008            | 0.007590997 |
| <i>Amycolatopsis benzoatilytica</i>          | 4                                | 4          | 0.008400008            | 0.007590997 |
| <i>Massilia timonae</i>                      | 4                                | 4          | 0.008400008            | 0.007590997 |
| <i>Afipia broomeae</i>                       | 4                                | 5          | 0.008400008            | 0.009488746 |
| <i>Candidatus Caldiarchaeum subterraneum</i> | 4                                | 5          | 0.008400008            | 0.009488746 |
| <i>Brevibacillus sp. BC25</i>                | 4                                | 4          | 0.008400008            | 0.007590997 |
| <i>Mycobacterium smegmatis</i>               | 4                                | 4          | 0.008400008            | 0.007590997 |
| <i>Anaerophaga thermohalophila</i>           | 4                                | 4          | 0.008400008            | 0.007590997 |
| <i>Methylobacter tundripaludum</i>           | 4                                | 5          | 0.008400008            | 0.009488746 |
| <i>Thermosinus carboxydivorans</i>           | 4                                | 5          | 0.008400008            | 0.009488746 |
| <i>Bordetella holmesii</i>                   | 4                                | 5          | 0.008400008            | 0.009488746 |
| <i>Proteiniphilum acetatigenes</i>           | 4                                | 4          | 0.008400008            | 0.007590997 |
| <i>Paenibacillus alvei</i>                   | 4                                | 3          | 0.008400008            | 0.005693248 |
| <i>Candidatus Methyloirabilis oxyfera</i>    | 4                                | 5          | 0.008400008            | 0.009488746 |
| <i>Janthinobacterium sp. CG3</i>             | 4                                | 7          | 0.008400008            | 0.013284245 |
| <i>Streptomyces tsukubaensis</i>             | 4                                | 4          | 0.008400008            | 0.007590997 |

| SPECIES<br>#Taxonomy                           | Absolute abundance (gene number) |            | Relative abundance (%) |             |
|------------------------------------------------|----------------------------------|------------|------------------------|-------------|
|                                                | MGZ31DRh                         | MGZ31J1DRh | MGZ31DRh               | MGZ31J1DRh  |
| <i>Streptomyces clavuligerus</i>               | 4                                | 4          | 0.008400008            | 0.007590997 |
| <i>SAR324 cluster bacterium JCVI-SC AAA005</i> | 4                                | 6          | 0.008400008            | 0.011386496 |
| <i>Oceanicola batsensis</i>                    | 4                                | 3          | 0.008400008            | 0.005693248 |
| <i>gamma proteobacterium HTCC5015</i>          | 4                                | 4          | 0.008400008            | 0.007590997 |
| <i>Pandoraea pnomenusa</i>                     | 4                                | 6          | 0.008400008            | 0.011386496 |
| <i>Aneurinibacillus aneurinilyticus</i>        | 4                                | 5          | 0.008400008            | 0.009488746 |
| <i>Spirosoma spitsbergense</i>                 | 4                                | 4          | 0.008400008            | 0.007590997 |
| <i>Thanatephorus cucumeris</i>                 | 4                                | 4          | 0.008400008            | 0.007590997 |
| <i>Bacteroides ovatus</i>                      | 4                                | 5          | 0.008400008            | 0.009488746 |
| <i>Listeria monocytogenes</i>                  | 4                                | 8          | 0.008400008            | 0.015181994 |
| <i>Mycobacterium fortuitum</i>                 | 4                                | 3          | 0.008400008            | 0.005693248 |
| <i>Streptomyces sulphureus</i>                 | 4                                | 4          | 0.008400008            | 0.007590997 |
| <i>Lyngbya aestuarii</i>                       | 4                                | 6          | 0.008400008            | 0.011386496 |
| <i>Herbaspirillum sp. CF444</i>                | 4                                | 6          | 0.008400008            | 0.011386496 |
| <i>Streptomyces exfoliatus</i>                 | 4                                | 5          | 0.008400008            | 0.009488746 |
| <i>Erythrobacter sp. NAP1</i>                  | 4                                | 5          | 0.008400008            | 0.009488746 |
| <i>Pelosinus fermentans</i>                    | 4                                | 4          | 0.008400008            | 0.007590997 |
| <i>Arthrobacter nitrophenolicus</i>            | 4                                | 4          | 0.008400008            | 0.007590997 |
| <i>Desulfospira joergensenii</i>               | 4                                | 4          | 0.008400008            | 0.007590997 |
| <i>Treponema pedis</i>                         | 4                                | 4          | 0.008400008            | 0.007590997 |
| <i>Roseomonas cervicalis</i>                   | 4                                | 4          | 0.008400008            | 0.007590997 |
| <i>Sporomusa ovata</i>                         | 4                                | 5          | 0.008400008            | 0.009488746 |
| <i>Burkholderia sp. BT03</i>                   | 4                                | 3          | 0.008400008            | 0.005693248 |

| SPECIES<br>#Taxonomy                          | Absolute abundance (gene number) |            | Relative abundance (%) |             |
|-----------------------------------------------|----------------------------------|------------|------------------------|-------------|
|                                               | MGZ31DRh                         | MGZ31J1DRh | MGZ31DRh               | MGZ31J1DRh  |
| <i>Thauera sp. 63</i>                         | 4                                | 5          | 0.008400008            | 0.009488746 |
| <i>Gryllotalpicola ginsengisoli</i>           | 4                                | 5          | 0.008400008            | 0.009488746 |
| <i>Corynebacterium accolens</i>               | 4                                | 4          | 0.008400008            | 0.007590997 |
| <i>Rhodospirillum rubrum</i>                  | 4                                | 4          | 0.008400008            | 0.007590997 |
| <i>Nocardiopsis gilva</i>                     | 4                                | 4          | 0.008400008            | 0.007590997 |
| <i>Leptolyngbya sp. PCC 7375</i>              | 4                                | 4          | 0.008400008            | 0.007590997 |
| <i>Glaciibacter superstes</i>                 | 4                                | 4          | 0.008400008            | 0.007590997 |
| <i>Modestobacter marinus</i>                  | 4                                | 5          | 0.008400008            | 0.009488746 |
| <i>Methyloversatilis universalis</i>          | 4                                | 4          | 0.008400008            | 0.007590997 |
| <i>Chlorobium ferrooxidans</i>                | 4                                | 4          | 0.008400008            | 0.007590997 |
| <i>Burkholderia cepacia</i>                   | 4                                | 4          | 0.008400008            | 0.007590997 |
| <i>Rhodanobacter denitrificans</i>            | 4                                | 4          | 0.008400008            | 0.007590997 |
| <i>Streptomyces sp. SA3_actF</i>              | 4                                | 4          | 0.008400008            | 0.007590997 |
| <i>Desulfonatronospora thiodismutans</i>      | 4                                | 4          | 0.008400008            | 0.007590997 |
| <i>Ochrobactrum anthropi</i>                  | 4                                | 3          | 0.008400008            | 0.005693248 |
| <i>Chitiniphilus shinanonensis</i>            | 4                                | 5          | 0.008400008            | 0.009488746 |
| <i>Cupriavidus sp. UYPR2.512</i>              | 4                                | 6          | 0.008400008            | 0.011386496 |
| <i>Corynebacterium-like bacterium B27</i>     | 4                                | 6          | 0.008400008            | 0.011386496 |
| <i>Parabacteroides merdae</i>                 | 4                                | 4          | 0.008400008            | 0.007590997 |
| <i>Listeria marthii</i>                       | 4                                | 4          | 0.008400008            | 0.007590997 |
| <i>Saccharomonospora glauca</i>               | 4                                | 4          | 0.008400008            | 0.007590997 |
| <i>Bradyrhizobium sp. UPM1167</i>             | 3                                | 4          | 0.006300006            | 0.007590997 |
| <i>Pseudomonas syringae group genomosp. 3</i> | 3                                | 3          | 0.006300006            | 0.005693248 |



| SPECIES<br>#Taxonomy                             | Absolute abundance (gene number) |            | Relative abundance (%) |             |
|--------------------------------------------------|----------------------------------|------------|------------------------|-------------|
|                                                  | MGZ31DRh                         | MGZ31J1DRh | MGZ31DRh               | MGZ31J1DRh  |
| <i>Citromicrobium sp. JLT1363</i>                | 3                                | 3          | 0.006300006            | 0.005693248 |
| <i>Mycobacterium marinum</i>                     | 3                                | 3          | 0.006300006            | 0.005693248 |
| <i>Aeromonas hydrophila</i>                      | 3                                | 4          | 0.006300006            | 0.007590997 |
| <i>Dasania marina</i>                            | 3                                | 3          | 0.006300006            | 0.005693248 |
| <i>Fischerella sp. CENA19</i>                    | 3                                | 2          | 0.006300006            | 0.003795499 |
| <i>Methanothermobacter marburgensis</i>          | 3                                | 3          | 0.006300006            | 0.005693248 |
| <i>Propionibacterium avidum</i>                  | 3                                | 3          | 0.006300006            | 0.005693248 |
| <i>Sphingobium xenophagum</i>                    | 3                                | 4          | 0.006300006            | 0.007590997 |
| <i>Chlorobaculum tepidum</i>                     | 3                                | 3          | 0.006300006            | 0.005693248 |
| <i>Methylocystis sp. SC2</i>                     | 3                                | 2          | 0.006300006            | 0.003795499 |
| <i>Neisseria gonorrhoeae</i>                     | 3                                | 4          | 0.006300006            | 0.007590997 |
| <i>Caldimonas manganoxidans</i>                  | 3                                | 5          | 0.006300006            | 0.009488746 |
| <i>Anaerolinea thermophila</i>                   | 3                                | 3          | 0.006300006            | 0.005693248 |
| <i>Rhizobium sp. CF122</i>                       | 3                                | 4          | 0.006300006            | 0.007590997 |
| <i>Verrucomicrobia bacterium SCGC AAA164-E04</i> | 3                                | 4          | 0.006300006            | 0.007590997 |
| <i>Paenibacillus polymyxa</i>                    | 3                                | 3          | 0.006300006            | 0.005693248 |
| <i>gamma proteobacterium IMCC2047</i>            | 3                                | 5          | 0.006300006            | 0.009488746 |
| <i>Microscilla marina</i>                        | 3                                | 3          | 0.006300006            | 0.005693248 |
| <i>Amycolatopsis decaplanina</i>                 | 3                                | 3          | 0.006300006            | 0.005693248 |
| <i>Azoarcus sp. CIB</i>                          | 3                                | 3          | 0.006300006            | 0.005693248 |
| <i>Sinorhizobium arboris</i>                     | 3                                | 3          | 0.006300006            | 0.005693248 |
| <i>Frankia symbiont of Datisca glomerata</i>     | 3                                | 3          | 0.006300006            | 0.005693248 |
| <i>Methylacidiphilum fumariolicum</i>            | 3                                | 3          | 0.006300006            | 0.005693248 |

| SPECIES<br>#Taxonomy                   | Absolute abundance (gene number) |            | Relative abundance (%) |             |
|----------------------------------------|----------------------------------|------------|------------------------|-------------|
|                                        | MGZ31DRh                         | MGZ31J1DRh | MGZ31DRh               | MGZ31J1DRh  |
| <i>Roseovarius sp. 217</i>             | 3                                | 3          | 0.006300006            | 0.005693248 |
| <i>Methylosinus trichosporium</i>      | 3                                | 3          | 0.006300006            | 0.005693248 |
| <i>Rhodococcus phage REQ1</i>          | 3                                | 4          | 0.006300006            | 0.007590997 |
| <i>Rhodobacter capsulatus</i>          | 3                                | 3          | 0.006300006            | 0.005693248 |
| <i>Herbaspirillum frisingense</i>      | 3                                | 4          | 0.006300006            | 0.007590997 |
| <i>Lactobacillus paracasei</i>         | 3                                | 4          | 0.006300006            | 0.007590997 |
| <i>Geobacillus thermoglucosidasius</i> | 3                                | 3          | 0.006300006            | 0.005693248 |
| <i>Paenibacillus sp. HGF5</i>          | 3                                | 3          | 0.006300006            | 0.005693248 |
| <i>Methylosarcina fibrata</i>          | 3                                | 3          | 0.006300006            | 0.005693248 |
| <i>Ralstonia sp. 5_7_47FAA</i>         | 3                                | 3          | 0.006300006            | 0.005693248 |
| <i>Sphingomonas sp. SKA58</i>          | 3                                | 3          | 0.006300006            | 0.005693248 |
| <i>Streptomyces olindensis</i>         | 3                                | 4          | 0.006300006            | 0.007590997 |
| <i>Caldalkalibacillus thermarum</i>    | 3                                | 2          | 0.006300006            | 0.003795499 |
| <i>Streptomyces griseoflavus</i>       | 3                                | 4          | 0.006300006            | 0.007590997 |
| <i>Arthrobacter globiformis</i>        | 3                                | 2          | 0.006300006            | 0.003795499 |
| <i>Pseudanabaena biceps</i>            | 3                                | 2          | 0.006300006            | 0.003795499 |
| <i>Staphylococcus aureus</i>           | 3                                | 4          | 0.006300006            | 0.007590997 |
| <i>Desulfurispora thermophila</i>      | 3                                | 3          | 0.006300006            | 0.005693248 |
| <i>Advenella kashmirensis</i>          | 3                                | 3          | 0.006300006            | 0.005693248 |
| <i>Roseovarius sp. TM1035</i>          | 3                                | 3          | 0.006300006            | 0.005693248 |
| <i>Clavibacter michiganensis</i>       | 3                                | 3          | 0.006300006            | 0.005693248 |
| <i>Saccharomonospora halophila</i>     | 3                                | 3          | 0.006300006            | 0.005693248 |
| <i>Solitalea canadensis</i>            | 3                                | 2          | 0.006300006            | 0.003795499 |

| SPECIES<br>#Taxonomy                             | Absolute abundance (gene number) |            | Relative abundance (%) |             |
|--------------------------------------------------|----------------------------------|------------|------------------------|-------------|
|                                                  | MGZ31DRh                         | MGZ31J1DRh | MGZ31DRh               | MGZ31J1DRh  |
| <i>Labrenzia aggregata</i>                       | 3                                | 5          | 0.006300006            | 0.009488746 |
| <i>Arenimonas oryzae</i>                         | 3                                | 4          | 0.006300006            | 0.007590997 |
| <i>Kiloniella laminariae</i>                     | 3                                | 3          | 0.006300006            | 0.005693248 |
| <i>Gordonia phage GTE2</i>                       | 3                                |            | 0.006300006            |             |
| <i>Mycobacterium cosmeticum</i>                  | 3                                | 3          | 0.006300006            | 0.005693248 |
| <i>Corynebacterium diphtheriae</i>               | 3                                | 3          | 0.006300006            | 0.005693248 |
| <i>Yersinia similis</i>                          | 3                                | 3          | 0.006300006            | 0.005693248 |
| <i>Microbacterium sp. C448</i>                   | 3                                | 3          | 0.006300006            | 0.005693248 |
| <i>Rhodococcus sp. P14</i>                       | 3                                | 5          | 0.006300006            | 0.009488746 |
| <i>Brucella ceti</i>                             | 3                                | 3          | 0.006300006            | 0.005693248 |
| <i>Verrucomicrobia bacterium SCGC AAA164-N20</i> | 3                                | 3          | 0.006300006            | 0.005693248 |
| <i>Candidatus Korarchaeum cryptofilum</i>        | 3                                | 6          | 0.006300006            | 0.011386496 |
| <i>Rickettsia japonica</i>                       | 3                                | 3          | 0.006300006            | 0.005693248 |
| <i>Streptomyces rimosus</i>                      | 3                                | 4          | 0.006300006            | 0.007590997 |
| <i>Rhodococcus ruber</i>                         | 3                                | 3          | 0.006300006            | 0.005693248 |
| <i>Streptomyces sp. Mg1</i>                      | 3                                | 3          | 0.006300006            | 0.005693248 |
| <i>Paenibacillus sp. HGF7</i>                    | 3                                | 3          | 0.006300006            | 0.005693248 |
| <i>Sulfurihydrogenibium yellowstonense</i>       | 3                                | 5          | 0.006300006            | 0.009488746 |
| <i>Rhodopirellula baltica</i>                    | 3                                | 3          | 0.006300006            | 0.005693248 |
| <i>Serratia fonticola</i>                        | 3                                | 3          | 0.006300006            | 0.005693248 |
| <i>Candidatus Microthrix parvicella</i>          | 3                                | 5          | 0.006300006            | 0.009488746 |
| <i>Paenibacillus terrigena</i>                   | 3                                | 3          | 0.006300006            | 0.005693248 |
| <i>Deinococcus aquatilis</i>                     | 3                                | 4          | 0.006300006            | 0.007590997 |

| SPECIES<br>#Taxonomy                    | Absolute abundance (gene number) |            | Relative abundance (%) |             |
|-----------------------------------------|----------------------------------|------------|------------------------|-------------|
|                                         | MGZ31DRh                         | MGZ31J1DRh | MGZ31DRh               | MGZ31J1DRh  |
| <i>Streptomyces himastatinicus</i>      | 3                                | 3          | 0.006300006            | 0.005693248 |
| <i>Fluoribacter dumoffii</i>            | 3                                | 3          | 0.006300006            | 0.005693248 |
| <i>Methylophilus methylotrophus</i>     | 3                                | 2          | 0.006300006            | 0.003795499 |
| <i>Marinobacter manganoxydans</i>       | 3                                | 3          | 0.006300006            | 0.005693248 |
| <i>Opitutaceae bacterium TAV5</i>       | 3                                | 2          | 0.006300006            | 0.003795499 |
| <i>Actinobaculum sp. oral taxon 183</i> | 3                                | 3          | 0.006300006            | 0.005693248 |
| <i>Mariprofundus ferrooxydans</i>       | 3                                | 4          | 0.006300006            | 0.007590997 |
| <i>Elizabethkingia meningoseptica</i>   | 3                                | 2          | 0.006300006            | 0.003795499 |
| <i>Bradyrhizobium sp. S23321</i>        | 3                                | 3          | 0.006300006            | 0.005693248 |
| <i>Phenylobacterium zucineum</i>        | 3                                | 3          | 0.006300006            | 0.005693248 |
| <i>Balneola vulgaris</i>                | 3                                | 3          | 0.006300006            | 0.005693248 |
| <i>Pseudonocardia dioxanivorans</i>     | 3                                | 3          | 0.006300006            | 0.005693248 |
| <i>Effusibacillus pohliae</i>           | 3                                | 3          | 0.006300006            | 0.005693248 |
| <i>Nevskia ramosa</i>                   | 3                                | 2          | 0.006300006            | 0.003795499 |
| <i>Methylosinus sp. LW4</i>             | 3                                | 3          | 0.006300006            | 0.005693248 |
| <i>Rhodobacter sphaeroides</i>          | 3                                | 3          | 0.006300006            | 0.005693248 |
| <i>Burkholderia pyrrocinia</i>          | 3                                | 4          | 0.006300006            | 0.007590997 |
| <i>Haemophilus influenzae</i>           | 3                                | 4          | 0.006300006            | 0.007590997 |
| <i>Thermus aquaticus</i>                | 3                                | 3          | 0.006300006            | 0.005693248 |
| <i>Lewinella cohaerens</i>              | 3                                | 3          | 0.006300006            | 0.005693248 |
| <i>Anaeromusa acidaminophila</i>        | 3                                | 3          | 0.006300006            | 0.005693248 |
| <i>Caenispirillum salinarum</i>         | 3                                | 3          | 0.006300006            | 0.005693248 |
| <i>Mycobacterium rhodesiae</i>          | 3                                | 2          | 0.006300006            | 0.003795499 |

| SPECIES<br>#Taxonomy                                 | Absolute abundance (gene number) |            | Relative abundance (%) |             |
|------------------------------------------------------|----------------------------------|------------|------------------------|-------------|
|                                                      | MGZ31DRh                         | MGZ31J1DRh | MGZ31DRh               | MGZ31J1DRh  |
| <i>Candidatus Nitrosopumilus salaria</i>             | 3                                | 11         | 0.006300006            | 0.020875242 |
| <i>Coprococcus comes</i>                             | 3                                | 3          | 0.006300006            | 0.005693248 |
| <i>Rhizobium gallicum</i>                            | 3                                | 4          | 0.006300006            | 0.007590997 |
| <i>Paenibacillus elgii</i>                           | 3                                | 5          | 0.006300006            | 0.009488746 |
| <i>Methanosarcina barkeri</i>                        | 3                                | 4          | 0.006300006            | 0.007590997 |
| <i>Amycolatopsis nigrescens</i>                      | 3                                | 3          | 0.006300006            | 0.005693248 |
| <i>Methylovulum miyakonense</i>                      | 3                                | 3          | 0.006300006            | 0.005693248 |
| <i>Wolbachia endosymbiont of Drosophila simulans</i> | 3                                |            | 0.006300006            |             |
| <i>Streptomyces coelicolor</i>                       | 3                                | 3          | 0.006300006            | 0.005693248 |
| <i>Desulfovibrio sp. A2</i>                          | 3                                | 2          | 0.006300006            | 0.003795499 |
| <i>Kordiimonas gwangyangensis</i>                    | 3                                | 3          | 0.006300006            | 0.005693248 |
| <i>Janibacter hoylei</i>                             | 3                                | 3          | 0.006300006            | 0.005693248 |
| <i>marine gamma proteobacterium HTCC2148</i>         | 3                                | 3          | 0.006300006            | 0.005693248 |
| <i>Vibrio cyclitrophicus</i>                         | 3                                | 3          | 0.006300006            | 0.005693248 |
| <i>Listeria seeligeri</i>                            | 3                                | 3          | 0.006300006            | 0.005693248 |
| <i>zeta proteobacterium SCGC AB-133-C04</i>          | 3                                | 3          | 0.006300006            | 0.005693248 |
| <i>Conexibacter woesei</i>                           | 3                                | 3          | 0.006300006            | 0.005693248 |
| <i>Propionibacterium acnes</i>                       | 3                                | 5          | 0.006300006            | 0.009488746 |
| <i>Xanthomonas vesicatoria</i>                       | 3                                | 3          | 0.006300006            | 0.005693248 |
| <i>actinobacterium SCGC AAA278-I18</i>               | 3                                | 3          | 0.006300006            | 0.005693248 |
| <i>Chlamydia psittaci</i>                            | 3                                | 4          | 0.006300006            | 0.007590997 |
| <i>Brevundimonas sp. BAL3</i>                        | 3                                | 3          | 0.006300006            | 0.005693248 |
| <i>Burkholderia xenovorans</i>                       | 3                                | 3          | 0.006300006            | 0.005693248 |

| SPECIES<br>#Taxonomy                         | Absolute abundance (gene number) |            | Relative abundance (%) |             |
|----------------------------------------------|----------------------------------|------------|------------------------|-------------|
|                                              | MGZ31DRh                         | MGZ31J1DRh | MGZ31DRh               | MGZ31J1DRh  |
| <i>cyanobacterium PCC 7702</i>               | 3                                | 4          | 0.006300006            | 0.007590997 |
| <i>Roseibium sp. TrichSKD4</i>               | 3                                | 3          | 0.006300006            | 0.005693248 |
| <i>Oceanibaculum indicum</i>                 | 3                                | 5          | 0.006300006            | 0.009488746 |
| <i>Gordonia neofelifaecis</i>                | 3                                | 3          | 0.006300006            | 0.005693248 |
| <i>Macrophomina phaseolina</i>               | 3                                | 3          | 0.006300006            | 0.005693248 |
| <i>Laceyella sacchari</i>                    | 3                                | 4          | 0.006300006            | 0.007590997 |
| <i>Clostridium carboxidivorans</i>           | 3                                | 3          | 0.006300006            | 0.005693248 |
| <i>Anaerobaculum hydrogeniformans</i>        | 3                                | 4          | 0.006300006            | 0.007590997 |
| <i>Thalassobium sp. R2A62</i>                | 3                                | 3          | 0.006300006            | 0.005693248 |
| <i>Mycobacterium phlei</i>                   | 3                                | 3          | 0.006300006            | 0.005693248 |
| <i>Heliobacillus mobilis</i>                 | 3                                | 4          | 0.006300006            | 0.007590997 |
| <i>Limnohabitans sp. Rim47</i>               | 3                                | 5          | 0.006300006            | 0.009488746 |
| <i>Spirosoma luteum</i>                      | 3                                | 4          | 0.006300006            | 0.007590997 |
| <i>Oscillatoriales cyanobacterium JSC-12</i> | 3                                | 2          | 0.006300006            | 0.003795499 |
| <i>Methylobacterium nodulans</i>             | 3                                | 2          | 0.006300006            | 0.003795499 |
| <i>Microbacterium paraoxydans</i>            | 3                                | 3          | 0.006300006            | 0.005693248 |
| <i>Dietzia cinnamea</i>                      | 3                                | 4          | 0.006300006            | 0.007590997 |
| <i>Brevibacillus borstelensis</i>            | 3                                | 3          | 0.006300006            | 0.005693248 |
| <i>Cecembia lonarensis</i>                   | 3                                | 3          | 0.006300006            | 0.005693248 |
| <i>Tomitella biformata</i>                   | 3                                | 4          | 0.006300006            | 0.007590997 |
| <i>Thiothrix flexilis</i>                    | 3                                | 3          | 0.006300006            | 0.005693248 |
| <i>blood disease bacterium R229</i>          | 3                                | 4          | 0.006300006            | 0.007590997 |
| <i>Achromobacter arsenitoxydans</i>          | 3                                | 3          | 0.006300006            | 0.005693248 |

| SPECIES<br>#Taxonomy                         | Absolute abundance (gene number) |            | Relative abundance (%) |             |
|----------------------------------------------|----------------------------------|------------|------------------------|-------------|
|                                              | MGZ31DRh                         | MGZ31J1DRh | MGZ31DRh               | MGZ31J1DRh  |
| <i>Variovorax sp. HH01</i>                   | 3                                | 2          | 0.006300006            | 0.003795499 |
| <i>Mycobacterium intracellulare</i>          | 3                                | 3          | 0.006300006            | 0.005693248 |
| <i>Fulvivirga imtechensis</i>                | 3                                | 3          | 0.006300006            | 0.005693248 |
| <i>alpha proteobacterium SCGC AAA015-O19</i> | 3                                | 3          | 0.006300006            | 0.005693248 |
| <i>Burkholderia phage Bups phi1</i>          | 2                                | 2          | 0.004200004            | 0.003795499 |
| <i>Bacteroides uniformis</i>                 | 2                                | 2          | 0.004200004            | 0.003795499 |
| <i>Desulfobacter postgatei</i>               | 2                                | 2          | 0.004200004            | 0.003795499 |
| <i>Rhodopseudomonas palustris</i>            | 2                                | 2          | 0.004200004            | 0.003795499 |
| <i>Sulfobacillus thermosulfidooxidans</i>    | 2                                | 2          | 0.004200004            | 0.003795499 |
| <i>Novosphingobium sp. PP1Y</i>              | 2                                | 2          | 0.004200004            | 0.003795499 |
| <i>Clostridium beijerinckii</i>              | 2                                | 3          | 0.004200004            | 0.005693248 |
| <i>Pseudomonas sp. 2_1_26</i>                | 2                                | 3          | 0.004200004            | 0.005693248 |
| <i>Salinivibrio phage CW02</i>               | 2                                | 2          | 0.004200004            | 0.003795499 |
| <i>Streptomyces niveus</i>                   | 2                                | 2          | 0.004200004            | 0.003795499 |
| <i>Rhodoferax ferrireducens</i>              | 2                                | 3          | 0.004200004            | 0.005693248 |
| <i>Edwardsiella tarda</i>                    | 2                                | 2          | 0.004200004            | 0.003795499 |
| <i>Flexithrix dorotheae</i>                  | 2                                | 4          | 0.004200004            | 0.007590997 |
| <i>Candidatus Nanosalinarum sp. J07AB56</i>  | 2                                | 2          | 0.004200004            | 0.003795499 |
| <i>Bacteroides massiliensis</i>              | 2                                | 2          | 0.004200004            | 0.003795499 |
| <i>Synechococcus sp. JA-2-3B'a(2-13)</i>     | 2                                | 2          | 0.004200004            | 0.003795499 |
| <i>Franconibacter helveticus</i>             | 2                                | 2          | 0.004200004            | 0.003795499 |
| <i>Arthrospira platensis</i>                 | 2                                | 2          | 0.004200004            | 0.003795499 |
| <i>Verrucomicrobia bacterium LP2A</i>        | 2                                | 2          | 0.004200004            | 0.003795499 |

| SPECIES<br>#Taxonomy                     | Absolute abundance (gene number) |            | Relative abundance (%) |             |
|------------------------------------------|----------------------------------|------------|------------------------|-------------|
|                                          | MGZ31DRh                         | MGZ31J1DRh | MGZ31DRh               | MGZ31J1DRh  |
| <i>Salmonella phage FSLSP030</i>         | 2                                | 3          | 0.004200004            | 0.005693248 |
| <i>Bacillus ligniniphilus</i>            | 2                                | 2          | 0.004200004            | 0.003795499 |
| <i>Orenia marismortui</i>                | 2                                | 2          | 0.004200004            | 0.003795499 |
| <i>Pseudomonas agarici</i>               | 2                                | 3          | 0.004200004            | 0.005693248 |
| <i>Lachnospiraceae bacterium JC7</i>     | 2                                | 2          | 0.004200004            | 0.003795499 |
| <i>Ralstonia phage RSL1</i>              | 2                                |            | 0.004200004            |             |
| <i>Marteella mediterranea</i>            | 2                                | 3          | 0.004200004            | 0.005693248 |
| <i>Paenibacillus barengoltzii</i>        | 2                                | 3          | 0.004200004            | 0.005693248 |
| <i>Acidithiobacillus thiooxidans</i>     | 2                                | 2          | 0.004200004            | 0.003795499 |
| <i>Pseudomonas bauzanensis</i>           | 2                                | 2          | 0.004200004            | 0.003795499 |
| <i>Brevibacillus brevis</i>              | 2                                | 2          | 0.004200004            | 0.003795499 |
| <i>Xanthomonas fragariae</i>             | 2                                | 2          | 0.004200004            | 0.003795499 |
| <i>Rhizobium phaseoli</i>                | 2                                | 2          | 0.004200004            | 0.003795499 |
| <i>Pusillimonas noertemannii</i>         | 2                                | 3          | 0.004200004            | 0.005693248 |
| <i>Histoplasma capsulatum</i>            | 2                                | 2          | 0.004200004            | 0.003795499 |
| <i>actinobacterium SCGC AAA015-D07</i>   | 2                                | 2          | 0.004200004            | 0.003795499 |
| <i>Faecalitalea cylindroides</i>         | 2                                | 2          | 0.004200004            | 0.003795499 |
| <i>Streptomyces sp. SPB74</i>            | 2                                |            | 0.004200004            |             |
| <i>Aestuariiimicrobium kwangyangense</i> | 2                                | 2          | 0.004200004            | 0.003795499 |
| <i>Methylohalobius crimeensis</i>        | 2                                | 4          | 0.004200004            | 0.007590997 |
| <i>Halococcus saccharolyticus</i>        | 2                                | 2          | 0.004200004            | 0.003795499 |
| <i>Draconibacterium orientale</i>        | 2                                | 2          | 0.004200004            | 0.003795499 |
| <i>Thauera linaloolentis</i>             | 2                                | 2          | 0.004200004            | 0.003795499 |



| SPECIES<br>#Taxonomy                        | Absolute abundance (gene number) |            | Relative abundance (%) |             |
|---------------------------------------------|----------------------------------|------------|------------------------|-------------|
|                                             | MGZ31DRh                         | MGZ31J1DRh | MGZ31DRh               | MGZ31J1DRh  |
| <i>Saccharomyces cerevisiae</i>             | 2                                | 2          | 0.004200004            | 0.003795499 |
| <i>Amycolatopsis rifamycinica</i>           | 2                                | 3          | 0.004200004            | 0.005693248 |
| <i>Saprospira grandis</i>                   | 2                                | 2          | 0.004200004            | 0.003795499 |
| <i>Streptomyces acidiscabies</i>            | 2                                | 2          | 0.004200004            | 0.003795499 |
| <i>actinobacterium SCGC AAA027-L06</i>      | 2                                | 2          | 0.004200004            | 0.003795499 |
| <i>Burkholderia sp. Y123</i>                | 2                                | 2          | 0.004200004            | 0.003795499 |
| <i>Candidatus Nitrosoarchaeum koreensis</i> | 2                                | 11         | 0.004200004            | 0.020875242 |
| <i>Gordonia araii</i>                       | 2                                | 2          | 0.004200004            | 0.003795499 |
| <i>Mesorhizobium opportunistum</i>          | 2                                | 2          | 0.004200004            | 0.003795499 |
| <i>Treponema maltophilum</i>                | 2                                | 2          | 0.004200004            | 0.003795499 |
| <i>Aquifex aeolicus</i>                     | 2                                | 2          | 0.004200004            | 0.003795499 |
| <i>Hydrocarboniphaga effusa</i>             | 2                                | 2          | 0.004200004            | 0.003795499 |
| <i>Novispirillum itersonii</i>              | 2                                | 2          | 0.004200004            | 0.003795499 |
| <i>Burkholderia ambifaria</i>               | 2                                | 2          | 0.004200004            | 0.003795499 |
| <i>Streptomyces chartreusis</i>             | 2                                | 2          | 0.004200004            | 0.003795499 |
| <i>Streptomyces albus</i>                   | 2                                | 2          | 0.004200004            | 0.003795499 |
| <i>Pseudomonas chlororaphis</i>             | 2                                | 2          | 0.004200004            | 0.003795499 |
| <i>EBPR siphovirus 2</i>                    | 2                                | 2          | 0.004200004            | 0.003795499 |
| <i>Henriciella marina</i>                   | 2                                | 2          | 0.004200004            | 0.003795499 |
| <i>Burkholderia sp. RPE64</i>               | 2                                |            | 0.004200004            |             |
| <i>Butyrivibrio fibrisolvens</i>            | 2                                | 2          | 0.004200004            | 0.003795499 |
| <i>Bradyrhizobium sp. BTAi1</i>             | 2                                | 2          | 0.004200004            | 0.003795499 |
| <i>Lamprocystis purpurea</i>                | 2                                | 2          | 0.004200004            | 0.003795499 |

| SPECIES<br>#Taxonomy                    | Absolute abundance (gene number) |            | Relative abundance (%) |             |
|-----------------------------------------|----------------------------------|------------|------------------------|-------------|
|                                         | MGZ31DRh                         | MGZ31J1DRh | MGZ31DRh               | MGZ31J1DRh  |
| <i>Phaeospirillum molischianum</i>      | 2                                | 2          | 0.004200004            | 0.003795499 |
| <i>Gardnerella vaginalis</i>            | 2                                | 2          | 0.004200004            | 0.003795499 |
| <i>Pseudomonas sp. GM80</i>             | 2                                | 2          | 0.004200004            | 0.003795499 |
| <i>Thermaerobacter marianensis</i>      | 2                                | 2          | 0.004200004            | 0.003795499 |
| <i>Salsuginibacillus kocurii</i>        | 2                                | 2          | 0.004200004            | 0.003795499 |
| <i>Legionella pneumophila</i>           | 2                                | 3          | 0.004200004            | 0.005693248 |
| <i>Rhizobium phage 16-3</i>             | 2                                | 2          | 0.004200004            | 0.003795499 |
| <i>Enterobacter aerogenes</i>           | 2                                | 2          | 0.004200004            | 0.003795499 |
| <i>Ruminococcus flavefaciens</i>        | 2                                |            | 0.004200004            |             |
| <i>Granulibacter bethesdensis</i>       | 2                                | 2          | 0.004200004            | 0.003795499 |
| <i>Rhizobium sp. CF142</i>              | 2                                | 2          | 0.004200004            | 0.003795499 |
| <i>Rhodococcus sp. JVH1</i>             | 2                                | 2          | 0.004200004            | 0.003795499 |
| <i>Sphingobium sp. SYK-6</i>            | 2                                | 2          | 0.004200004            | 0.003795499 |
| <i>Haloquadratum walsbyi</i>            | 2                                | 3          | 0.004200004            | 0.005693248 |
| <i>Nocardiopsis prasina</i>             | 2                                | 2          | 0.004200004            | 0.003795499 |
| <i>Halococcus salifodinae</i>           | 2                                | 2          | 0.004200004            | 0.003795499 |
| <i>Candidatus Arthromitus sp. SFB-3</i> | 2                                | 2          | 0.004200004            | 0.003795499 |
| <i>Nitrospirillum amazonense</i>        | 2                                | 4          | 0.004200004            | 0.007590997 |
| <i>Vibrio nigripulchritudo</i>          | 2                                | 2          | 0.004200004            | 0.003795499 |
| <i>Thermus oshimai</i>                  | 2                                | 2          | 0.004200004            | 0.003795499 |
| <i>Halalkalicoccus jeotgali</i>         | 2                                | 2          | 0.004200004            | 0.003795499 |
| <i>Vibrio genomosp. F6</i>              | 2                                | 2          | 0.004200004            | 0.003795499 |
| <i>Salinicoccus albus</i>               | 2                                | 2          | 0.004200004            | 0.003795499 |

| SPECIES<br>#Taxonomy                     | Absolute abundance (gene number) |            | Relative abundance (%) |             |
|------------------------------------------|----------------------------------|------------|------------------------|-------------|
|                                          | MGZ31DRh                         | MGZ31J1DRh | MGZ31DRh               | MGZ31J1DRh  |
| <i>Bdellovibrio bacteriovorus</i>        | 2                                | 2          | 0.004200004            | 0.003795499 |
| <i>Pleurocapsa sp. PCC 7319</i>          | 2                                | 2          | 0.004200004            | 0.003795499 |
| <i>Halomonas anticariensis</i>           | 2                                | 3          | 0.004200004            | 0.005693248 |
| <i>Bacillus smithii</i>                  | 2                                | 2          | 0.004200004            | 0.003795499 |
| <i>Methylobacterium sp. MB200</i>        | 2                                | 3          | 0.004200004            | 0.005693248 |
| <i>Pseudomonas monteilii</i>             | 2                                |            | 0.004200004            |             |
| <i>Gordonia effusa</i>                   | 2                                | 3          | 0.004200004            | 0.005693248 |
| <i>Bradyrhizobiaceae bacterium SG-6C</i> | 2                                | 2          | 0.004200004            | 0.003795499 |
| <i>Chitinophaga pinensis</i>             | 2                                | 2          | 0.004200004            | 0.003795499 |
| <i>Piscirickettsia salmonis</i>          | 2                                | 2          | 0.004200004            | 0.003795499 |
| <i>Desulfovibrio africanus</i>           | 2                                | 3          | 0.004200004            | 0.005693248 |
| <i>Anabaena sp. PCC 7108</i>             | 2                                | 2          | 0.004200004            | 0.003795499 |
| <i>Alcaligenes sp. HPC1271</i>           | 2                                | 2          | 0.004200004            | 0.003795499 |
| <i>Methylobacter marinus</i>             | 2                                | 2          | 0.004200004            | 0.003795499 |
| <i>Bradyrhizobium sp. STM 3809</i>       | 2                                | 4          | 0.004200004            | 0.007590997 |
| <i>Halostagnicola larsenii</i>           | 2                                | 2          | 0.004200004            | 0.003795499 |
| <i>Xenococcus sp. PCC 7305</i>           | 2                                | 3          | 0.004200004            | 0.005693248 |
| <i>Mycobacterium parascrofulaceum</i>    | 2                                | 3          | 0.004200004            | 0.005693248 |
| <i>Desulfovibrio fructosivorans</i>      | 2                                | 2          | 0.004200004            | 0.003795499 |
| <i>Ruegeria sp. PR1b</i>                 | 2                                | 2          | 0.004200004            | 0.003795499 |
| <i>Wolinella succinogenes</i>            | 2                                | 2          | 0.004200004            | 0.003795499 |
| <i>Pseudomonas sp. GM50</i>              | 2                                | 2          | 0.004200004            | 0.003795499 |
| <i>Streptomyces griseoaurantiacus</i>    | 2                                | 2          | 0.004200004            | 0.003795499 |

| SPECIES<br>#Taxonomy                        | Absolute abundance (gene number) |            | Relative abundance (%) |             |
|---------------------------------------------|----------------------------------|------------|------------------------|-------------|
|                                             | MGZ31DRh                         | MGZ31J1DRh | MGZ31DRh               | MGZ31J1DRh  |
| <i>Alcanivorax hongdengensis</i>            | 2                                | 2          | 0.004200004            | 0.003795499 |
| <i>Bacteroides eggertii</i>                 | 2                                | 3          | 0.004200004            | 0.005693248 |
| <i>Indibacter alkaliphilus</i>              | 2                                | 2          | 0.004200004            | 0.003795499 |
| <i>Salinispora tropica</i>                  | 2                                | 2          | 0.004200004            | 0.003795499 |
| <i>Oceanibulbus indolifex</i>               | 2                                | 3          | 0.004200004            | 0.005693248 |
| <i>Brucella canis</i>                       | 2                                | 3          | 0.004200004            | 0.005693248 |
| <i>zeta proteobacterium SCGC AB-137-C09</i> | 2                                | 2          | 0.004200004            | 0.003795499 |
| <i>Rhodococcus imtechensis</i>              | 2                                | 2          | 0.004200004            | 0.003795499 |
| <i>Aciduliprofundum boonei</i>              | 2                                | 2          | 0.004200004            | 0.003795499 |
| <i>Candidatus Odysella thessalonicensis</i> | 2                                | 2          | 0.004200004            | 0.003795499 |
| <i>Xanthomonas translucens</i>              | 2                                | 3          | 0.004200004            | 0.005693248 |
| <i>Pedobacter heparinus</i>                 | 2                                | 2          | 0.004200004            | 0.003795499 |
| <i>Echinicola pacifica</i>                  | 2                                | 2          | 0.004200004            | 0.003795499 |
| <i>Mycobacterium iranicum</i>               | 2                                | 2          | 0.004200004            | 0.003795499 |
| <i>Bartonella tamiae</i>                    | 2                                | 2          | 0.004200004            | 0.003795499 |
| <i>Nitrosopumilus sp. AR</i>                | 2                                | 2          | 0.004200004            | 0.003795499 |
| <i>Bacillus firmus</i>                      | 2                                | 2          | 0.004200004            | 0.003795499 |
| <i>Shigella flexneri</i>                    | 2                                | 3          | 0.004200004            | 0.005693248 |
| <i>Clostridium sp.</i>                      | 2                                | 2          | 0.004200004            | 0.003795499 |
| <i>Candidatus Arthromitus sp. SFB-1</i>     | 2                                | 2          | 0.004200004            | 0.003795499 |
| <i>Dermacoccus sp. Ellin185</i>             | 2                                | 2          | 0.004200004            | 0.003795499 |
| <i>Herminiimonas arsenicoxydans</i>         | 2                                | 2          | 0.004200004            | 0.003795499 |
| <i>Micrococcus luteus</i>                   | 2                                | 3          | 0.004200004            | 0.005693248 |

| SPECIES<br>#Taxonomy                      | Absolute abundance (gene number) |            | Relative abundance (%) |             |
|-------------------------------------------|----------------------------------|------------|------------------------|-------------|
|                                           | MGZ31DRh                         | MGZ31J1DRh | MGZ31DRh               | MGZ31J1DRh  |
| <i>Thiothrix nivea</i>                    | 2                                | 3          | 0.004200004            | 0.005693248 |
| <i>Nocardia brasiliensis</i>              | 2                                | 2          | 0.004200004            | 0.003795499 |
| <i>Asticcacaulis biprosthecium</i>        | 2                                | 2          | 0.004200004            | 0.003795499 |
| <i>Streptomyces phage phiSASD1</i>        | 2                                | 2          | 0.004200004            | 0.003795499 |
| <i>Streptomyces gancidicus</i>            | 2                                | 2          | 0.004200004            | 0.003795499 |
| <i>Rhizobium mesoamericanum</i>           | 2                                |            | 0.004200004            |             |
| <i>Pseudomonas phage vB_Pae-Kakheti25</i> | 2                                | 2          | 0.004200004            | 0.003795499 |
| <i>Vibrio tubiashii</i>                   | 2                                | 2          | 0.004200004            | 0.003795499 |
| <i>Hymenobacter aerophilus</i>            | 2                                | 2          | 0.004200004            | 0.003795499 |
| <i>Agromyces italicus</i>                 | 2                                | 2          | 0.004200004            | 0.003795499 |
| <i>Gluconacetobacter diazotrophicus</i>   | 2                                | 2          | 0.004200004            | 0.003795499 |
| <i>Blastopirellula marina</i>             | 2                                | 3          | 0.004200004            | 0.005693248 |
| <i>Desulfovibrio sp. X2</i>               | 2                                | 3          | 0.004200004            | 0.005693248 |
| <i>Pseudomonas thermotolerans</i>         | 2                                | 3          | 0.004200004            | 0.005693248 |
| <i>Brucella pinnipedialis</i>             | 2                                | 2          | 0.004200004            | 0.003795499 |
| <i>Halomonas lutea</i>                    | 2                                | 2          | 0.004200004            | 0.003795499 |
| <i>Segniliparus rugosus</i>               | 2                                | 2          | 0.004200004            | 0.003795499 |
| <i>Paraprevotella clara</i>               | 2                                | 2          | 0.004200004            | 0.003795499 |
| <i>Sciscionella marina</i>                | 2                                | 2          | 0.004200004            | 0.003795499 |
| <i>Enterobacter phage Enc34</i>           | 2                                | 2          | 0.004200004            | 0.003795499 |
| <i>Gordonia sputi</i>                     | 2                                | 2          | 0.004200004            | 0.003795499 |
| <i>Desulfobacterium sp. AK1</i>           | 2                                | 2          | 0.004200004            | 0.003795499 |
| <i>Comamonas sp. B-9</i>                  | 2                                | 2          | 0.004200004            | 0.003795499 |

| SPECIES<br>#Taxonomy                        | Absolute abundance (gene number) |            | Relative abundance (%) |             |
|---------------------------------------------|----------------------------------|------------|------------------------|-------------|
|                                             | MGZ31DRh                         | MGZ31J1DRh | MGZ31DRh               | MGZ31J1DRh  |
| <i>Acidovorax sp. NO-1</i>                  | 2                                | 7          | 0.004200004            | 0.013284245 |
| <i>Vibrio genomosp. F10</i>                 | 2                                |            | 0.004200004            |             |
| <i>Rhodothermus marinus</i>                 | 2                                | 2          | 0.004200004            | 0.003795499 |
| <i>SAR86 cluster bacterium SAR86B</i>       | 2                                | 2          | 0.004200004            | 0.003795499 |
| <i>Mycobacterium triplex</i>                | 2                                | 2          | 0.004200004            | 0.003795499 |
| <i>Neisseria elongata</i>                   | 2                                | 2          | 0.004200004            | 0.003795499 |
| <i>Amycolatopsis balhimycina</i>            | 2                                | 2          | 0.004200004            | 0.003795499 |
| <i>Amycolatopsis halophila</i>              | 2                                | 2          | 0.004200004            | 0.003795499 |
| <i>Pseudomonas pseudoalcaligenes</i>        | 2                                | 4          | 0.004200004            | 0.007590997 |
| <i>Phyllobacterium sp. YR531</i>            | 2                                |            | 0.004200004            |             |
| <i>Natronococcus occultus</i>               | 2                                | 2          | 0.004200004            | 0.003795499 |
| <i>Nodularia spumigena</i>                  | 2                                | 2          | 0.004200004            | 0.003795499 |
| <i>Loktanella phage pCB2051-A</i>           | 2                                | 2          | 0.004200004            | 0.003795499 |
| <i>zeta proteobacterium SCGC AB-604-B04</i> | 2                                | 2          | 0.004200004            | 0.003795499 |
| <i>Coprothermobacter platensis</i>          | 2                                | 2          | 0.004200004            | 0.003795499 |
| <i>Streptomyces sp. W75</i>                 | 2                                |            | 0.004200004            |             |
| <i>Mycobacterium vulneris</i>               | 2                                | 2          | 0.004200004            | 0.003795499 |
| <i>Aquimarina agarilytica</i>               | 2                                | 2          | 0.004200004            | 0.003795499 |
| <i>Caldanaerobacter subterraneus</i>        | 2                                | 6          | 0.004200004            | 0.011386496 |
| <i>Halogranum salarium</i>                  | 2                                | 2          | 0.004200004            | 0.003795499 |
| <i>Rhodococcus equi</i>                     | 2                                | 3          | 0.004200004            | 0.005693248 |
| <i>Cupriavidus necator</i>                  | 2                                | 2          | 0.004200004            | 0.003795499 |
| <i>Pasteurella multocida</i>                | 2                                | 5          | 0.004200004            | 0.009488746 |

| SPECIES<br>#Taxonomy                         | Absolute abundance (gene number) |            | Relative abundance (%) |             |
|----------------------------------------------|----------------------------------|------------|------------------------|-------------|
|                                              | MGZ31DRh                         | MGZ31J1DRh | MGZ31DRh               | MGZ31J1DRh  |
| <i>Hoeflea phototrophica</i>                 | 2                                | 2          | 0.004200004            | 0.003795499 |
| <i>Acinetobacter johnsonii</i>               | 2                                | 2          | 0.004200004            | 0.003795499 |
| <i>Capronia coronata</i>                     | 2                                | 2          | 0.004200004            | 0.003795499 |
| <i>Elioraea tepidiphila</i>                  | 2                                | 2          | 0.004200004            | 0.003795499 |
| <i>Rubrobacter xylanophilus</i>              | 2                                | 2          | 0.004200004            | 0.003795499 |
| <i>Nakamurella multipartita</i>              | 2                                | 2          | 0.004200004            | 0.003795499 |
| <i>Rhodopirellula sp. SWK7</i>               | 2                                | 2          | 0.004200004            | 0.003795499 |
| <i>Burkholderia sp. A1</i>                   | 2                                | 2          | 0.004200004            | 0.003795499 |
| <i>[Clostridium] asparagiforme</i>           | 2                                | 2          | 0.004200004            | 0.003795499 |
| <i>marine gamma proteobacterium HTCC2143</i> | 2                                | 2          | 0.004200004            | 0.003795499 |
| <i>Thermocrinis ruber</i>                    | 2                                | 2          | 0.004200004            | 0.003795499 |
| <i>Streptomyces carzinostaticus</i>          | 2                                | 2          | 0.004200004            | 0.003795499 |
| <i>Desulfobacter curvatus</i>                | 2                                | 2          | 0.004200004            | 0.003795499 |
| <i>Nesterenkonia alba</i>                    | 2                                | 2          | 0.004200004            | 0.003795499 |
| <i>Thermotoga maritima</i>                   | 2                                | 4          | 0.004200004            | 0.007590997 |
| <i>Marinobacter sp. ELB17</i>                | 2                                | 2          | 0.004200004            | 0.003795499 |
| <i>Pseudomonas amyloclavata</i>              | 2                                | 2          | 0.004200004            | 0.003795499 |
| <i>Fischerella thermalis</i>                 | 2                                | 2          | 0.004200004            | 0.003795499 |
| <i>alpha proteobacterium SCGC AAA015-N04</i> | 2                                | 2          | 0.004200004            | 0.003795499 |
| <i>Gordonia namibiensis</i>                  | 2                                | 2          | 0.004200004            | 0.003795499 |
| <i>Bifidobacterium adolescentis</i>          | 2                                |            | 0.004200004            |             |
| <i>Rhodobacterales bacterium Y4I</i>         | 2                                | 2          | 0.004200004            | 0.003795499 |
| <i>Methylophilales phage HIM624-A</i>        | 2                                | 2          | 0.004200004            | 0.003795499 |

| SPECIES<br>#Taxonomy                   | Absolute abundance (gene number) |            | Relative abundance (%) |             |
|----------------------------------------|----------------------------------|------------|------------------------|-------------|
|                                        | MGZ31DRh                         | MGZ31J1DRh | MGZ31DRh               | MGZ31J1DRh  |
| <i>Oxalobacter formigenes</i>          | 2                                | 2          | 0.004200004            | 0.003795499 |
| <i>Mobilicoccus pelagius</i>           | 2                                | 2          | 0.004200004            | 0.003795499 |
| <i>Algoriphagus machipongonensis</i>   | 2                                | 2          | 0.004200004            | 0.003795499 |
| <i>Pseudomonas fragi</i>               | 2                                | 2          | 0.004200004            | 0.003795499 |
| <i>Leucothrix mucor</i>                | 2                                | 2          | 0.004200004            | 0.003795499 |
| <i>Streptomyces sp. SPB78</i>          | 2                                | 2          | 0.004200004            | 0.003795499 |
| <i>Nonomuraea sp. ATCC 39727</i>       | 2                                | 2          | 0.004200004            | 0.003795499 |
| <i>Thioalkalivibrio paradoxus</i>      | 2                                | 2          | 0.004200004            | 0.003795499 |
| <i>Geminocystis herdmanii</i>          | 2                                | 2          | 0.004200004            | 0.003795499 |
| <i>Thermobaculum terrenum</i>          | 2                                | 2          | 0.004200004            | 0.003795499 |
| <i>Rhizobium giardinii</i>             | 2                                | 2          | 0.004200004            | 0.003795499 |
| <i>Rhizobium sp. CF080</i>             | 2                                | 3          | 0.004200004            | 0.005693248 |
| <i>Streptomyces mobaraensis</i>        | 2                                | 2          | 0.004200004            | 0.003795499 |
| <i>Microcoleus vaginatus</i>           | 2                                | 2          | 0.004200004            | 0.003795499 |
| <i>Ornithinimicrobium pekingense</i>   | 2                                | 2          | 0.004200004            | 0.003795499 |
| <i>Clostridium sp. ASF502</i>          | 2                                | 2          | 0.004200004            | 0.003795499 |
| <i>Saccharomonospora xinjiangensis</i> | 2                                |            | 0.004200004            |             |
| <i>Salisaeta longa</i>                 | 2                                | 3          | 0.004200004            | 0.005693248 |
| <i>Sphingobium japonicum</i>           | 2                                | 4          | 0.004200004            | 0.007590997 |
| <i>Methanohalobium evestigatum</i>     | 2                                | 2          | 0.004200004            | 0.003795499 |
| <i>Candidatus Sulcia muelleri</i>      | 2                                | 2          | 0.004200004            | 0.003795499 |
| <i>Pseudoxanthomonas suwonensis</i>    | 2                                | 3          | 0.004200004            | 0.005693248 |
| <i>Burkholderia sp. SJ98</i>           | 2                                | 2          | 0.004200004            | 0.003795499 |



| SPECIES<br>#Taxonomy                            | Absolute abundance (gene number) |            | Relative abundance (%) |             |
|-------------------------------------------------|----------------------------------|------------|------------------------|-------------|
|                                                 | MGZ31DRh                         | MGZ31J1DRh | MGZ31DRh               | MGZ31J1DRh  |
| <i>Rhodococcus phage REQ2</i>                   | 2                                |            | 0.004200004            |             |
| <i>Brevibacillus panacihumi</i>                 | 2                                | 2          | 0.004200004            | 0.003795499 |
| <i>Porphyromonas gingivalis</i>                 | 2                                | 3          | 0.004200004            | 0.005693248 |
| <i>Prevotella oris</i>                          | 2                                | 2          | 0.004200004            | 0.003795499 |
| <i>Bacillus sp. 2_A_57_CT2</i>                  | 2                                | 2          | 0.004200004            | 0.003795499 |
| <i>butyrate-producing bacterium SM4/1</i>       | 2                                | 2          | 0.004200004            | 0.003795499 |
| <i>Methylococcus capsulatus</i>                 | 2                                | 5          | 0.004200004            | 0.009488746 |
| <i>Fodinicurvata sediminis</i>                  | 2                                | 2          | 0.004200004            | 0.003795499 |
| <i>Gillisia limnaea</i>                         | 2                                | 2          | 0.004200004            | 0.003795499 |
| <i>Asaia sp. SF2.1</i>                          | 2                                | 2          | 0.004200004            | 0.003795499 |
| <i>alpha proteobacterium SCGC AAA027-J10</i>    | 2                                | 2          | 0.004200004            | 0.003795499 |
| <i>Virgibacillus halodenitrificans</i>          | 2                                | 2          | 0.004200004            | 0.003795499 |
| <i>Comamonas badia</i>                          | 2                                | 2          | 0.004200004            | 0.003795499 |
| <i>Chryseobacterium gleum</i>                   | 2                                | 2          | 0.004200004            | 0.003795499 |
| <i>Nocardiopsis halotolerans</i>                | 2                                | 2          | 0.004200004            | 0.003795499 |
| <i>Ralstonia sp. 5_2_56FAA</i>                  | 2                                | 2          | 0.004200004            | 0.003795499 |
| <i>Xanthobacter autotrophicus</i>               | 2                                |            | 0.004200004            |             |
| <i>Desulfosporosinus acidiphilus</i>            | 2                                | 2          | 0.004200004            | 0.003795499 |
| <i>Streptomyces sp. Tu6071</i>                  | 2                                | 2          | 0.004200004            | 0.003795499 |
| <i>Pseudomonas plecoglossicida</i>              | 2                                | 2          | 0.004200004            | 0.003795499 |
| <i>SAR324 cluster bacterium SCGC AAA001-C10</i> | 2                                | 2          | 0.004200004            | 0.003795499 |
| <i>Cohnella laeviribosi</i>                     | 2                                | 2          | 0.004200004            | 0.003795499 |
| <i>zeta proteobacterium SCGC AB-137-J06</i>     | 2                                | 2          | 0.004200004            | 0.003795499 |

| SPECIES<br>#Taxonomy                        | Absolute abundance (gene number) |            | Relative abundance (%) |             |
|---------------------------------------------|----------------------------------|------------|------------------------|-------------|
|                                             | MGZ31DRh                         | MGZ31J1DRh | MGZ31DRh               | MGZ31J1DRh  |
| <i>Nocardiopsis xinjiangensis</i>           | 2                                | 2          | 0.004200004            | 0.003795499 |
| <i>Salinisphaera shabanensis</i>            | 2                                | 3          | 0.004200004            | 0.005693248 |
| <i>Roseobacter sp. GAI101</i>               | 2                                |            | 0.004200004            |             |
| <i>Mastigocladopsis repens</i>              | 2                                | 3          | 0.004200004            | 0.005693248 |
| <i>Coxiella burnetii</i>                    | 2                                |            | 0.004200004            |             |
| <i>Hungatella hathewayi</i>                 | 2                                | 2          | 0.004200004            | 0.003795499 |
| <i>Pantoea sp. GM01</i>                     | 2                                | 2          | 0.004200004            | 0.003795499 |
| <i>Desulfosporosinus sp. OT</i>             | 2                                | 2          | 0.004200004            | 0.003795499 |
| <i>Herbaspirillum rubrisubalbicans</i>      | 2                                | 2          | 0.004200004            | 0.003795499 |
| <i>Sphingobium sp. HDIP04</i>               | 2                                | 2          | 0.004200004            | 0.003795499 |
| <i>Methylocystis parvus</i>                 | 2                                | 2          | 0.004200004            | 0.003795499 |
| <i>Methanobacterium formicicum</i>          | 2                                | 2          | 0.004200004            | 0.003795499 |
| <i>Verrucomicrobium sp. 3C</i>              | 2                                | 2          | 0.004200004            | 0.003795499 |
| <i>Mesoflavibacter zeaxanthinifaciens</i>   | 2                                | 2          | 0.004200004            | 0.003795499 |
| <i>Chloroflexi bacterium oral taxon 439</i> | 2                                | 2          | 0.004200004            | 0.003795499 |
| <i>Brachymonas chironomi</i>                | 2                                | 2          | 0.004200004            | 0.003795499 |
| SUM                                         | 47032                            | 51901      | 98.76729871            | 98.49508495 |

**Table S13. Relative abundance of major taxons at different classification level in the rhizosphere soil based on gene number versus species abundance.**

| Relative abundances of major kingdoms in the rhizosphere soil |                                                   |            |                                                         |            |
|---------------------------------------------------------------|---------------------------------------------------|------------|---------------------------------------------------------|------------|
| Major taxonomic groups                                        | Relative abundances (%)                           |            |                                                         |            |
|                                                               | assembled by SOAPdenovo2 according to gene number |            | assembled by SOAPdenovo2 according to Species abundance |            |
|                                                               | MGZ31DRh                                          | MGZ31J1DRh | MGZ31DRh                                                | MGZ31J1DRh |
| <b>Kingdom</b>                                                |                                                   |            |                                                         |            |
| <b>Bacteria</b> <sup>1</sup>                                  | 63.407 <sup>3</sup>                               | 60.933     | 84.338                                                  | 79.097     |
| Unclassified                                                  | 14.336                                            | 14.531     | 14.726                                                  | 18.634     |
| <i>Fungi</i>                                                  | 0.134                                             | 0.131      | 0.070                                                   | 0.105      |
| <i>Viruses</i>                                                | 0.378                                             | 0.366      | 0.739                                                   | 0.925      |
| <b>Archaea</b> <sup>2</sup>                                   | 0.540                                             | 1.048      | 0.127                                                   | 1.240      |

<sup>1</sup> Table cells filled with green color indicated that the relative abundances of those taxons in MGZ31DRh were higher than those in MGZ31J1DRh using two methods.

<sup>2</sup> Table cells filled with yellow color indicated that the relative abundances of those taxons in MGZ31DRh were lower than those in MGZ31J1DRh using two methods.

<sup>3</sup> Those digits with red color indicated that the relative abundance of the taxon in one sample was higher than that of the other sample.

| Relative abundances of major phyla in the rhizosphere soil |                                                   |            |                                                         |            |
|------------------------------------------------------------|---------------------------------------------------|------------|---------------------------------------------------------|------------|
| Major taxonomic groups                                     | Relative abundances (%)                           |            |                                                         |            |
|                                                            | Assembled by SOAPdenovo2 according to gene number |            | assembled by SOAPdenovo2 according to Species abundance |            |
|                                                            | MGZ31DRh                                          | MGZ31J1DRh | MGZ31DRh                                                | MGZ31J1DRh |
| Phylum                                                     |                                                   |            |                                                         |            |
| <i>Proteobacteria</i> <sup>1</sup>                         | 38.558 <sup>3</sup>                               | 36.511     | 65.403                                                  | 46.176     |
| Unclassified                                               | 19.564                                            | 19.833     | 18.001                                                  | 24.870     |
| <i>Actinobacteria</i>                                      | 7.579                                             | 7.2646     | 9.833                                                   | 14.542     |
| <i>Firmicutes</i> <sup>2</sup>                             | 1.277                                             | 1.340      | 0.621                                                   | 1.336      |
| <i>Bacteroidetes</i>                                       | 4.351                                             | 4.1921     | 2.461                                                   | 4.690      |
| <i>Gemmatimonadetes</i>                                    | 2.745                                             | 2.663      | 1.542                                                   | 2.930      |
| <i>Ascomycota</i>                                          | 0.103                                             | 0.197      | 0.052                                                   | 0.074      |
| <i>Acidobacteria</i>                                       | 1.999                                             | 2.021      | 0.860                                                   | 2.035      |
| <i>Cyanobacteria</i>                                       | 0.693                                             | 0.677      | 0.340                                                   | 0.718      |
| <i>Verrucomicrobia</i>                                     | 0.202                                             | 0.199      | 0.088                                                   | 0.197      |
| <i>Basidiomycota</i>                                       | 0.017                                             | 0.017      | 0.010                                                   | 0.013      |
| <i>Armatimonadetes</i>                                     | ND <sup>4</sup>                                   | ND         | ND                                                      | ND         |
| <i>Glomeromycota</i>                                       | 0.002                                             | 0.004      | 0.0003                                                  | 0.002      |
| <i>Planctomycetes</i>                                      | 0.189                                             | 0.190      | 0.093                                                   | 0.197      |
| <i>Nitrospirae</i>                                         | 0.050                                             | 0.057      | 0.036                                                   | 0.058      |
| <i>Chloroflexi</i>                                         | 0.542                                             | 0.550      | 0.241                                                   | 0.523      |
| <i>Thaumarchaeota</i>                                      | 0.246                                             | 0.638      | 0.033                                                   | 0.774      |

<sup>1</sup> Table cells filled with green color indicated that the relative abundances of those taxa in MGZ31DRh were higher than those in MGZ31J1DRh using two methods.

<sup>2</sup> Table cells filled with yellow color indicated that the relative abundances of those taxa in MGZ31DRh were lower than those in MGZ31J1DRh using two methods.

<sup>3</sup> Those digits with red color indicated that the relative abundance of the taxon in one sample was higher than that of the other sample.

<sup>4</sup> ND = not detected.

| Relative abundances of major classes in the rhizosphere soil |                                                      |            |                                                            |            |
|--------------------------------------------------------------|------------------------------------------------------|------------|------------------------------------------------------------|------------|
| Major taxonomic groups<br>(> 99.9%)                          | Relative abundances (%)                              |            |                                                            |            |
|                                                              | Assembled by SOAPdenovo2<br>according to gene number |            | assembled by SOAPdenovo2<br>according to Species abundance |            |
|                                                              | MGZ31DRh                                             | MGZ31J1DRh | MGZ31DRh                                                   | MGZ31J1DRh |
| Class                                                        |                                                      |            |                                                            |            |
| <i>Alphaproteobacteria</i> <sup>1</sup>                      | 21.666 <sup>3</sup>                                  | 19.609     | 53.942                                                     | 28.048     |
| <i>Betaproteobacteria</i>                                    | 10.145                                               | 10.106     | 7.246                                                      | 11.112     |
| Unclassified                                                 | 25.190                                               | 25.773     | 21.263                                                     | 31.421     |
| <i>Gammaproteobacteria</i> <sup>2</sup>                      | 3.696                                                | 3.723      | 2.257                                                      | 3.717      |
| <i>Actinobacteria</i>                                        | 7.264                                                | 6.931      | 9.728                                                      | 14.229     |
| <i>Bacilli</i>                                               | 0.607                                                | 0.668      | 0.329                                                      | 0.674      |
| <i>Sphingobacteriia</i>                                      | 1.846                                                | 1.757      | 1.082                                                      | 2.016      |
| <i>Gemmatimonadetes</i>                                      | 2.745                                                | 2.663      | 1.542                                                      | 2.930      |
| <i>Deltaproteobacteria</i>                                   | 0.645                                                | 0.649      | 0.301                                                      | 0.728      |
| <i>Flavobacteriia</i>                                        | 0.145                                                | 0.148      | 0.069                                                      | 0.151      |
| <i>Sordariomycetes</i>                                       | 0.055                                                | 0.055      | 0.033                                                      | 0.042      |
| <i>Eurotiomycetes</i>                                        | 0.011                                                | 0.008      | 0.004                                                      | 0.004      |
| <i>Acidobacteriia</i>                                        | 1.903                                                | 1.926      | 0.814                                                      | 1.934      |
| <i>Solibacteres</i>                                          | 0.044                                                | 0.042      | 0.024                                                      | 0.050      |
| <i>Opitutae</i>                                              | 0.017                                                | 0.013      | 0.009                                                      | 0.017      |
| <i>Cytophagia</i>                                            | 0.273                                                | 0.266      | 0.146                                                      | 0.279      |
| <i>Verrucomicrobiae</i>                                      | 0.105                                                | 0.102      | 0.048                                                      | 0.095      |
| <i>Glomeromycetes</i>                                        | 0.002                                                | 0.004      | 0.0003                                                     | 0.0023     |
| <i>Planctomycetia</i>                                        | 0.189                                                | 0.190      | 0.093                                                      | 0.197      |
| <i>Clostridia</i>                                            | 0.338                                                | 0.334      | 0.162                                                      | 0.340      |
| <i>Nitrospira</i>                                            | 0.050                                                | 0.057      | 0.036                                                      | 0.058      |
| <i>Dothideomycetes</i>                                       | 0.011                                                | 0.009      | 0.003                                                      | 0.005      |
| <i>Spartobacteria</i>                                        | 0.025                                                | 0.030      | 0.007                                                      | 0.025      |

|                        |       |       |       |       |
|------------------------|-------|-------|-------|-------|
| <i>Saccharomycetes</i> | 0.006 | 0.006 | 0.001 | 0.004 |
| <i>Agaricomycetes</i>  | 0.013 | 0.013 | 0.009 | 0.011 |

<sup>1</sup> Table cells filled with green color indicated that the relative abundances of those taxa in MGZ31DRh were higher than those in MGZ31J1DRh using two methods.

<sup>2</sup> Table cells filled with yellow color indicated that the relative abundances of those taxa in MGZ31DRh were lower than those in MGZ31J1DRh using two methods.

<sup>3</sup> Those digits with red color indicated that the relative abundance of the taxon in one sample was higher than that of the other sample.

| Relative abundances of major orders in the rhizosphere soil |                                                   |                 |                                                         |            |
|-------------------------------------------------------------|---------------------------------------------------|-----------------|---------------------------------------------------------|------------|
| Major taxonomic groups                                      | Relative abundances (%)                           |                 |                                                         |            |
|                                                             | Assembled by SOAPdenovo2 according to gene number |                 | assembled by SOAPdenovo2 according to Species abundance |            |
|                                                             | MGZ31DRh                                          | MGZ31J1DRh      | MGZ31DRh                                                | MGZ31J1DRh |
| <b>Order</b>                                                |                                                   |                 |                                                         |            |
| <i>Rhizobiales</i> <sup>1</sup>                             | 15.945 <sup>3</sup>                               | 14.347          | 49.737                                                  | 22.918     |
| <i>Burkholderiales</i>                                      | 9.374                                             | 9.301           | 6.932                                                   | 10.405     |
| Unclassified                                                | 29.184                                            | 29.354          | 23.690                                                  | 34.993     |
| <i>Enterobacteriales</i> <sup>2</sup>                       | 0.420                                             | 0.436           | 0.244                                                   | 0.532      |
| <i>Actinomycetales</i>                                      | 2.499                                             | 2.355           | 4.186                                                   | 6.081      |
| <i>Pseudomonadales</i>                                      | 0.937                                             | 0.964           | 0.713                                                   | 1.108      |
| <i>Xanthomonadales</i>                                      | 1.327                                             | 1.239           | 0.799                                                   | 1.167      |
| <i>Caulobacterales</i>                                      | 0.368                                             | 0.355           | 0.232                                                   | 0.293      |
| <i>Sphingomonadales</i>                                     | 4.135                                             | 3.723           | 2.851                                                   | 3.417      |
| <i>Sphingobacteriales</i>                                   | 1.846                                             | 1.757           | 1.082                                                   | 2.016      |
| <i>Lactobacillales</i>                                      | 0.084                                             | 0.099           | 0.052                                                   | 0.082      |
| <i>Bacillales</i>                                           | 0.498                                             | 0.537           | 0.266                                                   | 0.561      |
| <i>Myxococcales</i>                                         | 0.246                                             | 0.241           | 0.109                                                   | 0.238      |
| <i>Rhodocyclales</i>                                        | 0.174                                             | 0.194           | 0.078                                                   | 0.201      |
| <i>Neisseriales</i>                                         | 0.080                                             | 0.087           | 0.034                                                   | 0.072      |
| <i>Oscillatoriales</i>                                      | 0.122                                             | 0.114           | 0.054                                                   | 0.106      |
| <i>Flavobacteriales</i>                                     | 0.134                                             | 0.137           | 0.064                                                   | 0.142      |
| <i>Rhodospirillales</i>                                     | 0.229                                             | 0.233           | 0.195                                                   | 0.307      |
| <i>Hypocreales</i>                                          | 0.002                                             | 0.002           | 0.007                                                   | 0.002      |
| <i>Eurotiales</i>                                           | 0.002                                             | ND <sup>4</sup> | 0.001                                                   | 0.000      |
| <i>Acidobacteriales</i>                                     | 1.903                                             | 1.926           | 0.814                                                   | 1.934      |

<sup>1</sup> Table cells filled with green color indicated that the relative abundances of those taxons in MGZ31DRh were higher than those in MGZ31J1DRh using two methods.

<sup>2</sup> Table cells filled with yellow color indicated that the relative abundances of those taxons in MGZ31DRh were lower than those in MGZ31J1DRh using two methods.

<sup>3</sup> Those digits with red color indicated that the relative abundance of the taxon in one sample was higher than that of the other sample.

<sup>4</sup> ND = not detected.



| Relative abundances of major families in the rhizosphere soil |                                                      |            |                                                            |            |
|---------------------------------------------------------------|------------------------------------------------------|------------|------------------------------------------------------------|------------|
| Major taxonomic groups                                        | Relative abundances (%)                              |            |                                                            |            |
|                                                               | Assembled by SOAPdenovo2<br>according to gene number |            | assembled by SOAPdenovo2<br>according to Species abundance |            |
|                                                               | MGZ31DRh                                             | MGZ31J1DRh | MGZ31DRh                                                   | MGZ31J1DRh |
| <b>Family</b>                                                 |                                                      |            |                                                            |            |
| <i>Bradyrhizobiaceae</i> <sup>1</sup>                         | 14.488 <sup>3</sup>                                  | 12.986     | 46.704                                                     | 20.626     |
| Unclassified                                                  | 33.867                                               | 33.844     | 29.610                                                     | 43.468     |
| <i>Burkholderiaceae</i>                                       | 6.443                                                | 6.080      | 5.659                                                      | 7.395      |
| <i>Enterobacteriaceae</i> <sup>2</sup>                        | 0.420                                                | 0.436      | 0.244                                                      | 0.532      |
| <i>Comamonadaceae</i>                                         | 1.932                                                | 2.162      | 0.746                                                      | 2.008      |
| <i>Streptomycetaceae</i>                                      | 0.741                                                | 0.717      | 0.712                                                      | 1.062      |
| <i>Rhizobiaceae</i>                                           | 0.496                                                | 0.474      | 0.900                                                      | 0.832      |
| <i>Phyllobacteriaceae</i>                                     | 0.233                                                | 0.205      | 0.810                                                      | 0.413      |
| <i>Pseudomonadaceae</i>                                       | 0.825                                                | 0.852      | 0.595                                                      | 0.930      |
| <i>Oxalobacteraceae</i>                                       | 0.237                                                | 0.251      | 0.176                                                      | 0.288      |
| <i>Alcaligenaceae</i>                                         | 0.124                                                | 0.133      | 0.065                                                      | 0.112      |
| <i>Xanthomonadaceae</i>                                       | 1.298                                                | 1.211      | 0.779                                                      | 1.132      |
| <i>Caulobacteraceae</i>                                       | 0.368                                                | 0.355      | 0.232                                                      | 0.293      |
| <i>Sphingomonadaceae</i>                                      | 3.816                                                | 3.441      | 2.615                                                      | 3.147      |
| <i>Streptococcaceae</i>                                       | 0.029                                                | 0.032      | 0.012                                                      | 0.031      |
| <i>Bacillaceae</i>                                            | 0.162                                                | 0.180      | 0.094                                                      | 0.207      |
| <i>Rhodocyclaceae</i>                                         | 0.174                                                | 0.194      | 0.078                                                      | 0.201      |
| <i>Micromonosporaceae</i>                                     | 0.292                                                | 0.279      | 0.394                                                      | 0.598      |
| <i>Mycobacteriaceae</i>                                       | 0.302                                                | 0.296      | 0.340                                                      | 0.487      |
| <i>Pseudonocardiaceae</i>                                     | 0.428                                                | 0.406      | 0.566                                                      | 0.878      |
| <i>Methylobacteriaceae</i>                                    | 0.158                                                | 0.146      | 0.397                                                      | 0.314      |
| <i>Chromobacteriaceae</i>                                     | 0.025                                                | 0.030      | 0.010                                                      | 0.027      |
| <i>Nocardioidaceae</i>                                        | 1.233                                                | 1.139      | 1.266                                                      | 1.724      |

|                            |                 |       |                 |       |
|----------------------------|-----------------|-------|-----------------|-------|
| <i>Flavobacteriaceae</i>   | 0.124           | 0.125 | 0.059           | 0.129 |
| <i>Myxococcaceae</i>       | 0.017           | 0.019 | 0.013           | 0.013 |
| <i>Rhodospirillaceae</i>   | 0.109           | 0.118 | 0.091           | 0.123 |
| <i>Polyangiaceae</i>       | 0.057           | 0.061 | 0.023           | 0.074 |
| <i>Nectriaceae</i>         | ND <sup>4</sup> | ND    | NA <sup>5</sup> | NA    |
| <i>Nocardiaceae</i>        | 0.244           | 0.243 | 0.566           | 0.878 |
| <i>Aspergillaceae</i>      | 0.002           | ND    | 0.001           | 0.000 |
| <i>Geodermatophilaceae</i> | 0.046           | 0.046 | 0.092           | 0.128 |

<sup>1</sup> Table cells filled with green color indicated that the relative abundances of those taxa in MGZ31DRh were higher than those in MGZ31J1DRh using two methods.

<sup>2</sup> Table cells filled with yellow color indicated that the relative abundances of those taxa in MGZ31DRh were lower than those in MGZ31J1DRh using two methods.

<sup>3</sup> Those digits with red color indicated that the relative abundance of the taxon in one sample was higher than that of the other sample.

<sup>4</sup> ND = not detected.

<sup>5</sup> NA = not announced because it was much less than 0.001.

| Relative abundances of major genera in the rhizosphere soil |                                                   |            |                                                         |            |
|-------------------------------------------------------------|---------------------------------------------------|------------|---------------------------------------------------------|------------|
| Major taxonomic groups                                      | Relative abundances (%)                           |            |                                                         |            |
|                                                             | Assembled by SOAPdenovo2 according to gene number |            | assembled by SOAPdenovo2 according to Species abundance |            |
|                                                             | MGZ31DRh                                          | MGZ31J1DRh | MGZ31DRh                                                | MGZ31J1DRh |
| <b>Genus</b>                                                |                                                   |            |                                                         |            |
| <i>Bradyrhizobium</i> <sup>1</sup>                          | 13.955 <sup>3</sup>                               | 12.499     | 45.276                                                  | 19.792     |
| Unclassified                                                |                                                   |            | 33.869                                                  | 50.330     |
| <i>Ralstonia</i>                                            | 4.738                                             | 4.361      | 4.622                                                   | 5.750      |
| <i>Cupriavidus</i>                                          | 0.162                                             | 0.161      | 0.108                                                   | 0.147      |
| <i>Burkholderia</i> <sup>2</sup>                            | 1.348                                             | 1.355      | 0.795                                                   | 1.284      |
| <i>Variovorax</i>                                           | 0.685                                             | 0.672      | 0.333                                                   | 0.578      |
| <i>Enterobacter</i>                                         | 0.008                                             | 0.006      | 0.009                                                   | 0.005      |
| <i>Streptomyces</i>                                         | 0.720                                             | 0.696      | 0.683                                                   | 1.020      |
| <i>Mesorhizobium</i>                                        | 0.168                                             | 0.154      | 0.628                                                   | 0.185      |
| <i>Rhizobium</i>                                            | 0.227                                             | 0.226      | 0.442                                                   | 0.504      |
| <i>Pseudomonas</i>                                          | 0.823                                             | 0.850      | 0.594                                                   | 0.928      |
| <i>Herbaspirillum</i>                                       | 0.061                                             | 0.068      | 0.039                                                   | 0.063      |
| <i>Achromobacter</i>                                        | 0.036                                             | 0.044      | 0.016                                                   | 0.035      |
| <i>Rhodopseudomonas</i>                                     | 0.107                                             | 0.095      | 0.413                                                   | 0.240      |
| <i>Acidovorax</i>                                           | 0.158                                             | 0.209      | 0.069                                                   | 0.192      |
| <i>Niastella</i>                                            | 0.002                                             | 0.002      | 0.000                                                   | 0.001      |
| <i>Caulobacter</i>                                          | 0.258                                             | 0.247      | 0.168                                                   | 0.196      |
| <i>Streptococcus</i>                                        | 0.025                                             | 0.028      | 0.011                                                   | 0.028      |
| <i>Delftia</i>                                              | 0.021                                             | 0.021      | 0.013                                                   | 0.029      |
| <i>Comamonas</i>                                            | 0.038                                             | 0.044      | 0.015                                                   | 0.031      |
| <i>Bacillus</i>                                             | 0.103                                             | 0.120      | 0.001                                                   | 0.005      |
| <i>Stenotrophomonas</i>                                     | 0.038                                             | 0.030      | 0.020                                                   | 0.029      |

|                           |                 |       |                 |       |
|---------------------------|-----------------|-------|-----------------|-------|
| <i>Sphingomonas</i>       | 1.054           | 0.979 | 0.695           | 0.961 |
| <i>Ramlibacter</i>        | 0.023           | 0.032 | 0.005           | 0.033 |
| <i>Mycobacterium</i>      | 0.300           | 0.296 | 0.340           | 0.487 |
| <i>Phenylobacterium</i>   | 0.006           | 0.006 | 0.002           | 0.006 |
| <i>Methylobacterium</i>   | 0.107           | 0.097 | 0.232           | 0.182 |
| <i>Novosphingobium</i>    | 0.792           | 0.693 | 0.580           | 0.482 |
| <i>Pseudogulbenkiania</i> | 0.015           | 0.019 | 0.005           | 0.015 |
| <i>Rubrivivax</i>         | 0.021           | 0.023 | 0.007           | 0.024 |
| <i>Actinoplanes</i>       | 0.059           | 0.059 | 0.067           | 0.105 |
| <i>Sphingobium</i>        | 0.300           | 0.281 | 0.580           | 0.482 |
| <i>Amycolatopsis</i>      | 0.143           | 0.131 | 0.158           | 0.259 |
| <i>Azospira</i>           | ND <sup>4</sup> | ND    | NA <sup>5</sup> | NA    |
| <i>Oscillatoria</i>       | 0.021           | 0.019 | 0.009           | 0.018 |
| <i>Alicyclophilus</i>     | ND              | ND    | NA              | NA    |
| <i>Agrobacterium</i>      | 0.065           | 0.065 | 0.075           | 0.063 |
| <i>Pseudoxanthomonas</i>  | 0.004           | 0.006 | 0.001           | 0.003 |
| <i>Xanthomonas</i>        | 0.246           | 0.233 | 0.145           | 0.194 |
| <i>Chitinophaga</i>       | 0.004           | 0.004 | 0.001           | 0.003 |
| <i>Fusarium</i>           | ND              | ND    | NA              | NA    |
| <i>Sorangium</i>          | 0.002           | 0.004 | 0.001           | 0.003 |
| <i>Methylbium</i>         | ND              | 0.002 | 0.000           | 0.001 |
| <i>Leptothrix</i>         | 0.002           | 0.002 | 0.001           | 0.001 |
| <i>Azospirillum</i>       | 0.036           | 0.044 | 0.030           | 0.042 |
| <i>Azoarcus</i>           | 0.027           | 0.028 | 0.015           | 0.032 |
| <i>Chryseobacterium</i>   | 0.008           | 0.008 | 0.005           | 0.008 |
| <i>Serratia</i>           | 0.006           | 0.006 | 0.002           | 0.007 |

<sup>1</sup> Table cells filled with green color indicated that the relative abundances of those taxa in MGZ31DRh were higher than those in MGZ31J1DRh using two methods.

<sup>2</sup> Table cells filled with yellow color indicated that the relative abundances of those taxa in MGZ31DRh were lower than those in MGZ31J1DRh using two

methods.

<sup>3</sup> Those digits with red color indicated that the relative abundance of the taxon in one sample was higher than that of the other sample.

<sup>4</sup> ND = not detected.

<sup>5</sup> NA = not announced because it was much less than 0.001.

| Relative abundances of major species in the rhizosphere soil |                                                   |              |                                                         |               |
|--------------------------------------------------------------|---------------------------------------------------|--------------|---------------------------------------------------------|---------------|
| Major taxonomic groups                                       | Relative abundances (%)                           |              |                                                         |               |
|                                                              | Assembled by SOAPdenovo2 according to gene number |              | assembled by SOAPdenovo2 according to Species abundance |               |
|                                                              | MGZ31DRh                                          | MGZ31J1DRh   | MGZ31DRh                                                | MGZ31J1DRh    |
| <b>Species</b>                                               |                                                   |              |                                                         |               |
| Unclassified                                                 | 41.719                                            | 41.439       | 46.152                                                  | 54.143        |
| <b><i>Bradyrhizobium elkanii</i><sup>1</sup></b>             | <b>10.034<sup>3</sup></b>                         | <b>8.965</b> | <b>30.203</b>                                           | <b>13.741</b> |
| <i>Ralstonia pickettii</i>                                   | 3.539                                             | 3.239        | 3.501                                                   | 4.345         |
| <i>Plautia stali symbiont</i>                                | ND                                                | ND           | NA                                                      | NA            |
| <i>Cupriavidus necator</i>                                   | 0.004                                             | 0.004        | 0.003                                                   | 0.002         |
| <i>Variovorax paradoxus</i>                                  | 0.271                                             | 0.256        | 0.142                                                   | 0.236         |
| <i>Cupriavidus taiwanensis</i>                               | 0.011                                             | 0.008        | 0.009                                                   | 0.012         |
| <b><i>Bradyrhizobium japonicum</i></b>                       | <b>0.748</b>                                      | <b>0.657</b> | <b>2.648</b>                                            | <b>1.017</b>  |
| <i>Herbaspirillum seropedicae</i>                            | ND <sup>4</sup>                                   | ND           | NA <sup>5</sup>                                         | NA            |
| <i>Enterobacter cloacae</i>                                  | ND                                                | ND           | NA                                                      | NA            |
| <b><i>Achromobacter xylosoxidans</i><sup>2</sup></b>         | 0.017                                             | <b>0.023</b> | 0.007                                                   | <b>0.017</b>  |
| <i>Enterobacter sp. R4-368</i>                               | ND                                                | ND           | NA                                                      | NA            |
| <i>Ralstonia mannitolilytica</i>                             | 0.002                                             | 0.002        | 0.001                                                   | 0.001         |
| <i>Rhodopseudomonas palustris</i>                            | 0.004                                             | 0.004        | <b>0.005</b>                                            | 0.001         |
| <i>Cupriavidus pinatubonensis</i>                            | ND                                                | 0.002        | 0.000                                                   | 0.000         |
| <i>Bradyrhizobium sp. S23321</i>                             | 0.006                                             | 0.006        | <b>0.015</b>                                            | 0.008         |
| <i>Niastella koreensis</i>                                   | 0.002                                             | 0.002        | 0.000                                                   | 0.001         |
| <i>Ralstonia solanacearum</i>                                | <b>0.185</b>                                      | 0.182        | 0.125                                                   | <b>0.183</b>  |
| <i>Streptococcus agalactiae</i>                              | 0.002                                             | 0.002        | 0.001                                                   | 0.001         |
| <i>Gemmatimonadetes bacterium KBS708</i>                     | <b>2.684</b>                                      | 2.602        | 1.503                                                   | <b>2.857</b>  |
| <i>Comamonas testosteroni</i>                                | 0.025                                             | 0.025        | 0.011                                                   | 0.015         |

|                                     |       |       |       |       |
|-------------------------------------|-------|-------|-------|-------|
| <i>Rhizobium sp. IRBG74</i>         | ND    | ND    | NA    | NA    |
| <i>Burkholderia sp. CCGE1001</i>    | ND    | ND    | NA    | NA    |
| <i>Stenotrophomonas maltophilia</i> | 0.032 | 0.027 | 0.015 | 0.024 |
| <i>Ramlibacter tataouinensis</i>    | 0.023 | 0.032 | 0.005 | 0.033 |
| <i>Burkholderia cepacia</i>         | 0.008 | 0.008 | 0.009 | 0.007 |
| <i>Phenylobacterium zucineum</i>    | 0.006 | 0.006 | 0.002 | 0.006 |
| <i>Mesorhizobium huakuii</i>        | ND    | ND    | NA    | NA    |
| <i>Bradyrhizobium sp. BTAi1</i>     | 0.004 | 0.004 | 0.016 | 0.007 |
| <i>Burkholderia cenocepacia</i>     | 0.015 | 0.017 | 0.008 | 0.014 |
| <i>Bradyrhizobium sp. ORS 278</i>   | ND    | ND    | NA    | NA    |
| <i>Bacillus megaterium</i>          | 0.002 | 0.002 | 0.001 | 0.002 |
| <i>Acidovorax sp. KKS102</i>        | ND    | ND    | NA    | NA    |
| <i>Pseudogulbenkiania sp. NH8B</i>  | ND    | ND    | NA    | NA    |
| <i>Caulobacter segnis</i>           | ND    | ND    | NA    | NA    |
| <i>Pseudomonas putida</i>           | 0.036 | 0.034 | 0.019 | 0.058 |
| <i>Rhizobium etli</i>               | 0.011 | 0.011 | 0.005 | 0.009 |
| <i>Pseudomonas aeruginosa</i>       | 0.095 | 0.089 | 0.090 | 0.149 |
| <i>Delftia acidovorans</i>          | 0.019 | 0.019 | 0.012 | 0.028 |
| <i>Rubrivivax gelatinosus</i>       | 0.002 | 0.004 | 0.000 | 0.006 |
| <i>Sphingomonas wittichii</i>       | 0.151 | 0.133 | 0.125 | 0.127 |
| <i>Caulobacter vibrioides</i>       | 0.092 | 0.084 | 0.061 | 0.066 |
| <i>Delftia sp. Cs1-4</i>            | ND    | ND    | NA    | NA    |
| <i>Azospira oryzae</i>              | ND    | ND    | NA    | NA    |
| <i>Alicyclophilus denitrificans</i> | ND    | ND    | NA    | NA    |
| <i>Oscillatoria nigro-viridis</i>   | ND    | ND    | NA    | NA    |
| <i>Burkholderia ambifaria</i>       | 0.004 | 0.004 | 0.002 | 0.002 |
| <i>Mesorhizobium loti</i>           | 0.034 | 0.032 | 0.062 | 0.056 |
| <i>Rhizobium leguminosarum</i>      | 0.067 | 0.066 | 0.163 | 0.179 |
| <i>Sorangium cellulosum</i>         | 0.002 | 0.004 | 0.001 | 0.003 |

|                                        |       |       |       |       |
|----------------------------------------|-------|-------|-------|-------|
| <i>Methylibium petroleiphilum</i>      | ND    | 0.002 | 0.000 | 0.001 |
| <i>Chitinophaga pinensis</i>           | 0.004 | 0.004 | 0.001 | 0.003 |
| <i>Leptothrix cholodnii</i>            | ND    | ND    | NA    | NA    |
| <i>Amycolatopsis mediterranei</i>      | 0.015 | 0.013 | 0.008 | 0.017 |
| <i>Rhizobium tropici</i>               | ND    | ND    | NA    | NA    |
| <i>blood disease bacterium R229</i>    | 0.006 | 0.008 | 0.004 | 0.009 |
| <i>Pseudoxanthomonas suwonensis</i>    | 0.004 | 0.006 | 0.001 | 0.003 |
| <i>Nectria haematococca</i>            | ND    | ND    | NA    | NA    |
| <i>Burkholderia sp. CCGE1003</i>       | ND    | 0.002 | 0.000 | 0.001 |
| <i>Acidovorax citrulli</i>             | ND    | ND    | NA    | NA    |
| <i>Cupriavidus metallidurans</i>       | 0.002 | 0.004 | 0.006 | 0.004 |
| <i>Mesorhizobium opportunistum</i>     | 0.004 | 0.004 | 0.003 | 0.003 |
| <i>Streptomyces bingchengensis</i>     | ND    | 0.002 | 0.000 | 0.001 |
| <i>Mesorhizobium australicum</i>       | ND    | ND    |       |       |
| <i>Novosphingobium aromaticivorans</i> | 0.011 | 0.011 | 0.005 | 0.011 |
| <i>Azoarcus sp. KH32C</i>              | ND    | ND    | NA    | NA    |
| <i>Chryseobacterium sp. StRB126</i>    | ND    | ND    | NA    | NA    |

<sup>1</sup> Table cells filled with green color indicated that the relative abundances of those taxa in MGZ31DRh were higher than those in MGZ31J1DRh using two methods.

<sup>2</sup> Table cells filled with yellow color indicated that the relative abundances of those taxa in MGZ31DRh were lower than those in MGZ31J1DRh using two methods.

<sup>3</sup> Those digits with red color indicated that the relative abundance of the taxon in one sample was higher than that of the other sample.

<sup>4</sup> ND = not detected.

<sup>5</sup> NA = not announced because it was much less than 0.001.



Table S14. Alpha diversity (Shannon) statistics assembled by SOAPdenovo2.

| Comparison             | Test     | <i>p</i> -value |
|------------------------|----------|-----------------|
| MGZ31J1DRh_vs_MGZ31DRh | wilcoxon | 1.00            |

## Shannon Index assembled by SOAPdenovo2.

| Sample Name | Shannon Index |
|-------------|---------------|
| MGZ31DRh    | 2.288909784   |
| MGZ31J1DRh  | 2.583866236   |

| <b>Comparison</b>      | <b>Test</b> | <b><i>p</i> -value</b> |
|------------------------|-------------|------------------------|
| MGZ31J1DRh_vs_MGZ31DRh | wilcoxon    | 1.00                   |

Table S15. Relative abundances of major taxons at different classification level in the rhizosphere soil.

| Relative abundances of major kingdoms in the rhizosphere soil |                                                  |            |                                                         |            |
|---------------------------------------------------------------|--------------------------------------------------|------------|---------------------------------------------------------|------------|
| Major taxons                                                  | Relative abundances (%)                          |            |                                                         |            |
|                                                               | Taxonomic assignment based clean reads alignment |            | assembled by SOAPdenovo2 according to Species abundance |            |
|                                                               | MGZ31DRh                                         | MGZ31J1DRh | MGZ31DRh                                                | MGZ31J1DRh |
| Kingdom                                                       |                                                  |            |                                                         |            |
| <b>Bacteria</b> <sup>1</sup>                                  | 86.120 <sup>3</sup>                              | 85.853     | 84.338                                                  | 79.097     |
| Unclassified                                                  | 13.180                                           | 13.235     | 14.726                                                  | 18.634     |
| <b>Fungi</b> <sup>2</sup>                                     | 0.674                                            | 0.855      | 0.070                                                   | 0.105      |
| <b>Viruses</b>                                                | 0.014                                            | 0.019      | 0.739                                                   | 0.925      |
| <b>Archaea</b>                                                | 0.013                                            | 0.038      | 0.127                                                   | 1.240      |

<sup>1</sup> Table cells filled with green color indicated that the relative abundances of those taxons in MGZ31DRh were higher than those in MGZ31J1DRh using two methods.

<sup>2</sup> Table cells filled with yellow color indicated that the relative abundances of those taxons in MGZ31DRh were lower than those in MGZ31J1DRh using two methods.

<sup>3</sup> Those digits with red color indicated that the relative abundance of the taxon in one sample was higher than that of the other sample.

| Relative abundances of major phyla in the rhizosphere soil |                                                  |            |                                                         |            |
|------------------------------------------------------------|--------------------------------------------------|------------|---------------------------------------------------------|------------|
| Major taxons                                               | Relative abundances (%)                          |            |                                                         |            |
|                                                            | Taxonomic assignment based clean reads alignment |            | assembled by SOAPdenovo2 according to Species abundance |            |
|                                                            | MGZ31DRh                                         | MGZ31J1DRh | MGZ31DRh                                                | MGZ31J1DRh |
| Phylum                                                     |                                                  |            |                                                         |            |
| <i>Proteobacteria</i> <sup>1</sup>                         | 76.955 <sup>3</sup>                              | 71.796     | 65.403                                                  | 46.176     |
| Unclassified                                               | 14.181                                           | 14.415     | 18.001                                                  | 24.870     |
| <i>Actinobacteria</i> <sup>2</sup>                         | 4.343                                            | 6.391      | 9.833                                                   | 14.542     |
| <i>Firmicutes</i>                                          | 1.290                                            | 2.195      | 0.621                                                   | 1.336      |
| <i>Bacteroidetes</i>                                       | 1.276                                            | 1.902      | 2.461                                                   | 4.690      |
| <i>Gemmatimonadetes</i>                                    | 0.666                                            | 1.605      | 1.542                                                   | 2.930      |
| <i>Ascomycota</i>                                          | 0.390                                            | 0.463      | 0.052                                                   | 0.074      |
| <i>Acidobacteria</i>                                       | 0.290                                            | 0.616      | 0.860                                                   | 2.035      |
| <i>Cyanobacteria</i>                                       | 0.256                                            | 0.083      | 0.340                                                   | 0.718      |
| <i>Verrucomicrobia</i>                                     | 0.112                                            | 0.153      | 0.088                                                   | 0.197      |
| <i>Basidiomycota</i>                                       | 0.062                                            | 0.081      | 0.010                                                   | 0.013      |
| <i>Armatimonadetes</i>                                     | 0.039                                            | 0.055      | ND <sup>4</sup>                                         | ND         |
| <i>Glomeromycota</i>                                       | 0.029                                            | 0.038      | 0.0003                                                  | 0.002      |
| <i>Planctomycetes</i>                                      | 0.029                                            | 0.054      | 0.093                                                   | 0.197      |
| <i>Nitrospirae</i>                                         | 0.021                                            | 0.045      | 0.036                                                   | 0.058      |
| <i>Chloroflexi</i>                                         | 0.014                                            | 0.017      | 0.241                                                   | 0.523      |
| <i>Thaumarchaeota</i>                                      | 0.008                                            | 0.037      | 0.033                                                   | 0.774      |

<sup>1</sup> Table cells filled with green color indicated that the relative abundances of those taxons in MGZ31DRh were higher than those in MGZ31J1DRh using two methods.

<sup>2</sup> Table cells filled with yellow color indicated that the relative abundances of those taxons in MGZ31DRh were lower than those in MGZ31J1DRh using two methods.

<sup>3</sup> Those digits with red color indicated that the relative abundance of the taxon in one sample was higher than that of the other sample.

<sup>4</sup> ND = not detected.

| Relative abundances of major Classes in the rhizosphere soil |                                                  |            |                                                         |            |
|--------------------------------------------------------------|--------------------------------------------------|------------|---------------------------------------------------------|------------|
| Major taxons<br>(> 99.9%)                                    | Relative abundances (%)                          |            |                                                         |            |
|                                                              | Taxonomic assignment based clean reads alignment |            | assembled by SOAPdenovo2 according to Species abundance |            |
|                                                              | MGZ31DRh                                         | MGZ31J1DRh | MGZ31DRh                                                | MGZ31J1DRh |
| Class                                                        |                                                  |            |                                                         |            |
| <b>Alphaproteobacteria</b> <sup>1</sup>                      | 38.726 <sup>3</sup>                              | 29.032     | 53.942                                                  | 28.048     |
| <b>Betaproteobacteria</b> <sup>2</sup>                       | 28.521                                           | 37.222     | 7.246                                                   | 11.112     |
| Unclassified                                                 | 15.089                                           | 15.558     | 21.263                                                  | 31.421     |
| <b>Gammaproteobacteria</b>                                   | 8.856                                            | 4.186      | 2.257                                                   | 3.717      |
| <b>Actinobacteria</b>                                        | 4.343                                            | 6.391      | 9.728                                                   | 14.229     |
| <b>Bacilli</b>                                               | 1.260                                            | 2.137      | 0.329                                                   | 0.674      |
| <b>Sphingobacteriia</b>                                      | 0.973                                            | 1.054      | 1.082                                                   | 2.016      |
| <b>Gemmatimonadetes</b>                                      | 0.666                                            | 1.605      | 1.542                                                   | 2.930      |
| <b>Deltaproteobacteria</b>                                   | 0.501                                            | 0.829      | 0.301                                                   | 0.728      |
| <b>Flavobacteriia</b>                                        | 0.217                                            | 0.733      | 0.069                                                   | 0.151      |
| <b>Sordariomycetes</b>                                       | 0.199                                            | 0.216      | 0.033                                                   | 0.042      |
| <b>Eurotiomycetes</b>                                        | 0.119                                            | 0.175      | 0.004                                                   | 0.004      |
| <b>Acidobacteria</b>                                         | 0.097                                            | 0.217      | 0.814                                                   | 1.934      |
| <b>Solibacteres</b>                                          | 0.065                                            | 0.127      | 0.024                                                   | 0.050      |
| <b>Opitutae</b>                                              | 0.052                                            | 0.070      | 0.009                                                   | 0.017      |
| <b>Cytophagia</b>                                            | 0.048                                            | 0.066      | 0.146                                                   | 0.279      |
| <b>Verrucomicrobiae</b>                                      | 0.031                                            | 0.039      | 0.048                                                   | 0.095      |

|                        |       |       |        |        |
|------------------------|-------|-------|--------|--------|
| <i>Glomeromycetes</i>  | 0.025 | 0.035 | 0.0003 | 0.0023 |
| <i>Planctomycetia</i>  | 0.025 | 0.049 | 0.093  | 0.197  |
| <i>Clostridia</i>      | 0.022 | 0.047 | 0.162  | 0.340  |
| <i>Nitrospira</i>      | 0.021 | 0.045 | 0.036  | 0.058  |
| <i>Dothideomycetes</i> | 0.018 | 0.016 | 0.003  | 0.005  |
| <i>Spartobacteria</i>  | 0.016 | 0.025 | 0.007  | 0.025  |
| <i>Saccharomycetes</i> | 0.016 | 0.016 | 0.001  | 0.004  |
| <i>Agaricomycetes</i>  | 0.014 | 0.018 | 0.009  | 0.011  |

<sup>1</sup> Table cells filled with green color indicated that the relative abundances of those taxa in MGZ31DRh were higher than those in MGZ31J1DRh using two methods.

<sup>2</sup> Table cells filled with yellow color indicated that the relative abundances of those taxa in MGZ31DRh were lower than those in MGZ31J1DRh using two methods.

<sup>3</sup> Those digits with red color indicated that the relative abundance of the taxon in one sample was higher than that of the other sample.

| Relative abundances of major Orders in the rhizosphere soil |                                                  |            |                                                         |            |
|-------------------------------------------------------------|--------------------------------------------------|------------|---------------------------------------------------------|------------|
| Major taxons                                                | Relative abundances (%)                          |            |                                                         |            |
|                                                             | Taxonomic assignment based clean reads alignment |            | assembled by SOAPdenovo2 according to Species abundance |            |
|                                                             | MGZ31DRh                                         | MGZ31J1DRh | MGZ31DRh                                                | MGZ31J1DRh |
| Order                                                       |                                                  |            |                                                         |            |
| <i>Rhizobiales</i> <sup>1</sup>                             | 35.947 <sup>3</sup>                              | 25.312     | 49.737                                                  | 22.918     |
| <i>Burkholderiales</i> <sup>2</sup>                         | 27.566                                           | 36.117     | 6.932                                                   | 10.405     |
| Unclassified                                                | 16.048                                           | 17.886     | 23.690                                                  | 34.993     |
| <i>Enterobacteriales</i>                                    | 6.218                                            | 0.931      | 0.244                                                   | 0.532      |
| <i>Actinomycetales</i>                                      | 4.213                                            | 6.117      | 4.186                                                   | 6.081      |
| <i>Pseudomonadales</i>                                      | 1.310                                            | 1.975      | 0.713                                                   | 1.108      |
| <i>Xanthomonadales</i>                                      | 1.162                                            | 1.034      | 0.799                                                   | 1.167      |
| <i>Caulobacterales</i>                                      | 1.130                                            | 1.120      | 0.232                                                   | 0.293      |
| <i>Sphingomonadales</i>                                     | 1.129                                            | 1.885      | 2.851                                                   | 3.417      |
| <i>Sphingobacteriales</i>                                   | 0.973                                            | 1.053      | 1.082                                                   | 2.016      |
| <i>Lactobacillales</i>                                      | 0.676                                            | 1.087      | 0.052                                                   | 0.082      |
| <i>Bacillales</i>                                           | 0.579                                            | 1.043      | 0.266                                                   | 0.561      |
| <i>Myxococcales</i>                                         | 0.467                                            | 0.755      | 0.109                                                   | 0.238      |
| <i>Rhodocyclales</i>                                        | 0.372                                            | 0.278      | 0.078                                                   | 0.201      |
| <i>Neisseriales</i>                                         | 0.287                                            | 0.407      | 0.034                                                   | 0.072      |

|                         |       |       |       |       |
|-------------------------|-------|-------|-------|-------|
| <i>Oscillatoriales</i>  | 0.232 | 0.072 | 0.054 | 0.106 |
| <i>Flavobacteriales</i> | 0.217 | 0.732 | 0.064 | 0.142 |
| <i>Rhodospirillales</i> | 0.209 | 0.237 | 0.195 | 0.307 |
| <i>Hypocreales</i>      | 0.173 | 0.172 | 0.007 | 0.002 |
| <i>Eurotiales</i>       | 0.117 | 0.171 | 0.001 | 0.000 |
| <i>Acidobacteriales</i> | 0.097 | 0.217 | 0.814 | 1.934 |

<sup>1</sup> Table cells filled with green color indicated that the relative abundances of those taxons in MGZ31DRh were higher than those in MGZ31J1DRh using two methods.

<sup>2</sup> Table cells filled with yellow color indicated that the relative abundances of those taxons in MGZ31DRh were lower than those in MGZ31J1DRh using two methods.

<sup>3</sup> Those digits with red color indicated that the relative abundance of the taxon in one sample was higher than that of the other sample.



| Relative abundances of major families in the rhizosphere soil |                                                  |            |                                                         |            |
|---------------------------------------------------------------|--------------------------------------------------|------------|---------------------------------------------------------|------------|
| Major taxons                                                  | Relative abundances (%)                          |            |                                                         |            |
|                                                               | Taxonomic assignment based clean reads alignment |            | assembled by SOAPdenovo2 according to Species abundance |            |
|                                                               | MGZ31DRh                                         | MGZ31J1DRh | MGZ31DRh                                                | MGZ31J1DRh |
| Family                                                        |                                                  |            |                                                         |            |
| <i>Bradyrhizobiaceae</i> <sup>1</sup>                         | 32.159 <sup>3</sup>                              | 21.000     | 46.704                                                  | 20.626     |
| Unclassified                                                  | 19.197                                           | 21.843     | 29.610                                                  | 43.468     |
| <i>Burkholderiaceae</i> <sup>2</sup>                          | 18.113                                           | 25.620     | 5.659                                                   | 7.395      |
| <i>Enterobacteriaceae</i>                                     | 6.218                                            | 0.931      | 0.244                                                   | 0.532      |
| <i>Comamonadaceae</i>                                         | 5.861                                            | 7.852      | 0.746                                                   | 2.008      |
| <i>Streptomycetaceae</i>                                      | 1.757                                            | 2.254      | 0.712                                                   | 1.062      |
| <i>Rhizobiaceae</i>                                           | 1.623                                            | 1.506      | 0.900                                                   | 0.832      |
| <i>Phyllobacteriaceae</i>                                     | 1.353                                            | 1.818      | 0.810                                                   | 0.413      |
| <i>Pseudomonadaceae</i>                                       | 1.281                                            | 1.946      | 0.595                                                   | 0.930      |
| <i>Oxalobacteraceae</i>                                       | 1.241                                            | 0.311      | 0.176                                                   | 0.288      |
| <i>Alcaligenaceae</i>                                         | 1.217                                            | 0.655      | 0.065                                                   | 0.112      |
| <i>Xanthomonadaceae</i>                                       | 1.161                                            | 1.033      | 0.779                                                   | 1.132      |
| <i>Caulobacteraceae</i>                                       | 1.130                                            | 1.120      | 0.232                                                   | 0.293      |
| <i>Sphingomonadaceae</i>                                      | 1.092                                            | 1.834      | 2.615                                                   | 3.147      |
| <i>Streptococcaceae</i>                                       | 0.672                                            | 1.080      | 0.012                                                   | 0.031      |
| <i>Bacillaceae</i>                                            | 0.534                                            | 0.954      | 0.094                                                   | 0.207      |
| <i>Rhodocyclaceae</i>                                         | 0.372                                            | 0.278      | 0.078                                                   | 0.201      |

|                            |       |       |                 |       |
|----------------------------|-------|-------|-----------------|-------|
| <i>Micromonosporaceae</i>  | 0.370 | 0.475 | 0.394           | 0.598 |
| <i>Mycobacteriaceae</i>    | 0.363 | 0.481 | 0.340           | 0.487 |
| <i>Pseudonocardiaceae</i>  | 0.313 | 0.534 | 0.566           | 0.878 |
| <i>Methylobacteriaceae</i> | 0.311 | 0.434 | 0.397           | 0.314 |
| <i>Chromobacteriaceae</i>  | 0.281 | 0.401 | 0.010           | 0.027 |
| <i>Nocardioideaceae</i>    | 0.268 | 0.439 | 1.266           | 1.724 |
| <i>Flavobacteriaceae</i>   | 0.212 | 0.729 | 0.059           | 0.129 |
| <i>Myxococcaceae</i>       | 0.178 | 0.361 | 0.013           | 0.013 |
| <i>Rhodospirillaceae</i>   | 0.175 | 0.182 | 0.091           | 0.123 |
| <i>Polyangiaceae</i>       | 0.171 | 0.191 | 0.023           | 0.074 |
| <i>Nectriaceae</i>         | 0.165 | 0.159 | NA <sup>4</sup> | NA    |
| <i>Nocardiaceae</i>        | 0.131 | 0.200 | 0.566           | 0.878 |
| <i>Aspergillaceae</i>      | 0.116 | 0.168 | 0.001           | 0.000 |
| <i>Geodermatophilaceae</i> | 0.110 | 0.239 | 0.092           | 0.128 |

<sup>1</sup> Table cells filled with green color indicated that the relative abundances of those taxons in MGZ31DRh were higher than those in MGZ31J1DRh using two methods.

<sup>2</sup> Table cells filled with yellow color indicated that the relative abundances of those taxons in MGZ31DRh were lower than those in MGZ31J1DRh using two methods.

<sup>3</sup> Those digits with red color indicated that the relative abundance of the taxon in one sample was higher than that of the other sample.

<sup>4</sup> NA = not announced because it was much less than 0.001.

| Relative abundances of major genera in the rhizosphere soil |                                                  |            |                                                         |            |
|-------------------------------------------------------------|--------------------------------------------------|------------|---------------------------------------------------------|------------|
| Major taxons                                                | Relative abundances (%)                          |            |                                                         |            |
|                                                             | Taxonomic assignment based clean reads alignment |            | assembled by SOAPdenovo2 according to Species abundance |            |
| Genus                                                       | MGZ31DRh                                         | MGZ31J1DRh | MGZ31DRh                                                | MGZ31J1DRh |
| <i>Bradyrhizobium</i> <sup>1</sup>                          | 30.403 <sup>3</sup>                              | 19.497     | 45.276                                                  | 19.792     |
| Unclassified                                                | 23.508                                           | 23.042     | 33.869                                                  | 50.330     |
| <i>Ralstonia</i> <sup>2</sup>                               | 7.420                                            | 11.788     | 4.622                                                   | 5.750      |
| <i>Cupriavidus</i>                                          | 6.250                                            | 7.240      | 0.108                                                   | 0.147      |
| <i>Burkholderia</i>                                         | 3.925                                            | 5.870      | 0.795                                                   | 1.284      |
| <i>Variovorax</i>                                           | 2.629                                            | 3.600      | 0.333                                                   | 0.578      |
| <i>Enterobacter</i>                                         | 2.298                                            | 0.729      | 0.009                                                   | 0.005      |
| <i>Streptomyces</i>                                         | 1.668                                            | 2.105      | 0.683                                                   | 1.020      |
| <i>Mesorhizobium</i>                                        | 1.347                                            | 1.808      | 0.628                                                   | 0.185      |
| <i>Rhizobium</i>                                            | 1.279                                            | 0.998      | 0.442                                                   | 0.504      |
| <i>Pseudomonas</i>                                          | 1.253                                            | 1.898      | 0.594                                                   | 0.928      |
| <i>Herbaspirillum</i>                                       | 1.198                                            | 0.251      | 0.039                                                   | 0.063      |
| <i>Achromobacter</i>                                        | 1.090                                            | 0.504      | 0.016                                                   | 0.035      |
| <i>Rhodopseudomonas</i>                                     | 0.820                                            | 0.703      | 0.413                                                   | 0.240      |
| <i>Acidovorax</i>                                           | 0.779                                            | 0.986      | 0.069                                                   | 0.192      |
| <i>Niastella</i>                                            | 0.695                                            | 0.848      | 0.000                                                   | 0.001      |
| <i>Caulobacter</i>                                          | 0.693                                            | 0.376      | 0.168                                                   | 0.196      |
| <i>Streptococcus</i>                                        | 0.672                                            | 1.079      | 0.011                                                   | 0.028      |
| <i>Delftia</i>                                              | 0.671                                            | 1.135      | 0.013                                                   | 0.029      |
| <i>Comamonas</i>                                            | 0.621                                            | 0.162      | 0.015                                                   | 0.031      |
| <i>Bacillus</i>                                             | 0.523                                            | 0.936      | 0.001                                                   | 0.005      |
| <i>Stenotrophomonas</i>                                     | 0.515                                            | 0.397      | 0.020                                                   | 0.029      |

|                           |       |       |                 |       |
|---------------------------|-------|-------|-----------------|-------|
| <i>Sphingomonas</i>       | 0.395 | 0.761 | 0.695           | 0.961 |
| <i>Ramlibacter</i>        | 0.383 | 0.841 | 0.005           | 0.033 |
| <i>Mycobacterium</i>      | 0.363 | 0.480 | 0.340           | 0.487 |
| <i>Phenylobacterium</i>   | 0.362 | 0.632 | 0.002           | 0.006 |
| <i>Methylobacterium</i>   | 0.310 | 0.433 | 0.232           | 0.182 |
| <i>Novosphingobium</i>    | 0.300 | 0.525 | 0.580           | 0.482 |
| <i>Pseudogulbenkiania</i> | 0.268 | 0.378 | 0.005           | 0.015 |
| <i>Rubrivivax</i>         | 0.223 | 0.301 | 0.007           | 0.024 |
| <i>Actinoplanes</i>       | 0.210 | 0.249 | 0.067           | 0.105 |
| <i>Sphingobium</i>        | 0.201 | 0.214 | 0.580           | 0.482 |
| <i>Amycolatopsis</i>      | 0.201 | 0.332 | 0.158           | 0.259 |
| <i>Azospira</i>           | 0.196 | 0.020 | NA <sup>4</sup> | NA    |
| <i>Oscillatoria</i>       | 0.189 | 0.065 | 0.009           | 0.018 |
| <i>Alicyclophilus</i>     | 0.189 | 0.230 | NA              | NA    |
| <i>Agrobacterium</i>      | 0.177 | 0.321 | 0.075           | 0.063 |
| <i>Pseudoxanthomonas</i>  | 0.171 | 0.168 | 0.001           | 0.003 |
| <i>Xanthomonas</i>        | 0.170 | 0.163 | 0.145           | 0.194 |
| <i>Chitinophaga</i>       | 0.165 | 0.075 | 0.001           | 0.003 |
| <i>Fusarium</i>           | 0.163 | 0.154 | NA              | NA    |
| <i>Sorangium</i>          | 0.157 | 0.172 | 0.001           | 0.003 |
| <i>Methylibium</i>        | 0.155 | 0.223 | 0.000           | 0.001 |
| <i>Leptothrix</i>         | 0.149 | 0.213 | 0.001           | 0.001 |
| <i>Azospirillum</i>       | 0.135 | 0.122 | 0.030           | 0.042 |
| <i>Azoarcus</i>           | 0.119 | 0.164 | 0.015           | 0.032 |
| <i>Chryseobacterium</i>   | 0.108 | 0.081 | 0.005           | 0.008 |
| <i>Serratia</i>           | 0.101 | 0.015 | 0.002           | 0.007 |

<sup>1</sup> Table cells filled with green color indicated that the relative abundances of those taxa in MGZ31DRh were higher than those in MGZ31J1DRh using two methods.

<sup>2</sup> Table cells filled with yellow color indicated that the relative abundances of those taxa in MGZ31DRh were lower than those in MGZ31J1DRh using two methods.

<sup>3</sup> Those digits with red color indicated that the relative abundance of the taxon in one sample was higher than that of the other sample.

<sup>4</sup> NA = not announced because it was much less than 0.001.

| Relative abundances of major species in the rhizosphere soil |                                                  |               |                                                         |               |
|--------------------------------------------------------------|--------------------------------------------------|---------------|---------------------------------------------------------|---------------|
| Major taxons                                                 | Relative abundances (%)                          |               |                                                         |               |
|                                                              | Taxonomic assignment based clean reads alignment |               | assembled by SOAPdenovo2 according to Species abundance |               |
|                                                              | MGZ31DRh                                         | MGZ31J1DRh    | MGZ31DRh                                                | MGZ31J1DRh    |
| Species                                                      |                                                  |               |                                                         |               |
| Unclassified                                                 | 28.608                                           | 32.688        | 46.152                                                  | 54.143        |
| <i>Bradyrhizobium japonicum</i> <sup>1</sup>                 | <b>25.647</b> <sup>3</sup>                       | <b>16.005</b> | <b>2.648</b>                                            | <b>1.017</b>  |
| <i>Ralstonia pickettii</i> <sup>2</sup>                      | 4.382                                            | 6.891         | 3.501                                                   | 4.345         |
| <i>Plautia stali symbiont</i>                                | 3.377                                            | 0.022         | NA <sup>4</sup>                                         | NA            |
| <i>Cupriavidus necator</i>                                   | 2.654                                            | 4.178         | 0.003                                                   | 0.002         |
| <i>Variovorax paradoxus</i>                                  | 2.598                                            | 3.578         | 0.142                                                   | 0.236         |
| <i>Cupriavidus taiwanensis</i>                               | 1.592                                            | 0.765         | 0.009                                                   | 0.012         |
| <i>Bradyrhizobium elkanii</i>                                | <b>1.379</b>                                     | <b>0.879</b>  | <b>30.203</b>                                           | <b>13.741</b> |
| <i>Herbaspirillum seropedicae</i>                            | 1.193                                            | 0.247         | NA                                                      | NA            |
| <i>Enterobacter cloacae</i>                                  | 1.096                                            | 0.640         | NA                                                      | NA            |
| <i>Achromobacter xylosoxidans</i>                            | 1.086                                            | 0.499         | 0.007                                                   | 0.017         |
| <i>Enterobacter sp. R4-368</i>                               | 1.084                                            | 0.034         | NA                                                      | NA            |
| <i>Ralstonia mannitolilytica</i>                             | 0.991                                            | 1.613         | 0.001                                                   | 0.001         |
| <i>Rhodopseudomonas palustris</i>                            | 0.819                                            | 0.702         | 0.005                                                   | 0.001         |
| <i>Cupriavidus pinatubonensis</i>                            | 0.796                                            | 0.794         | 0.000                                                   | 0.000         |
| <i>Bradyrhizobium sp. S23321</i>                             | 0.726                                            | 0.657         | 0.015                                                   | 0.008         |
| <i>Niastella koreensis</i>                                   | 0.689                                            | 0.844         | 0.000                                                   | 0.001         |
| <i>Ralstonia solanacearum</i>                                | 0.655                                            | 1.069         | 0.125                                                   | 0.183         |
| <i>Streptococcus agalactiae</i>                              | 0.624                                            | 1.001         | 0.001                                                   | 0.001         |
| <i>Gemmatimonadetes bacterium KBS708</i>                     | 0.616                                            | 1.493         | 1.503                                                   | 2.857         |
| <i>Comamonas testosteroni</i>                                | 0.614                                            | 0.155         | 0.011                                                   | 0.015         |
| <i>Rhizobium sp. IRBG74</i>                                  | 0.597                                            | 0.488         | NA                                                      | NA            |
| <i>Burkholderia sp. CCGE1001</i>                             | 0.525                                            | 0.689         | NA                                                      | NA            |

|                                     |       |       |       |       |
|-------------------------------------|-------|-------|-------|-------|
| <i>Stenotrophomonas maltophilia</i> | 0.479 | 0.361 | 0.015 | 0.024 |
| <i>Ramlibacter tataouinensis</i>    | 0.377 | 0.828 | 0.005 | 0.033 |
| <i>Burkholderia cepacia</i>         | 0.352 | 0.453 | 0.009 | 0.007 |
| <i>Phenylobacterium zucineum</i>    | 0.337 | 0.591 | 0.002 | 0.006 |
| <i>Mesorhizobium huakuii</i>        | 0.319 | 0.421 | NA    | NA    |
| <i>Bradyrhizobium sp. BTA1</i>      | 0.318 | 0.257 | 0.016 | 0.007 |
| <i>Burkholderia cenocepacia</i>     | 0.309 | 0.530 | 0.008 | 0.014 |
| <i>Bradyrhizobium sp. ORS 278</i>   | 0.292 | 0.237 | NA    | NA    |
| <i>Bacillus megaterium</i>          | 0.284 | 0.484 | 0.001 | 0.002 |
| <i>Acidovorax sp. KKS102</i>        | 0.272 | 0.278 | NA    | NA    |
| <i>Pseudogulbenkiania sp. NH8B</i>  | 0.268 | 0.377 | NA    | NA    |
| <i>Caulobacter segnis</i>           | 0.257 | 0.111 | NA    | NA    |
| <i>Pseudomonas putida</i>           | 0.254 | 0.389 | 0.019 | 0.058 |
| <i>Rhizobium etli</i>               | 0.244 | 0.212 | 0.005 | 0.009 |
| <i>Pseudomonas aeruginosa</i>       | 0.243 | 0.598 | 0.090 | 0.149 |
| <i>Delftia acidovorans</i>          | 0.226 | 0.282 | 0.012 | 0.028 |
| <i>Rubrivivax gelatinosus</i>       | 0.223 | 0.301 | 0.000 | 0.006 |
| <i>Sphingomonas wittichii</i>       | 0.210 | 0.464 | 0.125 | 0.127 |
| <i>Caulobacter vibrioides</i>       | 0.206 | 0.114 | 0.061 | 0.066 |
| <i>Delftia sp. Cs1-4</i>            | 0.201 | 0.273 | NA    | NA    |
| <i>Azospira oryzae</i>              | 0.196 | 0.020 | NA    | NA    |
| <i>Alicyclophilus denitrificans</i> | 0.189 | 0.229 | NA    | NA    |
| <i>Oscillatoria nigro-viridis</i>   | 0.189 | 0.065 | NA    | NA    |
| <i>Burkholderia ambifaria</i>       | 0.171 | 0.264 | 0.002 | 0.002 |
| <i>Mesorhizobium loti</i>           | 0.164 | 0.213 | 0.062 | 0.056 |
| <i>Rhizobium leguminosarum</i>      | 0.158 | 0.099 | 0.163 | 0.179 |
| <i>Sorangium cellulosum</i>         | 0.157 | 0.172 | 0.001 | 0.003 |
| <i>Methylibium petroleiphilum</i>   | 0.154 | 0.222 | 0.000 | 0.001 |
| <i>Chitinophaga pinensis</i>        | 0.148 | 0.070 | 0.001 | 0.003 |

|                                        |       |       |       |       |
|----------------------------------------|-------|-------|-------|-------|
| <i>Leptothrix cholodnii</i>            | 0.147 | 0.212 | NA    | NA    |
| <i>Amycolatopsis mediterranei</i>      | 0.145 | 0.221 | 0.008 | 0.017 |
| <i>Rhizobium tropici</i>               | 0.139 | 0.089 | NA    | NA    |
| <i>blood disease bacterium R229</i>    | 0.137 | 0.216 | 0.004 | 0.009 |
| <i>Pseudoxanthomonas suwonensis</i>    | 0.137 | 0.134 | 0.001 | 0.003 |
| <i>Nectria haematococca</i>            | 0.134 | 0.125 | NA    | NA    |
| <i>Burkholderia sp. CCGE1003</i>       | 0.129 | 0.104 | 0.000 | 0.001 |
| <i>Acidovorax citrulli</i>             | 0.128 | 0.178 | NA    | NA    |
| <i>Cupriavidus metallidurans</i>       | 0.128 | 0.157 | 0.006 | 0.004 |
| <i>Mesorhizobium opportunistum</i>     | 0.115 | 0.165 | 0.003 | 0.003 |
| <i>Streptomyces bingchenggensis</i>    | 0.112 | 0.136 | 0.000 | 0.001 |
| <i>Mesorhizobium australicum</i>       | 0.108 | 0.153 |       |       |
| <i>Novosphingobium aromaticivorans</i> | 0.103 | 0.275 | 0.005 | 0.011 |
| <i>Azoarcus sp. KH32C</i>              | 0.100 | 0.132 | NA    | NA    |
| <i>Chryseobacterium sp. StRB126</i>    | 0.100 | 0.077 | NA    | NA    |

<sup>1</sup> Table cells filled with green color indicated that the relative abundances of those taxons in MGZ31DRh were higher than those in MGZ31J1DRh using two methods.

<sup>2</sup> Table cells filled with yellow color indicated that the relative abundances of those taxons in MGZ31DRh were lower than those in MGZ31J1DRh using two methods.

<sup>3</sup> Those digits with red color indicated that the relative abundance of the taxon in one sample was higher than that of the other sample.

<sup>4</sup> NA = not announced because it was much less than 0.001.

Table S16. The relative abundances of major N-fixing rhizobacterial genera based on metagenome taxonomic assignment.

| Major N-fixing genera                 | Relative abundances (%)                             |                |                                                         |                |
|---------------------------------------|-----------------------------------------------------|----------------|---------------------------------------------------------|----------------|
|                                       | Taxonomic assignment based on clean reads alignment |                | according to Species abundance assembled by SOAPdenovo2 |                |
|                                       | MGZ31DRh                                            | MGZ31J1DRh     | MGZ31DRh                                                | MGZ31J1DRh     |
| <i>Aminobacter</i>                    | 0.00032                                             | 0.00027        | ND <sup>3</sup>                                         | ND             |
| <b>Bradyrhizobium</b> <sup>1</sup>    | <b>30.40311</b> <sup>4</sup>                        | 19.49668       | <b>45.27589</b>                                         | 19.792224      |
| <i>Devosia</i>                        | 0.00048                                             | 0.00068        | ND                                                      | ND             |
| <i>Mesorhizobium</i>                  | 1.34678                                             | <b>1.80846</b> | <b>0.62784</b>                                          | 0.18507        |
| <i>Methylobacterium</i>               | 0.31011                                             | <b>0.43265</b> | <b>0.23182</b>                                          | 0.18205        |
| <b>Ochrobactrum</b>                   | <b>0.01499</b>                                      | 0.00555        | 0.08803                                                 | 0.07831        |
| <i>Phyllobacterium</i>                | 0.00032                                             | 0.00068        | <b>0.01349</b>                                          | ND             |
| <b>Rhizobium</b>                      | <b>1.27890</b>                                      | 0.99811        | 0.44236                                                 | 0.50449        |
| <b>Burkholderia</b> <sup>2</sup>      | 3.92505                                             | <b>5.87022</b> | 0.79485                                                 | <b>1.28372</b> |
| <i>Agrobacterium</i>                  | 0.17710                                             | <b>0.32084</b> | 0.07515                                                 | 0.06271        |
| <i>Azorhizobium</i>                   | 0.01282                                             | 0.01719        | 0.00018                                                 | 0.00180        |
| <b>Ensifer (Sinorhizobium)</b>        | 0.05796                                             | 0.06755        | 0.12303                                                 | 0.14765        |
| <b>Cupriavidus</b>                    | 6.25037                                             | <b>7.24047</b> | 0.10829                                                 | <b>0.14716</b> |
| <i>Microvirga</i>                     | 0.00040                                             | 0.00108        | 0.16556                                                 | 0.13158        |
| <i>Shinella</i>                       | 0.00008                                             | 0.00014        | ND                                                      | ND             |
| <i>Achromobacter</i> <sup>5</sup>     | <b>1.08995</b>                                      | 0.50399        | 0.01609                                                 | 0.03549        |
| <i>Acinetobacter</i>                  | 0.02765                                             | 0.02802        | 0.09187                                                 | 0.14001        |
| <i>Bacillus</i>                       | 0.52276                                             | <b>0.93611</b> | 0.06399                                                 | <b>0.14525</b> |
| <i>Paenibacillus</i>                  | 0.02515                                             | 0.04887        | 0.03711                                                 | 0.08320        |
| <i>Pseudomonas</i>                    | 1.25311                                             | <b>1.89808</b> | 0.59385                                                 | <b>0.92770</b> |
| <i>Stenotrophomonas</i>               | <b>0.51478</b>                                      | 0.39678        | 0.01969                                                 | 0.02895        |
| SUM of main symbiotic N-fixing genera | 43.77879                                            | 36.26057       | 47.94649                                                | 23.51676       |
| SUM of all N-fixing genera            | 47.21219                                            | 40.07242       | 48.76909                                                | 23.87736       |

<sup>1</sup> Table cells filled with green color indicated that the relative abundances of those taxa in MGZ31DRh were higher than those in MGZ31J1DRh using two methods.<sup>2</sup> Table cells filled with yellow color indicated that the relative abundances of those taxa in MGZ31DRh were lower than those in MGZ31J1DRh using two methods.<sup>3</sup> ND = Not Detectable.<sup>4</sup> Digits with bold fonts indicated that the relative abundance of the genus in one sample was obviously more than that of the other sample.<sup>5</sup> Those associate nitrogen-fixing genera were labeled with gray color.



Table S17. Statistics of KEGG Pathway enrichment analysis of genes between MGZ31DRh-VS-MGZ31J1DRh (SOAP).

| #  | Pathway                                     | DEGs with pathway annotation (1955) | All genes with pathway annotation (32949) | p-value            | Q-value            | Pathway ID |
|----|---------------------------------------------|-------------------------------------|-------------------------------------------|--------------------|--------------------|------------|
| 1  | Cell cycle - Caulobacter                    | 42 (2.15%)                          | 366 (1.11%)                               | <b>3.55E-05</b>    | <b>0.006788776</b> | ko04112    |
| 2  | Basal transcription factors                 | 4 (0.2%)                            | 7 (0.02%)                                 | <b>0.00037405</b>  | <b>0.035721746</b> | ko03022    |
| 3  | Meiosis - yeast                             | 24 (1.23%)                          | 200 (0.61%)                               | <b>0.000830155</b> | <b>0.051638684</b> | ko04113    |
| 4  | Aminoacyl-tRNA biosynthesis                 | <b>48 (2.46%)</b>                   | 514 (1.56%)                               | <b>0.001350572</b> | <b>0.051638684</b> | ko00970    |
| 5  | <b>DNA replication</b>                      | 33 (1.69%)                          | 318 (0.97%)                               | <b>0.001351798</b> | <b>0.051638684</b> | ko03030    |
| 8  | Nucleotide excision repair                  | 30 (1.53%)                          | 291 (0.88%)                               | <b>0.002400009</b> | <b>0.057300215</b> | ko03420    |
| 9  | <b>Pyrimidine metabolism</b>                | <b>65 (3.32%)</b>                   | <b>777 (2.36%)</b>                        | <b>0.00347283</b>  | <b>0.061099928</b> | ko00240    |
| 12 | <b>Purine metabolism</b>                    | <b>95 (4.86%)</b>                   | <b>1241 (3.77%)</b>                       | <b>0.006673909</b> | 0.106226385        | ko00230    |
| 13 | <b>Fatty acid metabolism</b>                | <b>47 (2.4%)</b>                    | <b>549 (1.67%)</b>                        | <b>0.007778682</b> | 0.11283013         | ko00071    |
| 15 | <b>Legionellosis</b>                        | 14 (0.72%)                          | 116 (0.35%)                               | <b>0.008861005</b> | 0.11283013         | ko05134    |
| 16 | Methane metabolism                          | 46 (2.35%)                          | 546 (1.66%)                               | <b>0.01100436</b>  | 0.131364547        | ko00680    |
| 17 | Alanine, aspartate and glutamate metabolism | 46 (2.35%)                          | 557 (1.69%)                               | <b>0.01525446</b>  | 0.171388345        | ko00250    |
| 18 | <b>ABC transporters</b>                     | <b>87 (4.45%)</b>                   | <b>1180 (3.58%)</b>                       | <b>0.02177061</b>  | 0.231010362        | ko02010    |
| 20 | Aminobenzoate degradation                   | 36 (1.84%)                          | 430 (1.31%)                               | <b>0.02426478</b>  | 0.231728649        | ko00627    |
| 21 | Adipocytokine signaling pathway             | 12 (0.61%)                          | 109 (0.33%)                               | <b>0.02824839</b>  | 0.256925833        | ko04920    |
| 26 | C5-Branched dibasic acid metabolism         | 13 (0.66%)                          | 131 (0.4%)                                | <b>0.04768491</b>  | 0.350300685        | ko00660    |
| 27 | Ribosome biogenesis in eukaryotes           | 4 (0.2%)                            | 24 (0.07%)                                | 0.05078217         | 0.350353731        | ko03008    |
| 28 | Nitrogen metabolism                         | 27 (1.38%)                          | 328 (1%)                                  | 0.05428962         | 0.350353731        | ko00910    |

Note 1. DEG means differentially expressed genes.

Table S18. Statistics of KEGG Pathway enrichment of genes with different abundance between MGZ31DRh-VS-MGZ31J1DRh (IDBA-UA).

| #  | Pathway                                     | DEGs with pathway annotation (5775) | All genes with pathway annotation (39776) | <i>p</i> -value    | Q-value            | Pathway ID |
|----|---------------------------------------------|-------------------------------------|-------------------------------------------|--------------------|--------------------|------------|
| 1  | RNA polymerase                              | 74 (1.28%)                          | 293 (0.74%)                               | <b>8.91E-07</b>    | <b>0.000205923</b> | ko03020    |
| 2  | <b>ABC transporters</b>                     | <b>170 (2.94%)</b>                  | <b>861 (2.16%)</b>                        | <b>1.46E-05</b>    | <b>0.001680624</b> | ko02010    |
| 3  | Bacterial invasion of epithelial cells      | 23 (0.4%)                           | 70 (0.18%)                                | <b>8.68E-05</b>    | <b>0.00668123</b>  | ko05100    |
| 4  | <b>Pyrimidine metabolism</b>                | <b>206 (3.57%)</b>                  | <b>1121 (2.82%)</b>                       | <b>0.000179293</b> | <b>0.010354148</b> | ko00240    |
| 5  | Caprolactam degradation                     | 25 (0.43%)                          | 90 (0.23%)                                | <b>0.000809603</b> | <b>0.037403659</b> | ko00930    |
| 6  | Dioxin degradation                          | 9 (0.16%)                           | 21 (0.05%)                                | <b>0.001590348</b> | <b>0.061228398</b> | ko00621    |
| 7  | Protein processing in endoplasmic reticulum | 17 (0.29%)                          | 58 (0.15%)                                | <b>0.002842037</b> | <b>0.093787221</b> | ko04141    |
| 8  | <b>Purine metabolism</b>                    | <b>325 (5.63%)</b>                  | <b>1961 (4.93%)</b>                       | <b>0.004979506</b> | 0.128067375        | ko00230    |
| 9  | <b>Legionellosis</b>                        | 47 (0.81%)                          | 223 (0.56%)                               | <b>0.004989638</b> | 0.128067375        | ko05134    |
| 11 | Polycyclic aromatic hydrocarbon degradation | 27 (0.47%)                          | 118 (0.3%)                                | <b>0.009921172</b> | 0.208344612        | ko00624    |
| 15 | Ribosome biogenesis in eukaryotes           | 5 (0.09%)                           | 12 (0.03%)                                | <b>0.02094695</b>  | 0.273166254        | ko03008    |
| 18 | <b>Fatty acid metabolism</b>                | <b>157 (2.72%)</b>                  | <b>929 (2.34%)</b>                        | <b>0.02240152</b>  | 0.273166254        | ko00071    |
| 19 | Limonene and pinene degradation             | 63 (1.09%)                          | 339 (0.85%)                               | <b>0.02246822</b>  | 0.273166254        | ko00903    |
| 20 | <b>DNA replication</b>                      | 82 (1.42%)                          | 462 (1.16%)                               | <b>0.03011706</b>  | 0.33446567         | ko03030    |
| 22 | Sulfur metabolism                           | 42 (0.73%)                          | 219 (0.55%)                               | <b>0.03450341</b>  | 0.362285805        | ko00920    |
| 23 | Drug metabolism - cytochrome P450           | 21 (0.36%)                          | 97 (0.24%)                                | <b>0.03710553</b>  | 0.372668584        | ko00982    |
| 24 | Fluorobenzoate degradation                  | 10 (0.17%)                          | 38 (0.1%)                                 | <b>0.04073445</b>  | 0.383812186        | ko00364    |
| 26 | <b>Nitrogen metabolism</b>                  | <b>97 (1.68%)</b>                   | <b>565 (1.42%)</b>                        | <b>0.04319964</b>  | 0.383812186        | ko00910    |

Note 1. DEG means differentially expressed genes.

Table S19. Detection of functional genes involved in PGPT plus N<sub>2</sub>-metabolism based on data assembled by SOAPdenovo2.

| Gene name                | ID of KEGG | ID of [denovogenes] | MGZ31DRh<br>(assembled by<br>SOAPdenovo2) |                   | MGZ31J1DRh<br>(assembled by<br>SOAPdenovo2) |                   | Gene length <sup>2</sup><br>(bp) | p-value <sup>3</sup> | FDR <sup>4</sup> |
|--------------------------|------------|---------------------|-------------------------------------------|-------------------|---------------------------------------------|-------------------|----------------------------------|----------------------|------------------|
|                          |            |                     | Hits <sup>1</sup>                         | Gene<br>Abundance | Hits <sup>1</sup>                           | Gene<br>Abundance |                                  |                      |                  |
| <i>ACC deaminase</i>     | K01505     | _7867               | 94                                        | 0.08382           | 38                                          | 0.03254           | 1014                             | 0.000162             | 0.001994         |
| <b>Nitrogen fixation</b> |            |                     |                                           |                   |                                             |                   |                                  |                      |                  |
| <i>nifH</i>              | K02588     | _11029              | 63                                        | 0.07023           | 24                                          | 0.02676           | 897                              | 0.000954             | 0.008244         |
| <i>nifD</i>              | K02586     | _1953               | 138                                       | 0.09091           | 60                                          | 0.03953           | 1518                             | 2.55E-05             | 0.000446         |
| <i>nifK</i>              | K02591     | _1765               | 108                                       | 0.06936           | 40                                          | 0.02569           | 1557                             | 7.66E-06             | 0.000162         |
| <i>nifA</i>              | K02584     | _914                | 146                                       | 0.08004           | 57                                          | 0.03125           | 1824                             | 8.16E-07             | 2.36E-05         |
| <i>nifB</i>              | K02585     | _1768               | 150                                       | 0.09634           | 47                                          | 0.03019           | 1557                             | 8.81E-10             | 4.74E-08         |
| <i>nifE</i>              | K02587     | _1207               | 121                                       | 0.07101           | 50                                          | 0.02934           | 1704                             | 2.65E-05             | 0.000459         |
| <i>nifN</i>              | K02592     | _2641               | 97                                        | 0.06924           | 51                                          | 0.03640           | 1401                             | 0.009726             | <b>0.046254</b>  |
| <i>nifQ</i>              | K15790     | _19388              | 39                                        | 0.05462           | 12                                          | 0.01681           | 714                              | 0.001777             | <b>0.013221</b>  |
| <i>NifV</i>              | K02594     | _4823               | 91                                        | 0.07660           | 30                                          | 0.02525           | 1188                             | 4.97E-06             | 0.000113         |
| <i>nodB</i>              | K14659     | _22892              | 32                                        | 0.04848           | 8                                           | 0.01212           | 660                              | 0.001193             | 0.009631         |
| <i>nodC</i>              | K14666     | _2865               | 112                                       | 0.08151           | 46                                          | 0.03348           | 1374                             | 4.71E-05             | 0.000731         |
| <i>fixA</i>              | K03521     | _12973              | 43                                        | 0.05101           | 11                                          | 0.01305           | 843                              | 0.000193             | 0.002334         |
| <i>fixB</i>              | K03522     | _6039               | 85                                        | 0.07678           | 34                                          | 0.03071           | 1107                             | 0.000263             | 0.003017         |
| <i>fixC</i>              | K00313     | _3403               | 89                                        | 0.06804           | 38                                          | 0.02905           | 1308                             | 0.000557             | 0.005421         |
| <i>fixJ</i>              | K14987     | _24986              | 40                                        | 0.06319           | 13                                          | 0.02053           | 633                              | 0.002426             | <b>0.016724</b>  |
| <i>fixL</i>              | K14986     | _13945              | 45                                        | 0.05474           | 18                                          | 0.02190           | 822                              | 0.008425             | <b>0.041790</b>  |

| Plant disease suppression               |        |        |     |          |           |                |      |          |                 |
|-----------------------------------------|--------|--------|-----|----------|-----------|----------------|------|----------|-----------------|
| <i>β-1,3-glucanase</i>                  | K01210 | _20254 | 39  | 0.055556 | 6         | 0.008547       | 702  | 7.72E-06 | 0.000163        |
| Phosphate solubilization                |        |        |     |          |           |                |      |          |                 |
| <i>GDH</i>                              | K00117 | _993   | 161 | 0.08989  | 46        | 0.02568        | 1791 | 1.04E-11 | 7.22E-10        |
| Siderophore (iron carrier)              |        |        |     |          |           |                |      |          |                 |
| <i>dhbF</i>                             | K04780 | _3581  | 16  | 0.01237  | <b>31</b> | <b>0.02398</b> | 1293 | 0.004064 | <b>0.024793</b> |
| Nitrogen metabolism other related genes |        |        |     |          |           |                |      |          |                 |
| <i>cynT/can</i>                         | K01673 | _2190  | 40  | 0.02710  | 7         | 0.00474        | 1476 | 1.55E-05 | 0.000292        |
| <i>ncd2/npd</i>                         | K00459 | _7932  | 70  | 0.06924  | 22        | 0.02176        | 1011 | 3.27E-05 | 0.000541        |
| <i>gltD</i>                             | K00266 | _2278  | 105 | 0.07202  | 41        | 0.02812        | 1458 | 3.00E-05 | 0.000503        |
| <i>gltB</i>                             | K00265 | _235   | 217 | 0.08810  | 98        | 0.03979        | 2463 | 5.14E-07 | 1.58E-05        |
| <i>nirK</i>                             | K00368 | _4535  | 1   | 0.00083  | <b>51</b> | <b>0.04208</b> | 1212 | 5.51E-17 | 5.91E-15        |
| <i>nirB</i>                             | K00362 | _239   | 212 | 0.08618  | 85        | 0.03455        | 2460 | 7.60E-09 | 3.53E-07        |

<sup>1</sup> The number of hits represented the number of mapped reads of single denovogene detected in the sample.

<sup>2</sup> The gene length (bp) was listed according to those denovogenes assembled by SOAPDENOV02.

<sup>3</sup> Table cells were filled with gray color when p-value was less than 0.01 but more than 0.001.

<sup>4</sup> Table cells were filled with gray color too when FDR was less than 0.1 but more than 0.001.
